# Supplementary material for: Transposable element dynamics and PIWI regulation impacts lncRNA and gene expression diversity in Drosophila ovarian cell cultures
Source: HighWire-hosted journal article supplement (doi:10.1101/gr.178129.114), 2014-09-29
Supplement: Supplemental_Legends_Methods.docx [file Supplemental_Legends_Methods.docx]

**Sytnikova, et al.**

**SUPPLEMENTAL FIGURE AND TABLE LEGENDS

Figure S1. Karyotypes and culturing of OSC and OSS cells.**

A) Fixed metaphase chromosome spreads stained with DAPI and imaged at 100x magnification. B) Phase contrast 20X images of OSS cells undergoing a typical culture crisis and recovery.

**Figure S2. CLIP-seq identifies PIWI-associated transcript fragments includingTEs.**

A) Specific IP controls that were used in this study. Left panel shows epitope-blocking peptide (specificity negative control) completely inhibits the IP of PIWI. Right panel shows reproducibility of IPs between the mouse monoclonal (mAb) and rabbit polyclonal (rAb) anti-PIWI antibodies. B) Validation of the PIWI CLIP method by western blotting and RNA radiolabeling showing that RNA signal is enriched in PIWI complexes after UV crosslinking. C) Length distribution of piRNA sequences and PIWI CLIP-seq tags from four biological replicates. D) Sequences mapped to piRNAs are within the PIWI CLIP-seq reads. Length distribution is shifted due to RNase T1 trimming upon CLIP procedure. E) Proportions of CLIP-seq, RNA-seq, antigen blocked Piwi IPs, and piRNA reads from OSS cells. “Other” denotes intergenic sequences and those that could not be mapped to the *D.melanogaster* Release 5/Dm3 reference genome. F) Additional PIWI CLIP-seq profiles and corresponding piRNAs profiles of TEs with top PIWI CLIP scores and where the CLIP tags suggest a piRNA cluster precursor transcript. Plus strand reads are red, minus strand reads are blue. Normalized CLIP-seq reads were deemed significant from our CLIP-seq processing algorithm (see Methods). RPMs: reads per million.

**Figure S3. Relationships between piRNAs and TE transcript regulation by PIWI and PIWI association.** A) Positive correlation between antisense piRNAs to antisense PIWI CLIP tags for TEs, indicating that a proportion of CLIP tags are piRNA precursors. B) Positive correlation is seen for TEs showing PIWI-mediated expression change and the number of antisense piRNAs targeting the TEs (left). Sensitivity to PIWI is strongly increased once TE is targeted by >1000 RPMs of antisense piRNAs. Conversely, much less correlation is observed with sense piRNAs that cannot target the TEs (right).C) Positive correlation between the expression change of TE transcripts and the number of antisense piRNAs is seen in all cellular compartments, although a few extreme examples and exceptions are noted with labels. D) Most TEs conform to a direct correlation between nascent RNA changes and cytoplasmic RNA changes after PIWI knockdown, however a few TEs noted in the dashed line box are exceptions for changing in the cytoplasm without a change at the nascent RNA level. E) There is a positive correlation in TE expression change with the number of Antisense PIWI CLIP tags, but apparently no correlation between Sense PIWI CLIP tags and TE expression change.

**Figure S4. Genic transcripts with high PIWI CLIP scores.**A) Metagene analysis of the genic PIWI CLIP tag proportions amongst genes with top PIWI CLIP scores in OSS cells, compared to genic piRNA proportions. B) Heat map of a select set of genic transcripts with the highest PIWI CLIP scores and their gene expression changes after PIWI knockdown as measured by RNA-seq. C) CLIP-seq patterns along with corresponding genic piRNA profile for selected genes with top PIWI CLIP scores. CA-rich motif locations are shown on the top of gene maps. Below all the maps are analysis results showing that CA-rich motif is enriched in top CLIP-tag genes as determined with MEME ([Bailey et al. 2009](#_ENREF_3)), GLAM2 ([Frith et al. 2008](#_ENREF_9)), and the Weeder ([Pavesi and Pesole 2006](#_ENREF_21)) motif searching programs. D) RIP validation of genic transcripts associated with PIWI in OSS cells. *RpL32* and *Mec2* were analyzed as negative controls. Error bars correspond to standard deviation from 5 biological replicates. E) RT-qPCR confirmation of gene expression changes from (A), normalized to *RpL32* levels between siPIWI and siGFP samples. Shown are average values from 6 biological replicates and the standard deviation. F) Western blots of representative genes with high PIWI CLIP scores in OSS cells after PIWI knockdown. G) Coomassie stained gel of purified recombinant GST-PIWI and comparison with a previously published GST-PIWI prep used to demonstrate Piwi slicing activity ([Saito et al. 2006](#_ENREF_29)). Asterisk marks co-purifying chaperones from bacteria. H) Recombinant GST-PIWI binds nucleic acids without specificity to CA-rich motif. Electrophoretic mobility shift assay (EMSA) was performed with 5’-end 32P-labeled in vitro transcribed Bantam RNA, synthetic piR-142847 RNA, or a synthetic fragment of Akap200 RNA that contained the PIWI CLIP-seq identified motif (CACCACCA). Unlabeled nucleic acid competition was tested using 1 pmol of miR-*bantam*, piR-142847, *Akap200* RNA, non-specific long RNA, tRNA and non-specific DNA. Free, unbound RNA indicated by asterisks.

**Figure S5. A bioinformatics pipeline to discover *de novo* TEs from Illumina Single-End (SE) read genomic DNA libraries.**A) Theory for how sufficiently long SE reads can demarcate a *de novo* TE insertion. Black lines for the reads correspond to the portion matching the *D.melanogaster* Release 5/Dm3 reference genome, blue lines refer to the TE sequence. B) Flowchart of the pipeline design for identification of *de novo* TE insertions. C) Genome browser snapshots of the clusters of reads identified by our bioinformatics pipeline corresponding to a *de novo* TE. The top insertions at the *fau* and *Mec2* loci were validated in OSS cells, while the bottom insertions at the *Ex* and *Btk29a* loci were validated in OSC cells by us and ([Sienski et al. 2012](#_ENREF_31)). The distance measurement illustrates that span covered by 150bp reads from our OSC_E, OSS_E and OSS_C libraries and the 100bp reads from the OSC_C library sequenced by ([Sienski et al. 2012](#_ENREF_31)). D) Box plot of the read coverage diversity sampling 25 critical genes expressed in follicle cell cultures. The libraries have comparable read depth, which after normalizing according to read length exhibit very similar read coverage per base and suggests that the libraries are suitable for cross comparisons.

**Figure S6. Genome maps of *de novo* TE insertions in OSS and OSC cultures.**

Independent TE insertions were counted in 5kb bins and classified according to persistent insertions (Coverage Ratio, CR >4) pointing up and heterogeneous insertions (CR ≤ 4) pointing down. Chromosome band idiograms and reference genome TE proportions were extracted from the *D.melanogaster* Release 5/Dm3 reference genome at the UCSC Genome Browser.

**Figure S7. Difference maps comparing *de novo* TE insertions between OSS and OSC cultures.**

The TE landscapes of two cell lines are compared for the common or the cell passage-specific presence of the TE insertion. Persistent versus heterogeneous TE insertions are distinguished by color and offset on the vertical axis to enable visualization without overlapping dots. The number of dots in the middle rows corresponding to common TE insertions reflects how closely related two cell passages are to each other. Landscape maps are based on the *D.melanogaster* Release 5/Dm3 reference genome.

**Figure S8. Additional TE-associated lncRNAs in OSS cells.**

A) CPAT coding probabilities for follicle cell lines lncRNA candidates compared to a set of *D. melanogaster* protein coding genes and lncRNAs from the *Drosophila* modENCODE dataset. B) Representative lncRNAs in OSS cells which increase in expression upon PIWI knockdown. C) Heat map diagram for representative lncRNAs that overlap with genes and for which PIWI knockdown appears to reduce the expression of the genes’ coding strand. These lncRNAs are also associated with a nearby TE, either existing or *de novo* inserted. D) Representative lncRNAs in OSS cells that overlap antisense to genes and where that coding gene is downregulated upon PIWI knockdown. E) Heat map of representative OSS cell genes overlapped by lncRNAs and are up-regulated during PIWI knockdown, with coordinates from both Release 5 and Release 6 of the *D.melanogaster* reference genome.

**Figure S9. PIWI influences chromatin marks at lncRNAs loci.**

A) Chromatin immunoprecipitation (ChIP) analysis of the lncRNA locus at *RpL37b* for enrichment levels of histone H3 lysine 9 trimethylation (H3K9me3), RNA Polymerase II (RNA Pol II) and histone H3 lysine 36 trimethylation (H3K36me3). Three PCR amplicons are noted in green in the browser diagram correspond to non-coding sequence around the lncRNA locus, outside of the de novo TE insertions. Error bars are standard deviations from triplicates, whereas the absences of error bars are experiments showing the average of duplicates. B) ChIP and RT-qPCR of two lncRNA loci in OSCs, similar to the analysis in A).

**Table S1. Statistics of Illumina deep sequencing of libraries for CLIP-seq, RNA-seq, Nascent-Seq, and gDNA-seq**

**Table S2. PIWI CLIP and expression analysis of TEs and Genes in OSS_C cells.**

**Table S3. Genes up-regulated upon PIWI KD and near a *de novo* TE insertion in OSS_C and OSC_C cells.**

**Table S4. *De novo* TE insertions in *Drosophila* gonadal cell cultures.**

**Table S5. TE-associated lncRNAs in *Drosophila* gonadal cell cultures.**

**Table S6. Oligonucleotides and siRNAs used in this study.**

**SUPPLMENTARY TEXT AND DISCUSSION**

**Specificity and reproducibility considerations in our PIWI CLIP-seq experiment**

We conducted our PIWI CLIP-seq experiment with three independent biological replicate IPs with a rabbit polyclonal antibody raised against a peptide of the first 16 N-terminal amino acids of PIWI ([Brennecke et al. 2007](#_ENREF_4)). We were able to completely block the antigen recognition site on our PIWI antibody with this peptide during an IP with OSS whole cell extract, which we deeply sequenced as an appropriate negative control (Fig. S2A). Finally, we conducted a fourth biological replicate PIWI CLIP-seq using a mouse monoclonal antibody raised against a different globular domain of PIWI distinct from our peptide ([Saito et al. 2006](#_ENREF_29)). The average depth of the CLIP libraries were ~20 million reads deep, including the negative control antigen blocking peptide library that was mainly comprised of unmappable and structural RNA fragments that we interpret as background nucleic acids (Table S1). Our PIWI CLIP libraries were mainly comprised of longer fragments that we sequenced only from a single end at up to 43 or 50 base pairs (bp), and piRNAs were captured in these libraries but their stability and length profiles were likely affected by the RNAse T1 treatment since piRNA tags were shortened by several nucleotides to a 3' terminal G, the recognized base where RNase T1 cleaves (Fig. S2D). Nevertheless, our PIWI CLIP libraries had a distinct genome annotation profile compared to piRNAs and mRNAs profiled from RNA-seq (Fig. S2E).

We merged reads into unique sequences, mapped with no more than 2 mismatches, and then used RNA-seq data to generate an *in silico* CLIP normalization profile for each transcript to determine which sequence elements garnered CLIP tags to represent significant PIWI enrichment. We were encouraged by the low background of signal for the vast majority of targeted transcripts from the antigen blocking peptide library, as well as high degree of reproducible patterns of significant CLIP tags between the four PIWI CLIP replicates from two different PIWI antibodies (see main text, Fig. 1, S2 and S4).

We also examined *Drosophila* viral transcripts because abundant viral piRNAs have been previously detected in OSS cells ([Wu et al. 2010](#_ENREF_36)). Although several virus transcripts exhibited some significant Piwi CLIP tags, they had poor enrichment scores because of comparable tags in the blocking peptide library. Therefore, we did not carry viral transcripts forward in our analysis.

**Analysis of punctate PIWI CLIP tag patterns and gene expression changes**

A meta-gene analysis of the 260 genes with PIWI CLIP scores greater than 1.5 fold over the antigen blocking peptide library displayed preferred patterns within the Open Reading Frame (ORF) and more punctate peaks within the 5' and 3' UTRs (Fig. S4A). Although Gene ontology (GO) analysis of these genes did not point to enriched GO terms, a motif analysis did identify a CA-rich sequence motif that was significantly enriched in each of the four biological replicates of PIWI CLIP-seq libraries (Fig. S4C, and more below). Interestingly, this PIWI CLIP pattern on genic transcripts contrasts with the 3'UTR bias of abundant genic piRNAs that is conserved from flies to mammals and are depleted in TE sequences ([Robine et al. 2009](#_ENREF_26); [Saito et al. 2009](#_ENREF_28)). We then evaluated the impact of PIWI on this first group of mRNAs with functional tests such as conducting western blots for the endogenous proteins with available antibodies (Fig. S4F), and *in vitro* binding experiments between recombinant PIWI and the mRNA elements (Fig.S4G-H). We also cloned the gene segments containing the CA-rich motifs into the 3'UTR or 5'UTR of a luciferase reporter constructs that were then transfected into OSS cells with knocked down PIWI ([Post et al. 2014](#_ENREF_24)). Despite the reproducible PIWI association with these transcripts in RNA-IP (RIP) assays supporting the high PIWI CLIP-scores (Fig. S4D), a battery of tests showed modest associations of these RNA elements to recombinant PIWI *in vitro* and moderate regulation of these genes on western blots and in reporter assays containing these sequence elements suggested that their regulation is too subtle to be detected with these tests or that these transcripts are indirectly interacting with PIWI.

We sought to determine if sequence motifs were significantly enriched amongst the genic transcripts with punctate peaks of PIWI CLIP tags (Fig S4C), which we determined were significant because these peaks passed the noise filter in the HITS-CLIP processing pipeline and were nearly absent in the antigen blocking peptide negative control library and completely absent from an input set of randomly selected mRNAs expressed in OSS cells. To control for possible biases of using a single motif prediction program, we submitted the top 50 high PIWI CLIP score mRNAs to three different motif searching algorithms run under standard default parameters except for allowing measuring the motif to be repeated more than once amongst each input sequence. We ran three independently-developed algorithms that use different information-searching strategies: MEME ([Bailey et al. 2009](#_ENREF_3)), GLAM2 ([Frith et al. 2008](#_ENREF_9)), and Weeder ([Pavesi and Pesole 2006](#_ENREF_21)).

All three algorithms identified the same CA-rich sequence motif as the top or nearly the top high scoring motif (Fig. S4C), which was represented in the middle of reads and by a diverse number (>60,000) of uniquely sequenced and uniquely mapping reads, and could typically be found in the highest peaks of genic PIWI-CLIP tag patterns (data not shown). The base compositions of the four PIWI CLIP-seq libraries were not that significantly distorted (A: 26%; C: 27%; G:23%; T:23%), which together with the other features, may suggest that PIWI may prefer to interact directly or indirectly with this motif, analogous to how mammalian Ago2 has been proposed to bind a G-rich motif in transcripts independently of miRNAs ([Leung et al. 2011](#_ENREF_18)).

To assess gene expression changes from the RNA-seq profiling, we compared two methodologies: 1) a straightforward arithmetic approach and 2) a package approach using R program packages for analyzing differential gene expression from deep sequencing counts. In our arithmetic approach, we normalized quality-passing RNA-seq reads per million of total reads and per kilobase (RPKM) for each gene, then divided the ratio of RPKM values for genes to *Rp49* (also known as the housekeeping gene *RpL32*). Furthermore, we normalized this ratio from siPIWI treatments to the matched siGFP control for four biological replicates, calculated the means and standard deviations, and considered average gene expression changes that were not exceeded by 1 sigma. Our RT-qPCR measurements in Fig. S4E corroborated the arithmetic in calculating these gene expression changes.

We also processed our RNA-seq data through the R program packages of DESeq ([Anders and Huber 2010](#_ENREF_1)) and EdgeR ([Robinson et al. 2010](#_ENREF_27)), but found limitations in the very conservative and short list of expression change calls by DESeq which has also been observed by others in benchmarking studies ([Rapaport et al. 2013](#_ENREF_25)). Our arithmetic approach and RT-qPCR analysis identified *fau* and *Mec2* loci as affected by PIWI knockdown, yet DESeq failed to identify them and barely could detect knockdown of PIWI transcripts. In contrast, the results from an EdgeR run was much more reflective of the experimentally determined gene expression changes and highlighted nearly the same list of genes with expression changes that we had determined arithmetically.

**Custom pipeline for increased sensitivity and specificity in detecting *de novo* TE insertions from longer Illumina Single-End reads.**

In contrast to other studies which employ Paired-End (PE) read libraries ([Khurana et al. 2011](#_ENREF_16); [Perrat et al. 2013](#_ENREF_23)), we could characterize these TE landscapes from simpler SE read libraries through our novel bioinformatics pipeline that precisely yielded exact insertion coordinates and annotations, tracking of coverage heterogeneity, and marking the common and distinct *de novo* TE insertions. Locating significant clusters of reads that spanned the border of experimentally-validated de novo TE insertion sites provided evidence that mining ≥100nt long SE read genomic DNA libraries would sufficiently identify other de novo TE insertions (Fig. S5). Our systematic approach first removed reads that do not have the criteria of one end matching the reference genome while the other end matched a TE sequence. Thus, reads that align (0 mismatches, MM) to *Drosophila* viral genome and ribosomal RNA were removed first. Next, Bowtie ([Langmead et al. 2009](#_ENREF_17)) was used to remove reads that completely mapped to consensus *Drosophila melanogaster* TE sequences (3MM) in Repbase Release 19 ([Kapitonov and Jurka 2008](#_ENREF_13)) and FlyBase Release 5 ([Kaminker et al. 2002](#_ENREF_12)), then the masked (3MM) and unmasked (1MM) reference Release 5/Dm3 genome of *D.melanogaster.*

These remaining reads were then split at the 5' and 3' ends into 22’mer sequences and Bowtie was used to map the 22’mers to the masked genome (1MM) and consensus TE sequences (2MM). Candidate reads marking a TE insertion were identified when one part aligned uniquely to masked genome, and other part aligned to consensus TE (maximum 5 alignments) within the first or last 500 bases. Between 0.4-1.0% of these remaining reads passed this criteria, but to add additional stringency, we then mapped these reads to the reference genome with BLAT([Kent 2002](#_ENREF_14)) using the command line parameters: “blat -stepSize=3 -repMatch=2253 -minScore=0 -minIdentity=0 -maxIntron=10”. The top BLAT score for each read was then normalized by the read length to generate a BLAT ratio to spot false candidate reads that actually map to the reference genome beyond 4 mismatches or had gaps which Bowtie treats as unmappable. When the BLAT ratio exceeded 78% (78 matching bases / 100bp read) for the OSC_C library or exceeded 85% (128 matching bases / 150bp reads) for the remaining libraries, these reads were omitted. Remaining reads were clustered based on proximal genomic coordinates being within 150 bp or 300 bps and had the same TE name match. Each insertion site cluster was then required to have at least 4 reads and span a distance of 80 bases, a cutoff that was empirically determined to yield the optimal false discovery rate.

We empirically determined the False Discovery Rates (FDRs) by sampling at least 100 arbitrarily chosen Level 1 list of TE insertion read clusters, subjecting the individual reads in those clusters to BLAT on the *D.melanogaster* Release 5/Dm3 reference genome. We then inspected the patterns of the reads at the loci predicted by our *de novo* TE detection pipeline. We judged false positives when the reads in a cluster failed to form the configuration of a clear stop junction at the border of the predicted *de novo* TE site. Reasons for the generations of false positives could be: 1) split read portions might be simple sequence repeats that were not properly masked from the genome; 2) TE relics in the reference genome were not recognized by RepeatMasker; 3) small punctuated unique sequences that sporadically interrupted a TE and repeat dense region. We determined an average FDR of 12.1% and specific FDRs of 11.2%, 9.5%, 21.6% and 6% for the OSS_E, OSS_C, OSC_E and OSC_C libraries, respectively. False negatives were more difficult to determine without a means to validate known insertions that were missed by our algorithm, since we could place a *de novo* TE to a majority (82%) the lncRNAs and genes showing a change in gene expression changes but low PIWI CLIP-scores. If we were to assume that some of these loci were missing a designated TE, we can only estimate that the false negative rate is below 13%.

We observed a range of karyotypes within the OSS and OSC cultures (Fig. S1), and we believe that our genome sequencing was sampling the entire spectrum of TE insertions across different cells in the culture. Therefore, we computed and interpreted a Coverage Ratio measurement that is an appropriate quantity as used in Copy Number Variation analyses of tumour samples genomes. Our simple calculation of Coverage Ratio takes the number of reads corresponding to a TE insertion and divides against the number of reads mapping the reference genome at the coordinates covered by the TE insertion. To avoid null calculations of dividing by zero reads mapping the reference genome coordinates, we added a pseudocount of 1, so if a hypothetical TE insertion has 30 TE-insertion reads and 2 reference genome mapping reads in the same coordinates spanned by the TE insertion reads, its Coverage Ratio (CR) is 10 [30/(2+1)]. Since we implemented a sensitivity cutoff requiring at least 4 reads per TE cluster, these lowest represented clusters would have a maximum CR of 4.0, thus setting our boundary for distinguishing persistent TE insertions (CR >4)from heterogeneous insertions (CR ≤ 4).

**The challenge in defining lncRNAs in the *D.melanogaster* Release 5/Dm3 reference genome.**

In the compact *Drosophila* genome, intergenic regions are highly minimized compared to mammalian genomes, and this feature created challenges for us in automatically defining lncRNA boundaries. Amongst only three papers (not including ours) devoted to broad lncRNA determination in *Drosophila* ([Tupy et al. 2005](#_ENREF_33); [Young et al. 2012](#_ENREF_37); [Brown et al. 2014](#_ENREF_5)), each study developed their own custom methodologies and curation processes, attesting to the fluid and evolving state of the lncRNA field. A validation rate of 75–80% of unambiguous lncRNA candidates for which we were able to define clear coordinates supports the automated screen we initially developed to locate lncRNA candidates. However, we acknowledge a limited sensitivity in our procedure to automatically define the more ambiguous TE-associated lncRNA candidates such as *lncRNA-NL-CG4983* and *lncRNA-NL-Cyp4p2* (Fig. 5C), which span the same sense as a shorter protein coding gene but extended several kilobases downstream. We undertook a manual search for these ambiguous lncRNAs in OSCs because they were the most highly expressed lncRNAs in untreated OSCs near a TE and could be subjected to the PIWI RIP assay (Fig. 5D). In addition, these lncRNAs were only expressed strongly in OSCs and not in OSS cells, and were conducive to genomic PCR validation. Other lncRNAs in OSCs were typically only expressed highly after PIWI knockdown or had sequence features at TE insertions that hindered genomic PCR.

**DETAILED MATERIALS AND METHODS**

**OSS cells cultivation and siRNA treatments**

OSS cells were cultured according to ([Niki 2009](#_ENREF_20)) in M3 media supplemented with 10% heat inactivated FBS, 1X fly extract, 10 µg/ml insulin, 0.6 mg/ml glutathione. Although OSS cells would appear to grow and expand sufficiently in the first few weeks after thawing, the culture would begin to exhibit a stress phenotypes. Progressive splits retained fewer adherent cells, so to stabilize a culture back to healthy logarithmic growth, the remaining adherent cells are crowded into 24 well plates and a modified complete M3 medium containing 3X fly extract, 30ug/ml insulin, and 1.8mg/ml gluatathione. This concentrated medium was exchanged every 3 days, and cells are left undisturbed in the same 24 well plates for several weeks, up to 2 months, until adherent colonies formed. Recovered cultures were then gently split to progressively larger culture vessels until T25 and T75 flasks were achieved and the standard culture medium was resumed. Final culture stabilization required between 4 to 6 months.

For PIWI depletions, 500 pmoles siRNAs were electroporated into a 10cm plate of OSS cells using Amaxa kit V (program D013), and cells were cultured for 6 days before harvesting. Successful depletion was assessed by Western blotting.

**PIWI CLIP-seq procedure.**

OSS cells confluent in two 10 cm dishes were rinsed with PBS, irradiated with 254 nm UV light 1x 0.9 J/cm2 and 1x 0.4 J/cm2 and harvested. Protein A/G magnetic beads (Pierce) were coated with anti-PIWI antibodies at 60 µg per 60 µl of beads for 2 hours at 23°C, washed with PBS and resuspended in initial volume of Q buffer (20mM Hepes-KOH pH 7.9; 10% glycerol; 0.1 M KOAc; 0.2 mM EDTA; 1.5 mM MgCl2; 0.5 mM DTT; 1X Roche Complete EDTA-free Protease Inhibitor Cocktail; 0.5% NP40). For the antigen-blocking peptide block negative control experiment, 0.1mg/ml of the peptide CADDQGRGRRRPLNEDD was preincubated with antibody coated beads for 1hour prior to adding OSS cell lysate. Cells were lysed in Q buffer (5x volume in relation to the dry pellet), with 50 strokes of dounce homogenizer and sonicated 2 rounds for 30 sec (with 2 sec pulse/2 sec pause cycle, Qsonica); centrifuged 15000 rpm 30min 4°C; supernatant was treated with RNase T1 (Fermentas) 1 U/ml final dilution 10min 22° C, then cooled down 5 min on ice. IPs were performed by incubating with PIWI antibody coated beads on rotating wheel for 1.5 hours at 4°C. Beads were washed 5 times with Q buffer; and 1 time with detergent free Q buffer supplemented to 300 mM NaCl, then treated with CIP (100 U, NEB) in presence of Ribolock RNase inhibitor. Phosphatase was then washed out 3 times with wash buffer (50 mM Tris-HCl, pH 7.5, 20mM EGTA-NaOH, 0.5% NP40) and 4 times with PNK buffer (50 mM Tris-HCl, pH 7.5, 50mM NaCl, 10mM MgCl2). To confirm presence of associated RNAs, PIWI complexes were immunoprecipitated from extracts of OSS cells that were unmodified or subjected to UV crosslinking, and extracted RNAs were then labeled by PNK and 32P-γATP.

To generate CLIP-seq libraries, a pre-adenylated 3’ adaptor was ligated to PIWI-bound RNAs attached to beads by incubating them overnight on mild rotation at 14°C in reaction mix (500 pM of 3’ adaptor (Table S6), 50 U of T4 RNA ligase1 (NEB), 40 U Ribolock RNase inhibitor, 50mM Hepes-KOH (pH 8.3), 10mM MgCl2, 3.3 mM DTT, 10µg/mL BSA, 8% glycerol). Beads then were washed 4 times with Q buffer and 2 times with PNK buffer. For 5’-end phosphorylation 25 U of T4 PNK (NEB) was added to the beads in a reaction mix containing 1mM ATP, 5 mM of DTT, 80 U of Ribolock in PNK buffer, incubation was done for 1 hour at 37°C. Beads then were washed 4 times with PNK buffer and elution was done using Laemmlie SDS-PAGE loading buffer ([Sambrook and Russell 2006](#_ENREF_30)) for 10 min at 23°C followed by cooking for 5 min at 95°C. The elution fraction was then loaded on the Bis-Tris Nu-PAGE gel 4-12% (Invitrogen). The region around~ 80-200 kDa was cut, RNA was extracted by incubation of smashed gel slices with 4 mg/ml Proteinase K (in 300 mM NaCl, 1 mM EDTA) for 2h at 37°C, followed by addition of equal volume of acidic phenol and rotation overnight at 4°C. Water fraction was separated and back extracted with chloroform, RNA was cleaned up using RNA Clean & ConcentratorTM kit (Zymo Research), elute with 20 µl of the RNase free water. 5’ adaptor containing barcode was ligated overnight at 23°C in reaction mix (100 pM of 5’ adaptor (Table S6), 50 U of T4 RNA ligase1 (NEB), 40 U Ribolock RNase inhibitor, 1 mM ATP, 50mM Hepes-KOH (pH 8.3), 10mM MgCl2, 3.3 mM DTT, 10µg/mL BSA, 8% glycerol). Ligation mix was phenol-chloroform treated and cleaned up by RNA Clean & ConcentratorTM kit. Reverse transcription was done using half of the 5’ adaptor ligation product with 100 pmol of RT primer (18.206, Table S6) by SuperScript III reverse transcriptase. ¼ of RT mix was used for amplification with Phusion polymerase kit (Thermo Scientific) by adapter specific primers. PCR product was separated on 4% Agarose II gel (Amresco), products of size 100-200 bp. were extracted and after small scale verification subjected to the Illumina HiSeq 2000 platform (50 bp. run).

**RNP ImmunoPrecipitation (RIP) assay.**

Cell lysis and immunoprecipitation were performed essentially as in the case of CLIP, except without UV-crosslinking and RNase T1 treatment. IP was performed with 25 µl of protein A/G magnetic beads (Pierce) and 20 µg of antibody in presence of 1U/µl of Ribolock RNase inhibitor. Beads were washed 5 times with Q-column buffer; RNA was extracted with TRI reagent from 80% of beads. RT-qPCR was done using M‑MLV reverse transcriptase and GoTaq SybrGreen Master mix (Promega) on Bio‑Rad C1000 machine. 20% of beads were subjected to elution with Laemmlie loading buffer for IP confirmation by western immunoblot. The amount of immuno-precipitated RNA was normalized to the amount in 10% of input and rabbit IgG was used as a negative control.

**Cell fractionation, messenger RNA, Nascent RNA and RT-qPCR analysis.**

Cell fractionation and isolation of native transcripts (NUN fraction ) was done according to ([Khodor et al. 2011](#_ENREF_15)). 1% of each fraction was subjected to analysis by western blotting. RNA was extracted from OSS cells and fractions by TRI reagent RT (MRC, Inc). Remaining DNA was digested by 6U of DNase I (NEB).

Total RNA samples as well as RNA from cytoplasm and nucleoplasm were subjected to two rounds of polyA enrichment using biotinylated (dT)18 oligo and polyATtract kit (Promega). RNA from NUN fraction was depleted from ribosomal RNA using biotinylated oligo set ([Pennington et al. 2013](#_ENREF_22)). To avoid artefact due to library construction protocol specific biases RNA-seq libraries were obtained from 4 independent PIWI knockdown experiments using 4 different library construction protocols: 1) ScriptSeq V1 and 2) ScriptSeq V2 (Epicenter, performed according to manufacturer’s instructions) 3) Random primer based library construction protocol (Marr et al., 2013) 4) mRNA fragmentation followed by the small RNA library construction protocol (sRNA-seq,([Matts et al. 2014](#_ENREF_19)) ). For the last method, mRNA fraction was subjected to hydrolysis in alkaline buffer (45mM NaHCO3,5mM Na2CO3 (pH 9.5), 1mM EDTA) at 95o C for 20 minutes. Hydrolysis was terminated by chilling on ice and addition of 280 ul 0.3M NaOAc pH 5.2. Fragments were ethanol precipitated and subjected to size fractionation on 15% TBE-Urea gel. Fragments of size 24-35 nt. were excised, extracted from gel and subjected to 3’ end dephosphorylation by incubating with 10U of T4 PNK (NEB) in reaction buffer (100mM MES-NaOH pH 5.5, 300mM NaCl, 10mM MgCl2, 10mM β-Mercaptoethanol, 20U Ribolock) for 6 hours at 37ºC. Adaptor ligation and RT-PCR were performed according to the small RNA library construction method (Matts et al., 2013) with the difference that after 3’ ligation 5’end phosphorylation was performed using T4 PNK (NEB) in presence of 1 mM ATP. Sequencing was performed on an Illumina HiSeq 2000, and 50 bases long reads were processed and split according to their index primer barcodes.

To experimentally validate RNA expression changes, reverse transcription was performed using 0.2 µg of RNA and M-MLV reverse transcriptase (Promega). For TEs, cDNA synthesis was performed by random primers and for genic sequences (dT)18 oligo was used. qPCR was performed using GoTaq SybrGreen Master mix (Promega) on Bio-Rad C1000 machine. Oligonucleotides used for specific sequences amplification are listed in Table S6. Relative changes in gene expression were calculated using the 2^ΔΔCt method ([Winer et al. 1999](#_ENREF_35)). *Rp49* (also called *RpL32*) mRNA was used for normalization.

**Western blots and antibodies**

Western blotting were performed according to standard protocols. Mouse anti-PIWI antibody was a gift from the Siomi lab. Rabbit polyclonal antibody to PIWI was raised to the synthetic peptide that corresponds to N-terminus (CADDQGRGRRRPLNEDD). Immunizations and bleedings were performed by Cocalico Biologicals Inc., antibody was purified using the SulfoLink kit (Pierce). Mouse anti-α-Tubulin (E7A) antibody was purchased from Developmental Studies Hybridoma Bank. Rabbit antibody to dPABP1 was a kind gift from Nahum Sonenberg, rabbit anti-Larp antibody was kindly provided by David Glover. Guinea Pig anti-TJ antibody was a kind gift from Dorothea Godt.

**Recombinant GST-DmPIWI purification and EMSA**

The pGEX 6P-1-piwi vector (kindly provided by Siomi lab) containing GST-DmPIWI was transformed to BL21(DE3)Rosetta. Induction was performed by 0.1 mg IPTG for 14h at 16°C. Cells were lysed in a lysis buffer (50 mM KH2PO4 pH 8; 1M NaCl, 5 mM β-Mercaptoethanol, 3% Glycerol, 1 mM PMSF) using sonication (Qsonica, 50% power, 4 min, with 3 sec pulse/3 sec pause cycle), lysate was cleared and GST-DmPIWI was purified by GST resin column (GE Healthcare) according to manufacturer instructions. Resin was extensively washed with lysis buffer and elution was done using 10 mM L‑Reduced Glutathione (in 50 mM Tris-HCl pH8; 5 mM DTT). Recombinant protein was subjected to dialysis. Mobility shift essay was performed essentially as described ([Cho et al. 2012](#_ENREF_7)).

**Genomic DNA library construction, sequencing, and TE insertion analysis**

DNA was extracted from 5*106 cells using Proteinase K method. 8 ug of obtained DNA was subjected to fragmentation using Bioruptor sonicator (Diagenode); by 8 cycles (20 sec pulse and 90 sec pause) with power set to “High”. Fragmented DNA was used for library construction performed essentially as described ([Ensminger et al. 2012](#_ENREF_8)). After end repair and 3’-A tailing, we performed adaptor oligo duplex ligation (duplex of PE_Tdot_common_C* and barcoded linker, Table S6). Ligation products of size between 400 and 450 bp. were agarose gel purified and used for PCR amplification with primer oligos PE-POSTPCR_1 and PE-POSTPCR_2. Amplified libraries were gel purified and quantified on an Aligent Bioanalyzer. Single end 150 nucleotide sequencing run was performed on MiSeq version 3 at the NextGen Sequencing Core of Massachusetts General Hospital (MGH) Department of Molecular Biology.

A custom PERL script was written to parse the genome sequencing reads as they were being processed via SAMTools, Bowtie and BLAT commands. The pipeline to generate the Level 1 list of TE insertions is described above in Supplemental Text. We further processed this file by comparing each coordinate for a TE insertion to genome annotation files of the *D.melanogaster* Release 5/Dm3 reference genome from the UCSC Genome Browser to designate if TE insertion was in an exon, intron, UTR, or intergenic region. Counts of TE insertion reads were then determined for 5 kb windows in the genome to smooth out inconsequential base differences for what were essentially identical de novo TE insertions between cell lines. Counting of TE classes, calculation of the Coverage Ratios, and building of density and difference maps were accomplished on Microsoft Excel spreadsheets and SQL analysis with Microsoft Access.

**Bioinformatics analysis of CLIP-seq, RNA-seq, and Nascent-seq.**

All read data from this study has been deposited in the Small Reads Archive of the Gene Expression Omnibus under the accession number of GSE45112.

Reads were quality checked by FastQC ([Andrews 2010](#_ENREF_2)), sorted according to the barcode sequence in their 5' adaptor, and then adaptor sequences were trimmed by FASTX-Toolkit ([Hannon-Lab 2009](#_ENREF_11)). Reads were mapped tothe *D.melanogaster* Release 5/Dm3 reference genome by using Bowtie (allowing maximum 2 mismatches, ([Langmead et al. 2009](#_ENREF_17)). Structural RNAs were determined by cross-mapping to a custom database, and removed from subsequent analyses. TE reads mapping was performed against a list of *Drosophila* consensus TE sequences obtained from the Repbase database ([Kapitonov and Jurka 2008](#_ENREF_13)) and from FlyBase ([Kaminker et al. 2002](#_ENREF_12)), while virus sequences were obtained from Genbank. Within each dataset of mapped reads signal merge count for unique reads was obtained (read frequency information was dismissed to avoid jackpot effect). The basic processing pipeline is written in shell script (process-quick.sh).

To subtract the background signal based on transcript expression levels in the PIWI CLIP-seq, we implemented the noise filters previously described in ([Chi et al. 2009](#_ENREF_6); [Leung et al. 2011](#_ENREF_18)). For each gene the combined expression data from four mRNAseq experiments performed in this study were subjected to log10 transformation. To model the random association of RNA fragments during IP, the *in silico* CLIP algorithm broke each mRNA sequence into 50nt windows, and then calculating random CLIP association probabilities based on the log10 of transcript expression level. The calculated value was subtracted from experimentally merged CLIP counts, and final signals were quantified by RPMs. The C code for the simulation is called ngs_remove_clip_noise_by_mrna.c. The CLIP score was calculated as pseudo-count-adjusted ratio of average CLIP tags passing filter to average tags of CLIP experiment done in presence of blocking peptide. The top 50 genes with the highest PIWI CLIP-seq scores were picked for Motif analysis. Up to three highest peaks in the exon regions of each gene were selected and the sequences of 150 bps length around the peaks were retrieved for motif analysis. A set of 202 sequences of 150 bps each from genes without CLIP signal were used as the negative sample. Motif analysis was performed using MEME ([Bailey et al. 2009](#_ENREF_3)), GLAM2 ([Frith et al. 2008](#_ENREF_9)), and Weeder ([Pavesi and Pesole 2006](#_ENREF_21)).

Libraries obtained by RNA-seq were sorted according to barcodes in 5’-linker sequence, followed by trimming of linker sequences. RNA-seq reads were mapped with Bowtie to the exons of a RefSeq transcript gene list from the *D.melanogaster* Release 5/Dm3 reference genome. Repbase Release 19 was used for mapping reads to repetitive elements ([Kapitonov and Jurka 2008](#_ENREF_13)). Gene expression was quantified by RPKMs (reads per million per kilobase) and each gene’s RPKM value was further normalized to the RPKM value of *Rp49* (also known as *RpL32*). In addition, we conducted differential expression analysis using the Biocondcutor packages EdgeR ([Robinson et al. 2010](#_ENREF_27)) and DESeq ([Anders and Huber 2010](#_ENREF_1)) and followed the instructions provided in their respective vignette. For EdgeR, we used exact negative binomial testing procedure for differential expression. Although these packages offered statistical estimates of expression significance, they also yielded several different expression fold changes compared to the simple normalization process to *Rp49*, and we found empirically with several genes that RT-qPCR most frequently mirrored the gene expression changes from the simple normalization process compared to edgeR and DESeq, and edgeR had much better consistency with RT-qPCR than DESeq (data not shown).

Nascent RNA reads were merged and mapped to the *D.melanogaster* Release 5/Dm3 reference genome by using Bowtie (allowing maximum 2 mismatches). WIG files with step size of 50 bp were generated and viewed by UCSC Browser. Read counts for each gene were calculated by overlapping the RefSeq track of UCSC Browser to the genome, and nascent RNA gene counts included introns and exons reads within a transcript. The transcript isoform with the highest count was selected as representative for a gene. The C code for counting the nascent RNA reads for each gene interval is called ngs_genecentric.c.

To identify candidate lncRNAs from OSCs and OSS cell nascent RNA reads, we first attempted to define new transcript models with the Cufflinks v2.0.2 package ([Trapnell et al. 2012](#_ENREF_32)) and the Scripture package ([Guttman et al. 2010](#_ENREF_10)), utilizing the standard default parameters. Although transcript models were identified by both packages at lncRNAs loci, these models were frequently multiple shorter fragments that by inspection of the nascent RNA profiles would suggest were much longer contiguous transcripts. These multiple shorter fragments were also not discernable from the complex overlap of coding genes in the compact *Drosophila* genome; therefore we could not adapt a purely automated algorithm at this time to define lncRNA coordinates without too many false calls. Since our goal was directed at identifying novel transcripts associated with de novo TE insertions, we took a hybrid approach of combining an automated search with manual curation. Using the defined coordinates for de novo TE insertions, we measured the strand-specific nascent RNA counts in 5kb windows as well as tracked the annotations of genes orientations in these windows. We then sorted for windows where there were at least 10 RPMs of nascent reads not in the same strand as an annotated gene, yielding originally 273 and 364 lncRNA candidates for OSC_C and OSS_C datasets, respectively.

Using the TE insertion as an anchoring coordinate, we then manually inspected each lncRNA candidate in the *D.melanogaster* Release 5/Dm3 reference genome from the UCSC Genome Browser, noting the following conservative criteria for unambiguous lncRNA transcripts as defined by at least 10 RPMs of nascent RNA tags, being at least 1kb long, and were within 1kb or overlapping a *de novo* TE insertion. We were able to estimate general boundary coordinates for each lncRNA, collapse certain candidates into the same lncRNA that overlapped multiple TEs, and cull false positives that were either misrepresented by a nearby coding gene, a reference genome TE, or a structural RNA repeat. Manual curation resulted in a final list of 204 and 289 candidate lncRNAs in OSCs and OSS cells, respectively, and we estimate our initial algorithm presented a 25% and 21% FDR. We determined the coding probability for these candidate lncRNAs from OSC and OSS cells using the CPAT program ([Wang et al. 2013](#_ENREF_34)). For controls, we chose 200 randomly distributed entries from a *Drosophila* lncRNAs dataset ([Brown et al. 2014](#_ENREF_5)) and a set of 201 highly expressed protein coding genes from OSS cells that had similar length and chromosomal location distributions as the lncRNAs from OSCs and OSS cells.

**SUPPLEMENTAL REFERENCES**

Anders S, Huber W. 2010. Differential expression analysis for sequence count data. *Genome Biol* **11**(10): R106.

Andrews S. 2010. FastQC. <http://http://www.bioinformatics.babraham.ac.uk/projects/fastqc/>.

Bailey TL, Boden M, Buske FA, Frith M, Grant CE, Clementi L, Ren J, Li WW, Noble WS. 2009. MEME SUITE: tools for motif discovery and searching. *Nucleic acids research* **37**(Web Server issue): W202-208.

Brennecke J, Aravin AA, Stark A, Dus M, Kellis M, Sachidanandam R, Hannon GJ. 2007. Discrete small RNA-generating loci as master regulators of transposon activity in Drosophila. *Cell* **128**(6): 1089-1103.

Brown JB, Boley N, Eisman R, May GE, Stoiber MH, Duff MO, Booth BW, Wen J, Park S, Suzuki AM et al. 2014. Diversity and dynamics of the Drosophila transcriptome. *Nature*.

Chi SW, Zang JB, Mele A, Darnell RB. 2009. Argonaute HITS-CLIP decodes microRNA-mRNA interaction maps. *Nature* **460**(7254): 479-486.

Cho J, Chang H, Kwon SC, Kim B, Kim Y, Choe J, Ha M, Kim YK, Kim VN. 2012. LIN28A is a suppressor of ER-associated translation in embryonic stem cells. *Cell* **151**(4): 765-777.

Ensminger AW, Yassin Y, Miron A, Isberg RR. 2012. Experimental evolution of Legionella pneumophila in mouse macrophages leads to strains with altered determinants of environmental survival. *PLoS Pathog* **8**(5): e1002731.

Frith MC, Saunders NF, Kobe B, Bailey TL. 2008. Discovering sequence motifs with arbitrary insertions and deletions. *PLoS Comput Biol* **4**(4): e1000071.

Guttman M, Garber M, Levin JZ, Donaghey J, Robinson J, Adiconis X, Fan L, Koziol MJ, Gnirke A, Nusbaum C et al. 2010. Ab initio reconstruction of cell type-specific transcriptomes in mouse reveals the conserved multi-exonic structure of lincRNAs. *Nat Biotechnol* **28**(5): 503-510.

Hannon-Lab. 2009. FASTX-Toolkit: FASTQ/A short-reads pre-processing tools. <http://hannonlab.cshl.edu/fastx_toolkit/>.

Kaminker JS, Bergman CM, Kronmiller B, Carlson J, Svirskas R, Patel S, Frise E, Wheeler DA, Lewis SE, Rubin GM et al. 2002. The transposable elements of the Drosophila melanogaster euchromatin: a genomics perspective. *Genome Biol* **3**(12): RESEARCH0084.

Kapitonov VV, Jurka J. 2008. A universal classification of eukaryotic transposable elements implemented in Repbase. *Nat Rev Genet* **9**(5): 411-412; author reply 414.

Kent WJ. 2002. BLAT--the BLAST-like alignment tool. *Genome Res* **12**(4): 656-664.

Khodor YL, Rodriguez J, Abruzzi KC, Tang CH, Marr MT, 2nd, Rosbash M. 2011. Nascent-seq indicates widespread cotranscriptional pre-mRNA splicing in Drosophila. *Genes Dev* **25**(23): 2502-2512.

Khurana JS, Wang J, Xu J, Koppetsch BS, Thomson TC, Nowosielska A, Li C, Zamore PD, Weng Z, Theurkauf WE. 2011. Adaptation to P element transposon invasion in Drosophila melanogaster. *Cell* **147**(7): 1551-1563.

Langmead B, Trapnell C, Pop M, Salzberg SL. 2009. Ultrafast and memory-efficient alignment of short DNA sequences to the human genome. *Genome Biol* **10**(3): R25.

Leung AK, Young AG, Bhutkar A, Zheng GX, Bosson AD, Nielsen CB, Sharp PA. 2011. Genome-wide identification of Ago2 binding sites from mouse embryonic stem cells with and without mature microRNAs. *Nat Struct Mol Biol* **18**(2): 237-244.

Matts JA, Sytnikova Y, Chirn GW, Igloi GL, Lau NC. 2014. Small RNA library construction from minute biological samples. *Methods Mol Biol* **1093**: 123-136.

Niki Y. 2009. Culturing ovarian somatic and germline stem cells of Drosophila. *Curr Protoc Stem Cell Biol* **Chapter 2**: Unit 2E 1.

Pavesi G, Pesole G. 2006. Using Weeder for the discovery of conserved transcription factor binding sites. *Curr Protoc Bioinformatics* **Chapter 2**: Unit 2 11.

Pennington KL, Marr SK, Chirn GW, Marr MT, 2nd. 2013. Holo-TFIID controls the magnitude of a transcription burst and fine-tuning of transcription. *Proc Natl Acad Sci U S A*.

Perrat PN, DasGupta S, Wang J, Theurkauf W, Weng Z, Rosbash M, Waddell S. 2013. Transposition-driven genomic heterogeneity in the Drosophila brain. *Science* **340**(6128): 91-95.

Post C, Clark JP, Sytnikova YA, Chirn GW, Lau NC. 2014. The capacity of target silencing by the Drosophila Piwi protein and piRNAs. *RNA* **In Press.**

Rapaport F, Khanin R, Liang Y, Pirun M, Krek A, Zumbo P, Mason CE, Socci ND, Betel D. 2013. Comprehensive evaluation of differential gene expression analysis methods for RNA-seq data. *Genome Biol* **14**(9): R95.

Robine N, Lau NC, Balla S, Jin Z, Okamura K, Kuramochi-Miyagawa S, Blower MD, Lai EC. 2009. A broadly conserved pathway generates 3' UTR-directed primary piRNAs. *Current Biology* **19**(22).

Robinson MD, McCarthy DJ, Smyth GK. 2010. edgeR: a Bioconductor package for differential expression analysis of digital gene expression data. *Bioinformatics* **26**(1): 139-140.

Saito K, Inagaki S, Mituyama T, Kawamura Y, Ono Y, Sakota E, Kotani H, Asai K, Siomi H, Siomi MC. 2009. A regulatory circuit for piwi by the large Maf gene traffic jam in Drosophila. *Nature* **461**(7268): 1296-1299.

Saito K, Nishida KM, Mori T, Kawamura Y, Miyoshi K, Nagami T, Siomi H, Siomi MC. 2006. Specific association of Piwi with rasiRNAs derived from retrotransposon and heterochromatic regions in the Drosophila genome. *Genes Dev* **20**(16): 2214-2222.

Sambrook J, Russell DW. 2006. *The condensed protocols from Molecular cloning : a laboratory manual*. Cold Spring Harbor Laboratory Press, Cold Spring Harbor, N.Y.

Sienski G, Donertas D, Brennecke J. 2012. Transcriptional silencing of transposons by Piwi and maelstrom and its impact on chromatin state and gene expression. *Cell* **151**(5): 964-980.

Trapnell C, Roberts A, Goff L, Pertea G, Kim D, Kelley DR, Pimentel H, Salzberg SL, Rinn JL, Pachter L. 2012. Differential gene and transcript expression analysis of RNA-seq experiments with TopHat and Cufflinks. *Nat Protoc* **7**(3): 562-578.

Tupy JL, Bailey AM, Dailey G, Evans-Holm M, Siebel CW, Misra S, Celniker SE, Rubin GM. 2005. Identification of putative noncoding polyadenylated transcripts in Drosophila melanogaster. *Proc Natl Acad Sci U S A* **102**(15): 5495-5500.

Wang L, Park HJ, Dasari S, Wang S, Kocher JP, Li W. 2013. CPAT: Coding-Potential Assessment Tool using an alignment-free logistic regression model. *Nucleic acids research* **41**(6): e74.

Winer J, Jung CK, Shackel I, Williams PM. 1999. Development and validation of real-time quantitative reverse transcriptase-polymerase chain reaction for monitoring gene expression in cardiac myocytes in vitro. *Anal Biochem* **270**(1): 41-49.

Wu Q, Luo Y, Lu R, Lau N, Lai EC, Li WX, Ding SW. 2010. Virus discovery by deep sequencing and assembly of virus-derived small silencing RNAs. *Proc Natl Acad Sci U S A* **107**(4): 1606-1611.

Young RS, Marques AC, Tibbit C, Haerty W, Bassett AR, Liu JL, Ponting CP. 2012. Identification and properties of 1,119 candidate lincRNA loci in the Drosophila melanogaster genome. *Genome Biol Evol* **4**(4): 427-442.
