# Supplementary material for: Transposable element dynamics and PIWI regulation impacts lncRNA and gene expression diversity in Drosophila ovarian cell cultures
Source: HighWire-hosted journal article supplement (doi:10.1101/gr.178129.114), 2014-09-29
Supplement: Supplemental_Tables_S1_S6.zip [file TableS1_IlluminaStats_0925.pdf › TableS1_IlluminaStats_0925.pdf]

Table S1. Illumina sequencing statistics of OSS/OSC genomes.

Illumina sequencing statistics of PIWI-CLIP-Seq from OSS current cells

| Sample                    | total_read | read_clipped | read_noclippped | read_merged_clipped | read_merged_noclip | virus   | mirna     | struc     | genome_mapped | no_genome_ma | normalization_base |
|---------------------------|------------|--------------|-----------------|---------------------|--------------------|---------|-----------|-----------|---------------|--------------|--------------------|
| clip-piwi-SiomiAb1-merged | 23,476,841 | 6,682,690    | 14,653,952      | 839,534             | 1,698,342          | 40,522  | 383       | 390,807   | 1,333,090     | 581,081      | 2,537,876          |
| clip-piwi-LauAb1-merged   | 6,242,340  | 6,365        | 6,204,650       | 2,399               | 1,733,189          | 16,280  | 453       | 222,496   | 796,455       | 699,603      | 1,735,588          |
| clip-piwi-LauAb2-merged   | 18,674,490 | 8,152,133    | 5,797,240       | 1,867,114           | 1,095,822          | 15,606  | 625       | 414,170   | 1,558,951     | 533,775      | 2,962,936          |
| clip-piwi-LauAb3-merged   | 31,600,452 | 8,185,739    | 12,825,412      | 2,585,416           | 3,106,201          | 59,764  | 746       | 643,684   | 2,649,889     | 1,499,472    | 5,691,617          |
| clip-piwi-block-merged    | 21,417,460 | 4,156,343    | 15,886,908      | 281,869             | 808,714            | 50,959  | 52        | 238,795   | 201,052       | 441,072      | 1,090,583          |
| s_2678_OSSpiRNAs          | 24,742,206 | 12,137,524   | 9,071,006       | NA                  | NA                 | 561,839 | 3,767,257 | 6,631,212 | 2,804,671     | 8,498,171    | 21,208,530         |

Illumina sequencing statistics of transcriptome analysis from OSS current cells

| Sample                | total_read | read_clipped | read_noclippped | read_merged_clipped | read_merged_noclip | virus     | mirna | struc      | genome_mapped | no_genome | normalization_base |
|-----------------------|------------|--------------|-----------------|---------------------|--------------------|-----------|-------|------------|---------------|-----------|--------------------|
| cytosigfp             | 10,527,901 | 537,573      | 9,671,574       | NA                  | NA                 | 320,496   | 19    | 4,368,380  | 3,048,856     | 1,990,615 | 3,048,856          |
| cytosipiwi            | 20,778,591 | 1,368,336    | 18,636,199      | NA                  | NA                 | 1,416,842 | 44    | 9,380,971  | 4,438,336     | 3,500,146 | 4,438,336          |
| nucpsigfp             | 14,837,283 | 853,516      | 13,460,845      | NA                  | NA                 | 370,465   | 110   | 5,149,984  | 5,838,133     | 2,192,292 | 5,838,133          |
| nucpsipiwi            | 11,956,880 | 705,852      | 10,796,802      | NA                  | NA                 | 725,781   | 81    | 3,376,659  | 4,794,071     | 1,983,427 | 4,794,071          |
| nunsigfp              | 12,825,174 | 919,402      | 11,402,711      | NA                  | NA                 | 3,677,831 | 63    | 1,777,754  | 2,088,180     | 3,954,654 | 2,088,180          |
| nunsipiwi             | 15,898,679 | 973,834      | 14,351,086      | NA                  | NA                 | 4,427,631 | 83    | 2,772,630  | 2,317,239     | 4,983,407 | 2,317,239          |
| Nun-siGFP             | 8,993,754  | 202,168      | 8,666,340       | NA                  | NA                 | 3,305,067 | 62    | 1,466,198  | 1,723,642     | 2,252,551 | 1,723,642          |
| Nun-siPiwi            | 12,263,998 | 300,343      | 11,767,991      | NA                  | NA                 | 4,172,796 | 84    | 2,433,336  | 2,029,464     | 3,270,613 | 2,029,464          |
| osssigfp              | 15,411,852 | 90,209       | 14,970,932      | NA                  | NA                 | 221,322   | 163   | 2,400,857  | 10,616,075    | 1,792,092 | 10,616,075         |
| osssipiwi             | 16,004,346 | 161,222      | 15,409,119      | NA                  | NA                 | 421,131   | 129   | 2,095,834  | 10,392,526    | 2,555,092 | 10,392,526         |
| mRNA-siGFP-scriptseq  | 10,605,545 | 148,270      | 10,382,040      | NA                  | NA                 | 9,883     | 25    | 6,749,003  | 2,394,291     | 1,257,565 | 2,394,291          |
| mRNA-siPiwi-scriptseq | 15,221,965 | 275,028      | 14,828,175      | NA                  | NA                 | 29,716    | 24    | 10,320,470 | 2,866,405     | 1,647,154 | 2,866,405          |
| mRNA-siGFP-srna       | 22,206,242 | 11,310,695   | 5,949,031       | NA                  | NA                 | 136,257   | 92    | 3,607,946  | 5,189,007     | 3,118,137 | 5,189,007          |
| mRNA-siPiwi-srna      | 23,436,134 | 10,188,876   | 6,775,155       | NA                  | NA                 | 502,124   | 77    | 3,682,345  | 4,322,562     | 3,637,516 | 4,322,562          |
| siGFP0125             | 7,669,226  | 232,096      | 5,584,328       | NA                  | NA                 | 28,560    | 122   | 1,140,946  | 2,587,308     | 2,059,610 | 2,587,308          |
| siPiwi0125            | 5,743,894  | 195,892      | 3,680,964       | NA                  | NA                 | 46,075    | 132   | 565,009    | 1,820,743     | 1,445,029 | 1,820,743          |

Illumina sequencing statistics of OSS/OSC genomes.

|                                         | OSS-Early  | OSS_E | OSS-Current | OSS_C | OSC-Early  | OSC_E | OSC-Current | OSC_C |
|-----------------------------------------|------------|-------|-------------|-------|------------|-------|-------------|-------|
| Unique gSeq reads:                      | 24,006,273 |       | 29,031,323  |       | 21,970,145 |       | 52,124,387  |       |
| Genome sequencing total reads           | 26,568,468 |       | 33,718,485  |       | 24,627,215 |       | 65,749,243  |       |
| Rel. 5/Dm3 Reference genome matched     | 18,242,228 | 69%   | 22,661,533  | 67%   | 16,205,806 | 66%   | 49,469,969  | 75%   |
| RepeatMasker matched reads              | 1,763,174  | 7%    | 3,095,136   | 9%    | 1,494,470  | 6%    | 5,854,087   | 9%    |
| Remaining nonmapping reads              | 6,563,066  | 25%   | 7,961,816   | 24%   | 6,926,939  | 28%   | 10,425,187  | 16%   |
| Reads with 1 Genome and 1 TE match      | 33,729     | 0.13% | 71,255      | 0.21% | 27,382     | 0.11% | 51,654      | 0.08% |
| uniqueied reads:                        | 32,383     |       | 69,288      |       | 26,368     |       | 47,019      |       |
| Level 1 clusters of TE insertion sites: | 1,196      |       | 2,847       |       | 1,143      |       | 1,152       |       |
