# Supplementary material for: Transposable element dynamics and PIWI regulation impacts lncRNA and gene expression diversity in Drosophila ovarian cell cultures
Source: HighWire-hosted journal article supplement (doi:10.1101/gr.178129.114), 2014-09-29
Supplement: Supplemental_Tables_S1_S6.zip [file TableS2_OSS_TEsGenes_CLIPmRNASeq_0922.xlsx]

## Sheet: TEs_PiwiCLIP_andExpression
Table S2. PIWI CLIP and Expression analysis of TEs and Genes in OSS_C cells. Tab: TEs
Transposon	Length		Plus Strand PIWI CLIP Score	Minus Strand PIWI CLIP Score		OSS piRNAs(+)	OSS piRNAs (-)	Total piRNAS		4 Lib siPiwi KD ratio	StDev	Significance		Cyto siPiwi KD ratio	Nucplsm siPiwi KD ratio	NUN siPiwi KD ratio
5S_DM=135	135		1.82604	1.82604		425.874	12.4481	438.323		1.89963	2.01905	0		0.784914	1.48438	1.18824
ACCORD=558-6846	6846		2.09481	-2.09481		0.51867	24.6132	25.1319		2.30468	1.34436	1		4.74219	1.40903	2.63207
ACCORD2=215-7427	7427		7.60041	-7.60041		0.518669	2.26329	2.78195		1.48999	0.84884	1		4.1426	0.772857	3.89543
ALA_DM=52	52		0	0		0	0	0		0	0	0		0	0	0
ALUII_DM=240	240		0	0		0	1.08449	1.08449		0	0	0		0	0	1.77374
ARS406_DM=353	353		0	0		0.518669	0.282911	0.80158		0	0	0		0	0	1.14401
BAGGINS1=5453	5453		9.35125	-9.35125		3.58353	194.265	197.849		0	0	0		1.30819	1.8892	1.47583
BARI_DM=1728	1728		-0.608233	-0.608233		5.5639	16.5031	22.067		0	0	0		0	0.314867	3.63899
BATUMI=272-8235	8235		8.67298	-8.67298		6.50694	64.645	71.152		1.12444	0.517499	1		4.57867	1.06268	1.4482
BEL=361-5765	5765		2.72281	-2.72281		82.4212	51.1596	133.581		1.56352	0.601002	1		4.23906	0.630851	1.76069
Bica=164-4943	4943		9.88726	-9.88726		0.141456	2.07468	2.21613		0.395261	0.327715	0		1.30819	0.601111	0.965705
BLASTOPIA=275-4756	4756		7.3184	-7.3184		366.039	609.625	975.664		1.33647	1.22769	0		11.3377	2.54582	1.30718
BLOOD=399-7012	7012		3.85519	-3.85519		128.63	6291.55	6420.18		8.71774	2.61582	1		12.2232	6.43672	3.61582
BS=5126	5126		5.76895	-5.76895		164.088	4.76232	168.85		0.771081	0.13145	1		3.48851	0.472301	0.994021
BS2=4721	4721		6.09869	-6.09869		11.8822	1.22595	13.1082		0.941813	0.359948	1		2.88892	0.988882	1.12131
BS3_DM=1790	1790		2.50479	-2.50479		0.612973	1.69746	2.31043		0	0	0		3.40129	0.604546	1.07797
BS4_DM=754	754		0	0		0	0	0		0	0	0		0	0	0
BURDOCK=275-6135	6135		9.32528	-9.32528		2.26329	2.68765	4.95094		0.845636	0.111847	1		2.61638	0.80966	1.41295
Chimpo=207-4266	4266		3.10904	-3.10904		21.9727	0.282912	22.2556		1.74866	1.29293	1		4.55531	0.677543	1.34689
Chouto=618-6333	6333		4.37708	-4.37708		5.79966	7.26137	13.061		0	0	0		14.3901	0.314868	3.84337
CIRCE=6356	6356		14.2788	14.2788		0.660128	2.6405	3.30063		0.835065	0.327179	1		1.64719	0.648381	1.51028
COPIA=276-4870	4870		4.30062	4.30062		5263.93	433.89	5697.82		1.39876	0.544345	1		5.03403	0.618362	1.20979
Copia1=203-4327	4327		2.37937	-2.37937		472.13	119.577	591.707		0.613379	0.36499	1		5.23276	1.50168	0.85189
COPIA2=198-4360	4360		4.56891	-4.56891		0.707276	88.2209	88.9282		8.59726	12.0931	0		6.99064	3.3608	4.11681
DIVER=224-5867	5867		2.8001	-2.8001		110.382	26.9708	137.353		1.73781	1.65706	0		2.48686	0.716574	1.19818
DIVER2=385-4532	4532		12.072	-12.072		58.421	5.89397	64.315		0.426447	0.353386	0		3.92457	0.472302	0.87264
DM1731=336-4313	4313		12.7635	-12.7635		232.269	73.8868	306.156		0	0	0		2.14543	0.74704	0.950478
DM176=7439	7439		-19.438	-19.438		881.596	4178.92	5060.51		4.46948	5.59765	0		12.5913	4.08686	2.38569
DM297=414-6581	6581		2.76317	-2.76317		306.863	6124.73	6431.59		6.74214	7.314	0		10.8596	6.21655	3.11671
DM412=481-6958	6958		-7.79934	-7.79934		21.124	53346	53367.1		12.0934	6.98509	1		15.4139	8.09952	5.56121
DM412B_LTR=571	571		0	0		3.06486	3844.38	3847.44		26.3039	19.7369	1		15.1981	6.61223	3.26171
DMCR1A=4470	4470		6.69428	-6.69428		179.554	32.8648	212.419		1.9984	2.38412	0		0	0.901667	2.74282
DMHMR1=965	965		-0.331529	-0.331529		0.707276	0.943036	1.65031		1.38419	0.973582	1		0	0.314868	1.02594
DMHMR2=1212	1212		0.517895	-0.517895		0.235759	0.047152	0.282911		0	0	0		1.96229	0.472302	2.05611
DMLTR5=266	266		0	0		5.32815	126.037	131.365		1.64806	0.828004	1		5.88686	1.62944	2.00912
DMRP1=346	346		0	0		0.188606	0.518669	0.707275		0	0	0		0	0	0.678057
DMRPR=285	285		0	0		0.047152	0.330061	0.377213		0	0	0		0	0.944602	0
DMRT1A=5183	5183		4.76851	-4.76851		5.89397	1.93322	7.82719		1.15671	0.767101	1		4.4989	1.22169	1.32364
DMRT1B=5183	5183		7.13096	-7.13096		18.2949	13.6269	31.9217		0.825283	0.169288	1		1.02039	0.760931	1.07082
DMRT1C=5443	5443		3.71723	-3.71723		1.13165	0.612974	1.74462		0	0	0		3.92457	0.944602	4.36162
DMSAT6=470	470		0	0		0.094304	0	0.094304		0	0	0		0	0	0
DMTOM1_LTR=410	410		0	0		3.91359	0.707274	4.62087		0.949434	0.460179	1		1.84853	0.757072	1.37535
DNAREP1_DM=594	594		0.178521	-0.178521		357.552	9.76041	367.312		0.938337	0.579467	1		2.66483	0.738311	1.13511
DOC=4725	4725		4.46237	-4.46237		1509	1831.61	3340.61		1.17002	0.950657	0		3.10228	1.27598	1.00659
DOC2_DM=4793	4793		10.6761	-10.6761		2.82911	7.30851	10.1376		0.896273	0.344703	1		1.14467	0.85873	1.12495
DOC3_DM=4740	4740		8.12817	-8.12817		2.6405	13.4854	16.1259		0.923143	0.61244	1		1.94461	0.665001	1.02293
DOC4_DM=2791	2791		23.8671	-23.8671		0.660125	0.094304	0.754429		0	0	0		0	0	0.954832
DOC5_DM=4682	4682		2.60664	-2.60664		0.424366	2.02753	2.45189		0.597512	0.480395	0		0.436064	5.66761	1.42474
DOC6_DM=4222	4222		4.61939	-4.61939		13.9098	59.7412	73.651		2.15857	0.821324	1		4.50859	1.12012	1.37989
FB4_DM=4089	4089		1.90762	-1.90762		734.671	741.225	1475.9		1.77741	1.5083	0		2.64922	0.776976	1.50469
FROGGER=203-2280	2280		-2.01056	-2.01056		0	0.754428	0.754428		0	0	0		0	0	0
FTZ_DM=72	72		0	0		0	0	0		0	0	0		0	0	0
FUSHI_DM=157	157		0	0		0	0	0		0	0	0		0	0	0
FW=4692	4692		5.34674	-5.34674		2063.83	2619.28	4683.11		1.02494	0.669455	1		2.74217	1.09826	1.06448
FW2_DM=3961	3961		2.81058	-2.81058		1.65031	0.188608	1.83892		0.840018	0.95046	0		0	0	1.29343
FW3_DM=3132	3132		3.50818	-3.50818		0.141455	4.38511	4.52656		0	0	0		0	0	0.845179
G_DM=4346	4346		6.54305	-6.54305		0.330064	1.46171	1.79177		0	0	0		4.36063	0	8.12262
G2_DM=3102	3102		3.74725	-3.74725		1.60316	6.78985	8.39301		0.935343	0.493134	1		2.61638	0.914132	1.49784
G3_DM=4605	4605		4.09669	-4.09669		0.330062	1.60316	1.93322		0.688719	1.04305	0		0.327048	0.944602	1.13933
G4_DM=3856	3856		14.5036	-14.5036		8.86453	13.2496	22.1142		0.475388	0.323967	1		2.61638	0.674717	0.826423
G5_DM=4856	4856		8.38392	-8.38392		4.57372	1.13164	5.70536		0.820009	0.431518	1		0.436064	0.519532	0.89452
G5A_DM=2841	2841		14.0175	-14.0175		3.20632	1.98037	5.18669		0.962743	0.339939	1		1.64362	0.769677	1.49694
G6_DM=2042	2042		2.72335	-2.72335		0.471519	394.141	394.613		0.899441	0.37014	1		1.30819	5.66761	1.32972
G7_DM=1192	1192		0	0		0	0	0		0	0	0		0	0	0
GTWIN=495-6916	6916		-11.0806	-11.0806		45.4543	24001.2	24046.7		8.67016	7.54371	0		29.6523	9.88034	14.8844
GYPSY=482-6989	6989		-8.4672	-8.4672		10455.7	3346.22	13801.9		12.4621	12.2807	0		45.9406	13.8503	5.91057
Gypsy1=408-7135	7135		6.40296	6.40296		2495.88	1173.89	3669.77		2.7653	0.919697	1		4.09444	0.808645	1.729
GYPSY10=364-5642	5642		6.52826	-6.52826		1.79177	2413.56	2415.35		0.985787	0.572824	1		0	1.4169	1.00963
GYPSY11=452-3976	3976		9.87009	-9.87009		0.565821	23.1987	23.7645		0	0	0		0	0	1.18496
GYPSY12=2336-7882	7882		4.09809	-4.09809		47.2932	17.1161	64.4093		0.875114	0.456327	1		2.11491	0.95262	1.00835
GYPSY12A_LTR=2280	2280		1.37582	-1.37582		1.83892	0.377215	2.21613		0.540918	0.452941	0		0	0.314867	1.69913
Gypsy2=338-6883	6883		7.88544	-7.88544		38.7587	2322.22	2360.98		3.57848	5.16382	0		5.37812	3.90436	1.58858
GYPSY2=353-6488	6488		-10.77	-10.77		17.1161	2876.26	2893.37		4.99591	7.96635	0		0	21.7258	4.12777
GYPSY3=398-6575	6575		7.30215	-7.30215		688.227	796.11	1484.34		3.38946	4.08575	0		11.7737	0.537698	1.85605
GYPSY4=287-6575	6575		6.33577	-6.33577		2.45189	3791.99	3794.44		1.53233	1.48751	0		18.6417	1.76326	2.02582
GYPSY5=430-6939	6939		-9.65764	-9.65764		0.848735	10306.2	10307.1		0	0	0		0	18.8921	4.04318
GYPSY6=407-7419	7419		7.32263	-7.32263		2794.26	4062.17	6856.43		2.24929	2.10016	0		4.18621	1.04404	1.6095
GYPSY6A_LTR=420	420		0	0		45.9729	332.09	378.063		0.864342	1.30322	0		0	0	1.25922
GYPSY7=251-5235	5235		-8.68369	-8.68369		0.141456	0.754431	0.895887		0	0	0		0	0	2.32276
GYPSY8=304-4651	4651		4.70801	-4.70801		0.188607	0.330064	0.518671		1.16482	0.270046	1		0	0.393584	0.768022
GYPSY9=336-5013	5013		-10.7175	-10.7175		0.612972	1.2731	1.88607		0	0	0		0	0	0.865758
HELENA_RT=1317	1317		0	0		0.330063	259.806	260.136		0	0	0		0	0	0.352285
HELITRON1_DM=564	564		0	0		0	0	0		0	0	0		0	0	0
HETA=6081	6081		2.4682	2.4682		5.70536	2.40474	8.1101		1.34875	1.20656	0		2.73871	0.582064	1.18555
HETRP_DM=1872	1872		2.8688	-2.8688		0.330062	16.173	16.5031		0	0	0		1.30819	0	1.30771
HMSBEAGLE_I=6529	6529		3.15242	-3.15242		100.669	3721.07	3821.74		2.4261	2.52995	0		3.71802	1.6341	1.65853
HOBO=3016	3016		5.06395	-5.06395		13.2968	7.26137	20.5582		1.18542	0.570558	1		2.47868	0.699156	1.14699
I_DM=5374	5374		3.7577	-3.7577		32.2518	159.326	191.578		1.56721	0.93018	1		5.23276	0.62258	0.863837
IDEFIX=594-6816	6816		-23.487	-23.487		1.08449	7019.05	7020.14		1.17818	1.48817	0		3.27048	1.11635	2.25147
INVADER1=423-3609	3609		6.98683	-6.98683		56.5349	4.43226	60.9672		2.79545	1.94443	1		2.32069	1.46805	1.71638
INVADER2=266-4858	4858		4.21336	-4.21336		6.83701	5.13954	11.9765		0.574657	0.146795	1		0.654095	0.562264	1.69942
INVADER3=298-5186	5186		6.81585	-6.81585		8.34586	3.81929	12.1651		0	0	0		0.373769	0.629735	2.90341
INVADER4=346-2759	2759		5.73797	-5.73797		115.097	15.8901	130.988		2.75668	2.13668	1		3.82676	1.48607	2.06982
INVADER5=352-3686	3686		-44.6346	-44.6346		0.471519	3.86644	4.33796		0	0	0		0	0	2.41426
INVADER6=393-4492	4492		18.7477	18.7477		2.16898	0.943039	3.11202		1.31749	1.26137	0		4.23604	0.784358	1.11637
IVK_DM=5402	5402		13.1224	-13.1224		33.7606	48.4248	82.1855		1.24494	0.741645	1		2.53462	0.472302	1.18078
Jockey=5020	5020		4.51125	-4.51125		98.5	203.13	301.63		1.38282	0.791497	1		4.523	1.93849	1.64802
JOCKEY2=3428	3428		8.57782	-8.57782		1.65031	396.593	398.244		0.146913	0.170299	0		0	0.290647	1.28083
LOOPER1_DM=1881	1881		4.48949	-4.48949		0.141456	2.07468	2.21613		0.61611	0.408381	1		7.84914	0.682214	1.22614
LTRMDG3_DM=267	267		0.049009	-0.049009		4.90378	10.0433	14.9471		2.34199	0.858599	1		3.71337	1.51046	1.3633
M4DM=1435	1435		-2.43199	-2.43199		20.8411	8.34585	29.1869		0.734838	0.36098	1		2.61638	0.706468	1.35019
MARINER2_DM=912	912		-1.32554	-1.32554		0.471518	3.06486	3.53638		1.40975	1.33952	0		1.96229	1.25947	2.19304
MAX=321-8235	8235		-24.1223	-24.1223		2.54619	5.75251	8.29871		1.09871	0.478026	1		1.24053	0.676541	1.7561
MDG1=442-7038	7038		4.42269	4.42269		37.0141	27903.6	27940.6		16.3672	20.1563	0		2.00982	0.914526	1.3012
MDG3_DM=4986	4986		2.89188	-2.89188		48.6134	199.593	248.207		2.44099	0.539327	1		4.60679	1.46729	1.5963
MICROPIA=476-4952	4952		3.29291	-3.29291		2.97056	8.25155	11.2221		1.06079	0.201506	1		3.36859	1.26528	1.86912
NOMAD=518-7090	7090		6.24804	-6.24804		93.0775	194.077	287.154		1.45303	0.48182	1		2.78645	0.91187	1.93691
NTS_DM=240	240		0	0		23.293	6.7427	30.0357		1.76469	1.25794	1		1.04655	1.88921	1.18409
PEN1=465	465		0.141037	-0.141037		0.377215	0.094304	0.471519		0.824363	0.379303	1		2.18862	0.675647	1.1935
PEN2=213	213		0	0		0.141455	0	0.141455		0.978098	0.719525	1		1.13756	0.736791	0
PEN4=150	150		0	0		0.047152	0	0.047152		0	0	0		3.92457	0.472302	1.30115
PLACW_DM=930	930		0	0		0.047152	4.95093	4.99808		0	0	0		0	0	0
POGO=2121	2121		6.51918	-6.51918		22.7271	23.9059	46.6331		1.14881	0.266295	1		2.1008	1.08759	1.21936
POGON1=186	186		0	0		6.12973	1.69746	7.82719		1.79651	1.58835	0		4.12583	0.571734	0.790037
PROTOP_A=1105	1105		1.0157	-1.0157		87.6079	79.875	167.483		0.883421	0.198877	1		2.98536	0.925521	1.26661
PROTOP_B=1153	1153		1.37514	-1.37514		68.6529	53.0457	121.699		0.992042	0.45841	1		4.2049	0.78717	1.28872
PROTOP=4480	4480		8.34106	-8.34106		93.4547	91.0972	184.552		0.818688	0.33064	1		2.64611	0.974433	1.23179
QUASIMODO=658-6718	6718		4.55148	-4.55148		45.7372	3494.89	3540.62		5.35496	3.88778	1		11.918	6.20769	5.11044
QUASIMODO2=498-5954	5954		-12.2224	-12.2224		3.53638	39.7489	43.2853		1.09899	0.430079	1		2.28933	1.13352	0.751858
R1_DM=5356	5356		1.6839	1.6839		6.64839	4.76232	11.4107		1.22592	0.79079	1		1.69417	1.05501	1.97522
R1-2_DM=3216	3216		-5.57364	-5.57364		0.047152	0.377214	0.424366		0	0	0		0	0	0
R2_DM=3607	3607		1.44925	1.44925		1.32025	0.094304	1.41456		0.953137	0.524633	1		2.24845	1.29761	2.15149
ROO=428-8684	8684		5.72285	-5.72285		415.69	8009.1	8424.79		0.968447	0.438272	1		3.31528	1.37019	1.26461
ROOA=386-7235	7235		9.70669	-9.70669		7.68573	357.363	365.049		0.684636	0.487029	1		1.30819	1.10204	1.03104
ROVER_DM=7318	7318		4.20583	-4.20583		676.062	10964.7	11640.7		1.10188	0.615471	1		3.13966	0.753673	0.659234
RSP=118	118		0	0		0	0	0		0	0	0		0	0	0
S_DM=1736	1736		7.07459	-7.07459		7.82719	9.19459	17.0218		0	0	0		6.54096	0.661223	1.41373
S2_DM=1735	1735		1.63911	-1.63911		1.03734	1.83892	2.87626		0	0	0		1.30819	0	0.288586
SAR_DM=1472	1472		-0.852429	-0.852429		3.20632	1.88607	5.09239		0	0	0		0	0	0
SAR2_DM=646	646		0	0		0.801579	2.6405	3.44208		0	0	0		0	0.944602	0.870448
SPRINGER_LTR=7541	7541		4.30487	-4.30487		2837.12	1309.69	4146.81		2.59112	0.652747	1		3.53204	0.848441	1.74768
STALKER2=424-7826	7826		-11.079	-11.079		215.153	7354.16	7569.32		12.2124	17.1563	0		23.9399	16.758	5.75561
STALKER3_LTR=372	372		0	0		0.565821	284.608	285.174		0	0	0		0	0	0
STALKER4=402-6932	6932		6.1599	-6.1599		913.659	14650.7	15564.4		3.97248	5.33377	0		7.35857	4.60243	2.30539
TABOR=506-6842	6842		3.73565	-3.73565		3.72499	8824.87	8828.6		12.9757	8.42807	1		16.4765	9.12194	5.3874
TAHRE=10463	10463		3.01722	-3.01722		11.3164	1.93322	13.2496		1.45779	1.35015	0		2.66098	0.625347	1.0389
TART_B1=10654	10654		3.29004	-3.29004		57.6194	504.005	561.624		0.988709	0.299821	1		2.21752	0.824367	1.24387
TART=14477	14477		3.5909	-3.5909		67.5684	285.928	353.497		1.07369	0.570212	1		1.98792	0.759163	1.09703
TC1_DM=1666	1666		2.4059	-2.4059		1.3674	7.40282	8.77022		0.346906	0.524105	0		2.61638	0.755682	1.41844
TC1-2_DM=1644	1644		1.11541	-1.11541		2.59335	20.2281	22.8214		0.843251	0.44607	1		5.23276	0.742188	1.19356
TIRANT=417-8109	8109		6.46135	-6.46135		0.424367	3.44208	3.86645		0.968907	0.40427	1		1.90842	0.61345	0.99028
TLD1=196	196		0	0		0	0.047152	0.047152		0	0	0		0	0	0
TLD2=218	218		0	0		43.0495	125.754	168.803		0	0	0		0	0	0
TLD3=172	172		0	0		0.235759	0	0.235759		0	0	0		0	0	0
Transib1=3014	3014		6.3276	-6.3276		0.377216	0.377214	0.75443		0.405299	0.469402	0		0.619669	0.24858	0.637474
TRANSIB2=2844	2844		5.47911	-5.47911		0.990188	4.95093	5.94112		0.789753	0.652998	0		2.4295	0.551019	1.06016
TRANSIB3=2883	2883		4.09395	-4.09395		8.95883	0.895884	9.85472		1.12763	0.62054	1		3.17703	0.566762	1.57807
Transib4=2610	2610		8.14383	-8.14383		1.03734	8.53446	9.5718		0.660546	0.315302	1		0	1.8892	0.817742
Transib5=3001	3001		4.54153	-4.54153		0.707276	5.42245	6.12973		0	0	0		3.72331	0.601111	0.918832
Transib-N1_DM=514	514		0	0		0.047152	0.28291	0.330062		0	0	0		0	0	0
TRANSPAC=330-4920	4920		10.882	-10.882		347.225	127.263	474.488		0.618442	0.40871	1		4.67211	0.795456	0.817847
virus@American_nodavirus_RNA1=3107	3107		0.390834	-0.390834		1424.03	254.242	1678.27		0	0	0		0.961411	0.357774	0.796665
virus@American_nodavirus_RNA2=1416	1416		0.488372	0.488372		241.04	77.376	318.416		0	0	0		0.928016	0.524282	0.812705
virus@birnavirus_a=3260	3260		2.22252	2.22252		856.37	928.465	1784.83		0.526713	0.385453	1		0.929316	0.275011	0.813777
virus@birnavirus_b=3014	3014		0.511375	-0.511375		1708.17	1133.2	2841.36		0.459414	0.278692	1		0.998001	0.346355	0.806894
virus@Black_beetle_virus_RNA2=1399	1399		0.275001	-0.275001		9.76041	2.12183	11.8822		0	0	0		0	0	0
virus@Black_beetle_virus=3106	3106		0.761678	0.761678		453.364	66.9555	520.319		0	0	0		0.932528	0.366294	0.718374
virus@C_virus=9264	9264		0.0664887	-0.0664887		7828.23	1798.74	9626.97		5.39477	3.62852	1		16.5284	2.06641	2.71977
virus@Cricket_virus=9185	9185		-1.41538	-1.41538		2.7348	1.2731	4.0079		0	0	0		0	0	0
virus@Flock_house_virus_RNA1=3107	3107		0.79914	0.79914		445.961	63.2776	509.239		0	0	0		0.950515	0.368872	0.72431
virus@Flock_house_virus_TNCL_RNA1=3107	3107		0.36654	-0.36654		717.555	136.174	853.729		0	0	0		0.9349	0.377629	0.799015
virus@Flock_house_virus_TNCL_RNA2=1383	1383		0.574463	0.574463		172.057	43.0495	215.106		0	0	0		0.978856	0.4924	0.809801
virus@Flock_house_virus=1400	1400		0.236127	-0.236127		30.6015	7.87434	38.4758		0	0	0		0.58643	0.777909	0.985338
virus@myonecrosis_virus=7560	7560		-1.17922	-1.17922		0	0	0		0	0	0		0	0	0
virus@Nora_virus=11908	11908		0.584746	0.584746		4080.56	2998.05	7078.61		1.95576	1.1883	1		2.11505	1.85631	0.855274
virus@tetravirus=3005	3005		1.17028	1.17028		819.167	530.033	1349.2		0.873357	0.656283	1		0.888505	0.57002	1.42847
virus@totivirus=6780	6780		0	0		0.047152	0	0.047152		0	0	0		0	0	0
virus@x_virus_a=3360	3360		0.584229	-0.584229		1689.78	1210.53	2900.3		0.863982	0.925799	0		0.41003	0.269887	0.655647
virus@x_virus_b=3243	3243		1.76557	-1.76557		1397.11	1090.81	2487.91		0.642134	0.337297	1		0.582179	0.161689	0.48877
XDMR=361	361		0	0		0.707276	1.83892	2.54619		0	0	0		0	0	0
ZAM=472-7962	7962		7.2183	7.2183		10.7977	2060.39	2071.19		1.12746	0.958918	0		1.53109	0.418713	0.957543

## Sheet: Genes_PiwiCLIP_andExpression
Table S2. PIWI CLIP and Expression analysis of TEs and Genes in OSS_C cells. Tab: Genes
Gene	Length	Strand	Corrected PIWI CLIP Score Avg/Block)		OSS piRNAs RPM(+)	OSS piRNAs RPM(-)	Total piRNAS		4 Lib siPiwi KD ratio	StDev	Cutoff expression		Cyto siPiwi KD ratio	Nucplsm siPiwi KD ratio	NUN siPiwi KD ratio		Computed EdgeR Ratio	EdgeR log2_Fold Change	EdgeR logCPM	EdgeR Pvalue_exact
TRAM	2591	+	1		7.13563	0	7.13563		0.903157	0.264406	1		0.955481	0.799967	1.04664		0.917283	-0.12456	7.35985	0.879274
Sp1	26148	+	1		4.76756	6.84255	11.6101		-	-	-		-	-	-		0.801624	-0.319002	0.0925563	0.908261
Ser7	1853	+	1		0	0.0235759	0.0235759		-	-	-		1.28653	0.481268	-		1.01223	0.0175443	0.982568	1
mus81	2173	+	1		3.67784	0.707276	4.38511		0.895438	0.438127	1		1.50095	0.962535	0.872364		0.902395	-0.148168	2.68724	0.864208
MED22	723	+	1		0.471517	0	0.471517		0.834291	0.165257	1		1.3108	0.749714	1.53928		0.991333	-0.0125586	7.21788	0.988043
Idgf4	2714	-	1		0.188607	0	0.188607		0.554294	0.359901	1		1.60816	0.787529	0.656452		0.611351	-0.709928	2.85635	0.511432
CR43498	567	-	1		0	0	0		-	-	-		-	-	-		1	5.13e-15	-1.36554	1
CG9691	605	+	1		0.188607	0.0471517	0.235759		0.900114	0.375387	1		1.575	1.17714	1.36452		1.0919	0.126843	9.76686	0.908735
CG9689	977	+	1		0.0943035	0	0.0943035		0.594504	0.29717	1		1.6439	0.989088	0.816206		0.707682	-0.498826	4.68076	0.480378
CG9686	667	+	1		0	0.00943035	0.00943035		-	-	-		1.4818	1.12598	0.696416		0.900649	-0.150963	3.28982	0.890989
CG43386	10705	-	1		0.0750141	0.0574428	0.132457		0.872028	0.890957	0		-	0	-		0.759783	-0.396341	0.161695	0.819851
CG42657	1107	+	1		0.00673596	0.0471517	0.0538877		-	-	-		-	-	-		0.140859	-2.82767	-0.620503	0.29702
CG42262	3379	-	1		0.0574428	0.0596541	0.117097		-	-	-		1.12571	1.10004	-		1.12831	0.174165	0.165847	0.941772
CG3711	4428	-	1		12.6131	0	12.6131		0.741365	0.202275	1		1.74232	0.695165	1.06651		0.78852	-0.34278	5.136	0.644011
CG3708	1301	-	1		0.0471517	0.895883	0.943035		-	-	-		-	-	-		1	5.13e-15	-1.36554	1
CG3706	1741	-	1		0	1.55601	1.55601		-	-	-		0	0.320845	-		0.301787	-1.7284	-0.615931	0.350785
CG3704	1632	-	1		1.48528	0.848731	2.33401		0.843047	0.149026	1		0.909313	0.776718	1.00182		0.971092	-0.0423203	5.87476	0.957326
CG3703	3306	-	1		1.32025	8.15725	9.4775		0.842385	0.689454	0		0.97974	0.947011	0.783352		0.794556	-0.331778	1.64562	0.725477
CG3699	831	-	1		0	0.0471517	0.0471517		-	-	-		-	-	-		0.209765	-2.25315	-0.625518	0.198711
CG3690	2593	-	1		0	0.0471517	0.0471517		-	-	-		-	-	-		1	5.13e-15	-1.36554	1
CG32815	6299	+	1		10.2005	1.43813	11.6386		1.0257	0.502283	1		1.86087	0.728405	1.16116		0.941091	-0.0875933	3.91458	0.935115
CG32698	60864	+	1		31.4266	0.303601	31.7302		-	-	-		0.964895	0.661743	0.87217		1.00831	0.0119434	0.421932	1
CG32695	451	-	1		0	0	0		0.591333	0.250467	1		2.25142	1.40005	-		0.564135	-0.825888	2.62697	0.440135
CG32694	17188	+	1		0.0235759	0.157172	0.180748		0.530231	0.206712	1		1.61401	0.307944	0.592863		0.559146	-0.838704	6.81016	0.368229
CG1986	1735	-	1		0	0	0		-	-	-		-	-	-		0.160566	-2.63876	-1.18584	0.583952
CG1889	1721	+	1		0	0	0		-	-	-		0	0.962535	-		4.87352	2.28497	-1.26404	1
CG18823	321	+	1		0	0	0		-	-	-		-	-	-		0.451702	-1.14656	-0.676372	0.779832
CG1791	1426	-	1		0	0	0		-	-	-		-	-	-		0.370805	-1.43127	-1.28275	1
CG15252	2356	-	1		0	0	0		-	-	-		-	-	-		0.386683	-1.37078	-0.414531	0.361015
CG15249	871	-	1		0	0	0		-	-	-		-	-	-		0.115084	-3.11924	-1.04354	0.567324
CG15247	2181	-	1		0	0	0		-	-	-		4.82447	3.85014	-		0.400556	-1.31992	-0.859251	0.341915
CG1468	858	+	1		0	0.0471517	0.0471517		-	-	-		0.482447	1.15504	-		1.03137	0.0445659	2.13207	0.9903
CG1354	3173	+	1		2.55733	0.0235759	2.5809		0.879379	0.40801	1		1.28771	0.769899	1.19985		0.812969	-0.298728	6.86657	0.700533
btd	3376	+	1		0.0476353	0.141455	0.189091		-	-	-		-	-	-		1.12465	0.169474	-0.460494	1
nej	17849	-	7.16393		11.1907	0.433796	11.6245		0.93513	0.602669	1		0.997202	0.667474	0.803761		0.894157	-0.1614	6.83699	0.829451
CG3106	3661	-	1		0.332544	0	0.332544		0.991259	0.474325	1		0	4.81268	-		1.28646	0.363404	0.945631	0.796274
l(1)G0232	30193	-	1		18.0616	1.99291	20.0545		1.65769	0.565574	1		2.33606	0.987892	1.55894		1.90637	0.930828	5.13953	0.210677
CG42797	14138	+	1		23.2707	0.828782	24.0995		0.694734	0.29032	1		2.24515	0.758329	0.951839		0.780766	-0.357039	5.58764	0.60976
Aats-lys	2522	-	1		0	0	0		-	-	-		-	-	-		1	5.13e-15	-1.36554	1
CG3004	1813	-	1		7.82719	5.96469	13.7919		0.779363	0.182569	1		1.11173	0.679538	0.830483		0.879545	-0.185171	6.6982	0.81085
Gga	3247	+	1		7.02561	4.1022	11.1278		1.66081	1.63987	0		2.36629	0.947208	1.03259		1.21611	0.282269	3.2304	0.723089
Hex-A	2517	+	1		2.31044	0.0471517	2.35759		0.885112	0.708289	0		1.31577	0.700923	0.9539		1.09199	0.126966	4.04415	0.899172
CG42395	1078	-	1		0.17027	0.0235759	0.193846		0.546504	0.194963	1		0.289468	0.855587	1.08051		0.732984	-0.448146	0.99223	0.691799
CG32699	8439	-	1		18.253	0.0235759	18.2765		0.765791	0.144698	1		1.91684	0.745818	1.10218		0.805478	-0.312083	7.37287	0.705269
CG32702	12644	-	1		17.8705	0.235759	18.1063		1.03655	0.559995	1		1.19368	0.472038	1.18397		1.09954	0.136903	5.25067	0.83992
CR42767	764	-	1		0	0	0		-	-	-		-	-	-		1	5.13e-15	-1.36554	1
CG15317	938	-	1		0.707276	1.22595	1.93322		1.12203	0.537158	1		1.52352	0.98346	1.09328		1.3924	0.477579	4.13718	0.540038
RpS28b	588	+	1		6.837	0.0471517	6.88415		1.12141	0.343366	1		1.03896	0.879799	1.29816		1.23072	0.299503	12.9614	0.760385
l(1)G0320	2066	-	1		5.65821	0.0943035	5.75251		0.842486	0.0998356	1		1.90347	0.908483	0.943001		0.978636	-0.031155	7.22131	0.965473
CG34026	488	+	1		0	0.0471517	0.0471517		-	-	-		-	-	-		0.97558	-0.0356682	-0.987806	1
CG34028	639	+	1		0	0	0		-	-	-		-	-	-		1	5.13e-15	-1.36554	1
CG32700	44513	-	1		8.7134	0.963804	9.67721		0.844095	0.881555	0		0.964895	0.802113	0		0.787926	-0.343869	3.45254	0.808374
CR43497	3675	-	1		0	0	0		-	-	-		-	-	-		1	5.13e-15	-1.36554	1
Megalin	140286	-	0.667147		100.949	4.12227	105.071		0.92969	0.614402	1		1.47273	1.01022	1.61834		1.04431	0.0625497	3.6126	0.959507
BCL7-like	1949	+	1		32.1811	7.35567	39.5367		0.541626	0.144797	1		0.966694	0.682939	0.744481		0.578558	-0.789467	7.73238	0.296493
CG34450	1306	-	1		1.69746	0	1.69746		-	-	-		-	0.962535	1.96135		0.947261	-0.0781662	0.47121	1
CG34449	28211	-	0.979824		35.2137	0.0857684	35.2995		0.657433	0.120465	1		2.05321	0.787926	1.23048		0.716062	-0.481844	6.46492	0.508625
c12.2	4868	+	1		1.65031	0.28291	1.93322		1.16875	0.589022	1		0.81413	0.780434	0.930237		1.31556	0.395682	3.01522	0.635864
c12.1	1331	-	1		1.69746	0	1.69746		0.925732	0.135036	1		1.21471	0.944084	1.09389		1.09347	0.128913	8.32661	0.88389
lz	18989	+	1		0.455089	0.40656	0.861649		1.88218	0.965499	1		2.09061	1.05004	1.99936		1.90718	0.931439	2.87747	0.210774
c11.1	7450	-	1		6.22403	2.59335	8.81737		1.17521	0.719278	1		1.47032	0.85288	1.04725		1.39291	0.478098	4.62254	0.513841
CG16892	1938	+	1		1.50886	0.754428	2.26328		0.656417	0.131004	1		1.11247	0.909713	1.27173		0.766249	-0.384115	6.66954	0.648086
CG17446	2289	-	1		0.259335	0	0.259335		1.81456	1.59937	0		1.12811	0.818302	0.921963		1.733	0.793273	2.62949	0.390496
CG17440	1488	-	1		0.212183	0	0.212183		-	-	-		1.15787	1.76465	1.9207		4.26022	2.09093	-0.577794	0.315018
CG32703	6323	-	1		0.188607	0.424366	0.612973		1.37783	0.42777	1		3.99805	0.887327	1.31774		1.51405	0.598408	4.78512	0.406684
ric8a	2494	+	1		2.87626	0	2.87626		0.944411	0.582272	1		1.40134	0.909821	1.05907		0.981562	-0.0268485	3.90392	0.982533
CG17754	5378	+	1.35844		23.8635	0.0471517	23.9106		0.866404	0.393894	1		1.84841	0.941456	1.3969		0.862832	-0.212848	5.52957	0.756274
Dsor1	2696	+	1		6.97846	0.0943035	7.07276		0.725938	0.126604	1		0.967988	0.859814	0.805656		0.844798	-0.243322	6.69956	0.737061
amx	1422	-	1		0.707276	0.330062	1.03734		0.602092	0.286379	1		1.44734	0.700026	0.592671		0.58751	-0.767314	4.13515	0.296417
CG42569	2148	+	1		0.895883	0	0.895883		1.73586	1.12022	1		2.01095	0.789845	0.872719		1.70894	0.773098	3.61711	0.388017
mxc	6404	-	1		3.81929	0.0565821	3.87587		1.7196	1.49023	0		2.0445	0.787663	0.807373		1.46856	0.554402	4.40474	0.441318
Ir8a	3860	-	1		0.0550104	0.0943035	0.149314		-	-	-		-	0.962535	-		0.352657	-1.50366	-0.279588	0.457168
CG12121	3587	-	1		2.35759	0.0943035	2.45189		0.799724	0.418243	1		2.12538	0.777253	1.3715		0.947379	-0.077986	5.2094	0.919072
Gr8a	1693	+	1		0.0471517	0.0943035	0.141455		-	-	-		-	-	-		3.67762	1.87877	-0.922982	0.339426
CG15370	1113	+	1		0	0	0		-	-	-		-	-	-		1	5.13e-15	-1.36554	1
t	5603	-	1		0.0956507	0.28291	0.378561		-	-	-		-	-	-		0.0958423	-3.38319	-0.917547	0.343091
CG15369	476	+	1		0	0	0		-	-	-		-	-	-		1	5.13e-15	-1.36554	1
CG15368	489	+	1		0	0	0		-	-	-		-	-	-		1	5.13e-15	-1.36554	1
Obp8a	806	+	1		0	0	0		-	-	-		-	-	-		1	5.13e-15	-1.36554	1
CG12119	4428	-	1		0	0.0471517	0.0471517		-	-	-		-	-	-		2.52059	1.33376	-0.945171	1
su(r)	5932	-	1		0	0.0471517	0.0471517		-	-	-		5.30692	0.481268	-		1	5.13e-15	-1.36554	1
CG12118	1720	-	1		0.895883	1.3674	2.26328		0.723133	0.234441	1		1.50874	1.17178	1.28797		1.01061	0.0152328	3.46638	0.99036
CG12106	1408	+	1		1.4617	0.612973	2.07468		0.866771	0.101254	1		0.841478	1.12637	0.67543		1.02301	0.032822	4.2851	0.965762
CG12056	959	+	1		0.377214	0.0943035	0.471517		0.8034	0.220725	1		0.913204	0.858381	1.1703		1.01754	0.0250881	7.22845	0.975597
CG12057	877	+	1		0	0.141455	0.141455		-	-	-		-	-	-		1	5.13e-15	-1.36554	1
CG12115	1258	-	1		0	0	0		-	-	-		0	-	-		0.663676	-0.59145	-1.19042	1
mei-P26	8411	+	1		6.33503	0.235759	6.57079		1.25433	0.548334	1		0.723671	0.84627	1.08707		1.15899	0.212864	4.13369	0.802197
Zpr1	1925	-	1		0.80158	0	0.80158		0.701804	0.360506	1		1.21599	0.937072	0.967211		0.876109	-0.190818	3.72168	0.82578
CG9034	476	-	1		0.471517	0.0471517	0.518669		1.82998	2.02163	0		0.643263	1.56756	2.38871		1.26101	0.334584	8.4969	0.801086
Dip1	722	+	1		0.141455	0	0.141455		0.836944	0.206921	1		1.07623	1.24563	0.664946		0.960096	-0.0587493	4.75803	0.956996
Ost48	1590	-	1		3.15917	0.0471517	3.20632		0.84979	0.118426	1		1.08831	0.90699	0.915611		1.10427	0.143099	8.52137	0.87461
His3.3B	3451	-	3.72943		11.9818	0.707276	12.6891		0.865972	0.270376	1		1.03635	0.790816	1.4624		0.91101	-0.134461	12.7907	0.874975
dalao	2654	+	1		1.69746	0.0943035	1.79177		1.02508	0.260495	1		1.12809	0.866955	1.01092		1.34509	0.427703	6.61074	0.591085
fh	966	-	1		1.79177	0.754428	2.54619		0.870231	0.279846	1		1.24058	1.1306	2.15663		0.922642	-0.116157	5.12599	0.886289
CG7065	5179	+	1		1.89332	0	1.89332		1.02131	0.939389	0		1.05114	0.678736	0.967569		1.15436	0.207091	3.69133	0.812786
fend	9887	-	1.23434		5.08734	3.25347	8.34081		0.520933	0.148239	1		1.4995	0.651323	1.06462		0.617747	-0.694913	6.6462	0.473649
AP-1gamma	9052	+	1		14.8567	0.412578	15.2693		0.875564	0.459089	1		1.89801	0.838888	1.06297		0.992093	-0.0114532	6.27403	0.988916
CG7039	1318	+	1		1.2731	0.0471517	1.32025		0.846041	0.273895	1		1.25637	0.7661	0.961543		0.853433	-0.22865	4.40896	0.740299
Bx42	2285	-	1		0.895883	0	0.895883		1.05964	0.462293	1		1.03445	0.780628	0.99198		1.19196	0.253342	4.97096	0.720009
CG7766	10112	-	1		10.4323	0.0471517	10.4795		0.898359	0.5987	1		1.52234	0.665076	1.05458		0.79002	-0.340039	5.71563	0.635061
CG7033	3314	+	1.80502		10.9392	0.141455	11.0807		0.823301	0.149145	1		1.17398	0.961522	1.20958		0.946711	-0.0790036	9.41287	0.916927
CG6999	948	+	1		0.0235759	0.0235759	0.0471517		0.875098	0.312815	1		1.288	1.14509	0.104839		0.897358	-0.156244	5.29917	0.821314
CG32706	947	+	1		0.0235759	0.0235759	0.0471517		0.918601	0.510022	1		1.41423	1.20979	0.468011		0.881983	-0.181177	5.2023	0.794035
CG32708	930	+	1		1.03734	0	1.03734		1.01628	0.515857	1		1.71537	1.03437	1.25215		0.974833	-0.0367733	4.42632	0.971405
APC4	2937	+	1		1.60316	0	1.60316		1.1394	0.669352	1		1.42054	0.882324	0.817742		1.28165	0.358002	3.53031	0.644447
HP1b	1684	+	1		0.754428	0.00589397	0.760322		0.789264	0.170562	1		1.05049	0.906621	1.00317		0.946527	-0.0792841	6.42447	0.916862
CG7246	2236	-	1		0.707276	0.0471517	0.754428		0.990663	0.500534	1		1.02765	0.690208	0.907799		0.931539	-0.102312	4.28469	0.915937
CG15366	354	-	1		0.141455	0	0.141455		-	-	-		-	0	2.09677		0.679364	-0.557743	-0.898807	1
CG7267	7048	-	1		4.55702	0.188607	4.74563		0.564339	0.308209	1		1.55002	1.01213	1.4222		0.679651	-0.557135	9.34792	0.515102
CG10970	1809	-	1		2.0511	0.0707276	2.12183		0.844916	0.674303	1		1.15787	1.03383	1.3288		0.639237	-0.645577	4.63739	0.494126
CG15365	13286	-	1		15.4222	0.829442	16.2517		0.882097	0.205814	1		1.36728	0.692793	1.1658		0.974556	-0.0371837	4.91538	0.964161
CG42388	23115	+	1		4.66353	1.46956	6.13309		1.35859	0.906085	1		1.87901	0.966546	0.975479		1.34597	0.428644	2.01993	0.651561
CG32709	1402	+	1		4.39084	0.0471517	4.43799		1.10744	0.740117	1		1.60816	0.759896	1.45269		0.818762	-0.288484	2.16509	0.817648
CG11663	726	+	1		0.565821	0.471517	1.03734		-	-	-		-	-	-		1	5.13e-15	-1.36554	1
CG14632	17475	-	1		18.955	17.4461	36.4011		0.681991	0.369465	1		0.663365	0.716305	1.16864		0.689814	-0.535721	1.66771	0.628372
CG11664	765	+	1		0	0.235759	0.235759		-	-	-		-	-	-		1	5.13e-15	-1.36554	1
CG14634	594	+	1		0	0.141455	0.141455		-	-	-		-	-	-		1	5.13e-15	-1.36554	1
CG3713	960	-	1		0	0	0		0.728228	0.504191	1		-	-	0.788338		0.880942	-0.182881	0.516868	0.934669
CG14635	475	+	1		0	0	0		-	-	-		-	-	-		1	5.13e-15	-1.36554	1
CG42248	76248	-	1.23434		101.657	65.909	167.566		0.735706	0.535593	1		2.72943	0.819793	1.10366		0.819987	-0.286326	4.98933	0.690435
Sec22	2131	+	1		19.7094	0.141455	19.8509		1.76755	1.05617	1		2.19034	1.11464	1.57017		2.20205	1.13885	5.96689	0.232522
CG13358	3881	-	1		0.471517	0.80158	1.2731		0.538558	0.191964	1		1.15964	0.543833	0.798568		0.640731	-0.64221	5.80087	0.346587
CG13359	1803	-	1		0.495093	1.29667	1.79177		0.623179	0.280774	1		0.562855	0.385014	0.743112		0.655576	-0.609165	2.04744	0.456594
CG12662	516	-	1		0	0.377214	0.377214		-	-	-		-	1.92507	-		0.447907	-1.15873	-0.696259	0.599806
CG10962	76081	-	1		3.17926	34.6956	37.8749		0.444823	0.115264	1		0.52454	0.511347	0.537106		0.613396	-0.70511	7.1224	0.466291
CG43255	408	+	1		2.7348	0	2.7348		-	-	-		-	-	1.03898		0.159944	-2.64436	-1.06202	1
CG12661	396	-	1		0	1.50886	1.50886		-	-	-		-	-	-		4.79092	2.2603	-1.26422	1
rdgA	118741	+	1.23615		74.6576	4.48147	79.1391		1.10513	0.992701	0		2.15246	0.80853	1.0407		0.884934	-0.176359	3.54174	0.842476
e(r)	1517	-	1		6.93131	0.188607	7.11991		0.798123	0.228888	1		2.41224	0.786177	1.0287		0.853849	-0.227947	7.71049	0.817347
Rbm13	1788	+	1		0.565821	0.0943035	0.660124		0.904706	0.395987	1		1.24386	0.736317	0.691414		0.773896	-0.369789	5.48864	0.71771
CG1885	1143	-	1		0.235759	0.0943035	0.330062		0.829377	0.469157	1		1.72784	0.855587	1.4557		0.860448	-0.216841	3.8514	0.784007
Moe	25299	-	0.667147		67.3577	1.15522	68.5129		1.74773	1.99699	0		2.65824	0.843437	1.10813		1.52591	0.609672	7.36564	0.429572
CG12075	34452	+	1		0.769798	2.72105	3.49085		0.725573	0.39341	1		1.14581	0.908052	0.851404		0.841283	-0.249337	3.90325	0.775003
Lim1	48540	-	1		8.77003	1.93279	10.7028		-	-	-		-	-	-		0.44365	-1.17251	0.715963	0.496269
CR43297	1228	+	1		0	0	0		-	-	-		-	-	-		1	5.13e-15	-1.36554	1
CG1789	982	+	1		0.471517	0	0.471517		-	-	-		1.94185	0.818367	0.61778		0.952596	-0.0700634	3.82513	0.958952
l(1)G0020	3530	-	1		4.05505	4.0079	8.06295		0.538461	0.0645371	1		0.916163	0.706672	0.892335		0.601703	-0.732877	6.13945	0.3037
CG1785	2115	+	1		4.47941	2.78195	7.26137		1.5418	1.18251	1		1.58587	0.872238	0.81787		1.73035	0.791061	3.89217	0.333453
CG2004	2166	-	1		1.3674	0.28291	1.65031		0.846991	0.367839	1		0.795615	1.02922	1.29731		0.890672	-0.167033	4.99121	0.804636
Hexo2	2827	+	1		2.45189	0.330062	2.78195		0.538786	0.300322	1		1.1978	0.717957	0.821652		0.428673	-1.22205	6.14459	0.154501
CG11294	1512	-	1		0.00224532	0.165031	0.167276		-	-	-		-	-	-		1.26855	0.343176	-0.941378	1
Ogg1	1482	+	1		0.754428	0	0.754428		1.05478	0.37083	1		0.735158	0.709666	0.769941		0.911983	-0.132922	4.15991	0.878842
Ppt1	1418	-	1		4.1965	5.65821	9.85471		0.747526	0.141923	1		0.827053	1.067	1.29816		0.876016	-0.190971	7.51315	0.817586
CG11284	7179	+	1		16.1788	3.88216	20.061		0.688099	0.223007	1		2.57171	0.717689	1.0272		0.654723	-0.611043	6.77406	0.485389
CG12772	3642	+	1		0.943035	0.0707276	1.01376		1.60947	1.10929	1		1.29658	0.763091	1.09055		1.32563	0.406677	2.83302	0.617176
oc	20519	-	1		0.223971	0.133597	0.357567		-	-	-		0.482447	-	-		0.87794	-0.187806	1.22874	0.920605
Caf1-180	3942	-	1		2.12183	0.188607	2.31044		1.18787	1.10475	0		2.0125	0.648269	0.759005		1.32964	0.411038	3.37259	0.652445
Crag	9179	+	1		6.08257	0.188607	6.27118		0.966889	0.500844	1		1.47348	0.622569	1.04279		1.08175	0.113363	5.2867	0.866954
CG12659	1775	-	1		5.75251	2.0511	7.80361		1.501	0.698441	1		1.49506	0.877606	0.961738		1.65444	0.726339	4.42267	0.290269
CG12081	1887	+	1		1.90965	2.26328	4.17293		0.892462	0.164396	1		1.05576	0.979422	1.28526		1.12581	0.170957	6.20501	0.839048
CG12065	14225	+	3.60611		17.6426	0.551675	18.1943		0.741367	0.47976	1		1.70021	0.858716	1.23129		0.716868	-0.48022	6.57894	0.500507
spirit	2483	-	1		0	0.377214	0.377214		0.561579	0.163077	1		0.536053	0.532133	0.682351		0.692149	-0.530846	6.91392	0.524956
CG12111	684	-	1		0	0	0		0.905343	0.754893	0		1.68857	0.320845	0.677688		1.04226	0.0597154	2.93072	0.954068
Trf4-1	6986	+	1		7.26414	0.141455	7.4056		0.994815	0.260165	1		2.04027	0.835057	1.20975		0.993724	-0.00908276	5.39074	0.992626
CG12112	1316	-	1		3.15917	0	3.15917		0.7078	0.156863	1		1.67499	0.949222	0.774935		0.779481	-0.359415	5.63671	0.665202
IntS4	3519	-	1		1.32025	0.28291	1.60316		0.930524	0.563151	1		0.647669	0.83194	0.741064		1.39136	0.476495	3.60903	0.609656
PIP82	4312	-	1		0.0471517	2.59335	2.6405		0.584616	0.3568	1		-	-	-		0.614941	-0.70148	-0.328785	0.704661
Nrg	34745	+	1		79.9742	0.247904	80.2222		0.997591	1.05385	0		1.91225	0.696588	1.02453		0.692269	-0.530596	7.29328	0.509255
CG33181	26634	+	1		4.77726	0.922406	5.69966		0.544073	0.425154	1		0	0.721902	-		1.15811	0.211768	2.2601	0.874132
otu	4528	-	1		0.00471517	0	0.00471517		-	-	-		-	-	-		0.926877	-0.109551	-0.453049	1
Cp38	1475	+	1		0	0.00235759	0.00235759		-	-	-		-	-	-		0.701414	-0.511661	-0.392927	0.860285
Cp36	944	+	1		0	0	0		-	-	-		-	-	-		0.091761	-3.44598	-1.16655	0.448746
Cp7Fc	1204	+	1		0	0	0		-	-	-		-	-	-		1.23692	0.306758	1.88893	0.874695
Cp7Fb	2867	+	1		0.0471517	0.0471517	0.0943035		-	-	-		1.92979	0	-		0.953649	-0.0684693	-0.615184	1
Cp7Fa	2200	+	1		0.0943035	0.0471517	0.141455		-	-	-		-	-	-		9.3849	3.23034	-1.16701	0.352009
CG12116	1565	-	1		0	0.0499254	0.0499254		-	-	-		2.89468	0	-		1	5.13e-15	-1.36554	1
CG33223	18196	-	1		0.168663	0.245268	0.413931		-	-	-		-	-	-		1	5.13e-15	-1.36554	1
Sptr	1693	-	1		0.377214	0.235759	0.612973		0.798782	0.302158	1		1.6975	1.07992	0.652535		0.802817	-0.316857	2.86167	0.705038
Es2	1874	+	1		0.471517	0.188607	0.660124		1.04265	0.527488	1		1.45282	0.831875	0.820638		1.13512	0.182851	3.56383	0.806502
CG15347	2401	-	1		0.0759264	0.00428652	0.0802129		0.727463	0.676509	0		1.3622	0.809752	0.548521		1.12729	0.172859	2.42976	0.906032
CG32713	704	-	1		0.0248502	0.0471517	0.072002		-	-	-		-	-	-		0.371063	-1.43026	-1.28275	1
org-1	6062	-	1		0.0422703	0.0943035	0.136574		-	-	-		-	-	-		0.945122	-0.0814268	-0.670188	1
CG12123	1095	-	1		1.22595	0.530457	1.7564		1.17394	0.165963	1		0.919806	0.962535	2.152		1.38585	0.470773	4.74459	0.505631
CG1440	3857	+	1		1.3674	0.0707276	1.43813		0.593755	0.199689	1		1.27615	0.771724	0.940123		0.711804	-0.490448	5.36545	0.554469
CG12125	2880	-	1		9.76041	0	9.76041		0.802246	0.351007	1		1.03448	0.796215	1.10608		0.823263	-0.280574	4.41733	0.676767
CG32712	725	-	1		0	0	0		0.487039	0.834205	0		0	2.24592	-		0.500564	-0.998374	0.0616696	0.412169
Trf2	20924	+	1		28.5601	3.78393	32.344		0.901392	0.795644	0		1.16752	0.734487	0.966153		0.771711	-0.373868	6.04361	0.668537
lawc	3717	-	1		4.7859	2.09039	6.87629		0.938938	0.28407	1		1.06847	0.796053	1.06237		1.01899	0.0271348	8.01851	0.976232
CG11190	2752	-	1		2.12969	0.0707276	2.20041		0.759198	0.333874	1		1.66595	0.857134	1.2528		0.860937	-0.21602	5.01805	0.745766
CG10555	5003	+	1.9685		5.78028	0.28291	6.06319		0.922007	0.393636	1		1.83127	0.77442	0.945331		0.9692	-0.0451337	6.40459	0.957463
CG15345	1106	-	1		3.06486	0	3.06486		1.27225	0.366897	1		1.44734	0.779195	0.473041		1.48145	0.567011	3.42037	0.439604
CG1387	3724	+	1		0	0	0		-	-	-		-	-	-		5.35421	2.42067	-1.26327	0.606021
CG15344	408	+	1		0	0.188607	0.188607		-	-	-		-	-	-		1	5.13e-15	-1.36554	1
nAcRalpha-7E	46872	-	1		13.1185	1.84414	14.9626		0.722379	0.196635	1		0.640966	0.574458	0.882423		0.876674	-0.189888	5.63845	0.786036
CG1636	2785	+	1		8.67592	4.05505	12.731		0.969051	0.557467	1		1.71961	0.711875	1.14382		0.89997	-0.152051	5.89905	0.834148
CG15343	1483	-	1		0.565821	0.895883	1.4617		0.775758	0.637975	0		1.05903	0.962535	0.677688		0.626262	-0.675162	2.65972	0.449494
Corp	1508	-	1		0.471517	0.0943035	0.565821		1.13411	0.851575	1		1.12571	1.28338	0.61328		1.00951	0.0136611	2.04111	1
CG1632	19791	+	1		6.00444	1.89786	7.90229		1.18528	0.868463	1		0	0.320845	0.597177		1.80125	0.848998	-0.225733	0.552017
ND75	3059	-	1		2.12183	0.0943035	2.21613		0.894592	0.165606	1		0.893472	0.767764	0.859274		1.09008	0.124429	8.15215	0.882159
Trxr-1	5556	+	1.47594		8.34586	0.565821	8.91168		0.893924	0.244392	1		1.05911	0.981143	1.09395		1.00822	0.0118101	8.64788	0.989282
sni	1830	-	1		1.03734	0.330062	1.3674		0.846292	0.202305	1		1.06101	1.06998	1.07683		1.03937	0.0557037	7.29598	0.955637
CG2147	800	+	1		0.754428	0	0.754428		0.862222	0.291369	1		1.05149	0.801765	1.01869		1.14433	0.194505	8.75303	0.838168
sdt	60881	+	1		105.675	0.755571	106.43		2.56509	1.67533	1		4.22557	1.90898	3.01357		2.62177	1.39054	5.31761	0.0447555
slpr	6780	-	1		12.4741	0	12.4741		0.985969	0.678384	1		1.73152	0.685584	0.98802		1.00711	0.0102168	5.86211	0.993981
CG2278	1969	-	1		2.45287	0	2.45287		-	-	-		-	0.601585	1.10424		0.547147	-0.87	-0.118487	0.621379
Or7a	1443	-	1		0	0	0		-	-	-		-	-	-		0.25139	-1.992	-1.26613	1
CG10761	1258	-	1		0	0	0		0.315605	0.270375	0		0	-	-		0.429163	-1.2204	-0.124312	0.461973
CG15337	1441	+	1		0	0	0		-	-	-		-	-	-		0.160563	-2.63879	-1.18584	0.583963
GIIIspla2	1364	+	1		0.424366	0	0.424366		0.685044	0.357939	1		1.42804	0.874364	1.16192		0.8893	-0.169259	3.54485	0.847461
Traf6	2768	-	1		3.48923	0	3.48923		1.16448	0.248498	1		1.82822	0.867285	1.08204		1.31061	0.390238	3.66791	0.632552
CG18262	1586	+	1		0.141455	0	0.141455		1.33879	1.12466	0		0.844283	0.81253	0.824893		1.28929	0.366573	2.39616	0.718345
Gbeta5	1548	-	1		0.00112266	0	0.00112266		0.664401	0.164321	1		0.679	0.666371	0.841159		0.73409	-0.445971	3.97096	0.54757
CG10959	1883	+	1		0.895883	0	0.895883		0.589707	0.150777	1		0.728594	0.845153	0.794535		0.686285	-0.54312	3.36409	0.561731
CG15336	546	+	1		0	0	0		-	-	-		0	-	-		0.251452	-1.99165	-1.26613	1
CG2129	2002	+	1		5.94112	0	5.94112		-	-	-		1.41407	0.790654	0.568065		1.17494	0.232583	2.14951	0.806205
CG2263	1698	-	1		1.3674	0.141455	1.50886		0.818664	0.256729	1		1.02284	0.944231	1.1886		0.887587	-0.17204	6.17813	0.815602
CG17982	1056	-	1		0.471517	0	0.471517		0.562504	0.246195	1		1.16604	0.848478	2.18532		0.660943	-0.597402	3.95963	0.480262
Smox	3878	-	1		6.837	0.0471517	6.88415		1.20386	0.741914	1		2.87745	0.763285	1.10931		1.04019	0.0568508	5.34235	0.953962
CG2120	1723	+	1		0.28291	1.03734	1.32025		-	-	-		1.92979	1.4438	1.25806		0.37999	-1.39597	-0.214926	0.319733
CG10958	2562	+	1		3.53638	0	3.53638		0.830868	0.55554	1		1.65048	0.788964	0.76779		0.965918	-0.0500273	2.40291	0.976101
CG2116	2044	+	1		1.08449	0	1.08449		1.61238	1.13064	1		1.22863	0.99498	0.909572		1.94713	0.961352	3.17283	0.304598
cyr	14438	-	1		0	4.90378	4.90378		-	-	-		-	1.92507	1.96935		1.92573	0.945402	-0.495186	0.55075
CG2260	2041	-	1		0.943035	0.28291	1.22595		2.34157	2.80598	0		0.982697	0.76415	0.901195		1.48438	0.569858	3.55124	0.505286
CG1575	2071	+	1		1.17879	0.612973	1.79177		1.59494	0.845422	1		1.18514	0.891819	1.12913		1.64945	0.721988	3.5032	0.345531
Gclc	13565	-	1		5.43817	0	5.43817		0.966895	0.480464	1		1.78321	0.716166	0.721422		0.933262	-0.0996453	5.32364	0.891843
CG2258	5478	-	1		0.895883	0.0943035	0.990186		1.64613	1.26472	1		0.804079	0.634715	1.08133		0.911703	-0.133365	3.30425	0.901917
Ubc-E2H	6063	-	1		9.40122	0.103526	9.50474		0.920706	0.124548	1		2.19647	0.92175	1.10431		0.987781	-0.0177367	6.57766	0.983797
CG2256	3196	-	1		0.0965488	0.0471517	0.143701		-	-	-		-	-	-		0.512357	-0.964778	-1.03105	0.338302
CG2254	3254	-	1		0.00294698	0.00342823	0.00637521		-	-	-		0	0	-		0.703554	-0.507267	-0.190203	0.817204
CG1571	2364	+	1		0	0	0		-	-	-		5.78937	0.962535	-		5.81066	2.5387	-0.656555	0.228035
Upf2	5232	-	1		4.43226	0.00785862	4.44012		1.33743	1.05839	1		2.01898	0.782534	1.18697		1.1746	0.232175	4.54824	0.754475
mys	8591	+	6.63464		37.132	1.55601	38.688		0.925073	0.748749	0		3.94016	0.782962	1.08626		0.789148	-0.341632	8.06318	0.659112
fs(1)h	21494	-	0.613817		74.2794	0.39515	74.6745		0.882212	0.49628	1		1.35701	0.697512	0.870771		0.842835	-0.246677	7.51856	0.757251
CG2233	1769	-	1		24.9433	0.0471517	24.9904		1.94091	0.17286	1		5.35587	2.43902	2.23326		1.98341	0.987981	5.51557	0.177344
CG15333	1744	-	1		0	0.141455	0.141455		-	-	-		3.85958	2.88761	6.82554		3.61202	1.85281	0.53165	0.233712
Rbf	4370	-	1		3.06486	0	3.06486		1.24421	1.02811	0		1.32629	0.785909	1.05813		1.1658	0.221324	5.19419	0.77127
CG16989	3204	+	1		1.17879	0.0943035	1.2731		1.40944	0.96718	1		0.972817	0.968115	0.86209		1.17394	0.231361	3.99096	0.754407
CG13360	2241	-	1		1.88607	0.188607	2.07468		-	-	-		-	0.481268	-		3.9894	1.99617	-0.763705	0.381658
tw	3252	+	1		0.377214	0.0943035	0.471517		1.37491	0.663337	1		2.41224	1.33274	1.18763		1.27683	0.352561	2.45721	0.702645
fz3	13284	+	1		1.2731	0.106091	1.37919		1.00224	0.64375	1		5.78937	0.861216	1.27151		0.813568	-0.297665	2.99391	0.724905
CR42491	1196	-	1		0	0	0		-	-	-		-	-	-		1	5.13e-15	-1.36554	1
RpL22	2580	-	1.80502		3.25347	0.0943035	3.34777		1.76318	1.99258	0		2.04286	0.95982	1.38777		0.622887	-0.682957	6.73496	0.56624
CG5273	2345	+	1		0.656073	0	0.656073		0.808949	0.143369	1		2.20694	1.15092	1.27193		0.908577	-0.13832	7.49503	0.885275
CG5254	2532	+	1		0.330062	0.0943035	0.424366		0.494626	0.0708816	1		0.615536	0.687525	7.03871		0.724394	-0.465153	6.81431	0.651051
CG13361	1643	-	1		0	0.377214	0.377214		-	-	-		-	0.962535	0		0.221482	-2.17474	-0.536681	0.255342
CG13362	2057	-	1		0.0943035	13.8626	13.9569		-	-	-		0.643263	0.577521	-		0.997291	-0.00391378	1.33757	1
Tbh	30838	+	1		4.3301	1.15238	5.48248		-	-	-		-	1.4438	-		1.38686	0.471822	0.644758	0.797926
sn	22062	+	1		2.1847	1.03734	3.22204		2.97953	1.24964	1		4.67212	2.24152	1.6182		3.03272	1.60061	3.72479	0.0606258
sws	11417	-	1		4.26723	0.377214	4.64445		0.825068	0.704002	0		2.9855	0.826738	1.10471		0.908928	-0.137762	5.22409	0.854389
CG15330	639	+	1		0.0943035	0	0.0943035		1.2808	0.110215	1		0.847938	0.871587	-		1.46627	0.552147	6.11337	0.566344
CG15332	2139	-	1		0.141455	0.990186	1.13164		0.826097	0.711187	0		2.52357	0.879737	1.17554		0.824516	-0.278381	2.28058	0.793553
l(1)G0193	5530	-	1		18.8135	2.12183	20.9354		0.745761	0.250865	1		1.76185	0.748378	1.04326		0.836352	-0.257817	8.51306	0.756474
CG42593	16658	+	1.11717		17.1632	27.6073	44.7706		1.17682	1.13468	0		1.87218	0.706159	1.07106		0.99742	-0.00372722	5.39653	0.994429
RpS14b	896	+	1		2.42831	0.0943035	2.52262		1.01505	0.162421	1		0.820294	0.931155	1.2025		1.50862	0.593229	12.0671	0.596751
RpS14a	934	+	1		4.64445	0.188607	4.83305		1.01678	0.165871	1		0.874167	0.894692	1.10536		1.49401	0.579191	12.9533	0.624291
CG10778	1552	-	1		3.39492	0	3.39492		0.896033	0.0716315	1		0.768645	1.18312	0.453386		1.19147	0.252738	4.75394	0.753379
CG10777	7237	-	1		62.6882	0.062869	62.7511		0.790343	0.514887	1		1.36231	0.805677	0.973741		0.587175	-0.768138	6.80157	0.381725
Ykt6	1513	+	1		2.7348	0.0943035	2.8291		1.08797	0.250575	1		1.6554	0.888121	1.36862		1.17884	0.237364	6.03492	0.766648
hdm	1615	-	1		0.0471517	0.141455	0.188607		-	-	-		1.28653	1.92507	-		0.426887	-1.22808	-0.102252	0.39217
snz	5357	+	1.35151		2.78195	0	2.78195		0.924526	0.700818	1		1.34542	0.699674	1.01544		0.73205	-0.449986	4.08643	0.528683
CG1444	3008	+	1		4.57372	0.0943035	4.66802		0.655493	0.120612	1		1.11442	0.792742	0.861205		0.7258	-0.462355	6.94492	0.510042
dpr14	4134	-	1		0.990186	0	0.990186		-	-	-		1.92979	2.64697	0.209677		0.681096	-0.554071	1.05688	0.652278
bys	1762	+	1		0.612973	0	0.612973		0.912352	0.314141	1		0.975616	0.925131	1.22246		0.758744	-0.398315	4.89256	0.630247
RpS6	1710	-	2.20753		17.6976	0.28291	17.9805		0.993841	0.426539	1		0.938142	0.822128	1.24069		0.999424	-0.000830683	11.5531	0.999445
p115	2750	+	1		0.848731	0.141455	0.990186		1.22607	0.506705	1		1.12626	0.948212	0.998815		1.33743	0.419465	4.22817	0.579129
CG18624	744	-	1		1.41455	0	1.41455		0.783742	0.248031	1		1.26164	0.883084	0.962225		1.06063	0.0849166	9.48447	0.920876
Nek2	2507	-	1		0.141455	0.0943035	0.235759		1.5674	0.516499	1		1.84938	0.849296	0.847816		1.71421	0.777547	2.08154	0.371487
CG10932	1486	-	1		0.565821	0.0471517	0.612973		1.07448	0.345954	1		1.24708	1.36861	1.23615		1.63987	0.713584	6.70299	0.427133
Ir7g	2317	+	1		0	0.424366	0.424366		-	-	-		-	0.962535	-		2.49513	1.31911	-0.694472	0.481086
Ir7f	2088	-	1		0.0943035	0	0.0943035		-	-	-		-	5.77521	4.35806		6.99484	2.80629	1.09924	0.0419027
Ir7e	1880	-	1		0	0	0		-	-	-		-	-	-		0.642169	-0.638975	-1.13342	1
Ir7d	1874	-	1		0	0	0		-	-	-		0	0	-		20.8075	4.37903	-0.987046	0.15287
Ir7c	2454	+	1		3.15917	0	3.15917		0.511573	0.183868	1		1.05261	0.687525	1.45269		0.477804	-1.06551	1.74193	0.308431
CR43615	814	+	1		0	0	0		-	-	-		-	-	-		1	5.13e-15	-1.36554	1
dec-1	6024	-	1		48.1113	0.141455	48.2527		0.708997	0.845684	0		1.35166	0.452811	0.577944		0.469623	-1.09043	7.23319	0.173877
Ir7b	2328	-	1		6.27118	0	6.27118		0.760199	0.432019	1		1.07211	0.726123	0.322742		0.481102	-1.05558	3.01482	0.260637
CG1409	622	+	1		0	0	0		-	-	-		-	-	-		1	5.13e-15	-1.36554	1
CG10920	1712	-	1		0	0	0		-	-	-		-	-	-		1	5.13e-15	-1.36554	1
CG1402	14245	+	1		0.0471517	0.521151	0.568302		-	-	-		-	-	-		0.394508	-1.34187	-0.52672	0.58433
CG32718	1167	+	1		0	0	0		-	-	-		-	-	-		0.192371	-2.37804	-1.13149	1
CG34338	333	+	1		0	0	0		0.455593	0.37758	0		0.536053	0.770028	-		0.493589	-1.01862	2.62951	0.306631
Ir7a	1845	+	1		0	0	0		-	-	-		-	-	-		0.0991823	-3.33377	-0.816634	0.586677
Tom40	2686	+	1		3.4185	0.0471517	3.46565		0.797265	0.140729	1		1.9508	0.723261	1.2327		0.891349	-0.165938	6.72392	0.812421
Rab39	1832	+	1		2.07468	0	2.07468		0.580468	0.209493	1		1.43227	0.843459	1.18848		0.635137	-0.654861	4.95595	0.327213
Pdp	2921	-	1		1.69746	0	1.69746		0.833622	0.169696	1		1.1784	0.802747	1.19091		0.9737	-0.0384507	4.74116	0.966273
CG12155	2971	+	1		2.16898	0.28291	2.45189		1.17015	0.449545	1		1.7194	0.772891	1.18597		1.33422	0.416002	3.61307	0.612327
NELF-B	2329	-	1		3.67784	0	3.67784		1.3344	1.09546	0		0.914111	0.728586	0.833138		0.9794	-0.0300296	3.82558	0.991469
Hira	3776	+	1		1.22595	0.330062	1.55601		1.15043	0.32582	1		1.49743	0.856967	1.04489		1.23356	0.302828	3.95525	0.698486
CG15478	5146	-	1		0	0.141455	0.141455		-	-	-		-	-	-		1.02588	0.0368594	-1.16739	1
CG43287	600	+	1		0	0	0		-	-	-		-	0	-		0.605117	-0.724713	0.0338456	0.70955
CHES-1-like	21361	-	1		28.0863	0.30629	28.3926		1.18671	0.566987	1		1.87839	0.695161	1.25374		1.25591	0.328731	5.72824	0.665564
ct	69112	+	1		0.73646	0.670162	1.40662		1.34181	1.56763	0		2.22218	0.875862	1.2049		1.21157	0.276879	3.68837	0.809481
CG12689	829	-	1		0	0	0		-	-	-		-	-	-		1	5.13e-15	-1.36554	1
CG11369	2478	+	1		0	0.0471517	0.0471517		-	-	-		-	-	-		9.39057	3.23121	-1.16701	0.352235
CG32720	1011	-	1		0.0943035	0	0.0943035		-	-	-		1.92979	2.31009	0.103333		0.730032	-0.453969	-0.219737	1
CG43138	392	+	1		0	0	0		-	-	-		-	-	-		1	5.13e-15	-1.36554	1
CG32719	4252	-	1		0.188607	0	0.188607		1.13668	1.04049	0		11.5787	0.329288	0.551595		0.730912	-0.452231	2.55142	0.676415
CR43279	953	+	1		0	0	0		-	-	-		-	-	-		1	5.13e-15	-1.36554	1
CG43278	3999	-	1		0.117879	0	0.117879		-	-	-		-	0.802113	-		1.97598	0.982565	-0.164419	0.716339
CG43198	643	-	1		0	0	0		-	-	-		-	0	-		1	5.13e-15	-1.36554	1
CG11368	435	+	1		0	0	0		-	-	-		-	-	-		1	5.13e-15	-1.36554	1
CG43199	964	+	1		0	0	0		-	-	-		-	-	-		1.54849	0.630862	-1.00684	1
CG32726	524	-	1		0	0	0		-	-	-		-	-	-		1	5.13e-15	-1.36554	1
CG15036	316	-	1		0	0	0		-	-	-		-	-	-		0.300326	-1.7354	0.32247	0.324079
CG9657	3045	+	1		0	0	0		-	-	-		-	-	-		0.372864	-1.42328	-1.28275	1
CG34337	441	+	1		0	0	0		-	-	-		-	-	-		1	5.13e-15	-1.36554	1
CG42705	405	+	1		0	0	0		-	-	-		-	-	-		1	5.13e-15	-1.36554	1
CG42704	629	+	1		0	0	0		-	-	-		-	-	-		0.371393	-1.42898	-1.28275	1
CG42246	640	-	1		0.0117879	0	0.0117879		-	-	-		-	-	-		1	5.13e-15	-1.36554	1
CG32727	647	+	1		0	0	0		-	-	-		-	-	-		8.07911	3.0142	-0.944374	0.577552
CG15035	1477	-	1		0	0	0		-	-	-		-	-	0.516667		0.248049	-2.0113	-1.20491	1
CG42781	120	-	1		0	0	0		-	-	-		-	-	-		0.199142	-2.32813	-1.26352	0.606929
CheA7a	814	+	1		0	0	0		-	-	-		-	-	-		0.37298	-1.42283	-1.28275	1
CG1999	1263	+	1		0.0943035	0.00785862	0.102162		-	-	-		-	-	-		1.79717	0.845726	-0.547518	0.764602
CG15034	794	-	1		0	0.0943035	0.0943035		-	-	-		-	-	-		1.11685	0.159437	-0.990195	1
CBP	5362	+	1		1.60316	0.0471517	1.65031		0.40764	0.496863	0		0.192979	0.481268	-		0.271462	-1.88118	1.27154	0.0824919
CG42780	890	-	1		0.0471517	0	0.0471517		-	-	-		1.44734	-	-		0.371444	-1.42878	-1.28275	1
CG18155	2096	+	1		0.707276	0	0.707276		1.44122	0.998657	1		1.54383	0.802113	1.06183		0.927164	-0.109104	2.33819	0.950828
Dok	4589	+	1.35151		29.7527	0.00392931	29.7567		0.843505	0.378158	1		2.35562	0.702178	1.13252		0.846555	-0.240324	5.41207	0.780993
Atg5	9144	-	1		20.9872	0.284875	21.2721		0.801631	0.368298	1		2.00856	1.04551	1.09328		0.786544	-0.3464	3.75943	0.650222
brk	3192	+	1		5.79385	0.848731	6.64259		0.892888	0.481807	1		1.18277	0.385778	0.594695		0.858786	-0.21963	4.96197	0.814892
unc-119	2625	-	1		5.4696	0.0471517	5.51675		0.80327	0.385169	1		2.26541	0.878365	1.3943		0.745255	-0.424193	6.83341	0.663134
CG2059	1760	+	1		1.50886	0.0471517	1.55601		0.917146	0.127983	1		1.02922	0.747042	0.668049		0.97657	-0.0342051	3.77899	0.980793
CG1677	124672	-	1		50.9813	49.4548	100.436		1.34445	0.965763	1		1.73319	0.755852	1.12158		1.34114	0.423462	5.38942	0.567148
CG1958	977	+	1		0	0	0		-	-	-		-	-	-		1.61413	0.690759	-0.458421	0.802874
CR32730	4267	-	1		0	0	0		-	-	-		-	-	-		1	5.13e-15	-1.36554	1
CG9650	103795	+	1		1.81746	0.404534	2.22199		0.822555	0.703563	0		1.25436	0.447251	0.397799		0.789952	-0.340163	3.07856	0.685553
fz4	4021	-	2.17169		14.2084	1.7564	15.9648		0.939075	0.474478	1		1.8379	0.689959	1.33255		0.799856	-0.322189	4.01628	0.688113
CG8300	1446	+	1		2.08646	2.01967	4.10613		0.690441	0.0630168	1		1.33186	1.01373	0.999362		0.84288	-0.246601	7.54962	0.739634
CG4617	1948	-	1		0.895883	0.0471517	0.943035		1.36928	0.737432	1		1.27581	0.6669	0.950497		1.19746	0.259972	3.08012	0.741391
CG4615	3720	-	1		4.66802	0	4.66802		0.764404	0.391861	1		1.71377	0.76339	1.31485		0.749231	-0.416518	4.45152	0.554992
CG14425	22389	-	1		76.3365	0.159584	76.496		0.844258	0.135532	1		1.60008	0.860367	1.12379		0.928774	-0.1066	7.60558	0.894048
Sxl	22389	-	1		76.3365	0.159584	76.496		0.821849	0.160128	1		1.58762	0.865481	1.10967		0.907874	-0.139436	7.89151	0.860096
CG4607	3277	+	1		0	0	0		-	-	-		-	-	-		2.2362	1.16105	2.12705	0.557339
nullo	844	+	1		0	0	0		-	-	-		-	-	-		1	5.13e-15	-1.36554	1
CG14427	1162	+	1		0	0	0		-	-	-		-	-	-		1	5.13e-15	-1.36554	1
CG12541	43668	-	1		511.19	5.28071	516.47		-	-	-		-	0.962535	0.516667		0.26545	-1.91349	-0.611223	0.270943
CG4593	1107	+	1		0.660124	0	0.660124		0.779849	0.212716	1		1.00406	0.911876	1.21784		1.14508	0.195452	7.46108	0.830021
CG3032	1424	-	1		0.612973	0	0.612973		0.95225	0.279589	1		1.39374	1.14464	0.966414		0.820121	-0.286091	1.69909	0.837093
CG42308	776	+	1		0.377214	0.895883	1.2731		0.754795	0.121249	1		1.25436	0.730814	1.40403		0.963172	-0.054135	5.17911	0.950549
CG32736	776	+	1		0.377214	0.895883	1.2731		0.754795	0.121249	1		1.25436	0.730814	1.40403		0.963172	-0.0541351	5.17911	0.950549
cm	1825	-	1		3.01771	0.0471517	3.06486		0.74058	0.165005	1		1.21661	1.20317	1.10693		0.879926	-0.184545	5.62028	0.807987
sdk	62657	+	1		96.0156	0.195343	96.2109		0.950274	0.211804	1		2.0504	1.09755	1.34336		1.09009	0.124444	5.31049	0.873926
skpA	1828	+	1		2.35759	0	2.35759		0.741154	0.189976	1		1.34051	0.771967	0.960729		0.811124	-0.302005	10.3152	0.694434
Hmt4-20	7560	-	1.58585		6.34191	0.943035	7.28494		1.25031	1.38946	0		2.52459	0.75543	0.94262		1.01319	0.0189007	5.59831	0.988236
Roc1a	1311	+	1		1.65031	0.919459	2.56977		0.800466	0.0509857	1		1.11913	0.847869	0.971595		0.950925	-0.072597	9.07515	0.922596
CG13367	1626	+	1		0.966611	0	0.966611		0.775941	0.150225	1		1.20802	0.802999	0.975266		0.897332	-0.156287	5.66991	0.831469
su(s)	7874	+	1		2.97056	0.0471517	3.01771		0.800511	0.392593	1		1.94733	0.858112	1.10333		0.99125	-0.0126798	5.27314	0.987695
Dredd	2208	-	1		0.754428	0.235759	0.990186		0.886479	0.227253	1		1.43685	0.819767	1.43244		0.81342	-0.297928	4.00369	0.750463
l(1)1Bi	3851	+	1		0.848731	0.0943035	0.943035		2.24044	2.19057	0		2.00743	0.822748	0.734519		2.24851	1.16897	3.33885	0.228108
RpL36	1146	-	1		4.57372	0.0471517	4.62087		0.813685	0.143008	1		0.876087	1.01558	1.30146		1.18703	0.247351	13.206	0.828121
CG17829	2464	+	1		1.41455	0.0943035	1.50886		0.838694	0.192676	1		1.6861	1.00685	0.9907		0.937536	-0.0930542	5.25767	0.894767
CG13364	444	-	1		0.612973	0.0471517	0.660124		0.811756	0.13853	1		1.2696	1.01278	0.703656		0.930349	-0.104156	9.11175	0.912249
CG13369	1299	+	1		0.707276	0	0.707276		0.824355	0.195488	1		0.771525	0.743938	1.30687		0.918315	-0.122938	8.54083	0.902933
mod(r)	1513	+	1		0.943035	0	0.943035		0.724111	0.12015	1		1.09965	0.837914	0.832688		0.805557	-0.311941	6.48379	0.654015
CG13365	494	-	1		0.235759	0.0235759	0.259335		0.868523	0.144859	1		0.670636	0.749403	0.972923		1.13339	0.180647	8.11991	0.857584
CG13366	9650	-	1		6.17688	0.0471517	6.22403		1.08857	1.00151	0		1.76321	0.715975	1.11647		0.958118	-0.061725	5.72439	0.932557
inx2	5487	+	1.95121		43.8788	0.330062	44.2089		0.642929	0.166296	1		1.94262	0.742675	0.981303		0.6818	-0.552579	8.30419	0.487096
inx7	18258	-	1		21.3126	45.1991	66.5117		0.57133	0.122097	1		1.44195	0.72097	1.31738		0.639386	-0.645241	6.29668	0.372846
bou	702	+	1		0.28291	0.0471517	0.330062		0.790382	0.101174	1		1.03444	0.655931	0.919803		0.881457	-0.182038	7.29759	0.806654
ogre	17392	-	1		13.0198	1.08449	14.1043		0.942568	0.454143	1		3.74606	0.855587	1.01673		0.984931	-0.0219058	5.58987	0.980337
CG3040	1087	-	1		0.565821	0.0471517	0.612973		0.803969	0.218033	1		1.01906	0.804507	1.15506		0.866683	-0.206423	4.88029	0.777006
CG4586	2329	+	1		0.235759	0.0943035	0.330062		0.930531	0.27684	1		1.24058	1.04275	1.01093		1.24856	0.320261	2.25105	0.775112
CG32732	10682	-	1		4.11006	82.0482	86.1582		1.26647	0.497787	1		1.31188	0.948915	0.955011		1.37609	0.460576	4.14092	0.495402
CG14431	48233	+	1		395.339	4.72344	400.063		-	-	-		0	0.671636	0.16891		0.815828	-0.293663	-0.105381	0.906899
CG33692	12012	+	1		29.8139	0.124615	29.9385		0.993472	0.0924098	1		1.79808	0.787089	1.01528		1.15853	0.21229	6.83282	0.803265
CG33691	12012	+	1		29.8139	0.124615	29.9385		0.930855	0.117094	1		1.72831	0.779341	1.00824		1.01567	0.0224246	7.25249	0.980944
CG14434	730	-	1		0.612973	0	0.612973		0.759356	0.0914051	1		0.84985	0.798338	0.601553		0.925175	-0.112202	7.35798	0.885172
CG4558	2112	+	1		1.93322	0.424366	2.35759		0.814326	0.189874	1		1.12026	0.720911	1.59851		0.913325	-0.130799	4.64842	0.841822
Cht11	1611	-	1		1.39098	0.990186	2.38116		0.816866	0.334033	1		1.07211	0.998185	0.471022		0.833743	-0.262325	3.01542	0.765778
CG4557	3505	+	1		0.848731	0	0.848731		1.58945	0.911655	1		1.07087	0.8713	0.86729		1.52601	0.609765	2.52054	0.452929
CG14435	4491	-	1		1.17879	1.32025	2.49904		0.849204	0.171808	1		1.21264	0.629807	1.62744		0.945683	-0.080571	4.37611	0.927074
CG12796	1288	-	1		0	0.0943035	0.0943035		-	-	-		-	-	-		2.67051	1.41712	-1.28476	1
Smg1	12903	+	1		2.59335	0	2.59335		1.4645	1.18351	0		1.64572	0.842006	1.1551		1.59303	0.671771	3.88446	0.376463
Atx-1	1000	+	1		0.377214	0	0.377214		0.596904	0.348501	1		0.241224	1.28338	-		0.795572	-0.329935	1.56959	0.782083
CG4542	1822	+	1		0.188607	0.0471517	0.235759		0.828108	0.104909	1		1.1327	0.589941	2.00681		1.10093	0.138726	4.60836	0.876032
Nf-YC	2738	-	1		1.43184	0.0471517	1.47899		1.1725	0.376057	1		1.28144	0.904068	1.07916		1.21878	0.285441	3.89393	0.726674
iav	4039	+	1		0.141455	0.141455	0.28291		1.4871	0.430084	1		2.037	0.661743	2.00681		1.71422	0.77755	0.862292	0.427367
pod1	10144	+	1.21819		23.8588	0.377214	24.236		0.969748	0.572546	1		2.28696	0.88984	1.20958		1.19003	0.250992	5.37098	0.73976
C3G	22131	-	1		9.00598	0.471517	9.4775		1.22679	0.469848	1		2.4472	0.732596	0.904956		1.22094	0.287995	4.44985	0.739028
shf	8216	-	1		0.509923	0.825155	1.33508		0.389966	0.467752	0		0.482448	0.55002	0.887366		0.434728	-1.20182	0.363642	0.322433
COQ7	1804	+	1		0.565821	0	0.565821		0.770844	0.307237	1		0.970226	0.725935	0.883761		0.645518	-0.63147	4.69908	0.471976
CR43496	882	-	1		0	0	0		-	-	-		-	-	-		1	5.13e-15	-1.36554	1
CG14438	14391	+	1.17922		14.6811	0.913684	15.5948		1.56033	1.58384	0		1.54383	0.778834	0.82879		1.26086	0.334411	4.90597	0.62199
CG14439	8204	+	1		0.0235759	0.377214	0.40079		-	-	-		-	1.92507	-		5.35174	2.42001	-1.26327	0.605865
RpL17	2721	-	1		11.1278	0.141455	11.2693		0.884873	0.0843873	1		0.952057	0.812828	1.15328		1.25218	0.324447	11.8974	0.769993
CR43461	3201	+	1		0	0	0		-	-	-		-	-	-		1	5.13e-15	-1.36554	1
CG3168	19512	-	1		35.2695	3.76911	39.0386		0.680915	0.233042	1		1.63129	0.685668	1.01355		0.777204	-0.363635	7.35475	0.623721
CG14441	17134	+	1		4.05505	0.404158	4.45921		-	-	-		8.68406	0.622817	1.05397		0.75979	-0.396327	2.12671	0.786579
CG14440	1801	-	1		0.850977	0	0.850977		0.668417	0.475012	1		4.26162	0.693592	1.11125		0.858237	-0.220552	3.81166	0.813934
CG14442	5706	-	1		5.14061	0.103734	5.24434		1.2277	1.22457	0		1.43837	0.8564	0.936745		1.11593	0.158248	4.7316	0.8382
CG3184	1175	-	1		0.518669	0.0471517	0.565821		1.01347	0.248089	1		0.771916	0.767865	1.96446		1.19388	0.255657	5.75758	0.789523
Pink1	3217	+	1		1.3674	0	1.3674		1.66489	1.30876	1		1.2336	0.892448	1.37823		3.20686	1.68116	5.42056	0.080598
CG4095	1942	+	1		1.39098	0.0471517	1.43813		0.610714	0.65846	0		1.1674	0.662295	1.06642		0.738719	-0.436903	4.22537	0.727764
l(1)G0255	3389	+	1		4.0079	0.0471517	4.05505		0.931846	0.393138	1		0.929638	0.731266	1.08777		0.893794	-0.161986	7.24733	0.845547
CG3192	1858	-	1		0.377214	0.330062	0.707276		0.802734	0.153879	1		0.837188	0.896019	0.824893		1.0317	0.0450288	8.20463	0.96276
Mcm6	2784	+	1		1.88607	0.424366	2.31044		0.969707	0.19726	1		1.3374	0.78111	1.11083		1.05365	0.0753988	5.97945	0.922236
CG3198	2773	-	1.70302		1.10021	0.212183	1.31239		1.00866	0.804268	1		1.18853	0.925841	0.922269		0.910964	-0.134535	4.2662	0.859846
Ctr1A	6612	+	1		3.63068	0.28291	3.91359		0.594291	0.270088	1		1.32038	0.684388	0.806855		0.618997	-0.691996	5.51894	0.312001
CG3224	896	-	1		0.848731	0.0471517	0.895883		0.945957	0.161463	1		1.18671	0.953368	1.42025		1.06258	0.0875679	5.09337	0.904492
l(1)G0148	5094	+	1		4.0079	0.141455	4.14935		0.996227	0.882045	0		4.39563	0.922008	1.1874		0.762125	-0.3919	4.57378	0.648479
CG3226	1134	-	1		5.42245	0.0943035	5.51675		1.1303	0.377835	1		1.89286	1.11856	1.20282		1.04462	0.0629726	6.30987	0.939393
CG14443	2211	+	1		0.141455	0.0943035	0.235759		-	-	-		-	-	0.75357		0.791817	-0.336761	-0.144172	0.828589
pigs	52034	+	1		13.8938	5.09035	18.9842		0.849126	0.898282	0		3.16396	0.487035	0.792485		0.627432	-0.672468	6.06896	0.515886
Apc7	2655	+	1		0.447941	5.61106	6.059		2.02139	1.34031	1		1.06138	0.320845	0.714593		1.74303	0.801595	0.603207	0.555368
Pat1	5855	+	1		5.28099	1.61888	6.89987		1.12229	0.605554	1		2.73617	0.903927	1.26317		1.41925	0.505132	4.96136	0.541002
CG17717	1357	+	1		0.377214	0.141455	0.518669		0.834726	0.915789	0		-	1.4438	0.172222		0.685309	-0.545173	1.30816	0.660709
CG34417	48403	+	0.602542		43.2606	3.90888	47.1695		1.14991	0.637812	1		3.2223	0.969548	1.3893		1.06566	0.0917478	6.50252	0.908195
dx	4573	+	1		23.4816	0.754428	24.236		1.14261	0.457371	1		1.95032	0.805844	1.02461		1.2755	0.351063	5.52658	0.604072
RpL7A	2270	-	1		16.6681	0.0471517	16.7153		1.06969	0.593912	1		0.903491	0.96795	1.22127		0.838334	-0.254404	10.2547	0.822561
Spat	1779	+	1		0	0	0		0.129859	0.259718	0		1.44734	0.385014	1.45269		0.17664	-2.50111	-0.384015	0.0722068
CG3342	1756	-	1		3.96075	3.77214	7.73288		1.15449	0.60345	1		1.11462	0.823989	1.06289		1.0019	0.00274369	3.26364	1
CG3918	1870	+	1		5.4696	3.58353	9.05313		1.04699	0.4276	1		1.67898	0.698755	0.947867		1.24761	0.31917	4.09861	0.682866
CG33665	682	-	1		0.00589397	0	0.00589397		-	-	-		-	-	-		0.248269	-2.01002	-1.20491	1
CG33666	618	-	1		0.0126299	0	0.0126299		-	-	-		-	-	-		0.371146	-1.42994	-1.28275	1
CG33664	618	-	1		0.0126299	0	0.0126299		-	-	-		-	-	-		0.371175	-1.42983	-1.28275	1
CG33667	682	-	1		0.0126299	0	0.0126299		-	-	-		-	-	-		0.371126	-1.43002	-1.28275	1
CG42340	59113	-	1		6.9421	0.636623	7.57872		2.07151	1.31106	1		2.12277	1.49728	1.28799		1.36755	0.451592	2.11371	0.649079
CG33668	618	-	1		0.0126299	0	0.0126299		-	-	-		-	-	-		1	5.13e-15	-1.36554	1
CG33669	646	-	1		0.0597817	0	0.0597817		-	-	-		-	-	-		0.371162	-1.42988	-1.28275	1
CG33664	618	+	1		0.0126299	0	0.0126299		-	-	-		-	-	-		0.371132	-1.42999	-1.28275	1
PpV	1783	-	1		5.84682	0.141455	5.98827		0.82128	0.147534	1		1.61509	0.84463	1.16907		0.949187	-0.0752352	5.77315	0.918416
Marf	4978	+	1		7.47355	1.24952	8.72307		0.848894	0.5188	1		1.39039	0.845844	0.999376		0.942769	-0.0850233	6.00717	0.909086
swa	2292	-	1		0	0	0		-	-	-		0.643263	2.40634	0.451792		1.38162	0.466364	-0.91931	1
kdn	10565	+	1.53766		5.94336	0.0145635	5.95793		0.79835	0.368272	1		2.79292	0.711254	1.05369		1.02631	0.0374618	5.54633	0.969139
CG3446	1077	-	1		2.8291	0.660124	3.48923		0.937244	0.186284	1		1.08109	0.787046	1.1572		1.28682	0.363809	9.54616	0.713187
CG3847	2136	+	1		5.94112	0.0471517	5.98827		0.943885	0.458502	1		1.56868	0.84594	0.743348		1.14005	0.189094	5.4563	0.813485
CG3842	4211	+	1		1.03734	1.50886	2.54619		-	-	-		2.68026	0.935798	1.40608		1.32968	0.411084	1.60804	0.774945
CG42240	1893	+	1		4.52657	0.141455	4.66802		1.44812	0.964849	1		4.09249	1.07704	0.682538		1.71302	0.776543	3.88072	0.377302
CG15894	11756	+	1		0.0471517	0.188607	0.235759		-	-	-		0	0	0.629032		0.234677	-2.09125	-0.944369	0.233462
CG3823	2756	+	1		0.117879	0.0943035	0.212183		-	-	-		-	1.92507	-		1.26681	0.341203	0.132677	0.7826
CG12219	2219	-	1		1.03734	0.0471517	1.08449		1.12734	0.848838	1		1.1265	0.668804	1.0356		0.924378	-0.113446	4.02854	0.889569
CG3815	3583	+	1		2.92341	0	2.92341		1.23022	1.03979	0		1.01327	0.858929	0.994894		1.18497	0.24485	3.99506	0.741472
CG15892	2012	-	1		0.565821	0.471517	1.03734		0.985345	0.343869	1		0.778687	1.02531	3.72641		1.191	0.252176	6.74374	0.829646
CG15891	2012	-	1		0.565821	0.471517	1.03734		0.985345	0.343869	1		0.778687	1.02531	3.72641		1.191	0.252176	6.74374	0.829642
CG15896	2129	+	1		0.235759	0.28291	0.518669		1.24521	0.325802	1		1.31577	0.715732	0.966965		1.69407	0.76049	5.31454	0.512781
Rpt4	1774	-	1		3.93717	4.33796	8.27513		3.28907	4.60329	0		1.33947	0.96631	1.28372		1.08492	0.11759	5.19738	0.897237
wuho	1440	+	1		6.78985	2.8291	9.61895		0.870752	0.0790052	1		0.922637	0.857615	1.16416		1.20446	0.268391	7.52626	0.790645
Top3beta	3524	-	4.86659		6.36548	3.01771	9.3832		0.794543	0.268065	1		0.798329	0.712616	0.814457		0.857949	-0.221036	6.99002	0.773192
Ubi-p5E	2296	-	1		12.5834	0.0518669	12.6353		1.22434	0.594663	1		1.92503	0.982562	1.27512		1.36718	0.451198	7.50077	0.566377
CG3566	1741	-	1		1.2731	0.0943035	1.3674		0.844365	0.177129	1		1.0263	0.649798	0.929234		1.0399	0.0564475	7.16056	0.945956
Spt6	7173	+	1		4.44405	0.463659	4.90771		1.53031	1.58141	0		1.11643	0.957113	1.34016		1.15668	0.209993	5.42195	0.780142
CG3781	951	+	1		0.235759	0.188607	0.424366		0.597296	0.148114	1		0.611377	0.851084	0.848872		0.77448	-0.3687	6.13401	0.649205
schlank	9560	-	1		11.3636	4.26898	15.6325		0.990545	0.197762	1		3.02212	1.14579	1.42318		1.04869	0.0685855	5.60877	0.936729
Spx	1789	+	1		3.86644	0.141455	4.0079		0.728542	0.169511	1		1.5778	0.796171	0.937838		0.92726	-0.108954	6.83969	0.898478
Rbcn-3A	14074	-	1		6.08257	0.188607	6.27118		1.54077	1.31876	0		1.11118	0.684757	0.981061		1.25442	0.327023	4.99747	0.628274
CG14445	3242	+	1		0.0943035	0.0471517	0.141455		-	-	-		0.804079	4.81268	0		1.15537	0.208353	-0.0877302	0.94397
CG14446	7520	+	0.667147		6.03542	0.0943035	6.12973		0.686307	0.371498	1		1.73681	0.6176	1.14915		0.760981	-0.394067	5.64557	0.671621
sqh	2103	-	2.20753		13.3911	0.259335	13.6504		0.818088	0.0966637	1		1.14431	0.881774	1.23805		0.983164	-0.0244962	11.5739	0.979328
Efr	2796	+	1		0.754428	0.330062	1.08449		0.467164	0.175261	1		1.77903	0.90846	1.49419		0.483633	-1.04802	4.24825	0.128459
Btd	1848	-	1		0	0	0		-	-	-		4.82447	0.192507	1.69982		2.06792	1.04818	-0.399926	0.445087
vanin-like	2372	-	1		0	0	0		-	-	-		-	-	-		1	5.13e-15	-1.36554	1
CG43090	594	-	1		0	0	0		-	-	-		-	-	-		1	5.13e-15	-1.36554	1
CG32751	1931	-	1		0	0	0		-	-	-		-	-	-		1	5.13e-15	-1.36554	1
CG32750	1630	-	1		0	0	0		-	-	-		0	-	-		0.371062	-1.43027	-1.28275	1
Ca-alpha1T	86306	-	1.2925		0.242513	1.12064	1.36315		2.31397	0.864253	1		2.48116	1.19762	2.88755		2.3305	1.22064	5.40336	0.0781315
Nep1	12204	+	1		0.660124	0.188607	0.848731		-	-	-		0.482447	0.721902	-		0.833274	-0.263138	-0.0143051	0.900385
raptor	4933	-	1		1.03734	0.0943035	1.13164		2.04852	2.65773	0		1.67743	0.718512	0.953269		1.29979	0.378284	3.34857	0.674522
Mipp2	8733	-	1		4.71517	0.0943035	4.80948		0.698565	0.268939	1		1.86631	0.744801	0.801844		0.794424	-0.332019	5.60787	0.695807
CG4660	2657	-	1		0.0471517	0	0.0471517		3.56053	2.04571	1		2.02628	1.07804	7.05394		4.72937	2.24165	7.56599	0.0524307
CG4666	1413	-	1		0	0	0		2.60088	0.629812	1		4.82447	1.81401	-		2.65225	1.40721	2.67804	0.121401
Tsp5D	5727	-	1		0.80158	0	0.80158		2.28119	1.92272	0		1.92979	1.4438	6.67957		1.69943	0.765048	3.66991	0.31968
CG5928	1305	+	1		0	0.0471517	0.0471517		-	-	-		-	-	-		1.26864	0.343284	-0.941378	1
CG43115	555	-	1		0.0943035	0	0.0943035		-	-	-		-	-	-		3.98323	1.99394	-1.20884	1
CG5921	13685	+	1		0.0471517	0.0471517	0.0943035		-	-	-		-	0	-		0.727879	-0.45823	0.311255	0.788935
CG5937	9373	+	1		0.377214	0.0471517	0.424366		-	-	-		-	1.21921	1.39448		0.792631	-0.335278	1.05108	0.839813
CG5941	1703	+	1		51.6783	0	51.6783		1.11123	0.269923	1		1.12005	0.919693	0.979871		1.46155	0.547497	7.66294	0.581159
rux	2048	-	1		0.424366	0	0.424366		0.832643	0.288317	1		1.08551	0.711439	1.11662		0.923723	-0.114468	3.64166	0.895165
mab-21	4996	-	1		0.0471517	0.0235759	0.0707276		-	-	-		3.85958	1.4438	-		0.772084	-0.373171	-0.278411	0.786141
vnd	15123	+	1		2.27019	0.424366	2.69455		-	-	-		-	1.92507	-		4.91118	2.29607	-0.841207	0.464299
Appl	48575	+	1		0.800195	715.569	716.369		2.8272	2.74733	0		4.37041	1.57149	3.40524		1.62823	0.703307	4.62932	0.423311
CG4293	2351	-	1		0.518669	0	0.518669		0.753565	0.322021	1		1.33969	0.993729	1.08279		0.854898	-0.226175	6.25117	0.756902
elav	10764	-	1		27.1594	0.471517	27.6309		0.656331	0.482218	1		1.66812	0.838528	0.901275		0.64767	-0.626668	5.17049	0.42073
arg	18611	+	1		0.848731	27.3087	28.1574		0.688274	0.350933	1		0.482448	0.481268	0.688889		0.602496	-0.730976	1.99652	0.530087
CG4766	3294	-	1		0	0	0		-	-	-		-	-	0.516667		0.979884	-0.0293169	-1.0658	1
CG5966	3833	+	1		0	0	0		-	-	-		0	0.481268	-		0.563487	-0.827546	-0.00967414	0.618115
Grip	20416	+	1		0.990186	0.0224532	1.01264		0.831494	0.263008	1		1.43178	0.936521	0.788358		0.906022	-0.142382	1.85375	0.886745
fs(1)M3	5947	-	1		0	0	0		-	-	-		-	0	0.936022		1.59725	0.675593	-0.7378	1
CG6067	2655	+	1		0.0471517	0	0.0471517		0.572916	0.447237	1		-	0.320845	-		0.389715	-1.35951	0.597092	0.276146
CG6048	1482	+	1		0.141455	0	0.141455		-	-	-		-	-	-		0.710756	-0.492574	-0.171916	0.84717
CG32755	1461	+	1		0.235759	0	0.235759		-	-	-		0	0.770028	1.96935		0.979718	-0.0295619	1.10347	1
CG6041	2019	+	1		1.03734	0	1.03734		0.963948	0.384144	1		0.964895	0.481268	0.529728		1.00664	0.00954455	3.55212	0.991949
CG32756	2170	+	1		15.8587	0.0235759	15.8823		1.02069	0.421173	1		1.75708	1.09567	1.29067		0.878058	-0.187612	5.01464	0.812186
CG12728	2015	+	1		5.24956	0.0707276	5.32029		0.658467	0.311021	1		1.72481	1.1028	1.19417		0.789721	-0.340585	4.25544	0.707091
CG3726	24494	+	1		26.5656	3.53013	30.0958		1.30762	0.33949	1		1.44522	0.781528	0.884497		1.4521	0.538139	3.93809	0.43582
CG3011	3728	-	1		0.990186	2.56977	3.55996		0.862862	0.210072	1		0.749897	0.778815	0.947085		1.23069	0.299462	10.1898	0.783481
CG12236	4955	+	1		7.98745	0.235759	8.22321		1.29105	0.666558	1		1.36119	0.591382	1.01804		1.52492	0.608733	3.52758	0.411012
CG4020	2109	+	1		0.235759	0	0.235759		0.729834	0.452428	1		0.482447	0.213897	0.555892		0.627234	-0.672925	2.15591	0.511524
Act5C	3927	+	6.03452		136.405	0.34185	136.747		0.694068	0.25154	1		1.50479	0.858408	1.18455		0.694109	-0.526766	11.9595	0.525919
CG16721	3542	+	1		1.60316	0.377214	1.98037		1.06164	0.447713	1		1.60705	1.01465	1.30832		1.156	0.20914	4.5634	0.778352
CG3016	2838	-	1		3.06486	0	3.06486		0.632888	0.146729	1		1.15335	0.725244	1.05699		0.728745	-0.456514	5.19636	0.476806
mof	3017	-	1		2.0783	0	2.0783		1.26585	0.311594	1		1.8156	0.989125	0.989435		1.55464	0.636579	4.09518	0.39171
CG3033	2524	-	1		7.11991	0	7.11991		0.64892	0.110099	1		1.17883	0.792331	1.12602		0.767495	-0.38177	5.52128	0.579867
CG15764	1014	+	1		0	0	0		-	-	-		-	-	-		1	5.13e-15	-1.36554	1
CG43137	537	-	1		0	0	0		-	-	-		-	0	-		1	5.13e-15	-1.36554	1
CG43136	627	+	1		0.0471517	0	0.0471517		-	-	-		-	-	-		0.527848	-0.921805	-0.98121	0.565076
CG12729	827	+	1		0	0.0943035	0.0943035		-	-	-		-	-	-		0.642106	-0.639117	-1.13342	1
CR43264	318	-	1		0	0	0		-	-	-		-	-	-		1	5.13e-15	-1.36554	1
CG15765	21010	+	1		0.187714	0.272432	0.460146		-	-	-		-	1.12296	-		1.29637	0.374481	2.18647	0.840798
CG15766	957	-	1		0.141455	0	0.141455		1.07627	0.409025	1		1.22467	1.11451	0.283487		1.2856	0.362437	5.22607	0.696033
Prosbeta2R1	1156	+	1		0	0	0		-	-	-		-	-	-		0.206731	-2.27417	-1.26383	1
Cpr5C	668	+	1		0	0	0		-	-	-		-	-	-		0.5465	-0.871706	-1.01096	1
CG12239	2397	+	1		0.188607	0	0.188607		-	-	-		-	-	0.763799		1.37348	0.457834	-0.506484	1
CG15767	1433	+	1		0.660124	0	0.660124		-	-	-		0.321632	0.577521	0.572849		0.405366	-1.3027	0.337759	0.376039
CG3108	4422	-	1		0	2.87626	2.87626		0.829537	0.953305	0		0.321632	0.737944	0.909558		0.691295	-0.532627	2.06656	0.626715
CG42264	3625	-	1		0	5.17176	5.17176		-	-	-		-	-	-		14.1355	3.82125	-0.963783	0.264557
CG3097	4925	-	1		0	7.73288	7.73288		0.73099	0.313035	1		1.66428	1.25075	1.7892		0.810488	-0.303137	4.6122	0.6586
CG42699	25002	+	1		25.6133	0.964253	26.5776		0.737577	0.354968	1		1.32328	0.427794	0.751823		0.841573	-0.248839	3.98676	0.723947
MAPk-Ak2	4291	-	1		13.4441	0.0471517	13.4913		0.88745	0.0793567	1		2.0664	0.902706	0.956506		0.963973	-0.0529354	7.38588	0.943323
CG15771	4114	+	1		9.10028	0.110021	9.21031		1.48182	1.08906	1		3.95891	1.01601	1.26356		1.48625	0.571678	3.22305	0.54359
lin-52	856	-	1		1.3674	0	1.3674		0.764793	0.200314	1		0.746745	0.770028	0.93646		0.859162	-0.218998	4.63061	0.738291
CG15772	1527	+	1		0.0471517	0.28291	0.330062		-	-	-		0.964895	1.4438	2.38871		2.00128	1.00092	0.700685	0.498609
CG4078	4034	+	1		2.87626	0	2.87626		0.76352	0.6308	0		1.55455	0.758704	1.31399		0.800446	-0.321125	3.41439	0.666033
IntS6	8564	-	1		5.54033	0.141455	5.68178		0.751052	0.574088	1		1.68857	0.878702	1.0664		0.95478	-0.0667593	4.67471	0.93134
CG15773	1645	+	1		0	0.0943035	0.0943035		3.80397	4.05165	0		1.70276	1.28338	-		2.36244	1.24028	2.39653	0.163767
CG32758	18305	-	1		4.57596	0.0471517	4.62312		0.701614	0.193314	1		1.84338	0.840564	1.02241		0.729433	-0.455152	5.2005	0.54209
CG33080	9218	-	1		4.80368	4.1965	9.00018		3.60188	3.08063	0		7.8946	4.81268	4.03106		3.63006	1.85999	2.89071	0.034257
CG4096	10077	+	1		0.00428652	0.0471517	0.0514383		2.10958	1.91992	0		0.385958	0.226479	2.19409		1.82689	0.869393	1.28711	0.401929
CG42794	468	+	1		0	0	0		0.48125	0.319828	1		3.85958	0.192507	-		0.536742	-0.897699	0.942188	0.451926
CG3149	2262	-	1		2.59335	0.848731	3.44208		0.717383	0.18571	1		1.10561	0.917974	1.91452		0.977915	-0.032219	6.69217	0.971389
cv	3089	+	1		2.7348	2.6677	5.4025		0.750106	0.204162	1		1.39656	0.784164	1.25251		0.812836	-0.298965	5.6289	0.661863
CG3160	4035	-	1		14.1927	0	14.1927		0.907547	0.3293	1		2.46584	0.704294	1.05296		0.938901	-0.0909551	3.73918	0.905974
CG42449	1217	+	1		0.0471517	0.0471517	0.0943035		-	-	-		-	-	-		3.17209	1.66544	-0.987825	0.641955
Gr5a	1762	+	1		0.0471517	0.165031	0.212183		-	-	-		-	-	-		1.14895	0.20031	-0.732436	1
Tre1	6146	-	1		11.6504	1.04407	12.6945		0.806872	0.17636	1		1.29134	0.879239	1.66338		0.984783	-0.0221217	6.98453	0.978315
RpL35	1102	+	1		5.79966	0.0943035	5.89397		0.940424	0.153662	1		1.52349	0.900588	1.25136		1.17058	0.227225	10.5799	0.777624
Rab-RP4	983	-	1		0.518669	0.0471517	0.565821		0.834139	0.210361	1		0.951914	0.791418	0.802304		1.088	0.121674	7.35397	0.889881
CG4119	4460	+	1		1.69746	0.141455	1.83892		1.26393	0.904985	1		1.12501	0.816454	1.04785		1.22557	0.293456	4.00969	0.702884
Sirt4	1342	-	1		0.542245	0	0.542245		0.865984	0.174081	1		0.712184	1.22505	0.992204		1.30514	0.384207	5.23066	0.692295
CG42265	8535	-	1		0	0.0964467	0.0964467		-	-	-		-	-	-		1.96174	0.97213	-0.965317	1
CG42492	20811	-	1		0.0235759	0.565821	0.589397		0.785437	0.445925	1		5.78937	1.37505	0.172222		0.9655	-0.0506523	1.67249	0.976519
l(1)G0045	2846	+	1		0.707276	0	0.707276		1.25688	0.540582	1		0.945975	0.686609	0.859073		1.39912	0.484515	2.73915	0.591588
Mlc-c	3423	-	1		22.2085	0.1019	22.3104		0.813134	0.142774	1		1.27604	0.866892	0.962915		0.975598	-0.035641	9.61135	0.962021
RhoGAP5A	2230	-	1		1.4617	0	1.4617		0.845332	0.162798	1		1.13395	0.762375	1.31962		1.12871	0.17467	7.38402	0.855197
CG34434	1817	-	1		0	0	0		-	-	-		1.92979	0.346513	0.344444		1.00969	0.013908	0.465818	1
CG34435	959	-	1		0	0	0		-	-	-		-	-	-		0.113487	-3.13939	-1.09872	0.590877
Vsx1	17945	+	1		0.0134389	0.00523908	0.018678		-	-	-		0.482447	0.481268	4.26075		0.557233	-0.843647	0.0982113	0.629797
Vsx2	31257	-	1		0.0750779	0.0624697	0.137548		-	-	-		2.89468	1.15504	-		6.08969	2.60637	0.517559	0.0604966
CG12730	1510	+	1		3.25347	1.32025	4.57372		0.838887	0.241263	1		1.21195	1.09404	0.841556		0.962223	-0.0555574	6.64263	0.939357
CG4151	744	+	1		0	1.17879	1.17879		-	-	-		-	-	-		4.87787	2.28625	-1.26404	1
CG32762	922	-	1		0.707276	0	0.707276		-	-	-		-	-	-		1.15599	0.209133	-1.1699	1
CG3239	1996	-	1		1.32025	0	1.32025		-	-	-		0	-	-		0.24823	-2.01025	-1.20491	1
SPR	46890	+	1		2.14989	7.9988	10.1487		-	-	-		0.746645	0.420015	0.471976		0.602014	-0.732131	4.54421	0.501421
CG15784	1782	+	23.0756		15.2017	0.141455	15.3432		1.05005	0.320036	1		1.33962	0.69222	0.983258		1.18405	0.24373	7.54769	0.750088
CG16756	699	+	1		0.0943035	0	0.0943035		0.630423	0.375644	1		0	0.320845	-		0.646903	-0.62838	0.53015	0.677012
CG4165	5379	+	2.99188		6.27118	0.0707276	6.34191		1.02598	0.435189	1		1.44734	0.728194	0.93027		1.18053	0.239431	4.16509	0.762326
yu	8478	-	2.20753		0	0	0		0.960285	0.672824	1		1.57782	0.775726	1.07264		0.899911	-0.152146	7.66655	0.848052
NAAT1	5614	-	1		0.0471517	0	0.0471517		-	-	-		-	0	0.258333		2.28214	1.19039	-0.370356	0.591799
SK	60886	+	1		0.508929	0.549633	1.05856		0.987495	0.0859002	1		1.73681	0.371889	1.21683		1.03628	0.0514084	3.63949	0.966781
CanB	1951	+	1		0.954823	0	0.954823		-	-	-		0.482447	-	-		0.434096	-1.20392	-0.747975	0.648762
XRCC1	2525	+	1		5.84682	0.0471517	5.89397		2.37709	2.67638	0		1.8893	0.681922	0.637217		1.57117	0.651841	4.59366	0.441846
CG3309	2676	-	1		2.6405	0.28291	2.92341		0.658753	0.192688	1		1.50271	0.720119	0.942208		0.735914	-0.44239	3.713	0.557763
Mcm3	2891	+	1		1.69746	0.707276	2.40474		2.38963	2.69848	0		0.875589	0.67955	1.14558		0.931472	-0.102416	5.07733	0.916884
Rnp4F	3799	-	1		3.49021	1.03734	4.52755		0.846639	0.754592	0		1.36199	0.871805	0.901231		1.14215	0.191754	4.72122	0.831807
Sas10	1643	+	1		2.02752	2.45189	4.47941		1.3932	1.09184	1		1.03365	0.689691	0.87017		1.47115	0.556942	4.18885	0.448022
CG15930	2166	-	1		0.0660124	0	0.0660124		-	-	-		-	0	-		2.90182	1.53696	-0.487769	0.250995
CG4198	1970	+	1		0	0.0157172	0.0157172		-	-	-		-	-	-		1.10154	0.139523	0.00285522	1
dhd	750	+	1		0	0	0		-	-	-		0.964895	1.92507	-		1.4065	0.49211	4.05561	0.758738
TrxT	1308	-	1		0	0.112827	0.112827		-	-	-		-	0.962535	-		2.20425	1.14029	0.354479	0.506882
snf	1255	+	1		1.74461	0	1.74461		1.08445	0.294568	1		0.996427	0.756961	1.52762		1.2109	0.276083	7.05046	0.719613
Cdk7	1473	-	1		1.93322	0	1.93322		0.792072	0.219301	1		1.56166	0.956161	1.19202		0.997105	-0.00418274	5.18326	1
CG17764	1157	-	1		1.60316	0.00577032	1.60893		-	-	-		0.321632	0.673775	1.26425		3.04818	1.60795	-0.361414	0.360357
CG3323	2731	-	1		2.54619	0	2.54619		0.747	1.16401	0		1.98655	0.688973	1.10376		0.937479	-0.0931423	1.76807	0.933777
CG42749	10208	+	1		0.0314345	3.53638	3.56781		2.21485	3.92628	0		-	-	-		0.942205	-0.0858878	-0.00498619	1
CG15464	530	+	1		0.0117879	0	0.0117879		0.401416	0.70736	0		0	0	-		0.371695	-1.42781	0.0204711	0.410101
CG5062	2189	-	1		0	0.0471517	0.0471517		2.39648	2.92553	0		-	1.92507	1.80215		1.30426	0.383231	2.21293	0.755716
CG15465	11178	+	1		0.346308	0.0995426	0.44585		0.681212	0.569496	0		0.844283	0.240634	0.537993		0.802107	-0.318133	2.21611	0.804434
CG6789	1092	+	1		0.0471517	0	0.0471517		-	-	-		-	-	1.35538		0.556637	-0.845191	-1.18813	1
rg	165318	+	1		63.462	144.909	208.371		0.706251	0.614049	0		1.82822	0.475469	0.8358		0.563347	-0.827905	2.37593	0.372415
CG32767	9733	-	1		36.7453	0.163066	36.9084		1.08217	0.94253	0		1.45222	0.656247	1.08011		0.7808	-0.356975	6.03455	0.696928
ovo	22633	+	1		20.2113	17.6213	37.8326		1.13841	1.31446	0		2.65346	1.47818	1.68143		0.913557	-0.130434	2.24122	0.92625
svr	12604	+	1		28.6211	0.0943035	28.7154		0.671855	0.361444	1		2.19668	0.717037	1.22435		0.688642	-0.538174	5.72402	0.473904
CG17778	1470	+	1		0.235759	0.0471517	0.28291		-	-	-		-	1.92507	-		0.735541	-0.443123	-0.784604	1
CG17896	2708	-	1		1.55601	0.0471517	1.60316		0.955581	0.613634	1		1.455	1.17819	0.970466		1.00273	0.00393147	4.36322	1
CG3156	2796	+	1		0.612973	0	0.612973		0.803419	0.477703	1		1.5378	0.838645	1.14373		0.790132	-0.339835	3.33159	0.680383
CG18273	4778	-	1		2.13755	0.188607	2.32615		1.55852	0.607796	1		1.54112	0.632494	0.942425		1.77578	0.828455	4.22547	0.251431
CG3176	797	+	1		0.34185	0.129667	0.471517		1.18091	0.279845	1		1.3808	0.896281	1.36114		1.47946	0.56507	8.0416	0.578534
CG32817	721	+	1		0.412578	0.223971	0.636548		1.28336	0.404417	1		1.32619	0.9146	0.995134		1.49191	0.57716	7.97953	0.572884
CG13373	1204	+	1		0.153243	0.860519	1.01376		0.907381	0.121954	1		0.830785	0.720051	0.915894		1.23213	0.30115	6.48026	0.71875
Exp6	5541	-	1		11.0807	0.0943035	11.175		1.03203	0.732705	1		2.0638	0.806257	1.06228		0.977399	-0.0329802	5.28379	0.959525
Cyp4g1	2277	-	1		0.0471517	0.0471517	0.0943035		-	-	-		-	-	0.548522		1.39504	0.480302	-0.678739	0.745977
ase	2677	+	1		0.565821	0	0.565821		-	-	-		0	0.385014	0.258333		0.743815	-0.426985	0.731968	0.750058
pcl	1304	-	1		0.00523908	0.188607	0.193846		-	-	-		0	-	0.677688		0.491084	-1.02596	-1.06391	1
l(1)sc	1095	+	1		0.0943035	0	0.0943035		-	-	-		-	1.4438	4.47043		13.0026	3.70073	-0.964748	0.211432
CG12680	648	+	1		0	2.49904	2.49904		0.608436	0.371516	1		1.12571	0.588216	0.209677		0.630373	-0.665721	2.36046	0.392748
SIP3	1074	-	1		0.330062	0	0.330062		-	-	-		0.321632	1.20317	1.73226		1.99863	0.99901	1.65861	0.452705
Ptp4E	16294	+	1		6.22832	0.427734	6.65605		0.889928	0.3511	1		1.076	0.546025	0.923417		0.911943	-0.132984	5.34725	0.857794
CG4068	11383	-	1		38.1968	0.404719	38.6016		1.14056	0.599821	1		2.68576	1.15343	1.33804		1.08421	0.116648	6.11735	0.885823
CG6903	2919	+	1		2.16898	0.188607	2.35759		0.692244	0.0961462	1		1.09233	0.943475	1.14577		0.792718	-0.335121	5.53289	0.612108
CG4041	3166	-	1		3.3242	0.0471517	3.37135		0.567243	0.0635511	1		0.655876	0.589846	0.903532		0.684511	-0.546855	5.97578	0.455238
CG32772	5814	+	1		5.79966	0.925972	6.72564		1.30942	0.647119	1		2.24105	0.764619	1.24531		1.62154	0.697363	6.39926	0.417549
CG6927	1910	+	1		0.0471517	0.0943035	0.141455		-	-	-		-	0.962535	-		1.58832	0.667502	-0.664014	0.779201
CG12681	1594	+	1		0	0.0117879	0.0117879		-	-	-		-	-	1.25806		0.0828732	-3.59295	-1.02489	0.388846
CR43495	383	-	1		0	0	0		-	-	-		-	-	-		1	5.13e-15	-1.36554	1
CG42594	64919	+	1		0.330202	4.11567	4.44587		-	-	-		0	0.385014	16.1441		1.35258	0.435718	0.087108	0.821351
CG12682	860	+	1		0	0.0471517	0.0471517		-	-	-		-	-	-		1.19522	0.257278	-0.864662	1
CG2861	7502	-	1		0.416205	0.168399	0.584604		2.13392	1.07861	1		3.04313	0.984312	1.67978		2.49191	1.31725	4.95744	0.0777416
CG6978	1440	+	1		0	0	0		-	-	-		0.964895	0.27501	1.72376		1.17422	0.231697	2.1928	0.914319
CG15471	577	-	1		0	0	0		-	-	-		-	-	-		0.370285	-1.43329	-1.28275	1
CG2871	1418	-	1		0	0	0		-	-	-		-	-	-		0.370794	-1.43131	-1.28275	1
Bteb2	962	-	1		0	0.0471517	0.0471517		-	-	-		-	-	-		0.491145	-1.02578	-1.06391	1
CG15472	979	-	1		0	0	0		-	-	-		-	-	-		0.0562466	-4.15209	-0.87801	0.158306
Proc-R	21577	+	1		0.112247	0.150005	0.262252		0.203441	0.181207	0		1.92979	0.776238	1.14068		0.227879	-2.13366	0.352963	0.101523
CG7024	2196	+	1		0.235759	0.0471517	0.28291		-	-	-		1.22805	1.18466	0.675832		0.679766	-0.556891	0.110978	0.869651
l(1)G0334	2852	+	1		4.0079	0	4.0079		1.17226	0.765109	1		1.83149	0.84209	1.15871		1.35152	0.434588	5.50904	0.542728
ctp	14243	+	1.11717		23.5857	0.212183	23.7979		0.999217	0.190703	1		2.17261	0.887168	1.21088		0.990368	-0.0139637	9.55913	0.987615
Pp2C1	6472	-	1		5.89397	0.259335	6.1533		0.763717	0.272929	1		1.42701	0.658494	0.994234		0.757065	-0.40151	5.69633	0.594067
rap	12305	-	1		9.31101	0.190965	9.50197		0.915513	0.536128	1		1.72833	1.06589	1.14047		0.860092	-0.217438	4.29556	0.780986
CG3009	8540	-	1		0.0471517	0.436154	0.483305		-	-	-		-	2.24592	4.97204		1.24778	0.319361	0.385392	0.874684
CG15473	2396	-	1		0.0235759	0	0.0235759		-	-	-		-	-	-		3.13378	1.6479	-0.842339	0.58155
Cbp80	8239	+	1		4.47941	0.0235759	4.50299		1.98616	1.38855	1		2.67202	0.875032	1.25479		1.73982	0.798935	5.23175	0.334684
torp4a	1243	-	1		1.74461	0.707276	2.45189		0.592607	0.0736645	1		1.1819	0.824488	1.50014		0.697403	-0.519935	7.65264	0.487213
mRpL30	772	+	1		1.69746	0.565821	2.26328		0.762882	0.184178	1		1.11872	0.769452	0.574856		0.875625	-0.191615	8.35626	0.814525
HLH4C	2288	-	1		0	0.0471517	0.0471517		-	-	-		-	0	-		0.297427	-1.74939	-0.910079	0.639903
CG3062	3602	-	1		0	0	0		-	-	-		-	-	-		0.206185	-2.27799	-1.26383	1
CG3081	1752	-	1		0	0	0		-	-	-		-	-	-		1	5.13e-15	-1.36554	1
pon	2783	+	1		1.03734	0	1.03734		1.76969	1.32365	1		1.48216	0.800052	1.03273		2.11054	1.07761	5.12483	0.155167
CG12179	4944	-	1		2.44403	0.12731	2.57134		1.4604	1.52001	0		1.69796	0.74797	1.00804		1.20609	0.270334	3.66887	0.752195
CG12184	3557	-	1		0.919459	0	0.919459		1.72068	1.24434	1		1.56795	0.632778	0.968313		1.16991	0.226403	2.19493	0.840155
peb	8650	+	1		0.0722993	0	0.0722993		-	-	-		0	0.360951	0.636482		0.448115	-1.15806	0.15617	0.442081
CG12684	939	-	1		0.0471517	0	0.0471517		-	-	-		-	-	-		1	5.13e-15	-1.36554	1
CG3546	1931	+	1		0.00248167	0	0.00248167		-	-	-		-	-	-		1.18852	0.249164	-0.688966	1
CG11444	1077	-	1		2.40474	1.2731	3.67784		0.893901	0.289923	1		1.15503	0.956956	1.13173		0.966955	-0.0484789	6.12132	0.951372
CG3527	1040	+	1		0.471517	0.612973	1.08449		0.832366	0.179192	1		1.03799	0.871073	1.16637		0.944506	-0.0823677	6.29613	0.917807
CG11436	1998	-	1		1.98037	0.518669	2.49904		0.718766	0.294616	1		1.38155	0.750323	0.981317		0.694857	-0.525212	4.6914	0.469648
CG15912	888	+	1		0.612973	0.660124	1.2731		0.667619	0.180245	1		0.918948	0.577521	-		1.01102	0.0158137	3.08485	0.989662
Usf	4155	-	1		12.8909	0	12.8909		1.04387	0.40959	1		1.58567	0.862963	1.41276		1.16425	0.219395	5.27846	0.731961
CG3568	1868	+	1		0.0471517	0.377214	0.424366		0.680609	0.147448	1		1.46398	0.760322	1.16975		0.705895	-0.502474	3.86191	0.510877
CHOp24	1529	+	1		1.93322	0.565821	2.49904		0.887772	0.102973	1		0.929522	0.853336	0.909669		1.15259	0.204879	8.84998	0.82117
rb	5002	-	1		12.1651	0	12.1651		0.632528	0.139372	1		1.22509	0.685605	0.694624		0.698682	-0.517292	4.95641	0.446011
CG3556	4884	+	1		0.385073	0.895883	1.28096		1.47942	1.26876	0		2.0504	1.40478	2.37223		1.14851	0.199768	2.8448	0.838924
bi	72535	+	1		0.0725096	0.285921	0.358431		-	-	-		0	0	-		0.862346	-0.213661	2.07572	0.902951
CG32773	223590	-	1		35.7327	10.5126	46.2453		3.04665	0.898904	1		4.82447	10.5879	1.25807		4.03251	2.01168	1.04984	0.110814
CG12688	1844	+	1		0.0740956	0.0111105	0.0852061		-	-	-		0.964895	0	-		0.804752	-0.313384	-0.310337	1
CR43614	4686	-	1		0	0	0		-	-	-		-	-	-		1	5.13e-15	-1.36554	1
CG3626	4718	+	1		0.612973	0.0943035	0.707276		1.84244	2.18201	0		2.01955	0.779195	1.52489		0.63511	-0.654921	3.28881	0.585063
CG12693	2224	-	1		0.0111105	0.0740956	0.0852061		-	-	-		-	0.962535	-		2.67036	1.41704	-1.28476	1
norpA	42255	+	1		21.3376	0.0464743	21.384		0.851895	0.757481	0		1.58243	0.623989	0.858124		0.825189	-0.277203	4.27491	0.710817
mRpL33	438	-	1		0.471517	0	0.471517		1.02461	0.483968	1		0.972836	1.09261	1.75968		1.19585	0.258042	7.85802	0.795363
CG2982	2306	+	1		1.4617	0.235759	1.69746		0.99863	0.277943	1		1.24565	0.858972	1.04788		1.04732	0.0666991	4.59115	0.930545
mei-9	4572	-	1		2.09039	0	2.09039		0.977415	0.409289	1		1.07876	0.68633	1.14317		1.04037	0.0570932	3.91524	0.938034
CG15579	436	-	1		0.70875	0	0.70875		-	-	-		1.20612	0.82503	-		1.44542	0.53149	1.6542	0.672196
CG12692	2195	-	1		0.80158	0.353638	1.15522		-	-	-		-	-	-		0.205799	-2.28069	-1.26383	1
CG15578	415	-	1		0.00673596	0	0.00673596		-	-	-		-	-	-		9.94195	3.31353	-1.16797	0.430227
CG15577	508	-	1		0.0471517	0	0.0471517		-	-	-		-	-	-		6.16231	2.62347	-1.06958	1
CG15572	2383	+	1		0	0.0943035	0.0943035		-	-	-		1.66664	0.46953	0.867093		1.14274	0.192501	2.74412	0.884344
CG12691	573	+	1		0	0.0943035	0.0943035		43.6952	49.7182	0		0.979085	0.614542	0.78113		3.07541	1.62078	4.9459	0.129029
CG15576	921	-	1		0.330062	0	0.330062		0.419289	0.0850031	1		-	0.192507	0.46985		0.488757	-1.03281	2.25135	0.270202
CG43135	281	+	1		0	0.141455	0.141455		-	-	-		-	-	-		1	5.13e-15	-1.36554	1
CG43134	473	+	1		0	0.0943035	0.0943035		-	-	-		-	-	-		0.0839982	-3.5735	-1.07709	0.196879
Muc4B	1668	-	1		0.141455	0	0.141455		0.969634	0.372813	1		-	0.481268	1.09326		1.11904	0.162261	3.69037	0.881069
Femcoat	861	-	1		0.0471517	0	0.0471517		-	-	-		-	0.481268	0		1.15036	0.202091	0.510334	0.812303
CG15570	4958	+	1		0	0.0943035	0.0943035		-	-	-		-	-	-		18.9553	4.24453	-1.00624	0.2167
CG15571	534	-	1		0	0.0471517	0.0471517		-	-	-		-	-	-		4.78837	2.25954	-1.26422	1
CG43288	365	+	1		0	0.0471517	0.0471517		-	-	-		-	-	-		0.371855	-1.42719	-1.28275	1
Fas2	71714	-	4.61163		112.038	2.19168	114.229		0.903427	0.576902	1		3.88102	0.73767	0.976545		1.08318	0.115279	7.13322	0.89197
GlcAT-I	1617	+	1		5.13954	2.45189	7.59143		0.937691	0.0906774	1		1.74816	0.851801	1.00676		1.13533	0.183111	4.75267	0.790178
tyf	11928	+	2.66809		28.0474	9.94259	37.99		1.37415	0.99276	1		1.52675	0.747195	1.03603		1.38085	0.46556	6.06489	0.507461
Tip60	2643	-	1		3.46565	2.56977	6.03542		1.04209	0.434071	1		2.02509	0.843213	0.95553		1.0459	0.0647509	4.13176	0.929966
dgt4	712	+	1		1.20237	0.707276	1.90965		0.863057	0.177301	1		0.82632	0.977575	1.61371		1.12665	0.172041	5.8708	0.834497
CG6133	2579	-	1		2.6405	0.471517	3.11201		0.957897	0.309588	1		1.10339	0.77373	1.00815		1.00584	0.00840755	4.79547	0.995155
cib	4867	+	5.40295		39.9057	6.27118	46.1769		0.758308	0.248849	1		2.25249	0.74399	1.01143		0.888573	-0.170438	9.48523	0.829815
brn	1448	+	1		1.3674	0.188607	1.55601		0.817545	0.134783	1		1.34637	0.920226	0.665524		0.971395	-0.0418695	3.65377	0.96969
Xpac	1184	-	1		1.08449	0	1.08449		0.681194	0.166001	1		0.964895	0.729194	1.04194		0.800214	-0.321542	5.45119	0.624363
CG15375	1148	+	1		0	0.0943035	0.0943035		0.308952	0.249512	0		0	0	-		0.402401	-1.31329	0.87801	0.251511
CG6379	3118	-	1		1.93322	0.0471517	1.98037		1.19605	0.531156	1		1.18873	0.798082	1.01591		1.4159	0.501718	4.62123	0.496782
CG15376	2690	+	1		0	0	0		-	-	-		-	0.962535	-		0.0655334	-3.93163	-1.07441	0.197808
CG43284	9179	+	1		0.0896725	0.0518669	0.141539		-	-	-		-	0.481268	-		1.03444	0.0488477	0.636367	1
CR43298	398	-	1		0	0	0		-	-	-		-	-	-		1	5.13e-15	-1.36554	1
sc	1438	+	1		0.0471517	0	0.0471517		2.35074	1.88219	0		2.17101	4.45173	10.4856		1.14265	0.19239	3.97965	0.872111
ac	917	+	1		0.0471517	0.424366	0.471517		-	-	-		-	-	1.24301		0.568515	-0.81473	-0.220624	0.742843
yar	4674	+	1		0	0	0		-	-	-		-	-	-		1	5.13e-15	-1.36554	1
y	4737	+	1		0	0.565821	0.565821		-	-	-		3.85958	2.31009	6.64946		0.881123	-0.182585	-0.443255	0.86087
CG43182	251	+	1		0	0	0		-	-	-		-	-	-		1	5.13e-15	-1.36554	1
CG43181	519	+	1		0	0	0		-	-	-		-	-	-		0.556559	-0.845393	-1.18813	1
CG32816	154062	-	1		30.7019	28.194	58.896		0.900642	0.74858	0		2.77407	1.56412	1.34222		1.27451	0.349938	3.43636	0.735554
Or1a	1435	+	1		1.50886	0.0471517	1.55601		-	-	-		-	-	-		0.5567	-0.845027	-0.379322	0.645665
CG12470	1259	+	1		0.0471517	0.19974	0.246892		-	-	-		-	0	-		1.41537	0.501178	-0.640104	0.822576
CG6414	2351	-	1		0	0.0471517	0.0471517		0.069773	0.0654921	0		-	0	0		0.0740875	-3.75463	2.32144	0.00317021
CG6428	3137	-	1		2.21613	0.287626	2.50376		0.693058	0.425008	1		1.23507	0.670858	1.23062		0.505549	-0.984076	3.11599	0.249038
lva	9210	-	1		26.9354	0.0943035	27.0297		1.70904	1.8259	0		2.29645	0.818797	1.03846		1.13392	0.181315	4.53315	0.8152
Vap-33-1	5128	+	1		12.4009	0.330062	12.731		0.961619	0.112683	1		1.71436	0.711384	0.739755		1.06703	0.0936062	8.91633	0.909955
CG32783	2848	+	1		1.10021	0.157172	1.25738		1.00988	0.457221	1		2.35233	0.949728	1.24668		0.990661	-0.0135371	4.44489	0.990053
CG32786	2848	+	1		1.10021	0.157172	1.25738		1.00988	0.457221	1		2.35233	0.949728	1.24668		0.990661	-0.0135371	4.44489	0.990054
CG32783	2848	+	1		1.10021	0.157172	1.25738		1.00988	0.457221	1		2.35233	0.949728	1.24668		0.990661	-0.0135371	4.44489	0.990053
CG32786	2848	+	1		1.10021	0.157172	1.25738		1.00988	0.457221	1		2.35233	0.949728	1.24668		0.990661	-0.0135371	4.44489	0.990054
CG2941	3487	+	1		2.77016	0.17289	2.94305		0.933181	0.246692	1		2.73132	0.771096	1.24945		0.942853	-0.0848947	4.69856	0.926999
CG2938	4096	-	1		8.77022	0.330062	9.10028		0.937294	0.301713	1		1.77443	1.07397	1.0201		0.950646	-0.0730201	5.98722	0.920206
CG42541	16729	-	1		3.7768	0.141455	3.91826		0.752254	0.432953	1		1.37312	0.382955	0.699856		0.868093	-0.204078	3.62587	0.821602
CG15239	6316	+	1		0.0471517	0.518669	0.565821		0.32489	0.430743	0		0	0.525019	0.658961		0.353511	-1.50017	-0.0608516	0.16741
VhaAC39-1	2224	+	1		21.5955	0	21.5955		0.675679	0.131098	1		1.77238	0.954447	1.39061		0.810223	-0.303609	8.04661	0.700218
CG2930	7876	+	1.23434		0.0943035	0.141455	0.235759		0.574524	0.173727	1		0.846745	0.549493	0.961051		0.644587	-0.633553	5.24394	0.312536
CG34336	778	-	1		0	0	0		-	-	-		-	0.481268	-		1.09877	0.135888	-1.16661	1
yin	5364	-	1		0	0.0943035	0.0943035		0.855465	0.746654	0		1.41896	1.02029	1.46498		0.922158	-0.116914	2.71718	0.916102
roX1	3792	-	1		0	0	0		-	-	-		-	-	-		1	5.13e-15	-1.36554	1
CG2901	3311	+	1		0.28291	0.235759	0.518669		-	-	-		-	-	3.42204		0.491107	-1.02589	-1.06391	1
ec	45681	+	1		35.5999	3.42937	39.0293		1.73835	1.34259	1		2.99625	0.718464	1.13004		1.65087	0.723228	4.47236	0.379924
fd3F	6329	+	1		0.0151559	0.0471517	0.0623077		-	-	-		-	-	0.172222		0.230987	-2.11411	-0.637056	0.274675
CG32779	1197	+	1		0.0235759	0	0.0235759		-	-	-		-	-	-		0.393915	-1.34404	-0.328047	0.509282
CG42499	1197	+	1		0.0235759	0	0.0235759		-	-	-		-	-	-		0.393915	-1.34404	-0.328047	0.509255
HIP	2427	+	1		3.50102	0	3.50102		1.26532	0.604862	1		2.35791	0.768266	1.09874		1.2205	0.287469	6.58249	0.770057
Crg-1	2473	+	1		0.861449	0.00888848	0.870337		0.748591	0.462426	1		0.395715	0.93301	0.516667		0.877723	-0.188163	3.03182	0.819774
CG32779	1197	+	1		0.0235759	0	0.0235759		-	-	-		-	-	-		0.393916	-1.34404	-0.328047	0.509356
CG42499	1197	+	1		0.0235759	0	0.0235759		-	-	-		-	-	-		0.393916	-1.34404	-0.328047	0.509294
HIP-R	2509	+	1		6.78592	0	6.78592		1.08136	0.510225	1		1.80911	0.734457	0.994435		1.08346	0.115646	6.60453	0.904391
tlk	68798	+	1.29713		85.9222	3.03457	88.9568		0.73664	0.12928	1		1.23509	0.781438	1.18278		0.829892	-0.269004	7.41584	0.745772
Rala	14649	-	1		19.4879	0.618867	20.1068		0.856072	0.131469	1		2.05359	0.963668	1.16148		0.823482	-0.280191	6.2911	0.741523
Mnt	31485	+	1		35.4843	0.764251	36.2486		0.842193	0.33461	1		0.915158	0.614953	0.906606		0.927338	-0.108833	5.31139	0.885316
Parg	2666	-	1		1.2731	0	1.2731		1.19435	0.454193	1		2.40525	0.880501	1.10448		1.00586	0.00842901	4.25042	1
Ilp7	1225	+	1		0.00943035	0.0471517	0.0565821		-	-	-		-	-	-		0.520774	-0.941271	-1.07416	1
AlstR	92189	+	1		0.921667	1.07155	1.99321		-	-	-		-	0.962536	-		1.26564	0.339868	-0.527947	0.849056
CG2875	1900	-	1		1.2731	0	1.2731		2.02823	2.04704	0		2.56987	1.05294	0.967816		1.01766	0.0252488	4.12699	0.980772
CG32792	14189	+	1		2.21613	6.90773	9.12386		-	-	-		0	-	0.419355		1.11202	0.153178	-0.733406	1
CR34335	249	-	1		0	0	0		-	-	-		-	-	-		1	5.13e-15	-1.36554	1
CG13021	1745	+	1		0.565821	0.238532	0.804353		-	-	-		-	0.481268	1.06519		0.700698	-0.513135	-0.370866	1
CG32791	19328	-	1		37.4931	8.99917	46.4923		0.71686	0.275051	1		0.964895	0.561479	0.982372		1.35137	0.43442	5.18795	0.696352
Gas8	13843	-	1		0.141455	1.9568	2.09825		-	-	-		-	0.962535	-		2.26486	1.17942	0.599593	0.421945
CG10803	3255	+	0.667147		7.44997	0.28291	7.73288		2.13623	3.11189	0		1.69509	0.762985	0.968524		0.871934	-0.197709	4.08535	0.855699
CG14270	775	-	1		0.660124	0.28291	0.943035		0.766783	0.208626	1		1.2696	0.827443	1.45269		0.850387	-0.233809	7.3222	0.776267
CG10802	1592	+	1		1.69746	0.0471517	1.74461		0.702286	0.131235	1		1.21881	0.87446	0.949984		0.657194	-0.605609	5.78417	0.541377
CG10804	5636	-	1		0.188607	10.8469	11.0355		-	-	-		-	-	6.55215		3.60459	1.84984	0.255267	0.115107
CG12206	8784	-	1		1.43813	16.4418	17.8799		1.64086	1.73922	0		3.98019	1.71582	2.03011		1.54029	0.623205	2.77441	0.489113
CG16781	1571	-	1		0	2.6405	2.6405		0.448852	0.152583	1		0.81645	0.387165	0.748835		0.505472	-0.984296	4.54652	0.128928
CG10801	1873	+	1		3.39492	0.141455	3.53638		0.259718	0.519436	0		-	1.4438	0.889937		0.315674	-1.66349	0.357322	0.112315
CG16782	1225	-	1		0.0565821	0.28291	0.339492		-	-	-		0	-	0		0.133016	-2.91033	-1.11256	0.572565
CG14269	835	-	1		0	0.518669	0.518669		-	-	-		0.964895	0.481268	-		1.26641	0.340749	-0.225856	0.934575
CG12535	56458	-	1		9.20411	20.2121	29.4162		-	-	-		0	0.427794	-		1.06639	0.0927342	-0.010243	1
dm	12831	+	2.61004		45.1726	0.141455	45.314		0.89459	0.291316	1		0.790898	0.615825	1.02599		1.04774	0.0672774	4.90704	0.930164
CG10793	1659	-	1		0.0471517	0.471517	0.518669		-	-	-		-	-	-		2.54414	1.34718	-0.723341	1
Sgs4	1540	+	1		0.776432	0	0.776432		-	-	-		-	0	1.12535		0.311234	-1.68393	0.119029	0.384888
Pig1	692	-	1		0	0.707276	0.707276		-	-	-		-	-	-		1.2337	0.302997	0.485898	0.911969
ng4	237	-	1		0	0.518669	0.518669		-	-	-		-	-	-		0.206507	-2.27573	-1.26383	1
ng1	523	+	1		0.589397	0.28291	0.872307		-	-	-		-	-	0.419355		0.478646	-1.06297	-0.8204	0.751863
ng3	594	-	1		0	0.235759	0.235759		-	-	-		-	-	-		1	5.13e-15	-1.36554	1
ng2	547	-	1		0.589397	0.377214	0.966611		-	-	-		-	-	-		0.478642	-1.06298	-0.8204	0.751845
CG14265	559	-	1		0	0.235759	0.235759		-	-	-		-	-	-		1	5.13e-15	-1.36554	1
dnc	162886	+	1.70302		156.821	7.88308	164.704		0.806009	0.161393	1		1.72665	0.792175	1.06519		0.915775	-0.126934	4.47696	0.867845
CG3939	1105	+	1		1.62673	0.28291	1.90965		1.03563	0.0770064	1		1.06297	0.936753	1.33065		1.3258	0.40686	8.58766	0.711031
Fcp3C	1019	-	1		0.141455	0.0943035	0.235759		-	-	-		1.92979	1.4438	-		0.64424	-0.63433	0.668501	0.629859
CG18508	686	-	1		0.28291	0.0471517	0.330062		0.890074	0.411403	1		1.587	0.794651	0.585435		0.86058	-0.216619	6.00801	0.795245
N	37391	+	18.9447		43.3021	0.477411	43.7795		1.19091	1.17769	0		1.59687	0.760029	1.06052		0.789991	-0.340092	7.25307	0.671972
CG4116	795	-	1		0	0	0		-	-	-		-	-	0.678798		0.250342	-1.99803	-0.0562515	0.244406
CG13375	8562	-	1		0.117879	0.0833575	0.201237		-	-	-		8.68405	1.97855	3.48709		1.76932	0.823192	1.16903	0.49837
CG3777	70502	+	1		765.241	25.762	791.003		0.621234	0.357868	1		1.8507	0.662295	0.815872		0.72108	-0.471768	5.15911	0.505248
ewg	11126	-	1		7.90072	0.914744	8.81547		1.54873	0.336981	1		2.23449	0.685807	1.42331		1.41673	0.502562	5.33242	0.54251
CG13376	956	-	1		0	0.0943035	0.0943035		-	-	-		-	0.320845	-		1.07898	0.109666	0.51635	1
CG13377	5663	-	1		1.01376	2.14969	3.16345		-	-	-		3.61836	1.73256	2.18656		1.0772	0.10728	1.75785	0.93127
cin	3561	+	1		2.02752	0.424366	2.45189		0.891379	0.205201	1		1.31403	0.762687	1.05707		1.03205	0.0455084	7.51655	0.951191
CG42376	3516	+	1		1.79177	0.28291	2.07468		0.891033	0.211883	1		1.30563	0.755173	1.05676		1.03307	0.0469438	7.50929	0.949704
G9a	8009	+	1		3.67784	0	3.67784		1.2025	0.69206	1		2.31946	0.619853	1.13903		1.19647	0.258788	4.39035	0.761948
CG3038	1793	-	1		1.22595	0.235759	1.4617		0.752168	0.088522	1		1.48024	0.903789	1.2753		0.809829	-0.304312	6.62002	0.706145
CR40976	345	-	1		0	0	0		-	-	-		-	-	-		1	5.13e-15	-1.36554	1
CR41602	6026	+	1		1020.56	1060.37	2080.93		-	-	-		0	0	3.24335		8.57696	3.10047	-1.04965	0.564257
CR40677	931	+	1		0	0	0		-	-	-		-	-	-		1	5.13e-15	-1.36554	1
ATbp	2307	+	1		3.53638	0.471517	4.0079		1.00733	0.920439	0		2.24284	0.858878	0.69354		0.739434	-0.435507	3.0764	0.601514
su(f)	11055	+	1		2.9627	20.0763	23.039		1.10156	0.402952	1		2.06974	1.05093	1.18179		1.21417	0.279972	5.26765	0.724451
CR43480	3286	+	1		0	0	0		-	-	-		-	-	-		1	5.13e-15	-1.36554	1
CG17162	11005	-	1		56.1341	5.53247	61.6666		0.608067	0.313397	1		1.72267	0.767835	1.00365		0.67385	-0.5695	6.14376	0.516307
CG17159	7672	-	1		42.0933	5.68178	47.775		0.5975	0.316889	1		1.71872	0.762582	1.02825		0.666305	-0.585746	6.12687	0.505205
CG17169	865	+	1		0.754428	1.88607	2.6405		-	-	-		-	-	0.726344		1.00123	0.00177687	-0.342972	0.847932
CG17168	1810	+	1		1.41455	0.0943035	1.50886		1.43365	0.652998	1		1.77463	0.837688	1.07693		1.23394	0.30327	4.71704	0.733801
CG17163	1838	-	1		4.47941	0.141455	4.62087		0.761079	0.213263	1		2.51332	0.877855	1.21514		0.806593	-0.310087	4.2279	0.680137
CG17167	12463	+	1		0.751711	0.622912	1.37462		1.56781	1.07634	1		1.92979	1.0736	1.81808		1.36294	0.446727	3.42023	0.58733
CG12061	11561	+	1		1.17395	2.52002	3.69397		-	-	-		-	-	-		0.427993	-1.22434	-1.11481	0.571187
CG2893	11034	+	1		4.7498	4.39048	9.14028		1.30856	0.970622	1		0.241224	0.283099	-		0.726601	-0.460766	1.56649	0.736571
CG13865	1660	+	1		14.4284	0	14.4284		0.770271	0.210857	1		1.53641	0.739984	0.91395		0.755751	-0.404017	6.24448	0.590264
Rab21	1120	-	1		0.660124	0	0.660124		0.803612	0.268391	1		0.822999	1.00837	1.10114		1.07309	0.101765	5.83686	0.905241
FucTC	1969	-	1		0.00277363	0.943035	0.945808		-	-	-		3.85958	1.4438	-		5.73452	2.51967	-0.710962	0.37593
stnA	23926	-	1		0.868548	4.5509	5.41944		-	-	-		1.60816	0.842219	2.28387		0.820206	-0.285942	-0.553573	1
stnB	23926	-	1		0.868548	4.5509	5.41944		-	-	-		1.60816	0.842219	2.28387		0.8202	-0.285952	-0.553573	1
CG40485	1752	-	1		0.28291	2.07468	2.35759		0.418377	0.178681	1		1.05582	0.883933	1.25383		0.543372	-0.879988	10.0908	0.42188
CG40486	1201	-	1		0	0.990186	0.990186		-	-	-		2.89468	1.92507	1.25806		0.817339	-0.290993	-0.36803	1
CG41106	1021	+	1		0	0.754428	0.754428		-	-	-		-	0	-		0.115084	-3.11924	-1.04354	0.567313
CG34334	2556	+	1		0.565821	0.0943035	0.660124		-	-	-		1.18756	0.717901	1.11112		1.3988	0.484195	2.93816	0.684335
CG42346	17583	+	1.11717		86.8644	0.920076	87.7845		1.33437	1.73636	0		4.24554	0.51566	1.24167		0.691739	-0.531701	2.58995	0.593075
fog	29023	-	1		5.8621	72.0776	77.9397		1.08785	0.992069	0		2.77407	1.32349	1.22492		0.774204	-0.369214	2.31666	0.717944
CG12446	2649	-	1		0	4.33796	4.33796		-	-	-		-	-	-		0.20578	-2.28082	-1.26383	1
Cda4	49078	-	1		23.6583	38.0528	61.711		-	-	-		1.92979	0.64169	-		0.682144	-0.551852	-0.114821	0.701219
CG17601	960	+	1		0	0	0		-	-	-		-	-	-		1.78083	0.832554	-1.18635	1
CG17599	1774	-	1		0.0471517	0.0471517	0.0943035		-	-	-		0.964895	0.160423	0		0.321808	-1.63573	-0.512818	0.512279
CG17598	3923	-	1		1.60316	0.28291	1.88607		1.21311	0.331822	1		2.50651	0.918584	1.25189		1.38846	0.473491	4.17359	0.555977
S6kII	4117	+	1		1.50886	1.3674	2.87626		0.674365	0.327334	1		1.97365	0.671959	0.840808		0.738284	-0.437752	2.79695	0.636527
CG17600	26826	+	1		5.57275	10.4164	15.9891		0.835043	0.211283	1		1.02565	0.586967	0.726381		1.05325	0.0748423	7.17279	0.919659
CR43493	3019	-	1		0	0	0		-	-	-		-	-	-		1	5.13e-15	-1.36554	1
l(1)G0196	20487	+	1		18.2269	0	18.2269		0.972171	0.520468	1		2.48915	0.749104	1.4084		1.05773	0.0809666	5.56135	0.91565
Cp110	5058	+	1		1.9568	0	1.9568		0.738968	0.512194	1		1.35729	0.806831	0.976637		0.829585	-0.269539	4.00971	0.731879
CG12576	7243	-	1		7.74236	6.18768	13.93		0.677943	0.218271	1		1.36546	0.787743	0.951155		0.799817	-0.322257	6.85392	0.690634
CG14618	1268	+	1		1.98037	2.45189	4.43226		0.714906	0.236491	1		1.03994	0.744228	1.28097		0.812761	-0.299097	4.19892	0.668097
CG14613	1755	-	1		1.3674	0.0471517	1.41455		0.638271	0.101412	1		1.25595	0.804034	1.35002		0.736947	-0.440367	4.78044	0.501004
CG14619	12671	+	1		7.05933	0.0943035	7.15363		0.892035	0.671542	1		1.69393	0.624567	0.896315		1.0123	0.0176395	4.30022	0.989198
CG14614	3873	-	1		13.8155	0.0943035	13.9098		0.688898	0.304933	1		1.43476	0.843349	0.971181		0.73357	-0.446994	7.06282	0.61484
tilB	1727	+	1		0.0943035	0.565821	0.660124		-	-	-		-	1.92507	0.258333		0.91529	-0.127699	0.648969	1
CG14615	1748	-	1		0.518669	1.3674	1.88607		0.52921	0.449237	0		0.560262	0.499092	0.722427		0.60105	-0.734443	2.45141	0.530927
CG14621	2428	+	1		2.12183	0.0172161	2.13904		1.20905	0.978299	0		2.96891	0.818534	1.17145		0.957827	-0.0621634	3.12517	0.942156
CG40813	715	+	1		0	0	0		-	-	-		-	-	-		1	5.13e-15	-1.36554	1
CG41562	715	+	1		0	0	0		-	-	-		-	-	-		1	5.13e-15	-1.36554	1
CG40813	715	+	1		0	0	0		-	-	-		-	-	-		1	5.13e-15	-1.36554	1
CG41562	715	+	1		0	0	0		-	-	-		-	-	-		1	5.13e-15	-1.36554	1
DIP1	5363	-	1		31.4183	0.716585	32.1349		1.42533	0.885952	1		4.59029	0.639776	1.50233		1.71622	0.779236	6.65989	0.309022
CG32500	2210	-	1		0.632619	0.265094	0.897713		0.845097	0.241012	1		1.03541	0.945883	1.25642		1.30552	0.384627	8.75484	0.705217
CG33502	2164	-	1		0.632619	0.265094	0.897713		0.845258	0.241372	1		1.03541	0.939221	1.25642		1.30611	0.385281	8.75451	0.704707
CG32857	2164	-	1		0.632619	0.265094	0.897713		0.845258	0.241372	1		1.03541	0.939221	1.25642		1.30611	0.38528	8.75451	0.70466
CG32819	3216	-	1		0.12338	0.199609	0.322989		0.74675	0.293662	1		1.53718	2.11455	4.20564		0.908973	-0.137691	2.16113	0.923266
CG32820	3216	-	1		0.12338	0.199609	0.322989		0.74675	0.293662	1		1.53718	2.11455	4.20564		0.908969	-0.137697	2.16113	0.923252
CG32500	2194	-	1		0.632619	0.265094	0.897713		0.845097	0.241012	1		1.03541	0.945883	1.25642		1.30552	0.384627	8.75484	0.705212
CG33502	2148	-	1		0.632619	0.265094	0.897713		0.845258	0.241372	1		1.03541	0.939221	1.25642		1.30611	0.385281	8.75451	0.704692
CG32857	2148	-	1		0.632619	0.265094	0.897713		0.845258	0.241372	1		1.03541	0.939221	1.25642		1.30611	0.38528	8.75451	0.70464
CG32819	3216	-	1		0.12338	0.199609	0.322989		0.74675	0.293662	1		1.53718	2.11455	4.20564		0.908974	-0.137688	2.16113	0.923272
CG32820	3216	-	1		0.12338	0.199609	0.322989		0.74675	0.293662	1		1.53718	2.11455	4.20564		0.908971	-0.137694	2.16113	0.923259
CG32500	2194	-	1		0.632619	0.265094	0.897713		0.845097	0.241012	1		1.03541	0.945883	1.25642		1.30552	0.384627	8.75484	0.705197
CG33502	2148	-	1		0.632619	0.265094	0.897713		0.845258	0.241372	1		1.03541	0.939221	1.25642		1.30611	0.385281	8.75451	0.704678
CG32857	2148	-	1		0.632619	0.265094	0.897713		0.845258	0.241372	1		1.03541	0.939221	1.25642		1.30611	0.38528	8.75451	0.704619
CG17450	2953	-	1		0.0998045	0.152457	0.252262		0.604484	0.441112	1		0.496232	1.31875	1.9387		1.16327	0.218192	1.64556	0.887739
CG14476	4668	-	1		6.34017	0.290769	6.63094		1.01095	0.77628	1		1.56911	0.852131	1.33527		0.985941	-0.0204263	6.54163	0.978586
CG32822	1856	+	1		158.239	0.00950959	158.249		-	-	-		2.89468	0.693504	0.819723		1.8675	0.901112	1.43345	0.467027
Cyp6t1	1736	-	1		0.424366	0.0943035	0.518669		1.07641	1.84653	0		1.92979	0.607917	2.45797		0.692763	-0.529567	1.68664	0.686845
Ir20a	1692	-	1		0.0471517	0.0471517	0.0943035		-	-	-		-	0	-		1.46559	0.551485	-0.362321	0.809999
CG10918	643	-	1		0	0.0471517	0.0471517		-	-	-		0	-	-		5.35524	2.42095	-1.26327	0.606086
CG42343	33147	-	1		1.16588	3.94005	5.10593		-	-	-		-	0	-		0.614592	-0.7023	-0.166431	0.740299
CG1678	366	-	1		0	0	0		-	-	-		-	-	-		1	5.13e-15	-1.36554	1
lcs	573	-	1		0	0	0		-	-	-		-	-	-		9.38505	3.23036	-1.16701	0.352015
mst	2025	+	1		1.32025	0	1.32025		0.699008	0.285993	1		1.10815	0.928677	1.29015		0.761812	-0.392493	4.42484	0.58672
Hlc	2423	-	1		2.59335	0.235759	2.8291		0.761439	0.348072	1		1.25856	0.748468	1.0792		0.750285	-0.414488	6.14766	0.597693
slgA	11171	+	1		32.016	0.612973	32.629		1.11952	0.484602	1		1.52987	0.771903	0.94664		1.22239	0.289705	4.80586	0.662145
bbx	10120	+	1		10.9864	0.0707276	11.0571		0.992518	0.605044	1		1.73542	0.842682	1.03491		0.987747	-0.0177864	5.3627	0.978217
waw	10120	+	1		10.9864	0.0707276	11.0571		0.988379	0.61633	1		1.73542	0.842682	1.0343		0.979271	-0.0302198	5.34427	0.962188
Sep1	3413	+	1		14.5699	0	14.5699		0.804419	0.0941306	1		1.5979	0.922375	1.11476		0.752673	-0.409906	7.81534	0.653638
sol	7583	+	1		6.08257	0.0707276	6.1533		0.716859	0.247598	1		1.14886	0.755076	1.11102		0.792754	-0.335056	6.19717	0.638919
pen	3337	-	1		2.59335	3.86644	6.45979		1.20415	0.480594	1		0.828654	0.792868	0.976565		1.27652	0.352217	4.93718	0.601379
dod	1511	+	1		4.85663	2.16898	7.02561		0.909102	0.186322	1		0.961373	0.971616	0.754435		1.29959	0.378052	8.67754	0.709287
fliI	5295	+	1		3.15917	0.141455	3.30062		1.32024	0.879206	1		2.12039	0.819673	1.0539		1.45688	0.542881	4.34392	0.430963
tty	7620	-	1		0.107401	0.00112266	0.108524		1.65158	0.773371	1		3.08766	0.658577	1.35538		1.55682	0.638602	1.80009	0.504333
CG1486	4104	+	1		11.7408	0	11.7408		0.582577	0.274228	1		1.08078	0.78617	0.835521		0.610364	-0.712259	5.72632	0.320115
Dd	4251	-	1		8.53446	0	8.53446		0.675219	0.106046	1		1.96195	0.722138	0.865747		0.687315	-0.540958	6.13566	0.52918
CG33714	1339	-	1		5.65821	0	5.65821		0.823681	0.171828	1		0.975723	0.756726	1.00743		0.92332	-0.115097	7.17143	0.869315
CG33713	1339	-	1		5.65821	0	5.65821		0.823681	0.171828	1		0.975723	0.756726	1.00743		0.92332	-0.115097	7.17143	0.869305
Pros45	1604	+	1		1.50886	0.0943035	1.60316		0.934941	0.356397	1		1.17992	1.05922	1.30416		0.893297	-0.162788	5.72876	0.852605
CG1801	9937	-	1		0.365437	1.43027	1.79571		-	-	-		3.21632	0.577521	1.96935		0.642929	-0.637269	0.349319	0.787377
CG1718	13952	-	1		5.3839	4.78804	10.1719		0.642951	0.277552	1		1.11173	0.526246	1.28651		0.624562	-0.679084	5.17316	0.383092
CG1494	6777	+	1		9.10028	0.424366	9.52465		-	-	-		0.321632	0.700026	3.77652		1.18623	0.246381	0.670446	0.915353
CG1722	1173	-	1		0.565821	0	0.565821		-	-	-		-	0	0.847116		0.357898	-1.48238	-0.802268	0.342209
CG32523	940	+	1		0	0.990186	0.990186		-	-	-		-	-	-		1	5.13e-15	-1.36554	1
CG32521	75862	-	1.11717		273.335	1.71913	275.054		0.631018	0.136085	1		1.03433	0.63805	1.19407		0.723684	-0.466568	7.50729	0.519652
CG1724	843	-	1		4.1965	0	4.1965		-	-	-		-	-	1.07581		0.100249	-3.31834	-1.02954	0.363587
CG14579	1269	+	1		0.0471517	0.754428	0.80158		0.713842	0.151974	1		2.41224	0.180475	1.06519		0.586347	-0.770174	2.33016	0.447849
CG34120	16302	+	1		16.2784	0.169971	16.4483		0.104992	0.209985	0		-	1.60423	1.35671		0.27212	-1.87768	0.932121	0.0741001
CG15445	3177	+	1		1.65031	0.0471517	1.69746		1.0964	0.464662	1		1.73789	0.927162	1.42658		1.18668	0.246927	5.1045	0.721904
unc	5094	-	1		0.734781	0.0471517	0.781933		0.916775	0.50372	1		1.11462	0.634398	1.22806		1.01706	0.0244041	2.10495	1
CG1503	1505	-	1		0.235759	0	0.235759		0.753652	0.127355	1		0.867321	0.906879	1.32498		0.936662	-0.0944001	6.44922	0.907494
CG15446	2856	-	1		0.0157172	0.129365	0.145082		-	-	-		-	0	-		0.91292	-0.13144	-0.74718	1
CG11566	17574	+	1		0.539093	0.543345	1.08244		1.03582	0.645942	1		1.45971	0.72389	1.5011		1.22543	0.293292	2.6926	0.753583
stg1	17574	+	1		0.539093	0.543345	1.08244		1.03582	0.645942	1		1.45971	0.72389	1.5011		1.22543	0.293292	2.6926	0.75355
CG32512	5150	-	1		43.0967	3.37135	46.468		0.620042	0.280876	1		2.08055	0.744474	1.10345		0.731812	-0.450455	4.9035	0.563298
bves	24931	+	1		21.9557	47.5525	69.5082		0.871177	0.299047	1		2.69574	0.760264	1.2485		0.925929	-0.111027	6.28446	0.895705
CG1518	4153	-	1		24.5661	0.0943035	24.6604		0.74094	0.148526	1		1.53983	0.896533	1.27895		0.826734	-0.274504	7.40922	0.704812
CG1753	3963	+	1		1.41455	0	1.41455		0.56737	0.228509	1		0.74679	0.706672	0.541424		0.573998	-0.800882	6.31821	0.339651
Mgstl	1619	+	1		0.542245	0.0471517	0.589397		0.826582	0.259118	1		0.807954	0.863305	0.815668		1.05893	0.0826094	7.89469	0.933466
CG15449	1092	-	1		0	9.71326	9.71326		-	-	-		0	0	-		4.2999	2.1043	-0.823881	0.194976
Ntf-2	3763	+	1		6.42957	0.189643	6.61921		1.06424	0.320946	1		2.62276	0.841157	1.15575		1.42284	0.508768	9.83765	0.570021
CG1529	3304	-	1		16.0729	0	16.0729		0.945635	0.295154	1		1.11661	0.933803	1.02176		1.01256	0.0180071	4.31059	0.987115
CG1532	2059	-	1		0.943035	0.0471517	0.990186		0.53796	0.0699362	1		1.0441	0.697838	0.827819		0.634175	-0.657047	5.21589	0.314937
r-cup	2499	-	1		0.424366	0	0.424366		-	-	-		2.89468	0.577521	1.13684		0.743902	-0.426815	1.26369	0.716027
CG11666	563	+	1		0	0	0		-	-	-		-	-	-		4.79199	2.26063	-1.26422	1
CG1304	896	-	1		0	0	0		-	-	-		0	0.481268	0.623011		0.498519	-1.00428	1.38797	0.49328
Ser6	899	-	1		0	0	0		0.16619	0.23982	0		0	0.588216	0.724738		0.354237	-1.49721	1.77068	0.17634
Npc1b	4429	+	1		0	0	0		1.75839	0.347131	1		2.89468	0.814453	1.62892		1.94187	0.95745	3.69649	0.307634
CG11227	2588	-	1		0	0.0943035	0.0943035		-	-	-		4.24554	0.505948	1.35943		0.570416	-0.809914	3.86906	0.552479
CG42707	813	-	1		0	0	0		-	-	-		-	-	-		0.137593	-2.86152	-0.996108	0.580435
CG1314	1409	-	1		0	0.0471517	0.0471517		0.259718	0.519436	0		-	-	0.419657		0.282196	-1.82523	-0.824712	0.124249
CG43193	919	+	1		0	0	0		-	-	-		2.41224	0	-		1.50373	0.588545	-1.13534	1
CG15450	3496	+	1		0	0	0		-	-	-		-	0.481268	0.675538		0.962934	-0.0544919	0.149508	0.880122
CG32507	582	-	1		0	0	0		-	-	-		-	-	1.00056		0.133019	-2.91029	-1.11256	0.572532
shakB	165980	-	1		5.57767	1.86483	7.4425		0.662622	0.1905	1		2.06763	0.410458	0.564342		0.668264	-0.581511	5.88357	0.468864
CG15452	879	-	1		0	0	0		-	-	-		-	-	-		1	5.13e-15	-1.36554	1
CG1324	1217	-	1		0	0	0		-	-	-		-	-	-		0.248038	-2.01137	-1.20491	1
run	2881	+	1		0	0	0		-	-	-		-	-	-		0.698627	-0.517406	-0.266116	0.831397
hydra	6232	-	1		0.0196697	0.0717992	0.0914689		0.341165	0.402113	0		3.85958	0.962535	-		0.259151	-1.94813	0.901624	0.0793608
CG1835	2508	+	1		0.235759	0	0.235759		2.59278	3.31417	0		-	0.64169	1.49014		1.97466	0.981605	0.666786	0.477876
Cyp6v1	3609	+	1		4.43226	0	4.43226		0.950635	0.401304	1		1.61318	1.13464	1.13435		0.955577	-0.0655567	4.76471	0.939046
RunxA	31612	-	1		0	0.144229	0.144229		0.62878	0.696193	0		-	0.385014	-		0.721821	-0.470287	2.53877	0.696272
CG42580	300	+	1		0	0	0		-	-	-		-	-	-		0.371401	-1.42895	-1.28275	1
RunxB	25141	+	1		0.33343	0.944382	1.27781		0.69328	0.267674	1		1.84207	1.73256	-		0.877482	-0.188558	3.79607	0.847914
CG42579	300	+	1		0	0	0		-	-	-		-	-	-		0.371422	-1.42887	-1.28275	1
Tak1	9021	-	0.667147		4.6695	3.01771	7.68721		1.08455	0.372792	1		1.55314	0.812883	1.2127		1.08099	0.112355	4.77966	0.883486
CG1812	4286	+	1		15.23	4.24366	19.4737		0.711081	0.283735	1		1.58167	0.827205	0.989891		0.756299	-0.402972	5.22505	0.585917
CG15461	409	+	1		0	0.612973	0.612973		-	-	-		-	0.962535	-		1.93895	0.955274	-1.18559	0.58374
RhoGAP19D	40740	-	1.46868		23.2861	0.668207	23.9543		1.2588	0.970158	1		1.86325	0.697706	1.1143		1.07521	0.104621	6.00048	0.897832
CG1702	2117	+	1		8.29871	2.59335	10.8921		1.06964	0.166888	1		1.62172	1.06691	1.33832		1.27658	0.352282	5.60378	0.664065
CG32506	16877	+	1		7.96864	1.54876	9.5174		0.594006	0.280986	1		0.82882	0.489425	0.543956		0.700002	-0.51457	3.61808	0.496251
CG42578	279	+	1		0	0	0		-	-	-		-	-	-		4.78679	2.25906	-1.26422	1
CG1695	4137	+	1		0.235759	0.117879	0.353638		1.28271	0.871481	1		0.771916	0.693026	0.713874		0.93934	-0.0902803	1.81912	0.926615
mal	3530	+	1		1.62673	0	1.62673		1.00774	0.495546	1		1.13911	0.908687	0.965939		0.840506	-0.250671	3.80206	0.780757
CG11710	2065	-	1		3.67784	0.0471517	3.72499		1.15554	0.734433	1		1.07606	0.793394	1.03303		0.914567	-0.128839	5.51287	0.874509
CG15456	569	-	1		0.565821	0.0471517	0.612973		0.957535	0.387406	1		1.13517	0.449183	0.726344		1.53304	0.616392	5.71742	0.562095
cactin	2423	+	1		1.3674	0	1.3674		0.955559	0.105443	1		1.08883	0.832518	0.917741		1.02772	0.0394421	5.30042	0.958632
Pp4-19C	2932	-	1		5.61106	0	5.61106		0.811925	0.280053	1		0.997914	0.888832	1.1954		0.819589	-0.287027	7.99679	0.722249
Pbprp2	1370	+	1		0	0	0		0.0649295	0.129859	0		-	0	-		0.156583	-2.675	-0.766215	0.11866
Obp19c	1044	-	1		0	0	0		-	-	-		0	0.962535	-		1.26075	0.334286	0.325074	0.820807
Obp19b	1088	+	1		0.0471517	0	0.0471517		-	-	-		-	-	-		1	5.13e-15	-1.36554	1
Obp19a	777	+	1		0	0	0		-	-	-		-	-	-		1	5.13e-15	-1.36554	1
CG15458	548	-	1		0	0	0		-	-	-		-	-	-		2.9244	1.54814	-0.395807	0.49851
CG15459	1268	-	1		0	0	0		-	-	-		-	0	-		0.37024	-1.43347	-1.28275	1
HERC2	17770	+	3.748		8.14153	1.08449	9.22602		1.25329	1.34596	0		1.17809	0.850177	0.660218		0.745226	-0.42425	6.73262	0.598472
Syx16	1447	-	1		0.895883	0.518669	1.41455		1.01887	0.402271	1		0.873484	0.725198	1.14682		1.20255	0.266097	6.8856	0.790215
l(1)G0004	951	+	1		0.377214	0.235759	0.612973		0.799457	0.179431	1		0.974151	0.9197	0.660919		1.11724	0.159945	8.59333	0.868699
CG15460	711	-	1		0	0	0		-	-	-		0	-	-		0.242266	-2.04533	-0.055919	0.264157
CG12679	759	-	1		0	0	0		-	-	-		-	-	-		1	5.13e-15	-1.36554	1
CG1631	1188	+	1		0	0	0		-	-	-		-	-	-		1	5.13e-15	-1.36554	1
CG1504	5399	-	1		0	0	0		-	-	-		-	-	-		4.79038	2.26014	-1.26422	1
inx6	1520	-	1		0	0	0		-	-	-		-	-	-		0.199318	-2.32686	-1.26352	0.606607
CG42577	279	+	1		0	0	0		-	-	-		-	-	-		1	5.13e-15	-1.36554	1
CG17065	2440	-	1		2.02752	0.612973	2.6405		0.988474	0.370704	1		0.868405	0.862271	0.742272		1.33102	0.412536	7.74563	0.71414
Rab10	3267	+	1		10.092	0.378337	10.4704		0.725222	0.157257	1		1.37203	0.779836	1.03359		0.707159	-0.499893	7.28297	0.568089
CG17068	3140	-	1		53.6823	0	53.6823		1.1681	0.28581	1		2.08821	1.10692	1.63838		1.59497	0.673529	5.39066	0.433107
Peritrophin-A	3551	+	1		0.0471517	0.165031	0.212183		2.39506	2.79222	0		1.38441	0.675025	1.57124		0.980352	-0.0286279	3.82897	0.981966
obst-A	3321	+	1		0.0471517	0	0.0471517		0.978911	0.891787	0		2.57305	1.03658	1.46891		0.540527	-0.887561	3.5749	0.447928
sw	8423	-	1		1.8824	0.0188607	1.90126		1.04588	0.452086	1		1.55637	0.854835	1.51898		1.17904	0.237611	4.24969	0.719657
CG33498	843	-	1		0	0.111592	0.111592		1.01961	0.152935	1		0.910021	0.918019	1.20858		1.27658	0.352279	6.99871	0.735432
CG33491	843	-	1		0	0.111592	0.111592		1.01961	0.152935	1		0.922588	0.918019	1.20858		1.27658	0.352279	6.99871	0.735399
Sdic4	4948	-	1		0.46785	0.0188607	0.486711		1.21839	0.665922	1		1.24958	0.822393	1.69892		1.27169	0.346743	3.82835	0.644101
CG33487	843	-	1		0	0.0880166	0.0880166		1.19272	0.482064	1		0.816884	0.951626	1.40709		1.25585	0.328665	6.62841	0.772952
CG33496	843	-	1		0	0.0880166	0.0880166		1.19272	0.482064	1		0.816884	0.951626	1.40709		1.25585	0.328665	6.62841	0.772951
Sdic3	4731	-	1		0.0199085	0.0188607	0.0387692		1.22242	0.699955	1		1.75994	0.828666	1.92032		1.21433	0.280156	2.58426	0.740765
CG33496	855	-	1		0	0.0880166	0.0880166		1.19272	0.482064	1		0.816884	0.951626	1.40709		1.25585	0.328665	6.62841	0.772957
CG33487	855	-	1		0	0.0880166	0.0880166		1.19272	0.482064	1		0.816884	0.951626	1.40709		1.25585	0.328665	6.62841	0.772944
Sdic2	4450	-	1		0.456062	0.0188607	0.474923		1.10587	0.542914	1		1.31138	0.835307	1.6025		1.1608	0.215125	3.63883	0.787898
Sdic4	4948	-	1		0.46785	0.0188607	0.486711		1.21839	0.665922	1		1.24958	0.822393	1.69892		1.27169	0.346744	3.82835	0.64409
CG33498	847	-	1		0	0.111592	0.111592		1.01961	0.152935	1		0.910021	0.918019	1.20858		1.27658	0.352279	6.99871	0.735418
CG33491	847	-	1		0	0.111592	0.111592		1.01961	0.152935	1		0.922588	0.918019	1.20858		1.27658	0.352279	6.99871	0.735393
Sdic1	4438	-	1		0.0199085	0.0660124	0.0859209		0.713957	0.613726	0		1.77037	0.755309	1.68439		1.15101	0.202897	2.10819	0.857547
AnnX	2075	-	1		0.809438	1.29039	2.09982		0.921552	0.0953333	1		0.904987	0.874691	0.927188		1.22151	0.288669	8.71028	0.763177
CG9578	1312	+	1		1.55601	0.612973	2.16898		0.663922	0.0922208	1		1.13596	0.771978	0.693107		0.745236	-0.424231	4.70315	0.525927
CG9581	1939	-	1		0.80158	0	0.80158		0.80205	0.185748	1		1.00335	0.710689	0.812865		1.0385	0.0545043	6.9596	0.954626
CG9577	1406	+	1		0.565821	0.188607	0.754428		0.867336	0.361183	1		1.16067	1.07804	1.41719		0.925968	-0.110966	6.45658	0.916362
CG9576	2378	-	1		2.12183	0	2.12183		0.621578	0.129744	1		0.875933	0.734242	1.83888		0.727556	-0.458869	4.34401	0.494197
Rab35	3360	-	1		14.0984	0.0471517	14.1455		0.635933	0.111136	1		1.63868	0.75998	0.940968		0.643045	-0.637009	7.32182	0.487423
CG9572	7389	+	0.667147		0.848731	0.0471517	0.895883		1.23139	0.573247	1		1.18635	1.07254	1.2071		1.45484	0.540859	6.61152	0.643464
Or19a	1370	-	1		0.377214	0	0.377214		0.777017	0.320824	1		1.20612	0.434227	0.801239		0.734164	-0.445826	5.16982	0.548839
CG34332	469	+	1		0.0235759	0.141455	0.165031		-	-	-		0.661132	0.748639	0.449283		0.873162	-0.195678	3.48473	0.904856
CG42583	318	+	1		0	0.471517	0.471517		-	-	-		-	0.962535	-		1.4972	0.58227	-1.04584	1
CG15322	4583	+	1		0	0.146694	0.146694		-	-	-		7.71916	1.92507	4.06526		0.556362	-0.845904	0.154108	0.702689
CG42582	714	-	1		0.0471517	0	0.0471517		-	-	-		1.92979	-	-		1	5.13e-15	-1.36554	1
CG34331	605	+	1		0	0	0		-	-	-		5.78937	0.962535	0.83871		1.4169	0.502736	0.0191553	0.817462
CG15323	468	-	1		0	0.0471517	0.0471517		1.02205	0.635414	1		0.974324	0.733562	1.3733		1.30225	0.381004	6.97423	0.774123
CG42581	313	-	1		0.0235759	0.141455	0.165031		-	-	-		1.44734	0.320845	0		0.865803	-0.207889	0.443137	0.946526
Or19b	1370	+	1		0.330062	0	0.330062		0.820117	0.327605	1		1.01515	0.39115	1.29863		0.75152	-0.412116	5.53355	0.593055
fd19B	783	-	1		0.0471517	0.0471517	0.0943035		-	-	-		1.12571	0.481268	-		0.550717	-0.860618	0.50642	0.509393
CG9570	1228	+	1		0	0	0		-	-	-		-	-	1.62937		1.06702	0.0935852	0.250363	1
D2R	23512	-	1		0.236152	0.28291	0.519062		1.57117	1.49413	0		0	0	4.76613		0.980957	-0.0277386	0.431966	1
CG17003	1130	-	1		0.0471517	0	0.0471517		-	-	-		-	-	-		1	5.13e-15	-1.36554	1
rst	21626	-	1		12.0767	0.0471517	12.1239		0.604766	0.182964	1		2.68026	0.471446	0.595802		0.646167	-0.630021	4.23541	0.428592
CG3603	914	+	1		0.0943035	0.141455	0.235759		0.904536	0.300474	1		1.31659	0.742826	1.39826		1.09972	0.137141	5.91835	0.867623
CG17959	447	+	1		0	0.141455	0.141455		-	-	-		-	-	-		1	5.13e-15	-1.36554	1
CG14423	1187	+	1		0	0.377214	0.377214		-	-	-		-	0	-		0.860436	-0.21686	-1.11675	1
CG14422	1169	+	1		0	0.0943035	0.0943035		-	-	-		-	-	-		0.654594	-0.611329	-0.0905648	0.776173
CG14421	789	+	1		0	0.141455	0.141455		-	-	-		-	-	-		0.389223	-1.36133	0.28025	0.489029
CG14420	1045	+	1		0	0.188607	0.188607		-	-	-		-	-	-		3.42567	1.77639	-0.986229	0.650776
CG3598	946	+	1		0	0.235759	0.235759		-	-	-		-	-	-		1	5.13e-15	-1.36554	1
CG3592	750	+	1		0	0.471517	0.471517		-	-	-		-	-	-		1	5.13e-15	-1.36554	1
CG32793	2747	+	1		0	0.188607	0.188607		-	-	-		-	-	-		0.0850994	-3.55471	-1.09343	0.423691
CG14424	1121	-	1		0.235759	0.0471517	0.28291		-	-	-		-	-	-		0.126586	-2.98181	-1.16951	0.561847
CG3588	4614	+	1		0.00785862	0	0.00785862		-	-	-		-	-	-		0.349791	-1.51543	-0.63317	0.556663
CG3526	3465	+	1		0.0471517	0	0.0471517		-	-	-		-	0.64169	-		0.926721	-0.109794	0.365693	0.963159
CG14419	728	-	1		0	0	0		-	-	-		-	0.962535	-		1.5292	0.612778	0.393842	0.756193
CG14418	1068	-	1		0	0	0		-	-	-		-	-	-		4.40194	2.13814	-0.150238	0.329551
CG14417	993	-	1		0	0	0		-	-	-		-	-	-		0.46997	-1.08936	-0.821357	0.637683
CG14416	832	-	1		0	0	0		0.299065	0.243796	0		1.92979	0.64169	-		0.554995	-0.849453	1.65101	0.521123
CG12498	966	+	1		0	0	0		-	-	-		-	-	-		1	5.13e-15	-1.36554	1
w	5868	-	1		0.0943035	0.188607	0.28291		1.01546	0.160565	1		1.10274	0.884068	1.22441		1.31568	0.395812	7.01627	0.638468
CG32795	7662	-	1		1.03734	0.518669	1.55601		0.565976	0.358766	1		1.26179	0.912749	2.24892		0.63821	-0.647896	2.80356	0.39652
CR43494	498	-	1		0	0	0		-	-	-		-	-	-		1	5.13e-15	-1.36554	1
kirre	392408	+	1		19.6644	29.1088	48.7732		1.15883	0.0942513	1		3.13591	1.06135	1.43206		1.30169	0.380385	4.39832	0.610057
Syx4	4980	-	1		0.141455	0.0471517	0.188607		-	-	-		4.27311	3.03569	-		4.08076	2.02884	2.70354	0.0318466
crm	4534	-	1		4.71517	0.612973	5.32815		1.43884	0.266114	1		2.17101	0.691943	1.05322		1.42724	0.513233	4.13946	0.578868
CG2712	2032	+	1		0.754428	2.31044	3.06486		1.96877	1.83251	0		0.81748	0.809088	0.937712		1.31176	0.391503	2.69694	0.669572
ttm50	1967	-	1		1.74461	0	1.74461		0.810465	0.132314	1		0.854062	0.78665	0.849529		0.976182	-0.0347785	6.99982	0.967089
dwg	2358	+	1		0.943035	0	0.943035		1.04179	0.588848	1		0.886004	0.875032	0.855426		0.99769	-0.0033358	3.56006	1
CG2709	783	+	1		0.848731	0.0471517	0.895883		1.07149	0.314277	1		1.05535	1.41372	1.62491		1.06552	0.0915518	3.8266	0.92551
fs(1)Ya	2296	+	1		60.9358	0.848731	61.7845		1.23866	0.906992	1		0.851378	0.962535	0.817706		1.03303	0.0468882	2.15318	0.983142
fs(1)Yb	3692	+	1		20.2281	0.471517	20.6996		0.991205	0.400946	1		1.13686	0.799483	1.06027		1.02042	0.0291585	4.78754	0.967658
CG2701	2686	-	1		1.93322	0.188607	2.12183		1.031	0.602778	1		0.787074	0.831578	0.943011		1.00764	0.0109865	4.32477	0.99381
CG2694	3575	+	1		3.34777	0.141455	3.48923		0.90403	0.122108	1		1.19342	0.648665	1.00808		1.0539	0.0757379	3.99149	0.913949
CG2685	2209	-	1		0.660124	0.0471517	0.707276		1.13554	0.723895	1		1.17088	0.921577	0.797909		1.22814	0.296475	3.67238	0.728205
CG2681	2985	+	1		0	0.198037	0.198037		-	-	-		1.28653	0.27501	1.87204		1.56846	0.649352	-0.436127	0.699061
CG2680	1267	-	1		0.0471517	0.612973	0.660124		-	-	-		-	-	-		0.183224	-2.44832	-1.18845	1
eIF2B-beta	1642	+	1		1.74461	0	1.74461		1.00457	0.291304	1		1.09544	0.889786	1.0604		0.918246	-0.123048	5.26518	0.878664
Csat	2653	-	1		21.5955	0.188607	21.7841		0.717617	0.235365	1		0.97351	0.957723	1.00088		0.710919	-0.492242	7.2896	0.592463
CG2662	2215	+	1		0.754428	0.0471517	0.80158		0.931135	0.404866	1		0.951494	0.866965	0.907712		0.996633	-0.00486543	3.15791	1
CG2658	3494	-	1		1.69746	0	1.69746		0.818116	0.122331	1		0.964895	0.718912	1.2192		0.890365	-0.16753	5.58036	0.816328
CG2650	1156	-	1		0.612973	0	0.612973		1.02189	1.06597	0		0.482447	1.28338	1.49126		1.46701	0.552879	1.19576	0.661406
per	7201	+	1		0.424366	0.0471517	0.471517		1.01072	0.5908	1		2.10523	1.4438	0.843481		1.07961	0.110506	1.93591	0.921646
CG2652	946	-	1		0	0.0471517	0.0471517		-	-	-		-	-	-		10.224	3.35389	-1.16759	0.432424
HLH3B	1525	-	1		0	1.17879	1.17879		-	-	-		-	-	-		0.0553048	-4.17645	-0.926467	0.179878
sgg	43897	+	1.23615		73.121	0.129667	73.2507		0.983502	0.233049	1		2.62451	0.95793	1.47207		1.05518	0.0774916	6.28729	0.921099
PI4KIIIalpha	8550	+	1		3.77214	0.0471517	3.81929		1.23536	0.730028	1		1.07143	0.855883	0.984428		1.20138	0.264688	3.78109	0.715359
brv3	2507	-	1		0.0471517	2.07468	2.12183		-	-	-		0	0.320845	-		0.492612	-1.02148	-0.420006	0.715167
Seipin	2341	+	1		2.59335	0	2.59335		0.975642	0.347897	1		1.10784	0.905916	1.81214		1.04343	0.0613295	1.97259	0.96692
Tsp3A	1981	-	1		3.89002	0	3.89002		0.718119	0.351396	1		1.70126	0.912316	0.890622		0.737726	-0.438844	4.81166	0.554355
CG8636	1118	-	1		1.88607	0.0471517	1.93322		0.898976	0.160195	1		1.31275	0.864638	1.07949		1.05162	0.0726086	7.92355	0.922987
Bzd	1989	-	1		1.3674	2.6405	4.0079		0.836954	0.361264	1		1.38112	1.02365	0.94664		0.887344	-0.172435	3.23098	0.829531
mit(1)15	2637	+	1		3.96075	1.13164	5.09239		0.802335	0.369287	1		1.1061	0.851007	0.893814		0.89092	-0.166633	4.46955	0.807056
Klp3A	4896	-	1		8.2044	0.0943035	8.29871		1.87832	2.10982	0		2.05502	0.90679	1.04256		1.49008	0.575394	4.38298	0.419075
egh	10105	+	1		8.16154	0.358353	8.51989		1.25764	1.09	0		2.08115	0.719277	0.887634		1.00447	0.00643273	5.06699	1
wds	2241	+	1		4.0079	0.0471517	4.05505		2.35966	2.73285	0		1.81212	0.741172	0.898477		1.32556	0.406604	4.78209	0.626232
CG13760	1955	-	1		0.471517	0	0.471517		0.768326	0.661244	0		1.27284	0.630627	0.80968		0.607689	-0.718596	2.09544	0.430787
CG13759	2792	+	1		0.141455	0.188607	0.330062		-	-	-		-	-	-		0.18323	-2.44827	-1.18845	1
Vha36-3	1054	-	1		0.117879	0	0.117879		-	-	-		1.44734	0.82503	0		0.925155	-0.112233	1.59986	0.96116
Pdfr	22909	+	1		5.48139	3.8943	9.37569		-	-	-		-	-	-		1.01145	0.0164186	-1.16758	1
trol	74303	-	3.35972		96.5355	3.89078	100.426		0.889461	0.790965	0		1.45806	0.699448	1.06		0.672042	-0.573377	6.92627	0.502996
z	2782	+	1		2.03931	0.141455	2.18077		0.80212	0.257455	1		1.14083	0.810556	1.07591		0.858828	-0.219559	4.84608	0.738605
boi	25837	-	1.35151		5.8064	2.29079	8.09719		1.12301	0.527473	1		1.50765	0.977279	1.22633		1.29254	0.370207	5.10042	0.595005
tko	1664	-	1		2.31044	0	2.31044		0.910062	0.256196	1		0.954482	0.866282	1.2894		1.28087	0.357125	8.69751	0.738858
gt	1857	-	1		1.55601	0.0471517	1.60316		1.43219	1.95635	0		2.65346	1.18466	0.640783		0.632449	-0.660979	1.4327	0.524541
CG32797	609	-	1		1.83892	0	1.83892		-	-	-		-	0.481268	-		0.821079	-0.284408	-1.09678	1
CG12496	1543	-	1		0	0.235759	0.235759		-	-	-		-	-	-		0.205767	-2.28092	-1.26383	1
PsGEF	9547	-	1		0.110021	0.40079	0.51081		-	-	-		1.92979	-	0.83871		1.80672	0.85337	-0.981914	1
CG14047	8652	-	1		0	0.379988	0.379988		-	-	-		-	-	-		0.71394	-0.486125	-0.120388	0.74949
ptr	21344	-	1		2.78869	3.11201	5.9007		1.53051	1.44815	0		2.89468	0.657238	0.958873		1.46204	0.547979	2.84899	0.525311
mRpL14	641	-	1		0.660124	0.518669	1.17879		0.916463	0.191068	1		1.30021	0.97049	2.96909		1.17365	0.231003	6.99455	0.788513
phl	3746	+	1		2.7348	0.235759	2.97056		1.26858	1.32475	0		1.84896	0.668427	0.945412		1.585	0.664486	4.4192	0.431666
Ilp6	3166	-	1		8.67592	1.74461	10.4205		0.759321	0.090917	1		2.54167	0.68447	1.21615		0.825574	-0.27653	5.60875	0.709891
CR33218	668	+	1		0	0	0		-	-	-		-	-	-		1	5.13e-15	-1.36554	1
CG2854	1814	+	1		0.188607	2.21613	2.40474		-	-	-		-	0.962535	0.487072		0.794932	-0.331096	-0.345535	1
CG14050	1470	-	1		6.60124	0.377214	6.97846		2.3925	2.96101	0		0.933769	1.07889	1.28224		1.1695	0.225891	2.77191	0.807694
CR34052	507	-	1		0	0	0		-	-	-		-	-	-		1	5.13e-15	-1.36554	1
CG2865	11235	-	1		1.23773	0.987829	2.22556		1.41316	0.495564	1		3.15199	0.622817	1.32995		1.7989	0.847112	2.13876	0.373387
Vml	1738	+	1		3.35956	0.0707276	3.43029		0.176725	0.0767129	1		8.20161	0.730199	1.35538		0.260323	-1.94162	2.59986	0.151297
CG2918	3794	-	1		7.59143	0.0471517	7.63858		1.19582	1.10999	0		3.71923	0.819115	0.88605		1.50523	0.589985	5.82016	0.480655
CG2924	5766	-	1		6.32619	0.990186	7.31638		1.01487	0.407672	1		2.04905	0.712919	0.844973		1.20112	0.264375	5.79992	0.74135
CG3071	1986	+	1		19.7802	37.9807	57.7609		0.882365	0.438866	1		0.99074	0.879353	1.0431		0.876553	-0.190087	4.08017	0.802373
l(1)G0144	2325	-	1		2.02752	0	2.02752		1.13663	0.0610388	1		1.59061	1.0316	1.45165		1.27315	0.348405	4.19154	0.603506
CG3078	5465	-	1		0.212183	0.00392931	0.216112		1.30943	1.41606	0		1.35085	0.588216	0.604785		1.27591	0.351528	2.92257	0.759935
CG3091	1803	-	1		1.22595	0	1.22595		0.761488	0.237397	1		1.38054	0.762898	0.874022		0.781149	-0.35633	4.56194	0.662103
CG3191	1849	-	1		0.471517	0	0.471517		0.797983	0.159918	1		0.289468	0.481268	0.652535		0.902091	-0.148655	2.53277	0.896812
crn	2389	-	1		0.518669	0.0943035	0.612973		1.03474	0.324418	1		0.847594	0.765158	1.08204		0.97683	-0.0338208	5.35068	0.972633
Or2a	1339	+	1		0.0943035	0	0.0943035		0.837131	0.377933	1		3.85958	0.481268	0.852151		0.825491	-0.276676	1.3205	0.825215
fs(1)K10	3940	+	1		13.1553	0.0943035	13.2496		1.2202	0.252866	1		3.2631	0.786882	1.27909		1.38753	0.472523	4.66571	0.547744
kz	4116	-	1		1.19451	1.81534	3.00985		1.63876	0.781476	1		1.36782	0.774067	0.92372		1.83098	0.872613	3.03082	0.243803
pcx	12346	+	1.02682		21.1947	1.10021	22.2949		0.907683	0.73464	0		2.00124	0.711136	1.05572		0.980894	-0.0278302	6.06211	0.971372
CG14052	815	+	1		0.0471517	0	0.0471517		0.554563	0.235932	1		1.11725	1.07254	3.29113		0.513355	-0.961972	2.76422	0.396034
Vinc	8174	-	1		15.0414	0.28291	15.3243		0.743989	0.299496	1		1.42455	0.868468	1.13755		0.791663	-0.337041	6.57256	0.640968
msta	7926	-	1		0.489199	0.108973	0.598172		-	-	-		0	-	0.68622		0.761783	-0.392548	-0.118166	0.855613
CG18031	2009	-	1		0	0	0		-	-	-		-	1.92507	0.419355		5.64818	2.49779	-0.691418	0.247091
CR43637	1178	-	1		0	0	0		-	-	-		-	-	-		1	5.13e-15	-1.36554	1
Mct1	10791	+	1		0.565821	0.0943035	0.660124		-	-	-		1.17932	1.73256	2.15161		0.586474	-0.76986	1.03539	0.58459
CG14053	1115	-	1		0.0471517	0	0.0471517		-	-	-		-	-	-		0.0624509	-4.00113	-1.00571	0.1889
CG3457	894	+	1		0.565821	0	0.565821		1.20622	0.41843	1		1.03594	0.915746	2.49806		1.26832	0.342918	8.77516	0.754106
CG17777	768	+	1		0.188607	0.28291	0.471517		1.12913	0.403199	1		1.20612	2.88761	0		1.03255	0.0462174	1.78934	0.980711
CG17776	319	+	1		0.471517	0	0.471517		1.2918	0.733211	1		0.910725	0.952813	1.56204		1.31034	0.389947	7.79088	0.70826
Nmd3	1838	-	1		1.98037	0.943035	2.92341		0.869012	0.185306	1		1.30089	0.771418	1.08472		0.783663	-0.351695	5.89485	0.687627
pn	1823	+	1		1.22595	1.2731	2.49904		0.972707	0.232179	1		1.11805	1.21532	0.958792		1.06228	0.0871643	4.04969	0.891727
Cyp4ae1	2115	+	1		0.377214	0.895883	1.2731		-	-	-		-	1.60423	1.07079		0.83385	-0.26214	-0.244998	1
Cyp4d2	1838	+	1		8.53446	5.4696	14.0041		1.02223	0.455571	1		0.679	0.762528	1.60547		1.09861	0.135685	2.84163	0.890218
Cyp4d14	1899	-	1		3.58353	0.518669	4.1022		1.0299	0.716315	1		1.50765	0.82503	1.05418		1.20223	0.265715	1.68318	0.824421
CG3621	610	+	1		0.330062	0.0471517	0.377214		1.07075	0.331009	1		0.880001	0.991268	1.10824		1.40774	0.493378	8.88217	0.635183
CG3630	5467	+	1		1.08449	0	1.08449		1.45794	1.61319	0		1.30645	0.756278	1.10336		0.9129	-0.131471	3.68223	0.880674
Cyp4d1	2985	-	1		0.0471517	0.188607	0.235759		-	-	-		0	-	-		1.33741	0.419437	-0.277842	0.822016
wapl	8882	-	1		7.66057	0.00472361	7.6653		1.00186	0.578888	1		1.13485	0.755718	0.895671		1.08086	0.11218	5.42894	0.882578
bcn92	1154	-	1		4.11399	3.83697	7.95096		0.883815	0.117895	1		1.93515	0.779419	0.951949		1.03788	0.0536411	4.80174	0.944759
Pgd	3431	+	1		5.15722	3.87823	9.03545		0.810514	0.160576	1		1.15495	0.906608	1.18242		1.14194	0.191484	7.96442	0.828579
CG3835	3452	+	1		0.0565821	0.28291	0.339492		0.449371	0.310269	1		1.28653	0.206258	-		0.484523	-1.04536	1.82466	0.233138
ph-p	10646	-	1		5.05868	0.172864	5.23155		1.28704	0.973306	1		2.79312	0.660201	1.02241		1.18775	0.248235	3.11419	0.798219
ph-d	6266	-	1		1.01376	0	1.01376		2.08179	1.1769	1		2.113	0.702772	1.12532		1.8605	0.895689	2.97508	0.324373
csw	19430	+	1		19.8576	1.32025	21.1779		0.834885	0.325395	1		2.619	0.715241	1.00381		0.826379	-0.275125	5.73715	0.724284
Unc-76	12485	+	1		5.23384	0.00196466	5.23581		0.912711	0.360427	1		2.41966	0.909061	1.32477		1.06332	0.0885795	5.06515	0.904437
CG16903	2043	-	0.667147		4.43226	4.40869	8.84095		0.840793	0.206306	1		0.87491	0.833357	0.964424		0.898083	-0.155079	5.64288	0.841016
CG4025	1474	+	1		5.11596	3.81929	8.93525		0.641605	0.140216	1		1.44192	0.888752	2.29464		0.726055	-0.461849	6.01618	0.497974
CG4045	1106	-	1		0.895883	1.60316	2.49904		0.863047	0.0330065	1		0.7564	0.906736	1.47449		1.10164	0.139651	6.88659	0.881116
CG4061	2478	+	1		4.43226	0.330062	4.76233		1.16608	0.24249	1		1.08916	0.83082	1.40631		1.46076	0.546721	5.35472	0.488529
CG4194	1095	+	1		0.707276	0.0471517	0.754428		-	-	-		-	0.962535	0.759745		0.625481	-0.676963	-0.100891	0.594513
CG4199	7044	-	1		3.06486	3.30062	6.36548		0.712695	0.0833272	1		1.02483	0.907231	1.15381		0.826565	-0.2748	6.0435	0.691136
CG14054	1087	-	1		0.188607	0.518669	0.707276		-	-	-		0	1.20317	1.87806		0.787294	-0.345026	-0.353226	0.920132
CG4281	2824	-	1		7.40282	0.0471517	7.44997		1.04771	0.554632	1		1.29929	0.811228	0.885111		1.13542	0.183221	4.06826	0.811092
SIK2	6597	-	1		0.188607	1.41455	1.60316		0.500514	0.236407	1		0.723671	0.502192	0.862212		0.578335	-0.790023	1.37714	0.40029
CG4313	2798	+	1		2.31044	0.0471517	2.35759		0.393409	0.294174	1		1.26179	0.753289	1.44214		0.544699	-0.876468	2.17588	0.381615
moody	5296	-	1		14.7113	2.54619	17.2575		0.452137	0.318965	1		2.87479	0.74469	1.09563		0.421101	-1.24776	5.57288	0.135807
CG4325	775	-	1		0.28291	1.08449	1.3674		0.649503	0.534938	0		1.21125	0.651127	1.60251		0.527612	-0.922451	4.0526	0.220352
usp	2513	-	1		7.54428	0	7.54428		1.01026	0.298442	1		1.72762	0.786221	0.971262		1.03916	0.0554245	5.63938	0.939866
Actn	17196	-	1		14.0669	0.754428	14.8214		1.36926	1.57858	0		1.49441	0.751188	1.03081		0.905742	-0.142828	4.93491	0.853247
east	13216	+	0.591141		20.6269	1.37414	22.001		1.52215	1.70304	0		2.99944	0.722338	0.971969		1.0594	0.0832472	6.06791	0.923601
CG4406	1433	-	1		6.22403	0	6.22403		0.652341	0.176482	1		1.10274	1.09656	1.02211		0.767608	-0.381559	6.36898	0.653018
Nep3	7383	+	1		1.32731	0.0557962	1.3831		-	-	-		2.12277	0.563435	1.20333		0.481643	-1.05397	3.18162	0.337606
CG12655	996	-	1		0.0471517	0.159324	0.206476		0.57641	0.32413	1		1.54377	0.723168	1.33318		0.920907	-0.118872	6.84435	0.909107
amn	3953	-	1		0.0471517	7.59143	7.63858		-	-	-		2.89468	-	-		2.18153	1.12534	-0.726278	0.687888
CG32529	40542	+	1.11717		69.8561	0.535525	70.3917		1.12061	0.971974	0		1.77801	0.762217	1.02828		0.692771	-0.529549	6.19029	0.571308
CG15618	5782	-	1		4.29081	0.377214	4.66802		0.869225	0.309198	1		0.939941	0.725529	0.991406		0.918034	-0.12338	3.74189	0.880897
CG11943	7164	+	1		4.14935	0	4.14935		1.38576	1.23559	0		1.32038	0.725389	1.15121		1.14902	0.200398	3.99191	0.79605
pico	20445	-	1		232.034	0.589397	232.623		0.768187	0.19527	1		1.54582	0.803712	1.15065		0.904954	-0.144084	6.41829	0.841934
skpE	504	-	1		0	0.0471517	0.0471517		1.40783	0.642556	1		1.16803	2.1657	0		1.96843	0.977049	3.38044	0.345164
skpC	477	+	1		0.330062	0	0.330062		1.10865	0.184224	1		1.07818	0.987927	1.22865		1.25473	0.327376	7.9898	0.764643
skpD	660	+	1		0.518669	0	0.518669		1.40315	0.846607	1		0.964895	0.962535	0.541632		1.40246	0.487958	4.77296	0.680635
vfl	16705	-	4.39379		29.1885	0.284875	29.4734		0.684316	0.131773	1		1.02808	0.407002	0.697099		0.760074	-0.395789	7.49254	0.651061
CG12702	3156	-	1		4.29081	8.32228	12.6131		1.35516	0.555782	1		1.16346	0.764432	0.811614		1.54562	0.628189	5.00268	0.419002
CG12703	8491	+	1		15.4081	3.35563	18.7638		0.77755	0.269983	1		1.9234	0.717244	1.39227		0.714018	-0.485967	5.47156	0.518407
Alr	1253	+	1		1.88607	0	1.88607		1.10722	0.222386	1		1.3605	0.896564	1.19059		1.32709	0.40827	6.72951	0.611686
CG32528	2402	+	1		17.7291	0	17.7291		0.912129	0.158315	1		1.31085	0.864423	1.18015		1.01037	0.0148865	6.50759	0.983594
Rpp20	1315	+	1		0.9116	0.0471517	0.958752		0.818177	0.290236	1		1.5974	0.905974	1.07756		0.889255	-0.169331	6.64282	0.834859
CG33932	1315	+	1		0.9116	0.0471517	0.958752		0.818177	0.290236	1		1.5974	0.905974	1.07756		0.889255	-0.169331	6.64282	0.834852
CG18809	2559	-	1		0.565821	0.0471517	0.612973		1.28656	0.545474	1		1.79712	0.730199	0.990339		1.27954	0.355627	3.98951	0.616262
CG14235	3797	-	1		11.5993	0.0471517	11.6465		0.945585	0.105058	1		1.3864	0.859286	1.42462		1.18154	0.240665	9.19251	0.798604
CG14234	4883	+	1		0.190353	0.141455	0.331809		-	-	-		1.92979	0.481268	-		0.475031	-1.07391	-0.819945	0.771997
Bap	3585	+	1		5.18669	0.0471517	5.23384		1.67509	1.33512	1		1.40129	0.933613	1.28599		1.27329	0.348561	4.94986	0.622908
CG12531	7200	+	1		0	0.00523908	0.00523908		-	-	-		0.964895	-	-		1.50375	0.588561	-1.13534	1
meso18E	6644	-	1		24.9925	4.29081	29.2833		0.854759	0.176235	1		0.993759	0.702677	0.915909		1.04129	0.0583687	5.26374	0.936429
CG14230	2258	+	1		0.707276	0.990186	1.69746		2.195	2.52687	0		1.14633	0.810751	0.785413		1.36377	0.447597	2.84038	0.653307
CG14232	2272	-	1		1.03734	0.141455	1.17879		1.00315	0.25696	1		1.17726	0.904003	0.952907		1.10011	0.137651	4.29358	0.840968
CG14231	1935	-	1		12.0237	5.42245	17.4461		0.889355	0.262081	1		1.02056	0.787529	0.963978		1.2434	0.314289	7.48531	0.747476
Cdc42	2855	+	1.35844		16.9067	5.36048	22.2671		0.974161	0.25913	1		3.23471	0.915605	1.4082		1.00833	0.0119735	8.16625	0.988932
CG14229	844	-	1		0.707276	0	0.707276		0.528333	0.12753	1		1.40446	0.856493	0.677396		0.548276	-0.867025	5.1889	0.229742
Mer	2905	-	1		2.16898	0	2.16898		1.52698	0.670908	1		1.87016	0.83569	1.07929		1.47308	0.558832	3.76179	0.460826
CG14227	1135	-	1		0.0471517	0.471517	0.518669		-	-	-		-	0	-		0.230807	-2.11524	-0.743513	0.486787
Ubqn	3493	+	1		35.2037	0.0943035	35.298		1.21196	0.179399	1		1.8008	0.87028	1.09998		1.33568	0.41757	7.19089	0.570378
dome	7460	-	1		4.1965	0.0471517	4.24366		0.925885	0.528536	1		1.2263	0.725331	1.04674		0.969154	-0.0452023	5.76836	0.947094
et	3580	-	1		0.188607	0.0707276	0.259335		1.79954	1.5	0		1.28653	1.28338	2.13038		1.55021	0.632468	0.446551	0.657935
Zw	5120	+	1		0.943035	0.377214	1.32025		0.961965	0.487558	1		1.34322	0.63982	1.07342		0.981867	-0.0263998	4.10592	0.976995
CG14216	2308	+	1		2.95331	0.0235905	2.9769		0.757674	0.0959848	1		1.11503	0.790882	1.2899		0.881883	-0.181341	5.54247	0.782998
CG14223	1811	-	1		0.0471517	0	0.0471517		0.919511	0.540784	1		0.482447	0.589941	0.84543		1.11962	0.163009	2.25192	0.89437
CG14215	7105	+	1		7.21422	0	7.21422		1.35565	1.10069	0		1.22777	0.766976	0.886861		1.22496	0.292738	4.99263	0.657015
Ranbp21	5342	-	1		10.7034	0.0943035	10.7977		1.64398	1.25155	1		1.75274	0.783704	1.00562		1.1069	0.146524	4.77773	0.86391
Arp11	1518	-	1		0.424366	0.0471517	0.471517		0.72813	0.312127	1		0.793971	0.838337	1.48639		0.767385	-0.381977	5.82746	0.716158
Sec61gamma	1164	+	1		2.16898	0	2.16898		0.829837	0.128888	1		1.22739	0.809211	0.876114		1.08028	0.111401	8.01713	0.905088
CG12237	1677	-	1		1.17879	0.0471517	1.22595		1.05008	0.445488	1		0.854022	1.06171	1.08717		1.16952	0.225921	7.69619	0.83795
Rcd-1	1872	+	1		2.68765	0	2.68765		1.04326	0.399647	1		1.53702	0.7121	1.31935		1.13733	0.185652	6.00059	0.789825
e(y)3	10399	-	1.11717		5.58486	0.141455	5.72632		1.15691	0.792707	1		1.46832	0.747404	1.02401		1.12934	0.175483	5.54408	0.81432
CG14212	872	+	1		2.09825	3.30062	5.39887		-	-	-		5.78937	1.92507	-		0.332837	-1.58711	-0.951425	0.391212
MKP-4	2616	+	1		27.791	2.16898	29.96		0.765136	0.23073	1		1.02267	0.900282	0.995929		0.803664	-0.315336	4.41986	0.656957
CG14222	1627	-	1		2.92341	0	2.92341		1.11671	0.360577	1		2.15953	0.682916	0.964725		1.23933	0.309563	4.91252	0.70332
CG14221	2302	-	1		3.53638	0.0943035	3.63068		2.84987	4.11569	0		0.681102	0.333185	1.45269		1.34032	0.422573	1.4699	0.719211
Tim9b	1867	-	1		2.54619	0.0943035	2.6405		0.696309	0.240594	1		0.760647	0.876659	1.1936		0.771929	-0.37346	4.94961	0.572441
CG12788	1867	-	1		2.54619	0.0943035	2.6405		0.696309	0.240594	1		0.760647	0.876659	1.1936		0.771929	-0.37346	4.94961	0.572434
CG14210	619	+	1		0.28291	0.0471517	0.330062		0.924152	0.421691	1		0.809736	0.824016	0.71138		0.940452	-0.0885736	7.30814	0.930071
Tyler	4089	+	1		1.2731	0	1.2731		0.994812	0.274707	1		0.928385	0.826247	0.84616		1.20601	0.270239	6.68372	0.781616
Shawn	4089	+	1		1.2731	0	1.2731		0.982341	0.255992	1		0.959869	0.82268	0.818078		1.20604	0.270279	6.77675	0.782803
CG14207	6116	+	1		4.62087	0.0471517	4.66802		0.870337	0.142323	1		1.37507	0.946676	1.14762		1.0085	0.0122118	6.22988	0.986682
CG14220	2048	-	1		1.2731	1.17879	2.45189		1.10161	1.01358	0		1.2272	0.815262	1.42192		0.790247	-0.339625	4.03993	0.684086
RpS10b	1045	+	2.32224		10.9392	0	10.9392		0.915744	0.239035	1		0.842363	0.973953	1.13314		1.21067	0.275803	13.4	0.800643
CG14205	2937	+	1		0	0	0		-	-	-		0.321632	0.137505	1.1172		0.965761	-0.0502625	0.509877	1
CG14219	2690	-	1		0	0	0		-	-	-		-	0	-		1	5.13e-15	-1.36554	1
CG14204	2949	+	1		0.330062	0.471517	0.80158		-	-	-		1.73681	1.12296	-		1.02861	0.0406902	1.03641	1
CG14218	1340	-	1		0	0	0		0.420761	0.297642	1		2.14421	1.35887	-		0.642609	-0.637987	2.26831	0.632059
Tao-1	9424	-	1.75765		26.9708	0.117879	27.0887		0.999156	1.01565	0		1.13311	0.636912	0.869604		0.809392	-0.305089	6.74456	0.673564
car	3383	+	1		2.35759	0	2.35759		1.40395	0.767069	1		1.51167	1.24289	1.38526		1.33632	0.418268	2.9305	0.643956
Grip84	4257	-	1		1.88607	0	1.88607		1.7769	1.59889	0		2.41658	0.894001	1.03948		1.98913	0.992139	4.0069	0.186551
CG32532	15471	-	1		0.117879	0.00362706	0.121506		-	-	-		1.92979	1.20317	2.36631		1.11202	0.153186	0.840555	0.940616
CG12231	711	-	1		0	0	0		-	-	-		-	-	-		15.8502	3.98643	-1.0743	0.191082
CoRest	8968	+	1		19.9452	0.0471517	19.9923		1.00822	0.454457	1		2.25738	0.761269	1.02751		1.13162	0.17839	5.53219	0.787634
l(1)G0156	3383	-	1		13.1082	0.710903	13.8191		1.23447	0.597223	1		3.33621	0.857085	1.30871		1.21124	0.276479	6.10333	0.703501
CG14200	22784	+	1		88.8905	0.150886	89.0413		0.98224	0.794881	0		2.0689	0.789752	0.896643		1.03682	0.0521592	5.2538	0.950422
Pfrx	13853	+	1		71.0907	0.103734	71.1944		0.778495	0.318592	1		1.73251	0.836017	1.24473		0.845939	-0.241374	4.77295	0.747416
ksh	559	-	1		0.330062	0.0943035	0.424366		0.998332	0.476495	1		1.82881	0.956772	1.8139		0.993527	-0.00936879	7.56166	0.992236
CG12204	1110	-	1		0.330062	1.17879	1.50886		0.864984	0.282912	1		1.09209	0.722934	0.854443		0.96097	-0.0574364	3.52166	0.954806
CG12203	917	+	1		1.60316	0.0471517	1.65031		0.962377	0.229538	1		1.01202	0.752471	0.749642		1.27394	0.349299	8.89649	0.770307
pcm	6072	-	1		2.7348	1.65031	4.38511		1.38631	1.01121	1		1.38155	0.691336	1.08432		1.29643	0.374541	3.6244	0.620022
CG43260	566	-	1		0	0.377214	0.377214		-	-	-		-	-	-		0.772298	-0.37277	-1.09427	1
Nat1	4491	+	1		3.58353	0	3.58353		0.872009	0.244595	1		1.0033	0.737478	0.990469		0.984715	-0.0222214	5.08359	0.975573
mRpS14	536	-	1		0.0471517	0	0.0471517		1.29672	0.744348	1		0.776687	0.943569	1.56204		1.29019	0.367579	8.3259	0.722868
CG12200	929	+	1		0.0943035	0	0.0943035		1.12338	0.272439	1		2.51179	1.43206	1.38447		1.34937	0.432285	3.55559	0.636712
CG32533	5161	-	1		0.474661	0.188607	0.663268		1.30426	0.945738	1		0.846745	0.50463	0.996747		1.28347	0.360049	2.69856	0.708664
kek5	118730	+	1		49.0332	3.13567	52.1688		0.741493	0.310016	1		1.47266	0.727228	0.982557		0.811271	-0.301745	5.97455	0.670966
gfA	19884	-	1		0.080158	1.95311	2.03327		0.629355	0.851157	0		-	-	-		1.14929	0.200749	0.648399	0.920912
out	11037	-	1		0.707276	0.424366	1.13164		0.502421	0.0642782	1		1.62509	0.820522	1.2547		0.509882	-0.971764	3.66701	0.212213
CG8051	6604	-	1		0	0.235759	0.235759		-	-	-		0.578937	0.577521	1.0009		1.37706	0.461592	1.81934	0.728839
CG8034	15201	-	1		1.79491	0.0943035	1.88921		0.839171	0.492725	1		1.45316	0.564384	0.593174		1.04984	0.070173	5.64902	0.939421
CG8028	3091	-	1		0.141455	0.141455	0.28291		-	-	-		-	-	-		0.160048	-2.64342	-0.717216	0.0525536
CG32536	1869	-	1		0.188607	0.518669	0.707276		1.04348	0.339361	1		0.556041	0.818873	0.848656		1.39968	0.485093	3.98447	0.587433
CG32537	3193	-	1		3.96075	1.60316	5.5639		0.864601	0.237047	1		0.745298	0.844674	0.861258		1.14533	0.195764	4.97451	0.781238
CG8010	2238	-	1		2.31044	0.990186	3.30062		2.90002	2.64216	0		0.904697	0.843634	1.21949		1.48705	0.572454	3.11082	0.552231
vav	11450	+	1		9.52465	3.70141	13.2261		0.966494	0.234705	1		1.627	0.783352	1.05823		1.12003	0.163536	4.60801	0.810838
rictor	9116	-	1		4.76233	0.141455	4.90378		1.40507	0.734404	1		2.19686	0.794593	1.06267		1.54094	0.623808	3.89141	0.378819
Hs3st-B	2972	+	1		0	0	0		-	-	-		-	-	0.419355		0.60198	-0.732213	-1.02497	1
CG7992	2069	-	1		0	0.471517	0.471517		-	-	-		-	-	-		2.09652	1.068	-0.82224	0.637543
CG7889	1590	+	1		0.848731	0	0.848731		0.72496	0.112423	1		0.960489	0.968666	1.1761		0.843795	-0.245035	5.41064	0.704686
CG14196	5782	-	1		0.0943035	0.017027	0.11133		0.61899	0.105601	1		0.589094	0.476306	0.604458		0.785857	-0.347662	6.11226	0.644818
CG7884	15289	+	1		0.0943035	0	0.0943035		0.394878	0.32421	0		0.964895	0.962535	-		0.764581	-0.387258	2.06586	0.808365
Muc18B	1074	+	1		0	0	0		-	-	-		-	-	-		1	5.13e-15	-1.36554	1
Mur18B	1683	+	1		0	0	0		-	-	-		-	-	-		0.45087	-1.14922	-1.00514	1
CG14195	2816	-	1		0	0	0		-	-	-		-	0	-		1.11573	0.157994	-1.04926	1
Ulp1	5546	-	1		4.36154	0.660124	5.02166		1.98301	2.43736	0		1.57302	0.842617	1.11792		1.5881	0.667298	4.34859	0.382186
CG7990	5720	-	1		0.0943035	0.424366	0.518669		-	-	-		6.75426	0.160423	1.03333		1.2677	0.342214	0.30503	0.737266
CG14194	2479	+	1		2.40769	0.0471517	2.45484		0.95029	0.24822	1		1.92979	0.822247	1.24385		1.0868	0.120086	5.30779	0.875916
CG7914	948	-	1		1.65031	0	1.65031		1.07704	0.149928	1		1.3168	1.00629	0.741436		1.449	0.535062	5.63426	0.544829
CG14193	816	+	1		0.424366	0.0943035	0.518669		1.14984	0.358393	1		3.06837	2.32613	3.17876		1.25439	0.326986	5.28978	0.633146
Mec2	2159	+	1		0	0.990186	0.990186	3.58071	11.9647	9.26842	1		6.56665	4.9507	10.2119		7.31776	2.8714	7.09186	0.00777932
CG33253	3856	+	1		0	0.345779	0.345779		-	-	-		1.93589	2.17967	-		0.685861	-0.544013	0.208433	0.774452
CG7453	1847	+	1		15.0886	0	15.0886		0.746203	0.112804	1		1.59801	0.724714	1.11362		0.801458	-0.319301	6.75092	0.687979
CG7556	2959	-	1		1.98037	0.0471517	2.02752		0.725593	0.225902	1		1.03829	0.813282	0.942785		0.766026	-0.384534	5.99661	0.610007
pncr004:X	3819	-	1		0	0	0		-	-	-		-	-	-		1	5.13e-15	-1.36554	1
inx5	1885	-	1		0	0	0		-	-	-		-	-	-		0.109369	-3.19273	-1.16687	0.358052
RhoGAP18B	29104	-	2.2958		771.924	0.572314	772.496		0.805127	0.0450386	1		1.59622	0.526197	1.00033		0.95805	-0.0618275	5.95936	0.938768
Obp18a	789	-	1		0.28291	0	0.28291		0.961924	0.743012	1		0.192979	0.962535	0.346452		1.08864	0.122521	1.37397	0.938599
tgy	2041	-	1		0	0	0		-	-	-		0	0	0.516667		0.850588	-0.233468	-0.285182	1
CG15882	636	-	1		0.0471517	0	0.0471517		-	-	-		2.89468	-	-		4.89504	2.29132	-0.756849	0.340639
CG7423	595	-	1		0	0.0471517	0.0471517		-	-	-		-	-	-		1	5.13e-15	-1.36554	1
CG14191	900	+	1		0	0	0		-	-	-		0	0	-		0.769573	-0.37787	-0.94477	1
CG7406	870	+	1		0.0471517	0	0.0471517		-	-	-		0	-	-		0.0595896	-4.0688	-0.940252	0.167807
CG34330	620	-	1		9.00598	0.707276	9.71326		0.276838	0.233026	0		0.926681	0.759896	0.189075		0.275608	-1.85931	6.46129	0.072531
CG14190	2007	+	1		0.0943035	0.0471517	0.141455		-	-	-		-	-	-		0.20587	-2.28019	-1.26383	1
CG34329	505	+	1		0.0943035	0	0.0943035		-	-	-		-	-	-		1.27832	0.354246	-0.940673	1
CG42506	96514	+	1		72.476	3.70742	76.1834		0.472401	0.141924	1		1.65411	0.401056	0.480461		0.527057	-0.923968	4.14267	0.215433
CG32541	96514	+	1		72.476	3.70742	76.1834		0.472401	0.141924	1		1.65411	0.401056	0.480461		0.527057	-0.923968	4.14267	0.215444
CG7378	8888	+	1		0.301771	3.22989	3.53167		1.72334	1.80285	0		4.34203	2.24592	-		1.19065	0.251749	0.673188	0.850991
CG7349	2077	+	1		0.0281644	0.518669	0.546833		-	-	-		-	8.66282	-		0.790734	-0.338735	1.6327	0.865991
CG7358	4624	-	1		10.3262	0.0471517	10.3734		0.664548	0.358738	1		0.540765	0.898366	0.949342		0.770717	-0.375727	3.84336	0.643856
CG7332	3106	+	1		1.32025	0.0943035	1.41455		1.71333	0.868674	1		1.98917	0.729194	2.00681		1.92208	0.942671	2.80902	0.337337
CG34401	15199	+	1		15.2069	0.0943035	15.3012		1.03892	0.661118	1		1.86474	0.752845	1.04189		0.903393	-0.146574	5.43863	0.843152
CG7326	2159	-	1		10.1376	0.0471517	10.1848		0.853025	0.657899	1		1.19532	1.23755	1.64096		0.754253	-0.406879	2.36827	0.65994
CG32544	717	+	1		0.0471517	0.141455	0.188607		-	-	-		-	-	-		0.206278	-2.27734	-1.26383	1
CG7288	1863	+	1		2.49904	0	2.49904		2.15248	2.24112	0		1.49989	0.860545	1.27239		1.35004	0.433007	3.12354	0.60447
CG7322	1533	-	1		0.0471517	0.0471517	0.0943035		0.987637	0.200959	1		1.05679	0.743777	-		1.42424	0.510194	5.36863	0.623233
CG7280	2170	-	1		0.848731	0	0.848731		0.809844	0.419355	1		0.76294	0.651562	1.20851		0.866574	-0.206605	3.85133	0.809831
CG34422	11950	+	0.667147		3.86644	1.13164	4.99808		1.29401	0.800086	1		1.4078	0.591238	0.799159		1.26195	0.335652	3.36443	0.65248
Pvf1	10199	+	1		0.710903	0.377214	1.08812		2.4537	1.79133	1		2.89468	1.8084	4.06011		2.01593	1.01144	3.12414	0.348371
CG7101	1558	+	1		1.22595	0.0471517	1.2731		0.931732	0.569678	1		0.585829	0.888494	0.726344		1.26986	0.344675	2.42545	0.724429
CG42450	6027	+	1		0	0	0		-	-	-		-	-	-		1	5.13e-15	-1.36554	1
CG7058	5309	+	1		0.0943035	0	0.0943035		-	-	-		-	0.213897	1.16297		1.40737	0.492998	0.405379	0.752513
bnb	3160	-	1.35151		0.660124	0.149314	0.809438		0.367643	0.358485	0		1.89533	0.324043	0.714802		0.293703	-1.76757	4.87741	0.0778248
CG7053	1850	+	1		2.6405	0	2.6405		0.874722	1.05264	0		1.38704	0.715398	1.30235		1.1866	0.246832	2.66914	0.847624
Pk17E	17592	+	1		4.87122	1.55601	6.42723		0.800076	0.595564	1		1.19193	0.799645	0.605877		0.956531	-0.064116	2.82538	0.946537
CG6961	2064	-	1		3.3242	3.21811	6.5423		0.706506	0.0990768	1		1.13391	0.833927	0.747876		0.739338	-0.435694	4.58985	0.522425
CG6900	406	+	1		4.09827	3.7407	7.83898		1.14327	0.447658	1		1.74059	1.55487	1.11272		1.57184	0.652451	5.79129	0.522302
CG18259	2227	-	1		6.31833	5.52854	11.8469		0.699205	0.180041	1		1.12077	0.849562	0.948697		0.827379	-0.273381	4.76614	0.681742
CG6891	6116	+	1.35844		7.72896	5.0138	12.7428		1.22339	0.248123	1		1.85122	1.31767	2.37576		1.38953	0.474596	9.7413	0.590946
CCKLR-17D3	9749	-	1		0.378561	0.0521151	0.430676		0.802334	0.387317	1		0.20102	0.449183	0.743664		1.10497	0.144013	2.81035	0.88907
CG12609	1938	-	1		0	0.0471517	0.0471517		-	-	-		-	-	-		0.73419	-0.445774	-0.518552	0.800518
CG6873	680	-	1		0	0	0		-	-	-		-	-	-		0.206565	-2.27533	-1.26383	1
CG42302	366	-	1		0	0	0		-	-	-		-	-	-		1	5.13e-15	-1.36554	1
Cyp308a1	1775	+	1		0	0.0471517	0.0471517		-	-	-		-	0.481268	1.5276		0.663583	-0.591652	-1.19042	1
CCKLR-17D1	19079	-	1		0.0471517	0.0943035	0.141455		0.465287	0.119778	1		0.723671	0.357679	0.867159		0.540582	-0.887414	6.04993	0.20677
Cyp18a1	4209	-	1		8.4916	0.0660124	8.55761		0.665064	0.180732	1		1.17465	0.556028	0.839118		0.729531	-0.454958	4.12781	0.503432
phm	2456	+	1		0	0	0		1.07312	0.754843	1		0.964895	2.40634	-		1.54448	0.627119	2.05987	0.566616
CG6696	1665	-	1		0	2.12183	2.12183		-	-	-		0	0	-		6.69807	2.74375	-0.882687	0.20137
fu	3477	+	1		2.21613	0	2.21613		0.864346	0.536547	1		1.91315	0.804144	1.10879		0.930585	-0.103791	2.73344	0.899358
CG6659	3895	-	1		3.96075	0.0471517	4.0079		1.17309	0.985227	0		1.49023	0.950833	0.996792		1.10733	0.147084	3.56359	0.859152
Ing3	2374	-	1		0.990186	0	0.990186		1.06264	0.396604	1		0.573343	0.759896	1.03786		1.31239	0.392193	6.67168	0.717973
CG6617	1051	-	1		5.06095	2.6405	7.70145		0.822675	0.211339	1		1.15021	0.909061	0.892966		0.918161	-0.123181	6.3677	0.904943
CG6540	1303	+	1		3.34777	4.68374	8.03151		1.08096	0.116416	1		1.10915	1.01259	1.62938		1.37214	0.456426	6.85068	0.612275
Rip11	11922	-	1.82018		2.93912	0.0546361	2.99376		1.24234	0.671383	1		2.1627	0.809857	0.921137		1.22474	0.29247	4.57963	0.699213
wgn	10855	-	1		9.67848	0.0707276	9.74921		0.824833	0.34149	1		1.06138	0.742294	0.673407		0.934117	-0.0983253	3.87174	0.909362
CG43289	380	+	1		0	0.28291	0.28291		-	-	-		-	-	-		1	5.13e-15	-1.36554	1
CG15040	5872	-	1		0.0471517	0.471517	0.518669		-	-	-		-	0	1.03333		1.04814	0.0678366	2.3389	0.98439
CR43492	1002	-	1		0	0	0		-	-	-		-	-	-		1	5.13e-15	-1.36554	1
Bx	37062	+	1		13.577	0.123485	13.7005		0.518065	0.0830451	1		1.69688	0.737644	0.656052		0.620385	-0.688765	4.58086	0.443954
CG15047	581	+	1		0	0	0		0.852224	0.30714	1		1.15787	0.872699	0.582642		1.03316	0.047068	5.62328	0.948222
CG15042	1405	-	1		0	0	0		-	-	-		-	-	-		0.192307	-2.37852	-1.13149	1
CG6481	1374	-	1		0	1.13164	1.13164		-	-	-		-	-	-		0.498932	-1.00309	-1.07545	1
CG15048	408	+	1		0.0471517	0	0.0471517		-	-	-		-	0.320845	0.763799		0.575207	-0.797847	-0.364281	0.727303
Aats-his	5049	+	1		0	0	0		-	-	-		-	-	-		1	5.13e-15	-1.36554	1
CG6470	1990	-	1		0.0943035	0.0943035	0.188607		-	-	-		1.92979	0.481268	-		1.02289	0.0326463	-0.0292274	1
Ggt-1	6479	-	1		0.377214	0.0496334	0.426847		0.745621	0.210352	1		1.51626	0.948381	1.01592		0.86117	-0.21563	5.51643	0.770716
Wnt5	3848	-	1		6.40478	0.848731	7.25351		0.856609	0.297628	1		4.34203	0.787268	1.02643		0.995136	-0.00703464	4.42756	1
Rad51D	1077	+	1		0.754428	0.377214	1.13164		-	-	-		0.385958	0.561479	0.86914		0.685624	-0.54451	0.178411	0.654262
GalNAc-T2	4694	-	1		7.07276	0.141455	7.21422		0.664753	0.149606	1		1.07325	0.815899	0.758552		0.694613	-0.52572	6.01158	0.502706
CG15043	764	-	1		0.330062	0	0.330062		0.753153	0.330827	1		0	3.85014	-		1.03105	0.0441123	0.151053	1
CG15044	814	-	1		0	0	0		-	-	-		-	-	-		1	5.13e-15	-1.36554	1
CG15046	1839	-	1		0	0.0471517	0.0471517		0.686425	0.466578	1		0.964895	0.320845	0.516667		0.677682	-0.56132	1.82823	0.638685
psh	2440	-	1		0	0	0		-	-	-		-	0.481268	-		0.818073	-0.289699	-0.847757	1
CG6361	3644	-	1		0	0.00392931	0.00392931		0.410169	0.160666	1		0.241224	1.92507	0.656452		0.450558	-1.15021	0.493088	0.280525
CG32547	35732	-	1		0.518669	0.0062466	0.524916		-	-	-		0	0.962535	-		1.29942	0.377868	-0.589655	0.824465
CG32551	395	+	1		0	0	0		-	-	-		-	-	-		1	5.13e-15	-1.36554	1
CG6290	732	+	1		0	0	0		-	-	-		-	-	-		1	5.13e-15	-1.36554	1
CG32548	4867	-	1		0.0471517	0	0.0471517		-	-	-		-	-	-		0.206307	-2.27714	-1.26383	1
CG42323	4567	+	1		0	0	0		-	-	-		-	-	-		1.51581	0.600093	-0.903656	0.847487
CG15056	1400	+	1		0	0	0		-	-	-		2.65346	1.34755	1.25806		0.434973	-1.201	0.272655	0.434641
CG34328	402	-	1		0.518669	0	0.518669		0.771218	0.528329	1		0	0.962535	1.09704		1.13291	0.180028	0.119909	0.945779
CG32549	19648	-	1		19.2379	0.14342	19.3813		0.857678	0.515486	1		1.97512	0.973302	1.14111		0.923912	-0.114173	4.14093	0.867212
Tsf1	2413	+	1		0	0.235759	0.235759		-	-	-		-	0.481268	-		1.44488	0.53095	0.387921	0.774379
betaCop	3649	-	1		2.02752	0.0471517	2.07468		1.13692	0.845751	1		0.981774	0.767349	1.12945		1.08506	0.117773	3.30176	0.898192
CG6179	1407	+	1		1.83892	0.0471517	1.88607		1.28766	0.467819	1		0.906416	0.66959	0.613105		1.23254	0.30163	5.25332	0.712151
por	2331	-	1		10.727	9.94902	20.676		0.833384	0.231564	1		0.91665	0.880965	1.08878		1.14916	0.200575	6.92498	0.826827
CrebB-17A	9891	+	1		4.03322	0.805207	4.83843		0.955413	0.191543	1		1.08353	0.678622	0.723993		1.09667	0.133127	5.08509	0.865114
CG6106	3079	+	1		2.92341	0	2.92341		-	-	-		0.964895	0	0.258333		0.623964	-0.680465	0.715906	0.721603
CG6123	32689	-	1		12.8724	0.364001	13.2364		-	-	-		-	0.962535	-		0.639377	-0.64526	-0.30091	0.775396
CG6023	7043	-	1		0.34185	4.33953	4.68138		0.560809	0.270062	1		0.614024	0.387227	0.408444		0.586281	-0.770336	3.2728	0.439196
os	3645	-	1		0	0	0		-	-	-		0.964895	1.37505	-		2.16935	1.11726	0.344241	0.339402
upd3	7366	+	1		0.377214	0.188607	0.565821		1.05399	0.666151	1		2.76603	0.672066	0.972926		0.751531	-0.412095	3.05168	0.677113
CG15059	623	-	1		0	0	0		-	-	-		-	-	-		1	5.13e-15	-1.36554	1
upd2	2528	-	1		0.188607	0	0.188607		0.810573	0.261414	1		0.964895	0.628181	0.9054		0.825433	-0.276776	2.08886	0.788056
CG33639	15265	-	1		0.0044158	0	0.0044158		-	-	-		-	-	-		0.288807	-1.79182	0.406944	0.314269
Him	1311	+	1		0	0	0		-	-	-		0.222668	0.180475	0		0.712382	-0.489278	1.61515	0.674337
Her	742	-	1		0	0.0471517	0.0471517		0.833902	0.320251	1		0.890672	0.523912	2.36631		0.797249	-0.326897	7.40629	0.747868
Frq2	16682	+	1		0.10228	0.410781	0.513061		18.2227	25.7043	0		4.28842	1.91582	2.87628		5.31544	2.41019	4.37818	0.00906636
Andorra	947	-	1		0	0	0		-	-	-		-	-	-		0.368932	-1.43857	-1.28275	1
Frq1	15155	+	1		0.0179626	0	0.0179626		-	-	-		-	-	-		0.850752	-0.233189	-0.305334	0.935969
CG43229	338	+	1		0.0471517	0	0.0471517		-	-	-		-	-	-		1	5.13e-15	-1.36554	1
ari-1	7238	-	1		9.17494	0.0314345	9.20638		0.854463	0.364147	1		1.44734	0.769206	1.23412		0.919422	-0.121201	5.74553	0.858628
CG43133	594	-	1		0	0	0		0.628335	0.329461	1		0.989636	0.605022	0.729355		0.575069	-0.798194	6.14019	0.408205
CG32553	2461	-	1		0	0	0		-	-	-		-	-	-		1	5.13e-15	-1.36554	1
wupA	11270	-	1		0.471517	0.0707276	0.542245		0.330559	0.357295	0		3.47362	0.175006	0.3819		0.594504	-0.750242	1.0872	0.571161
CG7135	1713	+	1		0.28291	0.0471517	0.330062		-	-	-		-	-	-		0.373252	-1.42178	-0.43199	0.410846
Taf8	1511	+	1		1.74461	0	1.74461		0.784294	0.180546	1		1.50874	0.87843	1.2101		0.963746	-0.0532749	3.99437	0.949911
CG7192	3766	-	1		7.74467	0.810813	8.55549		0.738222	0.245189	1		2.82514	0.823829	1.25195		0.792091	-0.336261	5.55274	0.637794
RhoGAP16F	4253	+	1		3.63068	0.565821	4.1965		1.63626	1.64526	0		1.31577	0.763917	1.0733		0.803731	-0.315215	2.79088	0.796623
scu	1608	+	1		0.330062	0.0471517	0.377214		0.989211	0.346817	1		0.823159	1.10837	1.22734		1.56189	0.643297	8.72125	0.591776
CG7206	1785	-	1		1.17879	0.0943035	1.2731		0.659945	0.348407	1		1.18889	0.730199	0.950108		0.851556	-0.231827	3.87574	0.783893
dik	2661	+	1		7.26137	0.330062	7.59143		1.48361	0.622636	1		1.2043	1.12156	1.24031		1.47485	0.560567	3.46036	0.459585
CG7536	9536	-	1		9.94902	7.30852	17.2575		0.70868	0.357103	1		1.3139	0.889786	1.12669		0.826021	-0.275749	3.55711	0.756773
Dhc16F	13871	+	1		0.895883	0.612973	1.50886		-	-	-		-	0	-		7.33064	2.87394	-1.11714	0.566185
CG15373	4560	+	1		0	0	0		-	-	-		-	-	-		0.370152	-1.43381	-1.28275	1
CG6867	4391	+	1		0	0.0471517	0.0471517		-	-	-		-	-	-		1.2616	0.335252	-1.11231	1
CG12672	1596	-	1		0.00893025	0	0.00893025		-	-	-		-	0.939059	0.3819		8.56838	3.09902	-0.426914	0.0971711
tyn	23595	+	1		80.7903	0.241784	81.032		-	-	-		5.30692	1.10226	1.31001		1.10309	0.141546	3.10297	0.928902
Sh	134199	-	1		1.26536	1.63821	2.90357		-	-	-		0	0.49749	0.172222		0.468831	-1.09286	1.78719	0.452819
CG6847	12703	+	1		2.26328	0	2.26328		-	-	-		0.192979	1.65006	1.3853		0.265382	-1.91386	-0.611223	0.27109
Vps4	3031	+	1		3.63068	0.0943035	3.72499		0.881021	0.231169	1		1.61364	0.871583	1.0449		1.00883	0.0126814	5.51057	0.988955
CG7772	1254	-	1		1.24166	0	1.24166		1.10865	0.390858	1		0.706441	1.11778	4.85968		1.53092	0.6144	6.18504	0.556261
GS	6324	+	1		6.25625	0.353638	6.60989		0.759418	0.176897	1		1.03324	0.695178	1.16787		0.892014	-0.164861	6.06758	0.815804
CG32495	6324	+	1		6.25625	0.353638	6.60989		0.759418	0.176897	1		1.03324	0.695178	1.16787		0.892014	-0.164861	6.06758	0.815788
GS	9057	+	1		6.25625	0.353638	6.60989		0.759418	0.176897	1		1.03324	0.695178	1.16787		0.892014	-0.164861	6.06758	0.815798
CG32495	9057	+	1		6.25625	0.353638	6.60989		0.759418	0.176897	1		1.03324	0.695178	1.16787		0.892014	-0.164861	6.06758	0.815779
CG6788	1228	+	1		0.0157172	0.0235759	0.0392931		1.1877	0.884577	1		0	1.20317	-		1.02232	0.0318506	0.842699	1
CG12985	1521	+	1		0	0.188607	0.188607		-	-	-		0	-	-		0.198842	-2.33031	-1.26352	0.607481
mnb	24523	-	1		24.3434	1.60316	25.9466		0.808925	0.348322	1		1.55868	0.767317	1.03166		0.79362	-0.33348	5.42697	0.649299
CG6769	1773	+	1		0.895883	0.471517	1.3674		0.945972	0.149198	1		0.945975	0.791651	1.47392		1.35412	0.437354	6.64198	0.654399
Arp8	2429	-	1		1.41455	0.235759	1.65031		0.975073	0.188485	1		1.20612	0.566197	0.878808		1.27982	0.355944	5.62615	0.66765
CG6762	1460	+	1		0.0943035	0.471517	0.565821		0.943467	0.353212	1		1.73681	0.711439	1.41523		1.12328	0.167717	3.89386	0.867866
CG32557	3166	-	1		0.518669	0	0.518669		-	-	-		-	0	-		0.53823	-0.893706	-1.01115	1
CG32554	817	-	1		0.235759	0.0471517	0.28291		-	-	-		0.771916	0.962535	-		0.704813	-0.504687	1.33929	0.704636
CG6506	1406	+	1		0.471517	0	0.471517		0.75239	0.371946	1		0.8148	1.29182	1.06014		0.669956	-0.577861	3.52623	0.475991
CG15814	2254	-	1		2.31044	0.660124	2.97056		0.699348	0.245081	1		1.09647	0.820986	0.981437		0.798064	-0.325423	5.16383	0.676499
Ucp4A	2957	+	1		2.52262	0	2.52262		0.873177	0.224144	1		1.03576	0.743344	0.829424		1.06131	0.0858395	4.73619	0.909255
CG8142	1325	-	1		0.28291	0.235759	0.518669		0.58476	0.0746256	1		1.10907	0.85024	1.77473		0.698256	-0.518172	5.25125	0.498996
e(y)1	1174	+	1		0.754428	0	0.754428		0.804228	0.230252	1		1.2696	0.839659	1.17312		0.992591	-0.0107286	5.49538	0.991999
CG6398	10756	+	1		0.235759	0	0.235759		-	-	-		0	0.962535	-		1.24983	0.321728	-0.535703	0.792633
Socs16D	5159	-	1		1.39883	0	1.39883		0.717425	0.474518	1		2.0504	0.664844	1.13508		0.879994	-0.184434	2.76032	0.8419
CG12986	378	-	1		0	0	0		-	-	-		-	-	-		1	5.13e-15	-1.36554	1
OdsH	22939	+	1		1.94146	4.56939	6.51084		-	-	-		-	-	-		1	5.13e-15	-1.36554	1
unc-4	11501	+	1		0.0943035	0.00943035	0.103734		-	-	-		-	-	-		1.01147	0.0164492	-1.16758	1
CG42684	41541	+	1.23434		28.4745	0.377214	28.8517		1.03472	0.552471	1		1.35579	0.746795	0.970241		1.09466	0.130487	5.30904	0.848521
CG8173	2258	-	1		3.34777	0	3.34777		0.875936	0.347317	1		1.09811	0.771664	1.10421		1.03101	0.0440611	5.67481	0.962606
par-6	3768	+	1		30.8137	0.0471517	30.8608		0.962968	0.412417	1		1.8022	0.914253	1.1875		0.990045	-0.014434	5.69186	0.988627
CG8188	3190	-	1		6.12973	0.0471517	6.17688		0.814319	0.242353	1		1.31577	0.774672	0.933298		0.836853	-0.256953	3.40871	0.796074
chas	26076	-	1		1.74461	0.389002	2.13362		6.31755	2.62737	1		5.35078	2.99074	3.21493		5.46146	2.44929	1.66055	0.00863889
CG12990	2681	-	1		0.0471517	2.12183	2.16898		-	-	-		0	0	-		0.745891	-0.422963	-0.999825	1
beta-Spec	11816	+	1		20.0395	0.28291	20.3224		1.44803	1.41777	0		2.08934	0.708917	0.971859		1.36913	0.453256	4.85057	0.516903
IntS2	4051	-	1		1.55601	0.0471517	1.60316		1.53769	0.970695	1		1.46744	0.740412	1.00266		1.53422	0.617501	2.0318	0.506248
RhoGAPp190	13410	-	1		11.507	1.22725	12.7342		0.849171	0.478347	1		2.34556	0.684642	1.10852		0.743772	-0.427067	5.67469	0.613476
CG5800	2723	+	1		1.2731	0	1.2731		2.30128	1.5591	1		1.36693	0.756945	0.917344		2.2399	1.16343	2.41428	0.167755
CG8289	2352	-	1		3.86644	0.330062	4.1965		1.10876	0.422457	1		1.65298	0.806372	1.05034		1.08262	0.114532	4.80888	0.889786
CG5703	1418	+	1		1.08449	0.0471517	1.13164		0.90284	0.255023	1		0.952525	0.871587	1.79713		0.919904	-0.120445	7.39459	0.912976
CG8316	2236	-	1		0.895883	0.188607	1.08449		0.534995	0.719313	0		1.65411	0.721902	0.548522		0.415253	-1.26794	2.63002	0.2753
CG8326	1313	-	1		0.518669	0	0.518669		0.769771	0.200805	1		2.61089	0.910971	1.09704		0.77969	-0.359027	2.62936	0.755288
CG8408	4683	-	1		29.4463	0.424366	29.8706		0.963833	0.236401	1		1.14097	0.733476	0.651837		1.14325	0.193145	7.64116	0.806778
X11L	7269	+	1		9.02956	0.188607	9.21816		1.01436	0.804343	1		2.01297	0.6857	1.03119		0.944335	-0.08263	2.52206	0.915831
CG12992	1429	+	1		0	0	0		-	-	-		-	-	0.936022		0.205784	-2.2808	-1.26383	1
CG12991	19105	+	1		0.518669	0.0943035	0.612973		-	-	-		5.98235	1.03658	1.49665		1.44851	0.534574	1.50858	0.689983
l(1)G0222	7376	-	1		4.90378	0.148191	5.05197		1.17193	0.537236	1		1.27759	0.802565	1.10409		1.22244	0.289764	4.219	0.700023
ppk23	2350	-	1		0.235759	0	0.235759		-	-	-		-	0	-		3.47266	1.79604	-1.09389	0.344449
CG12432	1791	-	1		0.0505197	0.0471517	0.0976715		-	-	-		0	0.481268	0.903584		0.670119	-0.57751	-0.346275	1
CG8557	50473	-	1		75.3249	0.648336	75.9732		0.746632	0.545323	1		1.84602	0.782743	1.27679		0.77963	-0.359139	5.25548	0.630164
CG8568	3559	-	1		0.80158	0	0.80158		-	-	-		-	1.92507	-		1.23625	0.305972	-0.489993	1
p-cup	2427	-	1		3.44208	0	3.44208		-	-	-		-	-	0.209677		5.34268	2.41756	-1.26327	0.605295
CG5613	5144	+	1		0.895883	0.141455	1.03734		0.698375	0.76793	0		1.20612	0.679437	2.71075		0.498244	-1.00508	2.18125	0.250987
CG12994	21675	-	1		0.707276	1.32025	2.02752		-	-	-		-	-	-		5.35513	2.42092	-1.26327	0.606079
CG8611	8359	-	1		8.81847	0	8.81847		0.893036	0.328999	1		1.02056	0.804093	0.882033		0.928468	-0.107076	4.12383	0.897519
B-H1	5779	+	1		0.0303118	0.0471517	0.0774636		-	-	-		-	0	-		2.95365	1.5625	-0.988212	0.827343
CR43491	629	-	1		0	0	0		-	-	-		-	-	-		1	5.13e-15	-1.36554	1
B-H2	9582	+	1		2.55512	0.674617	3.22974		-	-	-		-	-	-		0.233576	-2.09804	-0.902698	0.466619
CG5445	3002	+	1		2.21613	0	2.21613		0.625674	0.227987	1		1.56392	0.686459	0.954051		0.665463	-0.58757	5.37497	0.420421
Fim	16276	-	1		21.454	0.28291	21.737		0.742967	0.263909	1		1.9004	0.75559	0.963059		0.888959	-0.169812	6.0431	0.836627
CG8661	723	-	1		0	0	0		-	-	-		-	0.962535	0.936022		0.873265	-0.195508	-0.802056	1
CG8664	935	-	1		0	0	0		-	-	-		-	0	-		0.0678814	-3.88084	-0.996528	0.315965
CG8675	1171	-	1		1.83892	0	1.83892		0.912449	0.36771	1		0.896548	0.996912	1.18494		1.01617	0.0231362	3.93873	0.983949
CG42854	1025	-	1		0.0471517	0	0.0471517		-	-	-		-	0.577521	-		0.806292	-0.310626	0.606027	0.90707
CG8915	3746	-	1		4.62087	0.0471517	4.66802		2.25544	1.81993	0		1.80283	0.714139	1.45721		1.75806	0.813986	2.51754	0.351621
f	48023	+	1		0.143696	26.3142	26.4579		0.525375	0.532165	0		1.18756	1.02269	0.596057		0.796113	-0.328955	1.21039	0.824118
CG10597	1396	-	1		0	0	0		-	-	-		-	-	-		1	5.13e-15	-1.36554	1
CG10598	730	-	1		0	0	0		-	-	-		-	-	-		5.35439	2.42072	-1.26327	0.606032
CG34327	693	-	1		0	0	0		-	-	-		-	-	-		5.3496	2.41943	-1.26327	0.605729
CG5172	1208	+	1		0	0	0		-	-	-		-	-	-		0.351602	-1.50798	-0.988475	0.768601
CG12998	613	+	1		0	0.0471517	0.0471517		-	-	-		-	-	-		1	5.13e-15	-1.36554	1
CG5162	1915	+	1		0	0	0		-	-	-		-	-	-		1	5.13e-15	-1.36554	1
CG18258	1650	+	1		0.0471517	0.0471517	0.0943035		-	-	-		-	-	-		0.984105	-0.0231163	-1.20688	1
CG12995	522	-	1		0	0	0		-	-	-		-	-	-		0.160552	-2.63889	-1.18584	0.584007
CG32563	574	+	1		0.0943035	0	0.0943035		-	-	-		-	-	-		1	5.13e-15	-1.36554	1
CG32564	1447	+	1		0.141455	0	0.141455		-	-	-		0	-	-		2.09879	1.06956	-0.82055	0.77503
CG5070	812	+	1		0	0	0		-	-	-		-	-	0.516667		1.08067	0.111921	-0.121225	1
CG8918	1873	-	1		0	0.471517	0.471517		-	-	-		-	-	-		3.98393	1.99419	-1.20884	1
baz	35289	+	0.667147		21.3624	1.36832	22.7307		1.01593	0.600032	1		1.28173	0.643734	1.26919		0.968722	-0.0458458	2.96034	0.952543
xmas-2	5197	-	1		2.49904	0	2.49904		1.26643	1.21717	0		1.82822	0.601585	0.948211		1.29497	0.372915	2.32578	0.750389
xmas-1	3362	-	1		2.26328	0	2.26328		-	-	-		4.99475	0.81512	1.0345		1.07031	0.0980236	1.73724	0.9404
CG5010	1610	+	1		7.56785	0.660124	8.22798		1.03118	0.260732	1		1.21798	0.981851	1.59442		1.25996	0.333376	8.49162	0.726072
RpS5a	4668	-	1		8.81737	0.0869497	8.90432		0.907532	0.100501	1		0.965069	0.953336	1.29615		1.23	0.298662	11.1612	0.769681
mei-217	6413	-	1		4.66802	0.424366	5.09239		0.907188	0.49773	1		2.35548	0.723099	1.56129		0.958339	-0.0613914	3.85374	0.939307
mei-218	7012	-	1		7.92149	0.754428	8.67592		0.86895	0.577563	1		2.51381	0.745039	1.53931		0.903811	-0.145907	4.08895	0.828546
CG5004	28396	+	1		49.804	0.213755	50.0178		1.18668	0.534421	1		2.05406	1.00287	0.933583		1.24023	0.310605	4.52106	0.672849
Arpc3B	1282	-	1		0.0943035	0	0.0943035		1.33847	0.491574	1		2.06137	1.07254	1.08814		1.38983	0.474905	4.39801	0.503294
CG4991	3287	+	1		0.0471517	0	0.0471517		-	-	-		0	2.88761	-		1.31935	0.399827	-0.804433	1
CG16700	6634	+	1		1.51017	0.141455	1.65162		-	-	-		-	2.24592	-		0.798638	-0.324386	0.952331	0.745955
CG4955	1855	+	1		0.0471517	0	0.0471517		-	-	-		4.82447	0.320845	0		0.391128	-1.35429	-0.453666	0.584983
CG8945	7190	-	1		0	2.02752	2.02752		-	-	-		0.723671	0	-		1.50721	0.591881	-0.107133	0.885776
CG4949	2051	+	1		8.06295	0	8.06295		1.17135	0.432557	1		2.57305	0.736941	1.4557		1.11387	0.155585	2.62617	0.857469
CG8949	9181	-	1		10.0501	0	10.0501		1.24739	0.79088	1		1.78746	0.742096	1.17791		1.24082	0.311296	5.00594	0.661216
CG43077	1220	-	1		0.0471517	0	0.0471517		-	-	-		-	-	-		1	5.13e-15	-1.36554	1
CG34326	253	-	1		0	0	0		-	-	-		-	-	-		0.601552	-0.733237	-0.90245	0.872231
CG12433	1642	+	1		0	0	0		-	-	-		-	-	-		0.205769	-2.2809	-1.26383	1
CG9059	46002	-	1		0.579659	2.31232	2.89198		-	-	-		-	-	-		3.13379	1.64791	-0.842339	0.581526
CG9086	11705	-	1		9.50107	2.19256	11.6936		0.779716	0.7028	0		2.12277	0.762967	1.07539		1.06921	0.0965464	4.58582	0.925789
RhoGAP15B	7136	+	1		50.9239	0.235759	51.1596		1.00912	0.408039	1		1.67508	0.854839	1.26278		1.1313	0.177984	5.0581	0.803049
CG13000	333	-	1		0	0.235759	0.235759		-	-	-		-	-	-		1.24661	0.318011	-0.98789	1
CG13001	1783	-	1		1.22595	0.0943035	1.32025		0.931773	0.197087	1		1.78296	0.714026	1.44821		0.987937	-0.0175086	4.29064	0.993912
wus	2330	-	1		7.07276	0.0471517	7.11991		0.89134	0.187565	1		1.30663	0.737426	0.996806		1.07144	0.0995497	5.2785	0.886638
CG4928	24214	+	1.11717		6.99943	0.123773	7.12321		0.543472	0.199864	1		2.58592	0.61339	0.80081		0.619225	-0.691465	5.32428	0.412269
CG33252	779	-	1		0.188607	0	0.188607		-	-	-		0	0	-		2.36167	1.23981	0.252411	0.354323
CG13002	828	+	1		0	0	0		-	-	-		-	-	-		2.91322	1.54261	-1.0468	0.567451
CG4880	1900	+	1		2.8291	0	2.8291		0.933644	0.317588	1		2.037	0.806974	1.61715		0.805465	-0.312107	3.71143	0.714615
CG9099	978	-	1		1.22595	1.2731	2.49904		0.793066	0.0624383	1		0.989118	0.820986	0.842082		0.99328	-0.00972822	7.35524	0.990868
Rcp	1282	+	1		1.08449	0.80158	1.88607		0.636638	0.38673	1		1.87901	1.31715	1.12697		0.853371	-0.228755	2.63962	0.846093
CG9104	1814	-	1		3.39492	0	3.39492		1.04171	0.951421	0		1.07383	0.944025	1.62491		0.718236	-0.477469	2.39153	0.610228
CG4872	1429	+	1		0.141455	22.8686	23.01		1.01243	0.765798	1		1.54383	0.544042	0.968459		0.897541	-0.15595	3.48806	0.882402
CG13003	13055	-	1		0.142527	0.199085	0.341612		0.937896	1.48158	0		-	0	-		0.525462	-0.928341	-0.0615619	0.572572
RSG7	6096	-	1		1.41455	6.36548	7.78004		-	-	-		0	0.481268	-		0.468904	-1.09264	1.00916	0.495543
CG13004	8834	-	1		5.99383	1.32025	7.31408		0.832948	0.441194	1		1.63198	0.962535	1.15516		0.795945	-0.32926	4.85238	0.693991
CG4829	14797	+	1		0.919459	26.2938	27.2133		0.55873	0.572269	0		-	0.962535	-		1.07422	0.103295	1.28515	0.964274
ppk28	2079	+	1		0.754428	0.471517	1.22595		1.04316	0.974849	0		0.701742	1.17643	2.80806		0.905847	-0.14266	0.89135	0.886819
CG13005	2082	+	1		15.7015	0.0943035	15.7958		-	-	-		1.50765	0.872298	1.41325		1.08269	0.11462	1.42785	0.950137
CG9125	1300	-	1		0.848731	0.188607	1.03734		0.961358	0.102913	1		1.27905	1.29444	2.38871		1.09696	0.133514	3.87693	0.84875
CG4789	1094	+	1		4.33796	3.44208	7.78004		0.837078	0.0845928	1		0.843609	0.862387	0.424841		1.06427	0.0898701	7.41873	0.920459
CG9132	3811	-	1.46868		81.9261	0.522598	82.4487		0.64204	0.22752	1		1.3727	0.706837	1.40582		0.719672	-0.474588	8.12143	0.529035
CG4768	4636	+	1		6.12973	0.144075	6.2738		1.31474	0.327948	1		2.89468	0.896678	1.1693		1.00405	0.00583179	4.23534	1
Rrp45	1781	-	1		6.50694	7.07276	13.5797		0.921696	0.215612	1		1.67349	0.829772	0.968459		0.985906	-0.0204776	2.67108	1
Sap30	1889	+	1		8.7938	7.19064	15.9844		-	-	-		1.86247	0.993923	2.38118		0.816547	-0.292392	3.05885	0.822902
CG9609	1614	-	1		1.08449	0	1.08449		1.47744	0.882234	1		2.41224	0.787529	0.995929		1.60842	0.68564	2.10396	0.538009
mRpL22	1139	+	1		0.848731	0.141455	0.990186		0.738545	0.133187	1		1.32871	1.04657	2.74812		0.95024	-0.0736358	5.28765	0.928425
if	31246	-	1		32.4168	0.154393	32.5712		0.998002	0.762703	1		1.28653	0.641216	0.90222		1.01123	0.0161173	5.26209	0.990032
Twdlalpha	1475	+	1		0	1.10807	1.10807		-	-	-		-	-	-		1	5.13e-15	-1.36554	1
CG32568	1734	+	1		0.0550104	3.82872	3.88373		-	-	-		-	-	-		0.0970206	-3.36557	-1.16718	0.444954
TwdlZ	633	+	1		0	2.07468	2.07468		-	-	-		-	-	-		1	5.13e-15	-1.36554	1
TwdlY	1030	+	1		0	1.24952	1.24952		-	-	-		-	-	-		1	5.13e-15	-1.36554	1
TwdlX	1540	+	1		0.754428	0.424366	1.17879		-	-	-		-	-	-		1	5.13e-15	-1.36554	1
CG9634	24608	-	1		22.8641	2.04994	24.9141		0.821613	0.666699	0		1.52775	0.979724	0.972473		0.959551	-0.0595679	1.86052	0.98183
CG32572	5773	+	1		4.99808	0.754428	5.75251		-	-	-		0.964895	-	-		1	5.13e-15	-1.36554	1
CG34325	6961	-	1		3.13559	0.333689	3.46928		0.987066	0.628315	1		1.34683	0.889891	0.615389		1.08011	0.111177	2.22124	0.933081
CG13008	3070	+	1		0	0.235759	0.235759		-	-	-		-	-	-		1	5.13e-15	-1.36554	1
CG9672	900	-	1		0	0	0		-	-	-		-	-	-		1	5.13e-15	-1.36554	1
CG4653	1198	+	1		0	0.0471517	0.0471517		-	-	-		-	-	-		1	5.13e-15	-1.36554	1
CG9673	1007	-	1		0	0	0		-	-	-		-	0	-		0.206684	-2.2745	-1.26383	1
spheroide	1500	-	1		0	0.0471517	0.0471517		-	-	-		-	0.481268	-		0.251414	-1.99186	-1.26613	1
CG9676	1019	-	1		0	0	0		-	-	-		-	-	-		1	5.13e-15	-1.36554	1
CG4678	15014	+	1		0.141455	0.425675	0.567131		-	-	-		-	-	-		2.75621	1.46269	0.195791	0.270666
Sep4	10963	-	1		7.63858	0.330062	7.96864		0.832557	0.181377	1		2.2215	1.04398	1.08595		0.845946	-0.241363	3.90688	0.778522
Axs	3807	-	1		3.84287	0.28291	4.12578		0.882923	0.139246	1		2.25142	0.729664	1.48637		1.01305	0.018699	3.77586	0.990089
sing	2488	+	1		0.0943035	3.5128	3.60711		-	-	-		-	0.192507	-		2.46201	1.29984	-0.0284738	0.466892
CG13010	681	-	1		0.471517	0.141455	0.612973		-	-	-		0.964895	0.721902	-		0.741587	-0.431313	0.107079	0.84744
CG13012	4209	-	1		0.0943035	0.754428	0.848731		-	-	-		-	0	-		2.84066	1.50623	-0.884338	0.795584
CG15865	3563	-	1		0	0.518669	0.518669		-	-	-		-	-	-		1	5.13e-15	-1.36554	1
r	13699	+	1		5.34386	0.0514383	5.3953		0.928857	0.565996	1		0.794306	0.720642	0.772815		0.809998	-0.30401	4.7511	0.681828
CG9723	1793	-	1		1.50886	0.0943035	1.60316		1.09777	0.337818	1		1.42437	1.04445	0.988441		1.18072	0.239666	3.93273	0.734025
CG32573	1900	+	1		0.707276	0.895883	1.60316		1.37962	1.30149	0		0.482447	0.452958	0.450299		1.24042	0.310831	1.06897	0.75579
CG42512	1900	+	1		0.707276	0.895883	1.60316		1.37962	1.30149	0		0.482447	0.452958	0.450299		1.24041	0.310816	1.06897	0.75576
mthl1	8793	+	1		22.8348	0.285268	23.1201		1.06595	0.411443	1		1.86087	0.753413	0.911614		1.02263	0.0322903	4.12194	0.969209
SmG	616	-	1		0.754428	0	0.754428		0.73368	0.264899	1		0.972836	0.855869	1.45269		0.886782	-0.173349	8.33606	0.830032
RpS19a	1042	+	1.53766		9.28889	0.0471517	9.33604		0.948053	0.171357	1		0.889291	0.821065	1.43398		1.46297	0.548896	12.5579	0.632377
CG9777	1564	-	1		0.141455	0	0.141455		-	-	-		2.89468	1.17643	0.969462		1.09061	0.125134	0.227702	1
rok	12311	-	1		10.9156	0.678461	11.5941		1.23088	0.832199	1		2.29348	0.671054	1.28366		0.849656	-0.235049	4.24706	0.780398
CG9782	6559	-	1		0.0342081	0.0530457	0.0872538		-	-	-		-	0	-		0.291519	-1.77834	-0.0856574	0.354113
mbt	4153	+	1		4.0079	0.0214989	4.0294		0.850009	0.310668	1		1.36448	0.733042	0.985262		0.857671	-0.221504	5.18533	0.769699
Nup153	11137	+	1.40251		14.8764	0.101537	14.9779		1.05429	0.68904	1		2.57659	0.704517	1.06202		1.12454	0.169338	4.95585	0.809455
CG9784	1949	-	1		0.660124	0.0471517	0.707276		0.748744	0.120324	1		1.18906	1.04088	1.11464		0.881708	-0.181627	3.53045	0.826226
crl	1742	+	1		3.39492	1.4617	4.85663		0.732981	0.157553	1		1.0402	1.12185	1.1608		0.838674	-0.253818	5.68035	0.707821
Cap	4428	-	1		2.97056	0.0943035	3.06486		1.93146	1.52296	1		1.5937	0.715104	0.755936		1.49409	0.579268	2.57405	0.506343
CG13014	1072	+	1		0.754428	0.518669	1.2731		0.896339	0.314395	1		1.80918	1.17462	1.19435		1.48063	0.56621	6.78521	0.609148
CanA-14F	25451	-	1		30.0938	3.3612	33.455		0.783428	0.317445	1		1.8572	0.877162	0.9935		0.646875	-0.62844	6.2526	0.52483
Pp2B-14D	5213	-	1		9.36748	0.192234	9.55971		1.28329	0.711466	1		1.68058	0.772745	0.68845		1.39411	0.479348	4.46112	0.510782
Arp14D	5755	-	1		13.9569	0.00471517	13.9616		0.652396	0.123367	1		1.65087	0.942667	1.02424		0.715924	-0.482122	5.77622	0.608093
CG9902	3935	-	1		0.565821	0	0.565821		-	-	-		-	0.644342	1.3942		2.63314	1.39678	1.99614	0.272043
CG9903	1700	-	1		0.330062	0	0.330062		-	-	-		0	0.137505	1.56004		0.993468	-0.00945419	1.00728	1
CG9906	1920	-	1		0.157172	0	0.157172		-	-	-		0.771916	0.717729	1.30228		1.3705	0.454704	0.816477	0.780057
para	68548	-	1		0.904062	1.04216	1.94623		1.10369	0.526793	1		2.89468	2.47509	1.97605		1.33796	0.420039	3.48945	0.646773
Rbp2	6296	+	1		41.836	0.0754428	41.9114		0.850279	0.234869	1		1.20612	0.72135	0.995722		0.901759	-0.149186	7.06276	0.838747
CG34015	735	-	1		0.754428	0	0.754428		0.859199	0.203536	1		1.29965	1.22227	-		1.00718	0.0103219	4.88119	0.996388
eIF-2alpha	1480	-	1		1.98037	0.0471517	2.02752		0.853937	0.637773	1		1.11561	0.899814	1.34603		0.875965	-0.191055	5.58184	0.790335
rngo	3935	+	1		2.31044	0.235759	2.54619		1.04274	0.515918	1		2.26817	0.830142	0.827567		1.17682	0.234896	3.88499	0.750189
CG9947	2134	-	1		0.660124	0.0471517	0.707276		0.56585	0.142591	1		1.34396	0.842219	1.33962		0.613222	-0.705518	4.54988	0.322136
hang	14637	+	7.69169		8.08338	0.345779	8.42916		1.13271	0.799081	1		1.22971	0.656984	0.916915		1.13597	0.183922	5.61558	0.813491
Anxb11	4981	-	1		12.9357	0.849881	13.7856		0.760401	0.212217	1		1.94989	0.918784	1.60616		0.875646	-0.191581	6.93697	0.820464
Traf-like	2517	+	1		0.707276	9.76041	10.4677		-	-	-		-	-	0.936022		0.47381	-1.07762	-0.566795	0.774459
CG4301	8709	+	1		0.301547	0	0.301547		0.187347	0.149691	1		-	0.962535	1.45269		0.242967	-2.04117	-0.227437	0.251671
CG9981	3583	-	1		0	0.141455	0.141455		-	-	-		-	0.962535	-		0.491319	-1.02527	-0.727956	1
mei-41	7808	+	1		3.86644	0	3.86644		2.44876	1.57619	1		1.26642	0.506598	1.12711		2.72323	1.44532	1.81661	0.139633
TH1	2591	-	1		2.49904	0.612973	3.11201		0.997148	0.30592	1		1.45877	0.739227	1.16862		1.1108	0.151597	5.30738	0.834803
CG4239	3389	+	1		2.45189	0.188607	2.6405		0.834903	0.222457	1		1.74887	0.755138	0.647312		0.890979	-0.166537	4.80722	0.824026
CG9992	2953	-	1		1.55601	0.0943035	1.65031		1.40193	1.1087	1		1.69393	0.905916	1.56235		0.846172	-0.240976	4.37425	0.789322
Fur2	8696	+	1		27.017	0.141455	27.1584		1.11263	0.907884	0		3.33327	0.817957	1.07165		1.28847	0.365662	4.4178	0.620481
nonA	10015	+	2.34745		19.0572	0.471517	19.5287		0.960801	0.22361	1		1.54318	0.741271	0.846732		0.919466	-0.121131	6.27699	0.892424
Gpi1	1993	+	1		2.54619	0.0471517	2.59335		1.20128	0.39342	1		2.28528	0.974876	2.06177		1.19865	0.261405	3.72186	0.732591
U2af50	2344	-	1		3.25347	0.0471517	3.30062		0.717371	0.104525	1		0.968657	0.806508	1.11575		0.847351	-0.238968	6.70073	0.744091
sl	6179	+	1		36.5426	4.29081	40.8334		0.994855	0.547052	1		1.72665	0.770028	1.13304		0.959105	-0.0602396	3.63619	0.946335
Dsp1	6832	+	1		114.989	0.0507317	115.039		0.921579	0.21963	1		1.62689	0.756455	0.977913		0.863743	-0.211326	6.35663	0.80098
CG9921	1028	-	1		0.990186	0.0471517	1.03734		0.816268	0.261241	1		1.23292	0.863814	1.04086		1.08382	0.116124	5.77526	0.898995
CG9919	2304	-	1		0.0471517	2.8291	2.87626		0.459807	0.746438	0		1.20612	0.721902	-		0.539732	-0.889686	0.371952	0.533391
CalpC	2757	+	1		11.3175	0.0550104	11.3725		1.00481	0.333304	1		1.27035	0.874791	0.89856		1.13487	0.182526	4.77602	0.784291
CG32579	1833	+	1		1.4617	0.330062	1.79177		0.736018	0.297969	1		1.40435	0.705859	1.16192		0.711955	-0.490142	5.07069	0.501799
CG9917	1827	-	1		7.59143	0.0471517	7.63858		0.642473	0.132852	1		1.47208	0.823472	0.911975		0.612351	-0.707568	5.85465	0.403341
Cyp1	2740	-	1		10.4252	1.19058	11.6158		0.909099	0.0953008	1		1.20781	1.03143	1.10754		1.10896	0.14921	10.1768	0.869736
CG13957	3609	+	1		1.3674	0.0471517	1.41455		1.60749	1.15146	1		0.994134	1.04058	2.67177		1.7808	0.832524	1.96502	0.377933
CG9915	3040	-	1		1.03734	0	1.03734		2.95696	2.81242	0		1.3622	0.67537	0.883412		2.07313	1.05181	2.19801	0.261325
CG9914	1472	-	1		0	0.377214	0.377214		-	-	-		-	-	-		0.166327	-2.5879	-0.933127	0.29359
CG3679	3011	+	1		0.471517	0	0.471517		2.9912	1.55761	1		3.90344	1.19171	2.32473		3.01144	1.59045	3.09203	0.0706479
CG3632	6614	+	1		5.5639	0	5.5639		1.30027	1.34809	0		3.9338	0.996912	1.39665		1.39614	0.481446	2.9751	0.628772
CG9911	3866	-	1		1.50886	0.0471517	1.55601		0.639629	0.164122	1		1.86754	1.00349	1.48078		0.730288	-0.453463	4.58667	0.489603
caz	4675	+	1		3.96075	0.188607	4.14935		0.774923	0.338293	1		1.40156	0.693235	1.08829		0.79609	-0.328997	8.43673	0.707792
CG3560	701	+	1		1.93322	0.0943035	2.02752		0.884622	0.142222	1		0.868706	0.970425	1.35086		1.16101	0.215386	7.43263	0.819861
CG32576	2569	-	1		1.41455	1.98037	3.39492		0.838271	0.326545	1		1.20995	1.00393	1.47949		1.11195	0.153087	6.10111	0.866505
eas	7292	+	0.667147		9.5718	0.0943035	9.66611		1.41172	0.971509	1		2.50873	0.849296	0.816089		1.00967	0.013888	3.36636	1
Pros28.1	1316	+	1		2.54619	0.612973	3.15917		0.827073	0.19734	1		0.913107	1.00745	1.13445		1.12267	0.166933	8.48014	0.845142
Mfe2	2852	+	1		1.03734	0.0943035	1.13164		0.94788	0.288681	1		0.899478	1.09425	1.2903		0.994921	-0.00734677	4.08154	1
kat80	9176	-	1		5.76194	4.4912	10.2531		1.08312	0.868543	0		1.95223	0.873686	1.26483		1.14274	0.192494	2.91588	0.867747
CG12507	1115	-	1		0.188607	0.28291	0.471517		-	-	-		-	-	0		1.95442	0.966738	-0.79835	0.850312
disco	6137	-	1		0	1.98037	1.98037		0.826275	0.915179	0		2.09061	0.561479	0.419355		0.499314	-1.00198	1.08209	0.341301
disco-r	30162	-	1		0.0707276	14.4931	14.5639		0.815182	0.424985	1		1.46521	0.654223	0.783283		0.956818	-0.0636832	3.73928	0.959609
CG42353	11843	-	1		17.3558	5.15954	22.5153		0.912653	0.218467	1		1.98493	0.88109	1.16662		0.90025	-0.151602	4.23962	0.850719
CG42354	11856	-	1		17.3558	5.15954	22.5153		0.905929	0.226695	1		2.0125	0.853635	1.182		0.8942	-0.16133	4.27157	0.839829
CG8958	2527	+	1		3.67784	0.188607	3.86644		-	-	-		-	0	-		0.348956	-1.51888	-0.90026	0.214018
Tob	12323	-	1		0.772919	16.564	17.3369		1.70183	0.525226	1		1.20612	0.875032	1.63495		1.47013	0.55594	1.88478	0.553878
Nipsnap	3204	-	1		2.59335	0.330062	2.92341		0.812042	0.236345	1		2.30525	0.810955	1.23596		0.931882	-0.101781	6.80314	0.915621
dpr18	6564	+	1		6.93131	13.7447	20.676		-	-	-		0	0.240634	-		0.693858	-0.527289	-0.15556	1
CG12395	954	-	1		4.85663	0.0471517	4.90378		-	-	-		-	0	2.19409		1.26141	0.335033	-1.11231	1
Muc14A	52548	+	0.273156		0.102162	89.364	89.4661		0.595011	0.499347	0		-	-	0.773368		0.66482	-0.588963	3.09195	0.658941
CG12698	2577	+	1		0	14.617	14.617		-	-	-		-	0	-		0.369491	-1.43639	-1.28275	1
vap	5711	-	1		26.1221	0.188607	26.3107		0.700204	0.263001	1		1.1302	0.651092	1.30398		0.613443	-0.705	5.90268	0.386195
CG8939	2663	+	1		0.754428	0.0943035	0.848731		1.76793	1.52851	0		1.69546	0.692215	0.800455		1.99343	0.995254	3.46592	0.230676
exd	3518	+	1		41.2106	0.188607	41.3992		0.912674	0.276584	1		1.64991	0.875147	1.0956		0.845706	-0.241771	6.55681	0.780588
eIF5	4830	-	1		20.4159	0.0330062	20.4489		0.834861	0.0416169	1		1.85893	0.826867	0.996791		0.740208	-0.433998	7.74373	0.700492
CG9172	958	-	1		1.41455	0	1.41455		0.954216	0.0729931	1		1.06179	0.745692	1.06162		1.25076	0.322806	8.71709	0.752502
CG8931	1632	+	1		0.518669	0	0.518669		0.788657	0.492274	1		1.40348	0.891761	1.31792		0.727846	-0.458296	3.44881	0.548866
CG9170	4839	-	1		2.49904	0	2.49904		1.03576	0.569409	1		1.99351	0.60915	0.873351		1.32069	0.401292	4.28106	0.622889
CG42766	741	+	1		0.0943035	0	0.0943035		0.840392	1.08133	0		-	2.24592	-		0.681108	-0.554045	1.24131	0.640483
Or13a	2282	+	1		0	0	0		0.379484	0.552762	0		-	1.92507	0.607796		0.412324	-1.27815	0.543121	0.316681
mmd	26045	-	1		0.293869	0.444012	0.737881		0.534842	0.514299	0		-	0.882324	2.15553		0.666993	-0.584256	0.392664	0.664447
CG8928	879	+	1		2.07468	0.235759	2.31044		0.915192	0.196636	1		2.08687	0.741694	1.19267		1.1317	0.178493	5.27429	0.80241
CG8924	3371	+	1		4.43226	0	4.43226		0.673605	0.277685	1		2.0952	0.810669	1.08589		0.711069	-0.491939	4.80888	0.551121
Stim	6016	-	1		6.56492	0.792261	7.35719		0.67665	0.281685	1		4.12273	0.746251	1.04913		0.741165	-0.432133	6.44186	0.62232
Ranbp16	6490	-	1		8.1101	0	8.1101		0.922476	0.345558	1		1.42752	0.806551	1.4306		0.803728	-0.31522	5.0539	0.705261
Lcch3	3474	+	1		0	0.966611	0.966611		-	-	-		-	-	-		1.07204	0.100365	-0.670019	1
CG8916	2604	+	1		0.117879	0	0.117879		-	-	-		-	-	-		1	5.13e-15	-1.36554	1
CG8909	8872	+	1		0.0943035	0.188607	0.28291		-	-	-		-	0	-		0.0708272	-3.81955	-0.89656	0.211613
CycD	2854	-	1		5.42245	0.141455	5.5639		1.18152	0.883799	1		2.0141	0.715339	1.17374		0.865486	-0.208418	4.75001	0.793769
shi	14137	+	1		49.2011	2.94436	52.1454		0.879563	0.429431	1		2.42505	0.771688	1.20427		1.01249	0.0179108	5.33961	0.987033
CG15916	949	+	1		0.518669	0	0.518669		0.875917	0.310503	1		1.45856	0.911876	0.763257		0.874044	-0.194223	4.3569	0.801094
MSBP	2550	-	1		3.39492	0.0471517	3.44208		0.662614	0.182794	1		1.6552	0.923095	0.979633		0.655625	-0.609056	6.81596	0.462717
tay	10604	-	1		7.02561	0.0943035	7.11991		1.10179	0.592993	1		2.06763	0.66959	1.07999		1.24663	0.318033	5.58216	0.714651
CG16952	5355	+	0.667147		5.49318	0.0471517	5.54033		0.86538	0.15297	1		1.79982	0.816449	1.26755		0.858245	-0.220538	5.61821	0.788697
Gapdh2	1517	+	1		11.953	0.141455	12.0944		0.716813	0.129559	1		0.976972	0.882216	0.928184		1.05942	0.0832695	10.5312	0.934782
Gbeta13F	2761	+	1		4.38511	1.79177	6.17688		1.07877	0.489003	1		1.87618	0.720652	1.00231		0.937021	-0.0938473	6.45922	0.924507
AlkB	1354	-	1		1.7564	0.0471517	1.80355		1.0408	0.307074	1		1.44124	0.858693	1.36759		1.21799	0.2845	5.62778	0.672804
Myb	2990	-	1		5.89397	0.424366	6.31833		1.52651	0.977967	1		3.21208	0.829145	1.12474		1.86554	0.899597	5.50738	0.26976
CG15914	1550	+	1		1.55601	1.74461	3.30062		1.04731	0.338018	1		1.746	0.873412	0.648984		0.788142	-0.343473	3.02556	0.740624
UBL3	3238	-	1		3.04325	0.707276	3.75053		1.17814	0.549338	1		2.1671	0.740574	0.920806		0.972562	-0.0401381	5.35458	0.964974
sun	1820	-	1		1.83892	0.707276	2.54619		1.29789	0.687803	1		1.00092	1.10562	1.12914		1.28073	0.356971	9.38202	0.730195
CG8578	3131	+	1		1.22595	0.707276	1.93322		1.13134	0.359052	1		2.17832	1.13239	1.94571		1.1397	0.188656	4.24718	0.814941
Aats-arg	2374	-	1		0	0	0		-	-	-		-	-	-		1	5.13e-15	-1.36554	1
CG8565	3231	+	1		0.0471517	0	0.0471517		-	-	-		-	0.534742	0.516667		0.574229	-0.800303	-0.586233	0.530501
CG32582	1323	+	1		0.730852	0.0707276	0.80158		0.955007	0.501834	1		0.422142	0.780434	-		1.00195	0.00281154	5.09641	1
Chc	7489	-	1		21.2722	2.09825	23.3704		1.86427	1.80298	0		2.0086	0.782911	1.28421		1.78624	0.83693	6.66763	0.265435
CG8509	1393	+	1		0.330062	0.0471517	0.377214		-	-	-		-	0	0.914877		0.393991	-1.34376	-0.390885	0.611514
sd	21351	+	2.88923		21.234	0.708848	21.9428		0.919105	0.640808	1		2.07935	0.783392	1.05664		1.10734	0.147092	6.54355	0.854839
PGRP-LE	2614	-	1		0.565821	0.0943035	0.660124		0.828025	0.126185	1		1.61741	0.816063	0.82645		0.864798	-0.209565	5.59333	0.812009
CG15602	1367	+	1		0.80158	0.0943035	0.895883		1.0323	0.347255	1		1.94871	0.945449	1.4609		0.847624	-0.238504	3.53221	0.809429
CG32581	2254	-	1		3.22989	0.28291	3.5128		0.993481	0.528491	1		3.99953	0.929722	1.22861		0.935213	-0.0966326	5.03001	0.908821
CG8974	2331	-	1		4.07863	0.0943035	4.17293		0.904676	0.553755	1		3.9711	0.838295	1.14928		0.885816	-0.174922	5.59953	0.822086
Rhp	4855	+	1		0.377214	0.471517	0.848731		-	-	-		2.53285	0.770028	1.5634		1.41555	0.501366	2.38044	0.68407
mRpS30	1987	+	1		1.65031	0	1.65031		1.61948	0.924784	1		1.34501	0.977046	1.04854		1.49503	0.580175	4.32755	0.423191
Paf-AHalpha	1571	-	1		2.7348	0	2.7348		0.680653	0.228138	1		2.43543	0.801926	0.754301		0.706846	-0.500532	6.13339	0.580247
CG8959	3313	-	1		0.518669	0	0.518669		0.6865	0.179768	1		0.710514	0.42987	0.913411		0.623304	-0.681993	4.84837	0.402587
CG33173	6892	+	1		1.03734	0	1.03734		1.08141	0.662194	1		4.1008	1.08541	1.94246		1.28695	0.363958	2.8865	0.663382
CG33172	3322	+	1		1.4617	0	1.4617		1.45578	0.482384	1		2.10969	1.38784	1.31208		1.40334	0.488864	4.71278	0.518319
CG8952	976	-	1		0	0	0		-	-	-		0	0.962535	-		1.15599	0.209124	-1.1699	1
CG17209	6515	+	1		1.32025	0.0471517	1.3674		1.19775	0.973593	0		1.07397	0.731157	1.00599		0.855069	-0.225887	2.8257	0.823992
mRpL3	1404	+	1		0.471517	0	0.471517		0.562053	0.169298	1		0.806282	0.802944	0.897898		0.62201	-0.68499	4.99421	0.347766
CG8260	1400	+	1		0.0943035	0.0471517	0.141455		-	-	-		0	0.962535	-		0.350587	-1.51215	0.013362	0.390001
Graf	9035	-	1		16.2988	3.93717	20.236		0.881444	0.272968	1		1.63355	0.739339	1.01107		0.987716	-0.0178322	5.62823	0.982102
CG8239	2046	+	1		0.943035	0	0.943035		0.659596	0.620412	0		1.21552	1.04165	1.15513		0.500264	-0.999237	3.30957	0.340697
Tcp-1zeta	2348	+	1.8961		48.5663	0.188607	48.7549		1.12753	0.739819	1		1.21398	1.03059	1.30146		1.05612	0.0787673	7.91671	0.916466
CG8944	4873	-	1		6.03542	0	6.03542		1.33274	0.375403	1		1.45719	0.738185	1.06011		1.43422	0.520266	4.25145	0.54044
CG8206	997	+	1		1.4617	0	1.4617		0.724835	0.210553	1		1.23833	0.891237	0.846865		0.781392	-0.355881	4.8202	0.631598
CG11679	1419	-	1		0.377214	0	0.377214		0.723719	0.0600163	1		0.872039	1.10083	1.69129		0.900937	-0.150502	5.40593	0.829508
Actr13E	1304	-	1		0.943035	0.141455	1.08449		0.813564	0.0991686	1		1.02913	0.942418	1.5474		0.94964	-0.0745479	6.50139	0.922234
l(1)G0136	1502	+	1		0.707276	0.0471517	0.754428		0.737084	0.171521	1		0.847769	1.12775	1.05662		0.844841	-0.243249	6.10591	0.752916
CG12379	725	-	1		0.28291	0.447941	0.730852		0.928021	0.442209	1		1.33731	1.03658	0.834194		1.00337	0.00485581	3.7152	1
CG8191	1482	+	1		0.589397	0.188607	0.778004		0.74565	0.407634	1		2.12772	1.10473	1.03437		0.778266	-0.361665	2.82937	0.678923
CG8184	17374	+	2.83122		14.0512	0.188607	14.2398		1.31789	1.25866	0		1.71521	0.685535	0.946845		1.20643	0.270746	6.04208	0.720553
CG15601	1092	+	1		0.330062	0.0943035	0.424366		0.850338	0.194786	1		1.38215	0.572318	0.38414		0.914079	-0.129609	3.39982	0.900526
CG9281	4793	-	0.500541		52.527	22.3971	74.9241		1.085	0.863668	1		1.51578	0.820547	0.982582		0.776163	-0.365569	6.99481	0.682943
CG8134	1607	+	1		2.16898	0	2.16898		0.697362	0.246323	1		1.11602	0.65877	1.07456		0.761963	-0.392208	5.18876	0.595962
Pis	2315	-	1		44.1812	0.188607	44.3698		0.619154	0.0895574	1		1.40427	0.66326	1.08911		0.72564	-0.462674	5.55589	0.475433
CG9240	1206	-	1		2.59335	0.0471517	2.6405		0.827811	0.169397	1		1.25079	1.11968	1.05662		0.996271	-0.00539009	7.67848	0.995769
CG8128	2530	+	1		0.28291	0.0157172	0.298628		1.24636	0.264323	1		1.62654	1.01456	0.89912		1.52383	0.607702	2.69939	0.452447
CG43132	347	+	1		0	0	0		-	-	-		0	-	-		0.248438	-2.00904	-1.20491	1
CG15599	3715	-	1		0	0.00530457	0.00530457		-	-	-		0	0	-		1.4068	0.492421	0.013417	0.793743
CG12708	2237	+	1		0	0	0		-	-	-		3.85958	0.64169	-		1.47455	0.560277	-0.389548	0.840364
CG15646	1233	-	1		0	0	0		-	-	-		0	-	-		0.35171	-1.50754	-1.04545	0.564781
CG8119	735	+	1		0	0	0		-	-	-		-	-	-		1	5.13e-15	-1.36554	1
CR43299	3419	-	1		0	0	0		-	-	-		-	-	-		1	5.13e-15	-1.36554	1
CG8117	770	+	1		0	0	0		-	-	-		-	-	-		0.972837	-0.03973	-0.987481	1
sog	21971	-	1		0.117521	0.246725	0.364246		0.443741	0.315347	1		0.643263	0.286713	0.361214		0.661452	-0.596292	2.73237	0.571797
CG8105	1634	+	1		0	0.235759	0.235759		-	-	-		0.964895	0.962535	2.38871		0.672124	-0.5732	-0.0814952	0.876294
CG9220	4935	-	1		3.81929	0.0565821	3.87587		0.891587	0.848608	0		1.80283	0.728648	0.86305		0.745872	-0.423	3.58376	0.675464
CG8097	1865	+	1		1.50886	0.565821	2.07468		0.970657	0.327848	1		0.926299	1.02892	1.4799		1.0774	0.107549	2.60584	0.91461
CG9215	1943	-	1		2.16898	0	2.16898		1.5331	1.34798	0		0.919258	0.785047	1.15203		1.09456	0.130354	2.60755	0.907762
CG7872	1774	+	1		6.08257	0.188607	6.27118		0.971831	0.400496	1		0.949332	0.901744	1.15533		0.974641	-0.0370569	5.50746	0.959198
cerv	1000	-	1		1.4617	0	1.4617		1.31831	0.440988	1		1.74724	0.884642	1.67551		1.24933	0.321158	4.52295	0.659232
CG42299	737	-	1		0	0	0		-	-	-		-	-	-		1	5.13e-15	-1.36554	1
CG9213	2516	-	1		0.943035	0.0471517	0.990186		3.06741	3.65628	0		1.2553	0.582869	1.23486		1.78464	0.835631	2.44305	0.356033
CG15643	1725	-	1		0.28291	0	0.28291		1.62857	0.715734	1		0.78946	0.577521	1.18763		1.40016	0.485591	1.7358	0.570603
CG7860	1449	+	1		0	0	0		0.622426	0.40671	1		0.781105	1.12296	-		1.16192	0.216507	4.46716	0.848634
CG42300	649	-	1		0	0	0		-	-	-		-	-	-		1	5.13e-15	-1.36554	1
Ac13E	11288	-	1.11717		19.6836	1.60316	21.2868		0.94761	0.359507	1		1.77791	0.984483	1.34209		1.08212	0.113866	5.6499	0.870155
Gmap	23868	+	1		97.5711	8.59908	106.17		0.746148	0.542385	1		1.05035	0.550349	0.785719		0.648635	-0.624522	7.22881	0.416945
CG6340	4243	+	1		3.46565	0.141455	3.60711		0.8765	0.142227	1		1.15023	0.770028	0.887394		1.03156	0.0448271	6.62004	0.951363
CG6324	3076	+	1		0	0.165031	0.165031		-	-	-		-	0	-		0.701575	-0.511331	-0.920755	1
CG9203	2484	-	1		0.707276	0.0943035	0.80158		1.88595	1.29599	1		1.70712	0.848781	0.902265		2.09867	1.06947	2.58341	0.250451
CG6308	696	+	1		0.235759	0	0.235759		1.05472	0.333743	1		1.38704	1.37505	-		1.49631	0.581405	6.32924	0.587707
Grip128	3804	-	1		1.13164	0.0471517	1.17879		1.2704	1.0876	0		1.37563	0.789188	1.26065		1.12602	0.171231	2.6105	0.862338
CG15641	413	+	1		0	0.141455	0.141455		-	-	-		-	0.962535	-		0.164265	-2.6059	-1.18615	0.580772
CG15642	1346	-	1		1.3674	1.13164	2.49904		0.965754	1.39078	0		1.11725	1.3063	1.49516		0.595436	-0.747983	1.46257	0.464017
CG6294	4100	+	1		4.1022	0.990186	5.09239		0.964601	0.386877	1		0.823646	0.811454	0.985556		1.00196	0.00283135	5.5387	0.997507
CG6299	4101	+	1		4.1022	0.990186	5.09239		0.966279	0.387924	1		0.81368	0.810174	0.995296		1.00535	0.0076968	5.54881	0.995033
shtd	6797	-	1		3.06486	0	3.06486		1.31347	0.798373	1		1.56334	1.01368	1.32814		1.33271	0.414368	4.16644	0.534727
CG11655	2071	+	1		0.141455	0.0471517	0.188607		0.702106	0.264173	1		2.31575	1.05879	0.449785		0.910261	-0.135648	4.7158	0.870915
Ahcy13	2387	+	1		2.49904	0.0943035	2.59335		1.0634	0.599343	1		0.935948	0.870697	1.11496		0.971639	-0.0415071	7.58219	0.973441
Scamp	3711	-	1		7.96864	0.0471517	8.0158		0.770328	0.135732	1		2.57305	0.7589	0.914111		0.844778	-0.243356	8.22502	0.822852
cngl	54298	-	1		5.90009	1.73308	7.63317		-	-	-		0.723671	0	2.0945		0.744449	-0.425755	3.69239	0.781256
CG9164	4768	-	1		15.395	0	15.395		0.540714	0.156549	1		0.562855	0.379423	0.505232		0.510507	-0.969998	5.75897	0.248064
Pp1-13C	1961	-	1		0.0471517	0.0471517	0.0943035		-	-	-		0	-	0		1.12006	0.163571	-0.923701	1
acj6	27173	-	1		0.339789	4.9053	5.24509		-	-	-		-	-	-		0.944813	-0.081899	2.31353	0.972891
CG6227	4903	+	1		3.44208	0	3.44208		0.982845	0.0897668	1		0.964895	0.842821	1.00775		1.12604	0.171258	5.10132	0.798344
CG12608	1765	-	1		0.589397	0	0.589397		0.87817	0.310209	1		1.43731	0.760741	0.844402		0.806653	-0.309981	5.71769	0.731472
CG9123	1739	-	1		1.01376	0.0471517	1.06091		0.891755	0.193241	1		1.33809	0.620625	0.950988		0.820816	-0.284869	5.26065	0.795354
HDAC6	7051	+	1		0.895883	0.165031	1.06091		0.758484	0.213822	1		1.27759	1.00689	1.17285		0.855247	-0.225588	4.76294	0.739328
CG9114	2218	-	1		1.17879	0.754428	1.93322		0.86115	0.266284	1		0.986824	0.966209	1.14816		0.902007	-0.14879	4.29332	0.845889
dah	2657	+	1		1.13164	0.612973	1.74461		1.74518	1.60729	0		1.30856	1.10692	0.920584		1.16016	0.21432	2.88376	0.805717
Top1	8538	+	1		22.0992	0.099556	22.1987		1.43609	1.44139	0		2.65708	0.773201	1.03741		1.26143	0.335058	6.00169	0.663465
gce	18969	+	1		0.55291	0.191089	0.743999		1.29569	0.909563	1		2.17101	0.632523	0.89701		1.30922	0.388709	2.71604	0.715732
CG5877	3771	+	1		1.13164	0	1.13164		-	-	-		4.27311	0.941381	0.845687		1.59466	0.673253	3.15922	0.529683
CG9106	1370	-	1		0	0	0		-	-	-		-	-	-		1.05798	0.0813058	-0.986814	1
PPYR1	1062	-	1		0.0471517	0	0.0471517		-	-	-		-	-	-		1	5.13e-15	-1.36554	1
CG9101	1132	-	1		0	0	0		-	-	-		-	-	-		0.302472	-1.72512	-0.668642	0.451587
CG43076	842	-	1		0	0	0		-	-	-		-	-	-		1	5.13e-15	-1.36554	1
CG43075	674	-	1		0.0471517	0	0.0471517		-	-	-		-	-	-		0.206417	-2.27637	-1.26383	1
CG5662	983	+	1		0	0	0		-	-	-		-	0	-		1	5.13e-15	-1.36554	1
CG32588	826	-	1		0.0471517	0	0.0471517		-	-	-		-	-	-		1	5.13e-15	-1.36554	1
CG15029	3853	+	1		0	0	0		-	-	-		-	0.481268	-		4.7899	2.25999	-1.26422	1
CG15028	5987	+	1		0	0.0130623	0.0130623		-	-	-		-	-	0		0.947185	-0.0782822	1.31538	0.97876
CG9095	23294	-	1		3.2705	4.05729	7.32779		-	-	-		-	0.481268	-		1.27795	0.353834	1.1249	0.833555
RpL37a	1066	-	1.40251		6.22403	0.0471517	6.27118		0.837605	0.18101	1		0.997427	0.911163	1.28028		1.12952	0.175709	12.4724	0.856666
drd	11557	+	1		1.13737	0.306486	1.44385		-	-	-		1.60816	0.412515	0.686535		0.489753	-1.02987	0.940241	0.439265
Cyp4s3	3238	-	1		0.0471517	0	0.0471517		-	-	-		-	0.962535	0.726344		0.163065	-2.61648	-0.781784	0.171746
CG9072	585	-	1		0	0	0		-	-	-		-	-	-		1	5.13e-15	-1.36554	1
rab3-GEF	24063	+	1		0.124481	0.1582	0.282681		0.546749	0.384489	1		-	0	-		0.292908	-1.77148	0.313384	0.206893
CG5599	2494	+	1		2.12183	0	2.12183		1.08729	0.57438	1		1.35962	1.23755	1.23594		1.32187	0.402578	2.36935	0.659333
CG15027	647	-	1		0.28291	0.0471517	0.330062		5.39383	8.84343	0		0.876478	0.946221	4.35501		1.0818	0.113427	4.38584	0.892347
CG9065	635	-	1		0.330062	0	0.330062		0.820965	0.224739	1		0.933769	1.13239	1.25614		0.98553	-0.0210285	6.61212	0.984692
CG33178	953	+	1		0	0.188607	0.188607		-	-	-		-	0	-		1	5.13e-15	-1.36554	1
CG33177	645	+	1		0	0.0943035	0.0943035		-	-	-		-	-	-		1.50373	0.588548	-1.13534	1
Lsd-2	4748	-	1		19.1436	0	19.1436		1.5691	1.42647	0		3.27867	0.845802	1.12879		1.91093	0.934276	4.86572	0.26085
dob	2089	+	1		0.660124	0	0.660124		0.684459	0.105534	1		1.68025	0.90312	0.998768		0.717439	-0.479071	4.94925	0.536725
CG9053	937	-	1		0.330062	0.0471517	0.377214		0.751458	0.108321	1		1.32207	0.725604	0.764286		0.810377	-0.303335	6.65075	0.702541
CG5548	653	+	1		0.848731	0	0.848731		0.978176	0.218294	1		0.853769	0.972775	1.86452		1.33897	0.421124	8.49538	0.680509
CG5541	7393	+	1		6.3812	1.02132	7.40252		0.824523	0.222828	1		1.09305	0.681899	0.924654		0.810314	-0.303447	5.24596	0.693703
be	17627	+	1		19.2554	158.437	177.693		0.776615	0.37288	1		3.95147	0.965409	1.1935		0.849978	-0.234503	4.47072	0.79416
hiw	52722	-	1		160.74	36.0751	196.815		1.79558	1.85893	0		3.85958	1.33274	1.212		1.43541	0.521462	2.83674	0.562433
CG17707	5426	-	1		0.133597	1.88782	2.02141		-	-	-		-	0.962535	1.56505		1.12147	0.165388	-0.826411	1
eag	49847	+	1		0.77954	0.143701	0.92324		0.323559	0.217803	1		0.241224	0.26251	0.736795		0.44355	-1.17283	2.28491	0.241697
CG9030	900	-	1		0	0	0		-	-	-		-	-	-		1	5.13e-15	-1.36554	1
CG9009	17970	-	1		7.21422	0.0471517	7.26137		0.696875	0.213981	1		1.1455	0.748043	1.08192		0.802892	-0.316722	6.1226	0.673624
CG32591	1499	-	1		0	0.330062	0.330062		0.72648	0.338661	1		1.24058	0.370206	2.78566		1.02132	0.0304326	3.52811	0.983868
CG9503	4238	-	1		10.9628	2.26328	13.2261		0.506764	0.146085	1		1.46196	0.528665	0.642733		0.472537	-1.0815	4.98504	0.167864
Eo	1974	-	1		0.141455	0.660124	0.80158		0.983274	0.648311	1		2.38007	1.40815	1.73449		0.514801	-0.957912	4.63807	0.286509
CG12398	1955	-	1		0.188607	0.518669	0.707276		0.473589	0.0593281	1		0.721644	0.603436	0.763475		0.526605	-0.925208	6.26935	0.208802
CG14406	973	-	1		0.0471517	0.897848	0.944999		0.742741	0.96533	0		0	0.481268	1.58098		0.396235	-1.33557	0.283785	0.359916
CG9509	2731	-	1		0	3.34777	3.34777		0.969886	0.848779	0		0.643263	0.59233	1.01463		0.851782	-0.231444	1.87654	0.862329
CG9512	3590	-	1		0.0235759	1.18665	1.21023		-	-	-		-	0.64169	1.5164		1.53239	0.615783	0.168359	0.694562
CG9514	10937	-	1		0.188607	0.848731	1.03734		-	-	-		0	1.92507	0.129167		0.26996	-1.88918	0.13985	0.244618
CG9517	7216	-	1		1.05306	0.754428	1.80748		-	-	-		-	0	-		0.981481	-0.0269677	0.48733	1
CG9518	8186	-	1		1.41455	14.5463	15.9609		-	-	-		-	-	-		1.42286	0.508795	-0.268367	0.759366
CG9519	2034	-	1		0.0235759	0.919459	0.943035		-	-	-		-	-	-		0.372833	-1.4234	-1.28275	1
CG9521	1866	-	1		2.0511	0.212183	2.26328		0.0139502	0.0162092	0		-	0.26251	0.172222		0.0291992	-5.09793	1.69979	0.00224
CG9522	2329	-	1		0.141455	2.1454	2.28686		-	-	-		-	-	-		0.372846	-1.42335	-1.28275	1
CG12539	2224	-	1		0	1.48528	1.48528		-	-	-		-	-	-		0.0970028	-3.36583	-1.16718	0.445139
Flo-2	94206	+	1		50.7432	20.0102	70.7533		0.785182	0.366494	1		1.47032	0.73284	0.765628		0.714684	-0.484623	4.39567	0.53356
CG32590	870	-	1		0.0943035	0.0943035	0.188607		1.27691	0.314709	1		1.46664	0.962535	1.35538		1.47347	0.559216	3.56793	0.426054
CG14407	727	-	1		0.943035	0	0.943035		0.748226	0.182178	1		0.946428	1.02195	1.07581		1.08497	0.117658	8.09184	0.901093
CG14410	606	+	1		0.0471517	7.68573	7.73288		-	-	-		-	-	-		0.123916	-3.01257	-1.16919	0.345989
CG14411	3625	+	1		3.30062	4.66802	7.96864		1.12584	0.894171	1		1.34711	0.879851	1.08403		1.03762	0.0532747	4.85501	0.946979
CG14408	5000	-	1		1.85463	0.0471517	1.90179		0.764334	0.317214	1		1.3622	0.546304	0.941081		0.881784	-0.181503	3.8663	0.809253
rut	38446	-	1		8.9774	0.203884	9.18128		1.00403	0.604151	1		1.50765	0.864063	1.15088		1.23461	0.30405	2.67217	0.788668
Ag5r	1570	-	1		0.188607	0	0.188607		-	-	-		-	-	-		0.135119	-2.8877	-1.11287	0.570268
Ag5r2	1091	-	1		0	0.0471517	0.0471517		-	-	-		-	-	-		0.368896	-1.43871	-1.28275	1
CG5347	1210	+	1		0	0	0		-	-	-		-	-	1.12913		0.251302	-1.99251	0.991193	0.192798
CG5334	760	+	1		0	0	0		0.152121	0.304241	0		0	0.962535	2.11808		0.409622	-1.28763	1.01541	0.268132
CG15890	8260	-	1		0.00246985	0.0197473	0.0222172		-	-	-		1.92979	0.320845	1.28047		0.39212	-1.35063	0.0992129	0.24743
CG32595	670	-	1		0.424366	0	0.424366		1.16202	0.366522	1		1.04828	0.939059	1.38528		1.36976	0.45392	6.74679	0.613863
CG43088	1298	+	1		0.0471517	4.52657	4.57372		1.90774	2.43816	0		0.562855	0.866282	-		1.17524	0.232957	1.06885	0.899515
NetB	61763	-	1		94.0285	0.598827	94.6273		0.912129	0.911877	0		3.85958	0.481268	0.608565		0.417834	-1.259	2.1782	0.253967
CG5321	1352	+	1		0.0471517	0	0.0471517		-	-	-		0.321632	0.240634	-		1.07131	0.0993769	-0.0100276	1
NetA	49820	-	1		30.2387	12.0237	42.2624		0.591502	0.195953	1		0.855955	0.531549	1.14209		0.661997	-0.595104	5.18342	0.374268
CG9413	17848	-	1		1.33806	0.251778	1.58984		1.39557	0.525139	1		1.07211	0.792676	0.729704		1.27424	0.349631	3.46654	0.646802
nmdyn-D6	940	+	1		1.03734	0	1.03734		0.996246	0.457029	1		1.6162	0.92243	1.41075		1.13629	0.18433	5.7559	0.836387
mRpS25	847	-	1		0.565821	0.188607	0.754428		0.840883	0.234176	1		0.834263	0.846788	1.2627		1.05713	0.0801551	8.16272	0.935332
CG14414	1567	+	1		0.707276	0.141455	0.848731		0.71682	0.176955	1		1.45316	1.00053	1.30541		0.862807	-0.21289	5.41126	0.761839
CG12540	1106	+	1		0.235759	0.0943035	0.330062		0.64771	0.201615	1		-	-	-		0.704301	-0.505736	-0.404577	0.839525
CG9411	7674	-	1		5.17083	0.330062	5.5009		0.843302	0.398902	1		2.64785	0.806466	1.13354		0.990431	-0.0138723	3.8519	0.993428
betaNACtes4	1066	+	1		0.2279	0	0.2279		-	-	-		0.413526	0.673775	-		0.873415	-0.195261	0.0699991	1
betaNACtes3	1021	+	1		0.062869	0.0392931	0.102162		-	-	-		0.933769	0.892533	-		0.746191	-0.422382	0.347414	0.797438
dpr8	140146	+	1		12.8221	5.47998	18.3021		0.60022	0.466351	1		0.964895	0.320845	0		0.790783	-0.338646	5.07938	0.797172
betaNACtes6	1025	-	1		0.062869	0.0392931	0.102162		-	-	-		1.15787	0.892533	-		0.787318	-0.344982	0.301923	0.892294
betaNACtes2	961	-	1		0.0235759	0.0186642	0.0422401		-	-	-		0.482447	-	-		1.20315	0.26682	0.180957	0.893355
CG9400	13785	-	1		0.605114	0.571715	1.17683		-	-	-		-	-	-		0.37278	-1.4236	-1.28275	1
Muc12Ea	10212	+	1		0	0	0		1.70337	2.49346	0		0.482447	0.699202	1.82241		1.09274	0.127957	1.91126	0.9494
na	10808	+	1		0.333689	0	0.333689		1.35944	1.33423	0		1.60816	1.13754	1.17763		0.759853	-0.396209	1.14033	0.687308
CG13404	1514	-	1		0	0.28291	0.28291		-	-	-		0	0	-		2.3869	1.25514	0.504772	0.309103
CG1461	3624	+	1		0.28291	0.0235759	0.306486		-	-	-		0.321632	1.28338	1.94503		0.469246	-1.09158	0.0826411	0.41993
mud	10753	+	1		20.7456	3.77214	24.5178		1.87275	1.83765	0		2.0393	0.833809	0.850889		1.88772	0.916649	5.08592	0.189455
CG32599	2829	+	1		1.13164	0	1.13164		0.506897	0.520625	0		1.54383	0.714139	1.10824		0.220566	-2.18072	5.34393	0.052532
mRNA-cap	2554	-	1		1.50886	0.0943035	1.60316		1.38833	0.261724	1		1.21881	0.84007	1.58636		1.58143	0.661232	4.94074	0.419794
CG1434	2166	+	1		1.03734	0.188607	1.22595		0.802496	0.215263	1		0.861973	0.721902	1.05333		0.931379	-0.10256	5.26017	0.897894
Fbxl4	3518	-	1		1.60316	0	1.60316		0.99277	0.482059	1		0.734345	0.914062	0.893529		0.975057	-0.0364413	3.7567	0.961977
CG42271	5994	-	1		4.95093	1.79358	6.74451		0.828631	0.344339	1		0.86421	0.765653	1.27703		0.921752	-0.11755	4.30064	0.884716
mRpL38	1660	+	1		1.88607	1.4617	3.34777		0.918691	0.514924	1		1.09131	0.914409	1.06089		0.711846	-0.490363	5.80182	0.608361
CG11674	1242	-	1		0.0943035	0.377214	0.471517		-	-	-		-	-	-		0.198826	-2.33042	-1.26352	0.60751
l(1)G0469	6377	-	1		3.54581	7.07276	10.6186		0.534489	0.497735	0		2.70171	0.882324	0.65828		0.721468	-0.470993	2.4144	0.653153
l(1)G0007	23357	+	1		21.9845	9.73474	31.7192		0.967707	0.326042	1		0.999678	0.782233	1.01055		1.1027	0.14104	5.03059	0.825012
CG11590	704	+	1		1.17879	0	1.17879		0.987601	0.170859	1		1.26642	0.969298	1.45097		1.29155	0.369105	7.50883	0.647152
yl	6745	+	1		0	0	0		0.600755	0.249285	1		1.17166	0.68309	1.00322		0.655801	-0.608671	1.82575	0.524355
CG13403	772	-	1		0.0471517	0	0.0471517		0.839638	0.939868	0		1.12571	0.834197	-		0.516294	-0.953735	2.77993	0.258345
CG11585	1240	+	1		0	0	0		-	-	-		-	-	-		1.42762	0.513617	-0.533806	0.904068
CG12481	589	+	1		0	0	0		-	-	-		-	-	-		1	5.13e-15	-1.36554	1
CG32603	1267	+	1		0	0	0		-	-	-		-	-	-		0.696776	-0.521233	-0.382056	0.881276
CG11584	2286	+	1		0	0	0		-	-	-		-	-	-		0.338658	-1.5621	-0.0488036	0.479271
CG11581	1005	+	1		0	0	0		-	-	-		-	-	-		1	5.13e-15	-1.36554	1
CG1368	910	+	1		0	0.00147349	0.00147349		-	-	-		-	-	-		0.198875	-2.33006	-1.26352	0.607419
betaNACtes1	1138	-	1		0	0.00294698	0.00294698		-	-	-		2.02628	1.60131	-		1.14283	0.192613	0.858732	0.928546
CG12480	1951	+	1		0	0	0		-	-	-		-	0	-		0.52078	-0.941253	-1.07416	1
CG12479	428	-	1		0	0	0		-	-	-		-	-	-		1	5.13e-15	-1.36554	1
Ste:CG33236	724	-	1		0	0	0		-	-	-		-	-	-		1	5.13e-15	-1.36554	1
Ste:CG33239	723	-	1		0	0	0		-	-	-		-	-	-		4.77588	2.25577	-1.26422	1
Ste:CG33237	724	-	1		0	0	0		-	-	-		-	-	-		4.77285	2.25485	-1.26422	1
Ste:CG33247	724	-	1		0	0	0		-	-	-		-	-	-		1	5.13e-15	-1.36554	1
Ste:CG33243	1994	-	1		0	0	0		-	-	-		-	-	-		1	5.13e-15	-1.36554	1
Ste:CG33238	726	-	1		0	0	0		-	-	-		-	-	-		1	5.13e-15	-1.36554	1
Ste:CG33239	723	-	1		0	0	0		-	-	-		-	-	-		4.77621	2.25587	-1.26422	1
Ste:CG33241	724	-	1		0	0	0		-	-	-		-	-	-		4.7776	2.25629	-1.26422	1
Ste:CG33242	724	-	1		0	0	0		-	-	-		-	-	-		4.77562	2.25569	-1.26422	1
Ste:CG33237	724	-	1		0	0	0		-	-	-		-	-	-		4.77331	2.25499	-1.26422	1
Ste:CG33244	724	-	1		0	0	0		-	-	-		-	-	-		0.984749	-0.022172	-1.16726	1
Ste:CG33245	724	-	1		0	0	0		-	-	-		-	-	-		0.98473	-0.0222	-1.16726	1
Ste:CG33244	724	-	1		0	0	0		-	-	-		-	-	-		0.984716	-0.0222205	-1.16726	1
Ste:CG33245	724	-	1		0	0	0		-	-	-		-	-	-		0.984715	-0.0222222	-1.16726	1
Ste:CG33240	724	-	1		0	0	0		-	-	-		-	-	-		0.199219	-2.32757	-1.26352	0.606788
Ste:CG33239	723	-	1		0	0	0		-	-	-		-	-	-		4.77582	2.25575	-1.26422	1
Ste:CG33241	724	-	1		0	0	0		-	-	-		-	-	-		4.77793	2.25638	-1.26422	1
Ste:CG33239	724	-	1		0	0	0		-	-	-		-	-	-		4.77606	2.25582	-1.26422	1
Ste:CG33241	725	-	1		0	0	0		-	-	-		-	-	-		4.77708	2.25613	-1.26422	1
Ste:CG33242	725	-	1		0	0	0		-	-	-		-	-	-		4.77668	2.25601	-1.26422	1
Ste:CG33237	725	-	1		0	0	0		-	-	-		-	-	-		4.77437	2.25531	-1.26422	1
Ste:CG33245	725	-	1		0	0	0		-	-	-		-	-	-		0.984708	-0.0222327	-1.16726	1
Ste:CG33244	725	-	1		0	0	0		-	-	-		-	-	-		0.984688	-0.0222617	-1.16726	1
Ste:CG33243	724	-	1		0	0	0		-	-	-		-	-	-		1	5.13e-15	-1.36554	1
Ste:CG33239	723	-	1		0	0	0		-	-	-		-	-	-		4.77651	2.25596	-1.26422	1
Ste:CG33245	724	-	1		0	0	0		-	-	-		-	-	-		0.984685	-0.0222654	-1.16726	1
Ste:CG33244	724	-	1		0	0	0		-	-	-		-	-	-		0.984674	-0.0222825	-1.16726	1
Ste:CG33239	723	-	1		0	0	0		-	-	-		-	-	-		4.77461	2.25538	-1.26422	1
Ste:CG33245	724	-	1		0	0	0		-	-	-		-	-	-		0.98467	-0.022288	-1.16726	1
Ste:CG33244	724	-	1		0	0	0		-	-	-		-	-	-		0.984658	-0.0223058	-1.16726	1
Ste:CG33240	4531	-	1		0	0	0		-	-	-		-	-	-		0.199227	-2.32752	-1.26352	0.606775
Ste:CG33246	724	-	1		0	0	0		-	-	-		-	-	-		1	5.13e-15	-1.36554	1
Ste:CG33237	724	-	1		0	0	0		-	-	-		-	-	-		4.77336	2.255	-1.26422	1
Ste:CG33247	724	-	1		0	0	0		-	-	-		-	-	-		1	5.13e-15	-1.36554	1
Ste12DOR	682	+	1		0	0	0		-	-	-		-	-	-		1	5.13e-15	-1.36554	1
ben	3452	+	1		10.8528	0	10.8528		0.973715	0.217216	1		1.6328	0.882101	1.24244		0.954498	-0.0671854	7.97945	0.932072
CG11068	1324	+	1		0.141455	2.97056	3.11201		-	-	-		-	-	-		0.198824	-2.33043	-1.26352	0.607513
mamo	119993	-	3.91058		407.964	5.09848	413.062		0.950862	0.245597	1		1.28007	0.693173	1.07945		1.0579	0.081199	8.62409	0.9265
CG11071	6277	-	1		33.5013	0.0514383	33.5527		1.04088	0.743287	1		1.36693	0.678904	1.4992		1.01057	0.015174	5.40926	0.991606
CG32626	15121	-	1		8.02051	0.248669	8.26918		1.16771	0.92739	1		2.62623	1.27232	1.42367		1.21209	0.277494	4.29537	0.716178
jub	3985	-	1		4.0079	0.141455	4.14935		0.867344	0.288367	1		1.26399	0.819456	1.26782		0.979906	-0.0292842	5.58601	0.970136
CG11092	3108	+	1		3.48923	0.895883	4.38511		0.909642	0.503574	1		1.8341	0.874542	0.945858		0.937354	-0.0933336	4.91558	0.909558
Clic	8883	-	1		14.3582	1.48135	15.8396		0.831527	0.312606	1		1.7352	0.87132	1.32182		0.827928	-0.272423	6.93388	0.73888
CG11095	1180	+	1		0.80158	0.188607	0.990186		0.99988	0.0600954	1		1.17038	0.744603	0.808978		1.24624	0.317584	5.3052	0.699741
CG10996	1250	-	1		0	0.990186	0.990186		-	-	-		-	-	-		0.145984	-2.77612	-1.11517	0.559443
CG10993	769	-	1		0	0.424366	0.424366		-	-	-		0	0.962535	-		9.85073	3.30023	-0.525494	0.100452
inaE	27745	+	1		41.5171	1.53872	43.0558		0.625773	0.287539	1		2.28716	0.700444	1.26463		0.629496	-0.66773	6.39329	0.381895
CG11103	874	+	1		0.235759	0	0.235759		0.852029	0.0459629	1		2.17101	1.36781	2.72312		1.1235	0.167998	5.992	0.859336
CG10992	2164	-	1		2.59335	0	2.59335		0.612691	0.210982	1		1.34287	0.878268	1.015		0.665281	-0.587965	8.78566	0.449209
rdgB	13973	+	1		6.09208	1.01376	7.10585		0.618574	0.245897	1		0.945203	0.682824	1.07614		0.60959	-0.714088	4.37874	0.289423
Yp3	1623	+	1		0.0471517	0	0.0471517		0.360914	0.220585	1		0.964895	2.40634	0.726344		0.319199	-1.64747	4.67105	0.258535
Rtc1	1422	+	1		0.28291	0.0471517	0.330062		0.727654	0.15498	1		0.936516	1.0132	1.37864		0.807627	-0.308239	5.2815	0.646071
CG32625	653	-	1		0.28291	0	0.28291		0.52549	0.09243	1		0.871216	0.717823	0.710125		0.712906	-0.488217	5.32047	0.584398
CG10990	9812	-	2.20753		52.4956	1.17475	53.6704		0.726082	0.251271	1		1.87804	0.751224	0.871517		0.780489	-0.357549	8.27408	0.672209
CR42861	549	+	1		0	0	0		-	-	-		-	-	-		1	5.13e-15	-1.36554	1
CG11151	1358	+	1		0.754428	0.165031	0.919459		0.841517	0.269633	1		1.1513	0.806974	1.26781		0.995906	-0.00591917	8.50496	0.995526
CG11134	1035	+	1		0	0	0		0.882459	0.192331	1		0.648064	1.18781	0.684409		1.01581	0.0226339	5.49169	0.981312
l(1)dd4	8086	-	1		3.93717	5.76823	9.7054		1.06599	0.496777	1		2.188	0.702514	0.920571		0.974396	-0.0374195	4.66378	0.970676
g	9075	-	1		141.431	0.477947	141.909		1.11737	1.15718	0		1.21007	0.697452	0.626504		1.01171	0.016792	4.44426	0.994223
mus101	4825	+	1		8.1101	0.28291	8.39301		0.995019	0.954801	0		1.07997	0.721902	0.948673		0.827086	-0.273891	3.06401	0.737338
CG9941	3292	-	1		6.34243	0.0471517	6.38958		1.25778	1.24171	0		1.65999	0.952612	1.32218		1.03566	0.0505519	4.74459	0.948854
CG32628	3159	+	1		0.565821	0.612973	1.17879		0.287917	0.349141	0		0.689211	0.385014	1.50134		0.474139	-1.07662	0.186339	0.48402
NnaD	22144	+	1		1.63145	7.98054	9.61199		0.382746	0.252985	1		0.723671	0.577521	4.8043		0.349787	-1.51545	1.90834	0.122985
CG9940	33731	-	1		98.9834	2.83382	101.817		0.94605	0.229997	1		1.38753	0.664884	1.13547		1.0881	0.121814	4.60841	0.862447
CG11158	1709	+	1		0.872307	37.9571	38.8295		0.666188	0.162691	1		0.729555	0.721902	0.652535		0.657297	-0.605382	2.37216	0.52852
CG12177	2498	-	1		2.31044	0.0471517	2.35759		0.320502	0.074205	1		0.569041	0.226479	1.88409		0.37405	-1.4187	3.22661	0.0660474
CG11162	907	+	1		0	0.377214	0.377214		-	-	-		-	-	-		4.87319	2.28487	-1.26404	1
CG15760	4780	+	1		0.0943035	0.330062	0.424366		-	-	-		-	0	-		0.312947	-1.67601	-0.220441	0.341104
CG11164	1273	+	1		0.188607	0	0.188607		0.56363	0.422093	1		0.730191	0.610058	0.601784		0.630902	-0.664511	3.26249	0.455474
Lig4	3225	-	1		0.895883	0.0471517	0.943035		1.13767	0.351131	1		1.31791	0.705859	0.909761		1.07032	0.0980458	2.24136	0.947532
NFAT	38901	+	1		46.9714	0.895457	47.8669		0.794457	0.424315	1		2.10007	0.629847	0.913269		0.939585	-0.0899042	5.08069	0.902555
CG2691	5067	-	1		4.43226	3.11201	7.54428		0.566041	0.128716	1		1.44381	0.718548	0.892751		0.660453	-0.598473	6.94287	0.406516
Tango2	2218	+	1		1.13164	0.141455	1.2731		1.06823	0.580203	1		1.2554	0.751981	1.64615		1.07098	0.0989366	4.15721	0.885575
tth	3162	-	1		10.8921	0.471517	11.3636		0.779657	0.30828	1		1.27534	0.686048	0.961274		1.06002	0.0840932	6.79488	0.927517
BthD	1115	+	1		1.60316	0.612973	2.21613		2.08937	2.39894	0		1.27783	0.750069	0.973477		0.743817	-0.426981	5.04157	0.667529
Ndc80	2310	-	1		1.55601	0.141455	1.69746		1.44932	0.844745	1		1.44116	1.00088	1.08221		1.01128	0.0161801	3.0929	1
CG11178	3850	+	1		2.78195	0.612973	3.39492		1.02597	0.510241	1		1.36057	0.876595	0.925595		1.13424	0.181725	3.56373	0.81283
up	9030	-	1		0.0500987	1.86835	1.91845		0.604249	0.547509	0		-	-	-		1.10809	0.148079	0.154066	0.953739
Tango13	26749	+	1		18.8399	0.14211	18.982		1.12063	0.645183	1		2.86022	0.959884	0.901245		1.26004	0.333467	3.70308	0.684004
CG32633	1686	+	1		0	0	0		-	-	-		0	0	-		0.0546885	-4.19262	-0.939609	0.228452
CG32631	1400	+	1		0	0.0471517	0.0471517		-	-	-		-	0	-		0.248261	-2.01007	-1.20491	1
CG11816	1203	-	1		0	0	0		0.505433	0.468735	0		1.28653	0.240634	1.69982		0.55888	-0.839389	1.4654	0.404438
Cpr12A	1277	+	1		0	0.0471517	0.0471517		-	-	-		-	-	-		0.145755	-2.77838	-0.143531	0.203002
CG15756	1331	+	1		0.0471517	0	0.0471517		-	-	-		-	0	-		0.121517	-3.04077	-0.93343	0.583254
CG15754	1268	+	1		0	0	0		0.910298	0.800852	0		4.82447	0.64169	-		1.21812	0.284656	1.95247	0.839306
CG15753	3059	+	1		0.00594567	0	0.00594567		0.913951	0.798614	0		0.723671	0.349219	0.366711		1.11783	0.160703	1.0135	0.870229
CG34324	1079	-	1		0	0	0		-	-	-		-	-	-		1.16541	0.220834	1.22015	0.918987
CG32635	73725	+	1		0.642002	0.275238	0.91724		0.782366	0.307397	1		1.60816	0.303959	0.729974		0.810501	-0.303115	2.34099	0.765427
Set2	7747	+	1		3.53638	0	3.53638		1.50744	1.83336	0		1.60636	0.863602	0.762314		1.21058	0.275698	3.5042	0.753297
CG1998	3706	-	1		0.848731	0.145385	0.994116		0.533139	0.321437	1		1.34501	0.82543	0.69491		0.635409	-0.654243	4.82287	0.355345
CG1681	4461	+	1		3.84287	3.65426	7.49713		0.591251	0.220473	1		1.31577	0.610179	1.79034		0.46539	-1.10349	6.32951	0.293988
CG12725	1025	-	1		0.28291	0.28291	0.565821		-	-	-		-	-	-		0.491133	-1.02581	-1.06391	1
CG1673	4337	+	1		12.118	0.0943035	12.2123		0.890585	0.27532	1		2.57305	1.4438	1.36434		1.0528	0.0742327	2.56939	0.941265
CG1662	1246	+	1		0.518669	0	0.518669		0.924477	0.100536	1		1.00754	0.888494	0.908065		1.10338	0.14193	4.44992	0.861214
Yippee	1481	-	1		0.943035	0	0.943035		0.879578	0.301382	1		1.24058	0.845865	0.734704		1.08321	0.115308	5.65542	0.889303
Tim9a	684	+	1		1.08449	0	1.08449		0.994469	0.202908	1		1.1457	0.822656	0.667941		1.33145	0.412997	7.68599	0.69416
Rbp1-like	4169	-	1		1.46636	0	1.46636		1.0048	0.421967	1		2.01652	0.471525	0.947525		1.10243	0.140685	5.99648	0.875192
CG1640	9555	+	1		15.0953	0.471517	15.5668		0.580063	0.13189	1		1.45208	0.944939	1.16276		0.646848	-0.628501	6.63899	0.371504
dmrt11E	2134	+	1		0	0.612973	0.612973		-	-	-		-	-	-		0.346498	-1.52908	-0.33146	0.502931
Syt12	8932	+	1		0.115237	3.32633	3.44157		-	-	-		-	0	-		1.22813	0.296462	-0.963435	1
CG15747	2666	+	1		4.95093	0.00673596	4.95767		1.22895	0.791854	1		1.48445	0.673467	0.579315		1.32458	0.405531	4.30278	0.575145
RpS15Aa	1882	-	1		8.36943	0.149314	8.51875		0.949913	0.196628	1		0.854557	0.962061	1.19593		1.32123	0.401883	12.2254	0.706847
Jafrac1	2150	+	1.40251		10.2319	0.424366	10.6563		0.811428	0.238262	1		1.27918	0.852762	0.861139		0.852542	-0.230157	8.64741	0.75484
IP3K2	10666	+	1		4.68374	1.60428	6.28802		0.667078	0.224731	1		1.34359	0.639172	1.38181		0.768802	-0.379315	6.57462	0.623204
CG15745	2501	+	1		0.597255	0	0.597255		1.05541	0.741759	1		1.68579	0.793844	0.862534		0.911421	-0.13381	4.10263	0.891136
CG1622	2812	+	1		2.8291	0	2.8291		0.785407	0.268633	1		0.890464	0.793298	0.964972		0.983165	-0.0244939	8.47402	0.977691
CG1764	2181	-	1		3.21418	0	3.21418		0.806597	0.235811	1		1.07841	0.822166	1.21788		0.949503	-0.0747563	4.33193	0.925693
CG15744	6073	+	1		2.88804	0.141455	3.0295		1.16775	0.858586	1		1.51106	0.728247	1.03691		1.25124	0.323357	4.08986	0.662023
CG15743	1712	+	1		0.471517	0	0.471517		0.730896	0.24325	1		1.10274	0.781728	1.29576		0.859228	-0.218887	7.80614	0.804199
HDAC4	22450	-	1		11.9578	0.109572	12.0673		0.843943	0.461718	1		1.34131	0.714415	0.970238		0.84431	-0.244155	4.93812	0.717278
comt	3492	+	1		1.2731	1.46507	2.73817		1.5255	0.972531	1		1.69559	0.729069	0.997633		1.03224	0.0457727	4.14215	0.961021
CG15742	1083	-	1		0	0	0		-	-	-		-	0	-		0.205982	-2.27941	-1.26383	1
CG32639	642	-	1		0.754428	0	0.754428		-	-	-		-	0	1.01227		0.649531	-0.622529	-1.07998	1
mew	44082	-	1		37.8009	0.381314	38.1822		0.734126	0.381827	1		1.70186	0.798458	1.31399		0.87419	-0.193982	6.39152	0.810358
REG	1649	+	1		10.0905	0.612973	10.7034		0.789074	0.305209	1		1.13297	0.673377	0.914899		0.777861	-0.362416	7.34639	0.630464
sno	16168	-	1		10.3734	0.00392931	10.3773		0.944968	0.716504	1		1.77207	0.77167	0.871186		0.914994	-0.128166	5.14127	0.852188
CG2453	1280	-	1		0.565821	0	0.565821		0.84062	0.248919	1		0.811924	0.94594	0.651241		0.900023	-0.151967	4.59571	0.851591
CG12723	2240	-	1		0.142527	0	0.142527		-	-	-		0	6.57341	1.01093		2.71598	1.44147	-0.919605	0.691497
CG32641	496	+	1		0.153243	0	0.153243		0.941647	0.191113	1		1.48641	1.11914	2.60779		1.11585	0.158148	7.64694	0.832254
CG32640	497	+	1		0.153243	0	0.153243		0.932637	0.19865	1		1.48641	1.13812	2.60779		1.10862	0.148764	7.65028	0.842128
CG34411	27451	-	1		23.8627	1.01208	24.8748		-	-	-		7.39753	3.40589	6.35452		5.97103	2.57798	2.41359	0.020089
CG12096	1994	+	1		1.60316	3.91359	5.51675		0.829928	0.154835	1		1.46038	1.01248	1.22844		0.945129	-0.0814163	4.86506	0.901876
Bap60	2134	-	1		2.12183	0	2.12183		0.858	0.306072	1		0.959696	0.816697	1.16626		0.864885	-0.209419	6.2481	0.780758
CG4332	2333	+	1		5.70536	0.707276	6.41264		0.779453	0.172551	1		1.4062	0.951629	0.986183		0.891231	-0.166128	4.97472	0.805544
CG4318	1464	-	1		0.0943035	0	0.0943035		-	-	-		-	1.13194	-		6.49036	2.6983	-0.466929	0.130465
CG32645	14258	+	1		0.0066259	0.536538	0.543164		-	-	-		0.964895	-	-		1.61467	0.691238	-0.727548	0.865769
CG4330	3028	+	1		2.49904	0	2.49904		0.697022	0.213154	1		1.31013	0.850459	1.13623		0.787354	-0.344916	5.13156	0.690125
CG15717	1272	+	1		0.990186	0	0.990186		0.788824	0.388123	1		1.14676	0.915003	0.703522		0.737075	-0.440117	6.59309	0.660684
CG32638	5919	-	1		2.63153	0.158638	2.79017		0.985297	0.169007	1		1.60816	0.853156	0.855248		1.09637	0.132739	4.73189	0.843523
CG42237	7931	+	1		0.0471517	1.2731	1.32025		-	-	-		-	0	-		0.885129	-0.176041	-1.04394	1
Fer3HCH	813	-	1		0.0943035	0	0.0943035		-	-	-		-	-	4.12984		1	5.13e-15	-1.36554	1
CG43313	16348	-	1		2.09825	0.0943035	2.19256		1.25402	1.48466	0		1.72877	1.05191	1.41636		0.888662	-0.170293	2.18414	0.901398
CG2200	1224	+	1		1.60316	0.895883	2.49904		0.837396	0.064266	1		0.830174	0.88792	0.936022		1.08186	0.113513	7.2732	0.890257
lic	2871	+	1		2.16898	0.612973	2.78195		1.48431	1.19267	0		2.9318	0.959688	1.23667		1.88298	0.913021	4.61833	0.284419
hep	11212	-	1		12.5424	0.0157172	12.5581		0.828972	0.324672	1		2.16521	0.781321	1.13843		0.932905	-0.100199	5.38115	0.878599
CG12715	2213	-	1		0	0	0		-	-	-		-	-	-		1.40579	0.491384	-0.837833	0.739942
CG42629	40135	+	1		0.653409	0.753676	1.40709		0.541545	0.407037	1		0.482447	-	1.77473		0.684451	-0.54698	0.150534	0.75468
CG2209	752	+	1		0	0.0471517	0.0471517		-	-	-		-	-	-		1	5.13e-15	-1.36554	1
CG15719	864	-	1		0	0.0471517	0.0471517		-	-	-		-	-	-		1	5.13e-15	-1.36554	1
RhoGAP1A	12888	+	1		6.39299	0.235759	6.62875		1.06931	0.481527	1		2.32121	0.737094	1.17225		1.32011	0.400661	5.77346	0.657309
CG17636	2512	-	1		0	0	0		-	-	-		-	-	-		0.976688	-0.0340303	-0.938905	1
CR40469	214	+	1		0	0	0		-	-	-		-	-	-		1	5.13e-15	-1.36554	1
rad	46035	+	1		0.09859	0.579488	0.678078		-	-	-		-	0	-		1.55091	0.633114	-0.330221	0.819697
CG32643	649	+	1		0	0	0		-	-	-		-	-	-		0.160574	-2.63869	-1.18584	0.58392
CG12716	1896	-	1		0.0471517	0	0.0471517		-	-	-		-	-	-		1.01433	0.0205301	-0.390276	1
CR43152	791	-	1		0	0	0		-	-	-		-	-	-		1	5.13e-15	-1.36554	1
CG15721	3138	+	1		0	0	0		-	-	-		-	0	-		0.697669	-0.519386	-0.903958	0.709856
CR43636	2738	-	1		0	0	0		-	-	-		-	-	-		1	5.13e-15	-1.36554	1
Mur11Da	2038	+	1		0	0	0		-	-	-		-	2.88761	-		1.26078	0.33432	3.13417	0.841255
CG32642	1339	+	1		0	0	0		-	-	-		-	-	-		1.21293	0.278497	-0.457959	1
CG4395	6132	-	1		0.0471517	0	0.0471517		-	-	-		-	-	-		3.98328	1.99396	-1.20884	1
fne	32254	+	1		227.747	5.49436	233.242		3.25785	3.28847	0		0.689211	0.0641691	-		1.19834	0.261035	2.46468	0.860421
CG4645	1963	+	1		1.50886	0	1.50886		0.829629	0.157458	1		1.20612	0.795943	1.8632		0.973699	-0.0384529	6.59447	0.960287
CG4400	1615	-	1		0.707276	0.0471517	0.754428		0.695698	0.289671	1		0.912191	0.866738	0.685522		0.759083	-0.397671	4.02242	0.546753
mRpL49	739	+	1		1.32025	0.0471517	1.3674		1.01131	0.383578	1		0.759376	0.815924	0.836171		1.26388	0.337865	7.48081	0.767689
CG4404	2291	-	1		4.29081	0.0471517	4.33796		1.01287	0.0847527	1		1.2321	0.752161	1.31689		1.10039	0.138015	5.7128	0.839359
CG4407	2165	-	1		0.754428	0.0471517	0.80158		0.723255	0.294365	1		1.21609	0.912356	1.30193		0.756907	-0.401813	4.20615	0.577422
CG32649	2309	-	1		0.778004	0	0.778004		0.841432	0.259884	1		0.553628	0.753289	0.570086		0.913979	-0.129767	3.39537	0.867993
CG32650	1167	-	1		0.235759	0.471517	0.707276		0.50931	0.480308	0		0	1.4438	-		0.639832	-0.644234	1.22285	0.614878
CG4661	2035	-	1		2.54619	0	2.54619		-	-	-		-	-	2.29531		1.49728	0.582342	-1.04584	1
CG3775	2567	+	1		0	1.22595	1.22595		-	-	-		-	0	-		0.984103	-0.0231191	-1.20688	1
Pde9	105693	-	1		199.062	0.612631	199.675		0.8956	0.542424	1		1.54648	1.26125	1.79173		0.946442	-0.0794136	3.84707	0.911814
CG32647	8387	-	1		0.28291	0.0696049	0.352515		-	-	-		-	0.962536	-		0.875472	-0.191868	0.0950957	0.947606
CG3812	5716	+	1		0.0471517	0.175696	0.222848		-	-	-		-	-	0.516667		0.710476	-0.493143	-0.263639	0.850472
CG12717	2728	-	1		1.87428	0.117879	1.99216		1.33224	1.71056	0		2.41535	1.12901	1.1886		1.93408	0.951646	3.5362	0.359493
ade5	2859	-	1		3.96075	0.0471517	4.0079		0.911056	0.315526	1		1.13201	0.882174	0.7997		0.978655	-0.0311272	5.6224	0.96671
CG4004	5320	+	1		1.63852	0.565821	2.20434		0.819725	0.279799	1		2.70171	0.974955	1.06225		0.750546	-0.413987	5.86003	0.692056
CG15725	2373	+	1		0.00336798	6.718	6.72137		-	-	-		-	-	-		0.749826	-0.415372	-0.107798	0.832733
Smr	56445	-	4.04142		153.935	2.43649	156.372		0.849935	0.351463	1		1.37191	0.73192	0.987338		0.88147	-0.182017	7.08632	0.815679
CR33963	1171	+	1		0	0	0		-	-	-		-	-	-		1	5.13e-15	-1.36554	1
Tis11	20342	+	1		61.3601	2.51083	63.871		0.661338	0.0933606	1		2.49996	0.646515	0.969377		0.796699	-0.327893	4.96779	0.68245
CkIalpha	4052	+	1		8.22798	0.487235	8.71521		0.815985	0.319552	1		1.50524	0.800264	1.28612		0.962429	-0.0552484	6.98028	0.946526
tomosyn	21725	+	1		6.89819	0.265229	7.16342		0.94869	0.252717	1		1.24457	0.748639	1.25007		1.03493	0.0495276	5.30402	0.946958
CG2540	1202	+	1		0.424366	0	0.424366		0.927919	0.542913	1		0.578937	0.785226	1.11093		0.884188	-0.177575	3.0668	0.835969
Aven	1229	-	1		0.141455	0	0.141455		1.00461	0.746216	1		1.60816	1.33685	0.382903		1.01277	0.0183122	2.14292	0.982052
CG15728	4154	+	1		0	0.0471517	0.0471517		-	-	-		-	-	-		0.370912	-1.43085	-1.28275	1
CG11085	4903	+	1		0.0481996	0	0.0481996		-	-	-		-	-	-		1	5.13e-15	-1.36554	1
CG2543	3617	+	1		0.565821	0	0.565821		-	-	-		1.10274	0.705859	1.04086		1.05043	0.0709821	1.84877	0.93582
CG1463	2043	-	1		3.78786	244.413	248.201		0.828246	0.425724	1		1.03087	0.790816	1.06532		0.758638	-0.398517	4.58092	0.668125
Sec16	13838	+	1.42341		123.776	0.416507	124.192		1.04005	0.984314	0		1.47674	0.776087	1.06154		0.787334	-0.344953	5.65311	0.668072
CG1824	3081	-	1		2.68765	0.00214326	2.68979		0.808399	0.342496	1		0.834664	0.782219	0.917611		0.799273	-0.323239	5.72917	0.65003
LIMK1	7809	-	1		14.4352	0	14.4352		1.0066	0.81162	0		2.32424	0.788041	1.01395		0.999913	-0.000125851	5.04085	1
CG11138	11973	-	1		10.4839	0.212183	10.696		1.06586	0.33676	1		1.81067	0.709992	0.639608		1.24154	0.312126	6.71819	0.701592
CG15729	2409	-	1		0	0.0471517	0.0471517		0.393187	0.58267	0		0.964895	0	-		0.582631	-0.779346	0.485656	0.484464
Cpr11B	1112	+	1		0	0.0943035	0.0943035		-	-	-		-	-	-		1	5.13e-15	-1.36554	1
CG42251	12255	-	1		1.40403	1.0205	2.42453		0.727931	0.420211	1		1.07211	0.665025	0.907563		0.745604	-0.423518	2.19287	0.696224
CG2556	19387	+	1		0.81971	0.43447	1.25418		0.751273	0.407155	1		0.914111	0.560561	0.94728		0.889243	-0.169351	5.3089	0.851543
CG15730	2204	-	1		0.0471517	0.0471517	0.0943035		-	-	-		-	-	-		1.09877	0.135894	-1.16661	1
Lsp1alpha	2518	+	1		0	0.141455	0.141455		-	-	-		-	-	-		0.13008	-2.94253	-1.17183	0.607652
Cpr11A	2478	+	1		0	0.0471517	0.0471517		0.204895	0.258389	0		-	0.721902	-		0.552031	-0.857179	0.688474	0.62352
CG42258	13408	+	1		4.85663	0.186249	5.04288		0.792055	0.166339	1		2.4561	0.713342	0.979403		0.726111	-0.461738	4.95965	0.576315
Rab40	3317	-	1		2.31044	0.0565821	2.36702		1.10666	0.295101	1		2.20623	0.844232	1.26999		1.02014	0.0287725	5.67909	0.975037
CG15731	1357	-	1		0	0	0		-	-	-		-	-	-		0.862732	-0.213015	-0.657428	1
CG15927	570	+	1		0	0	0		-	-	-		-	-	-		1	5.13e-15	-1.36554	1
Pkcdelta	21425	+	1		0.521594	0.342021	0.863615		-	-	-		-	0	-		1.61069	0.687675	2.13517	0.702759
CG32652	1122	-	1		0	0	0		-	-	-		-	-	-		4.78764	2.25932	-1.26422	1
CG2574	977	+	1		0	0	0		-	-	-		-	-	-		4.78306	2.25793	-1.26422	1
CG32651	3862	-	1		0.0471517	0.150886	0.198037		-	-	-		-	-	-		0.487504	-1.03652	-1.00546	1
Ir11a	2160	-	1		0	0	0		-	-	-		-	-	-		1	5.13e-15	-1.36554	1
CG2577	1240	+	1		0	0	0		-	-	-		-	-	-		1	5.13e-15	-1.36554	1
CG32655	1316	-	1		0	1.60316	1.60316		-	-	-		0.321632	-	-		1.29436	0.372244	-0.719937	1
Ten-a	138285	+	4.53109		100.639	6.06796	106.707		0.953202	0.552342	1		2.40726	0.911724	1.27875		0.706547	-0.501143	6.21703	0.556074
CG1924	1713	-	1		0.110021	0.0235759	0.133597		-	-	-		9.1665	0.884912	0.514427		1.56647	0.64752	0.579027	0.595739
CG2750	6158	+	1		0	0.0471517	0.0471517		-	-	-		-	-	-		0.750051	-0.414939	-1.09414	1
CG11356	867	-	1		0	0	0		-	-	-		-	-	-		1	5.13e-15	-1.36554	1
CR32658	1009	+	1		0	0	0		-	-	-		-	-	-		1	5.13e-15	-1.36554	1
CR32657	485	+	1		0	0	0		-	-	-		-	-	-		1	5.13e-15	-1.36554	1
CG15734	557	-	1		0.00943035	0	0.00943035		-	-	-		-	-	-		1	5.13e-15	-1.36554	1
CG12721	819	-	1		0	0	0		1.0123	0.153315	1		0.932597	0.911876	3.57989		1.27297	0.348194	6.38851	0.66053
CG34323	827	+	1		0.707276	1.60316	2.31044		1.47535	0.487701	1		1.79619	1.41604	2.06492		1.68321	0.751214	6.89914	0.353874
Muc11A	5346	+	1		0.0471517	0	0.0471517		0.932823	1.55927	0		3.69876	0.59293	2.01987		0.627216	-0.672966	1.01883	0.647046
CG1950	1298	-	1		0	0	0		-	-	-		-	-	0.419355		0.248082	-2.01111	-1.20491	1
Cyp318a1	2652	+	1		0	0	0		-	-	-		-	0	-		2.72141	1.44436	-0.76481	0.456211
Cyp311a1	2182	-	1		0	0.0471517	0.0471517		-	-	-		0	0.412515	-		0.817814	-0.290156	0.765039	0.842058
Usp7	6201	-	1		9.71457	0.474291	10.1889		1.15002	1.20746	0		3.14209	0.845705	1.07662		0.984456	-0.0226008	6.27731	0.979082
Tango4	1685	+	1		0.165031	0.0471517	0.212183		1.13025	0.258753	1		1.0267	0.834197	0.661418		1.47177	0.55755	7.84505	0.57629
CG15735	2088	+	1		1.60593	0.0943035	1.70024		1.16351	0.491677	1		1.52482	0.901686	1.06289		1.04678	0.0659621	6.37134	0.935208
Chrac-16	683	-	1		1.41455	0.0589397	1.47349		0.942804	0.211964	1		1.10809	0.823374	0.969462		1.23826	0.30831	7.03733	0.717053
regucalcin	4625	+	1		0.990186	0.737588	1.72777		0.818671	0.352367	1		0.942966	1.19239	0.277061		1.05523	0.0775585	6.78514	0.937903
CG1492	2501	-	1		1.3674	0	1.3674		0.872974	0.362861	1		1.67963	0.847031	1.02827		0.714316	-0.485366	4.10482	0.603244
CG1806	2729	+	1		0	0.377214	0.377214		0.652688	0.109978	1		0.688142	0.64169	0.893597		0.74098	-0.432494	5.01391	0.505134
fw	10996	-	1		0	0.0538877	0.0538877		0.583186	0.372198	1		-	0.631664	0.711241		0.545004	-0.875663	1.27829	0.378699
CG18130	2651	-	1		0.00314345	0	0.00314345		-	-	-		0	-	-		4.87272	2.28473	-1.26404	1
tsg	881	-	1		0	0.121809	0.121809		-	-	-		-	-	-		1	5.13e-15	-1.36554	1
gd	2190	-	1		3.20632	0	3.20632		1.27191	0.336756	1		0.918207	0.588735	1.28343		1.20887	0.273657	3.42719	0.722738
cac	53139	-	1		104.537	0.399555	104.936		0.916335	0.426698	1		1.88691	0.547838	1.17099		1.03784	0.0535803	5.88473	0.940675
CG10362	4441	-	1		0.377214	0	0.377214		-	-	-		-	0.481268	0.936021		0.62244	-0.683993	-0.000951565	0.662222
Sclp	3016	-	1		0.141455	0.00937965	0.150835		1.65402	0.765517	1		1.2345	1.29444	1.56501		1.6537	0.725695	3.62273	0.35942
CR32660	782	-	1		0	0	0		-	-	-		-	-	-		1	5.13e-15	-1.36554	1
CR43157	533	-	1		0	0	0		-	-	-		-	-	-		1	5.13e-15	-1.36554	1
CR32661	873	-	1		0	0	0		-	-	-		-	-	-		1	5.13e-15	-1.36554	1
pot	9845	-	1		2.12969	1.41455	3.54424		-	-	-		2.50873	0.787529	1.94489		1.17683	0.234902	0.471479	1
CG43156	362	-	1		0.0471517	0	0.0471517		1.54719	1.52191	0		1.07211	0.756278	0.209677		0.824092	-0.279123	4.6551	0.760864
Upf1	4904	-	1		3.06486	0	3.06486		1.84156	1.57885	0		2.09731	0.720198	1.11906		1.2877	0.364799	4.56942	0.684393
wisp	5966	+	1		0.707276	0	0.707276		0.690465	0.273565	1		2.10523	1.17643	0.940502		0.880272	-0.18398	1.25051	0.896178
CG15738	1740	+	1		0.235759	0.0471517	0.28291		0.772651	0.11138	1		0.913019	0.88683	0.936022		0.918264	-0.123019	4.83151	0.865688
CG1840	832	+	1		0.330062	0.0471517	0.377214		0.78463	0.440264	1		1.24632	1.23205	2.20645		0.618364	-0.693471	6.32549	0.506222
SelG	963	+	1		2.26328	0.0471517	2.31044		0.849179	0.210295	1		0.869024	0.789106	1.36038		1.17431	0.231817	8.04779	0.795071
CG10353	9423	-	1.23434		67.5213	0.518669	68.04		0.931224	0.393825	1		2.22865	0.770508	1.0922		0.926207	-0.110593	6.16907	0.882923
CG10352	1651	-	1		0.188607	0.141455	0.330062		0.998574	1.00616	0		-	0.962535	-		1.15667	0.209978	0.74256	1
CG15739	2027	+	1		0.424366	0	0.424366		0.801573	0.192311	1		1.27191	1.09037	1.12634		0.848231	-0.23747	3.46012	0.764083
CG11802	1480	-	1		0.471517	0	0.471517		0.919103	0.17822	1		1.36693	1.13239	1.38581		1.32345	0.404305	5.6262	0.670789
CG1847	1981	+	1		3.34777	0.141455	3.48923		0.945638	0.45399	1		1.46555	0.919345	0.914657		0.830743	-0.267526	4.1931	0.72914
CG2025	4236	-	1		7.87434	1.2731	9.14744		1.4424	0.967439	1		4.40607	0.978333	1.17282		1.77619	0.828788	5.14246	0.300784
ATP7	8796	+	1.46868		1.2731	0.825155	2.09825		1.87601	1.1196	1		1.42574	0.851309	1.0234		1.33776	0.419817	3.36073	0.64537
CG10347	2189	-	1		0.943035	0.117879	1.06091		1.28732	0.856602	1		1.23442	0.984816	1.16875		1.15397	0.206603	4.77477	0.750902
p24-1	1185	-	1		1.74461	0.0471517	1.79177		0.737052	0.0982964	1		1.17019	0.870102	1.44962		0.819858	-0.286554	6.4037	0.685426
CG15740	3438	-	1		0.102162	0.0471517	0.149314		-	-	-		-	-	-		4.78757	2.25929	-1.26422	1
Cyp28c1	1774	+	1		0	0.0471517	0.0471517		-	-	-		-	-	0.936021		0.498345	-1.00478	-0.361402	0.617927
CG15741	408	-	1		0	0.0235759	0.0235759		-	-	-		-	-	-		1.11737	0.160103	-0.497368	1
CG43154	20563	+	2.65638		20.2431	0.223568	20.4666		0.792159	0.342609	1		1.62049	0.701244	0.852531		0.90659	-0.141478	6.68447	0.855348
CG1578	7178	-	1		4.71517	0.150886	4.86606		0.978443	0.217715	1		0.690963	0.731375	0.988737		1.10527	0.1444	4.97255	0.825693
Hsc70-3	5484	-	2.28886		42.4287	0.707276	43.136		1.0038	0.856252	0		2.76439	0.901259	1.13418		1.09874	0.135846	7.90251	0.868252
CkIIbeta	8129	+	1		26.02	0.0471517	26.0672		0.794049	0.168634	1		1.63681	0.825136	1.13941		0.903099	-0.147043	7.77115	0.867947
Karl	3408	+	1		0.0707276	0.0432224	0.11395		-	-	-		2.89468	1.40005	3.00269		1.19085	0.251991	1.12897	0.864786
dy	8904	-	1		0.0174689	0.051081	0.06855		-	-	-		-	0.962535	-		1.50973	0.594294	1.1305	0.722844
CG9360	1115	-	1		1.37195	0.0956903	1.46764		0.55516	0.0841173	1		1.0453	0.673775	0.691667		0.647489	-0.627073	5.50614	0.44551
m	15236	+	1		0.142217	1.45561	1.59783		0.378949	0.2412	1		0.951111	0.302511	0.587694		0.38356	-1.38248	4.72088	0.0844759
inaF-A	7506	-	1		0.0471517	0	0.0471517		-	-	-		-	0	-		2.77954	1.47485	-0.942552	1
inaF-C	5376	-	1		0.0471517	0	0.0471517		-	-	-		-	0	-		2.77961	1.47488	-0.942552	1
inaF-B	8103	-	1		0.0471517	0.0471517	0.0943035		-	-	-		-	0.64169	0.419355		0.579689	-0.786649	1.55681	0.604485
inaF-D	4147	-	1		0	0.0471517	0.0471517		-	-	-		-	0.481268	0.419355		0.577389	-0.792385	1.56763	0.59738
CG15221	12278	+	1		0.0471517	0.0471517	0.0943035		-	-	-		-	-	1.09704		0.971233	-0.0421112	-1.04298	1
Tango10	3620	+	1		7.16706	0.0471517	7.21422		0.911239	0.281961	1		1.67451	0.857549	0.888366		0.996538	-0.00500302	4.92444	1
prtp	3107	+	1		2.40474	0.0471517	2.45189		0.670408	0.0900608	1		1.21421	0.852229	1.26623		0.841381	-0.249169	7.32604	0.755711
Amun	4911	-	1		15.8258	0.141455	15.9673		1.51781	1.36371	0		2.45487	0.894654	1.12748		1.09118	0.125891	7.24637	0.892769
FucT6	3376	-	1		2.69102	0.28291	2.97393		0.868837	0.180921	1		1.27404	0.825606	1.01328		0.986986	-0.0188991	4.71558	0.983487
CG2444	702	-	1		0	0.943035	0.943035		-	-	-		-	0.962535	-		1.55846	0.640117	-0.613933	1
PhKgamma	9283	+	2.75754		8.31442	0.00428652	8.31871		0.661237	0.147543	1		1.46274	0.651684	1.13719		0.737871	-0.43856	5.86691	0.572615
bif	15747	+	6.93308		11.7044	0.0572557	11.7617		1.12256	0.607583	1		1.58787	0.783932	0.875086		1.18096	0.239962	6.03037	0.729879
CG2371	1209	-	1		0.990186	0.0471517	1.03734		0.787518	0.145059	1		1.61096	1.01661	1.00591		0.912162	-0.132638	5.22978	0.868731
Ptp10D	55311	+	1		64.4716	2.74725	67.2189		1.13131	0.64615	1		1.60398	0.709372	0.9433		0.860222	-0.21722	5.54926	0.781051
Met	3823	+	1		2.31044	0.0943035	2.40474		1.54789	1.54418	0		1.646	0.872699	0.903438		0.979202	-0.0303213	3.16564	0.974089
CG15220	612	-	1		0.754428	0.141455	0.895883		0.780467	0.275555	1		0.840701	0.91863	1.05584		0.874437	-0.193573	9.45673	0.832935
[truncated: 12,159 more rows]
