# Supplementary material for: Transposable element dynamics and PIWI regulation impacts lncRNA and gene expression diversity in Drosophila ovarian cell cultures
Source: HighWire-hosted journal article supplement (doi:10.1101/gr.178129.114), 2014-09-29
Supplement: Supplemental_Tables_S1_S6.zip [file TableS3_PiwiTE_AffectedGenes_0731.xlsx]

## Sheet: TableS3
Table S3. Genes upregulated upon PIWI KD and near a de novo TE insertion in OSS_C and OSC_C cells.
145 OSS_C Genes with >1.7fold change and nearby TE									97 OSC_C Genes with >1.7 fold change and nearby TE
Gene#	Gene	# of nearby de novo TEs	First_TE insert	Last_TE insert	Fold upreg. PIWI KD	EdgeR fold upreg.	EdgeR Pvalue_exact		Gene#	Gene	# of nearby de novo TEs	First_TE insert	Last_TE insert	Fold upregulation PIWI KD	DE-Seq calculated Fold upreg.	DE-Seq calculated p-val		6 genes (highlighted in yellow) are upregulated by PIWI knockdown in both cell lines.	OSC cell PIWI KD upreg	OSS cell PIWI KD upreg
1	CG42817	1	ZAM	ZAM	86.4482	3.79456	0.0245415		1	CG15828	1	mdg1	mdg1	134.968	301.831	5.73145e-19		CG16779	13.3548	1.86801
2	TwdlL	1	ZAM	ZAM	55.6002	21.0611	1.02e-06		2	igl	1	mdg1	mdg1	57.1667	n.c.	n.c.		CG2233	3.21178	1.94091
3	CG12691	2	mdg1	ZAM	43.6952	3.07541	0.129029		3	elk	1	gypsy	gypsy	40.987	49.0454	1.4403e-09		CG42750	2.26667	2.0879
4	CG11426	1	mdg1	mdg1	19.1655	1.42072	0.620228		4	Rdl	1	gypsy	gypsy	40.9333	9.07004	0.345193		elk	40.987	2.857
5	fau	1	ZAM	ZAM	18.8935	12.3778	0.000299867		5	CG43174	1	blood	blood	35.6	n.c.	0.0462614		Grd	4.84892	1.78288
6	Frq2	1	hopper	hopper	18.2227	5.31544	0.00906636		6	Lim3	1	Stalker2	Stalker2	25.1613	n.c.	0.993952		Hsp70Bc	1.85215	2.20965
7	Mec2	1	297	297	11.9647	7.31776	0.00777932		7	ex	2	gypsy	hopper	20.2602	24.961	5.3986e-22
8	RpL37b	1	springer	springer	9.85125	5.70072	0.0611618		8	CG1317	1	gypsy	gypsy	15.5974	15.8726	2.24951e-05
9	CG32082	1	Stalker2	Stalker2	8.88802	7.83932	0.00133925		9	W	1	gypsy	gypsy	14.5	18.8959	0.00539643
10	Oatp58Dc	1	gypsy	gypsy	8.14603	4.2244	0.0713924		10	CG4374	1	gypsy	gypsy	13.7826	n.c.	0.993952
11	Cda5	1	ZAM	ZAM	7.89684	2.87586	0.0998101		11	CG16779	1	mdg1	mdg1	13.3548	1.00778	1
12	Pde6	2	ZAM	Juan	7.81147	1.30741	0.700373		12	klg	1	mdg1	mdg1	12.2581	n.c.	0.993952
13	CG4324	1	412	412	6.50346	7.74489	4.93e-05		13	CG12831	1	gypsy	gypsy	12	14.6128	0.135633
14	chas	2	297	ZAM	6.31755	5.46146	0.00863889		14	blanks	1	gypsy	gypsy	11.8387	14.1089	0.0253141
15	CG12484	1	ZAM	ZAM	5.95576	5.75917	0.00711534		15	CG16884	1	mdg3	mdg3	11.5333	n.c.	0.25119
16	Mst84Dd	1	springer	springer	5.38178	5.22511	0.0592336		16	neo	1	412	412	9.5	10.275	6.78495e-08
17	Cyp28d1	1	F-element	F-element	5.18812	4.75369	0.00173765		17	CG42313	1	rover	rover	9.3587	0	0.587131
18	CG31869	1	ZAM	ZAM	5.15934	5.38418	0.00229142		18	CG32295	1	gypsy	gypsy	8	9.07004	0.345193
19	GlcAT-S	1	ZAM	ZAM	4.45517	4.1473	0.0193564		19	Teh1	1	roo	roo	7.53247	5.5428	0.602768
20	gogo	1	ZAM	ZAM	4.13148	4.79308	0.0122612		20	CG12477	1	297	297	6.86232	8.17423	0.00152814
21	CG7922	1	mdg3	mdg3	4.06997	2.4523	0.181338		21	Cyp6a19	1	Stalker2	Stalker2	6.3907	7.82969	0.000313951
22	CG16857	1	ZAM	ZAM	3.96872	4.46041	0.00632482		22	CG42366	1	blood	blood	6.2	6.55058	0.516335
23	sr	1	ZAM	ZAM	3.94993	1.7261	0.518332		23	Cyp6a9	1	Stalker2	Stalker2	5.96748	6.80253	5.25901e-06
24	CG33080	1	pogo	pogo	3.60188	3.63006	0.034257		24	onecut	1	springer	springer	4.86667	6.04669	0.558182
25	fas	2	HMS-Beagle	ZAM	3.59586	0.85668	0.84123		25	Grd	1	gypsy	gypsy	4.84892	10.5817	0.0253555
26	CG4660	1	ZAM	ZAM	3.56053	4.72937	0.0524307		26	ko	1	gypsy	gypsy	4.73739	1.55549	0.549565
27	Desi	1	ZAM	ZAM	3.52439	2.61133	0.107449		27	CG13028	1	R1A1-ele	R1A1-ele	4.46667	5.03891	0.650137
28	CG32365	1	ZAM	ZAM	3.2112	2.4721	0.261505		28	CR43431	1	roo	roo	4.37705	3.72879	0.27621
29	CG31798	2	gypsy	gypsy	3.17649	2.73651	0.128611		29	Oat	1	springer	springer	4.34558	5.23781	7.95364e-05
30	CG15529	1	ZAM	ZAM	3.05094	2.43397	0.214426		30	CG8046	1	HMS-Beagle	HMS-Beagle	4.19565	3.42646	0.327135
31	CG32773	1	ZAM	ZAM	3.04665	4.03251	0.110814		31	CG30076	1	blood	blood	4.18378	6.33463	0.0232376
32	CG10936	1	ZAM	ZAM	3.01659	1.42682	0.622363		32	CG8607	1	297	297	4.04359	5.37193	1.22403e-09
33	sn	1	ZAM	ZAM	2.97953	3.03272	0.0606258		33	Ance-3	2	gypsy	gypsy	3.81884	0.755837	1
34	CG3631	1	gypsy5	gypsy5	2.9784	1.07037	0.916458		34	CG43124	1	copia	copia	3.70109	4.28307	0.0407166
35	elk	1	ZAM	ZAM	2.857	2.47491	0.17391		35	hth	1	blood	blood	3.6	n.c.	0.993952
36	Appl	1	ZAM	ZAM	2.8272	1.62823	0.423311		36	CG4928	1	gypsy	gypsy	3.59557	3.43349	0.00510888
37	CG1358	1	BS	BS	2.81399	2.08888	0.38396		37	CG11459	1	412	412	3.5599	4.13191	0.00616538
38	CG2186	1	ZAM	ZAM	2.74535	3.11017	0.0557922		38	Spn	1	gypsy	gypsy	3.29162	3.93527	2.02109e-07
39	CG14096	1	ZAM	ZAM	2.73159	1.63132	0.66929		39	Or19a	1	gypsy	gypsy	3.27778	4.10311	0.138987
40	CG2022	1	mdg3	mdg3	2.6618	1.65343	0.519407		40	CG2233	1	297	297	3.21178	3.86316	0.000257619
41	Pdk1	1	copia	copia	2.62627	2.11968	0.195545		41	snRNA:U4:38AB	1	copia	copia	3.18534	3.69644	4.23695e-07
42	CG8854	1	297	297	2.62453	2.60094	0.0769026		42	CG3097	1	copia	copia	2.94225	3.5405	0.000536712
43	CG4666	1	ZAM	ZAM	2.60088	2.65225	0.121401		43	CG4168	1	Stalker2	Stalker2	2.88735	3.18522	0.000115544
44	CG1835	1	ZAM	ZAM	2.59278	1.97466	0.477876		44	CG15630	1	pogo	pogo	2.83607	n.c.	0.70416
45	CG15803	2	ZAM	Juan	2.57458	1.06468	0.97451		45	bab1	1	gypsy	gypsy	2.8061	4.26369	0.000243175
46	sdt	1	ZAM	ZAM	2.56509	2.62177	0.0447555		46	CG5050	1	springer	springer	2.79576	3.54143	0.000683
47	CG2199	1	ZAM	ZAM	2.53493	2.3458	0.145141		47	CG14377	1	springer	springer	2.76087	3.10733	0.333975
48	CG4622	1	ZAM	ZAM	2.53461	1.40358	0.578345		48	Socs36E	1	springer	springer	2.69348	3.20549	4.17889e-06
49	beat-IIIc	1	Doc	Doc	2.5338	1.01496	0.986155		49	CG10559	1	flea	flea	2.66667	3.02335	0.866836
50	RhoGAP100F	1	opus	opus	2.50871	2.66738	0.0650117		50	CG13739	1	flea	flea	2.66667	n.c.	n.c.
51	CG42268	1	opus	opus	2.49518	2.30046	0.163061		51	CG42524	1	copia	copia	2.66568	3.47125	0.160499
52	Rh6	1	ZAM	ZAM	2.48212	2.71391	0.233552		52	CG13957	1	copia	copia	2.62063	0.76059	0.635221
53	CG8172	1	springer	springer	2.47294	2.55197	0.160706		53	CG11255	1	gtwin	gtwin	2.57417	2.92145	7.44358e-05
54	Pvf1	1	jockey	jockey	2.4537	2.01593	0.348371		54	CG8509	1	gypsy	gypsy	2.435	2.82954	0.186317
55	stan	1	ZAM	ZAM	2.40025	1.14622	0.869631		55	CG9572	1	springer	springer	2.43333	0.503891	1
56	Peritrophin-A	1	roo	roo	2.39506	0.980352	0.981966		56	Oseg5	1	gypsy	gypsy	2.37738	2.79042	0.00309486
57	poe	1	Quasimodo	Quasimodo	2.39167	2.67659	0.0702036		57	CG14857	1	gypsy	gypsy	2.37097	3.02335	0.567122
58	beat-Ib	1	springer	springer	2.38962	1.77993	0.32549		58	bbg	1	gypsy	gypsy	2.35476	2.69006	0.00300407
59	ds	1	412	412	2.38247	2.2047	0.249132		59	CG42750	1	roo	roo	2.26667	0	0.949722
60	sc	2	ZAM	ZAM	2.35074	1.14265	0.872111		60	Pvf3	1	copia	copia	2.22066	2.95136	0.0454819
61	CG14372	1	mdg3	mdg3	2.33671	1.41025	0.725553		61	betaTub60D	1	hopper	hopper	2.21791	2.56297	0.000156734
62	Hsp23	1	springer	springer	2.32705	2.71653	0.086654		62	wun	1	FB	FB	2.21782	2.43389	0.0440225
63	Ca-alpha1T	1	ZAM	ZAM	2.31397	2.3305	0.0781315		63	CG7368	1	mdg3	mdg3	2.2	2.01556	0.989834
64	CG32043	1	ZAM	ZAM	2.30576	1.44246	0.578046		64	Cpr67Fa2	1	412	412	2.2	n.c.	0.84799
65	CG1516	1	roo	roo	2.30463	1.27478	0.717599		65	snoRNA:lola-a	1	pogo	pogo	2.2	2.51946	0.927229
66	Spc105R	1	ZAM	ZAM	2.30036	2.42504	0.103707		66	Tbh	1	springer	springer	2.14623	4.73658	0.153569
67	Cpr51A	1	springer	springer	2.27693	1.42099	0.586437		67	CG10734	1	springer	springer	2.12338	2.63143	0.328799
68	pea	1	Juan	Juan	2.25709	2.4585	0.127653		68	CG16947	2	297	blood	2.00409	2.07528	0.0323004
69	CG1648	1	ZAM	ZAM	2.24654	2.83664	0.122414		69	stil	1	S-element	S-element	1.98701	2.21712	0.618547
70	CG10265	2	mdg3	mdg3	2.23541	1.08153	0.909675		70	Gef64C	1	copia	copia	1.98605	3.32568	0.345839
71	tau	1	ZAM	ZAM	2.22788	1.12082	0.863336		71	CG15570	1	roo	roo	1.98452	2.20937	0.192764
72	Hsp70Bc	1	Stalker2	Stalker2	2.20965	2.38159	0.0657747		72	Sk1	1	springer	springer	1.96911	2.34555	0.0149926
73	bs	1	ZAM	ZAM	2.18795	2.41035	0.103777		73	CG43125	2	springer	springer	1.95122	3.6952	0.131336
74	ru	1	F-element	F-element	2.18712	1.00643	1		74	CG8993	1	gypsy	gypsy	1.93531	2.24296	0.00933878
75	L	1	ZAM	ZAM	2.17423	1.9193	0.231109		75	CG7227	1	springer	springer	1.92391	2.74341	0.299876
76	CG14960	1	ZAM	ZAM	2.16797	1.91993	0.188379		76	rk	1	flea	flea	1.92105	1.00778	1
77	CG17816	1	3S18	3S18	2.14005	2.24239	0.125238		77	CG12594	1	mdg3	mdg3	1.90727	2.01556	0.533209
78	CG13737	1	ZAM	ZAM	2.10767	0.921827	0.902153		78	upd2	1	jockey	jockey	1.90421	2.27397	0.104275
79	su(Hw)	1	jockey	jockey	2.10183	2.59472	0.0768007		79	CR43264	1	297	297	1.8913	2.18353	0.756986
80	raw	1	412	412	2.09992	2.33392	0.0697829		80	Sc2	1	springer	springer	1.89085	2.07883	0.016551
81	kek2	1	ZAM	ZAM	2.09482	2.39546	0.136877		81	CG11966	1	springer	springer	1.88006	2.40991	0.160656
82	CG42750	1	mdg3	mdg3	2.0879	2.10982	0.296601		82	Cpr	1	gypsy	gypsy	1.86372	1.64012	0.198739
83	crb	1	ZAM	ZAM	2.07488	1.80105	0.233795		83	CG17841	1	roo	roo	1.86342	2.82039	0.00128687
84	CG42340	1	297	297	2.07151	1.36755	0.649079		84	Hsp70Bc	1	Stalker2	Stalker2	1.85215	2.16892	0.00468288
85	Rrp6	1	gypsy5	gypsy5	2.07128	2.11879	0.188825		85	CG42674	1	copia	copia	1.84641	1.81939	0.0881624
86	CG42526	1	412	412	2.06772	0.881855	0.880734		86	CG13252	1	gypsy	gypsy	1.84264	1.9768	0.0332466
87	DJ-1alpha	1	mdg3	mdg3	2.06139	2.30045	0.16343		87	CG12540	1	springer	springer	1.80764	2.1184	0.0430721
88	CG14985	1	412	412	2.06105	1.94515	0.168432		88	CG4434	1	jockey	jockey	1.8		0.84799
89	raptor	1	ZAM	ZAM	2.04852	1.29979	0.674522		89	CG1582	1	412	412	1.8	2.01556	0.989834
90	CG2875	1	mdg3	mdg3	2.02823	1.01766	0.980772		90	CG43072	1	roo	roo	1.8	1.51167	1
91	Gcn2	1	ZAM	ZAM	2.02516	1.61646	0.409702		91	CG42788	1	springer	springer	1.78466	2.09619	0.0151006
92	daw	1	ZAM	ZAM	2.00857	1.72724	0.343182		92	CG34411	1	gypsy	gypsy	1.78432	4.02162	0.00046014
93	CG6723	1	blood	blood	1.99608	2.4458	0.111408		93	CG10641	1	springer	springer	1.78178	2.14618	0.0025765
94	p130CAS	1	springer	springer	1.99605	1.25567	0.752501		94	Ir7c	1	roo	roo	1.72727	1.81401	0.752394
95	Cbp80	1	mdg3	mdg3	1.98616	1.73982	0.334684		95	eys	1	hopper	hopper	1.72626	2.01556	0.564055
96	CG2233	1	springer	springer	1.94091	1.98341	0.177344		96	pigs	1	springer	springer	1.71799	2.20713	0.00811385
97	Ir76a	1	flea	flea	1.93081	0.963093	1		97	CG7023	1	gypsy	gypsy	1.7036	1.71323	0.20271
98	imd	1	roo	roo	1.92214	0.892824	0.901531
99	CG2747	1	mdg1	mdg1	1.92074	1.99467	0.156453
100	CG14566	1	ZAM	ZAM	1.90172	1.81696	0.666365
101	Cad96Ca	1	412	412	1.89918	2.0955	0.274995
102	CG5555	1	ZAM	ZAM	1.89552	1.94565	0.223919
103	Ac76E	1	Ivk	Ivk	1.8897	1.04558	0.955662
104	Hsp27	1	springer	springer	1.8846	0.948855	0.948482
105	lz	1	ZAM	ZAM	1.88218	1.90718	0.210774
106	Pde1c	1	mdg3	mdg3	1.88001	1.69162	0.340599
107	CG31475	1	ZAM	ZAM	1.87577	2.69499	0.297162
108	slbo	1	ZAM	ZAM	1.8745	1.91509	0.539302
109	mud	1	roo	roo	1.87275	1.88772	0.189455
110	CG16779	1	ZAM	ZAM	1.86801	1.72774	0.435421
111	CG18522	1	ZAM	ZAM	1.86024	1.39613	0.634166
112	CG11148	1	ZAM	ZAM	1.84691	1.96084	0.218327
113	Sobp	1	ZAM	ZAM	1.84605	1.58902	0.480414
114	CG17265	1	ZAM	ZAM	1.83487	1.56199	0.405812
115	Ranbp9	1	blood	blood	1.82515	1.77204	0.299086
116	ncm	1	ZAM	ZAM	1.81009	2.14375	0.168824
117	CG10209	1	mdg1	mdg1	1.79694	1.99525	0.2061
118	hiw	1	mdg3	mdg3	1.79558	1.43541	0.562433
119	CG11147	1	3S18	3S18	1.79215	1.02602	0.980666
120	CG11983	1	mdg3	mdg3	1.79123	1.89202	0.346397
121	CG4294	1	gypsy	gypsy	1.7833	2.1102	0.181487
122	Grd	1	mdg3	mdg3	1.78288	1.06344	0.961684
123	CG42533	1	pogo	pogo	1.77242	1.50048	0.5516
124	eater	1	ZAM	ZAM	1.77151	1.76983	0.386884
125	CG8939	1	ZAM	ZAM	1.76793	1.99343	0.230676
126	Sec22	1	ZAM	ZAM	1.76755	2.20205	0.232522
127	Dh44-R2	1	ZAM	ZAM	1.76582	1.92663	0.298225
128	Npc1b	1	ZAM	ZAM	1.75839	1.94187	0.307634
129	Moe	1	mdg3	mdg3	1.74773	1.52591	0.429572
130	Invadolysin	1	ZAM	ZAM	1.74478	1.66493	0.323536
131	CG16789	1	mdg3	mdg3	1.74418	1.78727	0.247074
132	ec	1	ZAM	ZAM	1.73835	1.65087	0.379924
133	CG7131	1	ZAM	ZAM	1.73177	1.8336	0.338249
134	kel	1	Quasimodo	Quasimodo	1.72817	1.94384	0.221642
135	clu	1	S-element	S-element	1.72407	1.46926	0.442653
136	CG10979	1	mdg3	mdg3	1.7221	1.88156	0.28789
137	CG34104	1	ZAM	ZAM	1.72148	1.19064	0.800037
138	CG13917	1	FB	FB	1.72103	1.63089	0.362758
139	CG10089	2	springer	ZAM	1.71977	0.780878	0.733727
140	U26	1	roo	roo	1.71535	1.07154	0.92626
141	RecQ5	2	diver	diver	1.71388	1.13352	0.883328
142	ed	1	copia	copia	1.71357	1.02041	0.975328
143	CG32241	1	ZAM	ZAM	1.71193	2.36504	0.276185
144	Muc12Ea	1	ZAM	ZAM	1.70337	1.09274	0.9494
145	dup	2	1360	1360	1.70006	1.63856	0.358142
