# Supplementary material for: Transposable element dynamics and PIWI regulation impacts lncRNA and gene expression diversity in Drosophila ovarian cell cultures
Source: HighWire-hosted journal article supplement (doi:10.1101/gr.178129.114), 2014-09-29
Supplement: Supplemental_Tables_S1_S6.zip [file TableS4_OSS_OSC_TEInserts_0924.xlsx]

## Sheet: OSS_C_TE_Inserts
Table S4. De novo TE insertions in Drosophila gonadal cell cultures. Tab: OSS_C_TE_Inserts
Insertion#	Release 5 coordinates			Release 6 coordinates			TE	TE_coord_start	TE_coord_end	TE_Insert_Reads	Chr_Coord_Dist	Symmetry	avg_BLAT_score	RefGenome_Reads	Coverage_Ratio	Classification	Comments
	Chr	Chr_coord_start	Chr_coord_end	Chr	Chr_coord_start	Chr_coord_end
1	chr2L	30515	30732	chr2L	30515	30732	ZAM	452	12	12	217	5-7	71.78	11	1	intron	Cda5
2	chr2L	65552	65769	chr2L	65552	65769	412	9	7543	17	217	10-7	68.51	5	2.83333	intergenic	dbr
3	chr2L	116983	117098	chr2L	116983	117098	flea	4861	5004	8	115	5-3	76.33	1	4	intron	CG11455
4	chr2L	127349	127573	chr2L	127349	127573	springer	377	7136	23	224	7-16	71.74	12	1.76923	intron	CG11455
5	chr2L	131247	131439	chr2L	131247	131439	jockey	4939	9	10	192	5-5	63.73	4	2	intron	CG11455
6	chr2L	309401	309550	chr2L	309401	309550	ZAM	456	8046	7	149	3-4	78.19	7	0.875	intron	Plc21C
7	chr2L	323899	324118	chr2L	323899	324118	mdg3	235	5251	24	219	10-14	68.11	9	2.4	intron	Plc21C
8	chr2L	465278	465352	chr2L	465278	465352	copia	26	100	8	74	5-3	66.58	0	8	intron	CG4297
9	chr2L	467686	467905	chr2L	467686	467905	ZAM	7973	453	14	219	5-9	67.62	12	1.07692	intron	CG4297
10	chr2L	482746	482873	chr2L	482746	482873	ZAM	15	363	8	127	4-4	68.58	0	8	intron	ush
11	chr2L	574114	574326	chr2L	574114	574326	ZAM	7	442	16	212	12-4	70.75	0	16	exon	Ipk2
12	chr2L	606070	606304	chr2L	606070	606304	ZAM	8412	454	16	234	6-10	69.88	0	16	5` UTR	CR43648
13	chr2L	635109	635330	chr2L	635109	635330	ZAM	443	7961	15	221	5-10	74.27	14	1	intergenic	not near genes
14	chr2L	637688	637775	chr2L	637688	637775	412	7543	7090	7	87	2-5	65.33	0	7	intergenic	ds
15	chr2L	638000	638216	chr2L	638000	638216	ZAM	5	444	22	216	17-5	72.03	8	2.44444	intergenic	ds
16	chr2L	639343	639552	chr2L	639343	639552	ZAM	15	447	25	209	12-13	71.55	13	1.78571	intergenic	ds
17	chr2L	644740	644960	chr2L	644740	644960	ZAM	457	7976	13	220	6-7	72.41	10	1.18182	exon	ds
18	chr2L	651970	652151	chr2L	651970	652151	ZAM	7968	410	17	181	14-3	66.39	0	17	intron	ds
19	chr2L	684149	684372	chr2L	684149	684372	ZAM	7962	446	14	223	7-7	72.14	9	1.4	intron	ds
20	chr2L	700628	700857	chr2L	700628	700857	ZAM	4	456	22	229	15-7	64.48	10	2	intron	ds
21	chr2L	719978	720192	chr2L	719978	720192	ZAM	450	7975	16	214	6-10	67.71	22	0.695652	intergenic	not near genes
22	chr2L	723238	723426	chr2L	723238	723426	ZAM	36	8411	20	188	14-6	70.07	0	20	intergenic	not near genes
23	chr2L	726031	726258	chr2L	726031	726258	copia	4	257	14	227	10-4	68.67	3	3.5	intergenic	Hsp60B
24	chr2L	727636	727870	chr2L	727636	727870	ZAM	7962	457	24	234	14-10	70.61	15	1.5	intergenic	Hsp60B
25	chr2L	758765	758955	chr2L	758765	758955	ZAM	411	7961	16	190	4-12	71.54	23	0.666667	intron	GABA-B-R3
26	chr2L	833038	833126	chr2L	833038	833126	jockey	106	17	10	88	6-4	70.87	0	10	intergenic	dock
27	chr2L	833309	833396	chr2L	833309	833396	BS	90	3	10	87	6-4	68.67	0	10	intergenic	dock
28	chr2L	928099	928304	chr2L	928099	928304	mdg3	5252	5474	20	205	12-8	67.23	11	1.66667	intron	CG4341
29	chr2L	986035	986266	chr2L	986035	986266	ZAM	7960	8414	36	231	23-13	71.43	14	2.4	intergenic	not near genes
30	chr2L	1065839	1066059	chr2L	1065839	1066059	412	9	493	20	220	12-8	68	11	1.66667	intron	S
31	chr2L	1107521	1107752	chr2L	1107521	1107752	ZAM	454	7962	26	231	7-19	72.31	4	5.2	exon	mtRNApol
32	chr2L	1134696	1134910	chr2L	1134696	1134910	mdg3	5253	5484	29	214	15-14	67.75	2	9.66667	5` UTR	CG4577
33	chr2L	1228648	1228862	chr2L	1228648	1228862	roo	13	407	15	214	11-4	68.8	10	1.36364	exon	CG42329
34	chr2L	1319172	1319388	chr2L	1319172	1319388	HMS-Beagle	236	4	24	216	4-20	72.08	3	6	intergenic	not near genes
35	chr2L	1435097	1435226	chr2L	1435097	1435226	ZAM	363	7975	10	129	3-7	68.13	6	1.42857	intergenic	snRNA:U3:22A
36	chr2L	1472465	1472694	chr2L	1472465	1472694	springer	386	3	12	229	4-8	68.95	10	1.09091	intergenic	not near genes
37	chr2L	1563716	1563934	chr2L	1563716	1563934	ZAM	7979	458	21	218	6-15	71.78	8	2.33333	intron	haf
38	chr2L	1578703	1578933	chr2L	1578703	1578933	gypsy	462	6987	67	230	34-33	70.84	10	6.09091	intron	haf
39	chr2L	1643940	1644168	chr2L	1643940	1644168	mdg1	7458	7038	25	228	15-10	69.71	2	8.33333	intergenic	not near genes
40	chr2L	1696866	1697075	chr2L	1696866	1697075	accord	7365	2	14	209	7-7	71.43	34	0.4	3` UTR	chinmo
41	chr2L	1882996	1883215	chr2L	1882996	1883215	ZAM	1	443	26	219	20-6	71.03	23	1.08333	exon	CG15358
42	chr2L	1886015	1886196	chr2L	1886015	1886196	412	460	15	14	181	5-9	68.48	6	2	intergenic	CG15358
43	chr2L	1891911	1892123	chr2L	1891911	1892123	roo	399	10	15	212	6-9	68.49	1	7.5	intergenic	not near genes
44	chr2L	1931217	1931445	chr2L	1931217	1931445	mdg3	247	5254	14	228	8-6	74.33	12	1.07692	intron	CG7337
45	chr2L	2345585	2345809	chr2L	2345585	2345809	hopper	1412	1413	24	224	7-17	70	0	24	intron	CG9967
46	chr2L	2358599	2358829	chr2L	2358599	2358829	ZAM	7962	453	17	230	11-6	74	14	1.13333	intergenic	CG9967
47	chr2L	2374176	2374365	chr2L	2374176	2374365	hobo	2926	14	6	189	2-4	61.78	0	6	intergenic	CG3597
48	chr2L	2391346	2391556	chr2L	2391346	2391556	mdg3	226	5251	16	210	6-10	68.62	19	0.8	intergenic	CG43750
49	chr2L	2454956	2455186	chr2L	2454956	2455186	ZAM	7968	459	18	230	9-9	70.37	19	0.9	intron	dpp
50	chr2L	2456053	2456167	chr2L	2456053	2456167	springer	7154	285	9	114	2-7	81.04	1	4.5	intron	dpp
51	chr2L	2703373	2703622	chr2L	2703373	2703622	412	9	491	37	249	14-23	63.96	2	12.3333	intron	CG31690
52	chr2L	2717270	2717427	chr2L	2717270	2717427	mdg3	74	247	13	157	10-3	75.33	0	13	intron	CG31690
53	chr2L	2803852	2804086	chr2L	2803852	2804086	ZAM	7962	457	10	234	8-2	70.73	11	0.833333	intergenic	daw
54	chr2L	2806102	2806327	chr2L	2806102	2806327	ZAM	8410	7962	14	225	9-5	78.29	0	14	intron	daw
55	chr2L	2901886	2902110	chr2L	2901886	2902110	ZAM	7961	446	23	224	19-4	70.32	3	5.75	intron	lilli
56	chr2L	2904762	2904991	chr2L	2904762	2904991	Tirant	8496	8103	27	229	10-17	66.52	0	27	intron	lilli
57	chr2L	2918004	2918104	chr2L	2918004	2918104	297	395	295	5	100	3-2	81.07	0	5	intron	lilli
58	chr2L	3002295	3002520	chr2L	3002295	3002520	ZAM	7961	447	28	225	20-8	70.19	6	4	intron	CG17265
59	chr2L	3008958	3009195	chr2L	3008958	3009195	ZAM	458	7960	32	237	14-18	72.75	12	2.46154	intron	CG17265
60	chr2L	3018114	3018271	chr2L	3018114	3018271	Juan	4209	38	9	157	2-7	68.96	3	2.25	intron	CG17224
61	chr2L	3099603	3099817	chr2L	3099603	3099817	ZAM	447	10	15	214	6-9	69.11	6	2.14286	intron	toc
62	chr2L	3193341	3193575	chr2L	3193341	3193575	ZAM	7960	455	15	234	8-7	75.73	22	0.652174	intron	CG34393
63	chr2L	3214729	3214914	chr2L	3214729	3214914	mdg3	5255	205	25	185	16-9	68.35	2	8.33333	intergenic	not near genes
64	chr2L	3233593	3233794	chr2L	3233593	3233794	412	7530	12	24	201	10-14	66.95	5	4	intergenic	not near genes
65	chr2L	3298880	3298940	chr2L	3298880	3298940	I-element	5316	5256	4	60	3-1	64.5	0	4	intron	CG9663
66	chr2L	3345287	3345446	chr2L	3345287	3345446	springer	26	7476	16	159	9-7	71.17	7	2	intron	E23
67	chr2L	3393749	3393972	chr2L	3393749	3393972	ZAM	455	7971	29	223	14-15	68.51	19	1.45	intergenic	not near genes
68	chr2L	3394951	3395189	chr2L	3394951	3395189	springer	387	5	21	238	10-11	64.32	0	21	intergenic	not near genes
69	chr2L	3394980	3395196	chr2L	3394980	3395196	gypsy6	359	7417	4	216	3-1	71.34	1	2	intergenic	not near genes
70	chr2L	3457568	3457761	chr2L	3457568	3457761	ZAM	41	457	26	193	10-16	75.51	11	2.16667	intron	sec5
71	chr2L	3553041	3553231	chr2L	3553041	3553231	ZAM	456	43	23	190	15-8	69.45	0	23	intergenic	not near genes
72	chr2L	3634525	3634683	chr2L	3634525	3634683	ZAM	2	8343	15	158	9-6	71.24	13	1.07143	intron	for
73	chr2L	3698814	3699034	chr2L	3698814	3699034	mdg3	236	5251	27	220	12-15	66.07	4	5.4	intron	CG10031
74	chr2L	3720586	3720755	chr2L	3720586	3720755	ZAM	8354	7964	27	169	9-18	68.79	2	9	intron	Shaw
75	chr2L	3762905	3762995	chr2L	3762905	3762995	jockey	15	106	15	90	3-12	66.53	0	15	intron	CG43707
76	chr2L	3786994	3787213	chr2L	3786994	3787213	ZAM	8410	6	31	219	10-21	68.43	18	1.63158	intergenic	bowl
77	chr2L	3923242	3923417	chr2L	3923242	3923417	ZAM	445	47	14	175	8-6	71.81	11	1.16667	intron	fred
78	chr2L	3963957	3964173	chr2L	3963957	3964173	ZAM	444	5	18	216	2-16	70	11	1.5	intron	fred
79	chr2L	3975710	3975861	chr2L	3975710	3975861	ZAM	370	7958	31	151	10-21	70.28	7	3.875	intron	fred
80	chr2L	3979477	3979711	chr2L	3979477	3979711	ZAM	458	7963	19	234	7-12	72.56	15	1.1875	intron	fred
81	chr2L	4019935	4020034	chr2L	4019935	4020034	jockey	4777	4674	15	99	6-9	66.04	0	15	intergenic	not near genes
82	chr2L	4058389	4058583	chr2L	4058389	4058583	copia	234	4882	7	194	2-5	71.33	16	0.411765	intron	ed
83	chr2L	4080676	4080912	chr2L	4080676	4080912	ZAM	456	7959	36	236	18-18	72.35	42	0.837209	intron	ed
84	chr2L	4181012	4181215	chr2L	4181012	4181215	Transpac	4922	286	26	203	15-11	67.95	10	2.36364	intergenic	not near genes
85	chr2L	4218997	4219205	chr2L	4218997	4219205	mdg3	5251	5476	30	208	18-12	67.78	0	30	intron	ft
86	chr2L	4246797	4247028	chr2L	4246797	4247028	ZAM	457	7965	34	231	15-19	71.67	11	2.83333	intron	CR44059
87	chr2L	4248447	4248712	chr2L	4248447	4248712	ZAM	455	8403	17	265	5-12	73.33	37	0.447368	intron	CR44059
88	chr2L	4252953	4253285	chr2L	4252953	4253285	ZAM	8200	7960	31	332	5-26	73.03	27	1.10714	intergenic	not near genes
89	chr2L	4302216	4302434	chr2L	4302216	4302434	roo	8666	400	16	218	10-6	75.67	21	0.727273	intron	tutl
90	chr2L	4308567	4308805	chr2L	4308567	4308805	ZAM	7960	459	22	238	10-12	68.12	16	1.29412	intron	tutl
91	chr2L	4310402	4310594	chr2L	4310402	4310594	ZAM	44	457	33	192	24-9	68.32	4	6.6	intron	tutl
92	chr2L	4326408	4326552	chr2L	4326408	4326552	ZAM	374	7971	25	144	9-16	66.48	4	5	intron	CG16857
93	chr2L	4403928	4404146	chr2L	4403928	4404146	roo	411	13	13	218	6-7	75.08	11	1.08333	3` UTR	Dim1
94	chr2L	4438206	4438360	chr2L	4438206	4438360	jockey	4945	20	13	154	7-6	64.97	19	0.65	intron	CG15431
95	chr2L	4746683	4746875	chr2L	4746683	4746875	pogo	2062	1	14	192	5-9	68.48	17	0.777778	intron	CG15630
96	chr2L	4856281	4856505	chr2L	4856281	4856505	mdg3	5493	5252	18	224	5-13	64.93	26	0.666667	intron	pog
97	chr2L	4896279	4896500	chr2L	4896279	4896500	mdg3	250	5264	26	221	11-15	71.33	12	2	intron	CG3036
98	chr2L	4932626	4932854	chr2L	4932626	4932854	mdg3	5252	245	27	228	18-9	72.91	2	9	intergenic	hoe2
99	chr2L	4956239	4956474	chr2L	4956239	4956474	mdg3	252	5252	27	235	8-19	68.17	26	1	exon	Marcal1
100	chr2L	4971816	4972040	chr2L	4971816	4972040	ZAM	8408	7961	43	224	10-33	65.5	18	2.26316	intron	l(2)05714
101	chr2L	5044436	5044667	chr2L	5044436	5044667	ZAM	455	1	27	231	13-14	73.28	24	1.08	5` UTR	CG33995
102	chr2L	5069087	5069309	chr2L	5069087	5069309	ZAM	7963	8408	31	222	24-7	70.39	8	3.44444	intron	qtc
103	chr2L	5083077	5083306	chr2L	5083077	5083306	ZAM	7961	8413	41	229	30-11	71.58	16	2.41176	intron	pgant5
104	chr2L	5108453	5108666	chr2L	5108453	5108666	ZAM	6	442	23	213	15-8	69.04	14	1.53333	intron	Msp-300
105	chr2L	5111316	5111539	chr2L	5111316	5111539	412	7543	4	26	223	10-16	74.44	6	3.71429	intron	Msp-300
106	chr2L	5211429	5211502	chr2L	5211429	5211502	F-element	89	16	10	73	2-8	63.6	0	10	exon	Cyp28d1
107	chr2L	5218820	5218969	chr2L	5218820	5218969	ZAM	454	8044	17	149	7-10	76.43	5	2.83333	exon	TpnC25D
108	chr2L	5250349	5250548	chr2L	5250349	5250548	mdg3	5472	5256	23	199	4-19	69.83	13	1.64286	intron	tkv
109	chr2L	5262898	5263123	chr2L	5262898	5263123	ZAM	7972	458	28	225	22-6	68.05	25	1.07692	intron	tkv
110	chr2L	5289129	5289356	chr2L	5289129	5289356	ZAM	7970	458	12	227	8-4	70	15	0.75	intergenic	not near genes
111	chr2L	5337929	5338162	chr2L	5337929	5338162	ZAM	454	7960	31	233	9-22	67.27	14	2.06667	intergenic	fusl
112	chr2L	5339036	5339257	chr2L	5339036	5339257	mdg3	5257	243	16	221	7-9	69.54	0	16	intergenic	fusl
113	chr2L	5354347	5354555	chr2L	5354347	5354555	ZAM	7977	446	21	208	15-6	70.13	26	0.777778	intron	nompC
114	chr2L	5508287	5508521	chr2L	5508287	5508521	ZAM	7961	456	37	234	22-15	69.78	18	1.94737	intergenic	not near genes
115	chr2L	5590500	5590730	chr2L	5590500	5590730	mdg3	5250	233	42	230	29-13	72.06	20	2	intergenic	CG7251
116	chr2L	5632955	5633137	chr2L	5632955	5633137	ZAM	8	8374	47	182	33-14	66.85	10	4.27273	exon	CG31646
117	chr2L	5656717	5656929	chr2L	5656717	5656929	ZAM	7962	8398	31	212	24-7	68.9	46	0.659574	intron	CG31646
118	chr2L	5697275	5697488	chr2L	5697275	5697488	copia	253	11	8	213	3-5	74.09	8	0.888889	intergenic	not near genes
119	chr2L	5705465	5705570	chr2L	5705465	5705570	Doc	106	1	11	105	6-5	76.42	8	1.22222	intergenic	CG7236
120	chr2L	5724241	5724448	chr2L	5724241	5724448	1360	3378	9	9	207	3-6	65.18	4	1.8	intergenic	sip1
121	chr2L	5732817	5733019	chr2L	5732817	5733019	3S18	5771	6079	11	202	6-5	65.64	5	1.83333	intron	CG11030
122	chr2L	5739424	5739644	chr2L	5739424	5739644	ZAM	7964	447	40	220	32-8	69.17	25	1.53846	intron	CG11030
123	chr2L	5780786	5781012	chr2L	5780786	5781012	mdg3	249	5258	39	226	17-22	69.56	17	2.16667	intron	CG9171
124	chr2L	5786688	5786897	chr2L	5786688	5786897	ZAM	7969	439	18	209	12-6	64.48	1	9	intron	CG9171
125	chr2L	5788803	5789025	chr2L	5788803	5789025	roo	405	3	33	222	14-19	72.55	14	2.2	intron	CG9171
126	chr2L	5888037	5888247	chr2L	5888037	5888247	I-element	9	5348	9	210	3-6	74.22	4	1.8	intergenic	CG43185
127	chr2L	5891284	5891500	chr2L	5891284	5891500	springer	7155	7525	28	216	15-13	66.88	15	1.75	intergenic	Acp26Ab
128	chr2L	5894585	5894809	chr2L	5894585	5894809	ZAM	7970	455	26	224	18-8	69.23	0	26	intergenic	Acp26Ab
129	chr2L	6024223	6024432	chr2L	6024223	6024432	gypsy	11	7439	33	209	18-15	63.84	5	5.5	exon	CG9107
130	chr2L	6031229	6031459	chr2L	6031229	6031459	ZAM	453	7962	65	230	19-46	70.56	24	2.6	intron	CG9109
131	chr2L	6085158	6085304	chr2L	6085158	6085304	FB	11	55	8	146	4-4	66.41	0	8	intergenic	not near genes
132	chr2L	6166995	6167220	chr2L	6166995	6167220	ZAM	8411	7962	21	225	4-17	70.6	37	0.552632	intergenic	not near genes
133	chr2L	6247051	6247234	chr2L	6247051	6247234	Juan	4195	17	11	183	5-6	68.49	6	1.57143	intergenic	not near genes
134	chr2L	6251017	6251249	chr2L	6251017	6251249	copia	4868	258	16	232	11-5	72.58	15	1	intergenic	Ddr
135	chr2L	6251590	6251757	chr2L	6251590	6251757	mdg3	5260	5444	17	167	13-4	67.96	6	2.42857	intergenic	Ddr
136	chr2L	6256693	6256908	chr2L	6256693	6256908	roo	407	12	14	215	6-8	75	26	0.518519	intron	Ddr
137	chr2L	6265720	6265943	chr2L	6265720	6265943	mdg3	5254	242	42	223	27-15	70.56	9	4.2	intron	Ddr
138	chr2L	6359248	6359325	chr2L	6359248	6359325	Doc	23	99	9	77	5-4	68.67	0	9	intergenic	ppk14
139	chr2L	6377711	6377873	chr2L	6377711	6377873	mdg3	15	5445	33	162	15-18	70.69	3	8.25	intergenic	slam
140	chr2L	6473027	6473188	chr2L	6473027	6473188	Juan	4180	17	8	161	3-5	64.33	1	4	intron	mmy
141	chr2L	6523382	6523564	chr2L	6523382	6523564	I-element	32	5341	4	182	3-1	67.84	12	0.307692	intron	CG31637
142	chr2L	6532031	6532260	chr2L	6532031	6532260	ZAM	457	7966	22	229	6-16	73.06	27	0.785714	intron	eya
143	chr2L	6533727	6533963	chr2L	6533727	6533963	ZAM	7960	457	24	236	12-12	71.81	45	0.521739	intron	eya
144	chr2L	6581695	6581823	chr2L	6581695	6581823	ZAM	8311	7962	18	128	10-8	70.81	14	1.2	intron	CG11319
145	chr2L	6583277	6583487	chr2L	6583277	6583487	hopper	11	16	8	210	7-1	71.75	1	4	intron	CG11319
146	chr2L	6603115	6603340	chr2L	6603115	6603340	412	495	5	31	225	12-19	69.78	6	4.42857	intergenic	CG11319
147	chr2L	6613759	6613957	chr2L	6613759	6613957	412	7532	7070	14	198	6-8	68.57	8	1.55556	intron	CG11050
148	chr2L	6752656	6752742	chr2L	6752656	6752742	F-element	374	460	16	86	5-11	67.67	0	16	intron	CG11221
149	chr2L	6757398	6757624	chr2L	6757398	6757624	ZAM	3	459	32	226	23-9	70.62	0	32	intergenic	CG11221
150	chr2L	6827367	6827592	chr2L	6827367	6827592	roo	11	409	17	225	4-13	68.67	0	17	intron	sens-2
151	chr2L	6987895	6988126	chr2L	6987895	6988126	ZAM	7960	452	51	231	34-17	71.6	3	12.75	intron	uif
152	chr2L	7049347	7049520	chr2L	7049347	7049520	diver	5932	213	7	173	3-4	69.52	0	7	intron	milt
153	chr2L	7061180	7061359	chr2L	7061180	7061359	ZAM	8012	453	29	179	16-13	70.64	15	1.8125	exon	Mnn1
154	chr2L	7088235	7088424	chr2L	7088235	7088424	rover	6950	305	16	189	15-1	67.46	6	2.28571	intergenic	not near genes
155	chr2L	7195604	7195840	chr2L	7195604	7195840	ZAM	458	7961	63	236	21-42	71.43	19	3.15	exon	CG4502
156	chr2L	7202202	7202412	chr2L	7202202	7202412	S-element	1712	1701	14	210	7-7	65.14	6	2	intron	CG4502
157	chr2L	7363313	7363426	chr2L	7363313	7363426	ZAM	8012	8347	11	113	7-4	68.24	3	2.75	intergenic	Wnt10
158	chr2L	7381051	7381264	chr2L	7381051	7381264	ZAM	437	1	25	213	9-16	68.08	9	2.5	intron	ninaC
159	chr2L	7404006	7404224	chr2L	7404006	7404224	ZAM	8414	7973	7	218	3-4	80.86	9	0.7	exon	CG5171
160	chr2L	7454028	7454241	chr2L	7454028	7454241	ZAM	8410	7974	21	213	5-16	71.33	5	3.5	exon	Gr28a
161	chr2L	7472896	7473010	chr2L	7472896	7473010	springer	7438	33	13	114	10-3	76.36	1	6.5	3` UTR	CG42533
162	chr2L	7489519	7489701	chr2L	7489519	7489701	pogo	2062	12	10	182	7-3	69.73	0	10	intron	CG42533
163	chr2L	7532672	7532898	chr2L	7532672	7532898	mdg3	5254	5497	20	226	16-4	69.43	0	20	intron	Rapgap1
164	chr2L	7677328	7677518	chr2L	7677328	7677518	diver	2	188	16	190	4-12	70.46	10	1.45455	intron	Myo28B1
165	chr2L	7832787	7832995	chr2L	7832787	7832995	ZAM	433	7965	15	208	6-9	72.58	0	15	intergenic	mts
166	chr2L	7871418	7871655	chr2L	7871418	7871655	ZAM	7962	454	15	237	6-9	70.67	0	15	5` UTR	Proct
167	chr2L	8009176	8009381	chr2L	8009176	8009381	1360	3374	7	27	205	14-13	68.44	8	3	exon	CG12560
168	chr2L	8026624	8026811	chr2L	8026624	8026811	ZAM	453	43	16	187	8-8	68.5	0	16	exon	Tg
169	chr2L	8071649	8071744	chr2L	8071649	8071744	Quasimodo	1	96	5	95	2-3	72.93	0	5	intergenic	poe
170	chr2L	8074929	8075164	chr2L	8074929	8075164	ZAM	7961	457	35	235	23-12	68.08	21	1.59091	3` UTR	Mcr
171	chr2L	8089784	8089981	chr2L	8089784	8089981	copia	4886	241	7	197	2-5	67.05	3	1.75	intron	Bsg
172	chr2L	8158845	8159045	chr2L	8158845	8159045	opus	6	474	21	200	4-17	71.62	0	21	intron	CG8552
173	chr2L	8171937	8172143	chr2L	8171937	8172143	mdg3	5495	20	22	206	12-10	70.3	1	11	intron	Piezo
174	chr2L	8205375	8205584	chr2L	8205375	8205584	P-element	2878	2879	23	209	12-11	54.12	11	1.91667	3` UTR	CR44120
175	chr2L	8252622	8252825	chr2L	8252622	8252825	ZAM	439	7975	12	203	7-5	72.06	4	2.4	exon	CG8086
176	chr2L	8445572	8445710	chr2L	8445572	8445710	roo	9034	53	9	138	4-5	70.96	0	9	exon	CG31897
177	chr2L	8477224	8477391	chr2L	8477224	8477391	I-element	5301	9	10	167	4-6	68.2	5	1.66667	intron	d
178	chr2L	8481347	8481445	chr2L	8481347	8481445	jockey	4771	4673	8	98	2-6	73.75	0	8	intron	d
179	chr2L	8500115	8500330	chr2L	8500115	8500330	ZAM	7960	436	23	215	18-5	69.1	10	2.09091	intron	Dh31
180	chr2L	8530587	8530773	chr2L	8530587	8530773	springer	7503	26	17	186	9-8	70	0	17	intron	CG17834
181	chr2L	8550071	8550276	chr2L	8550071	8550276	roo	400	13	13	205	5-8	69.08	5	2.16667	intron	Sema-1a
182	chr2L	8584379	8584560	chr2L	8584379	8584560	springer	360	23	15	181	6-9	58.49	0	15	intron	Sema-1a
183	chr2L	8588389	8588555	chr2L	8588389	8588555	jockey	63	4985	26	166	11-15	69.56	7	3.25	intron	Sema-1a
184	chr2L	8602811	8603040	chr2L	8602811	8603040	ZAM	5	457	19	229	7-12	71.05	12	1.46154	intron	Sema-1a
185	chr2L	8613107	8613326	chr2L	8613107	8613326	ZAM	2	8408	16	219	10-6	68.58	0	16	intron	Sema-1a
186	chr2L	8627797	8627874	chr2L	8627797	8627874	F-element	112	36	5	77	2-3	69.74	0	5	intron	Sema-1a
187	chr2L	8657630	8657842	chr2L	8657630	8657842	ZAM	456	7982	20	212	11-9	71.03	0	20	intron	Sema-1a
188	chr2L	8713594	8713757	chr2L	8713594	8713757	412	7528	48	11	163	6-5	69.15	1	5.5	intron	raw
189	chr2L	8713871	8714093	chr2L	8713871	8714093	blood	7373	7010	18	222	2-16	73.63	0	18	intron	raw
190	chr2L	8777079	8777147	chr2L	8777079	8777147	G4	3720	3806	4	68	3-1	71	0	4	intergenic	CG9466
191	chr2L	8801550	8801756	chr2L	8801550	8801756	ZAM	7985	8414	13	206	8-5	70.72	8	1.44444	intergenic	not near genes
192	chr2L	8853655	8853868	chr2L	8853655	8853868	copia	4869	240	16	213	13-3	70.46	12	1.23077	intergenic	not near genes
193	chr2L	8878844	8879049	chr2L	8878844	8879049	mdg3	5257	5479	21	205	17-4	69.97	7	2.625	intergenic	not near genes
194	chr2L	8898644	8898870	chr2L	8898644	8898870	ZAM	456	7969	35	226	15-20	69.26	7	4.375	intergenic	CG34398
195	chr2L	8899733	8899914	chr2L	8899733	8899914	springer	7160	7495	23	181	11-12	67.77	9	2.3	intron	CG34398
196	chr2L	8987503	8987688	chr2L	8987503	8987688	ZAM	441	7995	16	185	7-9	69.79	5	2.66667	intron	rost
197	chr2L	8992543	8992767	chr2L	8992543	8992767	pogo	2	2093	29	224	18-11	65.59	0	29	intron	CG9555
198	chr2L	9081629	9081830	chr2L	9081629	9081830	ZAM	7968	8392	13	201	12-1	69.69	6	1.85714	intergenic	Toll-4
199	chr2L	9190123	9190350	chr2L	9190123	9190350	springer	380	7136	24	227	6-18	68.5	23	1	intron	tai
200	chr2L	9227628	9227828	chr2L	9227628	9227828	roo	9067	22	12	200	9-3	62.33	8	1.33333	intron	tai
201	chr2L	9299994	9300218	chr2L	9299994	9300218	hobo	1	2938	17	224	5-12	68.82	12	1.30769	intergenic	not near genes
202	chr2L	9310505	9310720	chr2L	9310505	9310720	ZAM	454	16	21	215	9-12	71.33	4	4.2	intergenic	not near genes
203	chr2L	9331709	9331919	chr2L	9331709	9331919	3S18	5766	323	13	210	8-5	66.82	8	1.44444	3` UTR	Cks30A
204	chr2L	9379493	9379700	chr2L	9379493	9379700	mdg3	5250	5474	16	207	5-11	66.54	0	16	intron	Shawl
205	chr2L	9427001	9427068	chr2L	9427001	9427068	Doc	35	102	10	67	7-3	63.6	0	10	exon	Fbp2
206	chr2L	9485270	9485437	chr2L	9485270	9485437	hobo	6	2886	19	167	10-9	67.58	18	1	intergenic	not near genes
207	chr2L	9487122	9487214	chr2L	9487122	9487214	jockey	4	97	7	92	3-4	72	1	3.5	intergenic	not near genes
208	chr2L	9507248	9507416	chr2L	9507248	9507416	springer	363	50	8	168	4-4	67.17	3	2	intron	CG33298
209	chr2L	9526411	9526606	chr2L	9526411	9526606	springer	7505	19	15	195	7-8	63.29	16	0.882353	intron	Oatp30B
210	chr2L	9597196	9597427	chr2L	9597196	9597427	ZAM	7964	456	28	231	16-12	70.5	20	1.33333	intergenic	CG4382
211	chr2L	9616946	9617177	chr2L	9616946	9617177	ZAM	8414	7960	21	231	5-16	70	3	5.25	intron	GlcAT-S
212	chr2L	9656447	9656669	chr2L	9656447	9656669	mdg3	5493	5254	25	222	10-15	69.92	21	1.13636	intergenic	CG15828
213	chr2L	9666780	9667014	chr2L	9666780	9667014	ZAM	7960	455	22	234	12-10	71.18	7	2.75	intergenic	not near genes
214	chr2L	9694718	9694807	chr2L	9694718	9694807	ZAM	8058	7	11	89	4-7	68.24	0	11	intron	Pka-C1
215	chr2L	9702580	9702802	chr2L	9702580	9702802	ZAM	7962	445	25	222	19-6	71.89	6	3.57143	intron	pelo
216	chr2L	9743418	9743642	chr2L	9743418	9743642	ZAM	456	7971	22	224	8-14	69.27	7	2.75	5` UTR	Nckx30C
217	chr2L	9848247	9848472	chr2L	9848247	9848472	412	5	495	23	225	14-9	73.39	16	1.35294	intron	nAcRalpha-30D
218	chr2L	9874320	9874501	chr2L	9874320	9874501	roo	358	8662	16	181	6-10	73.13	2	5.33333	intron	nAcRalpha-30D
219	chr2L	9995743	9995949	chr2L	9995743	9995949	roo	8681	408	14	206	10-4	70	0	14	3` UTR	CG31875
220	chr2L	10071854	10072077	chr2L	10071854	10072077	ZAM	7969	453	23	223	12-11	73.56	11	1.91667	intron	CG44153
221	chr2L	10089847	10090070	chr2L	10089847	10090070	ZAM	7968	8414	16	223	9-7	70.37	11	1.33333	intron	CG44153
222	chr2L	10100860	10101092	chr2L	10100860	10101092	ZAM	1	456	22	232	10-12	69.67	8	2.44444	intron	CG44153
223	chr2L	10143632	10143857	chr2L	10143632	10143857	ZAM	456	7	20	225	11-9	72.13	6	2.85714	intron	CG44153
224	chr2L	10180780	10180937	chr2L	10180780	10180937	Transpac	296	4979	14	157	8-6	64.33	5	2.33333	intergenic	CG44153
225	chr2L	10198770	10198956	chr2L	10198770	10198956	springer	7156	361	26	186	17-9	64.28	0	26	5` UTR	Sur
226	chr2L	10373909	10374003	chr2L	10373909	10374003	Dm88	170	76	11	94	3-8	67.27	3	2.75	3` UTR	CG33303
227	chr2L	10377074	10377271	chr2L	10377074	10377271	pogo	15	2081	7	197	2-5	63.9	7	0.875	intron	dpr19
228	chr2L	10554284	10554481	chr2L	10554284	10554481	Tabor	10	7302	5	197	2-3	72.13	1	2.5	intron	Trim9
229	chr2L	10570157	10570375	chr2L	10570157	10570375	ZAM	444	7966	26	218	4-22	71.9	1	13	intron	Trim9
230	chr2L	10572646	10572723	chr2L	10572646	10572723	F-element	109	32	4	77	1-3	64.5	0	4	intron	Trim9
231	chr2L	10600827	10600998	chr2L	10600827	10600998	mdg1	7408	7	9	171	5-4	69.19	8	1	intron	Trim9
232	chr2L	10606620	10606810	chr2L	10606620	10606810	ZAM	458	44	31	190	11-20	70.45	9	3.1	intron	Trim9
233	chr2L	10615578	10615744	chr2L	10615578	10615744	ZAM	391	4	19	166	7-12	68.46	3	4.75	intron	Trim9
234	chr2L	10633047	10633145	chr2L	10633047	10633145	ZAM	452	8314	9	98	4-5	69.33	2	3	intron	CG7329
235	chr2L	10708508	10708740	chr2L	10708508	10708740	ZAM	457	2	18	232	8-10	71.04	15	1.125	intergenic	Lip2
236	chr2L	10775617	10775838	chr2L	10775617	10775838	ZAM	7964	446	27	221	21-6	68.1	11	2.25	exon	CG31869
237	chr2L	10781159	10781261	chr2L	10781159	10781261	ZAM	2	104	15	102	5-10	69.42	0	15	intron	CG31869
238	chr2L	10894529	10894751	chr2L	10894529	10894751	412	3	489	22	222	10-12	75.76	11	1.83333	intergenic	not near genes
239	chr2L	10937200	10937299	chr2L	10937200	10937299	springer	7449	7184	4	99	1-3	63.33	0	4	intron	dpr2
240	chr2L	10942234	10942429	chr2L	10942234	10942429	pogo	2090	26	12	195	6-6	66.05	0	12	intron	dpr2
241	chr2L	10995172	10995373	chr2L	10995172	10995373	mdg3	31	249	16	201	9-7	65.58	2	5.33333	intron	CG16833
242	chr2L	11050325	11050443	chr2L	11050325	11050443	ZAM	22	8323	4	118	3-1	65.34	3	1	intron	Samuel
243	chr2L	11190674	11190850	chr2L	11190674	11190850	mdg3	198	5250	17	176	4-13	64.98	8	1.88889	intron	Ca-beta
244	chr2L	11236735	11236859	chr2L	11236735	11236859	ZAM	349	7966	21	124	6-15	66.29	8	2.33333	exon	ab
245	chr2L	11250280	11250485	chr2L	11250280	11250485	hopper	5	16	5	205	3-2	68	20	0.238095	intron	ab
246	chr2L	11290871	11291086	chr2L	11290871	11291086	ZAM	8412	7974	24	215	11-13	71.28	2	8	3` UTR	CR43409
247	chr2L	11311805	11312019	chr2L	11311805	11312019	ZAM	440	7965	18	214	3-15	69.82	6	2.57143	intergenic	not near genes
248	chr2L	11319061	11319250	chr2L	11319061	11319250	ZAM	7963	412	17	189	12-5	70.82	5	2.83333	intergenic	not near genes
249	chr2L	11381946	11382037	chr2L	11381946	11382037	opus	7093	7115	6	91	4-2	72.78	0	6	intergenic	not near genes
250	chr2L	11598421	11598643	chr2L	11598421	11598643	ZAM	7960	8405	29	222	21-8	69.68	16	1.70588	intergenic	not near genes
251	chr2L	11607282	11607518	chr2L	11607282	11607518	ZAM	450	7960	24	236	7-17	72.5	2	8	intron	kek2
252	chr2L	11643656	11643876	chr2L	11643656	11643876	ZAM	8401	7958	32	220	6-26	71.58	25	1.23077	intergenic	CG6614
253	chr2L	11654778	11654996	chr2L	11654778	11654996	ZAM	8413	10	23	218	8-15	65.25	4	4.6	intergenic	CG12307
254	chr2L	11658969	11659183	chr2L	11658969	11659183	297	380	6	5	214	2-3	70.8	4	1	intergenic	CG43167
255	chr2L	11689742	11689969	chr2L	11689742	11689969	ZAM	7962	8412	21	227	14-7	74.79	17	1.16667	intergenic	not near genes
256	chr2L	11701586	11701815	chr2L	11701586	11701815	ZAM	453	7963	31	229	16-15	70.99	12	2.38462	intergenic	not near genes
257	chr2L	11728389	11728507	chr2L	11728389	11728507	roo	8685	8982	9	118	5-4	72.67	0	9	intergenic	not near genes
258	chr2L	11773514	11773703	chr2L	11773514	11773703	Burdock	229	6151	22	189	10-12	70	12	1.69231	intergenic	not near genes
259	chr2L	11815031	11815102	chr2L	11815031	11815102	Quasimodo	78	7	7	71	3-4	70.38	0	7	3` UTR	Pde1c
260	chr2L	11815351	11815568	chr2L	11815351	11815568	mdg3	5485	5251	23	217	11-12	69.68	7	2.875	3` UTR	Pde1c
261	chr2L	11882600	11882741	chr2L	11882600	11882741	roo	347	26	4	141	2-2	69.67	0	4	intron	Pde1c
262	chr2L	11901564	11901755	chr2L	11901564	11901755	springer	7155	363	17	191	10-7	68.31	2	5.66667	intron	Pde1c
263	chr2L	11918305	11918401	chr2L	11918305	11918401	Doc	100	4	16	96	6-10	64.29	3	4	intron	Pde1c
264	chr2L	11950501	11950727	chr2L	11950501	11950727	Transpac	3	5227	13	226	3-10	71.74	0	13	intergenic	CG16964
265	chr2L	12043750	12043970	chr2L	12043750	12043970	gypsy	1	453	18	220	12-6	68.44	12	1.38462	5` UTR	CG6785
266	chr2L	12124226	12124459	chr2L	12124226	12124459	ZAM	7960	454	28	233	17-11	67.86	19	1.4	intron	CG17211
267	chr2L	12237560	12237783	chr2L	12237560	12237783	mdg3	243	5254	23	223	7-16	65.33	4	4.6	intergenic	not near genes
268	chr2L	12247383	12247608	chr2L	12247383	12247608	springer	381	2	20	225	8-12	73.37	9	2	intergenic	not near genes
269	chr2L	12254213	12254445	chr2L	12254213	12254445	ZAM	454	7961	28	232	8-20	68	8	3.11111	intergenic	not near genes
270	chr2L	12258399	12258588	chr2L	12258399	12258588	ZAM	454	41	19	189	8-11	64.7	9	1.9	intergenic	not near genes
271	chr2L	12307437	12307622	chr2L	12307437	12307622	flea	219	4758	14	185	2-12	66.29	2	4.66667	intron	aret
272	chr2L	12359172	12359402	chr2L	12359172	12359402	ZAM	453	7964	8	230	4-4	73.75	3	2	intron	bru-2
273	chr2L	12360320	12360532	chr2L	12360320	12360532	pogo	2085	4	17	212	9-8	63.49	6	2.42857	intron	bru-2
274	chr2L	12449955	12450182	chr2L	12449955	12450182	ZAM	7964	8412	24	227	18-6	67.22	32	0.727273	exon	Oatp33Eb
275	chr2L	12509820	12509991	chr2L	12509820	12509991	ZAM	8355	7963	22	171	7-15	69.7	2	7.33333	intron	bun
276	chr2L	12511488	12511667	chr2L	12511488	12511667	copia	30	236	8	179	6-2	67.67	8	0.888889	intron	bun
277	chr2L	12517113	12517270	chr2L	12517113	12517270	ZAM	7964	8342	19	157	11-8	72.67	5	3.16667	exon	bun
278	chr2L	12522481	12522652	chr2L	12522481	12522652	roo	9029	11	10	171	6-4	69.67	6	1.42857	intron	bun
279	chr2L	12528507	12528720	chr2L	12528507	12528720	copia	11	251	14	213	11-3	70.33	11	1.16667	intron	bun
280	chr2L	12648778	12648933	chr2L	12648778	12648933	ZAM	376	7962	15	155	8-7	75.25	0	15	intergenic	Ref2
281	chr2L	12692203	12692369	chr2L	12692203	12692369	1360	11	3339	13	166	10-3	64	4	2.6	exon	CG5525
282	chr2L	12754274	12754377	chr2L	12754274	12754377	Quasimodo	7145	7248	20	103	9-11	69.8	5	3.33333	intergenic	not near genes
283	chr2L	12777629	12777836	chr2L	12777629	12777836	Burdock	6385	6153	20	207	9-11	70.5	4	4	intergenic	not near genes
284	chr2L	12809513	12809644	chr2L	12809513	12809644	ZAM	8342	7991	11	131	2-9	62	0	11	intergenic	CR43818
285	chr2L	12813549	12813753	chr2L	12813549	12813753	gypsy6	7417	358	5	204	2-3	72.4	14	0.333333	intergenic	not near genes
286	chr2L	12813578	12813741	chr2L	12813578	12813741	springer	7164	345	20	163	14-6	67.4	7	2.5	intergenic	not near genes
287	chr2L	12881038	12881246	chr2L	12881038	12881246	gypsy	7002	459	29	208	18-11	68.55	21	1.31818	intergenic	not near genes
288	chr2L	12892711	12892878	chr2L	12892711	12892878	ZAM	389	7963	16	167	9-7	67.21	11	1.33333	intergenic	not near genes
289	chr2L	12928280	12928493	chr2L	12928280	12928493	ZAM	7973	8409	29	213	20-9	68.85	6	4.14286	exon	ACXE
290	chr2L	13057520	13057745	chr2L	13057520	13057745	ZAM	446	7960	28	225	9-19	65.38	13	2	intron	CG9932
291	chr2L	13081784	13081996	chr2L	13081784	13081996	ZAM	8395	7960	23	212	10-13	65.68	8	2.55556	intergenic	not near genes
292	chr2L	13112910	13113086	chr2L	13112910	13113086	mdg1	7416	10	9	176	7-2	65.63	3	2.25	intergenic	not near genes
293	chr2L	13118697	13118852	chr2L	13118697	13118852	Tabor	58	7308	9	155	5-4	67.33	5	1.5	intergenic	CR44198
294	chr2L	13144035	13144263	chr2L	13144035	13144263	ZAM	8411	7961	20	228	5-15	65.37	3	5	intergenic	CG9928
295	chr2L	13146703	13146936	chr2L	13146703	13146936	ZAM	7962	456	28	233	20-8	68.5	10	2.54545	5` UTR	CR44199
296	chr2L	13154218	13154317	chr2L	13154218	13154317	roo	8760	9033	5	99	4-1	76.53	0	5	intergenic	not near genes
297	chr2L	13182647	13182849	chr2L	13182647	13182849	pogo	2082	11	10	202	5-5	67.47	0	10	intron	CG5287
298	chr2L	13234693	13235101	chr2L	13234693	13235101	ZAM	455	8395	45	408	18-27	67.67	27	1.60714	intergenic	Prosalpha6T
299	chr2L	13257465	13257598	chr2L	13257465	13257598	Juan	4139	15	4	133	3-1	68.17	0	4	intergenic	CG31728
300	chr2L	13262146	13262371	chr2L	13262146	13262371	ZAM	444	7960	14	225	3-11	67.48	4	2.8	intron	CG44085
301	chr2L	13294346	13294554	chr2L	13294346	13294554	pogo	2099	22	10	208	6-4	71.6	3	2.5	intron	CG31729
302	chr2L	13323388	13323615	chr2L	13323388	13323615	hobo	2708	8	18	227	9-9	68.44	0	18	intron	CG43778
303	chr2L	13367564	13367770	chr2L	13367564	13367770	Juan	4197	3	13	206	5-8	70.92	6	1.85714	intergenic	Nnp-1
304	chr2L	13418973	13419197	chr2L	13418973	13419197	ZAM	7965	8412	21	224	11-10	70.29	20	1	intron	CG42784
305	chr2L	13430364	13430469	chr2L	13430364	13430469	Doc	7	112	11	105	6-5	66.24	1	5.5	intron	CG42784
306	chr2L	13457599	13457811	chr2L	13457599	13457811	ZAM	8395	7960	37	212	6-31	70.47	23	1.54167	intron	CG42784
307	chr2L	13543150	13543383	chr2L	13543150	13543383	ZAM	457	7963	35	233	9-26	70.32	22	1.52174	intron	B4
308	chr2L	13595370	13595517	chr2L	13595370	13595517	mdg3	208	44	14	147	9-5	67.19	2	4.66667	intron	kuz
309	chr2L	13602700	13602876	chr2L	13602700	13602876	hobo	30	2919	14	176	6-8	65.05	9	1.4	intron	kuz
310	chr2L	13627906	13628131	chr2L	13627906	13628131	ZAM	458	10	17	225	4-13	71.06	13	1.21429	intron	kuz
311	chr2L	13727786	13728004	chr2L	13727786	13728004	roo	8670	404	25	218	16-9	70.61	11	2.08333	intergenic	not near genes
312	chr2L	13834365	13834583	chr2L	13834365	13834583	ZAM	8407	7966	32	218	9-23	69.17	24	1.28	exon	mRpS23
313	chr2L	13843680	13843769	chr2L	13843680	13843769	FB	12	101	5	89	3-2	73.2	1	2.5	intron	cenG1A
314	chr2L	13908798	13909051	chr2L	13908798	13909051	ZAM	8408	8395	19	253	11-8	71.93	16	1.11765	intron	Ance
315	chr2L	13916772	13916988	chr2L	13916772	13916988	pogo	2100	15	15	216	10-5	65.38	0	15	exon	Ance-3
316	chr2L	13932025	13932086	chr2L	13932025	13932086	jockey	4899	4961	4	61	2-2	66.5	0	4	intron	Ance-3
317	chr2L	13977340	13977520	chr2L	13977340	13977520	mdg1	7073	7445	8	180	5-3	69.58	9	0.8	5` UTR	Cyp28a5
318	chr2L	14013899	14014115	chr2L	14013899	14014115	ZAM	7969	446	22	216	15-7	67.24	11	1.83333	5` UTR	bgm
319	chr2L	14019895	14020124	chr2L	14019895	14020124	ZAM	7960	450	34	229	23-11	70.02	40	0.829268	exon	nimC3
320	chr2L	14068521	14068761	chr2L	14068521	14068761	ZAM	7957	457	19	240	17-2	71.4	0	19	intron	nAcRalpha-34E
321	chr2L	14159268	14159409	chr2L	14159268	14159409	Juan	44	4202	5	141	3-2	66.67	2	1.66667	3` UTR	CG17341
322	chr2L	14220401	14220598	chr2L	14220401	14220598	copia	9	233	15	197	12-3	65.91	7	1.875	intron	smi35A
323	chr2L	14223395	14223569	chr2L	14223395	14223569	copia	35	236	12	174	6-6	62.28	6	1.71429	intron	smi35A
324	chr2L	14279025	14279172	chr2L	14279025	14279172	copia	178	3	6	147	3-3	76.55	1	3	intron	wb
325	chr2L	14300905	14301475	chr2L	14300905	14301475	ZAM	12	7964	47	570	13-34	70.42	54	0.854545	intron	wb
326	chr2L	14322645	14322874	chr2L	14322645	14322874	ZAM	7962	452	30	229	15-15	70.47	23	1.25	exon	wb
327	chr2L	14330579	14330753	chr2L	14330579	14330753	ZAM	8019	454	22	174	11-11	68.61	8	2.44444	exon	ms(2)34Fe
328	chr2L	14422354	14422563	chr2L	14422354	14422563	ZAM	453	7983	22	209	8-14	68.33	2	7.33333	intergenic	Cpr35B
329	chr2L	14465496	14465600	chr2L	14465496	14465600	opus	7499	7395	22	104	9-13	70.3	0	22	intergenic	not near genes
330	chr2L	14498369	14498598	chr2L	14498369	14498598	copia	2	259	7	229	4-3	79.71	9	0.7	intergenic	not near genes
331	chr2L	14534196	14534411	chr2L	14534196	14534411	ZAM	9	8409	22	215	16-6	67.94	9	2.2	intergenic	not near genes
332	chr2L	14542335	14542519	chr2L	14542335	14542519	copia	242	31	11	184	3-8	69.88	2	3.66667	intergenic	not near genes
333	chr2L	14549144	14549348	chr2L	14549144	14549348	springer	387	7166	14	204	10-4	64.95	15	0.875	intergenic	CG4218
334	chr2L	14553867	14554079	chr2L	14553867	14554079	gypsy	463	19	19	212	11-8	69.89	8	2.11111	intergenic	not near genes
335	chr2L	14562766	14562982	chr2L	14562766	14562982	ZAM	447	7963	26	216	9-17	65.26	2	8.66667	intergenic	CG3473
336	chr2L	14688999	14689196	chr2L	14688999	14689196	ZAM	456	36	11	197	2-9	68.18	2	3.66667	5` UTR	osp
337	chr2L	14759229	14759403	chr2L	14759229	14759403	mdg3	28	219	11	174	10-1	64.55	0	11	intergenic	CG4691
338	chr2L	14774519	14774741	chr2L	14774519	14774741	Burdock	6382	6135	18	222	9-9	70.07	5	3	exon	CG4650
339	chr2L	14863736	14863963	chr2L	14863736	14863963	297	395	6585	16	227	9-7	71.54	13	1.14286	intergenic	not near genes
340	chr2L	14963411	14963559	chr2L	14963411	14963559	opus	7478	59	10	148	5-5	72.47	0	10	intron	CG42313
341	chr2L	14969562	14969770	chr2L	14969562	14969770	roo	8670	394	13	208	10-3	73.44	0	13	intron	CG42313
342	chr2L	15104922	15105071	chr2L	15104922	15105071	Burdock	6361	6187	13	149	4-9	69.38	2	4.33333	intergenic	not near genes
343	chr2L	15168922	15169080	chr2L	15168922	15169080	Stalker2	360	28	17	158	5-12	68.82	0	17	intron	CG4168
344	chr2L	15185174	15185412	chr2L	15185174	15185412	ZAM	7957	456	23	238	15-8	70.49	13	1.64286	intron	CG4168
345	chr2L	15388593	15388821	chr2L	15388593	15388821	ZAM	456	5	21	228	6-15	67.78	16	1.23529	intergenic	not near genes
346	chr2L	15391239	15391475	chr2L	15391239	15391475	ZAM	7963	454	44	236	31-13	71.36	5	7.33333	intergenic	not near genes
347	chr2L	15392144	15392376	chr2L	15392144	15392376	ZAM	7964	457	25	232	16-9	74.19	16	1.47059	intergenic	not near genes
348	chr2L	15410151	15410339	chr2L	15410151	15410339	Juan	4	4214	14	188	5-9	59.29	12	1.07692	intergenic	not near genes
349	chr2L	15410649	15410882	chr2L	15410649	15410882	ZAM	7962	456	20	233	12-8	69.7	15	1.25	intergenic	not near genes
350	chr2L	15427466	15427633	chr2L	15427466	15427633	springer	7479	21	15	167	6-9	65.42	2	5	intergenic	wor
351	chr2L	15440915	15441145	chr2L	15440915	15441145	ZAM	456	7960	20	230	8-12	71.07	3	5	intergenic	not near genes
352	chr2L	15529530	15529746	chr2L	15529530	15529746	pogo	9	2094	25	216	11-14	63.39	19	1.25	intergenic	not near genes
353	chr2L	15551599	15551833	chr2L	15551599	15551833	ZAM	7962	457	29	234	17-12	68.21	34	0.828571	3` UTR	CG15256
354	chr2L	15569951	15570149	chr2L	15569951	15570149	springer	7150	365	21	198	10-11	73.3	17	1.16667	intron	kek3
355	chr2L	15618480	15618649	chr2L	15618480	15618649	Burdock	220	26	17	169	9-8	69.37	15	1.0625	intergenic	CG15253
356	chr2L	15735419	15735593	chr2L	15735419	15735593	ZAM	7999	436	12	174	7-5	64.67	0	12	intron	CycE
357	chr2L	15807226	15807300	chr2L	15807226	15807300	F-element	31	105	7	74	4-3	66.29	0	7	intergenic	not near genes
358	chr2L	15894484	15894693	chr2L	15894484	15894693	BS	5079	5071	4	209	2-2	77.83	5	0.666667	intergenic	Tep1
359	chr2L	15905935	15906141	chr2L	15905935	15906141	ZAM	7976	443	18	206	10-8	66.7	1	9	intron	beat-Ib
360	chr2L	15963369	15963554	chr2L	15963369	15963554	springer	7499	7160	23	185	8-15	69.3	11	1.91667	intergenic	beat-Ib
361	chr2L	15973928	15974158	chr2L	15973928	15974158	ZAM	454	1	20	230	7-13	71.37	8	2.22222	intergenic	not near genes
362	chr2L	15993597	15993762	chr2L	15993597	15993762	mdg3	74	205	15	165	10-5	65.96	0	15	intergenic	not near genes
363	chr2L	16056821	16056982	chr2L	16056821	16056982	roo	13	353	10	161	6-4	70.2	4	2	intron	beat-Ia
364	chr2L	16069578	16069796	chr2L	16069578	16069796	ZAM	454	13	17	218	8-9	73.14	12	1.30769	intron	beat-Ia
365	chr2L	16089272	16089490	chr2L	16089272	16089490	copia	255	4879	8	218	3-5	70.17	5	1.33333	intergenic	not near genes
366	chr2L	16153205	16153275	chr2L	16153205	16153275	Doc	3	66	5	70	1-4	62.4	0	5	intergenic	not near genes
367	chr2L	16234866	16235085	chr2L	16234866	16235085	ZAM	452	10	29	219	3-26	67.01	15	1.8125	intron	CG42817
368	chr2L	16273707	16273781	chr2L	16273707	16273781	F-element	261	335	12	74	6-6	55.78	0	12	intron	crp
369	chr2L	16275480	16275631	chr2L	16275480	16275631	ZAM	7961	371	29	151	13-16	73.43	5	4.83333	intron	crp
370	chr2L	16446863	16447079	chr2L	16446863	16447079	mdg3	5251	232	14	216	10-4	66.38	0	14	intron	CG5888
371	chr2L	16457101	16457301	chr2L	16457101	16457301	copia	4894	252	8	200	5-3	66.67	11	0.666667	intergenic	not near genes
372	chr2L	16497982	16498204	chr2L	16497982	16498204	ZAM	4	8414	10	222	8-2	73.2	0	10	intron	Tpr2
373	chr2L	16529164	16529347	chr2L	16529164	16529347	mdg3	5454	5254	18	183	7-11	66.96	2	6	intron	CG5953
374	chr2L	16544911	16545096	chr2L	16544911	16545096	ZAM	7966	411	15	185	11-4	67.82	10	1.36364	intergenic	CG31816
375	chr2L	16650524	16650747	chr2L	16650524	16650747	mdg3	245	5257	11	223	3-8	72.48	5	1.83333	intron	CG42389
376	chr2L	16710211	16710417	chr2L	16710211	16710417	springer	7501	7141	28	206	10-18	69.07	15	1.75	intron	CG31808
377	chr2L	16884748	16884965	chr2L	16884748	16884965	pogo	4	2096	15	217	9-6	63.6	3	3.75	intron	CG31743
378	chr2L	16886420	16886573	chr2L	16886420	16886573	ZAM	8351	7977	22	153	9-13	68.42	0	22	intergenic	CG31743
379	chr2L	16917607	16917824	chr2L	16917607	16917824	ZAM	8399	7960	12	217	5-7	71.17	0	12	intergenic	tweek
380	chr2L	16999237	16999462	chr2L	16999237	16999462	roo	2	406	8	225	5-3	69.58	10	0.727273	intergenic	not near genes
381	chr2L	17022654	17022725	chr2L	17022654	17022725	F-element	105	34	8	71	5-3	63	0	8	intergenic	not near genes
382	chr2L	17066575	17066787	chr2L	17066575	17066787	mdg1	419	7053	6	212	5-1	73.78	5	1	intergenic	not near genes
383	chr2L	17136252	17136343	chr2L	17136252	17136343	BS	4887	4796	13	91	10-3	67.03	0	13	intron	beat-IIIa
384	chr2L	17161195	17161422	chr2L	17161195	17161422	ZAM	7963	8413	16	227	9-7	73.38	10	1.45455	intron	beat-IIIa
385	chr2L	17238235	17238328	chr2L	17238235	17238328	Doc	106	13	10	93	6-4	76.6	2	3.33333	intron	beat-IIIc
386	chr2L	17264630	17264832	chr2L	17264630	17264832	412	7069	482	14	202	11-3	66.19	0	14	intergenic	not near genes
387	chr2L	17270644	17270860	chr2L	17270644	17270860	ZAM	8400	7961	12	216	5-7	70.05	7	1.5	intergenic	not near genes
388	chr2L	17280585	17280803	chr2L	17280585	17280803	ZAM	8407	7966	21	218	6-15	67.93	8	2.33333	intergenic	not near genes
389	chr2L	17387219	17387423	chr2L	17387219	17387423	roo	8675	9067	11	204	8-3	64.55	4	2.2	intron	CLIP-190
390	chr2L	17406751	17406865	chr2L	17406751	17406865	flea	4682	39	35	114	19-16	72.42	0	35	exon	CLIP-190
391	chr2L	17448124	17448335	chr2L	17448124	17448335	FB	7	7	9	211	6-3	67.7	10	0.818182	intron	dl
392	chr2L	17465954	17466022	chr2L	17465954	17466022	ZAM	393	325	7	68	1-6	77.81	0	7	intron	BicD
393	chr2L	17466478	17466586	chr2L	17466478	17466586	ZAM	8076	6	10	108	2-8	72.53	2	3.33333	intron	BicD
394	chr2L	17493076	17493268	chr2L	17493076	17493268	ZAM	430	7989	19	192	10-9	64.91	15	1.1875	intron	qua
395	chr2L	17515875	17516076	chr2L	17515875	17516076	springer	346	7138	11	201	4-7	60.67	0	11	intron	Dhc36C
396	chr2L	17545766	17545925	chr2L	17545766	17545925	17.6	7403	56	6	159	2-4	68.55	6	0.857143	intergenic	not near genes
397	chr2L	17623413	17623603	chr2L	17623413	17623603	mdg3	5490	31	18	190	7-11	64.96	13	1.28571	intergenic	CG15147
398	chr2L	17633630	17633812	chr2L	17633630	17633812	copia	4915	255	5	182	1-4	67.47	2	1.66667	intergenic	not near genes
399	chr2L	17636965	17637186	chr2L	17636965	17637186	ZAM	10	8408	34	221	19-15	66.61	0	34	intergenic	not near genes
400	chr2L	17650744	17650819	chr2L	17650744	17650819	jockey	20	96	8	75	2-6	64.08	0	8	intron	CadN
401	chr2L	17730418	17730584	chr2L	17730418	17730584	pogo	2042	18	7	166	2-5	71.14	4	1.4	intron	CadN
402	chr2L	17806169	17806320	chr2L	17806169	17806320	ZAM	8348	7976	13	151	4-9	65.59	3	3.25	intron	CadN2
403	chr2L	17815734	17815958	chr2L	17815734	17815958	ZAM	454	7	20	224	5-15	65.67	14	1.33333	intron	CadN2
404	chr2L	17835454	17835682	chr2L	17835454	17835682	ZAM	7962	7964	35	228	19-16	73.37	2	11.6667	intron	CadN2
405	chr2L	17896134	17896356	chr2L	17896134	17896356	roo	408	6	13	222	8-5	63.85	11	1.08333	intergenic	CR43420
406	chr2L	17919782	17920008	chr2L	17919782	17920008	ZAM	7958	8407	14	226	5-9	69.43	19	0.7	intergenic	CR43274
407	chr2L	17997331	17997543	chr2L	17997331	17997543	mdg3	16	5497	16	212	12-4	71.84	2	5.33333	intergenic	not near genes
408	chr2L	18033965	18034177	chr2L	18033965	18034177	ZAM	13	8410	19	212	10-9	70.7	5	3.16667	intron	rdo
409	chr2L	18061520	18061751	chr2L	18061520	18061751	ZAM	7960	452	18	231	8-10	73.37	4	3.6	intron	rdo
410	chr2L	18135355	18135507	chr2L	18135355	18135507	Quasimodo	7308	19	11	152	4-7	73.39	8	1.22222	intron	kel
411	chr2L	18148641	18148830	chr2L	18148641	18148830	springer	15	7507	11	189	6-5	69.58	11	0.916667	intron	Socs36E
412	chr2L	18162892	18163120	chr2L	18162892	18163120	mdg3	248	5257	24	228	9-15	69.67	10	2.18182	intron	CG42750
413	chr2L	18213996	18214092	chr2L	18213996	18214092	jockey	4677	4773	13	96	8-5	67.18	0	13	intron	CG42750
414	chr2L	18231746	18231872	chr2L	18231746	18231872	roo	66	9035	9	126	3-6	64.89	1	4.5	intron	CG42750
415	chr2L	18237586	18237756	chr2L	18237586	18237756	springer	7503	42	16	170	6-10	67.25	4	3.2	intron	CG42750
416	chr2L	18239404	18239621	chr2L	18239404	18239621	ZAM	6	446	14	217	8-6	72.28	5	2.33333	intron	CG42750
417	chr2L	18242559	18242792	chr2L	18242559	18242792	ZAM	455	7961	19	233	10-9	68.7	18	1	intron	CG42750
418	chr2L	18270679	18270745	chr2L	18270679	18270745	F-element	11	76	8	66	2-6	62.67	0	8	intron	CG42750
419	chr2L	18338989	18339140	chr2L	18338989	18339140	mdg3	5329	5497	9	151	6-3	76.67	8	1	intron	Fas3
420	chr2L	18340678	18340887	chr2L	18340678	18340887	ZAM	8410	7978	33	209	15-18	69.27	16	1.94118	intron	Fas3
421	chr2L	18361043	18361265	chr2L	18361043	18361265	roo	3	405	20	222	12-8	67.7	0	20	intron	Fas3
422	chr2L	18362252	18362411	chr2L	18362252	18362411	ZAM	8351	7971	17	159	5-12	66.86	2	5.66667	intron	Fas3
423	chr2L	18376577	18376779	chr2L	18376577	18376779	springer	7517	7161	23	202	12-11	68.2	1	11.5	intron	Fas3
424	chr2L	18381417	18381590	chr2L	18381417	18381590	springer	7	339	17	173	9-8	73.53	4	3.4	intron	Fas3
425	chr2L	18436620	18436695	chr2L	18436620	18436695	Doc	13	88	6	75	3-3	58.78	0	6	intergenic	not near genes
426	chr2L	18439603	18439810	chr2L	18439603	18439810	ZAM	456	26	20	207	9-11	70.77	13	1.42857	intergenic	RpS26
427	chr2L	18497155	18497382	chr2L	18497155	18497382	ZAM	7962	450	18	227	12-6	71.89	15	1.125	intron	kon
428	chr2L	18513023	18513211	chr2L	18513023	18513211	ZAM	453	8003	23	188	13-10	72.61	13	1.64286	exon	CG10178
429	chr2L	18537918	18538135	chr2L	18537918	18538135	mdg3	5486	5252	41	217	21-20	71.76	7	5.125	intron	Pde11
430	chr2L	18545599	18545837	chr2L	18545599	18545837	mdg3	5497	5255	32	238	16-16	62.81	6	4.57143	intron	Pde11
431	chr2L	18570436	18570625	chr2L	18570436	18570625	FB	31	5	10	189	5-5	67.13	0	10	intron	Pde11
432	chr2L	18589058	18589146	chr2L	18589058	18589146	F-element	16	112	8	88	3-5	65.92	1	4	intergenic	CG15160
433	chr2L	18623990	18624174	chr2L	18623990	18624174	roo	8669	9032	14	184	10-4	67.38	4	2.8	intron	MESR3
434	chr2L	18670250	18670450	chr2L	18670250	18670450	ZAM	15	438	24	200	15-9	67.78	12	1.84615	intron	CG43338
435	chr2L	18702889	18703119	chr2L	18702889	18703119	ZAM	457	3	27	230	18-9	71.53	13	1.92857	exon	CG10376
436	chr2L	18749679	18749767	chr2L	18749679	18749767	copia	4869	4957	11	88	6-5	67.45	1	5.5	intergenic	not near genes
437	chr2L	18879182	18879256	chr2L	18879182	18879256	Juan	67	4163	5	74	2-3	66.4	0	5	intron	tup
438	chr2L	18879257	18879496	chr2L	18879257	18879496	ZAM	452	7962	20	239	1-19	68.7	13	1.42857	intron	tup
439	chr2L	18887514	18887658	chr2L	18887514	18887658	mdg3	212	5303	6	144	5-1	63.44	2	2	intergenic	not near genes
440	chr2L	18893063	18893271	chr2L	18893063	18893271	mdg3	234	5259	18	208	6-12	70.19	0	18	intergenic	not near genes
441	chr2L	18927682	18927910	chr2L	18927682	18927910	pogo	2100	2	12	228	6-6	66.72	2	4	intron	ssp3
442	chr2L	19037571	19037799	chr2L	19037571	19037799	gypsy	463	3	21	228	8-13	67.49	23	0.875	intron	mib2
443	chr2L	19108868	19109099	chr2L	19108868	19109099	ZAM	453	7961	34	231	13-21	70.27	20	1.61905	intergenic	Lim3
444	chr2L	19143930	19144101	chr2L	19143930	19144101	ZAM	8410	8006	8	171	1-7	66.59	2	2.66667	intron	brat
445	chr2L	19246029	19246245	chr2L	19246029	19246245	ZAM	7965	8404	16	216	14-2	69.54	13	1.14286	intergenic	not near genes
446	chr2L	19320392	19320589	chr2L	19320392	19320589	Juan	4198	6	6	197	2-4	73	0	6	intergenic	not near genes
447	chr2L	19357961	19358169	chr2L	19357961	19358169	springer	1	363	19	208	11-8	68	7	2.375	intron	dnt
448	chr2L	19371243	19371321	chr2L	19371243	19371321	Bari1	30	107	13	78	3-10	73.03	0	13	exon	CG17349
449	chr2L	19372097	19372190	chr2L	19372097	19372190	Bari1	1611	1704	12	93	9-3	65.33	1	6	intron	CG17349
450	chr2L	19393711	19393929	chr2L	19393711	19393929	ZAM	8400	7959	36	218	11-25	70.5	0	36	intron	CG17544
451	chr2L	19394248	19394479	chr2L	19394248	19394479	ZAM	4	458	26	231	14-12	69.49	35	0.722222	exon	CG31798
452	chr2L	19398217	19398441	chr2L	19398217	19398441	gypsy	7448	6993	41	224	16-25	69.03	4	8.2	intergenic	CG31798
453	chr2L	19421937	19422164	chr2L	19421937	19422164	copia	254	4869	9	227	2-7	71.33	29	0.3	intron	Pax
454	chr2L	19428981	19429199	chr2L	19428981	19429199	roo	8662	397	17	218	12-5	70.16	6	2.42857	intron	CG13085
455	chr2L	19466778	19466851	chr2L	19466778	19466851	mdg3	167	5493	6	73	2-4	69.89	0	6	3` UTR	tj
456	chr2L	19471612	19471821	chr2L	19471612	19471821	gypsy	7433	6992	20	209	11-9	68.83	27	0.714286	3` UTR	CR43839
457	chr2L	19599809	19600024	chr2L	19599809	19600024	hobo	2930	2	24	215	14-10	68.67	0	24	intergenic	not near genes
458	chr2L	19642335	19642441	chr2L	19642335	19642441	springer	275	7152	7	106	3-4	70.86	2	2.33333	intron	Lar
459	chr2L	19768920	19769145	chr2L	19768920	19769145	ZAM	7971	457	28	225	17-11	71.74	15	1.75	exon	bsh
460	chr2L	19789527	19789741	chr2L	19789527	19789741	Burdock	6150	6389	21	214	12-9	66.7	22	0.913043	intron	CdGAPr
461	chr2L	19800973	19801054	chr2L	19800973	19801054	Doc	102	20	7	81	2-5	65.24	0	7	intron	sick
462	chr2L	19820167	19820278	chr2L	19820167	19820278	ZAM	7960	109	14	111	5-9	71.52	0	14	intron	sick
463	chr2L	19834444	19834601	chr2L	19834444	19834601	roo	8675	9010	7	157	4-3	65.62	0	7	intron	sick
464	chr2L	19835229	19835425	chr2L	19835229	19835425	diver	5915	179	6	196	3-3	64.66	0	6	intron	sick
465	chr2L	19848401	19848622	chr2L	19848401	19848622	roo	410	9	23	221	12-11	70.73	20	1.09524	intron	sick
466	chr2L	19953077	19953166	chr2L	19953077	19953166	Doc	97	8	12	89	6-6	70.83	0	12	intron	sick
467	chr2L	19995068	19995242	chr2L	19995068	19995242	Juan	4099	4185	4	174	2-2	67.5	0	4	intron	CG43861
468	chr2L	20041649	20041740	chr2L	20041649	20041740	Doc	11	102	17	91	8-9	70.24	0	17	intron	sNPF
469	chr2L	20043874	20044099	chr2L	20043874	20044099	ZAM	450	2	19	225	2-17	70.21	0	19	intron	sNPF
470	chr2L	20081144	20081234	chr2L	20081144	20081234	F-element	112	22	8	90	4-4	65.5	1	4	intron	neb
471	chr2L	20090903	20091134	chr2L	20090903	20091134	ZAM	454	7962	28	231	11-17	69.4	12	2.15385	exon	CG10747
472	chr2L	20230960	20231093	chr2L	20230960	20231093	hopper	21	1340	9	133	3-6	69.11	0	9	intergenic	not near genes
473	chr2L	20250599	20250807	chr2L	20250599	20250807	ZAM	8411	7980	15	208	7-8	72	6	2.14286	intergenic	CG40341
474	chr2L	20254784	20254997	chr2L	20254784	20254997	hobo	5	2931	28	213	13-15	71.14	5	4.66667	intergenic	CR40465
475	chr2L	20264515	20264736	chr2L	20264515	20264736	copia	4868	247	14	221	12-2	72.09	1	7	intergenic	CG17570
476	chr2L	20291742	20291970	chr2L	20291742	20291970	412	494	8	19	228	7-12	68.63	11	1.58333	intergenic	CG12617
477	chr2L	20392704	20392883	chr2L	20392704	20392883	roo	19	9041	15	179	10-5	65.51	14	1	intron	CG10947
478	chr2L	20394092	20394280	chr2L	20394092	20394280	ZAM	8375	7965	18	188	2-16	63.63	7	2.25	intron	CG10947
479	chr2L	20493963	20494136	chr2L	20493963	20494136	412	52	7542	16	173	10-6	72.88	2	5.33333	intergenic	CG34007
480	chr2L	20498214	20498341	chr2L	20498214	20498341	F-element	4586	11	11	127	5-6	70.91	0	11	intergenic	CG34007
481	chr2L	20571084	20571297	chr2L	20571084	20571297	297	6581	6958	20	213	15-5	71.5	23	0.833333	intergenic	not near genes
482	chr2L	20595901	20596054	chr2L	20595901	20596054	ZAM	411	8000	11	153	1-10	62.79	0	11	intergenic	not near genes
483	chr2L	20601707	20601903	chr2L	20601707	20601903	flea	250	4785	5	196	1-4	67.73	1	2.5	intergenic	CG31677
484	chr2L	20623007	20623167	chr2L	20623007	20623167	ZAM	8348	5	27	160	9-18	68.4	0	27	intergenic	not near genes
485	chr2L	20631608	20631806	chr2L	20631608	20631806	roo	8677	391	16	198	6-10	69	11	1.33333	intergenic	CG17472
486	chr2L	20642026	20642102	chr2L	20642026	20642102	roo	9041	8972	6	76	5-1	65.89	0	6	intergenic	CG31680
487	chr2L	20666855	20667063	chr2L	20666855	20667063	roo	17	405	11	208	5-6	68.79	11	0.916667	intron	CG31678
488	chr2L	20706757	20706951	chr2L	20706757	20706951	ZAM	459	8004	16	194	6-10	66.5	14	1.06667	intron	Hr38
489	chr2L	20713898	20714125	chr2L	20713898	20714125	ZAM	4	454	32	227	23-9	69.88	8	3.55556	5` UTR	Hr38
490	chr2L	20721599	20721819	chr2L	20721599	20721819	mdg1	2	414	18	220	9-9	68.3	0	18	intergenic	CG9316
491	chr2L	20749982	20750187	chr2L	20749982	20750187	Juan	4205	7	10	205	8-2	73.13	11	0.833333	3` UTR	Fs(2)Ket
492	chr2L	20792945	20793125	chr2L	20792945	20793125	springer	7491	20	15	180	6-9	65.42	7	1.875	intron	vari
493	chr2L	20794034	20794191	chr2L	20794034	20794191	ZAM	381	7965	22	157	7-15	66.97	7	2.75	intron	vari
494	chr2L	20794274	20794485	chr2L	20794274	20794485	springer	2	367	20	211	6-14	70.07	4	4	intron	vari
495	chr2L	20797417	20797489	chr2L	20797417	20797489	jockey	4681	4753	4	72	2-2	68.33	0	4	intergenic	vari
496	chr2L	20856486	20856695	chr2L	20856486	20856695	ZAM	3	8397	28	209	24-4	68.43	19	1.4	exon	CG9335
497	chr2L	20964776	20964976	chr2L	20964776	20964976	mdg3	5260	225	6	200	3-3	70.34	12	0.461538	intergenic	CG42238
498	chr2L	20967303	20967443	chr2L	20967303	20967443	springer	322	7165	17	140	6-11	67.53	2	5.66667	3` UTR	CG42238
499	chr2L	21000788	21001003	chr2L	21000788	21001003	Tirant	8125	400	13	215	4-9	71.28	13	0.928571	intron	CG42238
500	chr2L	21001661	21001877	chr2L	21001661	21001877	mdg3	5252	233	22	216	17-5	70.24	12	1.69231	intron	CG42238
501	chr2L	21037518	21037656	chr2L	21037518	21037656	springer	2	294	12	138	7-5	73.78	1	6	intron	CG42238
502	chr2L	21051133	21051340	chr2L	21051133	21051340	1360	8	3377	13	207	8-5	64.31	11	1.08333	5` UTR	CG42238
503	chr2L	21051553	21051678	chr2L	21051553	21051678	ZAM	8058	8406	4	125	3-1	80.16	0	4	intron	CG42238
504	chr2L	21133054	21133204	chr2L	21133054	21133204	mdg3	225	5310	12	150	3-9	70.17	2	4	intergenic	Nhe2
505	chr2L	21195580	21195731	chr2L	21195580	21195731	ZAM	8349	7975	11	151	5-6	66.55	4	2.2	intron	Ret
506	chr2L	21250552	21250764	chr2L	21250552	21250764	297	1	377	12	212	8-4	72.44	12	0.923077	intron	Hr39
507	chr2L	21276626	21276842	chr2L	21276626	21276842	1360	2	3381	23	216	16-7	68.32	10	2.09091	intron	CG8671
508	chr2L	21277371	21277619	chr2L	21277371	21277619	mdg3	247	5265	24	248	13-11	69.31	24	0.96	exon	CG8671
509	chr2L	21297121	21297329	chr2L	21297121	21297329	roo	8673	398	15	208	8-7	64.09	6	2.14286	intron	Mio
510	chr2L	21298287	21298382	chr2L	21298287	21298382	copia	5040	4918	7	95	2-5	67.52	0	7	intron	Mio
511	chr2L	21314045	21314235	chr2L	21314045	21314235	I-element	25	5343	5	190	2-3	67.6	3	1.25	intron	crc
512	chr2L	21325068	21325135	chr2L	21325068	21325135	invader4	286	219	10	67	6-4	73.8	0	10	intergenic	CG42696
513	chr2L	21360342	21360557	chr2L	21360342	21360557	HMS-Beagle2	7183	3	13	215	7-6	64.61	6	1.85714	intergenic	Tsp39D
514	chr2L	21403536	21403611	chr2L	21403536	21403611	G5	4467	4392	16	75	10-6	60.88	0	16	intergenic	not near genes
515	chr2L	21570225	21570303	chr2L	21570225	21570303	Dm88	105	27	9	78	5-4	67.18	0	9	intergenic	not near genes
516	chr2L	21606640	21606718	chr2L	21606640	21606718	mdg3	159	237	13	78	7-6	67.85	0	13	intergenic	not near genes
517	chr2L	21745301	21745509	chr2L	21745301	21745509	Juan	9	4208	4	208	2-2	73.34	4	0.8	intron	step
518	chr2L	21768122	21768262	chr2L	21768122	21768262	ZAM	7965	8326	23	140	12-11	69.83	8	2.55556	intron	CG31612
519	chr2L	21802954	21803023	chr2L	21802954	21803023	Burdock	6213	8	6	69	4-2	63.67	0	6	intergenic	not near genes
520	chr2L	21863719	21863880	chr2L	21863719	21863880	ZAM	29	8374	24	161	19-5	64.56	3	6	intergenic	not near genes
521	chr2L	21882070	21882297	chr2L	21882070	21882297	ZAM	458	7970	47	227	22-25	68.98	0	47	intergenic	not near genes
522	chr2L	21895919	21896135	chr2L	21895919	21896135	ZAM	7961	8400	15	216	10-5	66.84	6	2.14286	intergenic	CR43762
523	chr2L	21904997	21905194	chr2L	21904997	21905194	copia	242	4887	7	197	1-6	67.91	1	3.5	intergenic	CG1421
524	chr2L	21928994	21929259	chr2L	21928994	21929259	opus	494	7284	15	265	14-1	67.47	0	15	intergenic	not near genes
525	chr2L	22038697	22038908	chr2L	22038697	22038908	mdg3	248	5272	22	211	9-13	73.27	7	2.75	exon	CG41434
526	chr2L	22058773	22058934	chr2L	22058773	22058934	roo	66	407	10	161	4-6	68.6	2	3.33333	intergenic	not near genes
527	chr2L	22078399	22078471	chr2L	22078399	22078471	Doc	86	14	8	72	4-4	60.58	0	8	intergenic	ttm3
528	chr2L	22079508	22079713	chr2L	22079508	22079713	gtwin	14	7380	10	205	1-9	64.4	1	5	intergenic	ttm3
529	chr2L	22099228	22099436	chr2L	22099228	22099436	ZAM	450	7981	20	208	9-11	71.2	15	1.25	intergenic	not near genes
530	chr2L	22181148	22181210	chr2L	22181148	22181210	R1A1-element	5156	5218	6	62	2-4	62.33	0	6	intron	CG3635
531	chr2L	22224500	22224626	chr2L	22224500	22224626	Rt1c	5342	5417	5	126	2-3	74	1	2.5	intergenic	not near genes
532	chr2L	22243357	22243522	chr2L	22243357	22243522	412	6	7489	7	165	6-1	65.71	5	1.16667	intergenic	CG3262
533	chr2L	22312552	22312739	chr2L	22312552	22312739	springer	7149	361	12	187	7-5	63.56	1	6	intron	CG17018
534	chr2L	22350050	22350133	chr2L	22350050	22350133	1360	112	29	7	83	3-4	68.67	1	3.5	intron	CG17018
535	chr2L	22369156	22369292	chr2L	22369156	22369292	flea	4832	4996	8	136	6-2	75.25	0	8	intergenic	CG17018
536	chr2L	22424919	22425048	chr2L	22532187	22532316	gypsy6	7486	7771	15	129	10-5	67.73	5	2.5	intergenic	RpL5
537	chr2L	22424977	22425053	chr2L	22532245	22532321	springer	7419	7493	19	76	10-9	62.07	0	19	intergenic	RpL5
538	chr2L	22451295	22451519	chr2L	22558563	22558787	opus	7114	7500	26	224	16-10	71.26	8	2.88889	intergenic	not near genes
539	chr2L	22528363	22528594	chr2L	22635631	22635862	Rt1a	5074	448	4	231	1-3	80	22	0.173913	intron	CG40006
540	chr2L	22538782	22538974	chr2L	22646050	22646242	Stalker4	40	412	8	192	4-4	69.58	21	0.363636	intron	CG40006
541	chr2L	22538808	22538888	chr2L	22646076	22646156	Stalker	66	7175	8	80	5-3	71.83	0	8	intron	CG40006
542	chr2L	22678094	22678313	chr2L	22785362	22785581	pogo	4	2092	8	219	2-6	71.83	9	0.8	intergenic	not near genes
543	chr2L	22693454	22693687	chr2L	22800722	22800955	ZAM	455	7961	24	233	5-19	70.42	8	2.66667	intergenic	CG40439
544	chr2L	22740352	22740523	chr2L	22847620	22847791	1360	53	3	13	171	8-5	65.95	4	2.6	intron	CG17715
545	chr2L	22961511	22961725	chr2L	23068779	23068993	1360	2	11	32	214	15-17	68.56	1	16	intergenic	Spf45
546	chr2R	185450	185619	chr2R	4297945	4298114	ZAM	7962	457	25	169	10-15	69.76	54	0.454545	intergenic	not near genes
547	chr2R	561057	561158	chr2R	4673552	4673653	Quasimodo	7315	30	4	101	3-1	59	0	4	3` UTR	CG17883
548	chr2R	676257	676550	chr2R	4788752	4789045	297	6946	6932	4	293	3-1	61.33	11	0.333333	intergenic	CG12547
549	chr2R	708499	708601	chr2R	4820994	4821096	pogo	2071	2035	8	102	5-3	70.08	0	8	intron	CG17528
550	chr2R	712865	713040	chr2R	4825360	4825535	17.6	7402	38	11	175	9-2	68.24	0	11	intergenic	CG17528
551	chr2R	742344	742496	chr2R	4854839	4854991	copia	4932	245	4	152	2-2	70.34	17	0.222222	intergenic	not near genes
552	chr2R	804353	804583	chr2R	4916848	4917078	ZAM	7962	453	15	230	8-7	67.29	8	1.66667	intergenic	Ir41a
553	chr2R	805474	805668	chr2R	4917969	4918163	springer	10	7495	11	194	7-4	67.88	7	1.375	exon	Ir41a
554	chr2R	821207	821424	chr2R	4933702	4933919	412	7537	2	24	217	11-13	67.06	25	0.923077	intron	Ir41a
555	chr2R	874643	874793	chr2R	4987138	4987288	Juan	4165	23	8	150	5-3	67.17	2	2.66667	intron	Ir41a
556	chr2R	958413	958523	chr2R	5070908	5071018	Tirant	5	8240	4	110	1-3	55.83	0	4	intergenic	TpnC41C
557	chr2R	960083	960241	chr2R	5072578	5072736	ZAM	8374	32	10	158	3-7	61.67	0	10	intergenic	TpnC41C
558	chr2R	1143850	1144061	chr2R	5256345	5256556	mdg3	230	5254	27	211	9-18	69.65	1	13.5	intergenic	CR41443
559	chr2R	1152654	1152737	chr2R	5265149	5265232	Q-element	503	420	9	83	5-4	61.33	0	9	intron	d4
560	chr2R	1184237	1184320	chr2R	5296732	5296815	INE-1	14	105	5	83	1-4	65.07	0	5	intergenic	d4
561	chr2R	1196326	1196571	chr2R	5308821	5309066	hopper	1	1387	13	245	11-2	71.8	11	1.08333	intron	sxc
562	chr2R	1215943	1216092	chr2R	5328438	5328587	roo	330	8666	9	149	6-3	77.78	0	9	intron	sxc
563	chr2R	1418683	1418758	chr2R	5531178	5531253	1360	137	56	4	75	1-3	73.84	0	4	intron	CG30438
564	chr2R	1571858	1572080	chr2R	5684353	5684575	ZAM	446	7963	33	222	13-20	72.83	30	1.06452	intron	scaf
565	chr2R	1594071	1594241	chr2R	5706566	5706736	ZAM	62	455	14	170	4-10	74.95	2	4.66667	3` UTR	ap
566	chr2R	1594136	1594350	chr2R	5706631	5706845	gypsy	6	452	25	214	13-12	72.83	12	1.92308	3` UTR	ap
567	chr2R	1691456	1691672	chr2R	5803951	5804167	mdg3	249	5268	25	216	9-16	72.29	26	0.925926	intergenic	dpr12
568	chr2R	1693897	1694112	chr2R	5806392	5806607	ZAM	7962	438	19	215	14-5	68.53	19	0.95	intron	dpr12
569	chr2R	1701021	1701230	chr2R	5813516	5813725	springer	365	2	29	209	10-19	67.86	12	2.23077	intron	dpr12
570	chr2R	1730652	1730875	chr2R	5843147	5843370	blood	7382	7010	37	223	13-24	69.12	16	2.17647	intron	dpr12
571	chr2R	1735909	1736136	chr2R	5848404	5848631	ZAM	7972	456	15	227	6-9	75.95	10	1.36364	intron	dpr12
572	chr2R	1738420	1738586	chr2R	5850915	5851081	297	6602	351	6	166	4-2	66.89	2	2	intron	dpr12
573	chr2R	1816917	1817152	chr2R	5929412	5929647	ZAM	458	7962	30	235	12-18	71.87	17	1.66667	exon	CG43366
574	chr2R	1830429	1830661	chr2R	5942924	5943156	gypsy5	413	1	17	232	7-10	65.84	15	1.0625	intergenic	not near genes
575	chr2R	1910752	1910925	chr2R	6023247	6023420	gypsy	1	7393	22	173	16-6	69.82	7	2.75	intergenic	dream
576	chr2R	1917153	1917377	chr2R	6029648	6029872	ZAM	453	6	13	224	4-9	69.64	18	0.684211	exon	SCAP
577	chr2R	1953434	1953656	chr2R	6065929	6066151	ZAM	7973	456	25	222	11-14	73.49	26	0.925926	exon	CCHa2r
578	chr2R	1974390	1974612	chr2R	6086885	6087107	opus	493	3	11	222	4-7	68.61	10	1	intergenic	Ars2
579	chr2R	1974619	1974833	chr2R	6087114	6087328	297	6590	6968	11	214	3-8	70.79	11	0.916667	intergenic	Ars2
580	chr2R	2021166	2021378	chr2R	6133661	6133873	gypsy	5	7436	24	212	13-11	68.61	9	2.4	intron	EcR
581	chr2R	2052119	2052191	chr2R	6164614	6164686	Tc1-2	48	17	4	72	2-2	79.33	0	4	intergenic	not near genes
582	chr2R	2055900	2056107	chr2R	6168395	6168602	mdg3	5262	5486	17	207	6-11	67.53	9	1.7	intergenic	not near genes
583	chr2R	2056828	2056997	chr2R	6169323	6169492	Quasimodo	7314	8	10	169	4-6	72	1	5	intergenic	not near genes
584	chr2R	2064234	2064297	chr2R	6176729	6176792	297	6580	62	8	63	4-4	66.58	0	8	intergenic	Cyp6w1
585	chr2R	2075292	2075516	chr2R	6187787	6188011	ZAM	7961	446	23	224	15-8	63.97	22	1	intron	Ptr
586	chr2R	2090538	2090759	chr2R	6203033	6203254	ZAM	11	455	39	221	23-16	72.56	36	1.05405	exon	CG30431
587	chr2R	2094072	2094295	chr2R	6206567	6206790	blood	378	7018	30	223	14-16	70.49	12	2.30769	intergenic	CG30431
588	chr2R	2122751	2122978	chr2R	6235246	6235473	ZAM	7966	454	28	227	17-11	70.86	27	1	exon	bin3
589	chr2R	2131017	2131083	chr2R	6243512	6243578	roo	8764	34	6	66	3-3	67.44	0	6	intergenic	Pld
590	chr2R	2286026	2286247	chr2R	6398521	6398742	roo	408	7	20	221	9-11	67.57	95	0.208333	intergenic	not near genes
591	chr2R	2286531	2286635	chr2R	6399026	6399130	gtwin	7016	6917	21	104	20-1	70.73	63	0.328125	intergenic	not near genes
592	chr2R	2396125	2396342	chr2R	6508620	6508837	ZAM	460	7982	19	217	7-12	71.79	15	1.1875	intron	jing
593	chr2R	2415102	2415292	chr2R	6527597	6527787	roo	8682	388	14	190	12-2	67.57	5	2.33333	intron	jing
594	chr2R	2533297	2533516	chr2R	6645792	6646011	mdg3	5251	5487	26	219	18-8	67.46	2	8.66667	intergenic	Fmo-2
595	chr2R	2571570	2571803	chr2R	6684065	6684298	ZAM	460	4	29	233	11-18	70.55	19	1.45	intron	CG9422
596	chr2R	2653354	2653582	chr2R	6765849	6766077	ZAM	7964	453	26	228	15-11	66.56	19	1.3	intron	Epac
597	chr2R	2666665	2666870	chr2R	6779160	6779365	ZAM	10	438	16	205	11-5	66.17	10	1.45455	intron	Epac
598	chr2R	2667322	2667422	chr2R	6779817	6779917	17.6	104	4	16	100	6-10	67.92	3	4	intron	Epac
599	chr2R	2676194	2676418	chr2R	6788689	6788913	ZAM	7	456	20	224	11-9	72.07	3	5	intron	Epac
600	chr2R	2678065	2678294	chr2R	6790560	6790789	ZAM	4	456	28	229	19-9	71.64	17	1.55556	intron	Epac
601	chr2R	2732801	2733012	chr2R	6845296	6845507	copia	4867	236	7	211	6-1	73.24	17	0.388889	intergenic	not near genes
602	chr2R	2735448	2735628	chr2R	6847943	6848123	ZAM	7972	8374	13	180	11-2	67.74	4	2.6	intergenic	not near genes
603	chr2R	2775141	2775345	chr2R	6887636	6887840	opus	480	112	16	204	10-6	66.75	9	1.6	intron	Spn42De
604	chr2R	2804007	2804203	chr2R	6916502	6916698	mdg3	227	5266	13	196	4-9	64.77	6	1.85714	intron	CG30158
605	chr2R	2805776	2806011	chr2R	6918271	6918506	ZAM	457	7961	22	235	7-15	69.67	16	1.29412	intron	CG30158
606	chr2R	2878793	2878996	chr2R	6991288	6991491	springer	359	2	22	203	8-14	68.06	2	7.33333	intergenic	CG17002
607	chr2R	2920147	2920361	chr2R	7032642	7032856	mdg3	5497	5266	20	214	7-13	70.53	16	1.17647	exon	Tsp42Eg
608	chr2R	2936147	2936340	chr2R	7048642	7048835	Transpac	4936	5209	7	193	4-3	71.9	4	1.4	intergenic	Tsp42El
609	chr2R	2957830	2958025	chr2R	7070325	7070520	roo	8668	9042	10	195	9-1	74.07	1	5	intergenic	CG12836
610	chr2R	2975265	2975475	chr2R	7087760	7087970	ZAM	8405	7972	18	210	7-11	68.7	5	3	intergenic	not near genes
611	chr2R	3006586	3006788	chr2R	7119081	7119283	flea	218	4757	32	202	9-23	69.77	14	2.13333	intron	esn
612	chr2R	3011045	3011266	chr2R	7123540	7123761	ZAM	8404	7960	28	221	10-18	67.95	27	1	intron	esn
613	chr2R	3021884	3022116	chr2R	7134379	7134611	roo	8663	411	22	232	11-11	70.03	11	1.83333	intergenic	Cyp9b2
614	chr2R	3055449	3055666	chr2R	7167944	7168161	Transpac	10	307	18	217	11-7	67.26	17	1	intergenic	not near genes
615	chr2R	3062315	3062516	chr2R	7174810	7175011	roo	409	28	27	201	14-13	67.8	15	1.6875	intergenic	CG11060
616	chr2R	3135173	3135360	chr2R	7247668	7247855	1360	3378	29	14	187	11-3	65.95	13	1	intergenic	Ady43A
617	chr2R	3148409	3148618	chr2R	7260904	7261113	412	7530	4	31	209	15-16	65.57	30	1	exon	CG1850
618	chr2R	3189870	3190096	chr2R	7302365	7302591	ZAM	3	452	26	226	19-7	70.18	23	1.08333	intergenic	pwn
619	chr2R	3195675	3195893	chr2R	7308170	7308388	mdg1	7041	413	9	218	3-6	70.52	10	0.818182	intergenic	not near genes
620	chr2R	3247754	3247962	chr2R	7360249	7360457	roo	8684	9070	16	208	4-12	65.79	0	16	intron	Dscam
621	chr2R	3309893	3310119	chr2R	7422388	7422614	ZAM	7960	447	9	226	4-5	72.22	17	0.5	intron	so
622	chr2R	3338687	3338915	chr2R	7451182	7451410	ZAM	449	7960	25	228	7-18	70.8	18	1.31579	intron	fa2h
623	chr2R	3374091	3374290	chr2R	7486586	7486785	ZAM	8395	9	17	199	8-9	71.22	9	1.7	intron	wech
624	chr2R	3381478	3381684	chr2R	7493973	7494179	springer	363	7140	17	206	5-12	72.55	8	1.88889	3` UTR	CG1620
625	chr2R	3428194	3428388	chr2R	7540689	7540883	McClintock	5976	6421	9	194	2-7	77.19	0	9	intron	Corin
626	chr2R	3491879	3492100	chr2R	7604374	7604595	Stalker2	398	3	21	221	11-10	68.86	8	2.33333	intron	CG1358
627	chr2R	3508433	3508525	chr2R	7620928	7621020	BS	5014	4922	6	92	2-4	64.44	1	3	intergenic	CG1358
628	chr2R	3618051	3618258	chr2R	7730546	7730753	McClintock	24	480	10	207	2-8	73.73	6	1.42857	intron	CG18812
629	chr2R	3620282	3620362	chr2R	7732777	7732857	Juan	70	10	6	80	5-1	64.78	0	6	intron	CG18812
630	chr2R	3641808	3642013	chr2R	7754303	7754508	ZAM	7965	456	21	205	16-5	60.6	20	1	intron	CG30497
631	chr2R	3662585	3662810	chr2R	7775080	7775305	ZAM	8412	2	23	225	7-16	67.25	11	1.91667	intron	CG30497
632	chr2R	3688402	3688539	chr2R	7800897	7801034	mdg3	5252	153	15	137	7-8	75.07	6	2.14286	3` UTR	mus205
633	chr2R	3764241	3764442	chr2R	7876736	7876937	roo	9050	6	16	201	3-13	71.38	7	2	intron	Dgk
634	chr2R	3828026	3828126	chr2R	7940521	7940621	jockey	9	110	10	100	3-7	70.47	0	10	intron	CG30379
635	chr2R	3981431	3981638	chr2R	8093926	8094133	ZAM	8	438	20	207	13-7	69	3	5	intron	CG8713
636	chr2R	4064438	4064667	chr2R	8176933	8177162	mdg1	7459	7038	11	229	8-3	73.76	2	3.66667	intron	LRP1
637	chr2R	4088245	4088425	chr2R	8200740	8200920	mdg3	211	5265	4	180	1-3	68	5	0.666667	intron	LRP1
638	chr2R	4094894	4095119	chr2R	8207389	8207614	Transpac	306	1	19	225	16-3	64.98	7	2.375	intron	LRP1
639	chr2R	4204264	4204479	chr2R	8316759	8316974	ZAM	7976	452	26	215	20-6	72.85	13	1.85714	intergenic	not near genes
640	chr2R	4205028	4205252	chr2R	8317523	8317747	HMS-Beagle	7041	6799	17	224	6-11	65.33	1	8.5	intergenic	not near genes
641	chr2R	4291463	4291689	chr2R	8403958	8404184	ZAM	5	454	29	226	17-12	68.53	30	0.935484	exon	CG2121
642	chr2R	4327549	4327774	chr2R	8440044	8440269	roo	8663	406	11	225	8-3	77.88	5	1.83333	exon	Cyp4ad1
643	chr2R	4331811	4332003	chr2R	8444306	8444498	copia	37	256	10	192	7-3	63.87	4	2	intergenic	Cyp4ad1
644	chr2R	4344862	4345088	chr2R	8457357	8457583	ZAM	7964	8413	31	226	20-11	68.28	2	10.3333	exon	Mal-A3
645	chr2R	4355868	4356078	chr2R	8468363	8468573	ZAM	8394	7961	18	210	3-15	71.18	20	0.857143	intergenic	Mal-A6
646	chr2R	4371377	4371523	chr2R	8483872	8484018	Ivk	5331	24	11	146	4-7	71.76	2	3.66667	intron	mtt
647	chr2R	4377189	4377409	chr2R	8489684	8489904	diver	221	5893	12	220	8-4	76.17	7	1.5	intron	mtt
648	chr2R	4393928	4394112	chr2R	8506423	8506607	ZAM	8414	45	15	184	7-8	70.93	1	7.5	intron	mtt
649	chr2R	4415523	4415697	chr2R	8528018	8528192	copia	203	4871	12	174	4-8	70.5	11	1	intron	mtt
650	chr2R	4422462	4422676	chr2R	8534957	8535171	Max-element	8520	8234	21	214	7-14	69.46	14	1.4	intergenic	mtt
651	chr2R	4447559	4447749	chr2R	8560054	8560244	flea	4767	4984	14	190	13-1	71.14	4	2.8	intergenic	not near genes
652	chr2R	4465911	4466128	chr2R	8578406	8578623	ZAM	455	15	23	217	7-16	69.57	0	23	5` UTR	CG42326
653	chr2R	4520918	4521127	chr2R	8633413	8633622	springer	376	13	21	209	10-11	69.37	5	3.5	intergenic	CG8635
654	chr2R	4529745	4529969	chr2R	8642240	8642464	ZAM	456	9	19	224	10-9	68.32	13	1.35714	intergenic	not near genes
655	chr2R	4530386	4530541	chr2R	8642881	8643036	Doc2-element	4713	4698	12	155	3-9	60.95	2	4	intergenic	not near genes
656	chr2R	4598984	4599216	chr2R	8711479	8711711	ZAM	454	7961	28	232	9-19	73.88	15	1.75	exon	CG14743
657	chr2R	4721619	4721811	chr2R	8834114	8834306	mdg3	5275	232	17	192	9-8	67.84	10	1.54545	intron	sns
658	chr2R	4730711	4730891	chr2R	8843206	8843386	mdg3	228	31	11	180	6-5	67.39	2	3.66667	intron	sns
659	chr2R	4786176	4786398	chr2R	8898671	8898893	mdg3	245	5258	30	222	6-24	71.49	17	1.66667	3` UTR	sec31
660	chr2R	4900597	4900802	chr2R	9013092	9013297	springer	7	7504	30	205	20-10	68.36	14	2	exon	CG8172
661	chr2R	4924236	4924468	chr2R	9036731	9036963	ZAM	7960	453	24	232	20-4	70.36	23	1	intergenic	Ance-4
662	chr2R	4997488	4997691	chr2R	9109983	9110186	Tabor	7324	6865	16	203	6-10	70.08	12	1.23077	intergenic	Pmm45A
663	chr2R	5006431	5006523	chr2R	9118926	9119018	Max-element	308	216	15	92	11-4	69.02	4	3	exon	Su(var)2-10
664	chr2R	5052142	5052334	chr2R	9164637	9164829	Ivk	7	5358	6	192	4-2	65.45	4	1.2	exon	CG8046
665	chr2R	5147337	5147571	chr2R	9259832	9260066	ZAM	7961	456	43	234	29-14	67.44	18	2.26316	exon	Pkn
666	chr2R	5150402	5150615	chr2R	9262897	9263110	rover	7282	6950	14	213	1-13	75.29	1	7	intron	Pkn
667	chr2R	5171211	5171369	chr2R	9283706	9283864	ZAM	7977	394	11	158	6-5	62.85	10	1	intron	Pkn
668	chr2R	5228452	5228673	chr2R	9340947	9341168	ZAM	8405	7961	18	221	9-9	71.59	15	1.125	intron	CG13739
669	chr2R	5295605	5295797	chr2R	9408100	9408292	FB	1	32	7	192	2-5	70.67	0	7	intron	wun
670	chr2R	5315071	5315287	chr2R	9427566	9427782	297	6595	394	15	216	7-8	71.38	6	2.14286	intron	Pdk
671	chr2R	5399503	5399727	chr2R	9511998	9512222	ZAM	452	5	39	224	18-21	68.58	22	1.69565	intron	brp
672	chr2R	5428345	5428408	chr2R	9540840	9540903	springer	68	8	4	63	3-1	66.16	0	4	3` UTR	brp
673	chr2R	5474976	5475205	chr2R	9587471	9587700	ZAM	452	7962	27	229	10-17	68.07	0	27	5` UTR	RpL31
674	chr2R	5523002	5523221	chr2R	9635497	9635716	ZAM	455	11	23	219	8-15	65.74	1	11.5	intron	Mmp2
675	chr2R	5534996	5535201	chr2R	9647491	9647696	mdg3	232	5261	24	205	11-13	69.28	5	4	intron	Mmp2
676	chr2R	5563020	5563231	chr2R	9675515	9675726	ZAM	7985	457	15	211	7-8	69.73	5	2.5	intron	Mmp2
677	chr2R	5567368	5567599	chr2R	9679863	9680094	mdg3	247	5251	30	231	12-18	70.22	36	0.810811	intron	Mmp2
678	chr2R	5588278	5588451	chr2R	9700773	9700946	ZAM	7958	8352	15	173	8-7	71.2	0	15	intergenic	not near genes
679	chr2R	5598802	5599005	chr2R	9711297	9711500	springer	7507	7150	18	203	9-9	64.96	13	1.28571	intergenic	CG10459
680	chr2R	5628756	5628976	chr2R	9741251	9741471	mdg3	240	5255	21	220	11-10	66.29	13	1.5	intron	sqa
681	chr2R	5668829	5669046	chr2R	9781324	9781541	ZAM	7964	442	26	217	17-9	65.33	6	3.71429	intron	CG1688
682	chr2R	5701956	5702302	chr2R	9814451	9814797	ZAM	7961	8412	120	346	68-52	68.29	48	2.44898	intron	CG1648
683	chr2R	5758407	5758578	chr2R	9870902	9871073	roo	407	8720	31	171	14-17	69.1	0	31	intergenic	cbx
684	chr2R	5760879	5761349	chr2R	9873374	9873844	I-element	59	18	17	470	4-13	66.27	66	0.253731	3` UTR	CG18446
685	chr2R	5791468	5791695	chr2R	9903963	9904190	ZAM	8410	7960	26	227	3-23	72.38	6	3.71429	intergenic	CG1441
686	chr2R	5792267	5792439	chr2R	9904762	9904934	springer	7469	14	12	172	3-9	61.89	0	12	intergenic	CG1441
687	chr2R	5793578	5793801	chr2R	9906073	9906296	ZAM	2	8410	28	223	16-12	69.76	18	1.47368	intergenic	CG1441
688	chr2R	5831860	5832064	chr2R	9944355	9944559	ZAM	8409	20	24	204	9-15	69.92	14	1.6	5` UTR	Mef2
689	chr2R	5837566	5837783	chr2R	9950061	9950278	springer	7519	11	13	217	6-7	69.39	7	1.625	intergenic	not near genes
690	chr2R	6023105	6023340	chr2R	10135600	10135835	mdg3	5250	250	30	235	19-11	72.05	34	0.857143	exon	gem
691	chr2R	6061835	6062021	chr2R	10174330	10174516	mdg3	203	5252	10	186	5-5	67.27	0	10	intergenic	not near genes
692	chr2R	6078559	6078661	chr2R	10191054	10191156	Stalker4	7058	6956	5	102	2-3	80.4	0	5	intergenic	not near genes
693	chr2R	6080641	6080791	chr2R	10193136	10193286	roo	8666	8995	18	150	9-9	71.89	1	9	intergenic	not near genes
694	chr2R	6248914	6249131	chr2R	10361409	10361626	ZAM	8402	7975	13	217	3-10	69.38	5	2.16667	intron	CG42732
695	chr2R	6281280	6281438	chr2R	10393775	10393933	roo	8681	356	5	158	1-4	67.2	0	5	intron	CG42732
696	chr2R	6304363	6304580	chr2R	10416858	10417075	ZAM	446	7967	14	217	8-6	77.86	13	1	intergenic	Prx2540-2
697	chr2R	6306676	6306877	chr2R	10419171	10419372	ZAM	8399	13	9	201	2-7	72.15	60	0.147541	exon	Prx2540-2
698	chr2R	6346714	6346926	chr2R	10459209	10459421	ZAM	7971	8406	13	212	8-5	74.46	6	1.85714	intron	G-oalpha47A
699	chr2R	6368018	6368223	chr2R	10480513	10480718	springer	10	369	37	205	19-18	64.72	8	4.11111	exon	CG17765
700	chr2R	6414948	6415122	chr2R	10527443	10527617	copia	1	202	5	174	3-2	68.67	0	5	intron	lola
701	chr2R	6425187	6425387	chr2R	10537682	10537882	springer	7498	7	20	200	3-17	73.37	12	1.53846	intron	lola
702	chr2R	6426833	6426941	chr2R	10539328	10539436	copia	158	4892	12	108	6-6	73.22	4	2.4	intron	lola
703	chr2R	6534115	6534338	chr2R	10646610	10646833	mdg3	5258	246	19	223	14-5	71.12	12	1.46154	exon	Elp2
704	chr2R	6541832	6542050	chr2R	10654327	10654545	ZAM	457	7978	19	218	7-12	68.07	12	1.46154	intergenic	not near genes
705	chr2R	6554778	6554967	chr2R	10667273	10667462	ZAM	455	43	23	189	12-11	72.58	16	1.35294	intergenic	not near genes
706	chr2R	6566206	6566439	chr2R	10678701	10678934	ZAM	7960	454	33	233	21-12	68	19	1.65	intron	stan
707	chr2R	6606249	6606432	chr2R	10718744	10718927	ZAM	449	38	21	183	8-13	68.83	6	3	intron	stan
708	chr2R	6674512	6674619	chr2R	10787007	10787114	ZAM	7962	8069	11	107	6-5	69.82	0	11	intron	CG33144
709	chr2R	6861425	6861658	chr2R	10973920	10974153	ZAM	7962	454	23	233	13-10	68.09	8	2.55556	intergenic	not near genes
710	chr2R	6912482	6912543	chr2R	11024977	11025038	jockey	4893	4954	8	61	3-5	64.08	0	8	intron	luna
711	chr2R	6913546	6913747	chr2R	11026041	11026242	hobo	1	2921	20	201	11-9	67.97	5	3.33333	intron	luna
712	chr2R	6917699	6917793	chr2R	11030194	11030288	Doc	105	11	17	94	9-8	68.71	0	17	intron	luna
713	chr2R	6933484	6933682	chr2R	11045979	11046177	springer	6	357	12	198	6-6	64.11	0	12	intron	luna
714	chr2R	6934767	6934989	chr2R	11047262	11047484	copia	4873	257	14	222	10-4	70.29	2	4.66667	intron	luna
715	chr2R	6939351	6939587	chr2R	11051846	11052082	ZAM	7960	457	21	236	12-9	71.24	25	0.807692	intron	luna
716	chr2R	6981232	6981355	chr2R	11093727	11093850	mdg3	83	5475	11	123	5-6	72.61	5	1.83333	intron	luna
717	chr2R	6997967	6998160	chr2R	11110462	11110655	roo	9035	8663	18	193	7-11	69.37	0	18	intergenic	not near genes
718	chr2R	7041089	7041227	chr2R	11153584	11153722	ZAM	454	8055	11	138	5-6	77.7	1	5.5	intron	CG13229
719	chr2R	7057833	7058050	chr2R	11170328	11170545	Juan	6	4215	7	217	4-3	74.19	12	0.538462	intron	CG13229
720	chr2R	7073410	7073614	chr2R	11185905	11186109	Bari1	1701	23	15	204	7-8	68	4	3	intron	shn
721	chr2R	7075926	7076121	chr2R	11188421	11188616	mdg3	20	235	15	195	7-8	65.82	1	7.5	intron	shn
722	chr2R	7078473	7078693	chr2R	11190968	11191188	17.6	487	5	31	220	9-22	72.15	4	6.2	intron	shn
723	chr2R	7121924	7122057	chr2R	11234419	11234552	I-element	37	5306	6	133	4-2	62.22	4	1.2	intergenic	metro
724	chr2R	7125579	7125718	chr2R	11238074	11238213	springer	300	7	8	139	4-4	74.08	2	2.66667	intergenic	CG13227
725	chr2R	7323234	7323326	chr2R	11435729	11435821	ZAM	3	8057	11	92	5-6	63.7	0	11	intergenic	CR43771
726	chr2R	7462458	7462741	chr2R	11574953	11575236	INE-1	148	146	5	283	3-2	70.13	0	5	intergenic	tou
727	chr2R	7478620	7478809	chr2R	11591115	11591304	mdg3	237	5283	17	189	8-9	71.14	9	1.7	exon	tou
728	chr2R	7492974	7493079	chr2R	11605469	11605574	Juan	64	4181	4	105	2-2	68.83	0	4	intergenic	not near genes
729	chr2R	7546490	7546712	chr2R	11658985	11659207	1360	1	3385	24	222	19-5	70.25	25	0.923077	intron	Roc2
730	chr2R	7580258	7580489	chr2R	11692753	11692984	ZAM	5	459	20	231	14-6	74.57	12	1.53846	intron	CG13197
731	chr2R	7719432	7719657	chr2R	11831927	11832152	ZAM	447	7961	26	225	9-17	68.67	12	2	intron	Sobp
732	chr2R	7721569	7721759	chr2R	11834064	11834254	ZAM	458	8007	13	190	7-6	68.21	10	1.18182	intron	Sobp
733	chr2R	7748244	7748448	chr2R	11860739	11860943	mdg3	224	5254	14	204	5-9	74.1	3	3.5	3` UTR	Mtor
734	chr2R	7800115	7800351	chr2R	11912610	11912846	ZAM	7960	457	25	236	18-7	72	18	1.31579	5` UTR	CG13183
735	chr2R	7932612	7932800	chr2R	12045107	12045295	copia	233	17	10	188	2-8	63.87	6	1.42857	intron	Drep-1
736	chr2R	7981540	7981773	chr2R	12094035	12094268	ZAM	455	7961	28	233	9-19	71.52	6	4	intron	jeb
737	chr2R	7997952	7998049	chr2R	12110447	12110544	Doc	4	101	10	97	5-5	67.8	0	10	intron	jeb
738	chr2R	8110523	8110683	chr2R	12223018	12223178	297	42	366	14	160	6-8	69.67	0	14	intergenic	CG8854
739	chr2R	8140653	8140891	chr2R	12253148	12253386	3S18	336	5764	9	238	5-4	66.59	3	2.25	intergenic	CG13168
740	chr2R	8165843	8166062	chr2R	12278338	12278557	mdg3	5251	235	23	219	12-11	64.43	9	2.3	intergenic	not near genes
741	chr2R	8171435	8171639	chr2R	12283930	12284134	roo	8666	9049	12	204	9-3	69.67	7	1.5	intergenic	not near genes
742	chr2R	8185754	8185943	chr2R	12298249	12298438	Transpac	4953	304	13	189	6-7	68.97	9	1.3	intergenic	CG42700
743	chr2R	8188440	8188653	chr2R	12300935	12301148	mdg3	5257	5487	23	213	19-4	69.33	17	1.27778	exon	CG8850
744	chr2R	8224004	8224203	chr2R	12336499	12336698	pogo	2100	32	6	199	3-3	65.45	0	6	intergenic	garz
745	chr2R	8242146	8242382	chr2R	12354641	12354877	ZAM	458	7961	31	236	16-15	71.33	15	1.9375	exon	CG30047
746	chr2R	8244933	8245133	chr2R	12357428	12357628	17.6	7406	6944	13	200	6-7	75.23	3	3.25	exon	CG30049
747	chr2R	8270901	8271091	chr2R	12383396	12383586	springer	26	370	19	190	8-11	66.18	3	4.75	intron	CG8501
748	chr2R	8273135	8273379	chr2R	12385630	12385874	ZAM	451	7958	12	244	6-6	65.33	26	0.444444	intergenic	CG8501
749	chr2R	8304286	8304515	chr2R	12416781	12417010	pogo	2100	2	10	229	9-1	69.93	4	2	exon	CG13157
750	chr2R	8327915	8328080	chr2R	12440410	12440575	ZAM	55	443	17	165	9-8	66.78	8	1.88889	intron	Dyb
751	chr2R	8341883	8342098	chr2R	12454378	12454593	gypsy	454	6994	18	215	10-8	72	8	2	intron	Lac
752	chr2R	8366233	8366422	chr2R	12478728	12478917	ZAM	457	8006	16	189	9-7	75.54	2	5.33333	intron	Dh44-R2
753	chr2R	8491137	8491356	chr2R	12603632	12603851	ZAM	8404	7962	25	219	9-16	66.88	2	8.33333	intron	Amph
754	chr2R	8547877	8548096	chr2R	12660372	12660591	ZAM	441	7961	26	219	4-22	72.49	34	0.742857	exon	nemy
755	chr2R	8657168	8657363	chr2R	12769663	12769858	blood	7353	7009	22	195	4-18	67.09	2	7.33333	intergenic	not near genes
756	chr2R	8696935	8697086	chr2R	12809430	12809581	flea	4758	4933	18	151	13-5	73.41	0	18	intergenic	CG17580
757	chr2R	8704558	8704631	chr2R	12817053	12817126	F-element	108	36	6	73	3-3	71.56	0	6	intergenic	not near genes
758	chr2R	8725235	8725438	chr2R	12837730	12837933	roo	8688	407	13	203	5-8	72.1	10	1.18182	intergenic	not near genes
759	chr2R	8834112	8834339	chr2R	12946607	12946834	ZAM	9	459	19	227	12-7	68.18	13	1.35714	intergenic	Mdr49
760	chr2R	8878167	8878387	chr2R	12990662	12990882	ZAM	8	451	16	220	7-9	69.67	13	1.14286	intergenic	not near genes
761	chr2R	8904655	8904885	chr2R	13017150	13017380	mdg3	249	5254	20	230	9-11	66.93	18	1.05263	intergenic	not near genes
762	chr2R	8921974	8922196	chr2R	13034469	13034691	opus	8	498	13	222	6-7	74.92	1	6.5	intergenic	not near genes
763	chr2R	8935212	8935442	chr2R	13047707	13047937	mdg3	248	5253	19	230	5-14	67.09	2	6.33333	intergenic	CG13323
764	chr2R	8936495	8936701	chr2R	13048990	13049196	pogo	21	2095	5	206	2-3	59.6	0	5	intergenic	CG13323
765	chr2R	8996312	8996540	chr2R	13108807	13109035	mdg1	7038	7459	11	228	5-6	75.27	13	0.785714	intergenic	not near genes
766	chr2R	9168938	9169041	chr2R	13281433	13281536	F-element	116	12	12	103	8-4	69.67	1	6	intron	Dh31-R1
767	chr2R	9197229	9197446	chr2R	13309724	13309941	roo	407	8670	17	217	5-12	74.39	6	2.42857	intergenic	not near genes
768	chr2R	9222547	9222761	chr2R	13335042	13335256	springer	7513	7145	14	214	9-5	66.9	20	0.666667	intron	CG44206
769	chr2R	9235006	9235118	chr2R	13347501	13347613	jockey	22	4923	7	112	6-1	66.86	3	1.75	intron	CG44206
770	chr2R	9291354	9291451	chr2R	13403849	13403946	jockey	105	7	12	97	8-4	72.83	0	12	intergenic	not near genes
771	chr2R	9359174	9359312	chr2R	13471669	13471807	copia	4958	254	11	138	4-7	74.18	5	1.83333	intron	arr
772	chr2R	9361941	9362168	chr2R	13474436	13474663	HMS-Beagle	6798	245	40	227	25-15	71.07	35	1.11111	intron	arr
773	chr2R	9428965	9429146	chr2R	13541460	13541641	jockey	8	4951	15	181	9-6	68.71	7	1.875	intron	CG6145
774	chr2R	9493134	9493275	chr2R	13605629	13605770	mdg3	5306	5464	14	141	7-7	70.05	0	14	intergenic	CG34236
775	chr2R	9575345	9575537	chr2R	13687840	13688032	hopper	1410	1408	11	192	4-7	64.61	9	1.1	intron	fas
776	chr2R	9576860	9577083	chr2R	13689355	13689578	HMS-Beagle	243	5	19	223	7-12	74.21	8	2.11111	intron	fas
777	chr2R	9640554	9640698	chr2R	13753049	13753193	ZAM	8355	7991	10	144	1-9	62.4	0	10	intergenic	CG6280
778	chr2R	9640998	9641130	chr2R	13753493	13753625	ZAM	8	8323	14	132	8-6	70.62	0	14	intergenic	CG6280
779	chr2R	9661284	9661521	chr2R	13773779	13774016	ZAM	7958	456	20	237	11-9	71.53	7	2.5	intron	Cpr50Ca
780	chr2R	9830933	9831158	chr2R	13943428	13943653	mdg3	5258	247	15	225	10-5	66.76	3	3.75	3` UTR	AGO1
781	chr2R	9912816	9912910	chr2R	14025311	14025405	ZAM	8320	454	8	94	6-2	73.67	0	8	intron	mam
782	chr2R	9936786	9936950	chr2R	14049281	14049445	ZAM	8345	7960	19	164	10-9	71.16	3	4.75	intron	mam
783	chr2R	10024417	10024622	chr2R	14136912	14137117	FB	19	1	11	205	6-5	70	1	5.5	intron	Prosap
784	chr2R	10037865	10038060	chr2R	14150360	14150555	Juan	1	4194	14	195	8-6	76.24	12	1.07692	exon	Rcd1
785	chr2R	10058591	10058818	chr2R	14171086	14171313	mdg3	5250	242	22	227	15-7	71.73	19	1.1	intron	CG8331
786	chr2R	10133569	10133776	chr2R	14246064	14246271	mdg3	5492	16	22	207	9-13	71.55	6	3.14286	3` UTR	CG8503
787	chr2R	10185335	10185566	chr2R	14297830	14298061	ZAM	7961	453	27	231	21-6	73.68	39	0.675	exon	Ih
788	chr2R	10218081	10218295	chr2R	14330576	14330790	412	7537	3	22	214	9-13	68.67	4	4.4	intron	Shroom
789	chr2R	10276287	10276491	chr2R	14388782	14388986	mdg3	248	5279	10	204	5-5	73.27	2	3.33333	intergenic	CG10104
790	chr2R	10325127	10325319	chr2R	14437622	14437814	ZAM	410	7962	15	192	5-10	68.53	8	1.66667	intron	Oaz
791	chr2R	10369781	10369988	chr2R	14482276	14482483	springer	7159	7520	16	207	7-9	69.54	22	0.695652	intron	L
792	chr2R	10374539	10374758	chr2R	14487034	14487253	FB	4	2	10	219	4-6	71.93	22	0.434783	intron	L
793	chr2R	10375157	10375382	chr2R	14487652	14487877	ZAM	448	7962	25	225	11-14	69.17	45	0.543478	intron	L
794	chr2R	10404712	10404786	chr2R	14517207	14517281	springer	7193	284	6	74	3-3	76.55	0	6	intergenic	Cpr51A
795	chr2R	10405160	10405380	chr2R	14517655	14517875	copia	3	250	9	220	6-3	70.81	6	1.28571	intergenic	Cpr51A
796	chr2R	10443076	10443263	chr2R	14555571	14555758	roo	404	38	13	187	7-6	72.05	3	3.25	intron	ttv
797	chr2R	10468927	10469101	chr2R	14581422	14581596	297	6613	370	5	174	3-2	62.13	0	5	intron	ttv
798	chr2R	10489611	10489800	chr2R	14602106	14602295	mdg3	239	33	16	189	9-7	70.08	6	2.28571	3` UTR	tra2
799	chr2R	10524095	10524324	chr2R	14636590	14636819	ZAM	7962	452	32	229	22-10	70.23	33	0.941176	intergenic	CG43236
800	chr2R	10600901	10601129	chr2R	14713396	14713624	ZAM	456	5	21	228	5-16	71.87	6	3	5` UTR	mspo
801	chr2R	10627311	10627530	chr2R	14739806	14740025	opus	7115	488	21	219	13-8	74.16	1	10.5	3` UTR	CG12858
802	chr2R	10730102	10730255	chr2R	14842597	14842750	mdg1	39	381	8	153	3-5	65.08	1	4	intergenic	NaPi-T
803	chr2R	10770691	10770876	chr2R	14883186	14883371	X-element	8	4683	20	185	16-4	68.47	2	6.66667	exon	Cyp6a20
804	chr2R	10788136	10788354	chr2R	14900631	14900849	ZAM	8406	3	23	218	7-16	68.09	20	1.09524	exon	Cyp317a1
805	chr2R	10790664	10790857	chr2R	14903159	14903352	ZAM	432	16	17	193	6-11	66.59	11	1.41667	exon	CG10249
806	chr2R	10832274	10832448	chr2R	14944769	14944943	roo	2	9019	18	174	10-8	73.67	5	3	3` UTR	aPKC
807	chr2R	10833071	10833280	chr2R	14945566	14945775	roo	22	411	23	209	13-10	71.88	4	4.6	intron	aPKC
808	chr2R	10883597	10883800	chr2R	14996092	14996295	mdg3	5480	5253	24	203	10-14	70.33	12	1.84615	intergenic	CG10265
809	chr2R	10892599	10892675	chr2R	15005094	15005170	BS	5078	5002	6	76	3-3	65.11	0	6	intergenic	not near genes
810	chr2R	10892844	10893071	chr2R	15005339	15005566	flea	4756	5011	22	227	14-8	69.55	21	1	intergenic	not near genes
811	chr2R	10896424	10896521	chr2R	15008919	15009016	roo	8689	301	9	97	6-3	66.82	2	3	intergenic	hbs
812	chr2R	10900101	10900296	chr2R	15012596	15012791	mdg3	15	227	17	195	8-9	67.84	17	0.944444	intron	hbs
813	chr2R	10913218	10913325	chr2R	15025713	15025820	hobo	14	87	15	107	7-8	68.18	20	0.714286	intron	hbs
814	chr2R	10945163	10945374	chr2R	15057658	15057869	mdg3	5253	5481	22	211	16-6	69.76	0	22	intergenic	CG33467
815	chr2R	10950446	10950533	chr2R	15062941	15063028	ZAM	7962	95	8	87	3-5	69.42	0	8	intergenic	not near genes
816	chr2R	11020596	11020811	chr2R	15133091	15133306	mdg3	5482	5250	20	215	5-15	69.2	20	0.952381	intron	chn
817	chr2R	11077840	11078062	chr2R	15190335	15190557	pogo	2093	3	11	222	5-6	71.64	0	11	intergenic	igl
818	chr2R	11174006	11174231	chr2R	15286501	15286726	ZAM	7969	455	16	225	14-2	63.63	14	1.06667	intron	trpm
819	chr2R	11198940	11199038	chr2R	15311435	15311533	3S18	5867	5769	10	98	6-4	73	0	10	intergenic	CG8152
820	chr2R	11260747	11261073	chr2R	15373242	15373568	1360	124	165	12	326	5-7	76.28	0	12	intergenic	Pms2
821	chr2R	11262234	11262401	chr2R	15374729	15374896	1360	41	428	4	167	3-1	49.5	0	4	intergenic	dup
822	chr2R	11283710	11283883	chr2R	15396205	15396378	mdg3	5442	5253	15	173	5-10	71.6	7	1.875	intergenic	not near genes
823	chr2R	11283877	11284071	chr2R	15396372	15396566	3S18	5788	6094	14	194	10-4	67.95	8	1.55556	intergenic	not near genes
824	chr2R	11301096	11301331	chr2R	15413591	15413826	ZAM	459	7962	17	235	7-10	71.06	12	1.30769	intron	CG43729
825	chr2R	11310260	11310496	chr2R	15422755	15422991	ZAM	7958	455	24	236	12-12	75.61	20	1.14286	exon	CG43729
826	chr2R	11333468	11333681	chr2R	15445963	15446176	roo	395	8666	14	213	7-7	76.86	4	2.8	intron	CG43729
827	chr2R	11370057	11370258	chr2R	15482552	15482753	ZAM	444	7983	22	201	10-12	66.52	9	2.2	5` UTR	CG8180
828	chr2R	11421836	11422064	chr2R	15534331	15534559	ZAM	7960	449	20	228	11-9	68.9	19	1	intron	CG30471
829	chr2R	11422967	11423128	chr2R	15535462	15535623	springer	7484	32	6	161	3-3	60.22	1	3	exon	CG30471
830	chr2R	11443080	11443308	chr2R	15555575	15555803	mdg3	5498	5253	20	228	12-8	68.93	8	2.22222	intergenic	CG12963
831	chr2R	11504958	11505134	chr2R	15617453	15617629	springer	7506	39	19	176	12-7	70.21	6	2.71429	intron	CG42524
832	chr2R	11530505	11530719	chr2R	15643000	15643214	roo	401	8	16	214	4-12	66.79	14	1.06667	intron	CG42524
833	chr2R	11624893	11625069	chr2R	15737388	15737564	mdg3	15	235	6	176	5-1	61.89	0	6	intron	CG30089
834	chr2R	11637136	11637267	chr2R	15749631	15749762	Juan	4193	53	9	131	3-6	69.56	5	1.5	intron	CG30089
835	chr2R	11697977	11698183	chr2R	15810472	15810678	mdg3	5480	5257	18	206	14-4	72.44	5	3	intron	Zasp52
836	chr2R	11704372	11704594	chr2R	15816867	15817089	ZAM	12	457	26	222	12-14	69.64	13	1.85714	intergenic	Zasp52
837	chr2R	11713185	11713414	chr2R	15825680	15825909	ZAM	458	7960	21	229	17-4	73.49	12	1.61538	intergenic	Poxn
838	chr2R	11757894	11758105	chr2R	15870389	15870600	ZAM	1	435	12	211	10-2	65.67	11	1	3` UTR	sli
839	chr2R	11818081	11818212	chr2R	15930576	15930707	Juan	4096	4205	11	131	7-4	73.15	2	3.66667	intron	bdg
840	chr2R	11896174	11896348	chr2R	16008669	16008843	Juan	4176	245	11	174	4-7	69.94	3	2.75	intron	CG8389
841	chr2R	11960411	11960646	chr2R	16072906	16073141	ZAM	456	7962	13	235	7-6	69.18	5	2.16667	intergenic	not near genes
842	chr2R	12010164	12010346	chr2R	16122659	16122841	mdg1	7075	411	10	182	4-6	65	6	1.42857	3` UTR	Jhe
843	chr2R	12017182	12017348	chr2R	16129677	16129843	springer	333	13	20	166	9-11	67.9	5	3.33333	intron	spin
844	chr2R	12048877	12049083	chr2R	16161372	16161578	springer	7159	7519	14	206	6-8	70.57	30	0.451613	intron	lbk
845	chr2R	12049740	12049965	chr2R	16162235	16162460	ZAM	8410	7962	30	225	14-16	72.84	14	2	intron	lbk
846	chr2R	12075452	12075608	chr2R	16187947	16188103	S-element	1707	63	4	156	3-1	63.67	4	0.8	intron	clu
847	chr2R	12238089	12238325	chr2R	16350584	16350820	ZAM	7962	459	49	236	40-9	70.38	43	1.11364	intergenic	CG15710
848	chr2R	12251928	12252095	chr2R	16364423	16364590	ZAM	24	413	14	167	7-7	65.91	0	14	intergenic	CG6262
849	chr2R	12326559	12326709	chr2R	16439054	16439204	I-element	5290	20	5	150	1-4	66	1	2.5	intergenic	not near genes
850	chr2R	12329869	12330050	chr2R	16442364	16442545	ZAM	457	53	33	181	14-19	70.69	16	1.94118	intergenic	CG4409
851	chr2R	12337872	12338085	chr2R	16450367	16450580	roo	396	8667	15	213	8-7	71.6	11	1.25	intergenic	CG15925
852	chr2R	12341201	12341353	chr2R	16453696	16453848	ZAM	7972	8346	15	152	7-8	71.15	3	3.75	intergenic	not near genes
853	chr2R	12360164	12360378	chr2R	16472659	16472873	hopper	4	1403	8	214	2-6	67.84	13	0.571429	intergenic	not near genes
854	chr2R	12369841	12369919	chr2R	16482336	16482414	ZAM	8210	170	11	78	5-6	66.67	0	11	intergenic	CG15712
855	chr2R	12371599	12371695	chr2R	16484094	16484190	ZAM	104	8	11	96	6-5	69.7	1	5.5	intergenic	CG15712
856	chr2R	12438809	12439038	chr2R	16551304	16551533	ZAM	457	5	25	229	12-13	73.52	2	8.33333	intergenic	Syn2
857	chr2R	12520945	12521151	chr2R	16633440	16633646	ZAM	16	8407	16	206	5-11	69.83	17	0.888889	exon	Alk
858	chr2R	12548188	12548285	chr2R	16660683	16660780	jockey	19	117	15	97	7-8	69.73	1	7.5	intron	Picot
859	chr2R	12590408	12590630	chr2R	16702903	16703125	ZAM	8409	2	26	222	7-19	67.95	24	1.04	intron	CG30463
860	chr2R	12675965	12676193	chr2R	16788460	16788688	ZAM	455	7966	22	228	13-9	70.82	17	1.22222	exon	CG5522
861	chr2R	12685605	12685802	chr2R	16798100	16798297	ZAM	37	457	13	197	4-9	72.72	6	1.85714	intergenic	CG15615
862	chr2R	12716316	12716535	chr2R	16828811	16829030	P-element	3	2883	24	219	13-11	57.22	16	1.41176	intergenic	CG34459
863	chr2R	12733972	12734174	chr2R	16846467	16846669	1360	1	24	11	202	7-4	67.39	3	2.75	intergenic	Ugt37c1
864	chr2R	12755776	12756012	chr2R	16868271	16868507	ZAM	7960	457	24	236	15-9	72.58	9	2.4	5` UTR	Ef1beta
865	chr2R	12779304	12779466	chr2R	16891799	16891961	hopper	35	1406	4	162	3-1	58.16	2	1.33333	intron	CG8910
866	chr2R	12780807	12780898	chr2R	16893302	16893393	jockey	21	113	10	91	4-6	67.6	1	5	intron	CG8910
867	chr2R	12879011	12879173	chr2R	16991506	16991668	springer	364	7189	13	162	12-1	60.72	2	4.33333	intron	Cbp53E
868	chr2R	12968763	12968981	chr2R	17081258	17081476	ZAM	8407	7966	20	218	12-8	71.5	3	5	5` UTR	CG30460
869	chr2R	13077160	13077261	chr2R	17189655	17189756	F-element	13	113	12	101	6-6	64.89	1	6	intergenic	not near genes
870	chr2R	13104246	13104411	chr2R	17216741	17216906	ZAM	7965	389	26	165	20-6	67	2	8.66667	5` UTR	mbl
871	chr2R	13137431	13137642	chr2R	17249926	17250137	ZAM	8410	14	26	211	6-20	70.18	13	1.85714	intron	mbl
872	chr2R	13142109	13142281	chr2R	17254604	17254776	I-element	5328	24	8	172	5-3	68.5	1	4	intron	mbl
873	chr2R	13144083	13144302	chr2R	17256578	17256797	ZAM	8410	7968	19	219	6-13	72.28	9	1.9	intron	mbl
874	chr2R	13161995	13162090	chr2R	17274490	17274585	roo	330	57	9	95	5-4	74.15	1	4.5	intron	mbl
875	chr2R	13243396	13243598	chr2R	17355891	17356093	hobo	2924	9	27	202	8-19	71.33	21	1.22727	intron	mbl
876	chr2R	13319832	13320048	chr2R	17432327	17432543	roo	400	4	25	216	10-15	72.91	17	1.38889	3` UTR	EDTP
877	chr2R	13325271	13325395	chr2R	17437766	17437890	copia	4871	5022	8	124	2-6	79.5	3	2	intron	EDTP
878	chr2R	13449497	13449730	chr2R	17561992	17562225	ZAM	457	7963	27	233	13-14	71.75	22	1.17391	exon	Klp54D
879	chr2R	13454044	13454264	chr2R	17566539	17566759	ZAM	7959	8402	26	220	15-11	70.77	12	2	exon	ns2
880	chr2R	13509126	13509345	chr2R	17621621	17621840	ZAM	9	453	14	219	10-4	69.67	0	14	intron	CG10936
881	chr2R	13520904	13521187	chr2R	17633399	17633682	ZAM	456	90	28	283	14-14	72.67	12	2.15385	intron	CG10936
882	chr2R	13521521	13521739	chr2R	17634016	17634234	ZAM	7980	459	28	218	17-11	68.95	18	1.47368	intron	CG10936
883	chr2R	13557065	13557278	chr2R	17669560	17669773	ZAM	456	7982	22	213	13-9	69.03	2	7.33333	exon	CG30108
884	chr2R	13590557	13590674	chr2R	17703052	17703169	Juan	4180	46	4	117	3-1	59.5	4	0.8	5` UTR	Uhg1
885	chr2R	13686955	13687171	chr2R	17799450	17799666	mdg3	5258	5491	12	216	7-5	68.11	3	3	intergenic	CG5036
886	chr2R	13718929	13719159	chr2R	17831424	17831654	roo	409	8663	18	230	13-5	65.11	0	18	intron	grh
887	chr2R	13737522	13737688	chr2R	17850017	17850183	springer	7490	7170	17	166	7-10	72.98	7	2.125	intron	olf186-F
888	chr2R	13763782	13763899	chr2R	17876277	17876394	jockey	4550	4660	10	117	5-5	72.14	6	1.42857	intron	elk
889	chr2R	13776420	13776651	chr2R	17888915	17889146	ZAM	7966	458	30	231	19-11	70.13	33	0.882353	intron	elk
890	chr2R	13817441	13817607	chr2R	17929936	17930102	copia	244	54	6	166	1-5	72	0	6	intergenic	not near genes
891	chr2R	13834545	13834756	chr2R	17947040	17947251	ZAM	12	8402	30	211	26-4	68.82	0	30	intergenic	not near genes
892	chr2R	13854709	13854930	chr2R	17967204	17967425	Burdock	6390	6144	17	221	7-10	71.92	3	4.25	intergenic	not near genes
893	chr2R	13872834	13873064	chr2R	17985329	17985559	ZAM	7963	454	23	230	12-11	67.88	2	7.66667	intron	dpr13
894	chr2R	13889156	13889367	chr2R	18001651	18001862	ZAM	7983	455	24	211	16-8	68.11	14	1.6	intron	dpr13
895	chr2R	13898336	13898560	chr2R	18010831	18011055	ZAM	8410	7962	17	224	4-13	75.1	17	0.944444	intergenic	dpr13
896	chr2R	13919168	13919357	chr2R	18031663	18031852	ZAM	8372	7960	16	189	6-10	68.46	11	1.33333	intergenic	not near genes
897	chr2R	13929178	13929400	chr2R	18041673	18041895	ZAM	450	7967	48	222	23-25	69.17	0	48	intergenic	CG5773
898	chr2R	13947458	13947664	chr2R	18059953	18060159	ZAM	7985	452	15	206	12-3	61.96	8	1.66667	intergenic	CG10912
899	chr2R	14040061	14040280	chr2R	18152556	18152775	412	4	7541	21	219	13-8	69.08	19	1.05	exon	adp
900	chr2R	14089849	14089982	chr2R	18202344	18202477	ZAM	452	8058	6	133	2-4	82	3	1.5	intergenic	not near genes
901	chr2R	14092965	14093201	chr2R	18205460	18205696	ZAM	458	7961	12	236	7-5	75.5	3	3	intergenic	CG30114
902	chr2R	14104065	14104289	chr2R	18216560	18216784	ZAM	3	8412	18	224	12-6	70.18	14	1.2	intergenic	not near genes
903	chr2R	14131877	14132086	chr2R	18244372	18244581	ZAM	8413	19	17	209	9-8	71.69	7	2.125	intergenic	not near genes
904	chr2R	14156253	14156457	chr2R	18268748	18268952	ZAM	432	7964	18	204	4-14	69.7	13	1.28571	intergenic	not near genes
905	chr2R	14176383	14176482	chr2R	18288878	18288977	mdg3	5258	103	7	99	2-5	71.62	0	7	intron	sbb
906	chr2R	14205270	14205504	chr2R	18317765	18317999	gypsy	6986	7445	24	234	19-5	68.75	4	4.8	intron	sbb
907	chr2R	14225354	14225461	chr2R	18337849	18337956	Doc	7	114	16	107	8-8	72.37	5	2.66667	intron	sbb
908	chr2R	14282792	14283017	chr2R	18395287	18395512	mdg3	5498	5256	10	225	3-7	69.47	1	5	intergenic	Idgf5
909	chr2R	14301204	14301395	chr2R	18413699	18413890	roo	400	8693	10	191	4-6	72.13	0	10	intron	Dp1
910	chr2R	14441702	14441921	chr2R	18554197	18554416	mdg1	6	417	18	219	8-10	70.81	13	1.28571	3` UTR	GEFmeso
911	chr2R	14460863	14461076	chr2R	18573358	18573571	ZAM	442	7	29	213	6-23	68.6	3	7.25	intron	GEFmeso
912	chr2R	14494996	14495217	chr2R	18607491	18607712	diver	219	3	12	221	6-6	65.61	0	12	intron	GEFmeso
913	chr2R	14539273	14539487	chr2R	18651768	18651982	ZAM	447	7972	29	214	14-15	68.67	0	29	intron	SP2637
914	chr2R	14582185	14582381	chr2R	18694680	18694876	BS	4941	5073	13	196	12-1	69.03	2	4.33333	intron	Sik3
915	chr2R	14582616	14582831	chr2R	18695111	18695326	ZAM	7977	453	22	215	11-11	72.15	12	1.69231	intron	Sik3
916	chr2R	14601837	14602050	chr2R	18714332	18714545	Juan	1	4209	8	213	2-6	77.33	18	0.421053	intergenic	pncr016:2R
917	chr2R	14618164	14618310	chr2R	18730659	18730805	mdg3	5440	5277	8	146	1-7	62	0	8	intron	Hs3st-A
918	chr2R	14622329	14622550	chr2R	18734824	18735045	ZAM	7971	453	23	221	15-8	72.29	26	0.851852	intron	Hs3st-A
919	chr2R	14794629	14794703	chr2R	18907124	18907198	I-element	25	99	11	74	6-5	66.06	0	11	intron	sano
920	chr2R	14804588	14804806	chr2R	18917083	18917301	Transpac	307	1	25	218	12-13	64.99	5	4.16667	intron	sano
921	chr2R	14849820	14849988	chr2R	18962315	18962483	ZAM	39	8392	18	168	9-9	67.67	8	2	intergenic	sano
922	chr2R	14888556	14888624	chr2R	19001051	19001119	ZAM	100	32	17	68	7-10	62.39	0	17	intron	abba
923	chr2R	14934932	14935080	chr2R	19047427	19047575	copia	5062	17	4	148	2-2	65	0	4	intergenic	not near genes
924	chr2R	14943506	14943615	chr2R	19056001	19056110	roo	8965	411	10	109	6-4	72.73	4	2	intergenic	CG15116
925	chr2R	14984084	14984365	chr2R	19096579	19096860	roo	396	394	33	281	14-19	71.92	17	1.83333	intron	5-HT1A
926	chr2R	14985009	14985228	chr2R	19097504	19097723	ZAM	7962	442	14	219	9-5	67.86	10	1.27273	intron	5-HT1A
927	chr2R	14995937	14996147	chr2R	19108432	19108642	jockey	11	4974	10	210	4-6	69.07	1	5	intron	5-HT1A
928	chr2R	15062453	15062679	chr2R	19174948	19175174	ZAM	8413	2	30	226	15-15	68.73	2	10	exon	CG10737
929	chr2R	15178115	15178344	chr2R	19290610	19290839	blood	379	2	29	229	15-14	67.91	38	0.74359	exon	FK506-bp2
930	chr2R	15182956	15183159	chr2R	19295451	19295654	opus	13	7487	17	203	7-10	71.77	10	1.54545	intron	Tab2
931	chr2R	15251725	15251827	chr2R	19364220	19364322	jockey	116	13	14	102	6-8	70.91	0	14	intron	CG10051
932	chr2R	15262413	15262646	chr2R	19374908	19375141	mdg3	5250	248	18	233	9-9	70.85	12	1.38462	intergenic	CG9416
933	chr2R	15391297	15391529	chr2R	19503792	19504024	ZAM	7961	454	26	232	16-10	68.9	3	6.5	exon	CG11007
934	chr2R	15416016	15416214	chr2R	19528511	19528709	mdg3	5258	220	11	198	8-3	69.52	6	1.57143	3` UTR	sm
935	chr2R	15613927	15614151	chr2R	19726422	19726646	copia	4	255	14	224	7-7	69.43	28	0.482759	intergenic	snoRNA:185
936	chr2R	15657000	15657224	chr2R	19769495	19769719	ZAM	7964	449	18	224	13-5	71.04	9	1.8	exon	Or56a
937	chr2R	15671646	15671851	chr2R	19784141	19784346	Stalker4	2	386	6	205	4-2	63.11	0	6	intergenic	Obp56g
938	chr2R	15671677	15671824	chr2R	19784172	19784319	Stalker	33	7208	11	147	7-4	66.18	0	11	intergenic	Obp56g
939	chr2R	15761932	15762099	chr2R	19874427	19874594	Tabor	3	7265	15	167	11-4	69.2	6	2.14286	intergenic	not near genes
940	chr2R	15772431	15772606	chr2R	19884926	19885101	ZAM	7971	413	17	175	13-4	65.84	11	1.41667	intergenic	not near genes
941	chr2R	15815911	15816129	chr2R	19928406	19928624	ZAM	10	451	24	218	14-10	70.5	21	1.09091	intergenic	not near genes
942	chr2R	15819474	15819700	chr2R	19931969	19932195	ZAM	7970	457	12	226	9-3	71.5	10	1.09091	intergenic	not near genes
943	chr2R	15838451	15838680	chr2R	19950946	19951175	ZAM	8412	7960	34	229	12-22	67.74	22	1.47826	intergenic	CG30447
944	chr2R	15898830	15899063	chr2R	20011325	20011558	ZAM	7963	457	22	233	14-8	74.27	21	1	intergenic	not near genes
945	chr2R	15924918	15925139	chr2R	20037413	20037634	ZAM	12	456	9	221	6-3	72.15	9	0.9	intergenic	not near genes
946	chr2R	15935463	15935632	chr2R	20047958	20048127	springer	28	355	11	169	7-4	60.18	8	1.22222	intergenic	not near genes
947	chr2R	15936298	15936523	chr2R	20048793	20049018	mdg1	1	418	17	225	7-10	73.06	14	1.13333	intergenic	not near genes
948	chr2R	15949562	15949768	chr2R	20062057	20062263	I-element	385	5350	19	206	5-14	70.07	20	0.904762	intergenic	not near genes
949	chr2R	15971548	15971725	chr2R	20084043	20084220	springer	7497	7165	9	177	6-3	62	0	9	intergenic	not near genes
950	chr2R	15975138	15975362	chr2R	20087633	20087857	ZAM	8	455	25	224	14-11	69.39	11	2.08333	intergenic	not near genes
951	chr2R	16038590	16038814	chr2R	20151085	20151309	ZAM	7	454	20	224	16-4	65.43	5	3.33333	intergenic	not near genes
952	chr2R	16043474	16043702	chr2R	20155969	20156197	ZAM	7961	450	26	228	15-11	69.51	19	1.3	intergenic	not near genes
953	chr2R	16070782	16070989	chr2R	20183277	20183484	ZAM	8408	16	20	207	7-13	69.67	17	1.11111	intergenic	not near genes
954	chr2R	16076942	16077106	chr2R	20189437	20189601	ZAM	8350	3	15	164	8-7	69.51	1	7.5	intergenic	not near genes
955	chr2R	16091183	16091258	chr2R	20203678	20203753	springer	89	7151	8	75	2-6	67.5	0	8	intergenic	not near genes
956	chr2R	16095174	16095315	chr2R	20207669	20207810	ZAM	7972	8334	13	141	6-7	73.59	12	1	intergenic	not near genes
957	chr2R	16146370	16146604	chr2R	20258865	20259099	ZAM	455	7960	21	234	10-11	72.95	25	0.807692	exon	CG11055
958	chr2R	16176083	16176304	chr2R	20288578	20288799	ZAM	442	7960	25	221	9-16	67.81	8	2.77778	3` UTR	Cpr56F
959	chr2R	16228320	16228519	chr2R	20340815	20341014	297	6606	6969	10	199	6-4	60.6	0	10	intergenic	CG16739
960	chr2R	16275633	16275847	chr2R	20388128	20388342	mdg3	5482	5251	18	214	9-9	70.59	12	1.38462	intergenic	not near genes
961	chr2R	16299610	16299824	chr2R	20412105	20412319	ZAM	455	7980	15	214	8-7	67.91	14	1	intergenic	not near genes
962	chr2R	16315920	16316133	chr2R	20428415	20428628	ZAM	446	10	26	213	8-18	68.33	6	3.71429	intron	CG12484
963	chr2R	16432940	16433031	chr2R	20545435	20545526	Doc	95	3	7	91	4-3	65.52	0	7	intergenic	CG30148
964	chr2R	16490508	16490736	chr2R	20603003	20603231	ZAM	8411	7960	19	228	3-16	66.7	10	1.72727	intron	bl
965	chr2R	16542648	16542846	chr2R	20655143	20655341	pogo	13	2080	13	198	8-5	64.2	16	0.764706	intron	Lrt
966	chr2R	16584496	16584584	chr2R	20696991	20697079	Doc	109	21	8	88	4-4	67.17	1	4	intergenic	dpr
967	chr2R	16677611	16677839	chr2R	20790106	20790334	springer	7143	379	27	228	17-10	70.44	19	1.35	exon	CG43667
968	chr2R	16677999	16678224	chr2R	20790494	20790719	ZAM	7959	445	18	225	14-4	72.44	11	1.5	intergenic	CG43666
969	chr2R	16765567	16765782	chr2R	20878062	20878277	mdg3	5259	5491	15	215	10-5	66.76	7	1.875	exon	Ipk1
970	chr2R	16916270	16916466	chr2R	21028765	21028961	ZAM	8209	385	5	196	2-3	75.47	0	5	intergenic	CG9350
971	chr2R	17068634	17068739	chr2R	21181129	21181234	ZAM	8013	377	13	105	7-6	67.59	0	13	intron	Pu
972	chr2R	17115999	17116090	chr2R	21228494	21228585	FB	46	88	6	91	2-4	71.45	0	6	intron	ASPP
973	chr2R	17124820	17125045	chr2R	21237315	21237540	mdg3	5251	241	11	225	8-3	69.76	8	1.22222	intron	ASPP
974	chr2R	17153905	17154132	chr2R	21266400	21266627	mdg3	250	5258	16	227	8-8	71.87	6	2.28571	intron	Rgk3
975	chr2R	17283850	17284084	chr2R	21396345	21396579	ZAM	460	7965	25	234	8-17	71.97	1	12.5	intron	Sdc
976	chr2R	17361678	17361911	chr2R	21474173	21474406	ZAM	455	454	34	233	11-23	72.35	3	8.5	intron	Sdc
977	chr2R	17380141	17380330	chr2R	21492636	21492825	mdg3	5285	5491	27	189	14-13	71.88	7	3.375	intron	Fkbp13
978	chr2R	17400279	17400351	chr2R	21512774	21512846	roo	8739	8667	5	72	1-4	72	0	5	intron	MESK2
979	chr2R	17458551	17458773	chr2R	21571046	21571268	ZAM	445	7962	20	222	7-13	68.7	2	6.66667	intron	CG10440
980	chr2R	17462729	17462790	chr2R	21575224	21575285	Rt1b	193	128	7	61	2-5	63.14	0	7	intron	CG10440
981	chr2R	17473527	17473730	chr2R	21586022	21586225	mdg1	7456	23	11	203	7-4	73.33	1	5.5	intergenic	CG30222
982	chr2R	17485497	17485722	chr2R	21597992	21598217	blood	7016	378	35	225	20-15	68.3	0	35	intergenic	not near genes
983	chr2R	17496692	17496927	chr2R	21609187	21609422	ZAM	7961	457	32	235	16-16	72.04	13	2.28571	intron	CG15673
984	chr2R	17499845	17500057	chr2R	21612340	21612552	mdg3	5251	226	20	212	16-4	75.17	4	4	intron	CG15673
985	chr2R	17526914	17527046	chr2R	21639409	21639541	copia	4873	163	5	132	4-1	70.53	0	5	intergenic	CG10321
986	chr2R	17531406	17531632	chr2R	21643901	21644127	mdg3	5497	5254	15	226	4-11	73.07	0	15	intergenic	CG10082
987	chr2R	17569562	17569773	chr2R	21682057	21682268	ZAM	431	7958	22	211	11-11	71.24	13	1.57143	intron	CG30263
988	chr2R	17608388	17608540	chr2R	21720883	21721035	ZAM	7972	8345	14	152	7-7	70.86	6	2	intron	LBR
989	chr2R	17642853	17643037	chr2R	21755348	21755532	copia	256	4914	11	184	2-9	72.36	3	2.75	intergenic	Grx-1
990	chr2R	17729523	17729737	chr2R	21842018	21842232	ZAM	441	4	15	214	5-10	70	11	1.25	intergenic	not near genes
991	chr2R	17750810	17751013	chr2R	21863305	21863508	ZAM	8414	7986	13	203	6-7	66.57	8	1.44444	intergenic	CG9294
992	chr2R	17755371	17755590	chr2R	21867866	21868085	ZAM	455	12	8	219	4-4	76.92	5	1.33333	intergenic	comr
993	chr2R	17819262	17819484	chr2R	21931757	21931979	Transpac	4922	305	28	222	8-20	71.52	16	1.64706	intron	Fili
994	chr2R	17904619	17904836	chr2R	22017114	22017331	ZAM	8414	12	19	217	10-9	68.63	14	1.26667	intron	CG34370
995	chr2R	17943228	17943314	chr2R	22055723	22055809	jockey	4847	4761	6	86	3-3	66	1	3	intergenic	CG13500
996	chr2R	17948760	17948933	chr2R	22061255	22061428	ZAM	8355	7961	25	173	9-16	66.05	8	2.77778	5` UTR	Snp
997	chr2R	18006870	18007076	chr2R	22119365	22119571	Juan	12	4214	11	206	3-8	67.88	8	1.22222	intron	Vrp1
998	chr2R	18020962	18021174	chr2R	22133457	22133669	HMS-Beagle	18	246	16	212	10-6	67.92	5	2.66667	intergenic	CG34205
999	chr2R	18028594	18028699	chr2R	22141089	22141194	ZAM	8308	453	5	105	2-3	79.47	1	2.5	intron	a
1000	chr2R	18044913	18045115	chr2R	22157408	22157610	ZAM	442	17	13	202	1-12	73.38	23	0.541667	intron	a
1001	chr2R	18115904	18116054	chr2R	22228399	22228549	gypsy	7389	20	19	150	8-11	68.74	0	19	intergenic	Oatp58Dc
1002	chr2R	18217390	18217576	chr2R	22329885	22330071	springer	362	7159	13	186	7-6	66.21	5	2.16667	3` UTR	T3dh
1003	chr2R	18218801	18219008	chr2R	22331296	22331503	ZAM	23	453	24	207	15-9	66.31	12	1.84615	exon	T3dh
1004	chr2R	18319011	18319099	chr2R	22431506	22431594	mdg3	138	226	5	88	3-2	75.87	2	1.66667	intergenic	ppk12
1005	chr2R	18332471	18332606	chr2R	22444966	22445101	Juan	8	4139	4	135	2-2	72.5	2	1.33333	intergenic	not near genes
1006	chr2R	18357028	18357261	chr2R	22469523	22469756	ZAM	452	7958	29	233	10-19	68.55	24	1.16	intron	CG10384
1007	chr2R	18403025	18403218	chr2R	22515520	22515713	412	21	478	17	193	9-8	66.67	7	2.125	intron	px
1008	chr2R	18440980	18441044	chr2R	22553475	22553539	mdg3	5254	5318	13	64	7-6	65.79	0	13	intron	px
1009	chr2R	18446325	18446489	chr2R	22558820	22558984	ZAM	46	8395	13	164	7-6	62.87	0	13	intron	px
1010	chr2R	18486130	18486314	chr2R	22598625	22598809	gypsy	6	7409	18	184	17-1	65.63	1	9	intergenic	CG3927
1011	chr2R	18548306	18548536	chr2R	22660801	22661031	gypsy	1	462	27	230	20-7	66.17	28	0.931034	exon	CG42565
1012	chr2R	18703865	18704083	chr2R	22816360	22816578	ZAM	8405	2	22	218	6-16	72.21	2	7.33333	intergenic	stl
1013	chr2R	18752021	18752236	chr2R	22864498	22864713	ZAM	7964	442	16	215	12-4	71.08	10	1.45455	intergenic	fd59A
1014	chr2R	18764507	18764740	chr2R	22876984	22877217	ZAM	7960	454	27	233	17-10	70.3	9	2.7	exon	PIP5K59B
1015	chr2R	18784948	18785163	chr2R	22897425	22897640	springer	369	7137	14	215	10-4	69.19	15	0.875	intron	nahoda
1016	chr2R	18794292	18794359	chr2R	22906769	22906836	Doc	4	71	18	67	10-8	62.89	0	18	intron	nahoda
1017	chr2R	18855536	18855741	chr2R	22968013	22968218	mdg3	5472	5249	12	205	2-10	67.72	7	1.5	intergenic	not near genes
1018	chr2R	18856223	18856299	chr2R	22968700	22968776	Doc	7	83	7	76	4-3	70	0	7	intergenic	not near genes
1019	chr2R	18859360	18859553	chr2R	22971837	22972030	jockey	4973	4669	24	193	10-14	67	5	4	intergenic	not near genes
1020	chr2R	18867439	18867664	chr2R	22979916	22980141	ZAM	8411	7964	14	225	7-7	66.86	4	2.8	intergenic	CG32834
1021	chr2R	18987223	18987423	chr2R	23099700	23099900	springer	7146	363	17	200	11-6	67.65	4	3.4	intergenic	RpL37b
1022	chr2R	18988183	18988404	chr2R	23100660	23100881	ZAM	9	453	13	221	10-3	71.9	7	1.625	intergenic	RpL37b
1023	chr2R	19070126	19070276	chr2R	23182603	23182753	Transpac	42	272	12	150	2-10	70.67	0	12	intron	CG34371
1024	chr2R	19117568	19117668	chr2R	23230045	23230145	HeT-A	5951	6051	12	100	9-3	68.83	6	1.71429	intergenic	CG3092
1025	chr2R	19190162	19190304	chr2R	23302639	23302781	flea	4844	255	11	142	5-6	81.39	10	1	intergenic	not near genes
1026	chr2R	19332044	19332120	chr2R	23444521	23444597	Doc	5	81	12	76	7-5	53.39	0	12	intron	CG43795
1027	chr2R	19350621	19350844	chr2R	23463098	23463321	ZAM	456	2	15	223	5-10	69.02	4	3	intron	CG43795
1028	chr2R	19376352	19376577	chr2R	23488829	23489054	ZAM	7962	448	17	225	10-7	70.16	11	1.41667	intron	CG43795
1029	chr2R	19395553	19395784	chr2R	23508030	23508261	ZAM	8414	7961	28	231	16-12	68.38	0	28	intergenic	CR43794
1030	chr2R	19477408	19477602	chr2R	23589885	23590079	copia	249	4866	12	194	6-6	62.78	0	12	intron	apt
1031	chr2R	19482842	19483069	chr2R	23595319	23595546	ZAM	7960	456	24	227	14-10	70.22	10	2.18182	intron	apt
1032	chr2R	19513291	19513470	chr2R	23625768	23625947	ZAM	453	8013	17	179	6-11	68.51	1	8.5	intergenic	not near genes
1033	chr2R	19654268	19654460	chr2R	23766745	23766937	ZAM	37	8411	10	192	7-3	69.8	1	5	intron	CG9850
1034	chr2R	19676336	19676562	chr2R	23788813	23789039	ZAM	7961	448	19	226	9-10	74.6	9	1.9	intron	CG9850
1035	chr2R	19759407	19759637	chr2R	23871884	23872114	ZAM	7961	452	23	230	18-5	71.07	5	3.83333	intron	ken
1036	chr2R	19770673	19770895	chr2R	23883150	23883372	opus	495	5	22	222	14-8	70.97	7	2.75	intergenic	TM4SF
1037	chr2R	19812505	19812726	chr2R	23924982	23925203	1360	1	3384	17	221	8-9	66.51	2	5.66667	3` UTR	kcc
1038	chr2R	19903510	19903726	chr2R	24015987	24016203	412	7540	3	19	216	10-9	64.95	14	1.26667	exon	CG4324
1039	chr2R	19964925	19965156	chr2R	24077402	24077633	ZAM	7962	454	23	231	12-11	73.19	21	1.04545	intron	Mlp60A
1040	chr2R	19968010	19968193	chr2R	24080487	24080670	roo	8668	9030	17	183	10-7	70.08	14	1.13333	intergenic	Mlp60A
1041	chr2R	20029300	20029424	chr2R	24141777	24141901	412	18	495	16	124	7-9	70.96	5	2.66667	intergenic	not near genes
1042	chr2R	20032307	20032516	chr2R	24144784	24144993	roo	390	1	16	209	4-12	68.96	11	1.33333	intergenic	Dat
1043	chr2R	20056736	20056961	chr2R	24169213	24169438	ZAM	452	7966	24	225	6-18	66.97	24	0.96	exon	CG3328
1044	chr2R	20093602	20093827	chr2R	24206079	24206304	ZAM	2	450	25	225	19-6	71.09	8	2.77778	intron	CG11406
1045	chr2R	20102904	20103081	chr2R	24215381	24215558	ZAM	410	10	31	177	16-15	70.47	26	1.14815	exon	CG30419
1046	chr2R	20133677	20133829	chr2R	24246154	24246306	ZAM	457	84	15	152	8-7	74.58	0	15	intron	nord
1047	chr2R	20159635	20159800	chr2R	24272112	24272277	ZAM	7966	390	16	165	9-7	69.62	0	16	intergenic	CG13577
1048	chr2R	20163242	20163840	chr2R	24275719	24276317	ZAM	456	344	36	598	28-8	73.67	127	0.28125	intergenic	nvy
1049	chr2R	20163856	20163921	chr2R	24276333	24276398	ZAM	8069	42	6	65	3-3	70.77	0	6	intron	nvy
1050	chr2R	20176026	20176125	chr2R	24288503	24288602	ZAM	8060	7961	24	99	11-13	66.64	4	4.8	exon	nvy
1051	chr2R	20190639	20190871	chr2R	24303116	24303348	mdg3	5250	247	15	232	10-5	69.16	15	0.9375	intergenic	betaTub60D
1052	chr2R	20221669	20221884	chr2R	24334146	24334361	ZAM	7961	8399	30	215	18-12	71.4	23	1.25	5` UTR	slbo
1053	chr2R	20222847	20222974	chr2R	24335324	24335451	ZAM	8065	453	11	127	8-3	73.39	1	5.5	intergenic	slbo
1054	chr2R	20231436	20231650	chr2R	24343913	24344127	ZAM	451	16	24	214	6-18	68.7	11	2	5` UTR	bs
1055	chr2R	20254301	20254532	chr2R	24366778	24367009	ZAM	7959	451	15	231	12-3	73.87	6	2.14286	intron	bs
1056	chr2R	20311220	20311431	chr2R	24423697	24423908	1360	1	14	18	211	9-9	69.89	21	0.818182	intron	prom
1057	chr2R	20366446	20366631	chr2R	24478923	24479108	mdg1	401	24	12	185	6-6	63.61	1	6	intron	CG13579
1058	chr2R	20377648	20377720	chr2R	24490125	24490197	F-element	93	21	5	72	2-3	62.27	0	5	3` UTR	CG13579
1059	chr2R	20438683	20438907	chr2R	24551160	24551384	ZAM	5	8414	22	224	15-7	70.88	27	0.785714	intron	CG4622
1060	chr2R	20471123	20471349	chr2R	24583600	24583826	ZAM	444	7957	10	226	2-8	73.93	5	1.66667	intron	pio
1061	chr2R	20528238	20528467	chr2R	24640715	24640944	ZAM	457	5	24	229	6-18	69.81	13	1.71429	3` UTR	CG3640
1062	chr2R	20630713	20630884	chr2R	24743190	24743361	ZAM	8406	8011	8	171	4-4	65.25	3	2	intergenic	CG30421
1063	chr2R	20687831	20688065	chr2R	24800308	24800542	ZAM	7964	459	30	234	21-9	66.8	5	5	intergenic	Orc4
1064	chr2R	20710622	20710820	chr2R	24823099	24823297	mdg3	224	5261	11	198	4-7	71.21	1	5.5	intron	Dll
1065	chr2R	20717670	20717892	chr2R	24830147	24830369	mdg3	5259	5498	18	222	12-6	69.7	0	18	intron	Dll
1066	chr2R	20739056	20739277	chr2R	24851533	24851754	opus	1	7493	11	221	6-5	79.15	0	11	intergenic	CG3650
1067	chr2R	20769286	20769509	chr2R	24881763	24881986	ZAM	7970	454	20	223	16-4	70.7	4	4	3` UTR	CR43466
1068	chr2R	20804960	20805121	chr2R	24917437	24917598	ZAM	74	458	7	161	6-1	79.33	2	2.33333	exon	NaCP60E
1069	chr2R	20817759	20817956	chr2R	24930236	24930433	ZAM	453	7995	14	197	7-7	68.81	0	14	exon	CG30427
1070	chr2R	20854123	20854348	chr2R	24966600	24966825	ZAM	8413	7965	24	225	9-15	73.56	2	8	intron	CG30424
1071	chr2R	20904304	20904518	chr2R	25016781	25016995	ZAM	8409	10	9	214	2-7	71.55	10	0.818182	intron	uzip
1072	chr2R	20922020	20922200	chr2R	25034497	25034677	ZAM	8013	454	8	180	5-3	70.5	2	2.66667	intron	Nplp1
1073	chr2R	20934384	20934519	chr2R	25046861	25046996	ZAM	457	8061	9	135	4-5	80.15	3	2.25	intron	gsb-n
1074	chr2R	20934538	20934643	chr2R	25047015	25047120	mdg3	138	5496	10	105	5-5	70.33	1	5	intron	gsb-n
1075	chr2R	20999181	20999317	chr2R	25111658	25111794	ZAM	7972	8329	8	136	2-6	79.58	0	8	intergenic	not near genes
1076	chr2R	21052961	21053169	chr2R	25165438	25165646	ZAM	8396	7965	7	208	1-6	76.1	5	1.16667	intergenic	CG34038
1077	chr3L	53697	53914	chr3L	53697	53914	roo	396	8663	16	217	7-9	69.92	0	16	intergenic	CG43149
1078	chr3L	131790	132389	chr3L	131790	132389	ZAM	7987	108	30	599	21-9	68.56	20	1.42857	intergenic	Pdk1
1079	chr3L	132403	132646	chr3L	132403	132646	ZAM	8056	8413	39	243	30-9	69.15	2	13	intron	Pdk1
1080	chr3L	133575	133784	chr3L	133575	133784	springer	365	1	21	209	10-11	72.25	0	21	intron	Pdk1
1081	chr3L	139547	139766	chr3L	139547	139766	copia	250	4873	17	219	10-7	70.12	0	17	intron	Pdk1
1082	chr3L	160997	161196	chr3L	160997	161196	springer	370	7154	27	199	12-15	65.33	0	27	intron	p130CAS
1083	chr3L	269483	269643	chr3L	269483	269643	roo	394	8718	12	160	6-6	66.05	0	12	3` UTR	miple
1084	chr3L	523639	523852	chr3L	523639	523852	FB	5	7	13	213	5-8	71.08	0	13	intron	klar
1085	chr3L	569487	569710	chr3L	569487	569710	ZAM	450	4	26	223	9-17	66.33	16	1.52941	intron	hipk
1086	chr3L	598594	598800	chr3L	598594	598800	ZAM	430	7963	22	206	8-14	71.42	14	1.46667	3` UTR	MED14
1087	chr3L	613216	613425	chr3L	613216	613425	ZAM	453	7983	25	209	7-18	69.89	13	1.78571	intergenic	CG42719
1088	chr3L	673015	673615	chr3L	673015	673615	ZAM	8342	454	38	600	18-20	70.67	52	0.716981	intergenic	not near genes
1089	chr3L	681870	682089	chr3L	681870	682089	gypsy	6987	7438	37	219	21-16	69.08	12	2.84615	5` UTR	CG3386
1090	chr3L	762825	763055	chr3L	762825	763055	HMS-Beagle	246	6796	30	230	18-12	69.49	12	2.30769	intergenic	not near genes
1091	chr3L	779736	779838	chr3L	779736	779838	I-element	85	5320	5	102	4-1	76.93	1	2.5	intergenic	not near genes
1092	chr3L	857774	858027	chr3L	857774	858027	ZAM	8251	350	15	253	1-14	76.44	0	15	intergenic	dpr20
1093	chr3L	866480	866579	chr3L	866480	866579	ZAM	8066	5	12	99	6-6	72.11	0	12	intergenic	CG12502
1094	chr3L	947042	947188	chr3L	947042	947188	ZAM	391	7986	15	146	3-12	64.4	1	7.5	intron	Glut1
1095	chr3L	977430	977643	chr3L	977430	977643	ZAM	7971	8414	27	213	20-7	69.53	0	27	intron	Glut1
1096	chr3L	1046662	1046799	chr3L	1046662	1046799	copia	4948	243	6	137	4-2	75	9	0.6	intron	bab1
1097	chr3L	1056693	1056793	chr3L	1056693	1056793	F-element	14	114	6	100	2-4	68.34	0	6	intron	bab1
1098	chr3L	1076958	1077173	chr3L	1076958	1077173	ZAM	456	7972	10	215	6-4	79.93	7	1.25	intron	bab1
1099	chr3L	1083563	1083644	chr3L	1083563	1083644	springer	88	7	9	81	5-4	65.85	0	9	intron	bab1
1100	chr3L	1254504	1254730	chr3L	1254504	1254730	ZAM	5	454	32	226	19-13	68.87	27	1.14286	3` UTR	CG9130
1101	chr3L	1270474	1270578	chr3L	1270474	1270578	ZAM	348	454	5	104	2-3	80	1	2.5	intron	CG9134
1102	chr3L	1327538	1327769	chr3L	1327538	1327769	ZAM	454	7962	42	231	14-28	71.19	16	2.47059	exon	Myo61F
1103	chr3L	1344886	1345107	chr3L	1344886	1345107	ZAM	452	8	33	221	16-17	68.61	8	3.66667	exon	Ptp61F
1104	chr3L	1366288	1366368	chr3L	1366288	1366368	F-element	25	104	9	80	5-4	61.7	1	4.5	intron	Ptp61F
1105	chr3L	1394689	1394912	chr3L	1394689	1394912	ZAM	454	8	30	223	13-17	70.6	13	2.14286	intron	Ptp61F
1106	chr3L	1397066	1397134	chr3L	1397066	1397134	Juan	4127	4195	8	68	4-4	62.75	0	8	intron	Ptp61F
1107	chr3L	1398506	1398706	chr3L	1398506	1398706	copia	3	230	10	200	3-7	69.07	0	10	intron	Ptp61F
1108	chr3L	1531288	1531487	chr3L	1531288	1531487	mdg3	28	244	17	199	10-7	66.43	1	8.5	intron	CG12090
1109	chr3L	1571125	1571322	chr3L	1571125	1571322	ZAM	455	7997	13	197	3-10	69.64	9	1.3	intron	CG12004
1110	chr3L	1578645	1578848	chr3L	1578645	1578848	FB	5	17	10	203	4-6	66.73	0	10	intron	CG13917
1111	chr3L	1586205	1586352	chr3L	1586205	1586352	Transpac	268	4927	13	147	8-5	62.46	0	13	intron	CG13917
1112	chr3L	1604972	1605151	chr3L	1604972	1605151	Juan	4190	3	10	179	8-2	71.53	4	2	3` UTR	CG18170
1113	chr3L	1746462	1746682	chr3L	1746462	1746682	ZAM	7961	444	18	220	11-7	68.37	0	18	intergenic	Gk
1114	chr3L	1763623	1763857	chr3L	1763623	1763857	ZAM	7961	456	52	234	38-14	68.63	38	1.33333	exon	Dhc62B
1115	chr3L	1996641	1996837	chr3L	1996641	1996837	mdg3	218	5257	23	196	6-17	67.39	2	7.66667	intergenic	not near genes
1116	chr3L	2104680	2104873	chr3L	2104680	2104873	ZAM	8397	19	17	193	8-9	72	0	17	exon	sls
1117	chr3L	2107389	2107451	chr3L	2107389	2107451	springer	297	359	4	62	2-2	71.33	0	4	intron	sls
1118	chr3L	2118363	2118468	chr3L	2118363	2118468	Juan	6	91	6	105	3-3	79.78	9	0.6	intergenic	sls
1119	chr3L	2133036	2133233	chr3L	2133036	2133233	springer	7154	368	20	197	9-11	67.4	17	1.11111	intron	zormin
1120	chr3L	2185237	2185447	chr3L	2185237	2185447	roo	12	402	11	210	5-6	68.55	3	2.75	intergenic	CG13810
1121	chr3L	2225279	2225461	chr3L	2225279	2225461	412	7080	472	30	182	23-7	64.8	0	30	intergenic	not near genes
1122	chr3L	2228297	2228398	chr3L	2228297	2228398	ZAM	455	352	10	101	3-7	74.2	8	1.11111	intergenic	osm-1
1123	chr3L	2243782	2243857	chr3L	2243782	2243857	jockey	17	93	6	75	2-4	63.78	0	6	intergenic	ACXD
1124	chr3L	2246739	2246961	chr3L	2246739	2246961	roo	3	411	20	222	12-8	66.17	1	10	exon	CG32301
1125	chr3L	2319697	2319929	chr3L	2319697	2319929	ZAM	455	7962	15	232	7-8	66.71	5	2.5	intergenic	DmsR-1
1126	chr3L	2327411	2327628	chr3L	2327411	2327628	Max-element	299	8245	22	217	12-10	67.48	0	22	intron	DmsR-1
1127	chr3L	2352940	2353227	chr3L	2352940	2353227	roo	403	2	16	287	5-11	66.08	0	16	intergenic	not near genes
1128	chr3L	2388870	2389072	chr3L	2388870	2389072	ZAM	28	8413	23	202	16-7	67.13	1	11.5	intron	CG13800
1129	chr3L	2419079	2419167	chr3L	2419079	2419167	ZAM	8405	8316	4	88	1-3	69.5	0	4	intergenic	not near genes
1130	chr3L	2512484	2512715	chr3L	2512484	2512715	ZAM	458	4	45	231	8-37	69.29	31	1.40625	intron	Spn
1131	chr3L	2519755	2519952	chr3L	2519755	2519952	roo	8684	397	21	197	14-7	69.3	5	3.5	intron	Spn
1132	chr3L	2523567	2523786	chr3L	2523567	2523786	mdg3	236	5256	11	219	4-7	70.91	0	11	intron	Spn
1133	chr3L	2527968	2528155	chr3L	2527968	2528155	springer	369	28	22	187	11-11	65.36	0	22	intron	Spn
1134	chr3L	2570362	2570559	chr3L	2570362	2570559	Max-element	8233	8502	18	197	12-6	66.63	2	6	intron	msn
1135	chr3L	2574738	2574938	chr3L	2574738	2574938	opus	31	7495	11	200	4-7	64.85	0	11	intron	msn
1136	chr3L	2633270	2633498	chr3L	2633270	2633498	springer	365	16	19	228	3-16	69.82	11	1.58333	intron	CG42245
1137	chr3L	2671870	2672098	chr3L	2671870	2672098	ZAM	454	7965	18	228	8-10	72.33	6	2.57143	intron	CG43955
1138	chr3L	2694612	2694815	chr3L	2694612	2694815	opus	137	495	13	203	5-8	72.67	0	13	intron	CG43955
1139	chr3L	2718691	2718776	chr3L	2718691	2718776	mdg3	15	5352	8	85	3-5	68	1	4	intergenic	Mrtf
1140	chr3L	2834194	2834418	chr3L	2834194	2834418	copia	4874	256	9	224	6-3	71.93	9	0.9	intron	CG43444
1141	chr3L	2836490	2836672	chr3L	2836490	2836672	Burdock	6171	6372	9	182	5-4	72.37	3	2.25	intron	CG43444
1142	chr3L	2837233	2837385	chr3L	2837233	2837385	springer	7163	7470	18	152	10-8	67.3	0	18	intron	CG43444
1143	chr3L	2839664	2839818	chr3L	2839664	2839818	ZAM	8335	7960	23	154	11-12	71.33	1	11.5	intron	CG43444
1144	chr3L	2952933	2953151	chr3L	2952933	2953151	ZAM	9	450	18	218	9-9	74.15	9	1.8	intron	Shab
1145	chr3L	2956740	2956968	chr3L	2956740	2956968	ZAM	7962	8413	18	228	6-12	74.89	18	0.947368	intron	Shab
1146	chr3L	2994476	2994664	chr3L	2994476	2994664	ZAM	7963	411	19	188	13-6	67.05	10	1.72727	intergenic	CG2113
1147	chr3L	3004637	3004785	chr3L	3004637	3004785	I-element	5302	5187	7	148	3-4	64.67	5	1.16667	intron	FR
1148	chr3L	3023065	3023249	chr3L	3023065	3023249	I-element	5336	11	19	184	5-14	67.72	2	6.33333	intergenic	aly
1149	chr3L	3033585	3033790	chr3L	3033585	3033790	Juan	4204	1	8	205	4-4	72.5	2	2.66667	intergenic	CG2162
1150	chr3L	3038333	3038530	chr3L	3038333	3038530	ZAM	435	7977	29	197	9-20	67.36	23	1.20833	exon	CG2162
1151	chr3L	3040187	3040326	chr3L	3040187	3040326	gypsy	1	7359	11	139	7-4	72.67	3	2.75	3` UTR	CG2162
1152	chr3L	3057039	3057274	chr3L	3057039	3057274	ZAM	458	1	27	235	12-15	69.85	21	1.22727	exon	CG32486
1153	chr3L	3077463	3077676	chr3L	3077463	3077676	roo	397	4	12	213	6-6	64.39	0	12	intron	CG11486
1154	chr3L	3107876	3108080	chr3L	3107876	3108080	Ivk	5367	5303	9	204	1-8	62.3	0	9	intergenic	Cht7
1155	chr3L	3122874	3123016	chr3L	3122874	3123016	springer	7462	29	8	142	3-5	63.5	20	0.380952	intron	prominin-like
1156	chr3L	3168658	3168888	chr3L	3168658	3168888	gypsy	6990	461	28	230	18-10	69.88	8	3.11111	3` UTR	CG32280
1157	chr3L	3254274	3254501	chr3L	3254274	3254501	ZAM	9	459	20	227	15-5	73.2	3	5	intergenic	CR43626
1158	chr3L	3254905	3255111	chr3L	3254905	3255111	1360	14	7	26	206	13-13	70.72	17	1.44444	intergenic	ckd
1159	chr3L	3263507	3263685	chr3L	3263507	3263685	springer	16	7487	23	178	18-5	64.78	0	23	intron	ckd
1160	chr3L	3274347	3274561	chr3L	3274347	3274561	ZAM	7977	8414	28	214	20-8	71.81	7	3.5	exon	CG14960
1161	chr3L	3274956	3275144	chr3L	3274956	3275144	springer	17	7496	19	188	12-7	62.7	1	9.5	intron	CG14960
1162	chr3L	3306244	3306336	chr3L	3306244	3306336	hopper	7	99	4	92	2-2	74.5	1	2	intron	ZnT63C
1163	chr3L	3389344	3389520	chr3L	3389344	3389520	ZAM	8406	44	16	176	6-10	62.88	3	4	intergenic	not near genes
1164	chr3L	3390761	3390965	chr3L	3390761	3390965	gypsy6	7416	7775	8	204	1-7	74.33	5	1.33333	intergenic	not near genes
1165	chr3L	3390768	3390976	chr3L	3390768	3390976	springer	7141	366	30	208	16-14	66.71	4	6	intergenic	not near genes
1166	chr3L	3398702	3398938	chr3L	3398702	3398938	ZAM	456	7959	29	236	7-22	71.54	9	2.9	intergenic	sty
1167	chr3L	3399867	3400110	chr3L	3399867	3400110	ZAM	457	7961	29	243	8-21	72.48	45	0.630435	intergenic	sty
1168	chr3L	3400410	3400640	chr3L	3400410	3400640	ZAM	454	7963	24	230	5-19	67.61	13	1.71429	intergenic	sty
1169	chr3L	3424547	3424751	chr3L	3424547	3424751	roo	388	5	14	204	8-6	68.29	1	7	5` UTR	sty
1170	chr3L	3431026	3431260	chr3L	3431026	3431260	ZAM	457	7962	22	234	5-17	67.24	13	1.57143	intron	eIF5B
1171	chr3L	3435988	3436165	chr3L	3435988	3436165	mdg3	5492	43	12	177	6-6	70.89	0	12	intron	eIF5B
1172	chr3L	3474046	3474120	chr3L	3474046	3474120	jockey	4769	4843	4	74	2-2	65.5	0	4	intron	CG42324
1173	chr3L	3476084	3476302	chr3L	3476084	3476302	Idefix	2	7386	6	218	4-2	76.11	0	6	intron	CG42324
1174	chr3L	3504434	3504655	chr3L	3504434	3504655	412	492	1	18	221	10-8	65.96	4	3.6	intron	CG42324
1175	chr3L	3505525	3505650	chr3L	3505525	3505650	mdg3	5496	102	12	125	5-7	74.39	4	2.4	intron	CG42324
1176	chr3L	3538250	3538466	chr3L	3538250	3538466	roo	2	397	17	216	9-8	69.57	8	1.88889	intergenic	not near genes
1177	chr3L	3540093	3540277	chr3L	3540093	3540277	mdg3	5460	5259	10	184	2-8	69	1	5	intergenic	not near genes
1178	chr3L	3640350	3640561	chr3L	3640350	3640561	ZAM	8400	7966	23	211	9-14	68.26	7	2.875	intron	dar1
1179	chr3L	3649459	3649692	chr3L	3649459	3649692	ZAM	456	7962	13	233	4-9	75.8	13	0.928571	intron	dar1
1180	chr3L	3726724	3726989	chr3L	3726724	3726989	mdg3	172	5256	23	265	5-18	68.93	1	11.5	intron	CG32264
1181	chr3L	3798512	3798695	chr3L	3798512	3798695	1360	3380	35	8	183	5-3	63.42	0	8	intergenic	not near genes
1182	chr3L	3828041	3828271	chr3L	3828041	3828271	mdg3	5251	246	23	230	18-5	71.62	8	2.55556	intron	enc
1183	chr3L	3863122	3863348	chr3L	3863122	3863348	ZAM	7961	448	21	226	10-11	70.86	16	1.23529	intergenic	Awh
1184	chr3L	3928067	3928181	chr3L	3928067	3928181	Juan	42	4169	7	114	6-1	68	0	7	intron	Eip63F-1
1185	chr3L	3930175	3930395	chr3L	3930175	3930395	roo	404	8669	24	220	8-16	66.67	16	1.41176	intron	Eip63F-1
1186	chr3L	3935429	3935648	chr3L	3935429	3935648	roo	8671	404	22	219	13-9	67.82	1	11	5` UTR	Eip63F-2
1187	chr3L	3966821	3967015	chr3L	3966821	3967015	297	10	376	7	194	2-5	65.62	0	7	intergenic	CG12605
1188	chr3L	3971966	3972199	chr3L	3971966	3972199	ZAM	456	7962	25	233	9-16	72	11	2.08333	intergenic	CG43915
1189	chr3L	3991116	3991216	chr3L	3991116	3991216	mdg3	5254	102	13	100	9-4	67.74	0	13	3` UTR	scrt
1190	chr3L	4003981	4004163	chr3L	4003981	4004163	412	7086	479	16	182	8-8	65.5	6	2.28571	intron	CG14985
1191	chr3L	4107124	4107314	chr3L	4107124	4107314	ZAM	8375	1	36	190	9-27	71.46	10	3.27273	intergenic	Fit1
1192	chr3L	4154176	4154404	chr3L	4154176	4154404	opus	3	499	11	228	7-4	66.49	1	5.5	exon	nab
1193	chr3L	4202339	4202555	chr3L	4202339	4202555	ZAM	7964	441	29	216	18-11	68.53	20	1.38095	intron	CG43367
1194	chr3L	4411797	4412026	chr3L	4411797	4412026	ZAM	452	7962	15	229	4-11	66.8	8	1.66667	intron	DOR
1195	chr3L	4445902	4446043	chr3L	4445902	4446043	3S18	6092	5839	10	141	4-6	76.73	0	10	intergenic	CG12607
1196	chr3L	4467671	4467857	chr3L	4467671	4467857	ZAM	431	7984	20	186	11-9	67.63	10	1.81818	intergenic	CG32241
1197	chr3L	4533788	4533992	chr3L	4533788	4533992	springer	7506	369	13	204	4-9	63.85	0	13	intron	CG11353
1198	chr3L	4552737	4552931	chr3L	4552737	4552931	blood	7011	7355	28	194	17-11	68.1	3	7	3` UTR	CG11357
1199	chr3L	4579339	4579575	chr3L	4579339	4579575	ZAM	7960	457	21	236	12-9	71.59	24	0.84	intron	CG42540
1200	chr3L	4656663	4656786	chr3L	4656663	4656786	ZAM	8007	389	5	123	2-3	68.13	1	2.5	exon	axo
1201	chr3L	4669453	4669687	chr3L	4669453	4669687	opus	7500	112	22	234	11-11	70.36	0	22	intron	axo
1202	chr3L	4671036	4671132	chr3L	4671036	4671132	jockey	108	11	6	96	3-3	69.33	0	6	intron	axo
1203	chr3L	4754358	4754478	chr3L	4754358	4754478	Juan	4170	38	9	120	3-6	68.22	5	1.5	intron	Gef64C
1204	chr3L	4758321	4758514	chr3L	4758321	4758514	pogo	2077	15	8	193	4-4	61.75	6	1.14286	intron	Gef64C
1205	chr3L	4853711	4853795	chr3L	4853711	4853795	jockey	111	25	14	84	9-5	70.33	0	14	intergenic	CG32237
1206	chr3L	4854776	4854942	chr3L	4854776	4854942	ZAM	7965	390	17	166	12-5	65.53	6	2.42857	intergenic	CG32237
1207	chr3L	4899898	4900046	chr3L	4899898	4900046	ZAM	83	456	13	148	7-6	74.46	0	13	intron	CG13704
1208	chr3L	4900937	4901158	chr3L	4900937	4901158	jockey	4687	19	19	221	8-11	63.47	0	19	intergenic	CG13705
1209	chr3L	4935146	4935321	chr3L	4935146	4935321	ZAM	7959	8355	26	175	14-12	69.97	9	2.6	intergenic	Con
1210	chr3L	4936478	4936652	chr3L	4936478	4936652	ZAM	7960	393	18	174	9-9	68.33	0	18	intergenic	Con
1211	chr3L	5233991	5234116	chr3L	5240891	5241016	mdg3	5254	5396	11	125	5-6	69.39	0	11	intron	shep
1212	chr3L	5245893	5246081	chr3L	5252793	5252981	roo	409	42	7	188	1-6	68.29	4	1.4	intron	shep
1213	chr3L	5248059	5248278	chr3L	5254959	5255178	412	14	497	11	219	6-5	65.52	0	11	intron	shep
1214	chr3L	5259909	5259990	chr3L	5266809	5266890	Rt1a	107	19	5	81	4-1	66.27	1	2.5	intron	shep
1215	chr3L	5262020	5262253	chr3L	5268920	5269153	ZAM	455	7961	28	233	10-18	70.05	25	1.07692	intron	shep
1216	chr3L	5313067	5313152	chr3L	5319967	5320052	Juan	54	4154	8	85	5-3	68.92	0	8	intergenic	not near genes
1217	chr3L	5316598	5316750	chr3L	5323498	5323650	ZAM	8348	7975	13	152	8-5	69.69	6	1.85714	intergenic	not near genes
1218	chr3L	5370709	5370928	chr3L	5377609	5377828	ZAM	7963	8405	26	219	15-11	67.21	13	1.85714	intergenic	Ir64a
1219	chr3L	5372345	5372440	chr3L	5379245	5379340	roo	93	8662	10	95	3-7	71.2	3	2.5	exon	Ir64a
1220	chr3L	5431667	5431873	chr3L	5438567	5438773	ZAM	7962	8395	15	206	8-7	71.91	10	1.36364	intron	CG34391
1221	chr3L	5431774	5431988	chr3L	5438674	5438888	hopper	6	1408	25	214	16-9	62.75	0	25	intron	CG34391
1222	chr3L	5485693	5485919	chr3L	5492593	5492819	297	6581	382	15	226	8-7	66.62	0	15	intergenic	not near genes
1223	chr3L	5499413	5499480	chr3L	5506313	5506380	Doc	79	12	10	67	3-7	64.73	0	10	intron	CG34342
1224	chr3L	5509784	5510015	chr3L	5516684	5516915	blood	7009	380	26	231	11-15	68.54	0	26	intron	Lkr
1225	chr3L	5530739	5530818	chr3L	5537639	5537718	jockey	4685	4764	4	79	2-2	69.17	0	4	intergenic	CG13285
1226	chr3L	5780459	5780693	chr3L	5787359	5787593	roo	8663	413	22	234	13-9	74.51	0	22	intergenic	PGRP-LD
1227	chr3L	5828023	5828232	chr3L	5834923	5835132	roo	8675	400	21	209	10-11	66.6	8	2.33333	intron	vn
1228	chr3L	5866919	5867080	chr3L	5873819	5873980	ZAM	8356	7974	24	161	9-15	66.89	7	3	intron	CG18586
1229	chr3L	5959978	5960072	chr3L	5966878	5966972	jockey	4666	4760	8	94	3-5	70.59	2	2.66667	intergenic	CG10479
1230	chr3L	6019849	6020077	chr3L	6026749	6026977	ZAM	449	7960	15	228	5-10	74.13	6	2.14286	intergenic	CG32406
1231	chr3L	6040177	6040317	chr3L	6047077	6047217	mdg3	5340	245	11	140	8-3	75.88	2	3.66667	intergenic	not near genes
1232	chr3L	6113494	6113686	chr3L	6120394	6120586	roo	9053	20	14	192	9-5	69	1	7	intron	Ets65A
1233	chr3L	6264907	6265095	chr3L	6271807	6271995	ZAM	42	453	28	188	15-13	70.38	28	0.965517	intergenic	not near genes
1234	chr3L	6312343	6312575	chr3L	6319243	6319475	mdg3	5251	248	32	232	20-12	71.67	13	2.28571	intergenic	Or65a
1235	chr3L	6492267	6492469	chr3L	6499167	6499369	FB	6	17	8	202	4-4	65.5	0	8	intron	sfl
1236	chr3L	6538196	6538419	chr3L	6545096	6545319	mdg3	5263	251	36	223	22-14	67.56	13	2.57143	exon	sfl
1237	chr3L	6549935	6550163	chr3L	6556835	6557063	roo	408	8664	19	228	13-6	67.93	6	2.71429	intron	CG18769
1238	chr3L	6652567	6652790	chr3L	6659467	6659690	ZAM	449	7964	16	223	6-10	70.75	2	5.33333	intergenic	not near genes
1239	chr3L	6756557	6756729	chr3L	6763457	6763629	diver	67	23	11	172	6-5	64.36	0	11	intergenic	CG32392
1240	chr3L	6923340	6923559	chr3L	6930240	6930459	roo	398	8663	16	219	9-7	73.33	5	2.66667	intergenic	CG14820
1241	chr3L	6924094	6924263	chr3L	6930994	6931163	ZAM	7984	8375	15	169	8-7	68.8	3	3.75	intergenic	CG14820
1242	chr3L	6929615	6929849	chr3L	6936515	6936749	ZAM	455	7962	55	234	13-42	71.27	3	13.75	intergenic	CG14820
1243	chr3L	6935578	6935662	chr3L	6942478	6942562	jockey	4670	4754	18	84	10-8	66.22	0	18	intergenic	tow
1244	chr3L	6955629	6955811	chr3L	6962529	6962711	412	46	7545	19	182	13-6	72.04	8	2.11111	intron	sgl
1245	chr3L	7026750	7026957	chr3L	7033650	7033857	mdg3	5481	5257	19	207	10-9	67.23	0	19	intron	mp
1246	chr3L	7052224	7052440	chr3L	7059124	7059340	mdg3	5495	5262	22	216	10-12	67.61	7	2.75	3` UTR	CG8641
1247	chr3L	7124788	7125012	chr3L	7131688	7131912	ZAM	455	7970	24	224	11-13	70.17	15	1.5	intergenic	CG15829
1248	chr3L	7156621	7156810	chr3L	7163521	7163710	mdg3	5270	5476	26	189	17-9	70.69	7	3.25	intron	Dscam2
1249	chr3L	7229917	7230141	chr3L	7236817	7237041	ZAM	451	7966	29	224	11-18	73.17	8	3.22222	3` UTR	CG14829
1250	chr3L	7276125	7276361	chr3L	7283025	7283261	roo	408	8671	15	236	8-7	72.09	0	15	intron	unc-13-4A
1251	chr3L	7394875	7394987	chr3L	7401775	7401887	roo	9027	8736	8	112	4-4	73.83	0	8	intergenic	CG8562
1252	chr3L	7425484	7425559	chr3L	7432384	7432459	jockey	13	89	6	75	4-2	70.22	0	6	intron	CG42458
1253	chr3L	7431073	7431263	chr3L	7437973	7438163	springer	7136	7470	7	190	4-3	65.62	1	3.5	intron	CG42458
1254	chr3L	7471744	7471971	chr3L	7478644	7478871	ZAM	455	7967	26	227	10-16	75.85	26	0.962963	intergenic	CG43292
1255	chr3L	7512398	7512628	chr3L	7519298	7519528	ZAM	7963	454	21	230	10-11	66.95	15	1.3125	5` UTR	ltl
1256	chr3L	7600681	7600902	chr3L	7607581	7607802	gypsy	461	8	31	221	15-16	70.32	20	1.47619	intron	CG33275
1257	chr3L	7619728	7619960	chr3L	7626628	7626860	ZAM	457	7964	30	232	13-17	69.11	19	1.5	intron	CG33275
1258	chr3L	7653214	7653437	chr3L	7660114	7660337	mdg3	5258	246	25	223	18-7	71.31	12	1.92308	intron	CG32373
1259	chr3L	7774279	7774441	chr3L	7781179	7781341	S-element	69	1	5	162	1-4	74.14	6	0.714286	intron	CG32369
1260	chr3L	7799592	7799801	chr3L	7806492	7806701	opus	2	479	21	209	3-18	69.46	10	1.90909	intron	CG32369
1261	chr3L	7848730	7848938	chr3L	7855630	7855838	ZAM	8404	7973	9	208	3-6	71.41	7	1.125	intergenic	not near genes
1262	chr3L	7851810	7852002	chr3L	7858710	7858902	412	484	7081	19	192	8-11	69.93	22	0.826087	intergenic	not near genes
1263	chr3L	7862298	7862514	chr3L	7869198	7869414	ZAM	439	7962	19	216	7-12	72	4	3.8	intron	CG32365
1264	chr3L	7990863	7991048	chr3L	7997763	7997948	roo	8665	366	12	185	6-6	68	5	2	intron	nmo
1265	chr3L	8037878	8038052	chr3L	8044778	8044952	ZAM	449	52	9	174	5-4	67.41	0	9	intron	nmo
1266	chr3L	8064604	8064806	chr3L	8071504	8071706	diver	224	26	19	202	10-9	68.25	3	4.75	5` UTR	Ect4
1267	chr3L	8204359	8204597	chr3L	8211259	8211497	ZAM	7961	460	25	238	15-10	72.48	17	1.38889	intergenic	CG32364
1268	chr3L	8257804	8257896	chr3L	8264704	8264796	jockey	101	8	18	92	8-10	68.3	6	2.57143	intron	Dscam4
1269	chr3L	8369018	8369248	chr3L	8375918	8376148	mdg3	5498	5251	26	230	15-11	71.08	0	26	intron	ImpE1
1270	chr3L	8382760	8382996	chr3L	8389660	8389896	ZAM	7960	457	33	236	15-18	70.53	87	0.375	exon	ImpE1
1271	chr3L	8389242	8389471	chr3L	8396142	8396371	ZAM	7964	454	54	229	30-24	70.75	7	6.75	5` UTR	CG7120
1272	chr3L	8490713	8490934	chr3L	8497613	8497834	ZAM	456	7974	17	221	5-12	69.61	9	1.7	intron	CG43163
1273	chr3L	8521712	8521935	chr3L	8528612	8528835	ZAM	457	11	20	223	9-11	74.7	16	1.17647	intron	foi
1274	chr3L	8619237	8619460	chr3L	8626137	8626360	ZAM	454	8	16	223	13-3	70.79	1	8	intron	Zasp66
1275	chr3L	8620017	8620164	chr3L	8626917	8627064	ZAM	7	8337	25	147	18-7	64.27	13	1.78571	intron	Zasp66
1276	chr3L	8637488	8637690	chr3L	8644388	8644590	mdg3	5492	21	19	202	4-15	68.35	19	0.95	intergenic	Cpr66D
1277	chr3L	8651087	8651304	chr3L	8657987	8658204	ZAM	455	7977	34	217	15-19	70.14	14	2.26667	intergenic	not near genes
1278	chr3L	8652146	8652382	chr3L	8659046	8659282	ZAM	457	7960	26	236	10-16	73.26	10	2.36364	intergenic	not near genes
1279	chr3L	8669843	8670003	chr3L	8676743	8676903	ZAM	7964	383	21	160	16-5	67.94	9	2.1	intron	h
1280	chr3L	8691314	8691501	chr3L	8698214	8698401	ZAM	7996	8406	17	187	12-5	65.49	11	1.41667	intergenic	not near genes
1281	chr3L	8705196	8705391	chr3L	8712096	8712291	Juan	4198	4076	18	195	9-9	65.93	2	6	intergenic	not near genes
1282	chr3L	8820133	8820306	chr3L	8827033	8827206	gypsy	7401	6996	10	173	6-4	61.2	4	2	intergenic	dally
1283	chr3L	8842294	8842529	chr3L	8849194	8849429	ZAM	453	7962	10	235	6-4	72.13	23	0.416667	intron	dally
1284	chr3L	8855348	8855566	chr3L	8862248	8862466	ZAM	8401	7960	25	218	4-21	66.53	5	4.16667	intron	dally
1285	chr3L	8860133	8860309	chr3L	8867033	8867209	springer	7509	7139	17	176	5-12	66.47	4	3.4	intron	dally
1286	chr3L	8871154	8871336	chr3L	8878054	8878236	springer	7138	343	12	182	7-5	63.78	0	12	intron	dally
1287	chr3L	8937931	8938133	chr3L	8944831	8945033	mdg3	239	20	18	202	10-8	71.96	3	4.5	intron	CG43783
1288	chr3L	8940482	8940706	chr3L	8947382	8947606	ZAM	449	2	14	224	7-7	72.86	10	1.27273	intron	CG43783
1289	chr3L	9222041	9222253	chr3L	9228941	9229153	HMS-Beagle	229	6797	12	212	4-8	65.39	14	0.8	intergenic	not near genes
1290	chr3L	9226961	9227158	chr3L	9233861	9234058	Stalker2	383	7259	9	197	5-4	66.22	0	9	intergenic	CG4483
1291	chr3L	9244969	9245195	chr3L	9251869	9252095	ZAM	7963	450	19	226	15-4	68.03	9	1.9	intergenic	CG4477
1292	chr3L	9303817	9304033	chr3L	9310717	9310933	ZAM	18	456	34	216	12-22	69.39	14	2.26667	intergenic	not near genes
1293	chr3L	9317792	9318009	chr3L	9324692	9324909	ZAM	7968	7	44	217	23-21	68.79	19	2.2	intergenic	not near genes
1294	chr3L	9323773	9323992	chr3L	9330673	9330892	ZAM	456	14	24	219	7-17	68.69	9	2.4	intergenic	not near genes
1295	chr3L	9327317	9327514	chr3L	9334217	9334414	ZAM	450	7992	13	197	6-7	71.49	6	1.85714	intergenic	PGRP-LA
1296	chr3L	9329314	9329532	chr3L	9336214	9336432	ZAM	7970	449	17	218	12-5	69.29	0	17	intron	PGRP-LA
1297	chr3L	9373974	9374181	chr3L	9380874	9381081	springer	5	363	39	207	32-7	69.08	0	39	5` UTR	CR43481
1298	chr3L	9376183	9376376	chr3L	9383083	9383276	springer	39	7523	25	193	15-10	67.68	0	25	intergenic	CR43481
1299	chr3L	9390447	9390622	chr3L	9397347	9397522	S-element	1	1661	4	175	2-2	64.33	12	0.307692	intron	CG4080
1300	chr3L	9417935	9418097	chr3L	9424835	9424997	FB	62	1	7	162	2-5	71.33	5	1.16667	intron	CG3967
1301	chr3L	9424534	9424739	chr3L	9431434	9431639	springer	7522	26	17	205	10-7	69.45	7	2.125	intron	MTF-1
1302	chr3L	9425073	9425285	chr3L	9431973	9432185	412	7546	7070	10	212	5-5	74.8	1	5	intron	MTF-1
1303	chr3L	9440539	9440743	chr3L	9447439	9447643	roo	8675	395	15	204	11-4	72.22	0	15	intron	CG3529
1304	chr3L	9457946	9458109	chr3L	9464846	9465009	mdg3	5254	5434	17	163	4-13	76.31	4	3.4	intron	CG32043
1305	chr3L	9460162	9460385	chr3L	9467062	9467285	ZAM	445	7961	20	223	8-12	75.83	23	0.833333	intron	CG32043
1306	chr3L	9560555	9560665	chr3L	9567455	9567565	Juan	83	4215	8	110	3-5	69.25	2	2.66667	intron	CG42673
1307	chr3L	9574648	9574853	chr3L	9581548	9581753	ZAM	7976	8404	28	205	15-13	69.38	10	2.54545	exon	CG42673
1308	chr3L	9583201	9583399	chr3L	9590101	9590299	Burdock	232	11	5	198	2-3	69.6	0	5	intron	CG42673
1309	chr3L	9700644	9700841	chr3L	9707544	9707741	mdg3	5260	222	15	197	7-8	62.13	12	1.15385	exon	CG16711
1310	chr3L	9730483	9730633	chr3L	9737383	9737533	opus	7059	474	6	150	2-4	69.22	0	6	intron	CG42268
1311	chr3L	9794352	9794571	chr3L	9801252	9801471	roo	4	9065	14	219	6-8	67.38	7	1.75	intron	CG32052
1312	chr3L	9822512	9822732	chr3L	9829412	9829632	ZAM	453	10	15	220	9-6	70.75	3	3.75	intron	CG43897
1313	chr3L	9898026	9898240	chr3L	9904926	9905140	hobo	2932	5	16	214	8-8	72.04	11	1.33333	intergenic	nudE
1314	chr3L	9898957	9899188	chr3L	9905857	9906088	ZAM	7963	8409	22	231	17-5	70.91	5	3.66667	intergenic	nudE
1315	chr3L	10076607	10076821	chr3L	10083507	10083721	ZAM	1	438	30	214	24-6	66.16	9	3	intron	dpr6
1316	chr3L	10217553	10217745	chr3L	10224453	10224645	pogo	2062	1	7	192	1-6	67.91	3	1.75	intron	scramb1
1317	chr3L	10324402	10324625	chr3L	10331302	10331525	ZAM	454	7	21	223	9-12	73.94	11	1.75	intergenic	not near genes
1318	chr3L	10331484	10331610	chr3L	10338384	10338510	ZAM	8070	457	6	126	3-3	76.78	1	3	intergenic	not near genes
1319	chr3L	10338102	10338230	chr3L	10345002	10345130	Juan	14	4142	6	128	5-1	67.67	1	3	intergenic	not near genes
1320	chr3L	10384079	10384293	chr3L	10390979	10391193	roo	9064	7	10	214	7-3	69.47	7	1.25	intergenic	not near genes
1321	chr3L	10437127	10437348	chr3L	10444027	10444248	gypsy	9	462	26	221	13-13	70.56	0	26	intergenic	not near genes
1322	chr3L	10446626	10446842	chr3L	10453526	10453742	roo	402	1	10	216	4-6	73.53	2	3.33333	intergenic	not near genes
1323	chr3L	10468599	10468749	chr3L	10475499	10475649	FB	9	66	4	150	3-1	72	1	2	intergenic	not near genes
1324	chr3L	10523987	10524128	chr3L	10530887	10531028	ZAM	89	453	14	141	10-4	74.52	1	7	intron	A2bp1
1325	chr3L	10550016	10550234	chr3L	10556916	10557134	ZAM	455	7976	11	218	9-2	76.79	12	0.846154	intron	A2bp1
1326	chr3L	10568344	10568566	chr3L	10575244	10575466	ZAM	7965	457	22	222	11-11	68.85	11	1.83333	intron	A2bp1
1327	chr3L	10579549	10579646	chr3L	10586449	10586546	ZAM	7966	8063	11	97	5-6	69.76	0	11	intron	A2bp1
1328	chr3L	10639650	10639839	chr3L	10646550	10646739	copia	246	28	8	189	2-6	65	0	8	intron	CG32066
1329	chr3L	10641936	10642041	chr3L	10648836	10648941	Tirant	8109	100	7	105	3-4	71.71	0	7	intron	CG32066
1330	chr3L	10642061	10642162	chr3L	10648961	10649062	springer	7446	48	8	101	2-6	65.83	0	8	intron	CG32066
1331	chr3L	10699407	10699551	chr3L	10706307	10706451	mdg3	5496	5345	7	144	3-4	68.95	0	7	intergenic	not near genes
1332	chr3L	10761251	10761456	chr3L	10768151	10768356	Burdock	243	13	16	205	5-11	72.5	11	1.33333	intergenic	not near genes
1333	chr3L	10823736	10823916	chr3L	10830636	10830816	copia	3	210	19	180	18-1	68.39	0	19	intergenic	not near genes
1334	chr3L	10954918	10955152	chr3L	10961818	10962052	ZAM	7960	452	52	234	14-38	68.4	1	26	intergenic	not near genes
1335	chr3L	10956528	10956747	chr3L	10963428	10963647	mdg3	5260	5494	15	219	7-8	66.22	11	1.25	intergenic	not near genes
1336	chr3L	10972569	10972776	chr3L	10979469	10979676	ZAM	7975	8395	18	207	12-6	65.7	7	2.25	intergenic	klu
1337	chr3L	10978200	10978406	chr3L	10985100	10985306	mdg3	5488	5265	16	206	3-13	78.42	16	0.941176	intron	klu
1338	chr3L	10985915	10986132	chr3L	10992815	10993032	ZAM	13	453	23	217	13-10	72.61	34	0.657143	intron	klu
1339	chr3L	10993856	10994094	chr3L	11000756	11000994	ZAM	7959	458	27	238	13-14	69.73	23	1.125	intron	klu
1340	chr3L	11012047	11012216	chr3L	11018947	11019116	ZAM	7961	389	31	169	19-12	69.57	15	1.9375	intergenic	not near genes
1341	chr3L	11031778	11031935	chr3L	11038678	11038835	diver	179	5914	6	157	2-4	66.11	5	1	intron	CG43693
1342	chr3L	11082105	11082294	chr3L	11089005	11089194	mdg3	5470	5267	13	189	5-8	68.36	0	13	intron	JIL-1
1343	chr3L	11089606	11089686	chr3L	11096506	11096586	Juan	37	4145	4	80	2-2	64.34	0	4	intergenic	CG6279
1344	chr3L	11119112	11119291	chr3L	11126012	11126191	Juan	4196	18	4	179	1-3	63.67	0	4	intron	CG42575
1345	chr3L	11151578	11151810	chr3L	11158478	11158710	Stalker2	7247	405	40	232	26-14	71.53	2	13.3333	intron	CG32082
1346	chr3L	11176974	11177196	chr3L	11183874	11184096	mdg3	5251	5490	20	222	10-10	72.47	40	0.487805	5` UTR	GlcAT-P
1347	chr3L	11180900	11181077	chr3L	11187800	11187977	jockey	63	4976	24	177	15-9	64.55	4	4.8	intron	GlcAT-P
1348	chr3L	11250365	11250569	chr3L	11257265	11257469	1360	3380	10	5	204	1-4	57.73	14	0.333333	intergenic	scyl
1349	chr3L	11250852	11250995	chr3L	11257752	11257895	17.6	34	430	12	143	8-4	72.78	0	12	intergenic	scyl
1350	chr3L	11383552	11383738	chr3L	11390452	11390638	ZAM	442	7995	26	186	14-12	69.15	14	1.73333	intergenic	not near genes
1351	chr3L	11405485	11405945	chr3L	11412385	11412845	ZAM	7974	7	22	460	9-13	72.3	32	0.666667	intergenic	not near genes
1352	chr3L	11426603	11426780	chr3L	11433503	11433680	springer	7179	7499	17	177	10-7	63.77	0	17	intergenic	CG6149
1353	chr3L	11514330	11514544	chr3L	11521230	11521444	17.6	7415	7	28	214	4-24	70.29	0	28	3` UTR	CG11714
1354	chr3L	11574129	11574328	chr3L	11581029	11581228	Juan	4204	4031	9	199	2-7	71.55	0	9	intergenic	CG33270
1355	chr3L	11734167	11734398	chr3L	11741067	11741298	ZAM	458	4	25	231	13-12	74.91	15	1.5625	intron	CG6024
1356	chr3L	11754185	11754401	chr3L	11761085	11761301	mdg3	5256	237	12	216	6-6	74.33	10	1.09091	intron	CG6024
1357	chr3L	11812161	11812373	chr3L	11819061	11819273	17.6	8	7409	20	212	15-5	73.03	0	20	intron	CG5946
1358	chr3L	11870883	11871028	chr3L	11877783	11877928	3S18	6069	5812	18	145	2-16	67.07	0	18	intergenic	CG14128
1359	chr3L	12015839	12016056	chr3L	12022739	12022956	hobo	2937	4	24	217	5-19	66.25	0	24	intron	rols
1360	chr3L	12040588	12040771	chr3L	12047488	12047671	ZAM	8372	7967	18	183	9-9	71.04	9	1.8	intron	rols
1361	chr3L	12068690	12068909	chr3L	12075590	12075809	pogo	7	2095	12	219	7-5	65.72	0	12	intron	Sema-5c
1362	chr3L	12155335	12155545	chr3L	12162235	12162445	mdg3	5257	5484	31	210	18-13	70.26	20	1.47619	intron	CG9760
1363	chr3L	12158252	12158477	chr3L	12165152	12165377	micropia	453	4	39	225	14-25	66.58	1	19.5	3` UTR	Rh7
1364	chr3L	12166493	12166714	chr3L	12173393	12173614	roo	8671	408	17	221	7-10	68.74	7	2.125	intron	Rh7
1365	chr3L	12224499	12224715	chr3L	12231399	12231615	roo	409	13	22	216	7-15	69.85	8	2.44444	intron	app
1366	chr3L	12253851	12254080	chr3L	12260751	12260980	mdg3	245	5251	24	229	8-16	65.72	15	1.5	intron	app
1367	chr3L	12293165	12293310	chr3L	12300065	12300210	1360	24	3377	12	145	6-6	59.39	0	12	intergenic	not near genes
1368	chr3L	12294215	12294440	chr3L	12301115	12301340	hopper	1414	1398	18	225	10-8	61.22	12	1.38462	intergenic	not near genes
1369	chr3L	12303580	12303806	chr3L	12310480	12310706	ZAM	8409	7961	8	226	5-3	74.17	0	8	intergenic	not near genes
1370	chr3L	12352613	12352712	chr3L	12359513	12359612	jockey	4777	4678	9	99	4-5	70.44	2	3	intergenic	not near genes
1371	chr3L	12422800	12423021	chr3L	12429700	12429921	ZAM	15	459	18	221	10-8	72.48	24	0.72	intron	toe
1372	chr3L	12543091	12543320	chr3L	12549991	12550220	ZAM	7962	8414	19	229	12-7	72.95	15	1.1875	intron	sowah
1373	chr3L	12544038	12544170	chr3L	12550938	12551070	mdg3	5314	5463	8	132	5-3	61.08	9	0.8	intron	sowah
1374	chr3L	12697721	12697890	chr3L	12704621	12704790	ZAM	7964	392	22	169	15-7	63.7	14	1.46667	intron	mirr
1375	chr3L	12791987	12792092	chr3L	12798887	12798992	mdg3	5253	106	14	105	7-7	72.57	1	7	intron	Atg1
1376	chr3L	12793763	12793984	chr3L	12800663	12800884	copia	5	253	11	221	5-6	74.85	15	0.6875	intron	Atg1
1377	chr3L	12821690	12821898	chr3L	12828590	12828798	springer	7505	7143	21	208	9-12	70.89	12	1.61538	intron	CG10960
1378	chr3L	12825532	12825738	chr3L	12832432	12832638	ZAM	8410	19	19	206	14-5	67.86	11	1.58333	intron	CG10960
1379	chr3L	12853111	12853325	chr3L	12860011	12860225	ZAM	8413	13	16	214	8-8	68.29	5	2.66667	exon	CG32107
1380	chr3L	12856725	12856935	chr3L	12863625	12863835	Transpac	4930	5221	23	210	7-16	69.62	8	2.55556	intergenic	CG32107
1381	chr3L	12876945	12877099	chr3L	12883845	12883999	297	6613	350	6	154	3-3	75.45	5	1	intergenic	CG14120
1382	chr3L	12940049	12940232	chr3L	12946949	12947132	297	370	6604	8	183	3-5	69	9	0.8	intergenic	not near genes
1383	chr3L	13158178	13158389	chr3L	13165078	13165289	ZAM	7985	457	14	211	9-5	67.67	6	2	intergenic	not near genes
1384	chr3L	13286922	13287025	chr3L	13293822	13293925	mdg3	145	247	9	103	1-8	73.41	0	9	intergenic	CR43912
1385	chr3L	13455527	13455745	chr3L	13462427	13462645	ZAM	443	7964	22	218	11-11	73.73	16	1.29412	exon	CG10738
1386	chr3L	13468553	13469056	chr3L	13475453	13475956	springer	7155	7505	32	503	13-19	67.77	30	1.03226	intergenic	CG10089
1387	chr3L	13504313	13504535	chr3L	13511213	13511435	opus	6	496	25	222	11-14	71.87	4	5	3` UTR	Spt20
1388	chr3L	13560416	13560493	chr3L	13567316	13567393	jockey	110	32	6	77	3-3	65.11	0	6	intron	bru-3
1389	chr3L	13577870	13578056	chr3L	13584770	13584956	springer	7139	7479	23	186	14-9	69.56	13	1.64286	intron	bru-3
1390	chr3L	13581069	13581299	chr3L	13587969	13588199	ZAM	7965	456	23	230	14-9	73.27	39	0.575	intron	bru-3
1391	chr3L	13624919	13625115	chr3L	13631819	13632015	hobo	22	2931	18	196	9-9	70.3	6	2.57143	intron	bru-3
1392	chr3L	13660890	13660990	chr3L	13667790	13667890	Juan	1	81	7	100	2-5	74.57	3	1.75	intron	bru-3
1393	chr3L	13681760	13681987	chr3L	13688660	13688887	Stalker4	6959	410	6	227	2-4	70.44	2	2	intron	bru-3
1394	chr3L	13681815	13681898	chr3L	13688715	13688798	Stalker	6907	321	4	83	1-3	74.5	0	4	intron	bru-3
1395	chr3L	13707357	13707580	chr3L	13714257	13714480	flea	4764	256	16	223	9-7	70.79	4	3.2	intron	bru-3
1396	chr3L	13732798	13732898	chr3L	13739698	13739798	Rt1a	5060	4962	9	100	7-2	70.3	4	1.8	intron	bru-3
1397	chr3L	13793543	13793634	chr3L	13800443	13800534	copia	105	4883	9	91	5-4	69.7	0	9	intergenic	bru-3
1398	chr3L	13868598	13868698	chr3L	13875498	13875598	Doc	14	102	9	100	5-4	54.45	1	4.5	intron	dysc
1399	chr3L	13871599	13871725	chr3L	13878499	13878625	springer	23	304	4	126	1-3	79	0	4	intron	dysc
1400	chr3L	13872052	13872194	chr3L	13878952	13879094	ZAM	75	8402	11	142	6-5	73.64	7	1.375	intron	dysc
1401	chr3L	13878455	13878636	chr3L	13885355	13885536	jockey	24	4986	10	181	5-5	70.86	5	1.66667	intron	dysc
1402	chr3L	13900370	13900588	chr3L	13907270	13907488	pogo	2099	12	14	218	5-9	71.43	7	1.75	3` UTR	Rgl
1403	chr3L	13939809	13939996	chr3L	13946709	13946896	Max-element	8515	8255	14	187	3-11	64.81	0	14	intron	CG32137
1404	chr3L	13987515	13987680	chr3L	13994415	13994580	Juan	4176	14	7	165	5-2	68.38	0	7	intron	26-29-p
1405	chr3L	14013199	14013421	chr3L	14020099	14020321	3S18	4	6093	8	222	3-5	66.75	4	1.6	3` UTR	CG9007
1406	chr3L	14047394	14047588	chr3L	14054294	14054488	HMS-Beagle	6803	216	10	194	9-1	66.33	0	10	exon	CG32138
1407	chr3L	14087058	14087270	chr3L	14093958	14094170	297	6591	6967	14	212	7-7	67.62	9	1.4	intergenic	Fbp1
1408	chr3L	14171841	14172062	chr3L	14178741	14178962	roo	4	405	8	221	3-5	72.83	1	4	intergenic	D
1409	chr3L	14212476	14212695	chr3L	14219376	14219595	Transpac	5	304	19	219	13-6	68.49	0	19	intron	nuf
1410	chr3L	14213239	14213366	chr3L	14220139	14220266	S-element	89	1700	8	127	5-3	76.08	3	2	intron	nuf
1411	chr3L	14253366	14253591	chr3L	14260266	14260491	Quasimodo	2	7360	13	225	9-4	70.41	0	13	intergenic	not near genes
1412	chr3L	14265016	14265207	chr3L	14271916	14272107	3S18	5791	6094	17	191	8-9	68.08	6	2.42857	intergenic	fz
1413	chr3L	14331776	14332005	chr3L	14338676	14338905	ZAM	459	7969	17	229	7-10	69.26	7	2.125	intron	fz
1414	chr3L	14364117	14364330	chr3L	14371017	14371230	ZAM	436	7961	11	213	3-8	69.03	5	1.83333	intergenic	fz
1415	chr3L	14367482	14367686	chr3L	14374382	14374586	ZAM	8402	12	23	204	4-19	64.84	6	3.28571	intergenic	not near genes
1416	chr3L	14390059	14390184	chr3L	14396959	14397084	BS	5051	5056	6	125	4-2	59.11	3	1.5	intergenic	not near genes
1417	chr3L	14394831	14395036	chr3L	14401731	14401936	ZAM	16	8406	22	205	13-9	66.3	24	0.88	exon	CG3868
1418	chr3L	14485761	14485966	chr3L	14492661	14492866	ZAM	454	26	18	205	9-9	70.3	9	1.8	intron	bbg
1419	chr3L	14510474	14510625	chr3L	14517374	14517525	mdg3	5253	168	14	151	11-3	63.28	5	2.33333	intron	bbg
1420	chr3L	14523164	14523381	chr3L	14530064	14530281	297	6582	6963	18	217	11-7	68.26	10	1.63636	intron	bbg
1421	chr3L	14611028	14611256	chr3L	14617928	14618156	ZAM	8413	7962	19	228	5-14	73.37	10	1.72727	intron	shd
1422	chr3L	14625448	14625629	chr3L	14632348	14632529	diver	35	212	9	181	3-6	65.93	7	1.125	intergenic	RecQ5
1423	chr3L	14651768	14651956	chr3L	14658668	14658856	HMS-Beagle	10	7010	17	188	11-6	68.78	6	2.42857	intron	dlp
1424	chr3L	14689636	14689824	chr3L	14696536	14696724	ZAM	46	457	18	188	12-6	71.96	11	1.5	intergenic	CG13474
1425	chr3L	14708042	14708229	chr3L	14714942	14715129	roo	369	2	13	187	7-6	70.41	0	13	intron	ome
1426	chr3L	14722554	14722769	chr3L	14729454	14729669	mdg3	242	5262	18	215	6-12	67.3	0	18	intron	ome
1427	chr3L	14811053	14811168	chr3L	14817953	14818068	ZAM	23	8321	12	115	5-7	74.11	1	6	intron	CG17839
1428	chr3L	14811915	14812108	chr3L	14818815	14819008	297	31	6969	8	193	2-6	74.42	0	8	intron	CG17839
1429	chr3L	14851649	14851847	chr3L	14858549	14858747	jockey	4987	14	26	198	16-10	65.28	18	1.36842	intron	CG17839
1430	chr3L	14852413	14852642	chr3L	14859313	14859542	412	496	13	21	229	5-16	66.6	6	3	intron	CG17839
1431	chr3L	14892377	14892482	chr3L	14899277	14899382	Rt1b	4779	4675	23	105	16-7	68.52	0	23	intergenic	not near genes
1432	chr3L	15028158	15028380	chr3L	15035058	15035280	pogo	2094	3	25	222	8-17	68.43	3	6.25	intron	Sytbeta
1433	chr3L	15070237	15070458	chr3L	15077137	15077358	roo	9067	8667	18	221	9-9	70.04	11	1.5	intron	cp309
1434	chr3L	15083250	15083471	chr3L	15090150	15090371	ZAM	456	7976	15	221	5-10	68.31	0	15	intron	cp309
1435	chr3L	15202555	15202778	chr3L	15209455	15209678	ZAM	7982	453	26	223	16-10	71.95	16	1.52941	intergenic	CG6888
1436	chr3L	15208547	15208764	chr3L	15215447	15215664	springer	7151	7522	23	217	13-10	69.39	2	7.66667	intergenic	not near genes
1437	chr3L	15313445	15313647	chr3L	15320345	15320547	Max-element	268	8235	17	202	4-13	66.94	0	17	intergenic	not near genes
1438	chr3L	15330393	15330622	chr3L	15337293	15337522	ZAM	457	7967	39	229	16-23	69.66	11	3.25	exon	Toll-6
1439	chr3L	15390869	15391097	chr3L	15397769	15397997	ZAM	5	456	10	228	7-3	76.67	7	1.25	intergenic	not near genes
1440	chr3L	15398783	15398854	chr3L	15405683	15405754	ZAM	97	7988	6	71	4-2	69.11	0	6	intergenic	CG33259
1441	chr3L	15468676	15468863	chr3L	15475576	15475763	ZAM	43	453	11	187	2-9	71.39	2	3.66667	intergenic	CG7804
1442	chr3L	15590208	15590404	chr3L	15597108	15597304	springer	19	369	15	196	8-7	73.16	8	1.66667	intron	RhoGAP71E
1443	chr3L	15596596	15596689	chr3L	15603496	15603589	mdg3	5354	5261	9	93	5-4	70.15	0	9	intron	RhoGAP71E
1444	chr3L	15651909	15652077	chr3L	15658809	15658977	I-element	5300	4908	11	168	5-6	71.58	4	2.2	intergenic	Eig71Ee
1445	chr3L	15886672	15886817	chr3L	15893572	15893717	ZAM	454	8048	19	145	7-12	75.05	17	1.05556	intron	pHCl
1446	chr3L	15912590	15912805	chr3L	15919490	15919705	jockey	4983	9	14	215	8-6	69	6	2	intron	sff
1447	chr3L	15998102	15998270	chr3L	16005002	16005170	copia	5087	4892	7	168	2-5	62.95	2	2.33333	intergenic	CG5830
1448	chr3L	16006447	16006546	chr3L	16013347	16013446	mdg3	147	246	9	99	6-3	68.59	3	2.25	intergenic	mib1
1449	chr3L	16018787	16018973	chr3L	16025687	16025873	copia	248	4904	8	186	5-3	70.5	2	2.66667	intron	Notum
1450	chr3L	16019103	16019304	chr3L	16026003	16026204	ZAM	7978	8402	10	201	4-6	73.8	14	0.666667	intron	Notum
1451	chr3L	16040297	16040423	chr3L	16047197	16047323	ZAM	2	349	19	126	12-7	67.02	11	1.58333	intergenic	th
1452	chr3L	16121069	16121289	chr3L	16127969	16128189	1360	6	1	38	220	18-20	69.32	24	1.52	intron	Pgm
1453	chr3L	16124186	16124385	chr3L	16131086	16131285	diver	212	5905	14	199	6-8	64	14	0.933333	3` UTR	l(3)72Dh
1454	chr3L	16166240	16166403	chr3L	16173140	16173303	Juan	38	4215	13	163	6-7	66.26	12	1	intergenic	CG33795
1455	chr3L	16235903	16236126	chr3L	16242803	16243026	ZAM	451	5	31	223	10-21	69.23	12	2.38462	intergenic	not near genes
1456	chr3L	16273810	16273890	chr3L	16280710	16280790	F-element	14	94	9	80	4-5	55.18	0	9	exon	CG13064
1457	chr3L	16284012	16284170	chr3L	16290912	16291070	ZAM	442	7979	5	158	4-1	63.6	3	1.25	5` UTR	CG13045
1458	chr3L	16303014	16303249	chr3L	16309914	16310149	Stalker2	406	7244	45	235	24-21	72.33	3	11.25	5` UTR	CR32160
1459	chr3L	16303056	16303269	chr3L	16309956	16310169	ZAM	7962	8398	23	213	18-5	67.07	1	11.5	5` UTR	CR32160
1460	chr3L	16446245	16446385	chr3L	16453145	16453285	mdg3	23	5431	10	140	7-3	67.33	0	10	intron	CG33158
1461	chr3L	16446641	16446825	chr3L	16453541	16453725	ZAM	436	7991	13	184	6-7	64.67	9	1.3	intron	CG33158
1462	chr3L	16456178	16456376	chr3L	16463078	16463276	roo	8675	389	8	198	4-4	71.41	0	8	intron	CG33158
1463	chr3L	16482498	16482711	chr3L	16489398	16489611	ZAM	7964	8408	33	213	20-13	70.59	20	1.57143	intron	CG33158
1464	chr3L	16554496	16554721	chr3L	16561396	16561621	roo	8662	403	16	225	4-12	71	6	2.28571	intergenic	Mipp1
1465	chr3L	16623696	16623897	chr3L	16630596	16630797	412	7520	5	12	201	4-8	67.44	13	0.857143	intron	Abl
1466	chr3L	16676302	16676524	chr3L	16683202	16683424	mdg3	244	5259	18	222	4-14	70.52	4	3.6	intron	Lasp
1467	chr3L	16684567	16684639	chr3L	16691467	16691539	G2	2744	2825	7	72	4-3	61.53	0	7	intron	Lasp
1468	chr3L	16693599	16693823	chr3L	16700499	16700723	roo	8661	400	23	224	19-4	75.16	8	2.55556	intron	Lasp
1469	chr3L	16724380	16724569	chr3L	16731280	16731469	297	6596	6949	11	189	5-6	71.27	5	1.83333	intergenic	Dbp73D
1470	chr3L	16744756	16744966	chr3L	16751656	16751866	mdg3	5253	228	11	210	6-5	74.97	0	11	intergenic	not near genes
1471	chr3L	16789963	16790194	chr3L	16796863	16797094	412	1	496	35	231	26-9	69.47	0	35	intron	CG9674
1472	chr3L	16796393	16796624	chr3L	16803293	16803524	springer	7523	1	23	231	8-15	69.77	28	0.793103	intergenic	nudC
1473	chr3L	16815371	16815591	chr3L	16822271	16822491	ZAM	453	7972	22	220	9-13	70.42	32	0.666667	intron	CG13024
1474	chr3L	16815719	16815877	chr3L	16822619	16822777	springer	5	7454	25	158	14-11	72.27	5	4.16667	intron	CG13024
1475	chr3L	16822031	16822181	chr3L	16828931	16829081	ZAM	16	387	16	150	7-9	67.92	0	16	5` UTR	CG13024
1476	chr3L	16867047	16867244	chr3L	16873947	16874144	springer	3	7491	25	197	16-9	67.47	44	0.555556	intron	Lmpt
1477	chr3L	16868735	16868833	chr3L	16875635	16875733	jockey	118	19	9	98	6-3	76.74	3	2.25	intron	Lmpt
1478	chr3L	16876798	16876982	chr3L	16883698	16883882	copia	212	4870	21	184	8-13	71.52	0	21	intron	Lmpt
1479	chr3L	16912041	16912237	chr3L	16918941	16919137	roo	8690	7	11	196	7-4	67.33	6	1.57143	intron	Lmpt
1480	chr3L	16930483	16930708	chr3L	16937383	16937608	ZAM	446	7960	10	225	4-6	74.93	14	0.666667	intergenic	CG11905
1481	chr3L	17020877	17021077	chr3L	17027777	17027977	ZAM	8	433	17	200	13-4	69.22	12	1.30769	intron	CG7730
1482	chr3L	17039884	17040016	chr3L	17046784	17046916	mdg3	55	5456	4	132	3-1	67.5	3	1	intron	TpnC73F
1483	chr3L	17046748	17046975	chr3L	17053648	17053875	pogo	4	2100	12	227	7-5	68.22	1	6	intron	rogdi
1484	chr3L	17073882	17074116	chr3L	17080782	17081016	ZAM	7961	457	17	234	10-7	70.55	6	2.42857	intron	Rbp6
1485	chr3L	17089148	17089375	chr3L	17096048	17096275	ZAM	453	7965	17	227	7-10	75.22	15	1.0625	intron	Rbp6
1486	chr3L	17094732	17094925	chr3L	17101632	17101825	ZAM	8412	34	17	193	8-9	72.31	9	1.7	intron	Rbp6
1487	chr3L	17094851	17094925	chr3L	17101751	17101825	X-element	32	106	12	74	5-7	65.67	0	12	intron	Rbp6
1488	chr3L	17098442	17098636	chr3L	17105342	17105536	ZAM	8399	13	18	194	9-9	71.78	6	2.57143	intron	Rbp6
1489	chr3L	17105198	17105393	chr3L	17112098	17112293	ZAM	29	8409	17	195	10-7	67.06	17	0.944444	intron	Rbp6
1490	chr3L	17106388	17106614	chr3L	17113288	17113514	pogo	3	2098	4	226	2-2	75.16	3	1	intron	Rbp6
1491	chr3L	17129074	17129287	chr3L	17135974	17136187	jockey	4985	4675	16	213	9-7	71.5	14	1.06667	intron	Rbp6
1492	chr3L	17133333	17133554	chr3L	17140233	17140454	412	6	491	15	221	6-9	68.09	25	0.576923	intron	Rbp6
1493	chr3L	17143368	17143588	chr3L	17150268	17150488	ZAM	449	6	27	220	11-16	66.25	17	1.5	intron	Rbp6
1494	chr3L	17144436	17144634	chr3L	17151336	17151534	springer	14	366	10	198	8-2	68.6	9	1	intron	Rbp6
1495	chr3L	17158759	17158982	chr3L	17165659	17165882	mdg3	249	5261	17	223	6-11	71.88	8	1.88889	intron	Rbp6
1496	chr3L	17189678	17189892	chr3L	17196578	17196792	ZAM	441	7975	14	214	4-10	69.48	0	14	intron	Rbp6
1497	chr3L	17200660	17200863	chr3L	17207560	17207763	297	394	27	8	203	3-5	71.5	0	8	intron	Rbp6
1498	chr3L	17224919	17225062	chr3L	17231819	17231962	ZAM	378	7976	17	143	7-10	69.57	5	2.83333	intron	Rbp6
1499	chr3L	17256454	17256678	chr3L	17263354	17263578	Tabor	486	6	18	224	11-7	68.37	1	9	intron	CR43870
1500	chr3L	17260710	17260811	chr3L	17267610	17267711	mdg3	5252	5353	21	101	14-7	68.57	1	10.5	intergenic	CG13723
1501	chr3L	17285043	17285248	chr3L	17291943	17292148	ZAM	450	7984	23	205	8-15	66.41	6	3.28571	intergenic	not near genes
1502	chr3L	17286537	17286730	chr3L	17293437	17293630	ZAM	413	7960	21	193	9-12	69.24	11	1.75	intergenic	not near genes
1503	chr3L	17290704	17290931	chr3L	17297604	17297831	roo	405	8662	24	227	10-14	70.08	11	2	intergenic	not near genes
1504	chr3L	17334227	17334446	chr3L	17341127	17341346	ZAM	8408	4	31	219	10-21	71.98	6	4.42857	exon	CG13727
1505	chr3L	17345436	17345600	chr3L	17352336	17352500	412	473	7098	10	164	6-4	66.13	0	10	intergenic	Mip
1506	chr3L	17388048	17388262	chr3L	17394948	17395162	ZAM	458	21	12	214	5-7	72.72	17	0.666667	intergenic	blot
1507	chr3L	17437067	17437238	chr3L	17443967	17444138	opus	469	7033	9	171	2-7	74.15	1	4.5	intron	CG18265
1508	chr3L	17451526	17451609	chr3L	17458426	17458509	I-element	5265	5348	9	83	5-4	70.44	1	4.5	intergenic	not near genes
1509	chr3L	17496142	17496310	chr3L	17503042	17503210	copia	14	194	8	168	6-2	62.92	2	2.66667	intron	Oatp74D
1510	chr3L	17563237	17563474	chr3L	17570137	17570374	ZAM	459	7961	34	237	6-28	70.39	21	1.54545	intron	Eip74EF
1511	chr3L	17569423	17569656	chr3L	17576323	17576556	ZAM	7961	455	30	233	20-10	71.95	35	0.833333	intron	Eip74EF
1512	chr3L	17626879	17627109	chr3L	17633779	17634009	ZAM	7965	456	14	230	10-4	66.05	10	1.27273	exon	CG7497
1513	chr3L	17637438	17637643	chr3L	17644338	17644543	springer	3	7499	17	205	10-7	67.45	8	1.88889	intron	Pep
1514	chr3L	17702775	17703002	chr3L	17709675	17709902	ZAM	454	4	18	227	2-16	72.11	5	3	intron	Ccn
1515	chr3L	17705719	17705949	chr3L	17712619	17712849	ZAM	453	7962	25	230	11-14	69.81	22	1.08696	intron	Ccn
1516	chr3L	17708439	17708567	chr3L	17715339	17715467	Ivk	5292	5276	6	128	2-4	71.78	0	6	intron	Ccn
1517	chr3L	17735489	17735671	chr3L	17742389	17742571	mdg1	22	390	11	182	5-6	66.12	0	11	intron	Ccn
1518	chr3L	17761157	17761344	chr3L	17768057	17768244	Quasimodo	2	7326	9	187	5-4	72.22	0	9	intergenic	not near genes
1519	chr3L	17780036	17780229	chr3L	17786936	17787129	pogo	2089	27	5	193	3-2	75.07	5	0.833333	intergenic	not near genes
1520	chr3L	17794739	17794910	chr3L	17801639	17801810	Juan	4171	8	12	171	5-7	68.94	2	4	intron	NUCB1
1521	chr3L	17816292	17816524	chr3L	17823192	17823424	ZAM	457	7964	23	232	14-9	70.09	15	1.4375	intergenic	Ir75b
1522	chr3L	17822678	17822905	chr3L	17829578	17829805	mdg3	5252	245	20	227	15-5	68.43	5	3.33333	exon	Grd
1523	chr3L	17891170	17891366	chr3L	17898070	17898266	hopper	17	1399	14	196	3-11	64.76	20	0.666667	intergenic	Tsp74F
1524	chr3L	17891721	17891898	chr3L	17898621	17898798	1360	3358	19	22	177	8-14	67.58	7	2.75	intergenic	Tsp74F
1525	chr3L	17905746	17905835	chr3L	17912646	17912735	Doc	4307	4396	9	89	4-5	69.78	2	3	intergenic	CG14353
1526	chr3L	17939651	17939882	chr3L	17946551	17946782	ZAM	7964	456	29	231	23-6	72.32	19	1.45	intergenic	CG43174
1527	chr3L	17998910	17999119	chr3L	18005810	18006019	ZAM	8414	7971	17	209	11-6	69.41	5	2.83333	intron	Eip75B
1528	chr3L	18030301	18030514	chr3L	18037201	18037414	ZAM	452	7978	17	213	10-7	74.86	3	4.25	intron	Eip75B
1529	chr3L	18040732	18040817	chr3L	18047632	18047717	copia	4938	5050	6	85	5-1	70.22	0	6	intron	Eip75B
1530	chr3L	18053593	18053825	chr3L	18060493	18060725	mdg3	5251	248	12	232	10-2	70.05	10	1.09091	5` UTR	Eip75B
1531	chr3L	18143771	18143849	chr3L	18150671	18150749	Doc	79	1	13	78	5-8	69.95	0	13	intron	CG7330
1532	chr3L	18164051	18164265	chr3L	18170951	18171165	gypsy	7437	6991	19	214	5-14	67.79	18	1	intron	W
1533	chr3L	18176768	18176997	chr3L	18183668	18183897	mdg3	16	247	6	229	1-5	73.78	0	6	intron	W
1534	chr3L	18190066	18190267	chr3L	18196966	18197167	mdg3	5252	218	15	201	10-5	68.67	6	2.14286	intergenic	not near genes
1535	chr3L	18202317	18202531	chr3L	18209217	18209431	Tc3	313	237	4	214	3-1	68.5	0	4	intergenic	not near genes
1536	chr3L	18277540	18277728	chr3L	18284440	18284628	ZAM	454	43	12	188	6-6	67.33	8	1.33333	intergenic	not near genes
1537	chr3L	18506698	18506794	chr3L	18513598	18513694	jockey	100	3	6	96	1-5	73.78	1	3	intergenic	not near genes
1538	chr3L	18638165	18638333	chr3L	18645065	18645233	ZAM	453	8024	10	168	3-7	73.67	4	2	intron	MYPT-75D
1539	chr3L	18642728	18642947	chr3L	18649628	18649847	FB	1	5	9	219	5-4	73.63	9	0.9	intron	MYPT-75D
1540	chr3L	18645649	18645822	chr3L	18652549	18652722	roo	8664	352	9	173	4-5	67.11	5	1.5	intron	MYPT-75D
1541	chr3L	18661170	18661333	chr3L	18668070	18668233	diver	221	5950	10	163	4-6	63.93	1	5	3` UTR	CG42495
1542	chr3L	18717050	18717281	chr3L	18723950	18724181	297	395	6581	18	231	4-14	66.52	1	9	5` UTR	CR43985
1543	chr3L	18725766	18725988	chr3L	18732666	18732888	ZAM	8408	1	24	222	3-21	71.64	3	6	intergenic	not near genes
1544	chr3L	18729889	18730094	chr3L	18736789	18736994	roo	8679	9063	18	205	10-8	67.96	2	6	intergenic	not near genes
1545	chr3L	18734931	18735091	chr3L	18741831	18741991	Ivk	5363	50	6	160	2-4	63.11	0	6	intergenic	CG6885
1546	chr3L	18808363	18808521	chr3L	18815263	18815421	pogo	8	2034	4	158	2-2	70.66	3	1	intron	CG14073
1547	chr3L	18818942	18819151	chr3L	18825842	18826051	mdg3	5486	5260	8	209	4-4	73	0	8	intron	Cat
1548	chr3L	18839177	18839364	chr3L	18846077	18846264	17.6	6940	462	14	187	8-6	67.19	0	14	5` UTR	Indy
1549	chr3L	18845112	18845344	chr3L	18852012	18852244	ZAM	7960	453	8	232	5-3	73.33	10	0.727273	intergenic	not near genes
1550	chr3L	18933455	18933673	chr3L	18940355	18940573	flea	4770	257	13	218	7-6	68.72	6	1.85714	intron	CG32204
1551	chr3L	18943623	18943855	chr3L	18950523	18950755	ZAM	455	7962	26	232	10-16	70.41	18	1.36842	intergenic	CG6836
1552	chr3L	18970955	18971183	chr3L	18977855	18978083	ZAM	8413	7962	46	228	22-24	72.13	3	11.5	intergenic	not near genes
1553	chr3L	19077953	19078066	chr3L	19084853	19084966	FB	13	99	4	113	2-2	80.67	1	2	intron	Mkp3
1554	chr3L	19105875	19106108	chr3L	19112775	19113008	blood	7008	378	37	233	24-13	68.77	35	1.02778	intron	CG14082
1555	chr3L	19109615	19109775	chr3L	19116515	19116675	blood	341	33	10	160	3-7	67.86	3	2.5	intron	CG14082
1556	chr3L	19181580	19181787	chr3L	19188480	19188687	ZAM	448	7979	16	207	10-6	68.21	1	8	intron	fz2
1557	chr3L	19236733	19236955	chr3L	19243633	19243855	copia	1	250	18	222	12-6	69.41	11	1.5	intergenic	not near genes
1558	chr3L	19332386	19332591	chr3L	19339286	19339491	Tc1	1627	12	11	205	2-9	63.88	0	11	intergenic	pip
1559	chr3L	19361200	19361386	chr3L	19368100	19368286	ZAM	8373	3	15	186	5-10	68.49	10	1.36364	intron	CG32206
1560	chr3L	19361459	19361617	chr3L	19368359	19368517	roo	342	4	17	158	8-9	70.08	0	17	intron	CG32206
1561	chr3L	19372826	19373052	chr3L	19379726	19379952	ZAM	4	453	20	226	11-9	69.47	17	1.11111	intron	CG32206
1562	chr3L	19389970	19390047	chr3L	19396870	19396947	Doc	31	108	10	77	4-6	71.53	0	10	intron	CG32206
1563	chr3L	19406610	19406705	chr3L	19413510	19413605	springer	7232	7137	11	95	5-6	71.52	3	2.75	intergenic	CG32206
1564	chr3L	19419034	19419184	chr3L	19425934	19426084	ZAM	7962	8333	21	150	13-8	71.21	7	2.625	intergenic	CR32205
1565	chr3L	19427727	19427955	chr3L	19434627	19434855	springer	3	7497	16	228	13-3	71	4	3.2	intergenic	not near genes
1566	chr3L	19455810	19456042	chr3L	19462710	19462942	ZAM	2	457	21	232	10-11	75.11	8	2.33333	intergenic	CG14095
1567	chr3L	19490052	19490266	chr3L	19496952	19497166	ZAM	457	7982	22	214	7-15	68.36	16	1.29412	5` UTR	CG9449
1568	chr3L	19516534	19516616	chr3L	19523434	19523516	Stalker2	99	7266	9	82	6-3	70.44	0	9	intron	Cpr76Bc
1569	chr3L	19535218	19535438	chr3L	19542118	19542338	roo	407	8671	13	220	9-4	75.33	10	1.18182	exon	CG9279
1570	chr3L	19617559	19617775	chr3L	19624459	19624675	297	6586	387	12	216	9-3	73.83	1	6	3` UTR	wnd
1571	chr3L	19641217	19641453	chr3L	19648117	19648353	ZAM	7960	457	39	236	30-9	74.38	20	1.85714	exon	Oat
1572	chr3L	19642328	19642555	chr3L	19649228	19649455	297	394	3	24	227	11-13	70.86	14	1.6	intron	Oat
1573	chr3L	19672221	19672405	chr3L	19679121	19679305	ZAM	8373	7968	15	184	2-13	66.67	4	3	intergenic	not near genes
1574	chr3L	19683878	19684096	chr3L	19690778	19690996	ZAM	7961	8402	37	218	27-10	67.53	27	1.32143	exon	verm
1575	chr3L	19779201	19779393	chr3L	19786101	19786293	Tabor	21	479	19	192	17-2	62.42	0	19	intron	CG42637
1576	chr3L	19796391	19796595	chr3L	19803291	19803495	flea	5000	4768	16	204	3-13	74.75	5	2.66667	exon	Ir76a
1577	chr3L	19862791	19862974	chr3L	19869691	19869874	mdg3	5462	5262	28	183	11-17	72.26	7	3.5	intron	Rab8
1578	chr3L	19944234	19944417	chr3L	19951134	19951317	Ivk	14	5354	14	183	11-3	69.9	0	14	intron	Ac76E
1579	chr3L	19954668	19954884	chr3L	19961568	19961784	hobo	3	2932	29	216	14-15	70.48	25	1.11538	intron	Ac76E
1580	chr3L	19985721	19985954	chr3L	19992621	19992854	ZAM	456	7962	25	233	12-13	72.56	10	2.27273	intron	Nca
1581	chr3L	20007462	20007663	chr3L	20014362	20014563	roo	396	8679	17	201	9-8	64.2	15	1.0625	exon	kug
1582	chr3L	20045057	20045205	chr3L	20051957	20052105	mdg3	191	5279	9	148	5-4	65.55	7	1.125	intergenic	not near genes
1583	chr3L	20057138	20057201	chr3L	20064038	20064101	F-element	88	25	8	63	3-5	54.08	0	8	intron	sNPF-R
1584	chr3L	20071821	20071975	chr3L	20078721	20078875	roo	8676	9041	8	154	3-5	69.75	0	8	intron	sNPF-R
1585	chr3L	20151038	20151295	chr3L	20157938	20158195	mdg3	5493	5264	10	257	2-8	73.67	0	10	intron	CG42674
1586	chr3L	20168764	20168987	chr3L	20175664	20175887	roo	405	2	14	223	6-8	78.86	9	1.4	intron	CG42674
1587	chr3L	20190652	20190838	chr3L	20197552	20197738	springer	7497	20	19	186	8-11	68.88	8	2.11111	5` UTR	CG42674
1588	chr3L	20190655	20190858	chr3L	20197555	20197758	gypsy6	7777	7419	5	203	4-1	76.13	13	0.357143	5` UTR	CG42674
1589	chr3L	20194783	20195009	chr3L	20201683	20201909	ZAM	8414	7965	19	226	10-9	71.54	21	0.863636	intergenic	CG42833
1590	chr3L	20226563	20226759	chr3L	20233463	20233659	opus	26	490	13	196	5-8	67.95	0	13	3` UTR	CG17233
1591	chr3L	20241643	20241859	chr3L	20248543	20248759	Burdock	6385	9	17	216	6-11	75.53	0	17	intron	CG13814
1592	chr3L	20248417	20248622	chr3L	20255317	20255522	Stalker4	389	2	8	205	4-4	63.91	10	0.727273	intron	CG13814
1593	chr3L	20248471	20248606	chr3L	20255371	20255506	Stalker	7184	16	12	135	6-6	71.94	5	2	intron	CG13814
1594	chr3L	20248900	20249012	chr3L	20255800	20255912	springer	104	7507	10	112	4-6	71.2	1	5	intron	CG13814
1595	chr3L	20248939	20249000	chr3L	20255839	20255900	gypsy6	316	7778	4	61	2-2	70.17	0	4	intron	CG13814
1596	chr3L	20253894	20254102	chr3L	20260794	20261002	ZAM	7981	8412	20	208	13-7	67.13	15	1.25	intron	rdgC
1597	chr3L	20265086	20265249	chr3L	20271986	20272149	297	32	6616	6	163	3-3	64.78	3	1.5	intron	gogo
1598	chr3L	20279245	20279459	chr3L	20286145	20286359	ZAM	8411	7974	15	214	5-10	69.78	7	1.875	intron	gogo
1599	chr3L	20536513	20536745	chr3L	20543413	20543645	opus	7115	498	13	232	1-12	71.33	2	4.33333	intergenic	Rcd2
1600	chr3L	20548082	20548254	chr3L	20554982	20555154	mdg3	5253	5442	11	172	5-6	64.73	2	3.66667	intergenic	not near genes
1601	chr3L	20598067	20598289	chr3L	20604967	20605189	copia	2	251	10	222	6-4	70.4	7	1.25	intron	knrl
1602	chr3L	20613241	20613735	chr3L	20620141	20620635	ZAM	8409	7958	55	494	29-26	69.32	80	0.679012	5` UTR	knrl
1603	chr3L	20624020	20624117	chr3L	20630920	20631017	ZAM	96	7961	9	97	5-4	68.44	4	1.8	intergenic	not near genes
1604	chr3L	20638291	20638514	chr3L	20645191	20645414	ZAM	6	452	22	223	13-9	67.85	7	2.75	intergenic	not near genes
1605	chr3L	20719400	20719482	chr3L	20726300	20726382	F-element	4657	4575	5	82	2-3	72.8	1	2.5	intergenic	CR43945
1606	chr3L	20759305	20759471	chr3L	20766205	20766371	Ivk	5353	28	8	166	1-7	66.34	4	1.6	intergenic	CG4074
1607	chr3L	20780326	20780410	chr3L	20787226	20787310	Juan	4123	4207	7	84	4-3	67.33	0	7	exon	CG11396
1608	chr3L	20800874	20801107	chr3L	20807774	20808007	ZAM	7963	457	26	233	19-7	69.95	31	0.8125	exon	CG3634
1609	chr3L	20841961	20842134	chr3L	20848861	20849034	I-element	5350	4898	19	173	11-8	65.3	7	2.375	intron	CG32432
1610	chr3L	20902284	20902482	chr3L	20909184	20909382	ZAM	453	8	11	198	7-4	69.64	10	1	intergenic	CG11458
1611	chr3L	20908228	20908401	chr3L	20915128	20915301	I-element	20	5329	8	173	3-5	66.67	15	0.5	intergenic	CR43930
1612	chr3L	20925228	20925385	chr3L	20932128	20932285	ZAM	8347	7	23	157	7-16	69.07	24	0.92	intron	fng
1613	chr3L	21063275	21063491	chr3L	21070175	21070391	roo	398	8666	21	216	5-16	66.03	24	0.84	intron	siz
1614	chr3L	21067558	21067830	chr3L	21074458	21074730	ZAM	7960	8410	22	272	17-5	73.06	20	1.04762	exon	siz
1615	chr3L	21068155	21068362	chr3L	21075055	21075262	ZAM	10	440	21	207	15-6	69.75	7	2.625	3` UTR	siz
1616	chr3L	21110575	21110805	chr3L	21117475	21117705	ZAM	455	7964	27	230	8-19	68.96	9	2.7	intron	ko
1617	chr3L	21120826	21121041	chr3L	21127726	21127941	roo	411	17	12	215	6-6	71.22	1	6	intron	ko
1618	chr3L	21180435	21180659	chr3L	21187335	21187559	hopper	1	4	9	224	4-5	70.15	7	1.125	intron	CG42337
1619	chr3L	21185463	21185685	chr3L	21192363	21192585	ZAM	11	456	25	222	16-9	65.68	9	2.5	intron	CG42337
1620	chr3L	21197833	21198027	chr3L	21204733	21204927	springer	7150	7498	6	194	3-3	71.89	12	0.461538	intron	CG10512
1621	chr3L	21395922	21396087	chr3L	21402822	21402987	ZAM	8351	5	16	165	6-10	70.04	8	1.77778	intron	rgn
1622	chr3L	21422030	21422257	chr3L	21428930	21429157	ZAM	1	8413	13	227	6-7	76.72	7	1.625	intron	barc
1623	chr3L	21707543	21707750	chr3L	21714443	21714650	ZAM	7965	433	27	207	19-8	70.82	12	2.07692	intergenic	not near genes
1624	chr3L	21731345	21731563	chr3L	21738245	21738463	ZAM	7958	437	15	218	11-4	75.87	23	0.625	exon	CG14567
1625	chr3L	21747572	21747673	chr3L	21754472	21754573	jockey	111	9	10	101	5-5	80.2	1	5	intron	Syn1
1626	chr3L	21749763	21749996	chr3L	21756663	21756896	ZAM	7963	457	30	233	19-11	71.38	28	1.03448	intron	Syn1
1627	chr3L	21787818	21788027	chr3L	21794718	21794927	mdg3	5252	226	21	209	14-7	69.91	12	1.61538	intergenic	not near genes
1628	chr3L	21802313	21802490	chr3L	21809213	21809390	412	490	7102	12	177	3-9	71.72	6	1.71429	intron	eg
1629	chr3L	21868140	21868333	chr3L	21875040	21875233	297	388	31	7	193	4-3	76.86	5	1.16667	intron	mub
1630	chr3L	21888247	21888447	chr3L	21895147	21895347	gypsy	1	433	17	200	10-7	73.45	6	2.42857	intron	mub
1631	chr3L	21984406	21984627	chr3L	21991306	21991527	ZAM	8405	7961	19	221	6-13	69.51	13	1.35714	intergenic	not near genes
1632	chr3L	22043269	22043503	chr3L	22050169	22050403	ZAM	457	7962	21	234	7-14	72.41	6	3	intron	Oct-TyrR
1633	chr3L	22086801	22087023	chr3L	22093701	22093923	ZAM	7963	446	37	222	30-7	72.18	23	1.54167	intergenic	not near genes
1634	chr3L	22088975	22089205	chr3L	22095875	22096105	ZAM	452	7961	30	230	8-22	69.2	16	1.76471	intergenic	not near genes
1635	chr3L	22092207	22092423	chr3L	22099107	22099323	ZAM	11	457	23	216	17-6	68.75	35	0.638889	intergenic	not near genes
1636	chr3L	22176985	22177208	chr3L	22183885	22184108	ZAM	7970	454	27	223	14-13	71.97	16	1.58824	5` UTR	olf413
1637	chr3L	22208176	22208380	chr3L	22215076	22215280	jockey	4985	4770	12	204	11-1	69.83	6	1.71429	intron	olf413
1638	chr3L	22231843	22232070	chr3L	22238743	22238970	ZAM	8410	7960	17	227	8-9	72.51	9	1.7	intron	olf413
1639	chr3L	22237429	22237646	chr3L	22244329	22244546	gypsy	6	7443	12	217	4-8	70.39	15	0.75	intergenic	olf413
1640	chr3L	22241266	22241487	chr3L	22248166	22248387	ZAM	7961	8405	27	221	18-9	70.89	16	1.58824	intergenic	not near genes
1641	chr3L	22248362	22248586	chr3L	22255262	22255486	blood	7017	378	19	224	14-5	67.75	11	1.58333	intergenic	Rich
1642	chr3L	22261937	22262166	chr3L	22268837	22269066	ZAM	454	7964	29	229	10-19	70.37	21	1.31818	intron	Csp
1643	chr3L	22269731	22269917	chr3L	22276631	22276817	ZAM	8001	8407	18	186	11-7	73.96	1	9	intergenic	srpk79D
1644	chr3L	22282268	22282496	chr3L	22289168	22289396	ZAM	1	8414	30	228	24-6	68.71	8	3.33333	exon	Aats-ile
1645	chr3L	22307360	22307456	chr3L	22314260	22314356	ZAM	6	102	16	96	6-10	70.12	4	3.2	intron	Ten-m
1646	chr3L	22357848	22358070	chr3L	22364748	22364970	ZAM	5	8412	24	222	13-11	67.53	14	1.6	intron	Ten-m
1647	chr3L	22364052	22364277	chr3L	22370952	22371177	ZAM	454	6	25	225	10-15	71.01	8	2.77778	intron	Ten-m
1648	chr3L	22373597	22373798	chr3L	22380497	22380698	FB	11	13	5	201	3-2	73.07	13	0.357143	intron	Ten-m
1649	chr3L	22413126	22413345	chr3L	22420026	22420245	ZAM	14	456	17	219	9-8	72.24	25	0.653846	intergenic	not near genes
1650	chr3L	22441857	22442088	chr3L	22448757	22448988	ZAM	7959	8413	19	231	7-12	77.02	23	0.791667	intergenic	not near genes
1651	chr3L	22463293	22463378	chr3L	22470193	22470278	mdg1	7141	381	8	85	3-5	68.83	0	8	intergenic	CG11438
1652	chr3L	22475062	22475277	chr3L	22481962	22482177	ZAM	4	8404	24	215	16-8	69.64	8	2.66667	intergenic	not near genes
1653	chr3L	22530577	22530771	chr3L	22537477	22537671	I-element	2	5329	15	194	7-8	71.2	13	1.07143	intergenic	not near genes
1654	chr3L	22563824	22564005	chr3L	22570724	22570905	blood	7018	7348	25	181	15-10	68.13	5	4.16667	intergenic	not near genes
1655	chr3L	22578578	22578728	chr3L	22585478	22585628	mdg1	7085	7427	12	150	5-7	68.17	5	2	intron	CG14459
1656	chr3L	22716890	22717104	chr3L	22723790	22724004	springer	367	7136	17	214	13-4	65.96	5	2.83333	intergenic	CG14451
1657	chr3L	22787736	22787954	chr3L	22794636	22794854	diver	224	5898	17	218	10-7	65.84	20	0.809524	intergenic	jim
1658	chr3L	22833047	22833277	chr3L	22839947	22840177	ZAM	7964	455	24	230	17-7	70.53	12	1.84615	intergenic	CG11226
1659	chr3L	22863759	22863950	chr3L	22870659	22870850	Juan	4199	4035	11	191	7-4	69.64	14	0.733333	intron	Arf79F
1660	chr3L	22867493	22867703	chr3L	22874393	22874603	mdg3	5257	232	20	210	9-11	69.17	8	2.22222	3` UTR	Chro
1661	chr3L	22882263	22882496	chr3L	22889163	22889396	ZAM	2	458	12	233	8-4	78.72	13	0.857143	intron	slif
1662	chr3L	22927847	22928065	chr3L	22934747	22934965	hobo	2937	6	24	218	13-11	71.58	14	1.6	intergenic	not near genes
1663	chr3L	23120922	23121134	chr3L	23127822	23128034	hobo	4	2929	9	212	6-3	69.48	6	1.28571	intron	CG33217
1664	chr3L	23228703	23229256	chr3L	23235603	23236156	HMS-Beagle2	7104	20	13	553	2-11	72.98	145	0.0890411	intron	nAcRalpha-80B
1665	chr3L	23347668	23347763	chr3L	23354568	23354663	F-element	108	12	9	95	4-5	67.26	0	9	intergenic	not near genes
1666	chr3L	23484956	23485178	chr3L	23491856	23492078	diver	5890	220	4	222	2-2	75.67	2	1.33333	intergenic	not near genes
1667	chr3L	23877139	23877242	chr3L	23884039	23884142	copia	4868	102	10	103	5-5	71.67	3	2.5	intron	CG40470
1668	chr3L	24033808	24034027	chr3L	24040708	24040927	Stalker2	7645	4	12	219	1-11	72.56	7	1.5	intergenic	not near genes
1669	chr3L	24265152	24265224	chr3L	24272052	24272124	gypsy11	68	4157	7	72	3-4	72.95	0	7	intron	Snap25
1670	chr3L	24393186	24393292	chr3L	24400086	24400192	mdg3	142	248	8	106	4-4	76.17	1	4	intron	nvd
1671	chr3R	60779	60976	chr3R	4235057	4235254	ZAM	17	8399	10	197	6-4	67.93	5	1.66667	intergenic	CG14641
1672	chr3R	76338	76554	chr3R	4250616	4250832	ZAM	455	7978	14	216	4-10	75.95	15	0.875	intron	TwdlG
1673	chr3R	120851	121080	chr3R	4295129	4295358	ZAM	7963	453	31	229	23-8	73.46	8	3.44444	exon	cpx
1674	chr3R	176076	176245	chr3R	4350354	4350523	ZAM	3	393	12	169	10-2	68.72	16	0.705882	intergenic	not near genes
1675	chr3R	213007	213196	chr3R	4387285	4387474	ZAM	8006	456	10	189	9-1	74.73	7	1.25	intergenic	Cont
1676	chr3R	240760	240948	chr3R	4415038	4415226	jockey	4982	20	12	188	6-6	62.61	7	1.5	intron	CG32944
1677	chr3R	334638	334788	chr3R	4508916	4509066	ZAM	8338	5	13	150	9-4	73.03	1	6.5	intron	CG34357
1678	chr3R	369788	370002	chr3R	4544066	4544280	ZAM	8401	7961	9	214	3-6	69.33	7	1.125	intron	CG34357
1679	chr3R	383355	383580	chr3R	4557633	4557858	ZAM	5	453	12	225	6-6	68.61	8	1.33333	intron	CG34357
1680	chr3R	390927	391033	chr3R	4565205	4565311	1360	3386	3215	13	106	3-10	77.28	4	2.6	intergenic	not near genes
1681	chr3R	394108	394178	chr3R	4568386	4568456	Doc	85	15	11	70	4-7	65.7	0	11	intergenic	not near genes
1682	chr3R	443584	443785	chr3R	4617862	4618063	297	6969	23	10	201	9-1	63.47	9	1	intron	5-HT2
1683	chr3R	489473	489673	chr3R	4663751	4663951	roo	8676	392	18	200	9-9	66.96	5	3	intron	CG43427
1684	chr3R	539852	540008	chr3R	4714130	4714286	P-element	2849	32	6	156	5-1	51.89	9	0.6	5` UTR	CG9769
1685	chr3R	709812	710018	chr3R	4884090	4884296	Tabor	477	6854	9	206	4-5	68.22	5	1.5	intergenic	not near genes
1686	chr3R	779298	779517	chr3R	4953576	4953795	ZAM	440	7960	20	219	4-16	70.2	11	1.66667	3` UTR	CG14661
1687	chr3R	817600	817696	chr3R	4991878	4991974	mdg3	5259	103	7	96	4-3	71.91	1	3.5	intron	CG2022
1688	chr3R	838954	839159	chr3R	5013232	5013437	ZAM	7965	435	10	205	6-4	70.33	34	0.285714	intergenic	CG2022
1689	chr3R	880741	880943	chr3R	5055019	5055221	ZAM	449	24	14	202	10-4	70.86	5	2.33333	intergenic	not near genes
1690	chr3R	892271	892498	chr3R	5066549	5066776	ZAM	7966	454	46	227	37-9	68.33	7	5.75	intergenic	not near genes
1691	chr3R	979715	979925	chr3R	5153993	5154203	ZAM	7986	457	16	210	11-5	71.33	16	0.941176	5` UTR	dpr16
1692	chr3R	1048978	1049187	chr3R	5223256	5223465	P-element	2876	6	26	209	15-11	48.98	8	2.88889	5` UTR	CG2604
1693	chr3R	1109873	1110085	chr3R	5284151	5284363	roo	8669	396	18	212	6-12	67.07	15	1.125	intron	mtd
1694	chr3R	1145851	1146043	chr3R	5320129	5320321	springer	7506	23	11	192	6-5	73.82	11	0.916667	intron	mtd
1695	chr3R	1147080	1147268	chr3R	5321358	5321546	springer	7521	42	19	188	9-10	66.25	18	1	intron	mtd
1696	chr3R	1147112	1147313	chr3R	5321390	5321591	gypsy6	353	7416	4	201	3-1	73.33	17	0.222222	intron	mtd
1697	chr3R	1149405	1149560	chr3R	5323683	5323838	ZAM	8353	15	9	155	2-7	64.3	11	0.75	5` UTR	mtd
1698	chr3R	1227817	1228033	chr3R	5402095	5402311	ZAM	456	17	13	216	5-8	67.18	17	0.722222	intron	CG2663
1699	chr3R	1252046	1252282	chr3R	5426324	5426560	ZAM	456	7959	28	236	12-16	73.43	29	0.933333	intron	CG14669
1700	chr3R	1266090	1266318	chr3R	5440368	5440596	ZAM	7963	452	10	228	5-5	73.53	10	0.909091	intron	CG14669
1701	chr3R	1490551	1490758	chr3R	5664829	5665036	ZAM	8392	7962	4	207	1-3	76.33	12	0.307692	exon	CG1109
1702	chr3R	1510831	1511039	chr3R	5685109	5685317	ZAM	8395	7962	21	208	8-13	72.95	6	3	intron	Rab23
1703	chr3R	1547798	1547978	chr3R	5722076	5722256	ZAM	29	8394	23	180	14-9	68.17	10	2.09091	intergenic	not near genes
1704	chr3R	1625971	1626156	chr3R	5800249	5800434	mdg3	5282	5484	11	185	6-5	70.73	7	1.375	intergenic	CG10979
1705	chr3R	1637451	1637680	chr3R	5811729	5811958	ZAM	7960	8412	25	229	17-8	70.53	18	1.31579	intergenic	CG11000
1706	chr3R	1708279	1708477	chr3R	5882557	5882755	roo	29	407	12	198	8-4	76.28	2	4	intron	CG34113
1707	chr3R	1775191	1775385	chr3R	5949469	5949663	blood	349	7018	17	194	8-9	68.86	10	1.54545	intergenic	not near genes
1708	chr3R	1794959	1795161	chr3R	5969237	5969439	ZAM	12	437	7	202	3-4	67.91	11	0.583333	intergenic	Obp83a
1709	chr3R	1817030	1817226	chr3R	5991308	5991504	mdg3	5476	5263	8	196	4-4	70.67	6	1.14286	intergenic	not near genes
1710	chr3R	1852604	1852815	chr3R	6026882	6027093	mdg3	226	5250	19	211	6-13	67.02	15	1.1875	exon	CG11459
1711	chr3R	1864527	1864732	chr3R	6038805	6039010	mdg1	7043	7441	9	205	2-7	72	8	1	intergenic	not near genes
1712	chr3R	1896408	1896627	chr3R	6070686	6070905	ZAM	454	12	17	219	7-10	70.24	3	4.25	intergenic	not near genes
1713	chr3R	1945439	1945667	chr3R	6119717	6119945	ZAM	458	7969	9	228	6-3	69.85	11	0.75	intergenic	Vha14-2
1714	chr3R	1972916	1973124	chr3R	6147194	6147402	copia	235	4869	7	208	3-4	73.14	18	0.368421	intergenic	CG31559
1715	chr3R	1973598	1973819	chr3R	6147876	6148097	ZAM	7961	8405	22	221	14-8	70.48	6	3.14286	intergenic	CG31559
1716	chr3R	2025605	2025767	chr3R	6199883	6200045	I-element	5303	10	9	162	4-5	73.41	0	9	intron	Osi24
1717	chr3R	2054571	2054795	chr3R	6228849	6229073	ZAM	7970	455	17	224	9-8	68.2	18	0.894737	intergenic	Osi5
1718	chr3R	2068972	2069182	chr3R	6243250	6243460	roo	400	10	7	210	4-3	73.81	12	0.538462	intergenic	not near genes
1719	chr3R	2071956	2072095	chr3R	6246234	6246373	ZAM	8351	7991	16	139	6-10	66.54	6	2.28571	intergenic	Osi7
1720	chr3R	2149373	2149441	chr3R	6323651	6323719	mdg3	36	5355	4	68	1-3	77	0	4	intron	Osi17
1721	chr3R	2239068	2239272	chr3R	6413346	6413550	FB	20	1	7	204	2-5	71.9	8	0.777778	intron	gpp
1722	chr3R	2256735	2256894	chr3R	6431013	6431172	3S18	272	5766	5	159	1-4	67.86	5	0.833333	intron	gpp
1723	chr3R	2260757	2260954	chr3R	6435035	6435232	ZAM	440	7982	13	197	5-8	67.74	3	3.25	intron	gpp
1724	chr3R	2262497	2262598	chr3R	6436775	6436876	ZAM	99	7960	12	101	5-7	65.67	6	1.71429	5` UTR	gpp
1725	chr3R	2302202	2302430	chr3R	6476480	6476708	ZAM	7960	8411	26	228	18-8	69.46	12	2	intergenic	CG15186
1726	chr3R	2330989	2331168	chr3R	6505267	6505446	springer	7136	332	24	179	11-13	70.03	2	8	intergenic	not near genes
1727	chr3R	2344965	2345057	chr3R	6519243	6519335	mdg3	5262	5354	14	92	4-10	70.57	2	4.66667	intergenic	not near genes
1728	chr3R	2352398	2352593	chr3R	6526676	6526871	pogo	2080	16	10	195	3-7	67.53	17	0.555556	intergenic	CG15185
1729	chr3R	2378929	2379154	chr3R	6553207	6553432	Burdock	4	6390	9	225	7-2	71.26	23	0.375	intron	dpr11
1730	chr3R	2387119	2387329	chr3R	6561397	6561607	ZAM	8402	7969	18	210	6-12	70.71	3	4.5	intron	dpr11
1731	chr3R	2393864	2394076	chr3R	6568142	6568354	ZAM	7962	435	16	212	8-8	69.62	7	2	intron	dpr11
1732	chr3R	2403232	2403453	chr3R	6577510	6577731	ZAM	453	7971	22	221	8-14	66.42	13	1.57143	intron	dpr11
1733	chr3R	2407768	2407979	chr3R	6582046	6582257	copia	252	14	10	211	6-4	72.07	7	1.25	intron	dpr11
1734	chr3R	2408781	2408987	chr3R	6583059	6583265	ZAM	23	452	23	206	10-13	64.49	5	3.83333	intron	dpr11
1735	chr3R	2412213	2412382	chr3R	6586491	6586660	ZAM	450	58	6	169	4-2	73.11	8	0.666667	intron	dpr11
1736	chr3R	2425773	2425995	chr3R	6600051	6600273	ZAM	8412	7967	11	222	5-6	64.36	13	0.785714	intergenic	CG1138
1737	chr3R	2459111	2459348	chr3R	6633389	6633626	ZAM	459	7961	39	237	15-24	71.54	13	2.78571	intergenic	sunz
1738	chr3R	2463882	2464075	chr3R	6638160	6638353	ZAM	8409	7993	18	193	7-11	71.67	21	0.818182	intergenic	not near genes
1739	chr3R	2597261	2597483	chr3R	6771539	6771761	ZAM	442	7960	28	222	7-21	69.98	8	3.11111	intron	CR42721
1740	chr3R	2612148	2612338	chr3R	6786426	6786616	mdg3	5276	231	16	190	12-4	63.33	5	2.66667	intergenic	not near genes
1741	chr3R	2634354	2634498	chr3R	6808632	6808776	mdg3	83	5496	12	144	4-8	71.22	3	3	intergenic	CR42651
1742	chr3R	2685098	2685256	chr3R	6859376	6859534	ZAM	8342	1	14	158	6-8	70.67	12	1.07692	intergenic	not near genes
1743	chr3R	2776681	2776844	chr3R	6950959	6951122	ZAM	2	386	14	163	9-5	71.38	6	2	intron	Antp
1744	chr3R	2938501	2938661	chr3R	7112779	7112939	ZAM	413	7993	8	160	3-5	63.09	7	1	intron	Alh
1745	chr3R	2967549	2967769	chr3R	7141827	7142047	diver	5899	227	10	220	3-7	74.67	13	0.714286	3` UTR	Fer1
1746	chr3R	3124153	3124351	chr3R	7298431	7298629	ZAM	450	29	18	198	12-6	67.93	5	3	intron	rn
1747	chr3R	3189878	3190078	chr3R	7364156	7364356	springer	14	368	24	200	13-11	67.06	12	1.84615	intergenic	CG17944
1748	chr3R	3236078	3236198	chr3R	7410356	7410476	Stalker2	376	82	6	120	4-2	67.44	3	1.5	intergenic	Ir84a
1749	chr3R	3300749	3300862	chr3R	7475027	7475140	springer	24	7427	5	113	2-3	70.67	5	0.833333	intergenic	CG1142
1750	chr3R	3307163	3307390	chr3R	7481441	7481668	opus	493	7114	14	227	10-4	73	11	1.16667	intergenic	not near genes
1751	chr3R	3356128	3356326	chr3R	7530406	7530604	Juan	63	4166	10	198	7-3	63.67	13	0.714286	intergenic	alpha-Est6
1752	chr3R	3375135	3375348	chr3R	7549413	7549626	ZAM	436	7962	12	213	5-7	71.39	10	1.09091	intergenic	alpha-Est1
1753	chr3R	3449811	3450025	chr3R	7624089	7624303	Transpac	17	311	15	214	7-8	67.47	11	1.25	intron	CG34127
1754	chr3R	3475559	3475661	chr3R	7649837	7649939	Quasimodo	104	2	4	102	3-1	72	1	2	intergenic	not near genes
1755	chr3R	3509641	3509820	chr3R	7683919	7684098	copia	9	5084	11	179	7-4	65.03	11	0.916667	intron	Nlg1
1756	chr3R	3541333	3541559	chr3R	7715611	7715837	roo	8665	407	27	226	14-13	73.53	8	3	intergenic	not near genes
1757	chr3R	3544230	3544333	chr3R	7718508	7718611	ZAM	457	8314	8	103	4-4	76.67	10	0.727273	intergenic	not near genes
1758	chr3R	3586717	3586926	chr3R	7760995	7761204	ZAM	442	7971	12	209	7-5	73.39	3	3	5` UTR	Sp7
1759	chr3R	3694532	3694672	chr3R	7868810	7868950	3S18	6071	5819	4	140	1-3	62.67	0	4	intron	CG17816
1760	chr3R	3700466	3700628	chr3R	7874744	7874906	jockey	4668	4949	9	162	6-3	70.52	9	0.9	intron	CG17816
1761	chr3R	3717866	3718064	chr3R	7892144	7892342	springer	359	7	19	198	11-8	60.56	9	1.9	intron	mRpS9
1762	chr3R	3768250	3768440	chr3R	7942528	7942718	springer	7499	18	23	190	9-14	67.19	5	3.83333	intron	dsx
1763	chr3R	3813955	3814185	chr3R	7988233	7988463	ZAM	454	1	33	230	6-27	71.66	22	1.43478	intron	CG2781
1764	chr3R	3814379	3814517	chr3R	7988657	7988795	springer	7520	90	6	138	3-3	80.34	3	1.5	intron	CG2781
1765	chr3R	3817240	3817458	chr3R	7991518	7991736	ZAM	7970	8411	21	218	13-8	71.27	19	1.05	intron	CG2781
1766	chr3R	3843396	3843576	chr3R	8017674	8017854	mdg1	2	375	7	180	2-5	71.14	5	1.16667	intron	CG2747
1767	chr3R	3896608	3896806	chr3R	8070886	8071084	297	338	4	14	198	4-10	67.33	3	3.5	intron	CG7918
1768	chr3R	3932768	3932957	chr3R	8107046	8107235	roo	413	44	14	189	7-7	69.38	7	1.75	intron	puc
1769	chr3R	3944673	3944893	chr3R	8118951	8119171	springer	7144	381	26	220	14-12	70.41	8	2.88889	intron	puc
1770	chr3R	3987042	3987239	chr3R	8161320	8161517	ZAM	29	449	21	197	13-8	66.76	4	4.2	intron	grn
1771	chr3R	3998300	3998526	chr3R	8172578	8172804	ZAM	7960	8408	9	226	3-6	72.67	8	1	intron	grn
1772	chr3R	4132497	4132690	chr3R	8306775	8306968	jockey	4704	4971	9	193	6-3	65.41	22	0.391304	intergenic	Gfr
1773	chr3R	4257797	4257903	chr3R	8432075	8432181	ZAM	8069	1	12	106	4-8	70.5	2	4	intron	CG43462
1774	chr3R	4406837	4407058	chr3R	8581115	8581336	ZAM	454	10	23	221	13-10	71.68	15	1.4375	intron	CG42796
1775	chr3R	4422382	4422596	chr3R	8596660	8596874	ZAM	7977	452	15	214	11-4	67.07	4	3	intron	CG42796
1776	chr3R	4484448	4484665	chr3R	8658726	8658943	S-element	1706	5	4	217	2-2	78.16	6	0.571429	intron	bel
1777	chr3R	4507761	4507982	chr3R	8682039	8682260	ZAM	443	7960	17	221	6-11	72.43	0	17	intergenic	CG33325
1778	chr3R	4592411	4592605	chr3R	8766689	8766883	mdg3	229	18	11	194	8-3	65.33	8	1.22222	intron	CG11768
1779	chr3R	4666627	4666794	chr3R	8840905	8841072	opus	170	7495	14	167	3-11	66.14	2	4.66667	intron	pyd
1780	chr3R	4686609	4686721	chr3R	8860887	8860999	297	337	62	5	112	3-2	73.07	0	5	intron	pyd
1781	chr3R	4698810	4699001	chr3R	8873088	8873279	Juan	5	4185	9	191	5-4	73.11	4	1.8	intron	pyd
1782	chr3R	4743837	4744014	chr3R	8918115	8918292	FB	2	46	4	177	3-1	72.34	10	0.363636	intron	pyd
1783	chr3R	4761750	4761957	chr3R	8936028	8936235	mdg3	242	5270	13	207	7-6	68.72	21	0.590909	exon	osk
1784	chr3R	4775238	4775446	chr3R	8949516	8949724	roo	395	7	18	208	8-10	71.93	11	1.5	intergenic	CG11966
1785	chr3R	4804203	4804438	chr3R	8978481	8978716	ZAM	7958	454	16	235	8-8	71.38	9	1.6	intergenic	CAHbeta
1786	chr3R	4835623	4835815	chr3R	9009901	9010093	mdg3	5265	5474	15	192	11-4	70.22	2	5	exon	CG11983
1787	chr3R	4850482	4850694	chr3R	9024760	9024972	pogo	4	2085	9	212	3-6	65.93	9	0.9	intron	neur
1788	chr3R	4987288	4987452	chr3R	9161566	9161730	pogo	4	2039	13	164	8-5	70	2	4.33333	intron	pum
1789	chr3R	5175262	5175480	chr3R	9349540	9349758	mdg3	246	5257	16	218	10-6	68.83	6	2.28571	intron	CG43674
1790	chr3R	5274786	5274969	chr3R	9449064	9449247	ZAM	456	50	8	183	3-5	65.58	3	2	intergenic	ps
1791	chr3R	5307309	5307433	chr3R	9481587	9481711	ZAM	354	9	8	124	4-4	69.5	4	1.6	intron	CG16779
1792	chr3R	5369862	5370013	chr3R	9544140	9544291	copia	4907	216	8	151	5-3	59.5	0	8	intron	mura
1793	chr3R	5392148	5392373	chr3R	9566426	9566651	mdg3	249	5259	24	225	10-14	70.03	30	0.774194	exon	CG16789
1794	chr3R	5486038	5486254	chr3R	9660316	9660532	ZAM	17	456	9	216	5-4	75.33	27	0.321429	exon	CG9492
1795	chr3R	5528705	5528898	chr3R	9702983	9703176	copia	4883	232	5	193	4-1	68.8	5	0.833333	intron	Unc-115a
1796	chr3R	5594665	5594874	chr3R	9768943	9769152	ZAM	430	7960	19	209	5-14	66.11	12	1.46154	exon	CG8481
1797	chr3R	5609146	5609308	chr3R	9783424	9783586	ZAM	8351	6	10	162	3-7	68.4	4	2	3` UTR	MtnA
1798	chr3R	5611526	5611758	chr3R	9785804	9786036	ZAM	457	2	23	232	6-17	70.46	22	1	5` UTR	CG8500
1799	chr3R	5649447	5649653	chr3R	9823725	9823931	roo	8664	386	13	206	8-5	71.9	1	6.5	5` UTR	CG34302
1800	chr3R	5683977	5684192	chr3R	9858255	9858470	mdg3	5250	5482	16	215	10-6	69.04	2	5.33333	intron	Teh1
1801	chr3R	5709854	5710065	chr3R	9884132	9884343	mdg3	5266	242	18	211	9-9	74	5	3	intron	Glut4EF
1802	chr3R	5755253	5755449	chr3R	9929531	9929727	springer	13	7500	11	196	2-9	67.03	8	1.22222	intron	Glut4EF
1803	chr3R	5774776	5774997	chr3R	9949054	9949275	ZAM	444	7962	26	221	4-22	69.41	7	3.25	intron	Glut4EF
1804	chr3R	5796834	5797031	chr3R	9971112	9971309	ZAM	7976	7983	30	197	17-13	63.04	5	5	intron	Glut4EF
1805	chr3R	5865514	5865711	chr3R	10039792	10039989	412	29	490	19	197	10-9	67.23	6	2.71429	intron	Mical
1806	chr3R	5897060	5897262	chr3R	10071338	10071540	ZAM	29	454	16	202	10-6	68.96	27	0.571429	exon	nerfin-2
1807	chr3R	5941958	5942094	chr3R	10116236	10116372	I-element	109	5270	7	136	1-6	68.38	3	1.75	intron	CG3940
1808	chr3R	5976197	5976408	chr3R	10150475	10150686	ZAM	453	19	19	211	7-12	67.19	0	19	intron	Invadolysin
1809	chr3R	6012058	6012269	chr3R	10186336	10186547	mdg3	236	5260	23	211	11-12	71.71	7	2.875	intron	CG12814
1810	chr3R	6014834	6015030	chr3R	10189112	10189308	412	2	7515	15	196	10-5	70.36	4	3	intron	CG12814
1811	chr3R	6243609	6243819	chr3R	10417887	10418097	ZAM	454	21	20	210	7-13	71.87	5	3.33333	intergenic	CG6345
1812	chr3R	6246251	6246462	chr3R	10420529	10420740	ZAM	433	7982	12	211	3-9	62.45	6	1.71429	intergenic	not near genes
1813	chr3R	6248229	6248411	chr3R	10422507	10422689	ZAM	411	7969	21	182	9-12	68.35	4	4.2	intergenic	not near genes
1814	chr3R	6258742	6258874	chr3R	10433020	10433152	copia	4880	5039	5	132	3-2	70.4	0	5	intergenic	Cyp12e1
1815	chr3R	6297582	6297677	chr3R	10471860	10471955	F-element	18	113	7	95	5-2	70.19	0	7	intergenic	not near genes
1816	chr3R	6305195	6305397	chr3R	10479473	10479675	ZAM	7989	8414	17	202	12-5	66.47	3	4.25	intergenic	not near genes
1817	chr3R	6309815	6310014	chr3R	10484093	10484292	ZAM	7997	457	12	199	6-6	69.83	5	2	intergenic	not near genes
1818	chr3R	6458358	6458529	chr3R	10632636	10632807	mdg3	5446	5259	11	171	4-7	64.3	3	2.75	intergenic	not near genes
1819	chr3R	6466272	6466495	chr3R	10640550	10640773	ZAM	7969	454	23	223	14-9	70.61	9	2.3	5` UTR	CR44018
1820	chr3R	6544690	6544803	chr3R	10718968	10719081	jockey	4523	4982	13	113	6-7	66.36	1	6.5	intergenic	not near genes
1821	chr3R	6601681	6601914	chr3R	10775959	10776192	ZAM	7964	458	35	233	23-12	71.92	3	8.75	intron	fau
1822	chr3R	6629729	6629909	chr3R	10804007	10804187	297	6590	6932	8	180	6-2	67	2	2.66667	intergenic	CG14692
1823	chr3R	6655235	6655459	chr3R	10829513	10829737	ZAM	7967	452	28	224	23-5	69.43	15	1.75	intron	Cad86C
1824	chr3R	6739131	6739295	chr3R	10913409	10913573	412	436	8	13	164	3-10	61.64	5	2.16667	intergenic	not near genes
1825	chr3R	6777843	6778076	chr3R	10952121	10952354	ZAM	456	7962	14	233	7-7	69.33	24	0.56	intergenic	Tengl4
1826	chr3R	7028605	7028819	chr3R	11202883	11203097	ZAM	7970	8407	27	214	15-12	73.53	9	2.7	intron	cu
1827	chr3R	7089480	7089692	chr3R	11263758	11263970	ZAM	455	20	6	212	3-3	66.45	2	2	intergenic	not near genes
1828	chr3R	7132105	7132269	chr3R	11306383	11306547	pogo	2071	38	6	164	3-3	58.67	5	1	intergenic	CR31386
1829	chr3R	7166431	7166571	chr3R	11340709	11340849	jockey	4927	23	9	140	4-5	68.45	2	3	intron	pros
1830	chr3R	7178754	7178907	chr3R	11353032	11353185	ZAM	17	391	12	153	6-6	69.06	11	1	intron	pros
1831	chr3R	7242691	7242910	chr3R	11416969	11417188	blood	7015	371	27	219	14-13	68.49	11	2.25	exon	CG6723
1832	chr3R	7283028	7283160	chr3R	11457306	11457438	17.6	6996	463	8	132	2-6	69.08	10	0.727273	intron	CG17230
1833	chr3R	7307497	7307574	chr3R	11481775	11481852	jockey	4969	4892	6	77	4-2	68.44	0	6	intergenic	not near genes
1834	chr3R	7309354	7309591	chr3R	11483632	11483869	ZAM	8407	456	31	237	14-17	72.71	5	5.16667	intergenic	not near genes
1835	chr3R	7388685	7388758	chr3R	11562963	11563036	jockey	13	87	7	73	1-6	61.52	0	7	intron	fabp
1836	chr3R	7532001	7532566	chr3R	11706279	11706844	ZAM	7	443	31	565	14-17	68.75	25	1.19231	intergenic	I-t
1837	chr3R	7542319	7542519	chr3R	11716597	11716797	ZAM	432	7962	24	200	10-14	67.36	4	4.8	intergenic	not near genes
1838	chr3R	7542930	7543125	chr3R	11717208	11717403	flea	221	4757	26	195	4-22	69.74	7	3.25	intergenic	not near genes
1839	chr3R	7585752	7585927	chr3R	11760030	11760205	ZAM	394	7960	35	175	16-19	69.09	5	5.83333	intron	Lk6
1840	chr3R	7588095	7588286	chr3R	11762373	11762564	springer	7157	368	19	191	7-12	69.97	13	1.35714	intron	Lk6
1841	chr3R	7613251	7613461	chr3R	11787529	11787739	ZAM	7970	8403	21	210	16-5	70.73	19	1.05	5` UTR	HisCl1
1842	chr3R	7653701	7653828	chr3R	11827979	11828106	Transpac	5135	9	8	127	5-3	75.92	0	8	intron	CG6959
1843	chr3R	7737925	7738106	chr3R	11912203	11912384	micropia	5409	4972	5	181	2-3	72.27	9	0.5	intron	Cad87A
1844	chr3R	7741485	7741698	chr3R	11915763	11915976	ZAM	11	453	17	213	10-7	67.26	0	17	intron	Cad87A
1845	chr3R	7745482	7745695	chr3R	11919760	11919973	ZAM	457	21	23	213	12-11	69.68	1	11.5	intron	Cad87A
1846	chr3R	7769935	7770114	chr3R	11944213	11944392	ZAM	8399	34	10	179	6-4	67.07	18	0.526316	intron	Cad87A
1847	chr3R	7816401	7816528	chr3R	11990679	11990806	springer	7450	7169	6	127	4-2	74.78	0	6	intron	mfas
1848	chr3R	7856636	7856851	chr3R	12030914	12031129	ZAM	9	8410	16	215	11-5	69.71	15	1	exon	CG31358
1849	chr3R	7878643	7878837	chr3R	12052921	12053115	17.6	484	6955	12	194	5-7	68.44	2	4	intergenic	not near genes
1850	chr3R	7905546	7905780	chr3R	12079824	12080058	ZAM	7963	458	35	234	26-9	69.47	3	8.75	intron	CG14741
1851	chr3R	7920252	7920475	chr3R	12094530	12094753	ZAM	7978	462	15	223	8-7	66.62	12	1.15385	intergenic	dpr17
1852	chr3R	7974749	7974971	chr3R	12149027	12149249	mdg3	5496	5261	17	222	8-9	68.43	3	4.25	intron	dpr15
1853	chr3R	8046153	8046378	chr3R	12220431	12220656	ZAM	449	7963	32	225	10-22	68.88	19	1.6	exon	CG4860
1854	chr3R	8189537	8189617	chr3R	12363815	12363895	jockey	102	21	5	80	4-1	70	0	5	3` UTR	Tim17a1
1855	chr3R	8197396	8197580	chr3R	12371674	12371858	springer	22	7498	19	184	14-5	65.58	11	1.58333	intergenic	GstD1
1856	chr3R	8206828	8207037	chr3R	12381106	12381315	ZAM	7964	8396	27	209	19-8	66.91	9	2.7	intergenic	GstD7
1857	chr3R	8337009	8337213	chr3R	12511287	12511491	Stalker2	11	7637	19	204	13-6	72.07	6	2.71429	3` UTR	Hsp70Bc
1858	chr3R	8360099	8360297	chr3R	12534377	12534575	roo	9060	8683	8	198	3-5	67.09	13	0.571429	intron	Octbeta3R
1859	chr3R	8376994	8377215	chr3R	12551272	12551493	mdg3	5494	5256	13	221	4-9	72.72	10	1.18182	intergenic	mir-284
1860	chr3R	8467473	8467673	chr3R	12641751	12641951	ZAM	7975	8398	14	200	8-6	64.52	14	0.933333	intron	CG6753
1861	chr3R	8559203	8559417	chr3R	12733481	12733695	ZAM	7963	413	20	214	11-9	64.43	0	20	intergenic	not near genes
1862	chr3R	8649963	8650188	chr3R	12824241	12824466	ZAM	1	8411	17	225	10-7	69.26	0	17	intergenic	not near genes
1863	chr3R	8699946	8700118	chr3R	12874224	12874396	ZAM	8011	444	17	172	9-8	71.92	7	2.125	intergenic	not near genes
1864	chr3R	8841847	8842057	chr3R	13016125	13016335	ZAM	457	7986	15	210	8-7	70.62	7	1.875	intron	CtBP
1865	chr3R	8873724	8873957	chr3R	13048002	13048235	ZAM	7955	8411	21	233	11-10	71.37	4	4.2	intron	CG31157
1866	chr3R	8888206	8888498	chr3R	13062484	13062776	ZAM	7962	8204	28	292	25-3	72.09	11	2.33333	intergenic	sim
1867	chr3R	8940813	8940909	chr3R	13115091	13115187	F-element	10	105	10	96	5-5	62.87	2	3.33333	intron	timeout
1868	chr3R	8956492	8956722	chr3R	13130770	13131000	ZAM	3	456	13	230	8-5	72.92	16	0.764706	intron	timeout
1869	chr3R	9043893	9044104	chr3R	13218171	13218382	ZAM	8398	2	14	211	6-8	69.67	17	0.777778	intergenic	CG8476
1870	chr3R	9285126	9285398	chr3R	13459404	13459676	mdg3	25	193	13	272	8-5	71.85	11	1.08333	intron	CG14372
1871	chr3R	9306339	9306430	chr3R	13480617	13480708	flea	4859	11	24	91	16-8	71	0	24	intergenic	not near genes
1872	chr3R	9320494	9320662	chr3R	13494772	13494940	ZAM	3	8354	14	168	8-6	71.52	0	14	intergenic	not near genes
1873	chr3R	9324612	9324775	chr3R	13498890	13499053	ZAM	2	386	11	163	5-6	73.45	0	11	intergenic	not near genes
1874	chr3R	9348764	9348975	chr3R	13523042	13523253	ZAM	1	454	18	211	15-3	69.78	4	3.6	exon	CG12538
1875	chr3R	9428057	9428266	chr3R	13602335	13602544	mdg1	19	7458	18	209	10-8	64.3	1	9	intergenic	not near genes
1876	chr3R	9568421	9568604	chr3R	13742699	13742882	Juan	4177	2	13	183	7-6	72	2	4.33333	intron	CG34383
1877	chr3R	9603237	9603459	chr3R	13777515	13777737	ZAM	8407	7962	19	222	8-11	73.72	8	2.11111	exon	CG9297
1878	chr3R	9652106	9652396	chr3R	13826384	13826674	ZAM	436	7979	50	290	25-25	68.99	4	10	intergenic	Mst87F
1879	chr3R	9677179	9677361	chr3R	13851457	13851639	ZAM	8399	32	12	182	3-9	66.67	0	12	intergenic	not near genes
1880	chr3R	9689834	9690111	chr3R	13864112	13864389	I-element	37	5302	12	277	9-3	69.56	18	0.631579	intergenic	not near genes
1881	chr3R	9801339	9801556	chr3R	13975617	13975834	pogo	7	2093	11	217	5-6	67.64	0	11	intron	rdx
1882	chr3R	9833634	9833800	chr3R	14007912	14008078	FB	4	55	4	166	3-1	68	3	1	intron	rdx
1883	chr3R	9863762	9863937	chr3R	14038040	14038215	Juan	4203	4046	4	175	3-1	70.83	5	0.666667	intergenic	CG3061
1884	chr3R	9874996	9875203	chr3R	14049274	14049481	transib2	7	2809	9	207	5-4	71.48	0	9	intergenic	not near genes
1885	chr3R	9919475	9919701	chr3R	14093753	14093979	mdg3	5496	5253	18	226	5-13	66.89	1	9	intron	CCHa1
1886	chr3R	10124330	10124396	chr3R	14298608	14298674	jockey	332	398	8	66	6-2	58.42	0	8	intron	CG12207
1887	chr3R	10133755	10133910	chr3R	14308033	14308188	jockey	4687	4949	10	155	6-4	60.87	8	1.11111	intron	su(Hw)
1888	chr3R	10177100	10177306	chr3R	14351378	14351584	gypsy6	7417	359	4	206	2-2	77.17	0	4	intron	NK7.1
1889	chr3R	10177110	10177311	chr3R	14351388	14351589	springer	8	363	25	201	17-8	69.97	0	25	intron	NK7.1
1890	chr3R	10190866	10191081	chr3R	14365144	14365359	springer	7515	7146	17	215	7-10	70.94	12	1.30769	intron	NK7.1
1891	chr3R	10251295	10251519	chr3R	14425573	14425797	ZAM	1	448	20	224	15-5	62.83	3	5	intron	cv-c
1892	chr3R	10267595	10267757	chr3R	14441873	14442035	springer	7483	30	17	162	8-9	68.86	8	1.88889	intron	cv-c
1893	chr3R	10273662	10273842	chr3R	14447940	14448120	roo	405	8709	14	180	9-5	71.76	0	14	intron	cv-c
1894	chr3R	10344582	10344675	chr3R	14518860	14518953	ZAM	15	108	13	93	9-4	70.67	2	4.33333	intron	Pde6
1895	chr3R	10358686	10358898	chr3R	14532964	14533176	mdg1	7451	9	18	212	10-8	70.85	9	1.8	intron	Pde6
1896	chr3R	10371432	10371667	chr3R	14545710	14545945	ZAM	457	7961	27	235	8-19	71.73	4	5.4	intron	Pde6
1897	chr3R	10384387	10384449	chr3R	14558665	14558727	Juan	50	8	5	62	2-3	69.2	0	5	intergenic	Pde6
1898	chr3R	10450720	10450929	chr3R	14624998	14625207	springer	7520	7153	19	209	5-14	67.93	2	6.33333	intron	put
1899	chr3R	10478694	10478908	chr3R	14652972	14653186	Juan	4211	6	8	214	3-5	70.83	9	0.8	intron	l(3)L1231
1900	chr3R	10487059	10487285	chr3R	14661337	14661563	ZAM	447	7960	37	226	12-25	68.63	15	2.3125	3` UTR	Rad17
1901	chr3R	10548830	10548982	chr3R	14723108	14723260	springer	7201	7505	7	152	1-6	58.76	0	7	intron	kibra
1902	chr3R	10639873	10640099	chr3R	14814151	14814377	ZAM	7965	8414	33	226	24-9	69.45	21	1.5	intron	btsz
1903	chr3R	10668752	10668927	chr3R	14843030	14843205	mdg3	5258	5450	20	175	14-6	66.97	5	3.33333	intron	btsz
1904	chr3R	10688896	10689115	chr3R	14863174	14863393	HMS-Beagle	7032	1	34	219	13-21	68.76	18	1.78947	intron	btsz
1905	chr3R	10707732	10707825	chr3R	14882010	14882103	gypsy5	409	7255	12	93	8-4	62.33	5	2	exon	CG3631
1906	chr3R	10737645	10737749	chr3R	14911923	14912027	mdg3	5251	103	16	104	5-11	72.29	2	5.33333	intergenic	not near genes
1907	chr3R	10876911	10877095	chr3R	15051189	15051373	mdg3	25	5478	14	184	6-8	75.05	0	14	intergenic	not near genes
1908	chr3R	11107124	11107303	chr3R	15281402	15281581	ZAM	451	8011	15	179	8-7	67.69	16	0.882353	intergenic	l(3)neo43
1909	chr3R	11309837	11310058	chr3R	15484115	15484336	ZAM	442	7960	29	221	10-19	70.57	1	14.5	exon	Rh6
1910	chr3R	11360920	11361149	chr3R	15535198	15535427	ZAM	7961	8413	25	229	17-8	70.69	10	2.27273	intron	CG18522
1911	chr3R	11458555	11458767	chr3R	15632833	15633045	ZAM	7969	8404	22	212	12-10	65.88	0	22	intergenic	CG43335
1912	chr3R	11487125	11487342	chr3R	15661403	15661620	mdg3	5250	5484	25	217	16-9	65.63	2	8.33333	intergenic	not near genes
1913	chr3R	11500710	11500770	chr3R	15674988	15675048	mdg3	98	38	7	60	4-3	52.1	0	7	intron	pxb
1914	chr3R	11504568	11504706	chr3R	15678846	15678984	ZAM	387	7990	10	138	3-7	65.67	2	3.33333	intron	pxb
1915	chr3R	11522680	11522886	chr3R	15696958	15697164	3S18	5765	6082	12	206	5-7	69.61	1	6	intergenic	CG31446
1916	chr3R	11549905	11550119	chr3R	15724183	15724397	opus	490	8	12	214	9-3	70.78	2	4	intergenic	not near genes
1917	chr3R	11598856	11599068	chr3R	15773134	15773346	Idefix	18	7390	4	212	3-1	72.83	0	4	intergenic	CG4525
1918	chr3R	11721695	11721845	chr3R	15895973	15896123	ZAM	8333	7962	13	150	3-10	72.51	4	2.6	intergenic	glob1
1919	chr3R	11747873	11748082	chr3R	15922151	15922360	ZAM	7967	8399	17	209	12-5	68.35	19	0.85	intron	CG4221
1920	chr3R	11763915	11764048	chr3R	15938193	15938326	copia	196	4903	11	133	3-8	64.18	7	1.375	intron	Sap47
1921	chr3R	11763976	11764070	chr3R	15938254	15938348	jockey	15	110	9	94	5-4	65.7	1	4.5	intron	Sap47
1922	chr3R	11786370	11786547	chr3R	15960648	15960825	ZAM	7976	413	6	177	4-2	65.89	4	1.2	3` UTR	Sap47
1923	chr3R	11810380	11810599	chr3R	15984658	15984877	ZAM	2	8406	15	219	11-4	67.87	11	1.25	intergenic	Hel89B
1924	chr3R	11838468	11838679	chr3R	16012746	16012957	mdg3	5260	5488	12	211	10-2	70.22	0	12	exon	GATAe
1925	chr3R	11902409	11902616	chr3R	16076687	16076894	mdg3	5476	5251	17	207	4-13	68.78	7	2.125	intron	Mhcl
1926	chr3R	11933784	11933866	chr3R	16108062	16108144	Juan	4117	4199	7	82	5-2	67.81	0	7	intergenic	not near genes
1927	chr3R	12061558	12061749	chr3R	16235836	16236027	springer	7150	358	20	191	15-5	70.03	5	3.33333	intron	tara
1928	chr3R	12112159	12112246	chr3R	16286437	16286524	FB	71	66	8	87	5-3	73.17	0	8	intron	gish
1929	chr3R	12182585	12182799	chr3R	16356863	16357077	ZAM	8397	7960	21	214	9-12	70	11	1.75	5` UTR	CG10311
1930	chr3R	12193802	12194014	chr3R	16368080	16368292	ZAM	454	19	14	212	8-6	70.62	0	14	5` UTR	CG14880
1931	chr3R	12244687	12244832	chr3R	16418965	16419110	I-element	7	5287	13	145	6-7	68.67	0	13	intergenic	not near genes
1932	chr3R	12321050	12321210	chr3R	16495328	16495488	ZAM	7961	380	20	160	13-7	70.63	4	4	exon	Cad89D
1933	chr3R	12338246	12338463	chr3R	16512524	16512741	copia	4877	259	16	217	10-6	75.21	4	3.2	intron	CG42342
1934	chr3R	12342483	12342706	chr3R	16516761	16516984	ZAM	7965	8411	17	223	11-6	73.45	12	1.30769	intron	CG42342
1935	chr3R	12420122	12420348	chr3R	16594400	16594626	ZAM	7964	8413	12	226	8-4	72.95	14	0.8	intergenic	CG14892
1936	chr3R	12553176	12553388	chr3R	16727454	16727666	mdg3	5259	236	11	212	8-3	69.58	10	1	intron	Ubx
1937	chr3R	12639847	12640072	chr3R	16814125	16814350	mdg3	5257	5498	8	225	6-2	72.34	13	0.571429	intron	abd-A
1938	chr3R	12652167	12652385	chr3R	16826445	16826663	ZAM	8414	7973	17	218	10-7	67.14	12	1.30769	intron	abd-A
1939	chr3R	12833340	12833548	chr3R	17007618	17007826	ZAM	7963	8394	22	208	17-5	69.88	8	2.44444	intergenic	Irc
1940	chr3R	12842803	12842983	chr3R	17017081	17017261	1360	3368	3242	9	180	2-7	64.44	19	0.45	intron	Pxd
1941	chr3R	12843808	12844036	chr3R	17018086	17018314	ZAM	8409	7958	15	228	2-13	74.53	6	2.14286	intron	Pxd
1942	chr3R	12856883	12857081	chr3R	17031161	17031359	ZAM	7991	450	8	198	7-1	68.75	14	0.533333	intergenic	CG5225
1943	chr3R	12924000	12924147	chr3R	17098278	17098425	ZAM	8342	7974	13	147	7-6	73.18	5	2.16667	intron	cher
1944	chr3R	12948253	12948487	chr3R	17122531	17122765	ZAM	7962	457	40	234	20-20	70.25	5	6.66667	intron	cher
1945	chr3R	12966951	12967157	chr3R	17141229	17141435	ZAM	24	8406	7	206	3-4	76.86	24	0.28	3` UTR	TwdlW
1946	chr3R	12973297	12973507	chr3R	17147575	17147785	ZAM	437	4	13	210	5-8	70.2	16	0.764706	exon	m-cup
1947	chr3R	13068771	13068998	chr3R	17243049	17243276	hopper	2	1	28	227	12-16	64.02	0	28	intron	beat-IIb
1948	chr3R	13112372	13112564	chr3R	17286650	17286842	roo	9040	5	22	192	8-14	66.39	0	22	3` UTR	CR43489
1949	chr3R	13244030	13244201	chr3R	17418308	17418479	roo	28	379	7	171	6-1	65.24	3	1.75	intergenic	CG5866
1950	chr3R	13246911	13247070	chr3R	17421189	17421348	pogo	35	2082	5	159	1-4	55.6	0	5	intergenic	CG42834
1951	chr3R	13270376	13270598	chr3R	17444654	17444876	ZAM	7970	455	20	222	11-9	69.4	32	0.606061	exon	CG5873
1952	chr3R	13272637	13272895	chr3R	17446915	17447173	mdg3	218	20	5	258	3-2	64.53	14	0.333333	exon	Eh
1953	chr3R	13311911	13312135	chr3R	17486189	17486413	ZAM	8	455	9	224	4-5	71.26	7	1.125	intron	Dscam3
1954	chr3R	13320349	13320556	chr3R	17494627	17494834	copia	4889	254	7	207	4-3	68.95	9	0.7	intron	Dscam3
1955	chr3R	13374503	13374732	chr3R	17548781	17549010	mdg3	248	5254	16	229	2-14	71.46	0	16	intergenic	Prx3
1956	chr3R	13527844	13528053	chr3R	17702122	17702331	ZAM	7962	8394	21	209	13-8	69.36	2	7	intron	osa
1957	chr3R	13531681	13531867	chr3R	17705959	17706145	springer	24	364	13	186	10-3	71.64	21	0.590909	intron	osa
1958	chr3R	13558909	13559142	chr3R	17733187	17733420	INE-1	559	543	7	233	1-6	75.81	0	7	3` UTR	Lgr1
1959	chr3R	13724913	13725050	chr3R	17899191	17899328	mdg3	30	184	7	137	4-3	68.29	2	2.33333	intron	Rim
1960	chr3R	13759308	13759395	chr3R	17933586	17933673	jockey	94	6	6	87	2-4	68.45	0	6	intergenic	not near genes
1961	chr3R	13952967	13953202	chr3R	18127245	18127480	ZAM	449	7962	18	235	5-13	65.7	22	0.782609	exon	sr
1962	chr3R	14118418	14118631	chr3R	18292696	18292909	ZAM	7	8405	8	213	3-5	66.5	7	1	intergenic	l(3)05822
1963	chr3R	14139016	14139116	chr3R	18313294	18313394	ZAM	8398	107	4	100	1-3	77.83	3	1	intergenic	PKD
1964	chr3R	14156571	14156755	chr3R	18330849	18331033	Juan	10	4195	9	184	5-4	69.04	7	1.125	intergenic	CG31235
1965	chr3R	14164999	14165215	chr3R	18339277	18339493	ZAM	16	455	21	216	16-5	67.84	1	10.5	intron	CG15803
1966	chr3R	14201957	14202071	chr3R	18376235	18376349	ZAM	16	8313	14	114	9-5	70.57	5	2.33333	intergenic	CG7675
1967	chr3R	14219527	14219595	chr3R	18393805	18393873	ZAM	8047	17	9	68	4-5	65.48	0	9	intron	Vha100-2
1968	chr3R	14269021	14269260	chr3R	18443299	18443538	ZAM	457	458	51	239	26-25	70.01	1	25.5	intron	fru
1969	chr3R	14284793	14284941	chr3R	18459071	18459219	copia	228	4923	4	148	1-3	65.67	0	4	intron	fru
1970	chr3R	14302098	14302317	chr3R	18476376	18476595	roo	398	8664	19	219	8-11	66.81	5	3.16667	intron	fru
1971	chr3R	14367088	14367322	chr3R	18541366	18541600	ZAM	7958	453	13	234	9-4	75.08	9	1.3	intron	fru
1972	chr3R	14392660	14392883	chr3R	18566938	18567161	ZAM	7962	446	31	223	19-12	69.46	0	31	intergenic	CG43194
1973	chr3R	14444711	14444921	chr3R	18618989	18619199	roo	9055	3	22	210	5-17	70.24	0	22	intron	qin
1974	chr3R	14447097	14447239	chr3R	18621375	18621517	ZAM	457	92	11	142	6-5	78.67	5	1.83333	intron	qin
1975	chr3R	14448856	14449073	chr3R	18623134	18623351	ZAM	441	7963	19	217	2-17	70.81	4	3.8	intron	qin
1976	chr3R	14531443	14531654	chr3R	18705721	18705932	ZAM	8401	7967	21	211	7-14	70.06	18	1.10526	5` UTR	VAChT
1977	chr3R	14551115	14551478	chr3R	18725393	18725756	ZAM	70	449	20	363	3-17	72.1	47	0.416667	intron	Cha
1978	chr3R	14556732	14556834	chr3R	18731010	18731112	ZAM	8327	8003	5	102	2-3	65.2	4	1	3` UTR	Cha
1979	chr3R	14631604	14631742	chr3R	18805882	18806020	opus	7075	7483	8	138	4-4	74.42	4	1.6	3` UTR	CG18208
1980	chr3R	14651156	14651317	chr3R	18825434	18825595	Rt1a	358	5028	15	161	1-14	65.38	4	3	intron	CG18208
1981	chr3R	14676644	14676816	chr3R	18850922	18851094	17.6	10	452	11	172	6-5	74.85	13	0.785714	intergenic	CG18208
1982	chr3R	14837065	14837132	chr3R	19011343	19011410	ZAM	7936	8003	14	67	10-4	68.52	0	14	intron	gukh
1983	chr3R	14843375	14843453	chr3R	19017653	19017731	ZAM	7970	8048	20	78	10-10	63.07	0	20	exon	gukh
1984	chr3R	14892722	14892826	chr3R	19067000	19067104	mdg3	103	5252	11	104	7-4	72.12	1	5.5	intron	cdi
1985	chr3R	14917634	14917798	chr3R	19091912	19092076	FB	26	36	5	164	3-2	63.73	4	1	intron	cdi
1986	chr3R	14932894	14933033	chr3R	19107172	19107311	copia	5	171	5	139	2-3	76.27	0	5	intron	CG6040
1987	chr3R	14936196	14936377	chr3R	19110474	19110655	FB	7	38	5	181	4-1	62.27	7	0.625	intron	CG6040
1988	chr3R	14939577	14939757	chr3R	19113855	19114035	roo	408	8712	6	180	3-3	68.45	7	0.75	intron	CG6040
1989	chr3R	14941727	14941852	chr3R	19116005	19116130	ZAM	18	364	12	125	7-5	69.94	4	2.4	intron	CG6040
1990	chr3R	14965055	14965239	chr3R	19139333	19139517	17.6	475	6954	4	184	3-1	65.34	1	2	3` UTR	Ppcs
1991	chr3R	15006381	15006594	chr3R	19180659	19180872	ZAM	453	17	19	213	11-8	71.23	14	1.26667	5` UTR	CG31475
1992	chr3R	15046918	15047089	chr3R	19221196	19221367	jockey	4777	4981	8	171	4-4	61.58	0	8	intron	vib
1993	chr3R	15049794	15049949	chr3R	19224072	19224227	copia	4883	196	7	155	4-3	69.43	8	0.777778	intron	vib
1994	chr3R	15076328	15076493	chr3R	19250606	19250771	ZAM	7968	392	17	165	12-5	65.77	10	1.54545	intergenic	CG5217
1995	chr3R	15128512	15128650	chr3R	19302790	19302928	copia	5049	15	5	138	1-4	64.8	0	5	3` UTR	Dl
1996	chr3R	15132923	15133038	chr3R	19307201	19307316	Juan	4186	57	5	115	1-4	72.4	4	1	intron	Dl
1997	chr3R	15144885	15145111	chr3R	19319163	19319389	ZAM	8412	7963	13	226	5-8	69.59	15	0.8125	intron	Dl
[truncated: 850 more rows]

## Sheet: OSC_C_TE_Inserts
Table S4. De novo TE insertions in Drosophila gonadal cell cultures. Tab: OSC_C_TE_Inserts
Insertion#	Release 5 coordinates			Release 6 coordinates			TE	TE_coord_start	TE_coord_end	TE_Insert_Reads	Chr_Coord_Dist	Symmetry	avg_BLAT_score	RefGenome_Reads	Coverage_Ratio	Classification	Comments
	Chr	Chr_coord_start	Chr_coord_end	Chr	Chr_coord_start	Chr_coord_end
1	chr2L	72390	72520	chr2L	72390	72520	springer	7141	7523	33	130	24-9	69.39	31	1.03125	intron	galectin
2	chr2L	244275	244400	chr2L	244275	244400	FB	1	1	35	125	20-15	67.91	5	5.83333	intron	kis
3	chr2L	432413	432541	chr2L	432413	432541	gypsy	6985	7443	47	128	27-20	66.21	2	15.6667	intron	ex
4	chr2L	469166	469297	chr2L	469166	469297	gypsy	6987	461	54	131	33-21	72	11	4.5	intron	CG4297
5	chr2L	492028	492149	chr2L	492028	492149	FB	3	3	34	121	20-14	68.65	2	11.3333	intron	ush
6	chr2L	759107	759216	chr2L	759107	759216	I-element	7	5345	35	109	28-7	65.77	3	8.75	exon	GABA-B-R3
7	chr2L	961026	961149	chr2L	961026	961149	F-element	4682	13	15	123	1-14	62.6	6	2.14286	intergenic	CG4341
8	chr2L	1228684	1228816	chr2L	1228684	1228816	roo	8664	410	57	132	30-27	68.77	9	5.7	intron	CG42329
9	chr2L	1644002	1644121	chr2L	1644002	1644121	mdg1	7445	7036	22	119	16-6	63.05	2	7.33333	intergenic	not near genes
10	chr2L	1931266	1931400	chr2L	1931266	1931400	mdg3	247	5250	21	134	9-12	67.9	30	0.677419	intron	CG7337
11	chr2L	2198925	2199053	chr2L	2198925	2199053	mdg3	5255	246	15	128	13-2	66.53	13	1.07143	intergenic	not near genes
12	chr2L	2345666	2345743	chr2L	2345666	2345743	hopper	35	1396	8	77	2-6	72.5	9	0.8	intron	CG9967
13	chr2L	2361735	2361863	chr2L	2361735	2361863	gypsy	463	5	27	128	15-12	68.89	22	1.17391	intron	Rab5
14	chr2L	2374225	2374329	chr2L	2374225	2374329	hobo	2926	3	13	104	6-7	58.77	5	2.16667	intergenic	CG3597
15	chr2L	2374378	2374498	chr2L	2374378	2374498	gypsy	6988	452	17	120	8-9	65.88	0	17	intergenic	CG3597
16	chr2L	2540853	2540952	chr2L	2540853	2540952	flea	228	4762	20	99	6-14	70.85	0	20	intergenic	not near genes
17	chr2L	2635622	2635742	chr2L	2635622	2635742	copia	9	254	8	120	3-5	67.88	18	0.421053	intergenic	not near genes
18	chr2L	2703417	2703575	chr2L	2703417	2703575	412	4	493	14	158	5-9	57.79	38	0.358974	intron	CG31690
19	chr2L	2753717	2753842	chr2L	2753717	2753842	Burdock	255	6143	15	125	4-11	67.4	16	0.882353	intron	CG9894
20	chr2L	2863603	2863731	chr2L	2863603	2863731	copia	4869	253	11	128	10-1	70.91	12	0.846154	intron	CG2991
21	chr2L	2899301	2899435	chr2L	2899301	2899435	mdg3	249	5253	15	134	5-10	61.27	1	7.5	intron	lilli
22	chr2L	2918060	2918159	chr2L	2918060	2918159	297	388	6608	15	99	9-6	74.67	0	15	intron	lilli
23	chr2L	3267749	3267869	chr2L	3267749	3267869	springer	7520	11	29	120	15-14	65.28	4	5.8	intergenic	CG3347
24	chr2L	3268402	3268534	chr2L	3268402	3268534	springer	7140	387	24	132	16-8	65.58	26	0.888889	intergenic	CG3347
25	chr2L	3345367	3345497	chr2L	3345367	3345497	springer	7140	7522	23	130	12-11	70.22	31	0.71875	intron	E23
26	chr2L	3628402	3628527	chr2L	3628402	3628527	roo	6	409	21	125	7-14	68.71	11	1.75	intron	for
27	chr2L	3768376	3768483	chr2L	3768376	3768483	gypsy	7441	17	15	107	8-7	69.8	7	1.875	3` UTR	CG43707
28	chr2L	3911463	3911584	chr2L	3911463	3911584	springer	7136	7509	41	121	32-9	68.93	19	2.05	intron	fred
29	chr2L	4092387	4092535	chr2L	4092387	4092535	springer	379	7138	23	148	11-12	63.04	1	11.5	intron	ed
30	chr2L	4181058	4181184	chr2L	4181058	4181184	Transpac	4919	5223	23	126	9-14	65.09	14	1.53333	intergenic	not near genes
31	chr2L	4244663	4244796	chr2L	4244663	4244796	copia	4867	256	24	133	11-13	72.29	24	0.96	intergenic	CR44058
32	chr2L	4365557	4365684	chr2L	4365557	4365684	copia	1	253	13	127	8-5	67.54	14	0.866667	intron	Traf4
33	chr2L	4375712	4375825	chr2L	4375712	4375825	springer	382	17	18	113	8-10	68.28	17	1	intron	Traf4
34	chr2L	4403984	4404110	chr2L	4403984	4404110	roo	404	8664	21	126	12-9	69.33	11	1.75	intergenic	CG33003
35	chr2L	4746696	4746824	chr2L	4746696	4746824	pogo	2098	3	34	128	19-15	66.12	34	0.971429	intron	CG15630
36	chr2L	4760382	4760510	chr2L	4760382	4760510	blood	7388	7013	18	128	12-6	69.89	28	0.62069	intron	CG15630
37	chr2L	4776508	4776625	chr2L	4776508	4776625	roo	8670	401	22	117	9-13	68.91	16	1.29412	intron	CG15630
38	chr2L	4879328	4879449	chr2L	4879328	4879449	springer	378	5	9	121	6-3	65.89	5	1.5	intron	Cf2
39	chr2L	4892863	4892985	chr2L	4892863	4892985	I-element	5	5350	10	122	9-1	70.8	8	1.11111	intron	CG3036
40	chr2L	4916679	4916801	chr2L	4916679	4916801	springer	7520	9	17	122	8-9	71.06	2	5.66667	intron	hoe1
41	chr2L	4929450	4929576	chr2L	4929450	4929576	springer	7521	6	15	126	6-9	69.67	18	0.789474	intergenic	hoe1
42	chr2L	5064506	5064630	chr2L	5064506	5064630	Max-element	299	5	26	124	12-14	69.08	14	1.73333	intron	qtc
43	chr2L	5083000	5083117	chr2L	5083000	5083117	springer	7522	7521	39	117	27-12	67.97	2	13	intron	pgant5
44	chr2L	5083010	5083117	chr2L	5083010	5083117	gypsy3	6586	2	4	107	1-3	61.75	0	4	intron	pgant5
45	chr2L	5219222	5219341	chr2L	5219222	5219341	opus	13	498	13	119	6-7	66.54	6	1.85714	3` UTR	tkv
46	chr2L	5246727	5246851	chr2L	5246727	5246851	springer	7523	10	20	124	14-6	65.7	12	1.53846	intron	tkv
47	chr2L	5258915	5258996	chr2L	5258915	5258996	I-element	5318	4	6	81	3-3	66.67	18	0.315789	intron	tkv
48	chr2L	5291684	5291767	chr2L	5291684	5291767	opus	7028	474	18	83	10-8	77.89	0	18	intergenic	not near genes
49	chr2L	5422892	5423018	chr2L	5422892	5423018	297	6580	387	25	126	19-6	66.68	0	25	intergenic	not near genes
50	chr2L	5476149	5476279	chr2L	5476149	5476279	springer	3	7522	23	130	12-11	69.13	26	0.851852	intergenic	not near genes
51	chr2L	5481442	5481560	chr2L	5481442	5481560	mdg3	5260	240	14	118	11-3	70.29	3	3.5	intergenic	not near genes
52	chr2L	5591822	5591946	chr2L	5591822	5591946	mdg3	5491	5252	10	124	3-7	71.7	22	0.434783	intergenic	not near genes
53	chr2L	5630122	5630256	chr2L	5630122	5630256	flea	257	4756	21	134	8-13	71.14	24	0.84	intron	CG31646
54	chr2L	5711850	5711980	chr2L	5711850	5711980	412	494	2	50	130	26-24	67.42	2	16.6667	intron	CG7236
55	chr2L	5874834	5874953	chr2L	5874834	5874953	gypsy	6994	460	27	119	9-18	67.37	3	6.75	intron	CG8965
56	chr2L	5900941	5901044	chr2L	5900941	5901044	I-element	5346	10	19	103	5-14	72.37	15	1.1875	intergenic	CG9021
57	chr2L	6292772	6292903	chr2L	6292772	6292903	copia	258	4871	16	131	7-9	68.12	10	1.45455	intron	Ddr
58	chr2L	6340754	6340876	chr2L	6340754	6340876	gypsy	6996	461	26	122	11-15	66.62	20	1.2381	intron	Cpr
59	chr2L	6464818	6464944	chr2L	6464818	6464944	297	6583	390	18	126	10-8	66.33	3	4.5	intron	CG16947
60	chr2L	6466543	6466660	chr2L	6466543	6466660	blood	378	15	18	117	12-6	65.33	1	9	exon	CG9531
61	chr2L	6990737	6990862	chr2L	6990737	6990862	mdg3	5498	5258	9	125	2-7	64.33	0	9	intron	uif
62	chr2L	7025012	7025111	chr2L	7025012	7025111	springer	12	363	6	99	3-3	62.33	5	1	3` UTR	CG31908
63	chr2L	7139841	7139929	chr2L	7139841	7139929	copia	4914	258	14	88	6-8	70.79	1	7	intron	Pvf3
64	chr2L	7459534	7459615	chr2L	7459534	7459615	BS	4993	5055	17	81	12-5	69.29	0	17	intron	Gr28b
65	chr2L	7489190	7489316	chr2L	7489190	7489316	copia	250	4868	30	126	7-23	69.03	3	7.5	intron	CG42533
66	chr2L	7540933	7541066	chr2L	7540933	7541066	roo	8662	409	54	133	27-27	70.17	1	27	intron	Rapgap1
67	chr2L	7720067	7720203	chr2L	7720067	7720203	flea	4755	257	13	136	11-2	71.62	0	13	exon	CG13794
68	chr2L	7722205	7722305	chr2L	7722205	7722305	roo	411	33	28	100	18-10	69	1	14	exon	CG13794
69	chr2L	7975312	7975428	chr2L	7975312	7975428	copia	4880	252	17	116	9-8	70.59	14	1.13333	exon	Snoo
70	chr2L	7993042	7993171	chr2L	7993042	7993171	springer	7140	7521	21	129	11-10	66.57	12	1.61538	intron	pes
71	chr2L	8271455	8271609	chr2L	8271455	8271609	Dm88	14	4374	4	154	2-2	74.75	0	4	intron	Btk29A
72	chr2L	8296110	8296233	chr2L	8296110	8296233	17.6	7416	6	17	123	14-3	70.12	0	17	intron	Btk29A
73	chr2L	8417607	8417770	chr2L	8417607	8417770	springer	380	383	28	163	12-16	71.89	30	0.903226	intron	Akap200
74	chr2L	8421253	8421350	chr2L	8421253	8421350	flea	4772	4995	10	97	8-2	65.2	6	1.42857	intron	Akap200
75	chr2L	8584003	8584129	chr2L	8584003	8584129	gypsy	6	462	24	126	15-9	68.71	15	1.5	intron	Sema-1a
76	chr2L	8833170	8833288	chr2L	8833170	8833288	rover	342	6960	18	118	10-8	73.28	12	1.38462	intergenic	not near genes
77	chr2L	8856209	8856312	chr2L	8856209	8856312	mdg1	396	7040	10	103	5-5	67.4	12	0.769231	intergenic	not near genes
78	chr2L	8959896	8960006	chr2L	8959896	8960006	Ivk	5089	5372	20	110	16-4	58.3	0	20	3` UTR	CG9525
79	chr2L	9158225	9158314	chr2L	9158225	9158314	flea	4754	4969	19	89	12-7	67.11	5	3.16667	intron	CG32982
80	chr2L	9383555	9383682	chr2L	9383555	9383682	copia	4899	257	6	127	1-5	48.67	0	6	intron	Shawl
81	chr2L	9466966	9467094	chr2L	9466966	9467094	roo	408	8666	49	128	31-18	69.8	6	7	intergenic	numb
82	chr2L	9487172	9487232	chr2L	9487172	9487232	jockey	5	66	22	60	15-7	67	1	11	intergenic	not near genes
83	chr2L	9629344	9629448	chr2L	9629344	9629448	mdg1	7038	7433	19	104	5-14	66.11	1	9.5	intergenic	not near genes
84	chr2L	9722266	9722391	chr2L	9722266	9722391	copia	4869	254	4	125	2-2	65.25	0	4	intron	Nckx30C
85	chr2L	9930837	9930946	chr2L	9930837	9930946	blood	21	376	36	109	19-17	70.89	1	18	exon	CG42367
86	chr2L	9947811	9947941	chr2L	9947811	9947941	springer	7140	7522	20	130	9-11	68.35	15	1.25	intergenic	CG5853
87	chr2L	10082103	10082221	chr2L	10082103	10082221	roo	15	411	25	118	2-23	68.08	1	12.5	intron	CG44153
88	chr2L	10338372	10338438	chr2L	10338372	10338438	blood	281	346	18	66	13-5	70.06	7	2.25	exon	GATAd
89	chr2L	10808899	10809033	chr2L	10808899	10809033	Max-element	302	8234	15	134	6-9	69.33	31	0.46875	intron	Nos
90	chr2L	11064302	11064421	chr2L	11064302	11064421	springer	385	14	10	119	5-5	63.3	21	0.454545	intron	Samuel
91	chr2L	11064648	11064769	chr2L	11064648	11064769	412	488	5	11	121	9-2	67.55	4	2.2	intron	Samuel
92	chr2L	11096977	11097100	chr2L	11096977	11097100	gypsy	462	9	25	123	12-13	66.8	20	1.19048	exon	Ge-1
93	chr2L	11151426	11151560	chr2L	11151426	11151560	opus	497	7113	25	134	12-13	65.4	1	12.5	intergenic	Gyc32E
94	chr2L	11184803	11184934	chr2L	11184803	11184934	gypsy	462	6988	23	131	12-11	68.78	24	0.92	intron	Ca-beta
95	chr2L	11190517	11190600	chr2L	11190517	11190600	gypsy	7018	7431	13	83	4-9	68.23	3	3.25	intron	Ca-beta
96	chr2L	11528320	11528397	chr2L	11528320	11528397	pogo	5	2049	16	77	11-5	69.25	2	5.33333	intergenic	CG31705
97	chr2L	11591596	11591713	chr2L	11591596	11591713	412	485	6	22	117	14-8	69.86	4	4.4	5` UTR	CG15841
98	chr2L	11652280	11652412	chr2L	11652280	11652412	springer	7136	7520	18	132	10-8	68.22	5	3	intergenic	CG12307
99	chr2L	11659808	11659911	chr2L	11659808	11659911	Ivk	5	5367	5	103	4-1	69.2	14	0.333333	intergenic	CG43167
100	chr2L	11737099	11737238	chr2L	11737099	11737238	gypsy5	416	6938	21	139	11-10	67.57	34	0.6	5` UTR	CR44145
101	chr2L	11771242	11771379	chr2L	11771242	11771379	297	6960	6584	9	137	7-2	66	0	9	intergenic	not near genes
102	chr2L	11820025	11820133	chr2L	11820025	11820133	412	7078	493	12	108	3-9	64.92	0	12	intron	Pde1c
103	chr2L	11939880	11939989	chr2L	11939880	11939989	roo	402	15	20	109	11-9	66.45	3	5	intergenic	Or33b
104	chr2L	12004406	12004529	chr2L	12004406	12004529	1360	3	3386	32	123	18-14	68.19	2	10.6667	intergenic	CG6746
105	chr2L	12028761	12028891	chr2L	12028761	12028891	copia	4873	259	15	130	6-9	67.13	1	7.5	intron	dmGlut
106	chr2L	12229802	12229931	chr2L	12229802	12229931	hopper	1414	1	39	129	18-21	66.1	0	39	intergenic	not near genes
107	chr2L	12371660	12371790	chr2L	12371660	12371790	gypsy	458	6985	24	130	10-14	68.54	18	1.26316	intron	bru-2
108	chr2L	12524097	12524221	chr2L	12524097	12524221	copia	6	257	23	124	8-15	64.57	23	0.958333	intron	bun
109	chr2L	12534416	12534531	chr2L	12534416	12534531	springer	7510	6	23	115	11-12	68.52	16	1.35294	intron	bun
110	chr2L	12750833	12750961	chr2L	12750833	12750961	flea	255	4760	8	128	6-2	70.62	0	8	intergenic	not near genes
111	chr2L	12818241	12818365	chr2L	12818241	12818365	flea	4761	5011	12	124	7-5	67.67	5	2	3` UTR	kek1
112	chr2L	13036625	13036740	chr2L	13036625	13036740	roo	8674	9066	22	115	6-16	70.64	16	1.29412	intron	CG9932
113	chr2L	13085967	13086040	chr2L	13085967	13086040	Juan	4022	4168	6	73	3-3	72	4	1.2	intergenic	not near genes
114	chr2L	13338547	13338670	chr2L	13338547	13338670	297	3	6969	4	123	2-2	73.25	23	0.166667	intergenic	not near genes
115	chr2L	13362142	13362260	chr2L	13362142	13362260	17.6	492	6	11	118	9-2	68.09	0	11	intergenic	CG9377
116	chr2L	13376072	13376165	chr2L	13376072	13376165	mdg3	26	5486	5	93	3-2	66.6	0	5	3` UTR	CG6565
117	chr2L	13553778	13553887	chr2L	13553778	13553887	roo	405	18	25	109	13-12	67.2	15	1.5625	intron	kuz
118	chr2L	13574136	13574250	chr2L	13574136	13574250	297	6585	6961	5	114	3-2	71.2	0	5	intron	kuz
119	chr2L	13589026	13589137	chr2L	13589026	13589137	mdg1	7438	7037	9	111	5-4	66.67	6	1.28571	intron	kuz
120	chr2L	13611924	13612058	chr2L	13611924	13612058	gypsy	6986	463	18	134	12-6	67.72	3	4.5	intron	kuz
121	chr2L	13624171	13624304	chr2L	13624171	13624304	roo	409	8662	21	133	15-6	71.52	17	1.16667	intron	kuz
122	chr2L	13688328	13688437	chr2L	13688328	13688437	springer	7522	25	14	109	10-4	71	14	0.933333	intron	CG31814
123	chr2L	13732043	13732171	chr2L	13732043	13732171	mdg3	5255	5498	20	128	10-10	71.35	2	6.66667	intergenic	not near genes
124	chr2L	13819768	13819863	chr2L	13819768	13819863	diver	5923	224	17	95	10-7	69.65	7	2.125	3` UTR	Sos
125	chr2L	13943447	13943577	chr2L	13943447	13943577	mdg3	247	5254	12	130	3-9	68.25	20	0.571429	intron	Ance-3
126	chr2L	13957475	13957589	chr2L	13957475	13957589	gypsy	462	18	29	114	15-14	65.69	2	9.66667	intergenic	Ance-3
127	chr2L	13990230	13990356	chr2L	13990230	13990356	flea	4757	5009	18	126	14-4	72.94	15	1.125	intron	rk
128	chr2L	14009824	14009950	chr2L	14009824	14009950	pogo	2097	4	24	126	12-12	65.88	8	2.66667	intergenic	CG42692
129	chr2L	14023928	14024063	chr2L	14023928	14024063	Burdock	257	6135	17	135	8-9	64	27	0.607143	intergenic	not near genes
130	chr2L	14443369	14443481	chr2L	14443369	14443481	springer	7145	355	6	112	3-3	59.33	0	6	intergenic	not near genes
131	chr2L	14449381	14449511	chr2L	14449381	14449511	springer	4	7523	24	130	12-12	67.21	25	0.923077	intergenic	CG15283
132	chr2L	14463588	14463655	chr2L	14463588	14463655	I-element	11	5311	11	67	7-4	66	10	1	intergenic	not near genes
133	chr2L	14465551	14465617	chr2L	14465551	14465617	flea	4760	4952	7	66	3-4	77.29	1	3.5	intergenic	not near genes
134	chr2L	14498731	14498818	chr2L	14498731	14498818	I-element	5347	30	14	87	1-13	70.29	1	7	intergenic	not near genes
135	chr2L	14536833	14536963	chr2L	14536833	14536963	gypsy	2	462	35	130	20-15	65.09	20	1.66667	intergenic	not near genes
136	chr2L	14664966	14665082	chr2L	14664966	14665082	FB	5	6	14	116	9-5	67.14	12	1.07692	intron	osp
137	chr2L	14774578	14774693	chr2L	14774578	14774693	Burdock	6372	6134	14	115	8-6	67.14	19	0.7	exon	CG4650
138	chr2L	14878691	14878800	chr2L	14878691	14878800	mdg1	7454	7055	13	109	8-5	67.38	25	0.5	intergenic	CG15278
139	chr2L	14969640	14969763	chr2L	14969640	14969763	rover	10	348	30	123	5-25	66.4	3	7.5	intron	CG42313
140	chr2L	15005898	15005989	chr2L	15005898	15005989	Juan	8	4197	19	91	10-9	65.58	10	1.72727	intron	dyn-p25
141	chr2L	15168930	15169062	chr2L	15168930	15169062	Stalker2	7649	7245	23	132	12-11	67.04	1	11.5	intron	CG4168
142	chr2L	15169013	15169080	chr2L	15169013	15169080	springer	7190	7509	11	67	4-7	66.73	3	2.75	intron	CG4168
143	chr2L	15429116	15429244	chr2L	15429116	15429244	springer	1	381	19	128	7-12	71.05	20	0.904762	intergenic	not near genes
144	chr2L	15468662	15468786	chr2L	15468662	15468786	springer	7517	7141	15	124	8-7	68.13	20	0.714286	intergenic	not near genes
145	chr2L	15538790	15538862	chr2L	15538790	15538862	mdg1	368	7044	5	72	4-1	75	0	5	intergenic	not near genes
146	chr2L	15625147	15625263	chr2L	15625147	15625263	flea	4754	4996	13	116	9-4	77.23	6	1.85714	intergenic	Or35a
147	chr2L	15648894	15648996	chr2L	15648894	15648996	mdg3	242	5277	4	102	2-2	69.25	15	0.25	exon	CG4587
148	chr2L	15743637	15743751	chr2L	15743637	15743751	pogo	14	2095	34	114	16-18	68.68	0	34	intron	CycE
149	chr2L	15819692	15819823	chr2L	15819692	15819823	gypsy	6988	462	14	131	4-10	69.79	4	2.8	intergenic	not near genes
150	chr2L	15894531	15894641	chr2L	15894531	15894641	BS	5081	5074	7	110	3-4	68.29	9	0.7	intergenic	Tep1
151	chr2L	15920544	15920662	chr2L	15920544	15920662	copia	4871	245	7	118	6-1	66.43	7	0.875	intron	beat-Ib
152	chr2L	15930940	15931066	chr2L	15930940	15931066	HMS-Beagle	245	5	23	126	12-11	71.04	25	0.884615	intron	beat-Ib
153	chr2L	16025391	16025511	chr2L	16025391	16025511	1360	7	2	24	120	16-8	69.71	14	1.6	intron	beat-Ic
154	chr2L	16107671	16107731	chr2L	16107671	16107731	Doc	68	8	14	60	7-7	71.93	16	0.823529	intergenic	not near genes
155	chr2L	16215781	16215874	chr2L	16215781	16215874	roo	8697	404	19	93	10-9	73.32	15	1.1875	intergenic	CG31819
156	chr2L	16310219	16310326	chr2L	16310219	16310326	Juan	4202	3	27	107	4-23	63.26	25	1.03846	intron	cni
157	chr2L	16367223	16367342	chr2L	16367223	16367342	3S18	6	6100	10	119	7-3	66.4	1	5	intergenic	jhamt
158	chr2L	16492992	16493118	chr2L	16492992	16493118	1360	2	1	28	126	19-9	62	0	28	intron	Tpr2
159	chr2L	16538711	16538805	chr2L	16538711	16538805	copia	226	7	5	94	2-3	65.6	3	1.25	intergenic	not near genes
160	chr2L	16548008	16548111	chr2L	16548008	16548111	FB	3	21	24	103	10-14	67.08	24	0.96	intergenic	CG5968
161	chr2L	16665780	16665913	chr2L	16665780	16665913	flea	4756	256	16	133	9-7	76	16	0.941176	intron	trpgamma
162	chr2L	16686848	16686976	chr2L	16686848	16686976	gypsy	6987	458	25	128	15-10	64.24	19	1.25	intron	grp
163	chr2L	16727492	16727616	chr2L	16727492	16727616	1360	1	4	55	124	30-25	67.36	3	13.75	intron	VhaSFD
164	chr2L	16775999	16776136	chr2L	16775999	16776136	springer	7523	2	11	137	3-8	70.27	3	2.75	intron	Mhc
165	chr2L	16819689	16819820	chr2L	16819689	16819820	flea	252	4754	16	131	3-13	68.44	20	0.761905	intron	CG13280
166	chr2L	17042874	17043002	chr2L	17042874	17043002	412	4	495	27	128	18-9	64.93	0	27	3` UTR	CR43802
167	chr2L	17247434	17247532	chr2L	17247434	17247532	copia	4899	253	10	98	6-4	72	4	2	intron	beat-IIIc
168	chr2L	17450608	17450713	chr2L	17450608	17450713	springer	7138	7495	16	105	11-5	71.56	19	0.8	intergenic	dl
169	chr2L	17568841	17568963	chr2L	17568841	17568963	blood	378	7021	25	122	19-6	71.2	13	1.78571	intergenic	mir-124
170	chr2L	17685615	17685716	chr2L	17685615	17685716	412	1	7517	36	101	16-20	65.08	1	18	intron	CadN
171	chr2L	17998244	17998342	chr2L	17998244	17998342	BS	12	5075	12	98	4-8	55.08	0	12	intergenic	not near genes
172	chr2L	18018528	18018649	chr2L	18018528	18018649	gypsy	2	453	18	121	11-7	66.83	16	1.05882	intron	rdo
173	chr2L	18122911	18122972	chr2L	18122911	18122972	I-element	5300	4	6	61	1-5	69.17	6	0.857143	intron	CG5758
174	chr2L	18134654	18134773	chr2L	18134654	18134773	springer	380	9	25	119	11-14	63.96	12	1.92308	exon	kel
175	chr2L	18135354	18135470	chr2L	18135354	18135470	Quasimodo	7358	7	14	116	4-10	70.86	0	14	intron	kel
176	chr2L	18231726	18231858	chr2L	18231726	18231858	roo	8661	9070	34	132	14-20	65.5	3	8.5	intron	CG42750
177	chr2L	18338961	18339096	chr2L	18338961	18339096	mdg3	5252	250	44	135	28-16	67.5	8	4.88889	intron	Fas3
178	chr2L	18479262	18479382	chr2L	18479262	18479382	gypsy	6990	7440	26	120	12-14	66.42	13	1.85714	intron	CG10283
179	chr2L	18482422	18482544	chr2L	18482422	18482544	springer	7522	7148	17	122	7-10	72.12	4	3.4	intron	CG10283
180	chr2L	18648159	18648284	chr2L	18648159	18648284	17.6	7418	4	9	125	1-8	62.67	0	9	intron	MESR3
181	chr2L	18732771	18732869	chr2L	18732771	18732869	I-element	5342	10	8	98	2-6	66.25	28	0.275862	intergenic	CG10348
182	chr2L	18986392	18986494	chr2L	18986392	18986494	springer	7146	7500	21	102	12-9	64.43	3	5.25	intron	CG10641
183	chr2L	19090018	19090150	chr2L	19090018	19090150	Stalker2	7248	404	34	132	17-17	71.65	1	17	intron	Lim3
184	chr2L	19276986	19277101	chr2L	19276986	19277101	I-element	4	5350	15	115	10-5	71.07	16	0.882353	intergenic	not near genes
185	chr2L	19475323	19475435	chr2L	19475323	19475435	springer	381	7154	17	112	7-10	67.24	20	0.809524	intergenic	not near genes
186	chr2L	19609450	19609584	chr2L	19609450	19609584	roo	8662	409	21	134	11-10	68.05	5	3.5	intron	Lar
187	chr2L	19641022	19641146	chr2L	19641022	19641146	roo	8664	402	27	124	14-13	68.15	0	27	intron	Lar
188	chr2L	19806557	19806652	chr2L	19806557	19806652	copia	4869	220	18	95	15-3	63.89	0	18	intron	sick
189	chr2L	19859555	19859681	chr2L	19859555	19859681	gypsy	7441	6985	21	126	7-14	69.52	16	1.23529	intron	sick
190	chr2L	19908054	19908179	chr2L	19908054	19908179	roo	410	8671	44	125	18-26	65.95	3	11	intron	sick
191	chr2L	19967936	19968066	chr2L	19967936	19968066	springer	7520	7138	15	130	6-9	73.13	8	1.66667	intergenic	CG10680
192	chr2L	20323252	20323371	chr2L	20323252	20323371	gypsy	461	12	18	119	10-8	63.22	22	0.782609	intron	spir
193	chr2L	20398889	20399018	chr2L	20398889	20399018	springer	7521	7140	29	129	14-15	67.79	22	1.26087	intron	CG10947
194	chr2L	20426747	20426867	chr2L	20426747	20426867	copia	256	11	6	120	2-4	68.17	20	0.285714	intergenic	CG15130
195	chr2L	20463492	20463588	chr2L	20463492	20463588	3S18	22	6093	20	96	11-9	65.9	0	20	intergenic	cdc23
196	chr2L	20629453	20629569	chr2L	20629453	20629569	412	7070	495	39	116	12-27	69.1	2	13	intergenic	not near genes
197	chr2L	20668770	20668901	chr2L	20668770	20668901	roo	8663	9070	54	131	36-18	69.37	9	5.4	intron	CG31678
198	chr2L	20836935	20837059	chr2L	20836935	20837059	gypsy	6991	458	24	124	14-10	67.62	22	1.04348	exon	Spn38F
199	chr2L	21018190	21018322	chr2L	21018190	21018322	springer	7523	7139	23	132	13-10	69.52	26	0.851852	intron	CG42238
200	chr2L	21057569	21057676	chr2L	21057569	21057676	roo	8688	409	24	107	10-14	74.29	1	12	3` UTR	betaInt-nu
201	chr2L	21089128	21089242	chr2L	21089128	21089242	flea	256	18	25	114	9-16	73.28	2	8.33333	intergenic	CG33509
202	chr2L	21107293	21107417	chr2L	21107293	21107417	flea	250	4759	18	124	8-10	76.11	18	0.947368	3` UTR	CR44056
203	chr2L	21109200	21109304	chr2L	21109200	21109304	gypsy	25	459	16	104	6-10	67.69	15	1	intergenic	CR44056
204	chr2L	21215684	21215801	chr2L	21215684	21215801	mdg3	5268	248	6	117	5-1	69.33	42	0.139535	intron	CG8678
205	chr2L	21244605	21244730	chr2L	21244605	21244730	copia	4872	253	14	125	10-4	67.36	4	2.8	intron	Hr39
206	chr2L	21249082	21249188	chr2L	21249082	21249188	gypsy6	7416	7775	4	106	2-2	68.5	17	0.222222	intron	Hr39
207	chr2L	21249084	21249211	chr2L	21249084	21249211	springer	7136	378	23	127	15-8	68.43	23	0.958333	intron	Hr39
208	chr2L	21279273	21279650	chr2L	21279273	21279650	flea	4755	4983	38	377	20-18	72.16	23	1.58333	intron	CG8671
209	chr2L	21557117	21557234	chr2L	21557117	21557234	mdg1	7047	416	19	117	9-10	66.63	0	19	intergenic	not near genes
210	chr2L	21702451	21702569	chr2L	21702451	21702569	roo	408	8676	24	118	10-14	70.21	0	24	intron	CG31619
211	chr2L	21804258	21804393	chr2L	21804258	21804393	roo	8664	412	38	135	16-22	68.03	4	7.6	intergenic	not near genes
212	chr2L	21806988	21807121	chr2L	21806988	21807121	flea	257	4757	19	133	9-10	72.89	25	0.730769	intergenic	not near genes
213	chr2L	21924086	21924199	chr2L	21924086	21924199	flea	4754	234	15	113	12-3	73.8	11	1.25	intergenic	not near genes
214	chr2L	22065160	22065292	chr2L	22065160	22065292	flea	254	4755	21	132	9-12	71.29	26	0.777778	exon	CG42597
215	chr2L	22080664	22080793	chr2L	22080664	22080793	Transpac	4919	5226	41	129	24-17	69.46	3	10.25	exon	ttm3
216	chr2L	22094361	22094494	chr2L	22094361	22094494	flea	4755	5013	13	133	6-7	67.15	2	4.33333	intergenic	not near genes
217	chr2L	22424921	22425014	chr2L	22532189	22532282	gypsy6	20	7786	15	93	14-1	63	53	0.277778	intergenic	RpL5
218	chr2L	22443045	22443180	chr2L	22550313	22550448	springer	7135	7522	13	135	8-5	69.23	20	0.619048	5` UTR	CG17493
219	chr2L	22977152	22977233	chr2L	23084420	23084501	1360	32	3376	5	81	1-4	59.8	23	0.208333	intergenic	not near genes
220	chr2R	52200	52323	chr2R	4164695	4164818	mdg1	411	7037	5	123	4-1	66	14	0.333333	intergenic	not near genes
221	chr2R	682048	682131	chr2R	4794543	4794626	springer	7175	57	10	83	5-5	68.4	28	0.344828	intergenic	not near genes
222	chr2R	774802	774931	chr2R	4887297	4887426	flea	5011	4756	29	129	3-26	68	1	14.5	intergenic	not near genes
223	chr2R	1282543	1282672	chr2R	5395038	5395167	gtwin	479	5	5	129	2-3	76.6	20	0.238095	intergenic	not near genes
224	chr2R	1506531	1506623	chr2R	5619026	5619118	mdg1	7049	393	5	92	2-3	59.2	29	0.166667	intergenic	not near genes
225	chr2R	1562135	1562259	chr2R	5674630	5674754	S-element	1708	1710	18	124	6-12	67.56	3	4.5	intergenic	kune
226	chr2R	1681748	1681872	chr2R	5794243	5794367	springer	7	383	21	124	11-10	65.67	18	1.10526	intergenic	Or42a
227	chr2R	1842849	1842975	chr2R	5955344	5955470	mdg1	421	7043	22	126	13-9	66.14	1	11	intergenic	CG7882
228	chr2R	1943390	1943525	chr2R	6055885	6056020	flea	4754	256	26	135	20-6	69.08	10	2.36364	intron	CCHa2r
229	chr2R	2021796	2021915	chr2R	6134291	6134410	springer	7519	7147	17	119	9-8	63.12	2	5.66667	intron	EcR
230	chr2R	2058583	2058710	chr2R	6171078	6171205	micropia	457	6	29	127	16-13	70.72	2	9.66667	intergenic	Cyp6w1
231	chr2R	2068190	2068304	chr2R	6180685	6180799	flea	5009	4769	8	114	2-6	64.75	5	1.33333	intergenic	CG8343
232	chr2R	2633643	2633773	chr2R	6746138	6746268	diver	5891	228	43	130	25-18	69.98	6	6.14286	3` UTR	phtf
233	chr2R	2667244	2667371	chr2R	6779739	6779866	17.6	493	6	35	127	13-22	66.37	1	17.5	intron	Epac
234	chr2R	2705473	2705605	chr2R	6817968	6818100	blood	7011	378	49	132	28-21	68.61	3	12.25	3` UTR	koi
235	chr2R	2720483	2720606	chr2R	6832978	6833101	1360	3387	3385	38	123	18-20	67.58	3	9.5	intron	CG15236
236	chr2R	2736930	2737051	chr2R	6849425	6849546	blood	366	7010	40	121	24-16	68.08	2	13.3333	intergenic	not near genes
237	chr2R	2758622	2758730	chr2R	6871117	6871225	copia	238	4874	8	108	1-7	72.12	8	0.888889	intron	coro
238	chr2R	2779915	2780047	chr2R	6892410	6892542	HMS-Beagle2	7196	1	50	132	23-27	68.5	4	10	intron	CG30158
239	chr2R	2958507	2958639	chr2R	7071002	7071134	gypsy	6987	462	28	132	13-15	65.68	12	2.15385	intergenic	CG12836
240	chr2R	2976821	2976949	chr2R	7089316	7089444	gypsy	466	6995	25	128	13-12	70.36	21	1.13636	intergenic	not near genes
241	chr2R	3143283	3143399	chr2R	7255778	7255894	Bari1	11	1699	26	116	16-10	67.88	0	26	intergenic	not near genes
242	chr2R	3581015	3581117	chr2R	7693510	7693612	copia	11	238	17	102	13-4	67.71	16	1	intron	CG1399
243	chr2R	3670864	3670974	chr2R	7783359	7783469	copia	17	252	10	110	7-3	69.5	19	0.5	exon	cn
244	chr2R	3749616	3749698	chr2R	7862111	7862193	hopper	1371	4	14	82	6-8	70.57	1	7	intron	Dgk
245	chr2R	3955716	3955848	chr2R	8068211	8068343	springer	386	2	18	132	7-11	68.56	27	0.642857	intron	lig
246	chr2R	4008855	4008990	chr2R	8121350	8121485	flea	4754	256	22	135	19-3	73.41	27	0.785714	intron	Asap1
247	chr2R	4041162	4041265	chr2R	8153657	8153760	flea	4754	227	13	103	11-2	62.46	0	13	intron	Lpin
248	chr2R	4169493	4169565	chr2R	8281988	8282060	roo	351	2	23	72	8-15	69.39	2	7.66667	intergenic	not near genes
249	chr2R	4191758	4191838	chr2R	8304253	8304333	ZAM	55	456	16	80	3-13	74.12	2	5.33333	intergenic	not near genes
250	chr2R	4540596	4540718	chr2R	8653091	8653213	springer	7513	2	7	122	4-3	65.43	29	0.233333	intron	ptc
251	chr2R	4541560	4541689	chr2R	8654055	8654184	copia	253	4868	5	129	2-3	67.8	27	0.178571	intron	ptc
252	chr2R	4571154	4571288	chr2R	8683649	8683783	gypsy	464	6987	20	134	10-10	69.05	0	20	intergenic	Acsl
253	chr2R	4959493	4959577	chr2R	9071988	9072072	copia	213	4	18	84	5-13	68.78	14	1.2	intron	ana
254	chr2R	4973796	4973908	chr2R	9086291	9086403	Juan	2	4202	29	112	17-12	67.83	3	7.25	exon	CG13742
255	chr2R	5045277	5045337	chr2R	9157772	9157832	HMS-Beagle	6983	247	13	60	6-7	73.38	1	6.5	intergenic	CG8008
256	chr2R	5125411	5125540	chr2R	9237906	9238035	copia	4869	254	31	129	20-11	69.65	2	10.3333	intron	hig
257	chr2R	5214486	5214583	chr2R	9326981	9327078	flea	4762	226	15	97	10-5	73.2	4	3	intron	CG13739
258	chr2R	5295654	5295779	chr2R	9408149	9408274	FB	1	1	34	125	27-7	68.09	1	17	intron	wun
259	chr2R	5432195	5432318	chr2R	9544690	9544813	springer	391	7153	25	123	13-12	68.48	16	1.47059	intergenic	CG1888
260	chr2R	5586243	5586335	chr2R	9698738	9698830	I-element	1	5340	15	92	12-3	60.93	0	15	intergenic	not near genes
261	chr2R	5758478	5758575	chr2R	9870973	9871070	roo	410	35	25	97	11-14	68.32	0	25	intergenic	cbx
262	chr2R	5964163	5964287	chr2R	10076658	10076782	springer	375	7136	16	124	4-12	70.94	13	1.14286	intergenic	CG1371
263	chr2R	6005424	6005558	chr2R	10117919	10118053	gypsy	6985	462	58	134	33-25	69.36	5	9.66667	intron	CG11866
264	chr2R	6043928	6044060	chr2R	10156423	10156555	gypsy	461	6986	39	132	16-23	66.18	3	9.75	3` UTR	CG12214
265	chr2R	6056735	6056866	chr2R	10169230	10169361	gypsy	1	462	14	131	10-4	72.93	1	7	intergenic	not near genes
266	chr2R	6078479	6078592	chr2R	10190974	10191087	Stalker4	411	20	16	113	9-7	74.44	0	16	intergenic	not near genes
267	chr2R	6421931	6422065	chr2R	10534426	10534560	pogo	2099	1	39	134	27-12	67.59	2	13	intron	lola
268	chr2R	6488061	6488185	chr2R	10600556	10600680	gypsy	5	7446	35	124	18-17	68.11	0	35	intron	psq
269	chr2R	6577357	6577438	chr2R	10689852	10689933	mdg1	38	408	21	81	3-18	68.48	0	21	intron	stan
270	chr2R	6654766	6654895	chr2R	10767261	10767390	springer	7144	388	45	129	23-22	68.27	7	5.625	intron	CG33144
271	chr2R	6660003	6660123	chr2R	10772498	10772618	I-element	5350	2	22	120	8-14	68.5	12	1.69231	intron	CG33144
272	chr2R	6931872	6932008	chr2R	11044367	11044503	springer	7520	7136	31	136	16-15	68.58	2	10.3333	intron	luna
273	chr2R	6931897	6932010	chr2R	11044392	11044505	gypsy6	359	7416	5	113	3-2	64.8	0	5	intron	luna
274	chr2R	7092544	7092673	chr2R	11205039	11205168	copia	251	4866	13	129	4-9	67.77	29	0.433333	intron	shn
275	chr2R	7462512	7462703	chr2R	11575007	11575198	INE-1	148	135	7	191	3-4	66	0	7	intergenic	tou
276	chr2R	7522217	7522348	chr2R	11634712	11634843	copia	259	4872	12	131	4-8	70.33	17	0.666667	intergenic	CG9005
277	chr2R	7692498	7692624	chr2R	11804993	11805119	springer	7522	7144	34	126	14-20	68.41	2	11.3333	intron	ths
278	chr2R	7889476	7889546	chr2R	12001971	12002041	jockey	4931	4986	9	70	2-7	56.11	0	9	3` UTR	otk
279	chr2R	8417307	8417440	chr2R	12529802	12529935	roo	8662	409	37	133	25-12	70.95	5	6.16667	exon	fra
280	chr2R	8458684	8458802	chr2R	12571179	12571297	S-element	1713	1703	7	118	5-2	64.57	0	7	exon	stil
281	chr2R	8704603	8704734	chr2R	12817098	12817229	297	6583	395	23	131	12-11	69.52	3	5.75	intergenic	not near genes
282	chr2R	8782873	8783000	chr2R	12895368	12895495	rover	341	6950	18	127	2-16	70.5	3	4.5	intron	vg
283	chr2R	8890950	8891113	chr2R	13003445	13003608	mdg1	7055	7059	10	163	3-7	75.6	0	10	exon	Su(z)2
284	chr2R	9170874	9171009	chr2R	13283369	13283504	roo	411	8662	43	135	22-21	68.79	6	6.14286	intron	Dh31-R1
285	chr2R	9221404	9221524	chr2R	13333899	13334019	springer	7522	7150	27	120	17-10	65.07	13	1.92857	intron	CG44206
286	chr2R	9240987	9241112	chr2R	13353482	13353607	roo	406	8667	48	125	23-25	67.06	1	24	intron	CG44206
287	chr2R	9254766	9254858	chr2R	13367261	13367353	BS	1	5071	25	92	14-11	64.52	0	25	intergenic	not near genes
288	chr2R	9428633	9428764	chr2R	13541128	13541259	S-element	1714	1715	22	131	8-14	68.55	0	22	intron	CG6145
289	chr2R	9472371	9472502	chr2R	13584866	13584997	gypsy	6987	461	51	131	27-24	69.29	3	12.75	intron	CG6191
290	chr2R	9502885	9503012	chr2R	13615380	13615507	gtwin	7389	6920	39	127	24-15	67.46	0	39	intergenic	not near genes
291	chr2R	9548862	9548993	chr2R	13661357	13661488	3S18	342	1	33	131	13-20	68.45	2	11	intron	fas
292	chr2R	9972688	9972807	chr2R	14085183	14085302	springer	374	7136	17	119	4-13	68.65	0	17	intron	Prosap
293	chr2R	10015426	10015556	chr2R	14127921	14128051	springer	7140	385	29	130	17-12	66.55	7	3.625	intron	Prosap
294	chr2R	10193225	10193355	chr2R	14305720	14305850	roo	8665	409	46	130	22-24	67.74	9	4.6	intergenic	Shroom
295	chr2R	10226126	10226252	chr2R	14338621	14338747	copia	8	259	21	126	12-9	69.81	1	10.5	intron	Shroom
296	chr2R	10335930	10336061	chr2R	14448425	14448556	mdg3	5498	5252	12	131	5-7	67.67	31	0.375	intron	Oaz
297	chr2R	10435285	10435415	chr2R	14547780	14547910	blood	379	7014	48	130	26-22	67.21	4	9.6	intron	ttv
298	chr2R	10767653	10767769	chr2R	14880148	14880264	Stalker2	386	7246	30	116	16-14	65.77	2	10	exon	Cyp6a9
299	chr2R	10844722	10844832	chr2R	14957217	14957327	FB	4	13	33	110	20-13	66.61	0	33	intron	aPKC
300	chr2R	10882976	10883101	chr2R	14995471	14995596	1360	3379	4	21	125	17-4	62.29	0	21	intergenic	CG10265
301	chr2R	10995235	10995359	chr2R	15107730	15107854	1360	1	3385	25	124	13-12	62.2	0	25	intergenic	not near genes
302	chr2R	11062297	11062401	chr2R	15174792	15174896	mdg1	7432	7037	21	104	15-6	65.95	1	10.5	intron	igl
303	chr2R	11311583	11311687	chr2R	15424078	15424182	Transpac	4919	5201	23	104	14-9	70.61	3	5.75	intron	CG43729
304	chr2R	11505748	11505874	chr2R	15618243	15618369	copia	250	4869	21	126	11-10	68.05	0	21	intron	CG42524
305	chr2R	11581354	11581450	chr2R	15693849	15693945	Ivk	3	5372	17	96	11-6	62.29	0	17	intergenic	CG30090
306	chr2R	11671138	11671276	chr2R	15783633	15783771	springer	379	7138	11	138	5-6	65.45	3	2.75	intron	Zasp52
307	chr2R	11720226	11720325	chr2R	15832721	15832820	Transpac	22	307	19	99	15-4	67.16	0	19	intron	Poxn
308	chr2R	11802904	11803039	chr2R	15915399	15915534	copia	4868	259	31	135	18-13	70.23	5	5.16667	intron	sli
309	chr2R	11838437	11838566	chr2R	15950932	15951061	HMS-Beagle	6800	247	45	129	24-21	69.76	3	11.25	intron	Strn-Mlck
310	chr2R	11905616	11905726	chr2R	16018111	16018221	copia	255	4888	12	110	5-7	63.83	0	12	intron	CG8399
311	chr2R	12015962	12016045	chr2R	16128457	16128540	copia	23	231	7	83	5-2	63.43	10	0.636364	intron	spin
312	chr2R	12050414	12050535	chr2R	16162909	16163030	springer	8	381	20	121	16-4	63.45	0	20	intron	lbk
313	chr2R	12499371	12499503	chr2R	16611866	16611998	gypsy	7448	6986	14	132	8-6	69.43	4	2.8	intron	CG5065
314	chr2R	12614507	12614623	chr2R	16727002	16727118	springer	376	8	19	116	10-9	66.42	0	19	intron	CG30463
315	chr2R	12699908	12700046	chr2R	16812403	16812541	copia	4865	259	38	138	22-16	69.53	6	5.42857	intergenic	not near genes
316	chr2R	12991995	12992124	chr2R	17104490	17104619	springer	7522	4	37	129	20-17	63.92	9	3.7	intron	CG30456
317	chr2R	13190431	13190562	chr2R	17302926	17303057	copia	258	4871	12	131	6-6	69.75	18	0.631579	intron	mbl
318	chr2R	13291011	13291142	chr2R	17403506	17403637	copia	4869	256	24	131	18-6	69.54	5	4	intron	Sip1
319	chr2R	13446310	13446435	chr2R	17558805	17558930	copia	250	4869	22	125	7-15	73.41	2	7.33333	intron	Klp54D
320	chr2R	13560029	13560156	chr2R	17672524	17672651	P-element	1	2886	35	127	16-19	47.26	0	35	exon	P32
321	chr2R	13762798	13762927	chr2R	17875293	17875422	gypsy	3	462	44	129	25-19	72.8	0	44	intron	elk
322	chr2R	14142002	14142133	chr2R	18254497	18254628	flea	5012	4755	27	131	6-21	69.56	5	4.5	intergenic	not near genes
323	chr2R	14238330	14238438	chr2R	18350825	18350933	springer	1	7498	12	108	10-2	68.75	6	1.71429	intron	sbb
324	chr2R	14804635	14804754	chr2R	18917130	18917249	Transpac	309	4	43	119	24-19	69.26	0	43	intron	sano
325	chr2R	14805357	14805479	chr2R	18917852	18917974	roo	413	8662	34	122	10-24	71.59	0	34	intron	sano
326	chr2R	14943433	14943556	chr2R	19055928	19056051	roo	8664	401	39	123	22-17	66.46	3	9.75	intergenic	CG15116
327	chr2R	15045977	15046111	chr2R	19158472	19158606	297	395	6580	40	134	24-16	72.25	1	20	intron	ena
328	chr2R	15108877	15108950	chr2R	19221372	19221445	I-element	5344	37	17	73	7-10	64.94	0	17	intron	hppy
329	chr2R	15184122	15184226	chr2R	19296617	19296721	springer	373	7154	15	104	7-8	68.67	10	1.36364	intron	Tab2
330	chr2R	15204184	15204314	chr2R	19316679	19316809	springer	3	7522	10	130	7-3	68.8	15	0.625	intron	Rgk1
331	chr2R	15305791	15305921	chr2R	19418286	19418416	copia	2	257	9	130	6-3	68.67	24	0.36	intron	hts
332	chr2R	15506992	15507113	chr2R	19619487	19619608	FB	4	2	36	121	17-19	67.33	2	12	intron	sm
333	chr2R	15535545	15535667	chr2R	19648040	19648162	roo	8662	397	22	122	14-8	66.91	5	3.66667	intergenic	CG15905
334	chr2R	15839420	15839570	chr2R	19951915	19952065	flea	258	4755	14	150	6-8	62.5	0	14	3` UTR	CG10822
335	chr2R	16252330	16252394	chr2R	20364825	20364889	springer	7470	7498	4	64	1-3	63.75	0	4	intergenic	not near genes
336	chr2R	16277142	16277248	chr2R	20389637	20389743	flea	223	4756	12	106	5-7	68.25	0	12	intergenic	not near genes
337	chr2R	16300560	16300694	chr2R	20413055	20413189	diver	5886	226	48	134	28-20	64.81	1	24	intergenic	not near genes
338	chr2R	16324187	16324318	chr2R	20436682	20436813	17.6	492	1	26	131	19-7	69.62	2	8.66667	intron	CG12484
339	chr2R	16328518	16328639	chr2R	20441013	20441134	Tabor	487	6851	40	121	23-17	65.72	2	13.3333	intron	CG12484
340	chr2R	16361621	16361753	chr2R	20474116	20474248	copia	256	4868	18	132	4-14	63.39	0	18	intron	CG12484
341	chr2R	16489560	16489692	chr2R	20602055	20602187	gypsy	6987	462	50	132	33-17	69.88	2	16.6667	intron	bl
342	chr2R	16701367	16701429	chr2R	20813862	20813924	F-element	4617	20	10	62	3-7	64.2	0	10	intergenic	not near genes
343	chr2R	16817264	16817359	chr2R	20929759	20929854	mdg3	235	25	8	95	1-7	64.75	9	0.8	intron	Rx
344	chr2R	16925031	16925135	chr2R	21037526	21037630	springer	7153	376	9	104	5-4	69	0	9	intergenic	not near genes
345	chr2R	17091169	17091289	chr2R	21203664	21203784	flea	255	11	11	120	9-2	68.18	0	11	intron	Glycogenin
346	chr2R	17395428	17395560	chr2R	21507923	21508055	gypsy	462	6987	37	132	14-23	71.62	2	12.3333	intron	MESK2
347	chr2R	17461572	17461690	chr2R	21574067	21574185	copia	3	246	8	118	3-5	70.25	18	0.421053	intron	CG10440
348	chr2R	17620245	17620316	chr2R	21732740	21732811	I-element	1	5302	14	71	12-2	68.14	1	7	intergenic	not near genes
349	chr2R	17642904	17643035	chr2R	21755399	21755530	copia	254	4867	40	131	15-25	67.7	2	13.3333	intergenic	Grx-1
350	chr2R	17819307	17819439	chr2R	21931802	21931934	Transpac	4918	309	53	132	16-37	68.28	5	8.83333	intron	Fili
351	chr2R	18939201	18939336	chr2R	23051678	23051813	flea	257	4755	23	135	13-10	65.87	0	23	intergenic	not near genes
352	chr2R	19113287	19113421	chr2R	23225764	23225898	gypsy	7448	6985	34	134	16-18	68.68	0	34	intergenic	not near genes
353	chr2R	19241619	19241716	chr2R	23354096	23354193	gypsy	7409	6986	28	97	7-21	69.46	5	4.66667	intergenic	CG34210
354	chr2R	19320811	19320946	chr2R	23433288	23433423	roo	8661	410	38	135	25-13	75.18	4	7.6	intergenic	not near genes
355	chr2R	19495513	19495610	chr2R	23607990	23608087	mdg1	7044	394	12	97	6-6	66.33	7	1.5	intron	CG17664
356	chr2R	20126161	20126291	chr2R	24238638	24238768	mdg3	5254	247	8	130	2-6	74.25	14	0.533333	intergenic	not near genes
357	chr2R	20142417	20142542	chr2R	24254894	24255019	gypsy	7447	6992	48	125	21-27	66.06	0	48	3` UTR	nord
358	chr2R	20188685	20188857	chr2R	24301162	24301334	hopper	140	149	7	172	5-2	73.71	12	0.538462	intergenic	not near genes
359	chr2R	20638674	20638803	chr2R	24751151	24751280	flea	5001	4754	23	129	6-17	69.26	2	7.66667	intron	CG30421
360	chr2R	20739102	20739231	chr2R	24851579	24851708	opus	7114	7496	41	129	26-15	71.05	2	13.6667	intergenic	CG3650
361	chr2R	20889398	20889519	chr2R	25001875	25001996	Rt1b	4820	4820	4	121	1-3	71.75	8	0.444444	intron	zip
362	chr3L	166370	166499	chr3L	166370	166499	gypsy	6987	459	47	129	29-18	70.19	3	11.75	intron	p130CAS
363	chr3L	292639	292773	chr3L	292639	292773	springer	7136	7522	41	134	19-22	67.17	6	5.85714	intron	RhoGEF3
364	chr3L	485515	485650	chr3L	485515	485650	roo	410	8661	27	135	7-20	72.07	2	9	intron	klar
365	chr3L	780824	780948	chr3L	780824	780948	springer	7149	7525	18	124	13-5	67.11	20	0.857143	intergenic	not near genes
366	chr3L	1023206	1023338	chr3L	1023206	1023338	roo	8664	410	42	132	18-24	70.14	2	14	intron	trio
367	chr3L	1091218	1091347	chr3L	1091218	1091347	gypsy	7448	2	40	129	21-19	68.4	2	13.3333	intron	bab1
368	chr3L	1095418	1095549	chr3L	1095418	1095549	springer	7139	7522	19	131	10-9	69	14	1.26667	intron	bab1
369	chr3L	1374629	1374748	chr3L	1374629	1374748	springer	15	386	19	119	8-11	74.53	17	1.05556	intron	Ptp61F
370	chr3L	1380298	1380410	chr3L	1380298	1380410	springer	7159	7523	22	112	10-12	70.86	12	1.69231	intron	Ptp61F
371	chr3L	1567900	1568028	chr3L	1567900	1568028	springer	7522	7142	20	128	8-12	67.8	16	1.17647	intron	CG7879
372	chr3L	1748201	1748333	chr3L	1748201	1748333	flea	253	4754	42	132	8-34	71.79	9	4.2	intron	CG13921
373	chr3L	2035235	2035342	chr3L	2035235	2035342	Juan	4202	1	49	107	9-40	67.08	5	8.16667	intergenic	CG42355
374	chr3L	2037666	2037787	chr3L	2037666	2037787	mdg3	5252	236	11	121	10-1	62.82	65	0.166667	exon	CG42355
375	chr3L	2216507	2216625	chr3L	2216507	2216625	jockey	4987	8	36	118	14-22	65.28	0	36	intergenic	not near genes
376	chr3L	2371864	2371993	chr3L	2371864	2371993	gypsy	461	6989	51	129	31-20	67.16	7	6.375	5` UTR	CG1317
377	chr3L	2376358	2376494	chr3L	2376358	2376494	mdg1	37	7069	4	136	2-2	77.5	2	1.33333	exon	CG9004
378	chr3L	2474062	2474196	chr3L	2474062	2474196	roo	8662	410	39	134	19-20	69.59	3	9.75	intergenic	CG16762
379	chr3L	2530481	2530612	chr3L	2530481	2530612	gypsy	461	6987	77	131	31-46	68.39	6	11	intron	Spn
380	chr3L	2584219	2584346	chr3L	2584219	2584346	copia	4871	254	34	127	22-12	67.94	5	5.66667	intron	msn
381	chr3L	2634666	2634790	chr3L	2634666	2634790	springer	7521	7145	25	124	13-12	67.76	26	0.925926	intron	CG42245
382	chr3L	2844648	2844775	chr3L	2844648	2844775	hobo	4	2708	55	127	32-23	68.24	5	9.16667	intron	CG43444
383	chr3L	2875242	2875334	chr3L	2875242	2875334	springer	7151	7495	17	92	14-3	61.82	23	0.708333	intron	CG43444
384	chr3L	3240486	3240614	chr3L	3240486	3240614	diver	225	5891	72	128	39-33	64.4	6	10.2857	intergenic	CG17746
385	chr3L	3611418	3611544	chr3L	3611418	3611544	copia	3	254	14	126	8-6	67.71	21	0.636364	intergenic	Eip63E
386	chr3L	3671543	3671617	chr3L	3671543	3671617	roo	8720	408	14	74	2-12	58.21	0	14	intergenic	not near genes
387	chr3L	3715391	3715594	chr3L	3715391	3715594	springer	5	383	6	203	1-5	66.33	6	0.857143	intergenic	CG43089
388	chr3L	3733024	3733158	chr3L	3733024	3733158	springer	385	7136	38	134	20-18	66.82	6	5.42857	intron	CG32264
389	chr3L	3733050	3733157	chr3L	3733050	3733157	gypsy6	360	7419	5	107	4-1	60.4	6	0.714286	intron	CG32264
390	chr3L	3739048	3739166	chr3L	3739048	3739166	297	1	6962	9	118	8-1	64.67	2	3	intron	CG32264
391	chr3L	3798557	3798663	chr3L	3798557	3798663	1360	5	18	23	106	17-6	65.7	0	23	intergenic	not near genes
392	chr3L	3901968	3902090	chr3L	3901968	3902090	springer	7142	379	17	122	7-10	68	15	1.0625	intron	Ubi-p63E
393	chr3L	3993793	3993914	chr3L	3993793	3993914	mdg3	5262	246	6	121	3-3	69.83	15	0.375	3` UTR	scrt
394	chr3L	4127461	4127545	chr3L	4127461	4127545	jockey	4983	4775	24	84	12-12	61.42	0	24	intron	ens
395	chr3L	4154223	4154349	chr3L	4154223	4154349	opus	1	7496	4	126	2-2	74	2	1.33333	exon	nab
396	chr3L	4348489	4348604	chr3L	4348489	4348604	copia	255	12	12	115	4-8	62.75	3	3	intron	Cip4
397	chr3L	4464675	4464793	chr3L	4464675	4464793	opus	9	493	32	118	12-20	73.59	0	32	intergenic	CG15024
398	chr3L	4546870	4546990	chr3L	4546870	4546990	springer	15	387	16	120	9-7	68.44	12	1.23077	intron	CG11357
399	chr3L	4616054	4616180	chr3L	4616054	4616180	springer	7520	7142	18	126	7-11	71.83	8	2	intron	Src64B
400	chr3L	4777074	4777179	chr3L	4777074	4777179	copia	4896	257	30	105	11-19	69.8	7	3.75	intron	Gef64C
401	chr3L	4846368	4846482	chr3L	4846368	4846482	roo	409	8661	37	114	24-13	67.54	0	37	intergenic	not near genes
402	chr3L	4987312	4987401	chr3L	4987312	4987401	I-element	5328	3	22	89	4-18	66.5	0	22	intron	Con
403	chr3L	5009570	5009694	chr3L	5009570	5009694	297	385	6580	29	124	18-11	74.79	4	5.8	intron	Con
404	chr3L	5043564	5043693	chr3L	5043564	5043693	roo	7	413	33	129	13-20	74.58	11	2.75	intron	Con
405	chr3L	5063658	5063791	chr3L	5063658	5063791	mdg3	251	5255	16	133	8-8	71.56	2	5.33333	intron	Con
406	chr3L	5174172	5174308	chr3L	5181072	5181208	gypsy	6985	7445	39	136	23-16	67.1	6	5.57143	intron	shep
407	chr3L	5190535	5190667	chr3L	5197435	5197567	mdg3	5256	251	17	132	8-9	70.47	5	2.83333	intron	shep
408	chr3L	5216152	5216253	chr3L	5223052	5223153	copia	226	4869	20	101	6-14	70.8	3	5	intron	shep
409	chr3L	5347155	5347275	chr3L	5354055	5354175	springer	7521	1	39	120	12-27	62.92	0	39	intron	lama
410	chr3L	5383941	5384024	chr3L	5390841	5390924	I-element	5333	5349	4	83	2-2	70.5	23	0.166667	intergenic	not near genes
411	chr3L	5431818	5431944	chr3L	5438718	5438844	hopper	1	2	30	126	20-10	67.7	1	15	intron	CG34391
412	chr3L	5491752	5491869	chr3L	5498652	5498769	gypsy	4	7442	43	117	16-27	64.19	0	43	intron	blanks
413	chr3L	5507217	5507318	chr3L	5514117	5514218	I-element	6	5344	33	101	28-5	63.91	0	33	intron	Lkr
414	chr3L	5755839	5755961	chr3L	5762739	5762861	Tabor	3	479	25	122	16-9	65.16	0	25	intron	CG10576
415	chr3L	6304245	6304375	chr3L	6311145	6311275	copia	2	257	30	130	15-15	69.5	3	7.5	intergenic	not near genes
416	chr3L	6396347	6396452	chr3L	6403247	6403352	3S18	6089	9	18	105	8-10	61.94	0	18	intron	CG42747
417	chr3L	7141835	7142017	chr3L	7148735	7148917	gypsy	7191	204	4	182	2-2	68	0	4	intron	corn
418	chr3L	7312801	7312921	chr3L	7319701	7319821	297	1	383	9	120	6-3	68	1	4.5	intergenic	CG8607
419	chr3L	7588589	7588707	chr3L	7595489	7595607	springer	7522	15	41	118	22-19	66.1	6	5.85714	intron	CG33275
420	chr3L	7641202	7641328	chr3L	7648102	7648228	Tc3	317	316	4	126	2-2	75.5	1	2	intergenic	CG32373
421	chr3L	7641210	7641320	chr3L	7648110	7648220	1360	3387	3386	28	110	16-12	68.64	1	14	intergenic	CG32373
422	chr3L	7898491	7898601	chr3L	7905391	7905501	copia	248	4882	6	110	2-4	68	6	0.857143	intron	pbl
423	chr3L	7952361	7952489	chr3L	7959261	7959389	roo	9068	8663	25	128	7-18	65.8	4	5	intergenic	not near genes
424	chr3L	8001926	8002051	chr3L	8008826	8008951	springer	7522	8	13	125	2-11	70.38	8	1.44444	intron	nmo
425	chr3L	8012549	8012678	chr3L	8019449	8019578	springer	6	7525	20	129	14-6	70.2	6	2.85714	intron	nmo
426	chr3L	8063259	8063386	chr3L	8070159	8070286	mdg3	241	5251	59	127	28-31	67.63	3	14.75	intron	Ect4
427	chr3L	8391680	8391810	chr3L	8398580	8398710	springer	7139	7521	27	130	16-11	68.56	2	9	intron	CG7120
428	chr3L	8836639	8836762	chr3L	8843539	8843662	opus	4	493	28	123	16-12	70.96	15	1.75	intron	dally
429	chr3L	8841406	8841533	chr3L	8848306	8848433	flea	256	4762	19	127	7-12	71.47	1	9.5	intron	dally
430	chr3L	8841904	8841974	chr3L	8848804	8848874	I-element	18	5319	4	70	3-1	61.75	8	0.444444	intron	dally
431	chr3L	8848255	8848374	chr3L	8855155	8855274	springer	7149	7520	24	119	13-11	68.29	12	1.84615	intron	dally
432	chr3L	8871122	8871240	chr3L	8878022	8878140	springer	7521	7151	16	118	10-6	66.69	16	0.941176	intron	dally
433	chr3L	9094412	9094513	chr3L	9101312	9101413	copia	4872	247	8	101	5-3	63.25	0	8	intergenic	not near genes
434	chr3L	9142872	9142982	chr3L	9149772	9149882	gypsy	6986	7426	22	110	12-10	64.95	0	22	intergenic	Rdl
435	chr3L	9226996	9227117	chr3L	9233896	9234017	Stalker2	7645	7252	15	121	8-7	61.53	18	0.789474	intergenic	CG4483
436	chr3L	9679412	9679479	chr3L	9686312	9686379	Quasimodo	17	7363	8	67	3-5	55.5	0	8	intron	CG6767
437	chr3L	9682588	9682722	chr3L	9689488	9689622	mdg3	248	5251	23	134	13-10	68.04	26	0.851852	intron	CG6767
438	chr3L	9803622	9803742	chr3L	9810522	9810642	roo	9060	8663	22	120	13-9	68.82	4	4.4	intergenic	CG32052
439	chr3L	9851328	9851459	chr3L	9858228	9858359	pogo	1	2099	22	131	10-12	71.68	22	0.956522	intron	CG10809
440	chr3L	9957461	9957568	chr3L	9964361	9964468	flea	4997	4762	7	107	1-6	62.86	4	1.4	intron	CG34356
441	chr3L	10217564	10217695	chr3L	10224464	10224595	pogo	2100	2	39	131	19-20	67.46	0	39	intron	scramb1
442	chr3L	10251554	10251651	chr3L	10258454	10258551	Juan	4200	4026	7	97	4-3	65.86	18	0.368421	intergenic	not near genes
443	chr3L	10384120	10384246	chr3L	10391020	10391146	roo	409	5	20	126	12-8	67.55	3	5	intergenic	not near genes
444	chr3L	10446663	10446762	chr3L	10453563	10453662	roo	411	32	11	99	7-4	70.36	0	11	intergenic	not near genes
445	chr3L	10660363	10660447	chr3L	10667263	10667347	flea	213	4762	15	84	6-9	72.87	7	1.875	intron	simj
446	chr3L	10823809	10823908	chr3L	10830709	10830808	copia	27	251	5	99	3-2	75.6	0	5	intergenic	not near genes
447	chr3L	10887011	10887127	chr3L	10893911	10894027	412	20	498	23	116	7-16	68.09	23	0.958333	intergenic	Cpr67Fa2
448	chr3L	10907655	10907780	chr3L	10914555	10914680	412	1	488	24	125	8-16	67	18	1.26316	intergenic	not near genes
449	chr3L	11021449	11021578	chr3L	11028349	11028478	mdg3	5494	5250	10	129	1-9	63.9	12	0.769231	exon	CG32081
450	chr3L	11151630	11151761	chr3L	11158530	11158661	Stalker2	2	405	17	131	8-9	70.29	4	3.4	exon	CG32082
451	chr3L	11180924	11181039	chr3L	11187824	11187939	jockey	37	4987	16	115	10-6	61.31	13	1.14286	intron	GlcAT-P
452	chr3L	11208841	11208901	chr3L	11215741	11215801	P-element	51	2870	16	60	9-7	36.19	3	4	intron	CG42671
453	chr3L	11233293	11233413	chr3L	11240193	11240313	gypsy	7442	5	6	120	5-1	66.33	1	3	intergenic	not near genes
454	chr3L	11446607	11446712	chr3L	11453507	11453612	297	6581	383	12	105	7-5	61	0	12	intergenic	not near genes
455	chr3L	11513926	11514052	chr3L	11520826	11520952	roo	8663	409	22	126	11-11	66.09	4	4.4	intergenic	CG7512
456	chr3L	11514371	11514485	chr3L	11521271	11521385	17.6	493	6944	14	114	3-11	71.14	0	14	3` UTR	CG11714
457	chr3L	11529950	11530041	chr3L	11536850	11536941	hobo	2907	5	17	91	6-11	72.82	10	1.54545	intron	Mob2
458	chr3L	11582324	11582403	chr3L	11589224	11589303	Transpac	273	4935	7	79	3-4	70.86	0	7	intergenic	rt
459	chr3L	11587883	11588009	chr3L	11594783	11594909	mdg3	5495	5254	12	126	4-8	63.42	2	4	intergenic	CG7368
460	chr3L	11750024	11750145	chr3L	11756924	11757045	297	6972	6581	7	121	3-4	77.57	7	0.875	intron	CG6024
461	chr3L	11812234	11812322	chr3L	11819134	11819222	17.6	6959	7407	8	88	4-4	71.62	1	4	intron	CG5946
462	chr3L	11826316	11826425	chr3L	11833216	11833325	springer	7519	21	25	109	12-13	71.44	24	1	5` UTR	CycA
463	chr3L	11866626	11866750	chr3L	11873526	11873650	flea	5004	4754	21	124	8-13	71.62	8	2.33333	intergenic	CG5906
464	chr3L	11870907	11871025	chr3L	11877807	11877925	3S18	329	1	15	118	2-13	68.53	17	0.833333	intergenic	CG14128
465	chr3L	11977542	11977660	chr3L	11984442	11984560	springer	12	7519	16	118	12-4	69.94	11	1.33333	intergenic	CG43896
466	chr3L	11978986	11979111	chr3L	11985886	11986011	Tabor	485	6	19	125	12-7	63.16	21	0.863636	intron	CG6938
467	chr3L	12068741	12068856	chr3L	12075641	12075756	pogo	9	2091	13	115	5-8	61.77	0	13	intron	Sema-5c
468	chr3L	12072307	12072432	chr3L	12079207	12079332	mdg1	420	7043	16	125	13-3	65.5	15	1	intron	Sema-5c
469	chr3L	12086360	12086483	chr3L	12093260	12093383	gypsy	3	7448	22	123	16-6	72.23	8	2.44444	intergenic	not near genes
470	chr3L	12180435	12180542	chr3L	12187335	12187442	rover	12	334	10	107	2-8	70.8	7	1.25	3` UTR	CG6910
471	chr3L	12224267	12224385	chr3L	12231167	12231285	roo	8675	9070	21	118	13-8	65.76	20	1	intron	app
472	chr3L	12642124	12642247	chr3L	12649024	12649147	roo	8673	410	29	123	13-16	69.66	29	0.966667	intergenic	CG32111
473	chr3L	12652448	12652562	chr3L	12659348	12659462	springer	7515	15	19	114	10-9	60.32	0	19	intergenic	not near genes
474	chr3L	12676876	12677006	chr3L	12683776	12683906	springer	383	1	17	130	8-9	74.06	4	3.4	intergenic	not near genes
475	chr3L	12793809	12793939	chr3L	12800709	12800839	copia	2	257	12	130	7-5	73.25	24	0.48	intron	Atg1
476	chr3L	12856763	12856885	chr3L	12863663	12863785	Transpac	1	301	30	122	16-14	69.57	8	3.33333	intergenic	CG32107
477	chr3L	12906587	12906702	chr3L	12913487	12913602	gypsy	15	7447	4	115	3-1	67	3	1	exon	CG32115
478	chr3L	12940089	12940207	chr3L	12946989	12947107	297	6960	6580	15	118	4-11	67.6	12	1.15385	intergenic	not near genes
479	chr3L	12958500	12958618	chr3L	12965400	12965518	hobo	2936	7	17	118	9-8	65.53	17	0.944444	intron	Or69a
480	chr3L	13015294	13015424	chr3L	13022194	13022324	gtwin	475	2	26	130	11-15	70.42	31	0.8125	intron	CG11255
481	chr3L	13253035	13253170	chr3L	13259935	13260070	gypsy	6986	460	5	135	3-2	68.2	10	0.454545	intron	caps
482	chr3L	13332786	13332904	chr3L	13339686	13339804	copia	257	4883	8	118	3-5	64.75	8	0.888889	intergenic	not near genes
483	chr3L	13484066	13484187	chr3L	13490966	13491087	copia	250	4873	22	121	3-19	70.23	15	1.375	intron	CG10741
484	chr3L	13491159	13491283	chr3L	13498059	13498183	gypsy	460	6987	12	124	5-7	68.08	13	0.857143	intron	CG10741
485	chr3L	13495785	13495891	chr3L	13502685	13502791	Juan	4204	1	13	106	5-8	64.08	23	0.541667	intergenic	CG10741
486	chr3L	13574947	13575049	chr3L	13581847	13581949	hobo	3	2916	13	102	11-2	61.77	1	6.5	intron	bru-3
487	chr3L	13609976	13610104	chr3L	13616876	13617004	hobo	2709	2	12	128	10-2	72.5	12	0.923077	intron	bru-3
488	chr3L	13647279	13647406	chr3L	13654179	13654306	hobo	4	2708	22	127	8-14	72.95	7	2.75	intron	bru-3
489	chr3L	13681811	13681924	chr3L	13688711	13688824	Stalker4	5	396	13	113	2-11	65.46	13	0.928571	intron	bru-3
490	chr3L	13724426	13724558	chr3L	13731326	13731458	Burdock	6137	256	19	132	15-4	66.95	23	0.791667	intron	bru-3
491	chr3L	13750822	13750945	chr3L	13757722	13757845	roo	8663	400	25	123	16-9	68.52	25	0.961538	intron	bru-3
492	chr3L	14043055	14043180	chr3L	14049955	14050080	pogo	5	2096	11	125	4-7	65.64	0	11	intergenic	blue
493	chr3L	14232575	14232688	chr3L	14239475	14239588	mdg1	7440	7054	5	113	4-1	67.8	8	0.555556	intergenic	CG7906
494	chr3L	14292493	14292558	chr3L	14299393	14299458	F-element	68	3	8	65	4-4	73.62	8	0.888889	intron	fz
495	chr3L	14319884	14320211	chr3L	14326784	14327111	springer	7179	7161	8	327	1-7	64.12	55	0.142857	intron	fz
496	chr3L	14390067	14390127	chr3L	14396967	14397027	BS	5010	5048	5	60	3-2	62	0	5	intergenic	not near genes
497	chr3L	14418129	14418242	chr3L	14425029	14425142	gypsy	7442	12	13	113	8-5	71.08	22	0.565217	intron	bbg
498	chr3L	14527065	14527157	chr3L	14533965	14534057	copia	221	4	13	92	3-10	68.46	13	0.928571	intron	bbg
499	chr3L	14634139	14634256	chr3L	14641039	14641156	roo	404	8673	21	117	9-12	67.48	15	1.3125	intron	dlp
500	chr3L	14717699	14717782	chr3L	14724599	14724682	mdg3	5498	47	10	83	2-8	77.9	0	10	intron	ome
501	chr3L	14812559	14812678	chr3L	14819459	14819578	pogo	10	2096	12	119	3-9	67	0	12	intron	CG17839
502	chr3L	14875852	14875968	chr3L	14882752	14882868	hobo	2710	15	11	116	2-9	70.73	0	11	intergenic	CG17839
503	chr3L	14894139	14894272	chr3L	14901039	14901172	roo	8663	410	20	133	10-10	72.7	3	5	intergenic	DCX-EMAP
504	chr3L	14994592	14994710	chr3L	15001492	15001610	mdg3	235	5254	6	118	1-5	72.83	1	3	3` UTR	Reck
505	chr3L	15092633	15092747	chr3L	15099533	15099647	G4	3834	3803	12	114	7-5	63.08	5	2	intergenic	Aats-gly
506	chr3L	15100178	15100305	chr3L	15107078	15107205	gypsy	454	6985	15	127	2-13	70.07	6	2.14286	intron	CTPsyn
507	chr3L	15176132	15176254	chr3L	15183032	15183154	springer	11	7522	29	122	13-16	66.52	27	1.03571	intergenic	not near genes
508	chr3L	15216311	15216396	chr3L	15223211	15223296	copia	241	4900	6	85	4-2	67.33	5	1	intergenic	not near genes
509	chr3L	15321348	15321473	chr3L	15328248	15328373	HMS-Beagle2	7195	7	13	125	7-6	71.38	4	2.6	intergenic	not near genes
510	chr3L	15441681	15441784	chr3L	15448581	15448684	I-element	5339	2	18	103	3-15	63.89	14	1.2	intergenic	not near genes
511	chr3L	15494870	15494965	chr3L	15501770	15501865	1360	3383	19	18	95	9-9	60.06	0	18	intron	CG7272
512	chr3L	15527363	15527493	chr3L	15534263	15534393	springer	7521	2	21	130	7-14	69.38	24	0.84	intergenic	CrebA
513	chr3L	15527394	15527498	chr3L	15534294	15534398	gypsy6	354	7416	4	104	2-2	67	25	0.153846	intergenic	CrebA
514	chr3L	15533186	15533269	chr3L	15540086	15540169	springer	7146	343	8	83	3-5	72.88	0	8	intron	CrebA
515	chr3L	16005390	16005524	chr3L	16012290	16012424	HMS-Beagle	246	6794	23	134	8-15	67.7	17	1.27778	intergenic	mib1
516	chr3L	16053856	16053952	chr3L	16060756	16060852	copia	222	1	4	96	1-3	66.5	8	0.444444	intron	Mbs
517	chr3L	16130381	16130446	chr3L	16137281	16137346	Juan	4026	4168	8	65	5-3	64.12	6	1.14286	5` UTR	CG5157
518	chr3L	16238838	16238922	chr3L	16245738	16245822	roo	9023	8662	16	84	5-11	69.81	12	1.23077	intergenic	not near genes
519	chr3L	16255879	16256006	chr3L	16262779	16262906	Transpac	4918	5223	23	127	13-10	68.78	30	0.741935	5` UTR	CG13071
520	chr3L	16456233	16456335	chr3L	16463133	16463235	roo	8681	397	15	102	5-10	70.73	2	5	intron	CG33158
521	chr3L	16477061	16477165	chr3L	16483961	16484065	Juan	4203	4026	12	104	2-10	65.25	1	6	intron	CG33158
522	chr3L	16554548	16554664	chr3L	16561448	16561564	roo	8665	395	17	116	8-9	67.76	7	2.125	intergenic	Mipp1
523	chr3L	16638030	16638154	chr3L	16644930	16645054	roo	8668	406	17	124	8-9	72.12	8	1.88889	intron	Abl
524	chr3L	16655528	16655590	chr3L	16662428	16662490	jockey	4816	4754	11	62	6-5	70.55	1	5.5	intergenic	Baldspot
525	chr3L	16674691	16674804	chr3L	16681591	16681704	gypsy	7442	6999	31	113	12-19	67.9	17	1.72222	intron	Lasp
526	chr3L	16718590	16718717	chr3L	16725490	16725617	opus	6	499	13	127	8-5	69.92	0	13	intergenic	Dab
527	chr3L	16795449	16795581	chr3L	16802349	16802481	gypsy	6987	462	42	132	22-20	66.5	10	3.81818	intergenic	CG9674
528	chr3L	16795738	16795868	chr3L	16802638	16802768	blood	1	7389	24	130	15-9	66	22	1.04348	intergenic	CG9674
529	chr3L	16796211	16796338	chr3L	16803111	16803238	copia	4870	253	18	127	12-6	69.5	46	0.382979	intergenic	CG9674
530	chr3L	16816500	16816620	chr3L	16823400	16823520	roo	8663	397	21	120	13-8	67.29	12	1.61538	intron	CG13024
531	chr3L	16880109	16880215	chr3L	16887009	16887115	roo	9047	8664	18	106	5-13	70	10	1.63636	intron	Lmpt
532	chr3L	16912833	16912954	chr3L	16919733	16919854	R1A1-element	4880	5331	18	121	7-11	68.39	24	0.72	intron	Lmpt
533	chr3L	17046803	17046901	chr3L	17053703	17053801	pogo	10	2075	16	98	8-8	68	0	16	intron	rogdi
534	chr3L	17132177	17132283	chr3L	17139077	17139183	roo	8682	402	23	106	10-13	69	12	1.76923	intron	Rbp6
535	chr3L	17165820	17165938	chr3L	17172720	17172838	roo	397	2	12	118	5-7	71.67	0	12	intron	Rbp6
536	chr3L	17171337	17171408	chr3L	17178237	17178308	3S18	5780	296	10	71	9-1	64.7	2	3.33333	intron	Rbp6
537	chr3L	17200738	17200835	chr3L	17207638	17207735	297	365	6587	5	97	1-4	73.2	0	5	intron	Rbp6
538	chr3L	17211366	17211487	chr3L	17218266	17218387	gypsy	11	462	18	121	7-11	66.28	21	0.818182	intron	Rbp6
539	chr3L	17236367	17236485	chr3L	17243267	17243385	Tc3	238	235	4	118	1-3	64.75	17	0.222222	intergenic	CG6512
540	chr3L	17290750	17290873	chr3L	17297650	17297773	roo	408	7	25	123	14-11	70.52	21	1.13636	intergenic	not near genes
541	chr3L	17345468	17345587	chr3L	17352368	17352487	412	7543	9	18	119	11-7	66.83	1	9	intergenic	Mip
542	chr3L	17403306	17403434	chr3L	17410206	17410334	copia	4876	260	11	128	5-6	70.55	13	0.785714	intron	blot
543	chr3L	17711920	17712039	chr3L	17718820	17718939	springer	14	7522	22	119	13-9	70.73	19	1.1	intron	Ccn
544	chr3L	17758241	17758374	chr3L	17765141	17765274	gypsy	464	1	28	133	13-15	66.89	5	4.66667	intergenic	Adgf-A
545	chr3L	17758312	17758401	chr3L	17765212	17765301	I-element	8	5327	11	89	8-3	63.91	0	11	intergenic	Adgf-A
546	chr3L	17761206	17761335	chr3L	17768106	17768235	Quasimodo	2	7366	6	129	2-4	74.33	13	0.428571	intergenic	not near genes
547	chr3L	17772159	17772288	chr3L	17779059	17779188	flea	251	4757	21	129	7-14	71.24	24	0.84	intergenic	not near genes
548	chr3L	17829665	17829788	chr3L	17836565	17836688	gypsy	6987	453	21	123	15-6	70.9	11	1.75	intron	Grd
549	chr3L	17871235	17871355	chr3L	17878135	17878255	roo	409	11	22	120	18-4	67.64	21	1	intergenic	CG7408
550	chr3L	17918188	17918315	chr3L	17925088	17925215	gypsy	7445	1	27	127	5-22	65.56	4	5.4	intergenic	not near genes
551	chr3L	17935322	17935443	chr3L	17942222	17942343	blood	7013	7381	27	121	14-13	66.96	17	1.5	intron	CG43174
552	chr3L	18165533	18165658	chr3L	18172433	18172558	gypsy	6986	455	17	125	11-6	71	3	4.25	intron	W
553	chr3L	18189053	18189187	chr3L	18195953	18196087	gypsy	6985	6985	46	134	19-27	69.87	9	4.6	intergenic	not near genes
554	chr3L	18230425	18230547	chr3L	18237325	18237447	S-element	1712	1708	16	122	8-8	68.94	7	2	intergenic	not near genes
555	chr3L	18273212	18273344	chr3L	18280112	18280244	copia	258	1	8	132	3-5	68.5	10	0.727273	intergenic	not near genes
556	chr3L	18456505	18456580	chr3L	18463405	18463480	gypsy5	410	57	10	75	6-4	67.1	9	1	intergenic	CG32196
557	chr3L	18503496	18503619	chr3L	18510396	18510519	roo	408	8671	18	123	10-8	69.06	21	0.818182	intergenic	not near genes
558	chr3L	18549031	18549113	chr3L	18555931	18556013	opus	7025	7473	11	82	8-3	75.45	0	11	intergenic	not near genes
559	chr3L	18609271	18609402	chr3L	18616171	18616302	springer	1	7521	8	131	2-6	68.75	11	0.666667	3` UTR	CG13380
560	chr3L	18625651	18625764	chr3L	18632551	18632664	FB	3	11	17	113	11-6	67.88	10	1.54545	intron	MYPT-75D
561	chr3L	18636981	18637088	chr3L	18643881	18643988	FB	14	6	18	107	7-11	60.94	3	4.5	intron	MYPT-75D
562	chr3L	18717105	18717226	chr3L	18724005	18724126	297	389	6587	19	121	12-7	66.32	3	4.75	5` UTR	CR43985
563	chr3L	18729926	18730054	chr3L	18736826	18736954	roo	8667	409	16	128	9-7	71.25	14	1.06667	intergenic	not near genes
564	chr3L	18806512	18806605	chr3L	18813412	18813505	gypsy	1	7411	16	93	11-5	69.62	1	8	intron	CG14073
565	chr3L	18807862	18807984	chr3L	18814762	18814884	gypsy	6990	459	26	122	17-9	68.38	13	1.85714	intron	CG14073
566	chr3L	18839217	18839346	chr3L	18846117	18846246	17.6	4	493	12	129	7-5	67.5	1	6	5` UTR	Indy
567	chr3L	18988211	18988337	chr3L	18995111	18995237	S-element	1714	6	12	126	7-5	69	19	0.6	intron	CG18135
568	chr3L	19105924	19106052	chr3L	19112824	19112952	blood	7008	371	23	128	15-8	69.3	17	1.27778	intron	CG14082
569	chr3L	19174410	19174506	chr3L	19181310	19181406	I-element	1	5330	12	96	9-3	66.25	7	1.5	intron	fz2
570	chr3L	19212332	19212562	chr3L	19219232	19219462	springer	7519	383	26	230	8-18	65.46	11	2.16667	intron	fz2
571	chr3L	19291357	19291957	chr3L	19298257	19298857	springer	115	368	54	600	28-26	66.35	135	0.397059	intron	fal
572	chr3L	19430317	19430432	chr3L	19437217	19437332	hopper	10	1409	13	115	7-6	63.23	12	1	intergenic	not near genes
573	chr3L	19449089	19449223	chr3L	19455989	19456123	roo	1	412	21	134	11-10	71.81	40	0.512195	intergenic	not near genes
574	chr3L	19535264	19535393	chr3L	19542164	19542293	roo	410	3	23	129	11-12	68.17	18	1.21053	exon	CG9279
575	chr3L	19567136	19567260	chr3L	19574036	19574160	gypsy	7446	6992	9	124	2-7	68.67	5	1.5	intron	Shal
576	chr3L	19568760	19568886	chr3L	19575660	19575786	gypsy	6	462	29	126	14-15	66.86	13	2.07143	intron	Shal
577	chr3L	19641954	19642026	chr3L	19648854	19648926	springer	21	345	13	72	11-2	64.77	6	1.85714	intron	Oat
578	chr3L	19642377	19642509	chr3L	19649277	19649409	297	394	6581	24	132	11-13	72.79	17	1.33333	intron	Oat
579	chr3L	19944272	19944352	chr3L	19951172	19951252	Ivk	3	5338	12	80	8-4	68	2	4	intron	Ac76E
580	chr3L	20177869	20177965	chr3L	20184769	20184865	copia	226	5	13	96	4-9	73.85	7	1.625	intron	CG42674
581	chr3L	20190690	20190809	chr3L	20197590	20197709	springer	7150	7521	23	119	8-15	66.17	21	1.04545	5` UTR	CG42674
582	chr3L	20248034	20248131	chr3L	20254934	20255031	roo	410	8700	22	97	14-8	68.91	11	1.83333	intron	CG13814
583	chr3L	20265924	20265998	chr3L	20272824	20272898	roo	9	9024	16	74	12-4	66.62	3	4	intron	gogo
584	chr3L	20354765	20354867	chr3L	20361665	20361767	pogo	2098	29	15	102	12-3	70	4	3	intergenic	CG5665
585	chr3L	20447540	20447662	chr3L	20454440	20454562	1360	2	3381	8	122	3-5	72.75	2	2.66667	5` UTR	Uhg8
586	chr3L	20500967	20501077	chr3L	20507867	20507977	springer	383	7147	23	110	8-15	64.57	0	23	intron	CG32425
587	chr3L	20729003	20729132	chr3L	20735903	20736032	gypsy	6987	7446	23	129	12-11	66.26	17	1.27778	intron	CG13252
588	chr3L	20759347	20759441	chr3L	20766247	20766341	Ivk	5360	9	15	94	3-12	67	11	1.25	intergenic	CG4074
589	chr3L	20905563	20905674	chr3L	20912463	20912574	gypsy	2	457	7	111	1-6	63.14	0	7	intergenic	CR43930
590	chr3L	21033129	21033239	chr3L	21040029	21040139	copia	253	4887	10	110	8-2	63.9	3	2.5	intergenic	not near genes
591	chr3L	21051205	21051313	chr3L	21058105	21058213	Burdock	6136	6367	6	108	2-4	62.17	8	0.666667	intergenic	siz
592	chr3L	21063312	21063436	chr3L	21070212	21070336	roo	410	8	25	124	10-15	68.28	15	1.5625	intron	siz
593	chr3L	21112504	21112630	chr3L	21119404	21119530	gypsy	6986	7442	20	126	14-6	69.9	12	1.53846	intron	ko
594	chr3L	21180484	21180612	chr3L	21187384	21187512	hopper	1	2	31	128	18-13	66.71	0	31	intron	CG42337
595	chr3L	21277880	21278003	chr3L	21284780	21284903	blood	3	372	26	123	15-11	70.92	12	2	intron	CG12974
596	chr3L	21278080	21278182	chr3L	21284980	21285082	mdg3	24	241	7	102	4-3	71.14	22	0.304348	intron	CG12974
597	chr3L	21365399	21365473	chr3L	21372299	21372373	springer	339	7150	11	74	4-7	71.18	20	0.52381	intergenic	not near genes
598	chr3L	21629517	21629646	chr3L	21636417	21636546	HMS-Beagle2	6884	310	39	129	17-22	68.18	0	39	intergenic	MED1
599	chr3L	21708993	21709115	chr3L	21715893	21716015	mdg3	238	5253	11	122	1-10	68.64	38	0.282051	intergenic	not near genes
600	chr3L	21963964	21964092	chr3L	21970864	21970992	Transpac	310	4923	15	128	8-7	68.93	15	0.9375	intergenic	CS-2
601	chr3L	21999911	22000368	chr3L	22006811	22007268	springer	350	371	17	457	9-8	62.59	64	0.261538	intergenic	not near genes
602	chr3L	22204581	22204653	chr3L	22211481	22211553	copia	231	4903	8	72	5-3	69	6	1.14286	intron	olf413
603	chr3L	22211520	22211650	chr3L	22218420	22218550	roo	8663	407	28	130	13-15	70.25	22	1.21739	intron	olf413
604	chr3L	22332539	22332649	chr3L	22339439	22339549	jockey	7	4982	17	110	8-9	65.94	3	4.25	intron	Ten-m
605	chr3L	22342336	22342550	chr3L	22349236	22349450	1360	3388	3341	19	214	15-4	69	40	0.463415	intron	Ten-m
606	chr3L	22394530	22394660	chr3L	22401430	22401560	springer	1	383	18	130	13-5	67.44	26	0.666667	intron	Ten-m
607	chr3L	22531575	22531650	chr3L	22538475	22538550	mdg3	5493	37	4	75	2-2	74.5	15	0.25	intergenic	not near genes
608	chr3L	22815379	22815500	chr3L	22822279	22822400	springer	7145	7518	23	121	12-11	67	14	1.53333	intron	jim
609	chr3L	22835800	22835926	chr3L	22842700	22842826	copia	257	6	11	126	8-3	72.09	5	1.83333	intergenic	not near genes
610	chr3L	22877095	22877206	chr3L	22883995	22884106	S-element	1709	1700	4	111	2-2	65.75	13	0.285714	intron	slif
611	chr3L	23111347	23111460	chr3L	23118247	23118360	roo	2	393	11	113	2-9	71.09	3	2.75	intergenic	not near genes
612	chr3L	23208594	23208709	chr3L	23215494	23215609	springer	7516	7149	16	115	7-9	68.5	13	1.14286	intron	nAcRalpha-80B
613	chr3L	23275567	23275667	chr3L	23282467	23282567	S-element	32	2	7	100	3-4	69.86	13	0.5	intron	nAcRalpha-80B
614	chr3L	23449352	23449426	chr3L	23456252	23456326	gtwin	7380	6963	12	74	10-2	62.75	17	0.666667	intergenic	not near genes
615	chr3L	23731556	23731662	chr3L	23738456	23738562	springer	23	53	10	106	1-9	69.7	31	0.3125	intron	CG17698
616	chr3L	23746164	23746281	chr3L	23753064	23753181	Stalker4	6969	408	15	117	8-7	62.4	19	0.75	intergenic	not near genes
617	chr3L	24508409	24508536	chr3L	24515309	24515436	pogo	2097	3	16	127	12-4	68.12	20	0.761905	intergenic	not near genes
618	chr3R	16605	16731	chr3R	4190883	4191009	pogo	4	2097	25	126	10-15	70.44	16	1.47059	intergenic	Dsk
619	chr3R	362538	362670	chr3R	4536816	4536948	gypsy	7448	6986	24	132	14-10	72.17	28	0.827586	intron	CG34357
620	chr3R	378997	379117	chr3R	4553275	4553395	Juan	53	31	6	120	1-5	68.17	3	1.5	intron	CG34357
621	chr3R	380004	380125	chr3R	4554282	4554403	Bari1	1704	11	13	121	9-4	67.77	10	1.18182	intron	CG34357
622	chr3R	390926	391045	chr3R	4565204	4565323	1360	17	3317	39	119	11-28	73.62	36	1.05405	intergenic	not near genes
623	chr3R	426501	426603	chr3R	4600779	4600881	gypsy	7443	24	15	102	7-8	67.27	6	2.14286	intergenic	not near genes
624	chr3R	443547	443675	chr3R	4617825	4617953	springer	7516	7136	15	128	7-8	69.87	9	1.5	intron	5-HT2
625	chr3R	504216	504347	chr3R	4678494	4678625	springer	7135	7518	15	131	10-5	66	19	0.75	intron	CG43427
626	chr3R	522659	522792	chr3R	4696937	4697070	copia	258	1	17	133	6-11	70.76	26	0.62963	intron	CG43427
627	chr3R	723873	724000	chr3R	4898151	4898278	roo	1	9069	34	127	18-16	69.44	33	1	intergenic	not near genes
628	chr3R	817644	817779	chr3R	4991922	4992057	mdg3	5254	252	24	135	12-12	68.33	23	1	intron	CG2022
629	chr3R	843829	843940	chr3R	5018107	5018218	gypsy	7427	6986	22	111	8-14	66.68	14	1.46667	intergenic	not near genes
630	chr3R	1012201	1012307	chr3R	5186479	5186585	I-element	5	5346	15	106	13-2	61.8	15	0.9375	intron	cno
631	chr3R	1012275	1012389	chr3R	5186553	5186667	springer	7157	7523	16	114	4-12	69.75	10	1.45455	intron	cno
632	chr3R	1036693	1036819	chr3R	5210971	5211097	copia	4871	253	13	126	11-2	68	17	0.722222	intron	cno
633	chr3R	1067416	1067547	chr3R	5241694	5241825	gypsy	3	464	25	131	13-12	69.28	11	2.08333	intron	CG12163
634	chr3R	1088152	1088270	chr3R	5262430	5262548	copia	4884	258	19	118	8-11	67.11	17	1.05556	intron	Tim17a2
635	chr3R	1109922	1110050	chr3R	5284200	5284328	roo	5	410	29	128	10-19	67.45	16	1.70588	intron	mtd
636	chr3R	1173516	1173643	chr3R	5347794	5347921	flea	256	4762	20	127	7-13	73.55	25	0.769231	intergenic	not near genes
637	chr3R	1344047	1344143	chr3R	5518325	5518421	Transpac	4955	310	12	96	6-6	70.08	12	0.923077	intron	Nmdar1
638	chr3R	1600627	1600755	chr3R	5774905	5775033	springer	7522	5	22	128	11-11	67.95	35	0.611111	intron	CG2082
639	chr3R	1626003	1626115	chr3R	5800281	5800393	mdg3	5265	5492	24	112	8-16	63.79	13	1.71429	intergenic	CG10979
640	chr3R	1838092	1838215	chr3R	6012370	6012493	springer	8	7520	12	123	7-5	70.33	17	0.666667	intergenic	CG10280
641	chr3R	1853003	1853081	chr3R	6027281	6027359	412	7545	52	12	78	6-6	67.75	11	1	intergenic	CG11459
642	chr3R	1914244	1914365	chr3R	6088522	6088643	transib2	6	2820	14	121	6-8	65.64	17	0.777778	intergenic	Gasp
643	chr3R	1924462	1924561	chr3R	6098740	6098839	springer	29	7518	20	99	7-13	65.7	11	1.66667	intron	Gasp
644	chr3R	2046266	2046328	chr3R	6220544	6220606	Doc	68	6	10	62	6-4	72.1	9	1	exon	Osi4
645	chr3R	2238762	2238841	chr3R	6413040	6413119	I-element	5313	1	10	79	4-6	69.1	13	0.714286	intron	gpp
646	chr3R	2285787	2285910	chr3R	6460065	6460188	412	7545	7	17	123	10-7	69.71	16	1	intergenic	Zif
647	chr3R	2516329	2516464	chr3R	6690607	6690742	flea	256	4754	16	135	2-14	76.69	19	0.8	intergenic	Ccp84Ag
648	chr3R	2587700	2587812	chr3R	6761978	6762090	springer	7525	7159	12	112	7-5	65.75	9	1.2	intergenic	bcd
649	chr3R	2800840	2800964	chr3R	6975118	6975242	mdg3	5255	242	8	124	7-1	71	16	0.470588	intron	Antp
650	chr3R	2933896	2934010	chr3R	7108174	7108288	copia	4874	244	16	114	9-7	71.5	15	1	intron	Alh
651	chr3R	2934408	2934527	chr3R	7108686	7108805	hobo	2937	7	18	119	6-12	64.56	27	0.642857	intron	Alh
652	chr3R	2967586	2967722	chr3R	7141864	7142000	diver	5887	229	35	136	20-15	68.51	23	1.45833	3` UTR	Fer1
653	chr3R	3318099	3318224	chr3R	7492377	7492502	1360	3388	3386	17	125	12-5	68.65	15	1.0625	intron	alpha-Est10
654	chr3R	3324791	3324910	chr3R	7499069	7499188	gypsy	6994	456	28	119	16-12	66.46	14	1.86667	intron	alpha-Est9
655	chr3R	3509680	3509815	chr3R	7683958	7684093	copia	4868	259	16	135	7-9	71	17	0.888889	intron	Nlg1
656	chr3R	3541379	3541511	chr3R	7715657	7715789	roo	8662	408	28	132	11-17	67.75	21	1.27273	intergenic	not near genes
657	chr3R	3599275	3599399	chr3R	7773553	7773677	gypsy	6988	455	27	124	16-11	67.93	20	1.28571	intergenic	CG11286
658	chr3R	3639247	3639369	chr3R	7813525	7813647	hopper	5	1411	9	122	5-4	67	10	0.818182	intergenic	CG31472
659	chr3R	3694560	3694668	chr3R	7868838	7868946	3S18	327	9	7	108	1-6	60.71	0	7	intron	CG17816
660	chr3R	3705321	3705433	chr3R	7879599	7879711	Stalker4	393	6957	12	112	7-5	67.17	13	0.857143	intron	CG17816
661	chr3R	3768952	3769060	chr3R	7943230	7943338	springer	7162	7522	23	108	13-10	65.65	12	1.76923	intron	dsx
662	chr3R	3888092	3888211	chr3R	8062370	8062489	copia	4865	240	19	119	14-5	65.47	18	1	intron	CG7918
663	chr3R	3894610	3894737	chr3R	8068888	8069015	HMS-Beagle	247	6802	21	127	11-10	67.95	19	1.05	intron	CG7918
664	chr3R	3896600	3896760	chr3R	8070878	8071038	297	395	1	14	160	10-4	70.14	4	2.8	intron	CG7918
665	chr3R	4484490	4484615	chr3R	8658768	8658893	S-element	3	6	11	125	6-5	69.09	20	0.52381	intron	bel
666	chr3R	4636868	4636986	chr3R	8811146	8811264	1360	3385	7	9	118	7-2	65.67	2	3	intergenic	CG9837
667	chr3R	4637882	4637990	chr3R	8812160	8812268	springer	7515	7155	11	108	4-7	69.18	3	2.75	intergenic	CG9837
668	chr3R	4639888	4639997	chr3R	8814166	8814275	springer	7152	376	8	109	5-3	67	10	0.727273	3` UTR	CG9821
669	chr3R	4645928	4646045	chr3R	8820206	8820323	gypsy	7001	7448	7	117	2-5	67.14	4	1.4	intron	CG9821
670	chr3R	4753926	4754035	chr3R	8928204	8928313	copia	1	235	15	109	10-5	67	14	1	intron	pyd
671	chr3R	4755314	4755407	chr3R	8929592	8929685	FB	8	26	11	93	7-4	62.27	3	2.75	intron	pyd
672	chr3R	4785377	4785510	chr3R	8959655	8959788	springer	7139	387	23	133	15-8	67.61	16	1.35294	intron	CG11966
673	chr3R	4850546	4850640	chr3R	9024824	9024918	pogo	19	2080	13	94	7-6	70.92	9	1.3	intron	neur
674	chr3R	4987333	4987437	chr3R	9161611	9161715	pogo	2	2073	14	104	12-2	64.43	6	2	intron	pum
675	chr3R	5110468	5110561	chr3R	9284746	9284839	jockey	4972	9	14	93	7-7	67.71	6	2	intergenic	not near genes
676	chr3R	5173337	5173426	chr3R	9347615	9347704	S-element	1686	1701	8	89	2-6	62.75	11	0.666667	intron	CG43674
677	chr3R	5304069	5304148	chr3R	9478347	9478426	mdg1	7038	7407	5	79	4-1	75.2	4	1	intron	CG16779
678	chr3R	5457534	5457662	chr3R	9631812	9631940	gypsy	7448	3	26	128	14-12	68.27	12	2	5` UTR	SpdS
679	chr3R	5640680	5640809	chr3R	9814958	9815087	diver	1	224	28	129	13-15	69.14	20	1.33333	exon	eloF
680	chr3R	5644408	5644527	chr3R	9818686	9818805	roo	8664	397	22	119	10-12	65.5	11	1.83333	intergenic	CG16904
681	chr3R	5655652	5655773	chr3R	9829930	9830051	roo	5	404	24	121	17-7	63.79	18	1.26316	intron	Teh1
682	chr3R	5716576	5716708	chr3R	9890854	9890986	412	1	495	20	132	7-13	69.9	21	0.909091	intron	Glut4EF
683	chr3R	5916033	5916155	chr3R	10090311	10090433	springer	5	7516	9	122	1-8	66.11	27	0.321429	intergenic	mir-317
684	chr3R	6107643	6107776	chr3R	10281921	10282054	copia	4867	256	15	133	11-4	68.47	27	0.535714	intron	CG43143
685	chr3R	6109819	6109951	chr3R	10284097	10284229	297	6974	6580	11	132	3-8	71.82	22	0.478261	intron	CG43143
686	chr3R	6113944	6114016	chr3R	10288222	10288294	gypsy	3	405	8	72	4-4	74.12	0	8	intron	CG43143
687	chr3R	6136584	6136665	chr3R	10310862	10310943	Juan	4183	9	9	81	2-7	68.56	9	0.9	intron	CG6293
688	chr3R	6221464	6221566	chr3R	10395742	10395844	412	488	7077	19	102	15-4	70.95	6	2.71429	intron	cwo
689	chr3R	6364500	6364622	chr3R	10538778	10538900	blood	7018	7387	20	122	9-11	65.6	17	1.11111	intron	hth
690	chr3R	6654348	6654447	chr3R	10828626	10828725	copia	4897	252	4	99	1-3	65.25	3	1	intron	Cad86C
691	chr3R	6776763	6776891	chr3R	10951041	10951169	mdg1	3	421	16	128	4-12	69.56	16	0.941176	exon	Tengl4
692	chr3R	6970967	6971096	chr3R	11145245	11145374	412	2	493	20	129	5-15	69.35	10	1.81818	intergenic	CheA86a
693	chr3R	6995377	6995510	chr3R	11169655	11169788	roo	8659	9069	15	133	10-5	65.4	30	0.483871	exon	Ugt35b
694	chr3R	7013331	7013460	chr3R	11187609	11187738	blood	377	7013	21	129	12-9	67.1	16	1.23529	intergenic	not near genes
695	chr3R	7016836	7016957	chr3R	11191114	11191235	hobo	5	2937	19	121	13-6	69	12	1.46154	intergenic	not near genes
696	chr3R	7524232	7524315	chr3R	11698510	11698593	springer	7503	7168	5	83	3-2	64.6	20	0.238095	intergenic	CG14717
697	chr3R	7553870	7553989	chr3R	11728148	11728267	mdg3	5266	248	6	119	3-3	69.17	2	2	intron	CG12594
698	chr3R	7693354	7693484	chr3R	11867632	11867762	roo	3	410	28	130	13-15	69.89	26	1.03704	intron	CG6959
699	chr3R	7737076	7737171	chr3R	11911354	11911449	roo	8689	399	11	95	5-6	68.45	9	1.1	intron	Cad87A
700	chr3R	7765418	7765536	chr3R	11939696	11939814	FB	3	6	24	118	13-11	69.38	19	1.2	intron	Cad87A
701	chr3R	7770931	7771044	chr3R	11945209	11945322	297	390	6596	11	113	6-5	69	21	0.5	intron	Cad87A
702	chr3R	8016069	8016153	chr3R	12190347	12190431	I-element	5155	5319	13	84	9-4	66.38	12	1	intergenic	CG4810
703	chr3R	8197367	8197491	chr3R	12371645	12371769	springer	7515	2	17	124	5-12	66.47	17	0.944444	intergenic	GstD1
704	chr3R	8337052	8337174	chr3R	12511330	12511452	Stalker2	7253	7647	7	122	2-5	68.43	4	1.4	3` UTR	Hsp70Bc
705	chr3R	8354676	8354800	chr3R	12528954	12529078	springer	5	381	17	124	15-2	67.71	10	1.54545	intron	Octbeta3R
706	chr3R	8398291	8398352	chr3R	12572569	12572630	jockey	68	6	11	61	3-8	72.55	9	1.1	intron	Octbeta2R
707	chr3R	8411233	8411350	chr3R	12585511	12585628	opus	15	498	6	117	1-5	68	2	2	intron	Octbeta2R
708	chr3R	8449396	8449527	chr3R	12623674	12623805	roo	8662	407	11	131	4-7	70.91	4	2.2	intergenic	Vha55
709	chr3R	8960986	8961122	chr3R	13135264	13135400	flea	257	4754	16	136	3-13	69.62	30	0.516129	intron	timeout
710	chr3R	9010879	9011008	chr3R	13185157	13185286	flea	255	4759	18	129	7-11	72.39	7	2.25	intergenic	CG8508
711	chr3R	9021026	9021153	chr3R	13195304	13195431	mdg3	5253	5495	4	127	3-1	72.25	7	0.5	intergenic	CG8141
712	chr3R	9044532	9044647	chr3R	13218810	13218925	copia	5	245	14	115	10-4	65.29	15	0.875	intergenic	CG8476
713	chr3R	9098196	9098310	chr3R	13272474	13272588	Tabor	475	6846	13	114	8-5	67.62	7	1.625	intergenic	Su(var)3-7
714	chr3R	9225703	9226041	chr3R	13399981	13400319	springer	7509	7513	13	338	1-12	71.54	32	0.393939	intron	CG9796
715	chr3R	9428094	9428208	chr3R	13602372	13602486	mdg1	7	7449	18	114	6-12	61.67	14	1.2	intergenic	not near genes
716	chr3R	9469559	9469653	chr3R	13643837	13643931	gypsy	7023	462	18	94	4-14	63.89	0	18	intron	sqd
717	chr3R	9663929	9664022	chr3R	13838207	13838300	pogo	14	2074	7	93	5-2	63.57	1	3.5	intergenic	Nsf2
718	chr3R	9773865	9773966	chr3R	13948143	13948244	Transpac	310	4950	12	101	7-5	68.75	8	1.33333	intergenic	Art6
719	chr3R	9801402	9801491	chr3R	13975680	13975769	pogo	20	2076	15	89	7-8	69	4	3	intron	rdx
720	chr3R	9875049	9875163	chr3R	14049327	14049441	transib2	11	2818	19	114	8-11	66.05	2	6.33333	intergenic	not near genes
721	chr3R	9880911	9881042	chr3R	14055189	14055320	roo	4	412	24	131	15-9	68.21	13	1.71429	intergenic	foxo
722	chr3R	10183381	10183513	chr3R	14357659	14357791	roo	8663	409	29	132	11-18	64.83	27	1.03571	intron	NK7.1
723	chr3R	10194528	10194658	chr3R	14368806	14368936	springer	7520	1	12	130	5-7	64.5	4	2.4	intron	NK7.1
724	chr3R	10207277	10207371	chr3R	14381555	14381649	blood	7044	7385	32	94	14-18	67.34	7	4	5` UTR	soti
725	chr3R	10209091	10209189	chr3R	14383369	14383467	copia	15	238	13	98	11-2	61.46	6	1.85714	intergenic	soti
726	chr3R	10275364	10275456	chr3R	14449642	14449734	I-element	5333	10	14	92	3-11	66.21	14	0.933333	intron	cv-c
727	chr3R	10278349	10278474	chr3R	14452627	14452752	diver	221	5892	22	125	6-16	68.32	1	11	intron	cv-c
728	chr3R	10607014	10607131	chr3R	14781292	14781409	springer	7508	7139	4	117	1-3	72.75	11	0.333333	intron	jvl
729	chr3R	10630335	10630461	chr3R	14804613	14804739	gypsy	463	6994	17	126	9-8	65.24	25	0.653846	3` UTR	btsz
730	chr3R	10804381	10804503	chr3R	14978659	14978781	gypsy	7447	6995	30	122	15-15	68.13	23	1.25	intergenic	not near genes
731	chr3R	10953716	10953833	chr3R	15127994	15128111	springer	16	7523	5	117	3-2	66.2	4	1	intron	CG42788
732	chr3R	10983297	10983388	chr3R	15157575	15157666	invader3	5194	5431	11	91	5-6	69.45	3	2.75	intron	Gyc88E
733	chr3R	10984120	10984197	chr3R	15158398	15158475	Stalker	6854	7209	14	77	8-6	69.21	0	14	intron	Gyc88E
734	chr3R	10984131	10984244	chr3R	15158409	15158522	Stalker4	16	407	24	113	5-19	62.33	1	12	intron	Gyc88E
735	chr3R	11023760	11023882	chr3R	15198038	15198160	gypsy	7438	6986	17	122	9-8	64.88	13	1.21429	intron	CG42542
736	chr3R	11057701	11057830	chr3R	15231979	15232108	pogo	2098	2	25	129	14-11	68.8	20	1.19048	intergenic	Art3
737	chr3R	11069085	11069206	chr3R	15243363	15243484	copia	3	249	12	121	9-3	71.17	2	4	intron	Hsc70-4
738	chr3R	11069948	11070081	chr3R	15244226	15244359	springer	7522	7137	19	133	8-11	65.84	7	2.375	intron	Hsc70-4
739	chr3R	11118591	11118728	chr3R	15292869	15293006	copia	259	4866	10	137	5-5	63.5	7	1.25	intron	Tm1
740	chr3R	11536979	11537103	chr3R	15711257	15711381	297	6	6973	7	124	3-4	67	1	3.5	intergenic	CG5404
741	chr3R	11615774	11615834	chr3R	15790052	15790112	flea	4757	4697	36	60	24-12	69.67	22	1.56522	exon	c(3)G
742	chr3R	11632816	11632936	chr3R	15807094	15807214	FB	4	3	19	120	10-9	68.21	13	1.35714	intron	alpha-Man-IIb
743	chr3R	11823275	11823391	chr3R	15997553	15997669	copia	245	4873	11	116	5-6	61.36	1	5.5	intron	srp
744	chr3R	12172875	12173001	chr3R	16347153	16347279	mdg3	5253	5494	12	126	11-1	66.75	17	0.666667	exon	CG14879
745	chr3R	12174909	12175026	chr3R	16349187	16349304	P-element	2884	8	27	117	13-14	50.33	26	1	5` UTR	CG14879
746	chr3R	12366707	12366814	chr3R	16540985	16541092	gypsy	7008	7445	20	107	9-11	68	21	0.909091	intron	CG42342
747	chr3R	12382207	12382340	chr3R	16556485	16556618	gypsy	461	6987	17	133	8-9	70.12	21	0.772727	intron	CG42342
748	chr3R	12842844	12842943	chr3R	17017122	17017221	1360	3376	3233	21	99	8-13	59.57	2	7	intron	Pxd
749	chr3R	13068821	13068945	chr3R	17243099	17243223	hopper	1412	5	17	124	10-7	66.82	18	0.894737	intron	beat-IIb
750	chr3R	13097655	13097784	chr3R	17271933	17272062	hopper	1414	1414	24	129	13-11	65.54	18	1.26316	intergenic	not near genes
751	chr3R	13112393	13112517	chr3R	17286671	17286795	roo	405	3	21	124	10-11	67.95	5	3.5	3` UTR	CR43489
752	chr3R	13220162	13220292	chr3R	17394440	17394570	gypsy	6989	462	24	130	15-9	70.38	0	24	intron	CREG
753	chr3R	13249192	13249329	chr3R	17423470	17423607	roo	411	8660	24	137	12-12	70.83	20	1.14286	intergenic	CG42835
754	chr3R	13312041	13312169	chr3R	17486319	17486447	Bari1	1705	6	18	128	8-10	68.89	22	0.782609	intron	Dscam3
755	chr3R	13316790	13316891	chr3R	17491068	17491169	gypsy	7424	6993	15	101	6-9	65.27	10	1.36364	intron	Dscam3
756	chr3R	13539618	13539736	chr3R	17713896	17714014	FB	8	1	13	118	6-7	69.69	25	0.5	intron	osa
757	chr3R	13558953	13559039	chr3R	17733231	17733317	INE-1	564	471	8	86	7-1	75.38	1	4	intergenic	Lgr1
758	chr3R	13791047	13791171	chr3R	17965325	17965449	gypsy	7443	6989	23	124	11-12	65.13	20	1.09524	intron	cpo
759	chr3R	14145722	14145827	chr3R	18320000	18320105	412	15	7535	25	105	13-12	65.48	19	1.25	intron	CG31235
760	chr3R	14202995	14203344	chr3R	18377273	18377622	INE-1	134	90	5	349	4-1	77.4	42	0.116279	intergenic	CG7675
761	chr3R	14271498	14271607	chr3R	18445776	18445885	springer	7510	7149	17	109	5-12	65.18	12	1.30769	intron	fru
762	chr3R	14302136	14302268	chr3R	18476414	18476546	roo	409	8664	25	132	10-15	67	24	1	intron	fru
763	chr3R	14304756	14304840	chr3R	18479034	18479118	gypsy	7006	7418	5	84	3-2	62.4	0	5	intron	fru
764	chr3R	14444744	14444874	chr3R	18619022	18619152	roo	408	1	30	130	15-15	69.23	1	15	intron	qin
765	chr3R	14651182	14651262	chr3R	18825460	18825540	Rt1a	335	5022	4	80	1-3	60	10	0.363636	intron	CG18208
766	chr3R	14886103	14886227	chr3R	19060381	19060505	gypsy	6985	452	12	124	7-5	71.17	2	4	intron	cdi
767	chr3R	14886104	14886236	chr3R	19060382	19060514	springer	7138	7522	15	132	10-5	67	3	3.75	intron	cdi
768	chr3R	14907668	14907783	chr3R	19081946	19082061	blood	375	10	24	115	15-9	67.88	0	24	intron	cdi
769	chr3R	15007649	15007781	chr3R	19181927	19182059	roo	411	8665	19	132	13-6	70.95	30	0.612903	intron	CG31475
770	chr3R	15028488	15028631	chr3R	19202766	19202909	mdg3	251	5253	14	143	7-7	55.93	0	14	intergenic	CG31475
771	chr3R	15046947	15047042	chr3R	19221225	19221320	jockey	4757	4983	11	95	9-2	60.55	15	0.6875	intron	vib
772	chr3R	15066883	15066996	chr3R	19241161	19241274	FB	5	9	22	113	12-10	65.27	0	22	intron	unc79
773	chr3R	15279304	15279406	chr3R	19453582	19453684	Max-element	299	27	20	102	10-10	66.4	18	1.05263	intron	CG31221
774	chr3R	15403387	15403519	chr3R	19577665	19577797	roo	8664	410	55	132	31-24	69.4	7	6.875	intron	Dys
775	chr3R	15513217	15513344	chr3R	19687495	19687622	springer	381	2	21	127	9-12	69.71	14	1.4	intron	Naam
776	chr3R	15513250	15513349	chr3R	19687528	19687627	gypsy6	349	7416	4	99	1-3	75.25	12	0.307692	intron	Naam
777	chr3R	15774843	15774940	chr3R	19949121	19949218	copia	4903	256	7	97	4-3	69.29	1	3.5	intron	Hs6st
778	chr3R	15790345	15790432	chr3R	19964623	19964710	copia	4868	211	8	87	6-2	66.62	7	1	intron	Hs6st
779	chr3R	16086835	16087133	chr3R	20261113	20261411	gypsy	6995	7442	50	298	27-23	69.5	74	0.666667	intron	cic
780	chr3R	16105245	16105373	chr3R	20279523	20279651	gypsy	459	1	13	128	4-9	67.15	18	0.684211	intron	cic
781	chr3R	16158220	16158294	chr3R	20332498	20332572	mdg1	7041	367	5	74	3-2	74.6	6	0.714286	intergenic	Sirt2
782	chr3R	16220275	16220345	chr3R	20394553	20394623	roo	398	8714	19	70	17-2	65.68	6	2.71429	intron	mun
783	chr3R	16299934	16300062	chr3R	20474212	20474340	springer	7522	7142	17	128	10-7	69.53	19	0.85	intron	mun
784	chr3R	16317436	16317518	chr3R	20491714	20491796	flea	4965	4757	16	82	5-11	70.62	2	5.33333	intergenic	not near genes
785	chr3R	16331850	16331950	chr3R	20506128	20506228	Quasimodo	1	7336	8	100	6-2	72.62	0	8	exon	Or92a
786	chr3R	16342178	16342309	chr3R	20516456	20516587	HMS-Beagle	245	6795	15	131	10-5	70.73	10	1.36364	intergenic	not near genes
787	chr3R	16371794	16371907	chr3R	20546072	20546185	springer	7154	382	18	113	13-5	69.33	17	1	intron	Stat92E
788	chr3R	16477755	16477875	chr3R	20652033	20652153	gypsy	9	7442	15	120	10-5	64	18	0.789474	exon	KaiRIA
789	chr3R	16511814	16511938	chr3R	20686092	20686216	roo	406	8668	29	124	8-21	67.34	15	1.8125	intergenic	Oamb
790	chr3R	16670752	16670862	chr3R	20845030	20845140	17.6	6940	7410	9	110	3-6	75.44	0	9	intergenic	CG15695
791	chr3R	16689922	16690048	chr3R	20864200	20864326	roo	407	8666	28	126	14-14	72.14	16	1.64706	intron	CG3822
792	chr3R	16748129	16748260	chr3R	20922407	20922538	opus	499	2	23	131	14-9	71.7	27	0.821429	intron	CG31191
793	chr3R	17001631	17001754	chr3R	21175909	21176032	FB	1	3	21	123	12-9	67.48	18	1.10526	intron	SNF4Agamma
794	chr3R	17122162	17122282	chr3R	21296440	21296560	gypsy	3	453	30	120	15-15	64.97	3	7.5	5` UTR	Hsromega
795	chr3R	17122748	17122854	chr3R	21297026	21297132	gypsy6	7419	7778	4	106	1-3	61.25	0	4	5` UTR	Hsromega
796	chr3R	17122757	17122881	chr3R	21297035	21297159	springer	9	7522	29	124	11-18	67.97	2	9.66667	5` UTR	Hsromega
797	chr3R	17161964	17162095	chr3R	21336242	21336373	roo	8662	9070	22	131	10-12	68.23	22	0.956522	intron	CG16791
798	chr3R	17177572	17177693	chr3R	21351850	21351971	springer	377	7140	7	121	4-3	70	17	0.388889	intergenic	CG16791
799	chr3R	17241015	17241139	chr3R	21415293	21415417	mdg3	248	5261	5	124	2-3	71.4	23	0.208333	intron	lbl
800	chr3R	17355680	17355810	chr3R	21529958	21530088	springer	7522	7140	20	130	9-11	65.55	15	1.25	intergenic	CG7956
801	chr3R	17370778	17370894	chr3R	21545056	21545172	copia	240	4868	9	116	4-5	70.89	0	9	intergenic	not near genes
802	chr3R	17424945	17425075	chr3R	21599223	21599353	roo	407	8663	24	130	13-11	69.04	14	1.6	intron	InR
803	chr3R	17444593	17444713	chr3R	21618871	21618991	springer	13	7522	17	120	11-6	65.29	15	1.0625	5` UTR	InR
804	chr3R	17485163	17485272	chr3R	21659441	21659550	Juan	3741	4205	7	109	4-3	66.29	6	1	intron	E2f
805	chr3R	17814358	17814490	chr3R	21988636	21988768	flea	5012	4754	22	132	7-15	70.64	6	3.14286	intron	Eip93F
806	chr3R	17920824	17920905	chr3R	22095102	22095183	roo	50	409	16	81	7-9	73	1	8	intron	CG5778
807	chr3R	18031753	18031857	chr3R	22206031	22206135	pogo	2081	15	14	104	6-8	64.29	1	7	intron	SKIP
808	chr3R	18438443	18438545	chr3R	22612721	22612823	pogo	2074	5	18	102	10-8	65.56	22	0.782609	exon	CG31156
809	chr3R	18449752	18449870	chr3R	22624030	22624148	flea	5011	4767	9	118	5-4	66.67	0	9	intron	loco
810	chr3R	18577695	18577817	chr3R	22751973	22752095	gypsy	6985	450	18	122	12-6	67.83	18	0.947368	intron	CG7023
811	chr3R	18605744	18605871	chr3R	22780022	22780149	springer	7143	7521	10	127	7-3	74.3	6	1.42857	intron	CG7029
812	chr3R	18690198	18690302	chr3R	22864476	22864580	jockey	4987	4668	20	104	7-13	64.35	15	1.25	intergenic	not near genes
813	chr3R	18730079	18730204	chr3R	22904357	22904482	hobo	6	2708	22	125	12-10	68.73	16	1.29412	intron	klg
814	chr3R	18735543	18735663	chr3R	22909821	22909941	mdg1	420	7048	12	120	11-1	67.75	6	1.71429	intron	klg
815	chr3R	18962977	18963080	chr3R	23137255	23137358	I-element	5336	2	10	103	3-7	68.7	24	0.4	intron	hh
816	chr3R	18987626	18987735	chr3R	23161904	23162013	412	487	7069	20	109	13-7	66.3	12	1.53846	intergenic	VhaAC39-2
817	chr3R	19004521	19004645	chr3R	23178799	23178923	roo	403	1	20	124	7-13	69.55	14	1.33333	intron	Ir
818	chr3R	19099491	19099594	chr3R	23273769	23273872	roo	8669	9050	25	103	15-10	67.76	13	1.78571	intron	orb
819	chr3R	19116301	19116396	chr3R	23290579	23290674	jockey	9	4986	17	95	12-5	53.59	13	1.21429	3` UTR	pnt
820	chr3R	19242731	19242855	chr3R	23417009	23417133	gypsy	6989	456	29	124	10-19	65.28	16	1.70588	intron	CG4374
821	chr3R	19258540	19258662	chr3R	23432818	23432940	roo	8675	411	20	122	7-13	70.15	15	1.25	intron	CG4374
822	chr3R	19406159	19406253	chr3R	23580437	23580531	jockey	4560	4972	24	94	16-8	62.12	11	2	intergenic	beat-IV
823	chr3R	19427403	19427499	chr3R	23601681	23601777	jockey	4988	4684	15	96	4-11	62.6	7	1.875	intergenic	CG10183
824	chr3R	19481639	19481731	chr3R	23655917	23656009	copia	252	4904	5	92	2-3	69.8	7	0.625	intron	CG31145
825	chr3R	19693678	19693807	chr3R	23867956	23868085	copia	256	4869	7	129	2-5	61.86	17	0.388889	intron	Pli
826	chr3R	19695448	19695565	chr3R	23869726	23869843	springer	7151	7520	25	117	11-14	62.04	16	1.47059	intron	Pli
827	chr3R	19731496	19731600	chr3R	23905774	23905878	pogo	2076	5	13	104	4-9	61.54	3	3.25	intron	sba
828	chr3R	19732187	19732258	chr3R	23906465	23906536	roo	8667	9015	12	71	7-5	67.33	3	3	intron	sba
829	chr3R	19846741	19846857	chr3R	24021019	24021135	mdg1	7053	7459	15	116	1-14	69.6	33	0.441176	intron	KrT95D
830	chr3R	19924423	19924522	chr3R	24098701	24098800	gypsy	436	7	19	99	5-14	70.37	9	1.9	intron	4EHP
831	chr3R	20095065	20095175	chr3R	24269343	24269453	copia	243	4877	6	110	3-3	63.17	18	0.315789	intergenic	not near genes
832	chr3R	20252552	20252681	chr3R	24426830	24426959	roo	8671	414	24	129	13-11	65.04	25	0.923077	intron	nAcRalpha-96Aa
833	chr3R	20279565	20279692	chr3R	24453843	24453970	gypsy	7	464	15	127	3-12	65.6	13	1.07143	intron	nAcRalpha-96Aa
834	chr3R	20392201	20392316	chr3R	24566479	24566594	3S18	17	342	14	115	9-5	66.43	5	2.33333	intron	CG13624
835	chr3R	21018691	21018816	chr3R	25192969	25193094	mdg3	5258	5498	14	125	6-8	69.93	19	0.7	intron	lobo
836	chr3R	21140300	21140431	chr3R	25314578	25314709	flea	4758	256	27	131	21-6	71.89	6	3.85714	3` UTR	CG10559
837	chr3R	21379803	21379932	chr3R	25554081	25554210	gypsy	7448	2	19	129	11-8	69.37	25	0.730769	intron	msi
838	chr3R	21562160	21562288	chr3R	25736438	25736566	HMS-Beagle	248	6	54	128	25-29	69	3	13.5	intron	LpR2
839	chr3R	21832987	21833113	chr3R	26007265	26007391	gypsy	457	1	32	126	20-12	64.78	14	2.13333	intergenic	E(spl)mbeta-HLH
840	chr3R	21845250	21845365	chr3R	26019528	26019643	springer	7522	7155	16	115	6-10	66.69	13	1.14286	intergenic	E(spl)m2-BFM
841	chr3R	21845710	21845842	chr3R	26019988	26020120	springer	7524	2	22	132	9-13	64.73	5	3.66667	intergenic	E(spl)m2-BFM
842	chr3R	22060119	22060241	chr3R	26234397	26234519	springer	7148	7522	21	122	13-8	68.86	6	3	intergenic	CG12290
843	chr3R	22063198	22063280	chr3R	26237476	26237558	springer	16	350	9	82	8-1	67.22	5	1.5	intron	CR42745
844	chr3R	22447772	22447891	chr3R	26622050	26622169	412	4	485	26	119	12-14	63.12	0	26	intergenic	TwdlM
845	chr3R	22471923	22472046	chr3R	26646201	26646324	gypsy	6	459	17	123	6-11	70.71	0	17	intergenic	beat-VII
846	chr3R	22472353	22472489	chr3R	26646631	26646767	mdg3	5253	249	15	136	11-4	62.53	0	15	intergenic	beat-VII
847	chr3R	22680156	22680277	chr3R	26854434	26854555	flea	251	4763	16	121	5-11	70.56	1	8	intron	Lerp
848	chr3R	22775632	22775741	chr3R	26949910	26950019	diver	5887	202	9	109	6-3	63.22	1	4.5	3` UTR	CG6330
849	chr3R	22794076	22794172	chr3R	26968354	26968450	FB	1	29	11	96	7-4	68.45	1	5.5	intron	CG5521
850	chr3R	22909259	22909321	chr3R	27083537	27083599	Juan	3852	3790	18	62	7-11	66.06	0	18	exon	Cpr97Ea
851	chr3R	22975341	22975446	chr3R	27149619	27149724	copia	237	4876	13	105	2-11	67	22	0.565217	intron	CG6051
852	chr3R	23096379	23096479	chr3R	27270657	27270757	springer	353	7138	14	100	4-10	69.5	19	0.7	intron	l(3)mbt
853	chr3R	23402753	23402880	chr3R	27577031	27577158	gypsy	6988	458	21	127	15-6	70.71	19	1.05	intron	wdb
854	chr3R	23964312	23964448	chr3R	28138590	28138726	blood	381	7010	48	136	33-15	68.69	2	16	intergenic	not near genes
855	chr3R	23966008	23966140	chr3R	28140286	28140418	Transpac	4919	310	40	132	24-16	69.03	4	8	intergenic	not near genes
856	chr3R	24086084	24086177	chr3R	28260362	28260455	copia	35	253	4	93	2-2	76.5	23	0.166667	intergenic	CG43125
857	chr3R	24091214	24091324	chr3R	28265492	28265602	springer	373	7148	12	110	2-10	62	1	6	intergenic	CG43125
858	chr3R	24156692	24156817	chr3R	28330970	28331095	springer	7145	7522	28	125	15-13	69.5	19	1.4	intron	larp
859	chr3R	24260747	24260856	chr3R	28435025	28435134	mdg1	400	7038	23	109	15-8	70.57	0	23	intron	beat-VI
860	chr3R	24457044	24457164	chr3R	28631322	28631442	FB	4	3	35	120	18-17	68.54	7	4.375	intron	CG10011
861	chr3R	24737473	24737601	chr3R	28911751	28911879	springer	7524	7144	22	128	10-12	69.05	20	1.04762	intron	Doa
862	chr3R	24858021	24858151	chr3R	29032299	29032429	Transpac	309	1	39	130	29-10	68.26	0	39	exon	Ssl2
863	chr3R	24953564	24953698	chr3R	29127842	29127976	opus	499	7115	27	134	17-10	67.37	2	9	exon	CG11880
864	chr3R	25040611	25040731	chr3R	29214889	29215009	springer	7522	7150	20	120	8-12	72.45	26	0.740741	5` UTR	CR31044
865	chr3R	25080009	25080136	chr3R	29254287	29254414	blood	7388	3	30	127	13-17	67.2	20	1.42857	intron	stg
866	chr3R	25086163	25086295	chr3R	29260441	29260573	gypsy	463	1	27	132	22-5	66.89	18	1.42105	intergenic	not near genes
867	chr3R	25104928	25104997	chr3R	29279206	29279275	I-element	5307	3	10	69	6-4	67.5	11	0.833333	intergenic	not near genes
868	chr3R	25112885	25113013	chr3R	29287163	29287291	springer	7140	7520	24	128	14-10	71.75	17	1.33333	intergenic	not near genes
869	chr3R	25152188	25152313	chr3R	29326466	29326591	Transpac	4921	305	39	125	23-16	70.46	0	39	intergenic	not near genes
870	chr3R	25187549	25187641	chr3R	29361827	29361919	mdg1	387	7042	13	92	11-2	65.08	0	13	intergenic	not near genes
871	chr3R	25214701	25214808	chr3R	29388979	29389086	297	23	6973	9	107	1-8	69.67	2	3	intron	Ptp99A
872	chr3R	25267408	25267536	chr3R	29441686	29441814	springer	5	385	23	128	10-13	69.3	4	4.6	intron	Ptp99A
873	chr3R	25267411	25267543	chr3R	29441689	29441821	gypsy	460	6985	20	132	7-13	67.75	11	1.66667	intron	Ptp99A
874	chr3R	25591838	25591964	chr3R	29766116	29766242	gypsy	460	4	33	126	16-17	68.12	21	1.5	intergenic	kay
875	chr3R	25596655	25596782	chr3R	29770933	29771060	springer	7140	7523	18	127	9-9	64.33	1	9	intron	kay
876	chr3R	25645176	25645310	chr3R	29819454	29819588	roo	412	8664	50	134	30-20	66.54	6	7.14286	intron	neo
877	chr3R	25646344	25646468	chr3R	29820622	29820746	412	495	9	49	124	29-20	67.53	1	24.5	intron	neo
878	chr3R	25646576	25646683	chr3R	29820854	29820961	gypsy	13	7439	22	107	4-18	63	0	22	intron	neo
879	chr3R	25656869	25656997	chr3R	29831147	29831275	springer	7522	7142	25	128	15-10	66.68	26	0.925926	intron	CG31033
880	chr3R	25671572	25671687	chr3R	29845850	29845965	Juan	4046	4210	22	115	11-11	66.91	2	7.33333	intron	Cad99C
881	chr3R	25693639	25693763	chr3R	29867917	29868041	S-element	1715	1707	11	124	6-5	69.45	0	11	intergenic	CG7816
882	chr3R	25754682	25754817	chr3R	29928960	29929095	3S18	345	1	33	135	14-19	67.58	6	4.71429	exon	CG31202
883	chr3R	25981472	25981608	chr3R	30155750	30155886	Doc3-element	173	174	5	136	3-2	66.2	1	2.5	exon	CG11498
884	chr3R	26081612	26081721	chr3R	30255890	30255999	springer	15	376	26	109	11-15	67.77	16	1.52941	intergenic	CG18404
885	chr3R	26102559	26102694	chr3R	30276837	30276972	gypsy	6984	462	46	135	24-22	68.78	9	4.6	intergenic	hdc
886	chr3R	26108892	26108966	chr3R	30283170	30283244	I-element	4	5313	8	74	6-2	61.12	6	1.14286	intron	hdc
887	chr3R	26169722	26169831	chr3R	30344000	30344109	springer	7500	7139	10	109	1-9	62	1	5	intron	hdc
888	chr3R	26183854	26183986	chr3R	30358132	30358264	roo	8664	410	38	132	13-25	68.13	0	38	intron	hdc
889	chr3R	26495322	26495445	chr3R	30669600	30669723	springer	7146	7521	20	123	9-11	69.3	25	0.769231	intergenic	not near genes
890	chr3R	26713168	26713291	chr3R	30887446	30887569	springer	7515	3	20	123	9-11	68.75	15	1.25	intron	Sap-r
891	chr3R	26833671	26833797	chr3R	31007949	31008075	412	7544	3	42	126	20-22	64.26	0	42	intron	5-HT7
892	chr3R	27437598	27437739	chr3R	31611876	31612017	gypsy9	5308	5311	4	141	2-2	71.75	0	4	intron	Med
893	chr3R	27528128	27528270	chr3R	31702406	31702548	gypsy	1	463	25	142	13-12	67.96	8	2.77778	intergenic	not near genes
894	chr3R	27571377	27571511	chr3R	31745655	31745789	copia	4868	258	12	134	7-5	67.67	34	0.342857	intron	awd
895	chr3R	27672256	27672382	chr3R	31846534	31846660	opus	4	496	12	126	4-8	65.5	3	3	intergenic	RhoGAP100F
896	chr3R	27685748	27685876	chr3R	31860026	31860154	roo	403	8662	48	128	27-21	68.69	2	16	intron	heph
897	chr3R	27790606	27790723	chr3R	31964884	31965001	gypsy	462	15	23	117	14-9	66.7	17	1.27778	intron	heph
898	chr4	78981	79205	chr4	58355	58579	springer	7506	7518	21	224	3-18	69	5	3.5	intron	CR43957
899	chr4	80686	80817	chr4	60060	60191	gypsy	462	1	10	131	9-1	64.9	10	0.909091	5` UTR	CR43957
900	chr4	91710	91832	chr4	71084	71206	springer	7510	7136	12	122	4-8	70.08	9	1.2	intron	pan
901	chr4	331806	332242	chr4	311180	311616	1360	2	3388	27	436	18-9	74.11	63	0.421875	3` UTR	CG2177
902	chr4	486945	487056	chr4	466319	466430	springer	372	7146	23	111	9-14	67.26	15	1.4375	intron	bip2
903	chr4	486961	487065	chr4	466335	466439	gypsy6	357	7419	4	104	3-1	62.5	13	0.285714	intron	bip2
904	chr4	524554	524680	chr4	503928	504054	mdg3	5257	5498	12	126	8-4	69	10	1.09091	5` UTR	zfh2
905	chr4	575470	575598	chr4	554844	554972	gypsy	7445	6987	30	128	12-18	72.63	17	1.66667	intron	Thd1
906	chr4	575967	576071	chr4	555341	555445	springer	7520	7164	25	104	11-14	68.32	14	1.66667	intron	Thd1
907	chr4	592673	592801	chr4	572047	572175	springer	7524	7144	22	128	11-11	70.14	12	1.69231	intron	Ephrin
908	chr4	631637	631739	chr4	611011	611113	springer	27	7518	22	102	7-15	66.27	12	1.69231	intron	Eph
909	chr4	780179	780304	chr4	759553	759678	springer	7	7521	26	125	8-18	68.96	14	1.73333	exon	bt
910	chr4	916626	916713	chr4	896000	896087	S-element	1	1670	6	87	5-1	64.17	11	0.5	intron	unc-13
911	chr4	988731	988846	chr4	968105	968220	1360	9	5	12	115	3-9	69.25	11	1	intron	CORL
912	chrX	272201	272329	chrX	378168	378296	gypsy	6989	460	19	128	9-10	64.79	22	0.826087	intergenic	not near genes
913	chrX	442415	442514	chrX	548382	548481	gypsy	462	7020	13	99	7-6	70.54	21	0.590909	intron	Appl
914	chrX	531138	531264	chrX	637105	637231	springer	7142	7520	19	126	12-7	66.16	33	0.558824	intron	su(s)
915	chrX	585415	585535	chrX	691382	691502	FB	5	2	40	120	16-24	63.35	1	20	intron	sdk
916	chrX	646612	646736	chrX	752579	752703	roo	400	8662	52	124	26-26	67.6	5	8.66667	exon	CG13361
917	chrX	985132	985251	chrX	1091099	1091218	gypsy	453	6991	35	119	18-17	69.26	19	1.75	intron	CG3655
918	chrX	1149164	1149297	chrX	1255131	1255264	gypsy	463	6987	22	133	6-16	67.68	20	1.04762	intron	Atf3
919	chrX	1875599	1875723	chrX	1981566	1981690	roo	8663	412	59	124	31-28	67.9	8	6.55556	intron	Hr4
920	chrX	1907599	1907722	chrX	2013566	2013689	FB	3	1	38	123	19-19	65	2	12.6667	intron	east
921	chrX	2182929	2183053	chrX	2288896	2289020	gypsy	458	6991	7	124	4-3	65.71	9	0.7	intron	CG2865
922	chrX	2229182	2229311	chrX	2335149	2335278	springer	383	7139	17	129	6-11	67.35	13	1.21429	intron	phl
923	chrX	2408781	2408901	chrX	2514748	2514868	copia	12	257	7	120	4-3	64.29	10	0.636364	intron	trol
924	chrX	2461798	2461929	chrX	2567765	2567896	roo	410	8665	47	131	23-24	67.64	0	47	intergenic	not near genes
925	chrX	2675228	2675352	chrX	2781195	2781319	FB	1	2	39	124	19-20	67.97	0	39	intron	kirre
926	chrX	2998150	2998268	chrX	3104117	3104235	flea	5003	4759	12	118	2-10	67	11	1	intron	kirre
927	chrX	3047326	3047455	chrX	3153293	3153422	springer	3	7521	14	129	10-4	69.71	20	0.666667	intron	N
928	chrX	3091012	3091139	chrX	3196979	3197106	flea	4762	256	13	127	9-4	73.15	16	0.764706	intron	dnc
929	chrX	3153614	3153744	chrX	3259581	3259711	gypsy	463	6988	18	130	6-12	68.22	0	18	intron	dnc
930	chrX	3252965	3253059	chrX	3358932	3359026	flea	4975	4755	40	94	12-28	73.5	7	5	intergenic	not near genes
931	chrX	3259397	3259513	chrX	3365364	3365480	springer	7504	7136	23	116	6-17	69.43	15	1.4375	intergenic	not near genes
932	chrX	3308170	3308296	chrX	3414137	3414263	springer	374	7135	11	126	6-5	71.64	1	5.5	intron	CG12535
933	chrX	3326860	3326969	chrX	3432827	3432936	gypsy	457	7002	20	109	9-11	64.3	0	20	intron	CG12535
934	chrX	3545183	3545314	chrX	3651150	3651281	roo	410	1	36	131	20-16	70.28	0	36	intron	AlstR
935	chrX	3644078	3644204	chrX	3750045	3750171	springer	7144	7522	22	126	10-12	70.05	26	0.814815	intron	tlk
936	chrX	3662967	3663092	chrX	3768934	3769059	FB	1	1	31	125	13-18	66.23	2	10.3333	intron	tlk
937	chrX	3737928	3738029	chrX	3843895	3843996	springer	7166	381	13	101	3-10	67.92	6	1.85714	intron	ec
938	chrX	4000998	4001118	chrX	4106965	4107085	springer	7511	7525	21	120	12-9	70.05	29	0.7	intron	cib
939	chrX	4068150	4068268	chrX	4174117	4174235	blood	15	379	26	118	11-15	66.35	26	0.962963	intron	Fas2
940	chrX	4080637	4080767	chrX	4186604	4186734	springer	7149	7519	44	130	22-22	71.55	5	7.33333	intron	Fas2
941	chrX	4117288	4117399	chrX	4223255	4223366	roo	8663	388	35	111	20-15	70.8	0	35	3` UTR	CG15570
942	chrX	4536311	4536435	chrX	4642278	4642402	mdg3	5494	5255	7	124	3-4	65.57	26	0.259259	exon	CG3062
943	chrX	4700732	4700861	chrX	4806699	4806828	412	494	3	44	129	24-20	66.7	1	22	intergenic	CG2861
944	chrX	4928918	4929037	chrX	5034885	5035004	gypsy	450	1	20	119	9-11	65.5	19	1	intergenic	not near genes
945	chrX	4937532	4937666	chrX	5043499	5043633	flea	4755	256	34	134	21-13	72.12	8	3.77778	intergenic	not near genes
946	chrX	5103155	5103276	chrX	5209122	5209243	copia	1	247	20	121	15-5	68.9	1	10	intron	rg
947	chrX	5254354	5254486	chrX	5360321	5360453	springer	7522	1	25	132	13-12	71.56	22	1.08696	intron	SK
948	chrX	5339841	5339920	chrX	5445808	5445887	roo	355	8663	27	79	13-14	72.48	6	3.85714	intergenic	SPR
949	chrX	5392909	5393016	chrX	5498876	5498983	412	7074	7543	36	107	13-23	66.39	0	36	intergenic	CG3239
950	chrX	5665053	5665170	chrX	5771020	5771137	copia	243	4870	15	117	7-8	64.13	26	0.555556	intron	CG42699
951	chrX	5678382	5678517	chrX	5784349	5784484	roo	8661	410	35	135	14-21	72.31	9	3.5	intron	CG42699
952	chrX	5724182	5724310	chrX	5830149	5830277	297	392	2	17	128	13-4	71	4	3.4	intron	CG15765
953	chrX	5791110	5791231	chrX	5897077	5897198	copia	4875	256	11	121	5-6	66.82	3	2.75	intergenic	not near genes
954	chrX	5795305	5795425	chrX	5901272	5901392	springer	9	7518	19	120	11-8	67.74	18	1	intron	Act5C
955	chrX	5815312	5815446	chrX	5921279	5921413	springer	7522	7138	25	134	9-16	69.6	8	2.77778	intron	CG3726
956	chrX	5827847	5827983	chrX	5933814	5933950	springer	6	7523	15	136	9-6	67.53	18	0.789474	intron	CG3726
957	chrX	6115114	6115240	chrX	6221081	6221207	gypsy	6987	460	17	126	9-8	64.82	8	1.88889	intron	Efr
958	chrX	6228398	6228523	chrX	6334365	6334490	springer	7516	2	21	125	11-10	69.67	19	1.05	intergenic	CG42240
959	chrX	6545957	6546068	chrX	6651924	6652035	springer	363	7137	11	111	4-7	70.36	9	1.1	3` UTR	pigs
960	chrX	6604852	6604968	chrX	6710819	6710935	springer	7510	5	21	116	8-13	68.9	18	1.10526	intron	CG14441
961	chrX	6757674	6757786	chrX	6863641	6863753	springer	7158	385	4	112	2-2	64.5	19	0.2	intergenic	not near genes
962	chrX	6809818	6809952	chrX	6915785	6915919	gypsy	463	6986	38	134	18-20	68.61	23	1.58333	intron	CG14431
963	chrX	6881399	6881527	chrX	6987366	6987494	copia	4870	255	11	128	8-3	68.27	1	5.5	intergenic	ogre
964	chrX	6884648	6884779	chrX	6990615	6990746	gypsy	7448	6987	31	131	14-17	73.29	27	1.10714	intergenic	Inx7
965	chrX	7426557	7426684	chrX	7532524	7532651	springer	7139	7518	14	127	6-8	65.5	11	1.16667	intergenic	not near genes
966	chrX	7771882	7772015	chrX	7877849	7877982	roo	410	8663	46	133	23-23	71.26	7	5.75	exon	Ir7d
967	chrX	7906255	7906370	chrX	8012222	8012337	springer	7521	7154	13	115	6-7	68.62	5	2.16667	intron	Tbh
968	chrX	7922392	7922523	chrX	8028359	8028490	297	6973	6580	18	131	8-10	73.56	7	2.25	intergenic	Tbh
969	chrX	7932758	7932846	chrX	8038725	8038813	297	40	4	10	88	6-4	77.8	1	5	3` UTR	fs(1)h
970	chrX	7934548	7934664	chrX	8040515	8040631	gypsy	6986	7432	18	116	13-5	70.06	13	1.28571	3` UTR	fs(1)h
971	chrX	8052382	8052514	chrX	8158349	8158481	mdg3	5249	244	17	132	13-4	69.76	13	1.21429	exon	GIIIspla2
972	chrX	8082313	8082445	chrX	8188280	8188412	297	2	394	17	132	11-6	68.82	2	5.66667	intron	sdt
973	chrX	8101693	8101792	chrX	8207660	8207759	297	6580	6945	11	99	8-3	66	0	11	intron	sdt
974	chrX	8128051	8128170	chrX	8234018	8234137	springer	14	7522	22	119	11-11	70.09	9	2.2	intron	sdt
975	chrX	8129038	8129152	chrX	8235005	8235119	springer	379	13	15	114	6-9	66.2	21	0.681818	intron	sdt
976	chrX	8153054	8153167	chrX	8259021	8259134	springer	7524	7159	22	113	7-15	70.41	5	3.66667	intron	CG1632
977	chrX	8153060	8153189	chrX	8259027	8259156	gypsy	1	460	17	129	10-7	71.29	3	4.25	intron	CG1632
978	chrX	8470784	8470894	chrX	8576751	8576861	springer	10	7509	9	110	4-5	62	7	1.125	intron	CG12065
979	chrX	8769142	8769269	chrX	8875109	8875236	gypsy	7444	6987	28	127	13-15	65.82	20	1.33333	exon	Moe
980	chrX	8797975	8798098	chrX	8903942	8904065	297	6592	392	7	123	1-6	73.43	1	3.5	intergenic	Rbm13
981	chrX	8839115	8839238	chrX	8945082	8945205	roo	408	8671	36	123	21-15	69.14	1	18	intron	rdgA
982	chrX	8905246	8905358	chrX	9011213	9011325	flea	4775	5013	14	112	5-9	69.57	10	1.27273	intron	rdgA
983	chrX	9025065	9025189	chrX	9131032	9131156	gypsy	6986	453	12	124	5-7	66.67	14	0.8	intron	fend
984	chrX	9122141	9122269	chrX	9228108	9228236	roo	9067	8662	47	128	23-24	64.83	5	7.83333	exon	Gr8a
985	chrX	9236631	9236756	chrX	9342598	9342723	FB	1	1	35	125	13-22	67.43	2	11.6667	intron	CG34449
986	chrX	9470534	9470655	chrX	9576501	9576622	FB	3	3	39	121	15-24	66.1	3	9.75	intron	CG32699
987	chrX	9542308	9542433	chrX	9648275	9648400	springer	7519	7142	18	125	12-6	66.72	8	2	intron	l(1)G0232
988	chrX	9623335	9623429	chrX	9729302	9729396	springer	20	7503	8	94	7-1	62.88	3	2	intergenic	CR43498
989	chrX	9679948	9680079	chrX	9785915	9786046	opus	7115	496	37	131	21-16	68.32	0	37	intergenic	CG32698
990	chrX	9796328	9796446	chrX	9902295	9902413	3S18	329	1	14	118	1-13	67.36	2	4.66667	intergenic	not near genes
991	chrX	9931083	9931216	chrX	10037050	10037183	roo	409	8662	43	133	18-25	65.07	2	14.3333	exon	Cht6
992	chrX	9940814	9940946	chrX	10046781	10046913	blood	1	379	60	132	32-28	65.25	3	15	intron	Cht6
993	chrX	9958114	9958225	chrX	10064081	10064192	jockey	4759	4981	21	111	12-9	67.67	0	21	intron	CG15312
994	chrX	10089692	10089802	chrX	10195659	10195769	mdg3	5492	5267	4	110	1-3	67.75	11	0.333333	intergenic	CG43902
995	chrX	10175858	10175990	chrX	10281825	10281957	Transpac	310	4919	42	132	26-16	75.55	2	14	intron	alpha-Man-I
996	chrX	10180657	10180788	chrX	10286624	10286755	mdg3	248	5254	23	131	8-15	64.26	4	4.6	intron	alpha-Man-I
997	chrX	10189020	10189094	chrX	10294987	10295061	copia	4874	5073	6	74	4-2	71	5	1	intron	alpha-Man-I
998	chrX	10255398	10255505	chrX	10361365	10361472	springer	7	7503	14	107	12-2	67.29	13	1	intron	l(1)G0289
999	chrX	10272765	10272892	chrX	10378732	10378859	roo	2	407	38	127	23-15	66.26	0	38	intron	CG17841
1000	chrX	10427896	10428029	chrX	10533863	10533996	gypsy	6986	462	18	133	11-7	68.78	24	0.72	intron	spri
1001	chrX	10680078	10680197	chrX	10786045	10786164	springer	7152	7523	21	119	12-9	66.71	19	1.05	intergenic	sesB
1002	chrX	10697301	10697421	chrX	10803268	10803388	springer	383	11	16	120	7-9	67.5	12	1.23077	intron	Imp
1003	chrX	10736815	10736928	chrX	10842782	10842895	gypsy	15	458	13	113	5-8	63.15	9	1.3	intron	sbr
1004	chrX	10793425	10793552	chrX	10899392	10899519	412	4	493	45	127	20-25	65.47	3	11.25	intergenic	CG1582
1005	chrX	10827357	10827490	chrX	10933324	10933457	mdg3	5251	247	6	133	2-4	77.17	22	0.26087	intron	Myo10A
1006	chrX	10843029	10843155	chrX	10948996	10949122	pogo	1	2094	40	126	20-20	67.55	2	13.3333	intron	Myo10A
1007	chrX	11023890	11024010	chrX	11129857	11129977	mdg3	5256	5491	9	120	8-1	73.33	18	0.473684	3` UTR	Klp10A
1008	chrX	11333259	11333382	chrX	11439226	11439349	springer	7145	383	5	123	3-2	65.6	7	0.625	intron	Evi5
1009	chrX	11519808	11519922	chrX	11625775	11625889	FB	6	7	25	114	8-17	68.96	0	25	intron	Ptp10D
1010	chrX	11599357	11599495	chrX	11705324	11705462	accord	181	7029	4	138	3-1	75.25	0	4	intergenic	PhKgamma
1011	chrX	11751253	11751357	chrX	11857220	11857324	gypsy	435	1	11	104	6-5	68.36	13	0.785714	intron	ATP7
1012	chrX	11778685	11778807	chrX	11884652	11884774	copia	247	4869	22	122	7-15	70.55	6	3.14286	intron	CG10353
1013	chrX	11849721	11849852	chrX	11955688	11955819	flea	4754	256	9	131	5-4	73.44	1	4.5	intron	cac
1014	chrX	11915148	11915256	chrX	12021115	12021223	gypsy6	7418	7779	4	108	1-3	61.25	29	0.133333	5` UTR	Tango4
1015	chrX	11915155	11915285	chrX	12021122	12021252	springer	7143	388	22	130	15-7	66.14	42	0.511628	5` UTR	Tango4
1016	chrX	12001280	12001406	chrX	12107247	12107373	mdg3	5259	248	11	126	9-2	69.09	24	0.44	5` UTR	CG2750
1017	chrX	12104377	12104508	chrX	12210344	12210475	springer	7139	383	10	131	8-2	63.5	13	0.714286	intron	Ten-a
1018	chrX	12108491	12108601	chrX	12214458	12214568	flea	246	4769	6	110	5-1	61.67	2	2	intron	Ten-a
1019	chrX	12166633	12166767	chrX	12272600	12272734	copia	4868	258	18	134	13-5	73.67	5	3	intron	Ten-a
1020	chrX	12247345	12247511	chrX	12353312	12353478	HB	328	328	4	166	3-1	72.25	8	0.444444	intergenic	not near genes
1021	chrX	12320377	12320485	chrX	12426344	12426452	blood	7386	20	37	108	24-13	66.57	1	18.5	intergenic	not near genes
1022	chrX	12321654	12321781	chrX	12427621	12427748	mdg3	240	5250	22	127	6-16	65.32	16	1.29412	intergenic	not near genes
1023	chrX	12323014	12323141	chrX	12428981	12429108	mdg3	5258	248	13	127	10-3	69.15	16	0.764706	intergenic	not near genes
1024	chrX	12436915	12437029	chrX	12542882	12542996	roo	410	8675	27	114	11-16	61.81	0	27	intron	CG43921
1025	chrX	12578692	12578789	chrX	12684659	12684756	HMS-Beagle	38	249	24	97	11-13	70.88	2	8	3` UTR	Smr
1026	chrX	12790519	12790641	chrX	12896486	12896608	1360	3385	3	46	122	24-22	66.15	0	46	intron	Pde9
1027	chrX	13067693	13067821	chrX	13173660	13173788	gypsy	7448	6986	41	128	21-20	68.07	1	20.5	intron	CG34411
1028	chrX	13124700	13124783	chrX	13230667	13230750	I-element	5329	10	13	83	4-9	65.85	0	13	intron	mew
1029	chrX	13130874	13131018	chrX	13236841	13236985	mdg3	5270	248	7	144	2-5	44	0	7	intron	mew
1030	chrX	13131684	13131797	chrX	13237651	13237764	pogo	2098	18	34	113	22-12	65.68	0	34	intron	mew
1031	chrX	13218556	13218680	chrX	13324523	13324647	springer	2	378	20	124	10-10	63.4	19	1	intron	IP3K2
1032	chrX	13335818	13335892	chrX	13441785	13441859	Juan	4185	15	14	74	7-7	67.07	0	14	intergenic	not near genes
1033	chrX	13336884	13337007	chrX	13442851	13442974	gypsy	459	6993	25	123	9-16	66.4	20	1.19048	intergenic	not near genes
1034	chrX	13513952	13514083	chrX	13619919	13620050	gypsy	6986	460	22	131	15-7	68.32	26	0.814815	exon	CG2691
1035	chrX	13529187	13529309	chrX	13635154	13635276	FB	3	2	37	122	22-15	65.35	2	12.3333	intron	NFAT
1036	chrX	13535453	13535572	chrX	13641420	13641539	copia	250	6	15	119	9-6	69.8	25	0.576923	intron	NFAT
1037	chrX	13686135	13686264	chrX	13792102	13792231	springer	383	7136	5	129	2-3	77.2	14	0.333333	intron	inaE
1038	chrX	13710103	13710225	chrX	13816070	13816192	FB	3	2	36	122	23-13	68.22	2	12	intron	Clic
1039	chrX	13727594	13727716	chrX	13833561	13833683	S-element	1708	1712	16	122	5-11	65.31	0	16	intron	CG32626
1040	chrX	13784217	13784349	chrX	13890184	13890316	gypsy	460	6985	23	132	9-14	68.35	15	1.4375	intron	mamo
1041	chrX	14035084	14035184	chrX	14141051	14141151	Burdock	6139	228	15	100	14-1	66.33	0	15	intergenic	not near genes
1042	chrX	14153198	14153316	chrX	14259165	14259283	roo	402	8670	31	118	20-11	67.81	1	15.5	intergenic	mud
1043	chrX	14224889	14225025	chrX	14330856	14330992	mdg3	5252	251	47	136	21-26	70.32	7	5.875	intron	dpr8
1044	chrX	14371635	14371765	chrX	14477602	14477732	springer	7141	7523	21	130	6-15	72.81	11	1.75	intron	CG9411
1045	chrX	14376278	14376392	chrX	14482245	14482359	springer	376	7143	14	114	2-12	70.64	1	7	intergenic	CG9411
1046	chrX	14388561	14388661	chrX	14494528	14494628	springer	7154	369	15	100	9-6	66.4	13	1.07143	intergenic	CG12540
1047	chrX	14494931	14495029	chrX	14600898	14600996	jockey	6	4976	11	98	7-4	64.82	0	11	intron	CG9413
1048	chrX	14518769	14518874	chrX	14624736	14624841	roo	9044	8662	29	105	16-13	70.66	4	5.8	intron	NetA
1049	chrX	14562608	14562734	chrX	14668575	14668701	springer	7522	7142	8	126	3-5	67.25	0	8	intergenic	not near genes
1050	chrX	14600638	14600777	chrX	14706605	14706744	Tabor	3	486	42	139	25-17	64.79	3	10.5	intron	NetB
1051	chrX	14718703	14718805	chrX	14824670	14824772	Bari1	1677	3	17	102	8-9	67.35	11	1.41667	intron	rut
1052	chrX	14906494	14906599	chrX	15012461	15012566	mdg3	248	5264	18	105	15-3	56.5	0	18	exon	hiw
1053	chrX	14922439	14922562	chrX	15028406	15028529	copia	4876	255	9	123	6-3	66.67	12	0.692308	intron	hiw
1054	chrX	14971831	14971946	chrX	15077798	15077913	S-element	1706	1711	15	115	10-5	64.07	0	15	intergenic	Lsd-2
1055	chrX	15330444	15330573	chrX	15436411	15436540	opus	4	499	30	129	14-16	72.77	1	15	intron	cngl
1056	chrX	15492692	15492817	chrX	15598659	15598784	copia	250	4869	17	125	4-13	68.41	1	8.5	intergenic	not near genes
1057	chrX	15706994	15707119	chrX	15812961	15813086	gypsy	462	7	15	125	6-9	72	22	0.652174	intron	sd
1058	chrX	15806395	15806502	chrX	15912362	15912469	S-element	1702	1706	6	107	5-1	61.33	0	6	intron	CG8909
1059	chrX	16213134	16213272	chrX	16319101	16319239	copia	4864	258	16	138	9-7	66.56	19	0.8	intron	Cyp1
1060	chrX	16377968	16378085	chrX	16483935	16484052	flea	5002	4759	10	117	5-5	67.7	19	0.5	intron	para
1061	chrX	16619238	16619372	chrX	16725205	16725339	copia	4867	257	27	134	22-5	68	3	6.75	intron	CG32572
1062	chrX	16644015	16644136	chrX	16749982	16750103	springer	7519	9	13	121	4-9	69.69	17	0.722222	intron	CG9634
1063	chrX	16653562	16653836	chrX	16759529	16759803	gypsy	7446	7432	34	274	18-16	70.47	43	0.772727	intron	if
1064	chrX	16668544	16668700	chrX	16774511	16774667	springer	7174	7497	14	156	5-9	54.71	40	0.341463	intron	if
1065	chrX	16793387	16793506	chrX	16899354	16899473	gypsy	454	7	12	119	9-3	63.75	2	4	intergenic	CG33252
1066	chrX	16809584	16809718	chrX	16915551	16915685	copia	4867	257	20	134	13-7	65.2	20	0.952381	intron	CG4928
1067	chrX	16813602	16813732	chrX	16919569	16919699	gypsy	6988	461	18	130	9-9	68	17	1	intron	CG4928
1068	chrX	16839502	16839609	chrX	16945469	16945576	gypsy6	7417	7777	5	107	1-4	62.6	20	0.238095	intron	RhoGAP15B
1069	chrX	16839530	16839636	chrX	16945497	16945603	springer	26	7521	16	106	8-8	70.62	16	0.941176	intron	RhoGAP15B
1070	chrX	16840820	16840932	chrX	16946787	16946899	springer	7523	7159	20	112	11-9	64.4	16	1.17647	intron	RhoGAP15B
1071	chrX	17005182	17005301	chrX	17111149	17111268	springer	7140	7511	18	119	13-5	69.44	4	3.6	intron	CG5004
1072	chrX	17058395	17058519	chrX	17164362	17164486	FB	1	2	33	124	18-15	67.97	5	5.5	intron	baz
1073	chrX	17073122	17073254	chrX	17179089	17179221	297	395	6582	22	132	13-9	72.18	1	11	intron	baz
1074	chrX	17081143	17081264	chrX	17187110	17187231	roo	8664	9062	37	121	21-16	66.46	0	37	exon	baz
1075	chrX	17148368	17148479	chrX	17254335	17254446	opus	12	491	16	111	2-14	69.5	0	16	intron	f
1076	chrX	17191186	17191290	chrX	17297153	17297257	copia	232	4872	14	104	3-11	69.14	8	1.55556	intron	Fim
1077	chrX	17288925	17289050	chrX	17394892	17395017	roo	400	8661	23	125	8-15	74.52	5	3.83333	intergenic	B-H1
1078	chrX	17306126	17306255	chrX	17412093	17412222	297	6973	6582	23	129	22-1	69.91	1	11.5	intergenic	CG8611
1079	chrX	17361573	17361655	chrX	17467540	17467622	springer	7147	379	14	82	11-3	57.21	0	14	intron	CG43658
1080	chrX	17692245	17692342	chrX	17798212	17798309	roo	35	410	21	97	7-14	70.62	0	21	intron	OdsH
1081	chrX	17731972	17732094	chrX	17837939	17838061	S-element	1715	1705	13	122	10-3	65.31	0	13	intron	CG6398
1082	chrX	18133117	18133466	chrX	18239084	18239433	jockey	58	7	47	349	18-29	65.68	72	0.643836	intergenic	upd2
1083	chrX	18142048	18142171	chrX	18248015	18248138	copia	8	256	18	123	12-6	67.11	29	0.6	intergenic	not near genes
1084	chrX	18337912	18338033	chrX	18443879	18444000	pogo	7	2095	36	121	21-15	69.69	3	9	3` UTR	CG32547
1085	chrX	18365176	18365269	chrX	18471143	18471236	Juan	4182	4073	13	93	1-12	60.38	0	13	intron	CG32547
1086	chrX	18369544	18369662	chrX	18475511	18475629	412	14	494	35	118	14-21	68.49	2	11.6667	intron	CG32547
1087	chrX	18599441	18599573	chrX	18705408	18705540	springer	7138	7522	29	132	16-13	71.17	28	1	intergenic	CCKLR-17D1
1088	chrX	18636813	18636948	chrX	18742780	18742915	opus	110	498	44	135	14-30	72.32	9	4.4	intergenic	CG6873
1089	chrX	18697262	18697389	chrX	18803229	18803356	gypsy	7447	6990	23	127	12-11	70.91	18	1.21053	intron	Pk17E
1090	chrX	18698521	18698639	chrX	18804488	18804606	springer	12	382	21	118	10-11	64.71	1	10.5	intron	Pk17E
1091	chrX	18831502	18831626	chrX	18937469	18937593	FB	2	1	33	124	17-16	64.7	3	8.25	intron	CG43759
1092	chrX	18942829	18942927	chrX	19048796	19048894	gypsy	6987	7415	15	98	9-6	68.8	4	3	intergenic	Diedel3
1093	chrX	18965037	18965169	chrX	19071004	19071136	springer	7136	7520	7	132	2-5	72.14	24	0.28	intergenic	CG34330
1094	chrX	19041126	19041255	chrX	19147093	19147222	springer	7522	4	13	129	8-5	69	15	0.8125	intron	RhoGAP18B
1095	chrX	19056605	19056729	chrX	19162572	19162696	pogo	2094	3	47	124	21-26	68.06	0	47	intergenic	not near genes
1096	chrX	19184876	19185003	chrX	19290843	19290970	springer	7138	7517	16	127	8-8	65.94	19	0.8	intron	CG8034
1097	chrX	19204280	19204401	chrX	19310247	19310368	jockey	4666	4985	27	121	11-16	68.96	1	13.5	intergenic	CG8051
1098	chrX	19212006	19212135	chrX	19317973	19318102	copia	2	256	12	129	8-4	69.17	16	0.705882	intron	out
1099	chrX	19230114	19230218	chrX	19336081	19336185	flea	4760	231	11	104	6-5	69	10	1	intron	gfA
1100	chrX	19249015	19249144	chrX	19354982	19355111	copia	255	1	10	129	2-8	75.2	10	0.909091	intron	kek5
1101	chrX	19356092	19356220	chrX	19462059	19462187	roo	403	8661	34	128	19-15	72.53	3	8.5	intron	kek5
1102	chrX	19501839	19501967	chrX	19607806	19607934	S-element	1712	1714	16	128	8-8	69.19	2	5.33333	intron	CG14207
1103	chrX	19677988	19678115	chrX	19783955	19784082	gypsy	2	459	17	127	9-8	69.41	10	1.54545	intergenic	vfl
1104	chrX	19681835	19681955	chrX	19787802	19787922	springer	7512	7140	15	120	6-9	65.47	6	2.14286	intergenic	not near genes
1105	chrX	19744189	19744319	chrX	19850156	19850286	gypsy	458	6985	26	130	16-10	66.19	28	0.896552	intron	pico
1106	chrX	19779164	19779489	chrX	19885131	19885456	springer	7516	7523	30	325	12-18	67.33	61	0.483871	intron	Hers
1107	chrX	19781122	19781246	chrX	19887089	19887213	hopper	6	1414	45	124	18-27	66.82	4	9	intron	Hers
1108	chrX	19784498	19784628	chrX	19890465	19890595	HMS-Beagle	244	6796	30	130	14-16	73.67	1	15	intron	Hers
1109	chrX	19882667	19882787	chrX	19988634	19988754	412	485	3	27	120	20-7	67.11	0	27	intergenic	not near genes
1110	chrX	19888733	19888855	chrX	19994700	19994822	roo	407	7	22	122	11-11	69.91	1	11	intergenic	not near genes
1111	chrX	19931819	19931952	chrX	20037786	20037919	roo	8661	408	44	133	21-23	70.36	7	5.5	intergenic	not near genes
1112	chrX	19943726	19943848	chrX	20049693	20049815	Bari1	12	1706	25	122	8-17	68.8	15	1.5625	intergenic	CG9570
1113	chrX	19960666	19960782	chrX	20066633	20066749	opus	11	7496	19	116	17-2	67.42	0	19	intergenic	not near genes
1114	chrX	19977470	19977595	chrX	20083437	20083562	hopper	1412	1412	41	125	21-20	67.39	2	13.6667	intergenic	not near genes
1115	chrX	20041216	20041347	chrX	20147183	20147314	gypsy	462	1	27	131	8-19	70.33	14	1.8	intergenic	CG9572
1116	chrX	20043162	20043242	chrX	20149129	20149209	springer	7499	7167	11	80	7-4	66.55	4	2.2	intron	CG9572
1117	chrX	20390646	20390768	chrX	20519619	20519741	springer	8	382	23	122	11-12	69.04	12	1.76923	intron	Tak1
1118	chrX	20391501	20391632	chrX	20520474	20520605	springer	3	7523	31	131	14-17	71.77	42	0.72093	intron	Tak1
1119	chrX	20435912	20436005	chrX	20564885	20564978	flea	5012	36	13	93	8-5	71.31	0	13	exon	RunxB
1120	chrX	20723790	20723891	chrX	20852763	20852864	springer	22	375	13	101	6-7	70.08	9	1.3	intron	shakB
1121	chrX	20750516	20750644	chrX	20879489	20879617	flea	4754	5008	20	128	13-7	75.15	10	1.81818	intron	shakB
1122	chrX	20777765	20777880	chrX	20906738	20906853	copia	4	244	6	115	5-1	66.5	1	3	intron	shakB
1123	chrX	20862053	20862182	chrX	20991026	20991155	mdg1	7036	7455	18	129	8-10	68.33	0	18	intergenic	not near genes
1124	chrX	20870540	20870628	chrX	20999513	20999601	BS	5071	1	20	88	9-11	65.65	0	20	intergenic	not near genes
1125	chrX	20885016	20885142	chrX	21013989	21014115	mdg3	5255	5496	10	126	8-2	67.2	9	1	intergenic	not near genes
1126	chrX	20900620	20900716	chrX	21029593	21029689	roo	410	8700	22	96	6-16	71.32	0	22	3` UTR	CG1529
1127	chrX	20942097	20942218	chrX	21071070	21071191	springer	9	7519	10	121	9-1	61	27	0.357143	intron	bves
1128	chrX	20945826	20945928	chrX	21074799	21074901	springer	17	371	16	102	11-5	63.88	15	1	intron	bves
1129	chrX	20958582	20958702	chrX	21087555	21087675	mdg3	5251	234	17	120	15-2	67.35	0	17	intergenic	not near genes
1130	chrX	21066528	21066647	chrX	21195501	21195620	Quasimodo	7	7361	12	119	7-5	70.75	1	6	intergenic	CG14579
1131	chrX	21076013	21076112	chrX	21204986	21205085	1360	3364	11	12	99	4-8	64.83	0	12	intergenic	CG1724
1132	chrX	21076179	21076259	chrX	21205152	21205232	mdg1	7410	7039	8	80	5-3	72.75	0	8	intergenic	CG1724
1133	chrX	21118311	21118430	chrX	21247284	21247403	gypsy	448	457	22	119	11-11	68	18	1.15789	intron	CG32521
1134	chrX	21120123	21120258	chrX	21249096	21249231	blood	379	7009	64	135	32-32	66.94	5	10.6667	intron	CG32521
1135	chrX	21152511	21152635	chrX	21281484	21281608	springer	382	6	16	124	5-11	77.19	18	0.842105	intergenic	CG32521
1136	chrX	21155846	21155967	chrX	21284819	21284940	springer	1	7511	8	121	5-3	66.38	24	0.32	intergenic	CG1494
1137	chrX	21313880	21314013	chrX	21442853	21442986	roo	8666	407	22	133	1-21	68.05	3	5.5	intron	CG42343
1138	chrX	21336139	21336261	chrX	21465112	21465234	springer	7145	7519	24	122	13-11	65.88	24	0.96	intergenic	not near genes
1139	chrX	21400214	21400284	chrX	21529187	21529257	gypsy	7013	7413	7	70	5-2	60.43	26	0.259259	intergenic	not near genes
1140	chrX	21457459	21457585	chrX	21586432	21586558	Transpac	4937	310	27	126	5-22	67.41	5	4.5	intergenic	not near genes
1141	chrX	21662487	21662561	chrX	21791460	21791534	gypsy11	4360	4309	12	74	8-4	56.58	0	12	intergenic	not near genes
1142	chrX	21886747	21886942	chrX	22484911	22485106	INE-1	116	548	5	195	1-4	74.2	0	5	intron	Cp110
1143	chrX	21919385	21919536	chrX	22517549	22517700	1360	11	8	11	151	3-8	64.18	0	11	intron	CG17600
1144	chrX	22059448	22059566	chrX	22657612	22657730	springer	14	7521	22	118	13-9	67.05	18	1.15789	intergenic	not near genes
1145	chrX	22078200	22078296	chrX	22676364	22676460	opus	7462	7113	31	96	14-17	71.42	5	5.16667	intergenic	not near genes
1146	chrX	22249030	22249142	chrX	22847194	22847306	gypsy	1	7430	22	112	16-6	71.59	18	1.15789	intron	fog
1147	chrX	22250001	22250124	chrX	22848165	22848288	gypsy	3	456	18	123	10-8	67.17	6	2.57143	intron	fog
1148	chrX	22263264	22263400	chrX	22861428	22861564	gypsy	465	6986	39	136	19-20	64.85	7	4.875	intron	CG42346
1149	chrX	22264339	22264460	chrX	22862503	22862624	springer	383	10	19	121	11-8	71.11	16	1.11765	intron	CG42346
1150	chrX	22300933	22301041	chrX	22899097	22899205	gypsy	6997	7435	17	108	8-9	67.12	11	1.41667	intergenic	not near genes
1151	chrX	22319187	22319278	chrX	22917351	22917442	mdg3	5252	206	34	91	22-12	68.38	3	8.5	5` UTR	CR41352
1152	chrX	22368781	22368910	chrX	22966945	22967074	gypsy	3	462	22	129	10-12	69.36	28	0.758621	intergenic	not near genes

## Sheet: OSS_E_TE_Inserts
Table S4. De novo TE insertions in Drosophila gonadal cell cultures. Tab: OSS_E_TE_Inserts
Insertion#	Release 5 coordinates			Release 6 coordinates			TE	TE_coord_start	TE_coord_end	TE_Insert_Reads	Chr_Coord_Dist	Symmetry	avg_BLAT_score	RefGenome_Reads	Coverage_Ratio	Classification	Comments
	Chr	Chr_coord_start	Chr_coord_end	Chr	Chr_coord_start	Chr_coord_end
1	chr2L	72350	72540	chr2L	72350	72540	gypsy	6999	7418	18	190	11-7	71.63	8	2	intron	galectin
2	chr2L	127471	127657	chr2L	127471	127657	gypsy	7429	7013	22	186	9-13	66.73	7	2.75	intron	CG11455
3	chr2L	244232	244447	chr2L	244232	244447	FB	8	4	15	215	12-3	65.73	12	1.15385	intron	kis
4	chr2L	492016	492174	chr2L	492016	492174	FB	42	29	11	158	4-7	72.73	11	0.916667	intron	ush
5	chr2L	512590	512788	chr2L	512590	512788	mdg3	5265	5477	10	198	6-4	68.33	11	0.833333	intron	ush
6	chr2L	637684	637786	chr2L	637684	637786	412	492	7081	5	102	1-4	63.6	0	5	intergenic	ds
7	chr2L	759053	759227	chr2L	759053	759227	I-element	4	5305	12	174	8-4	71.61	5	2	exon	GABA-B-R3
8	chr2L	839751	839960	chr2L	839751	839960	gypsy	7446	20	21	209	10-11	67.24	12	1.61538	intron	drongo
9	chr2L	841705	841931	chr2L	841705	841931	gypsy	7443	6993	16	226	7-9	73.5	2	5.33333	intron	drongo
10	chr2L	961114	961175	chr2L	961114	961175	F-element	99	37	6	61	4-2	64.33	0	6	intergenic	not near genes
11	chr2L	1121288	1121487	chr2L	1121288	1121487	gypsy	6991	431	20	199	15-5	65.57	11	1.66667	intron	Pino
12	chr2L	1196954	1197120	chr2L	1196954	1197120	I-element	19	5323	12	166	4-8	65.5	6	1.71429	intergenic	CG5001
13	chr2L	1228633	1228854	chr2L	1228633	1228854	roo	8664	397	18	221	8-10	70.04	13	1.28571	exon	CG42329
14	chr2L	1466220	1466403	chr2L	1466220	1466403	gypsy	7439	7022	11	183	5-6	63.45	0	11	intergenic	not near genes
15	chr2L	1472485	1472687	chr2L	1472485	1472687	springer	16	7506	8	202	3-5	66.58	9	0.8	intergenic	not near genes
16	chr2L	1643938	1644170	chr2L	1643938	1644170	mdg1	420	7038	5	232	3-2	77.06	5	0.833333	intergenic	not near genes
17	chr2L	1648569	1648791	chr2L	1648569	1648791	gypsy	459	6993	28	222	12-16	69.24	11	2.33333	intergenic	not near genes
18	chr2L	1668990	1669138	chr2L	1668990	1669138	gypsy	7421	53	9	148	4-5	66.37	0	9	intron	chinmo
19	chr2L	1833690	1833871	chr2L	1833690	1833871	copia	221	4885	6	181	3-3	63.11	2	2	intergenic	c-cup
20	chr2L	1889354	1889572	chr2L	1889354	1889572	diver	14	225	15	218	7-8	70.35	3	3.75	intergenic	not near genes
21	chr2L	1915625	1915856	chr2L	1915625	1915856	gypsy	460	6988	17	231	8-9	74	25	0.653846	intron	CG7337
22	chr2L	1916630	1916716	chr2L	1916630	1916716	gypsy	446	7349	5	86	3-2	70.67	0	5	intron	CG7337
23	chr2L	1931233	1931440	chr2L	1931233	1931440	mdg3	229	5261	14	207	7-7	70.52	6	2	intron	CG7337
24	chr2L	2345581	2345796	chr2L	2345581	2345796	hopper	1414	17	7	215	2-5	72.86	3	1.75	intron	CG9967
25	chr2L	2374186	2374354	chr2L	2374186	2374354	hobo	2924	26	11	168	5-6	61.82	0	11	intergenic	CG3597
26	chr2L	2635573	2635788	chr2L	2635573	2635788	copia	4880	249	11	215	4-7	67.03	8	1.22222	intergenic	not near genes
27	chr2L	2703365	2703621	chr2L	2703365	2703621	412	2	7544	17	256	5-12	65.69	21	0.772727	intron	CG31690
28	chr2L	2753674	2753895	chr2L	2753674	2753895	Burdock	248	4	11	221	4-7	77.03	8	1.22222	intron	CG9894
29	chr2L	2918039	2918243	chr2L	2918039	2918243	297	358	6582	7	204	6-1	79.05	0	7	intron	lilli
30	chr2L	3112763	3112925	chr2L	3112763	3112925	flea	4773	4961	12	162	10-2	65.78	6	1.71429	intron	toc
31	chr2L	3115028	3115244	chr2L	3115028	3115244	gypsy	452	7	19	216	9-10	70.81	8	2.11111	intron	toc
32	chr2L	3344658	3344829	chr2L	3344658	3344829	gypsy	431	27	15	171	7-8	66.4	3	3.75	intron	E23
33	chr2L	3628349	3628578	chr2L	3628349	3628578	roo	8668	411	15	229	9-6	70.67	0	15	intron	for
34	chr2L	3911413	3911612	chr2L	3911413	3911612	gypsy6	7419	7771	4	199	1-3	69.5	10	0.363636	intron	fred
35	chr2L	3911426	3911618	chr2L	3911426	3911618	springer	13	7492	14	192	9-5	65.48	6	2	intron	fred
36	chr2L	3970132	3970340	chr2L	3970132	3970340	springer	12	7516	19	208	17-2	70.03	19	0.95	intron	fred
37	chr2L	4120325	4120717	chr2L	4120325	4120717	gypsy	424	7007	26	392	16-10	73.69	13	1.85714	intergenic	Sr-CIII
38	chr2L	4181008	4181213	chr2L	4181008	4181213	Transpac	1	5201	13	205	8-5	74.77	10	1.18182	intergenic	not near genes
39	chr2L	4240214	4240446	chr2L	4240214	4240446	gypsy	454	6985	21	232	2-19	69.71	2	7	intergenic	CR44058
40	chr2L	4244613	4244850	chr2L	4244613	4244850	copia	4867	259	8	237	4-4	74.33	8	0.888889	intergenic	CR44058
41	chr2L	4254382	4254615	chr2L	4254382	4254615	gypsy	462	6988	15	233	4-11	69.96	0	15	intergenic	not near genes
42	chr2L	4317445	4317665	chr2L	4317445	4317665	gypsy	7446	6995	20	220	7-13	69.17	23	0.833333	intron	tutl
43	chr2L	4318360	4318575	chr2L	4318360	4318575	gypsy	7444	12	23	215	12-11	66.15	18	1.21053	intron	tutl
44	chr2L	4403936	4404108	chr2L	4403936	4404108	roo	401	53	11	172	5-6	72.55	4	2.2	3` UTR	Dim1
45	chr2L	4627125	4627346	chr2L	4627125	4627346	gypsy	7441	5	21	221	12-9	68.95	11	1.75	intergenic	not near genes
46	chr2L	4746691	4746861	chr2L	4746691	4746861	pogo	2052	16	8	170	2-6	61.83	10	0.727273	intron	CG15630
47	chr2L	4760345	4760549	chr2L	4760345	4760549	blood	362	14	25	204	8-17	71.12	5	4.16667	intron	CG15630
48	chr2L	4776458	4776685	chr2L	4776458	4776685	roo	8671	411	15	227	8-7	73.02	14	1	intron	CG15630
49	chr2L	4862613	4862804	chr2L	4862613	4862804	gypsy	7412	6993	18	191	9-9	70.7	6	2.57143	intron	pog
50	chr2L	4892814	4893031	chr2L	4892814	4893031	I-element	6	5347	20	217	12-8	67.2	4	4	intron	CG3036
51	chr2L	5064475	5064634	chr2L	5064475	5064634	Max-element	8515	8287	22	159	10-12	62.91	2	7.33333	intron	qtc
52	chr2L	5113518	5113736	chr2L	5113518	5113736	gypsy	7435	2	20	218	4-16	68.47	1	10	intron	Msp-300
53	chr2L	5121225	5121424	chr2L	5121225	5121424	Ivk	5344	5	12	199	3-9	73.61	0	12	intron	Msp-300
54	chr2L	5219183	5219389	chr2L	5219183	5219389	opus	7028	7499	20	206	6-14	69.8	1	10	3` UTR	tkv
55	chr2L	5258029	5258183	chr2L	5258029	5258183	gypsy	7000	7383	13	154	5-8	74.56	5	2.16667	intron	tkv
56	chr2L	5291640	5291805	chr2L	5291640	5291805	opus	32	461	13	165	3-10	66.46	3	3.25	intergenic	not near genes
57	chr2L	5292421	5292525	chr2L	5292421	5292525	gypsy	461	7344	7	104	5-2	70.86	5	1.16667	intergenic	not near genes
58	chr2L	5294217	5294437	chr2L	5294217	5294437	gypsy	7435	6987	16	220	7-9	69.96	1	8	intergenic	not near genes
59	chr2L	5422849	5423067	chr2L	5422849	5423067	297	5	386	17	218	9-8	66.31	0	17	intergenic	not near genes
60	chr2L	5481404	5481542	chr2L	5481404	5481542	mdg3	20	174	8	138	3-5	71.17	0	8	intergenic	not near genes
61	chr2L	5705488	5705591	chr2L	5705488	5705591	jockey	4669	4774	19	103	12-7	72.56	1	9.5	intergenic	CG7236
62	chr2L	5710841	5711072	chr2L	5710841	5711072	gypsy	6994	462	22	231	15-7	68.64	1	11	intron	CG7236
63	chr2L	5711812	5712030	chr2L	5711812	5712030	412	481	3	40	218	13-27	69.25	0	40	intron	CG7236
64	chr2L	6292925	6293020	chr2L	6292925	6293020	F-element	339	435	15	95	5-10	69.07	0	15	intron	Ddr
65	chr2L	6464766	6464987	chr2L	6464766	6464987	297	6580	382	27	221	17-10	67.06	2	9	intron	CG16947
66	chr2L	6569155	6569315	chr2L	6569155	6569315	412	7101	458	11	160	3-8	60.97	0	11	intron	CG11319
67	chr2L	6781720	6781919	chr2L	6781720	6781919	gypsy	459	7020	18	199	8-10	73.41	2	6	intron	nrv1
68	chr2L	6900603	6900812	chr2L	6900603	6900812	mdg3	249	5278	6	209	3-3	70.33	1	3	intron	neuroligin
69	chr2L	7139786	7139976	chr2L	7139786	7139976	copia	1	254	9	190	3-6	68	1	4.5	intron	Pvf3
70	chr2L	7459533	7459699	chr2L	7459533	7459699	BS	5043	5085	16	166	6-10	67.63	0	16	intron	Gr28b
71	chr2L	7489133	7489359	chr2L	7489133	7489359	copia	257	4875	19	226	6-13	70.14	0	19	intron	CG42533
72	chr2L	7540898	7541102	chr2L	7540898	7541102	roo	14	394	33	204	18-15	73.23	0	33	intron	Rapgap1
73	chr2L	7722156	7722389	chr2L	7722156	7722389	roo	409	8664	17	233	11-6	71.76	0	17	exon	CG13794
74	chr2L	7840290	7840513	chr2L	7840290	7840513	Bari1	2	1695	14	223	10-4	69.72	0	14	exon	CG43100
75	chr2L	8296073	8296282	chr2L	8296073	8296282	17.6	7407	7	19	209	10-9	70.6	0	19	intron	Btk29A
76	chr2L	8583979	8584172	chr2L	8583979	8584172	gypsy	7020	7441	15	193	9-6	68.31	6	2.14286	intron	Sema-1a
77	chr2L	8614907	8615000	chr2L	8614907	8615000	F-element	11	103	5	93	2-3	67.73	0	5	intron	Sema-1a
78	chr2L	8722719	8722950	chr2L	8722719	8722950	gypsy	6987	7447	19	231	13-6	68.88	2	6.33333	intron	raw
79	chr2L	8776791	8777098	chr2L	8776791	8777098	G4	3690	3737	5	307	3-2	69.33	0	5	intergenic	CG9466
80	chr2L	8833126	8833345	chr2L	8833126	8833345	rover	336	3	16	219	7-9	75.5	11	1.33333	intergenic	not near genes
81	chr2L	8856160	8856351	chr2L	8856160	8856351	mdg1	7433	7052	15	191	11-4	67.82	10	1.36364	intergenic	not near genes
82	chr2L	8959841	8960038	chr2L	8959841	8960038	Ivk	5085	5353	21	197	17-4	62.06	0	21	3` UTR	CG9525
83	chr2L	9142269	9142446	chr2L	9142269	9142446	gypsy	6987	406	8	177	4-4	73.33	0	8	intron	CG32982
84	chr2L	9232860	9233075	chr2L	9232860	9233075	gypsy	7436	457	15	215	10-5	67.42	5	2.5	intron	tai
85	chr2L	9287078	9287143	chr2L	9287078	9287143	jockey	4907	4973	11	65	3-8	56.97	0	11	intron	CG43733
86	chr2L	9383557	9383725	chr2L	9383557	9383725	copia	83	257	9	168	2-7	58.74	0	9	intron	Shawl
87	chr2L	9466937	9467126	chr2L	9466937	9467126	roo	9050	21	25	189	18-7	64.05	0	25	intergenic	numb
88	chr2L	9487134	9487229	chr2L	9487134	9487229	jockey	18	114	11	95	3-8	70.24	0	11	intergenic	not near genes
89	chr2L	9502179	9502385	chr2L	9502179	9502385	gypsy	7429	7	21	206	7-14	70.92	7	2.625	intron	CG33298
90	chr2L	9547350	9547432	chr2L	9547350	9547432	jockey	4686	4768	13	82	7-6	70	0	13	3` UTR	CG13114
91	chr2L	9596721	9596943	chr2L	9596721	9596943	gypsy	455	5	13	222	5-8	67.13	3	3.25	intergenic	CG4382
92	chr2L	9606409	9606499	chr2L	9606409	9606499	I-element	5244	5334	11	90	6-5	67.39	0	11	intergenic	gcm2
93	chr2L	9629304	9629505	chr2L	9629304	9629505	mdg1	11	7440	16	201	6-10	68.62	0	16	intergenic	not near genes
94	chr2L	9666666	9666761	chr2L	9666666	9666761	jockey	4986	4893	18	95	10-8	72.63	0	18	intergenic	not near genes
95	chr2L	9683752	9683980	chr2L	9683752	9683980	gypsy	462	1	16	228	6-10	78	4	3.2	3` UTR	Pka-C1
96	chr2L	9930770	9930994	chr2L	9930770	9930994	blood	5	374	32	224	17-15	68.17	0	32	exon	CG42367
97	chr2L	10082042	10082250	chr2L	10082042	10082250	roo	5	9052	15	208	8-7	65.69	0	15	intron	CG44153
98	chr2L	10338332	10338402	chr2L	10338332	10338402	blood	292	361	6	70	4-2	67.78	0	6	exon	GATAd
99	chr2L	10588381	10588597	chr2L	10588381	10588597	gypsy	7435	6990	20	216	6-14	67.2	10	1.81818	intron	Trim9
100	chr2L	10808848	10809075	chr2L	10808848	10809075	Max-element	302	7	15	227	4-11	69.02	9	1.5	intron	Nos
101	chr2L	10995883	10996102	chr2L	10995883	10996102	pogo	2085	1	8	219	6-2	66.42	2	2.66667	intron	CG16833
102	chr2L	11064625	11064785	chr2L	11064625	11064785	412	460	40	11	160	8-3	68.79	0	11	intron	Samuel
103	chr2L	11151400	11151584	chr2L	11151400	11151584	opus	7475	23	18	184	11-7	65.04	0	18	intergenic	Gyc32E
104	chr2L	11374053	11374256	chr2L	11374053	11374256	gypsy	7429	6996	21	203	5-16	70.86	9	2.1	intergenic	salr
105	chr2L	11419865	11419951	chr2L	11419865	11419951	I-element	5251	5338	7	86	4-3	66.09	0	7	intergenic	not near genes
106	chr2L	11528271	11528394	chr2L	11528271	11528394	pogo	6	60	12	123	10-2	67.56	4	2.4	intergenic	CG31705
107	chr2L	11530369	11530602	chr2L	11530369	11530602	gypsy	6985	460	27	233	12-15	69.7	7	3.375	intron	CG31706
108	chr2L	11591536	11591761	chr2L	11591536	11591761	412	495	9	16	225	9-7	68.08	0	16	5` UTR	CG15841
109	chr2L	11652667	11652894	chr2L	11652667	11652894	gypsy	6988	459	19	227	8-11	69.3	3	4.75	exon	CG4983
110	chr2L	11659774	11659965	chr2L	11659774	11659965	Ivk	22	5372	8	191	3-5	62.67	9	0.8	intergenic	CG43167
111	chr2L	11737052	11737276	chr2L	11737052	11737276	gypsy5	412	12	17	224	13-4	68.75	15	1.0625	5` UTR	CR44145
112	chr2L	11771199	11771419	chr2L	11771199	11771419	297	371	14	12	220	7-5	58.94	0	12	intergenic	not near genes
113	chr2L	11819975	11820120	chr2L	11819975	11820120	412	25	429	7	145	4-3	68.29	0	7	intron	Pde1c
114	chr2L	12004353	12004580	chr2L	12004353	12004580	1360	3388	3386	31	227	19-12	68.22	1	15.5	intergenic	CG6746
115	chr2L	12229764	12229972	chr2L	12229764	12229972	hopper	13	11	19	208	11-8	67.09	0	19	intergenic	not near genes
116	chr2L	12370053	12370263	chr2L	12370053	12370263	gypsy	7438	12	18	210	6-12	72.15	14	1.2	intron	bru-2
117	chr2L	12528581	12528755	chr2L	12528581	12528755	copia	228	4899	8	174	6-2	68.58	1	4	intron	bun
118	chr2L	12750878	12751018	chr2L	12750878	12751018	flea	157	4754	5	140	2-3	76.4	0	5	intergenic	not near genes
119	chr2L	12861662	12861727	chr2L	12861662	12861727	jockey	21	88	5	65	1-4	61.33	0	5	intergenic	not near genes
120	chr2L	13036588	13036743	chr2L	13036588	13036743	roo	8688	354	10	155	7-3	69.2	4	2	intron	CG9932
121	chr2L	13085919	13086095	chr2L	13085919	13086095	Juan	4024	4172	4	176	1-3	76.66	3	1	intergenic	not near genes
122	chr2L	13338498	13338724	chr2L	13338498	13338724	297	5	391	11	226	6-5	68.24	18	0.578947	intergenic	not near genes
123	chr2L	13362119	13362264	chr2L	13362119	13362264	17.6	464	53	4	145	3-1	72.34	0	4	intergenic	CG9377
124	chr2L	13375997	13376221	chr2L	13375997	13376221	mdg3	5254	239	8	224	5-3	71.5	0	8	3` UTR	CG6565
125	chr2L	13442475	13442660	chr2L	13442475	13442660	Juan	4191	9	10	185	4-6	70.47	5	1.66667	intron	CG42784
126	chr2L	13553760	13553949	chr2L	13553760	13553949	roo	9035	8670	15	189	11-4	70.09	7	1.875	intron	kuz
127	chr2L	13571320	13571544	chr2L	13571320	13571544	gypsy	7445	5	12	224	6-6	72.72	7	1.5	intron	kuz
128	chr2L	13574099	13574314	chr2L	13574099	13574314	297	18	6974	8	215	4-4	70.25	2	2.66667	intron	kuz
129	chr2L	13589008	13589137	chr2L	13589008	13589137	mdg1	367	7088	7	129	5-2	67.43	1	3.5	intron	kuz
130	chr2L	13624139	13624343	chr2L	13624139	13624343	roo	390	8674	13	204	7-6	70.77	10	1.18182	intron	kuz
131	chr2L	13642770	13643003	chr2L	13642770	13643003	gypsy	6985	7448	27	233	17-10	69.98	12	2.07692	intergenic	ics
132	chr2L	13732011	13732166	chr2L	13732011	13732166	mdg3	22	5440	9	155	5-4	64.52	0	9	intergenic	not near genes
133	chr2L	13819773	13819914	chr2L	13819773	13819914	diver	5978	224	12	141	4-8	69.56	1	6	3` UTR	Sos
134	chr2L	13913715	13913799	chr2L	13913715	13913799	Ivk	120	24	12	84	6-6	70.33	0	12	intergenic	Ance-2
135	chr2L	13929098	13929255	chr2L	13929098	13929255	copia	4870	178	7	157	5-2	63.91	1	3.5	intron	Ance-3
136	chr2L	14009776	14009994	chr2L	14009776	14009994	pogo	2095	11	8	218	5-3	66.58	7	1	intergenic	CG42692
137	chr2L	14023907	14024089	chr2L	14023907	14024089	Burdock	227	23	16	182	9-7	69.96	6	2.28571	intergenic	not near genes
138	chr2L	14074947	14075029	chr2L	14074947	14075029	jockey	10	92	8	82	3-5	69.33	0	8	intron	nAcRalpha-34E
139	chr2L	14252310	14252385	chr2L	14252310	14252385	jockey	17	93	5	75	1-4	70.93	0	5	intergenic	not near genes
140	chr2L	14256781	14256975	chr2L	14256781	14256975	flea	227	4755	9	194	2-7	67.93	2	3	intergenic	not near genes
141	chr2L	14403850	14404060	chr2L	14403850	14404060	gypsy	7427	6988	15	210	4-11	72.13	1	7.5	intron	elB
142	chr2L	14437472	14437652	chr2L	14437472	14437652	gypsy	6997	419	13	180	4-9	73.03	9	1.3	intergenic	not near genes
143	chr2L	14463533	14463703	chr2L	14463533	14463703	I-element	5	5308	7	170	6-1	62	5	1.16667	intergenic	not near genes
144	chr2L	14465521	14465594	chr2L	14465521	14465594	flea	4779	4852	7	73	4-3	68.76	0	7	intergenic	not near genes
145	chr2L	14493728	14493948	chr2L	14493728	14493948	gypsy	7434	6985	8	220	1-7	79.5	3	2	3` UTR	noc
146	chr2L	14529294	14529517	chr2L	14529294	14529517	gypsy	3	7441	20	223	12-8	67.53	11	1.66667	intergenic	not near genes
147	chr2L	14546543	14546728	chr2L	14546543	14546728	gypsy	22	435	10	185	6-4	64.13	6	1.42857	intergenic	CG4218
148	chr2L	14664927	14665071	chr2L	14664927	14665071	FB	17	68	9	144	3-6	77.48	4	1.8	intron	osp
149	chr2L	14774522	14774712	chr2L	14774522	14774712	Burdock	242	30	12	190	7-5	69.78	5	2	exon	CG4650
150	chr2L	14782742	14782969	chr2L	14782742	14782969	gypsy	4	7446	23	227	18-5	74.78	1	11.5	intergenic	CG18636
151	chr2L	14792408	14792503	chr2L	14792408	14792503	opus	497	7405	11	95	5-6	67.21	2	3.66667	intergenic	CG18420
152	chr2L	14878649	14878862	chr2L	14878649	14878862	mdg1	409	20	9	213	8-1	65.26	10	0.818182	intergenic	CG15278
153	chr2L	14892812	14892992	chr2L	14892812	14892992	copia	232	28	5	180	3-2	67.73	2	1.66667	intergenic	not near genes
154	chr2L	14951748	14951957	chr2L	14951748	14951957	mdg1	19	417	12	209	1-11	69	10	1.09091	intron	CG42313
155	chr2L	14969588	14969798	chr2L	14969588	14969798	rover	9	332	16	210	5-11	68.42	0	16	intron	CG42313
156	chr2L	14983393	14983569	chr2L	14983393	14983569	gypsy	439	7021	10	176	5-5	69.4	0	10	intron	mol
157	chr2L	15097016	15097232	chr2L	15097016	15097232	flea	9	247	8	216	5-3	75.17	5	1.33333	intergenic	CG15270
158	chr2L	15168890	15169097	chr2L	15168890	15169097	Stalker2	392	7261	27	207	17-10	64.72	0	27	intron	CG4168
159	chr2L	15335881	15336067	chr2L	15335881	15336067	springer	7148	7484	17	186	12-5	71.65	5	2.83333	3` UTR	esg
160	chr2L	15341760	15341978	chr2L	15341760	15341978	gypsy	6986	445	20	218	14-6	67.43	7	2.5	intergenic	not near genes
161	chr2L	15538705	15538913	chr2L	15538705	15538913	mdg1	7441	6	6	208	1-5	71.22	0	6	intergenic	not near genes
162	chr2L	15743574	15743800	chr2L	15743574	15743800	pogo	2	2094	28	226	12-16	67.48	0	28	intron	CycE
163	chr2L	15875984	15876163	chr2L	15875984	15876163	Juan	31	4204	8	179	7-1	64.75	0	8	intergenic	CG7653
164	chr2L	15888244	15888439	chr2L	15888244	15888439	mdg3	5264	233	11	195	8-3	72.18	5	1.83333	intergenic	Tep1
165	chr2L	15920508	15920707	chr2L	15920508	15920707	copia	16	240	5	199	2-3	74.26	3	1.25	intron	beat-Ib
166	chr2L	15930901	15931123	chr2L	15930901	15931123	HMS-Beagle	233	6795	14	222	3-11	66.95	8	1.55556	intron	beat-Ib
167	chr2L	16025353	16025557	chr2L	16025353	16025557	1360	3369	3382	18	204	7-11	64.96	8	2	intron	beat-Ic
168	chr2L	16197256	16197342	chr2L	16197256	16197342	flea	4864	4779	11	86	6-5	69.88	0	11	intergenic	not near genes
169	chr2L	16215701	16215920	chr2L	16215701	16215920	roo	8668	399	16	219	9-7	72.46	9	1.6	intergenic	CG31819
170	chr2L	16268500	16268714	chr2L	16268500	16268714	copia	2	240	10	214	7-3	76.67	6	1.42857	intron	crp
171	chr2L	16276165	16276360	chr2L	16276165	16276360	opus	7041	483	8	195	2-6	67.17	0	8	intron	crp
172	chr2L	16285340	16285570	chr2L	16285340	16285570	gypsy	7448	1	16	230	8-8	74.75	13	1.14286	intron	crp
173	chr2L	16361605	16361702	chr2L	16361605	16361702	jockey	4677	4775	10	97	7-3	65.87	0	10	intergenic	not near genes
174	chr2L	16367171	16367403	chr2L	16367171	16367403	3S18	4	345	13	232	6-7	74.26	1	6.5	intergenic	jhamt
175	chr2L	16379240	16379434	chr2L	16379240	16379434	flea	226	9	12	194	4-8	70.89	0	12	intergenic	not near genes
176	chr2L	16394923	16394996	chr2L	16394923	16394996	Burdock	6220	6146	5	73	1-4	67.6	0	5	intergenic	not near genes
177	chr2L	16447439	16447637	chr2L	16447439	16447637	gypsy	6993	433	18	198	14-4	67.37	0	18	intron	CG5888
178	chr2L	16492943	16493166	chr2L	16492943	16493166	1360	4	4	24	223	12-12	65.06	0	24	intron	Tpr2
179	chr2L	16534691	16534892	chr2L	16534691	16534892	gypsy	421	1	6	201	1-5	68	0	6	intergenic	CG5953
180	chr2L	16538648	16538857	chr2L	16538648	16538857	copia	238	5	5	209	3-2	74.13	4	1	intergenic	not near genes
181	chr2L	16547986	16548174	chr2L	16547986	16548174	FB	32	8	11	188	8-3	70.91	6	1.57143	intergenic	CG5968
182	chr2L	16586449	16586650	chr2L	16586449	16586650	Bari1	30	1701	12	201	3-9	71.33	1	6	intergenic	not near genes
183	chr2L	16623226	16623418	chr2L	16623226	16623418	HMS-Beagle2	7188	34	11	192	3-8	70.55	3	2.75	intron	CG42389
184	chr2L	16727455	16727660	chr2L	16727455	16727660	1360	3375	11	22	205	7-15	71.3	0	22	exon	VhaSFD
185	chr2L	16777681	16777892	chr2L	16777681	16777892	gypsy	7431	6992	18	211	7-11	71.78	14	1.2	intron	Mhc
186	chr2L	17038747	17038967	chr2L	17038747	17038967	gypsy	449	7001	18	220	6-12	68.78	0	18	intergenic	not near genes
187	chr2L	17042833	17043046	chr2L	17042833	17043046	412	13	489	26	213	16-10	65.77	0	26	3` UTR	CR43802
188	chr2L	17105272	17105379	chr2L	17105272	17105379	412	7169	3	24	107	10-14	74.19	2	8	intergenic	not near genes
189	chr2L	17377413	17377602	chr2L	17377413	17377602	Juan	4195	8	10	189	8-2	68.93	0	10	intron	Lrch
190	chr2L	17685574	17685785	chr2L	17685574	17685785	412	10	7539	17	211	10-7	69.84	0	17	intron	CadN
191	chr2L	17732795	17733017	chr2L	17732795	17733017	gypsy	456	6	27	222	12-15	68.25	2	9	intron	CadN
192	chr2L	17866904	17867095	chr2L	17866904	17867095	Idefix	7349	1	9	191	2-7	71.48	1	4.5	intron	CadN2
193	chr2L	17930035	17930245	chr2L	17930035	17930245	flea	4755	231	4	210	2-2	73.17	3	1	intergenic	not near genes
194	chr2L	17959416	17959593	chr2L	17959416	17959593	opus	25	498	11	177	6-5	68.55	0	11	intergenic	not near genes
195	chr2L	17998197	17998400	chr2L	17998197	17998400	BS	15	5083	15	203	4-11	64.67	0	15	intergenic	not near genes
196	chr2L	18135305	18135525	chr2L	18135305	18135525	Quasimodo	7357	2	14	220	5-9	71.67	1	7	intron	kel
197	chr2L	18213985	18214094	chr2L	18213985	18214094	jockey	4668	4777	25	109	13-12	68.24	3	6.25	intron	CG42750
198	chr2L	18231714	18231896	chr2L	18231714	18231896	roo	8699	9057	20	182	12-8	66.07	0	20	intron	CG42750
199	chr2L	18267876	18268100	chr2L	18267876	18268100	gypsy	6990	454	16	224	10-6	74.54	7	2	intron	CG42750
200	chr2L	18270688	18270783	chr2L	18270688	18270783	F-element	22	116	7	95	2-5	70.76	0	7	intron	CG42750
201	chr2L	18311389	18311589	chr2L	18311389	18311589	flea	4986	4761	5	200	1-4	72.67	2	1.66667	intergenic	CG43353
202	chr2L	18338917	18339144	chr2L	18338917	18339144	mdg3	5259	247	28	227	17-11	71.95	1	14	intron	Fas3
203	chr2L	18381419	18381646	chr2L	18381419	18381646	gypsy	7441	6985	13	227	4-9	72.15	5	2.16667	intron	Fas3
204	chr2L	18648114	18648299	chr2L	18648114	18648299	17.6	7412	40	14	185	5-9	61.9	0	14	intron	MESR3
205	chr2L	19089975	19090201	chr2L	19089975	19090201	Stalker2	8	405	40	226	21-19	71.15	3	10	intron	Lim3
206	chr2L	19100064	19100127	chr2L	19100064	19100127	flea	13	4833	11	63	7-4	61.21	0	11	intron	Lim3
207	chr2L	19108769	19108949	chr2L	19108769	19108949	gypsy	458	7037	20	180	10-10	68.37	10	1.81818	intergenic	Lim3
208	chr2L	19154435	19154505	chr2L	19154435	19154505	Bari1	75	5	8	70	5-3	65.67	0	8	intron	brat
209	chr2L	19276938	19277151	chr2L	19276938	19277151	I-element	6	5350	14	213	8-6	70.57	8	1.55556	intergenic	not near genes
210	chr2L	19290008	19290073	chr2L	19290008	19290073	Doc	327	392	13	65	8-5	64.36	0	13	intergenic	not near genes
211	chr2L	19476335	19476523	chr2L	19476335	19476523	gypsy	442	24	16	188	7-9	70.29	16	0.941176	intergenic	not near genes
212	chr2L	19609420	19609610	chr2L	19609420	19609610	roo	8682	386	23	190	12-11	67.1	0	23	intron	Lar
213	chr2L	19634919	19635117	chr2L	19634919	19635117	flea	4774	5001	11	198	9-2	68.79	0	11	intron	Lar
214	chr2L	19640974	19641188	chr2L	19640974	19641188	roo	8666	9054	20	214	11-9	70.83	0	20	intron	Lar
215	chr2L	19806510	19806704	chr2L	19806510	19806704	copia	4873	221	28	194	20-8	69.69	0	28	intron	sick
216	chr2L	19908040	19908235	chr2L	19908040	19908235	roo	9036	2	23	195	7-16	72.7	0	23	intron	sick
217	chr2L	20286802	20286892	chr2L	20286802	20286892	F-element	17	105	20	90	12-8	65.6	0	20	intergenic	not near genes
218	chr2L	20463497	20463653	chr2L	20463497	20463653	3S18	77	342	17	156	8-9	70.94	1	8.5	intergenic	cdc23
219	chr2L	20629401	20629614	chr2L	20629401	20629614	412	7070	491	26	213	11-15	71.72	0	26	intergenic	not near genes
220	chr2L	20668725	20668925	chr2L	20668725	20668925	roo	5	9043	21	200	11-10	66.76	0	21	intron	CG31678
221	chr2L	20801014	20801224	chr2L	20801014	20801224	gypsy	19	459	19	210	9-10	70.25	8	2.11111	intergenic	not near genes
222	chr2L	20808253	20808459	chr2L	20808253	20808459	gypsy	16	444	5	206	4-1	73.07	0	5	intergenic	CG9328
223	chr2L	20837497	20837715	chr2L	20837497	20837715	gypsy	460	7001	20	218	7-13	73.7	12	1.53846	exon	Spn38F
224	chr2L	20961829	20962001	chr2L	20961829	20962001	gypsy	7429	7029	11	172	7-4	68.48	1	5.5	intergenic	not near genes
225	chr2L	21032059	21032122	chr2L	21032059	21032122	springer	304	7503	8	63	3-5	64.25	0	8	intron	CG42238
226	chr2L	21057579	21057687	chr2L	21057579	21057687	roo	85	9032	14	108	8-6	75.76	0	14	3` UTR	betaInt-nu
227	chr2L	21089148	21089315	chr2L	21089148	21089315	flea	4944	4753	21	167	10-11	77.78	1	10.5	intergenic	CG33509
228	chr2L	21109009	21109397	chr2L	21109009	21109397	gypsy	33	7032	19	388	4-15	70.07	33	0.558824	intergenic	CR44056
229	chr2L	21279542	21279607	chr2L	21279542	21279607	flea	4800	4864	8	65	1-7	82.66	0	8	intron	CG8671
230	chr2L	21325058	21325131	chr2L	21325058	21325131	invader4	3053	2980	12	73	7-5	76.5	0	12	intergenic	CG42696
231	chr2L	21557058	21557246	chr2L	21557058	21557246	mdg1	1	7415	28	188	15-13	69.21	0	28	intergenic	not near genes
232	chr2L	21652597	21652831	chr2L	21652597	21652831	gypsy	462	6987	25	234	5-20	75.31	7	3.125	intergenic	not near genes
233	chr2L	21691753	21691830	chr2L	21691753	21691830	297	388	6893	6	77	2-4	69.89	0	6	intron	CG31619
234	chr2L	21702417	21702633	chr2L	21702417	21702633	roo	391	8663	12	216	7-5	76.94	1	6	intron	CG31619
235	chr2L	21802884	21803074	chr2L	21802884	21803074	flea	4829	4796	12	190	1-11	68.22	3	3	intergenic	not near genes
236	chr2L	21804206	21804441	chr2L	21804206	21804441	roo	8663	411	28	235	16-12	70.48	1	14	intergenic	not near genes
237	chr2L	22080626	22080827	chr2L	22080626	22080827	Transpac	4929	5210	29	201	16-13	66.69	0	29	exon	ttm3
238	chr2L	22094309	22094505	chr2L	22094309	22094505	flea	4754	214	22	196	19-3	69.64	1	11	intergenic	not near genes
239	chr2L	22424937	22425064	chr2L	22532205	22532332	gypsy6	86	7785	8	127	6-2	72.25	0	8	intergenic	RpL5
240	chr2L	22424975	22425054	chr2L	22532243	22532322	springer	7413	355	12	79	8-4	68	0	12	intergenic	RpL5
241	chr2R	75668	75746	chr2R	4188163	4188241	gypsy4	6699	6776	8	78	3-5	63.25	0	8	intergenic	CG40127
242	chr2R	184890	185028	chr2R	4297385	4297523	mdg1	7439	7109	6	138	3-3	68.67	7	0.75	intergenic	not near genes
243	chr2R	561010	561154	chr2R	4673505	4673649	Quasimodo	7360	34	7	144	4-3	62.95	0	7	3` UTR	CG17883
244	chr2R	774757	774976	chr2R	4887252	4887471	flea	5005	4762	22	219	6-16	71.88	0	22	intergenic	not near genes
245	chr2R	906247	906319	chr2R	5018742	5018814	rooA	7286	7360	8	72	2-6	65.5	0	8	intron	Ir41a
246	chr2R	958413	958492	chr2R	5070908	5070987	Tirant	7	8189	5	79	4-1	38.67	0	5	intergenic	TpnC41C
247	chr2R	1059457	1059534	chr2R	5171952	5172029	pogo	105	27	8	77	6-2	70.83	0	8	intergenic	not near genes
248	chr2R	1212111	1212362	chr2R	5324606	5324857	INE-1	101	84	5	251	4-1	70.13	1	2.5	intron	sxc
249	chr2R	1418671	1418762	chr2R	5531166	5531257	1360	151	54	10	91	6-4	70.67	0	10	intron	CG30438
250	chr2R	1562085	1562304	chr2R	5674580	5674799	S-element	1708	1705	7	219	3-4	73.62	0	7	intergenic	kune
251	chr2R	1842801	1843022	chr2R	5955296	5955517	mdg1	418	7047	19	221	12-7	66.46	0	19	intergenic	CG7882
252	chr2R	1997315	1997546	chr2R	6109810	6110041	gypsy	6989	461	22	231	15-7	67.45	14	1.46667	intron	EcR
253	chr2R	2006996	2007170	chr2R	6119491	6119665	gypsy	416	14	7	174	3-4	66	1	3.5	intron	EcR
254	chr2R	2058540	2058765	chr2R	6171035	6171260	micropia	450	1	29	225	18-11	70.78	1	14.5	intergenic	Cyp6w1
255	chr2R	2068151	2068369	chr2R	6180646	6180864	flea	4997	4754	18	218	5-13	73.56	0	18	intergenic	CG8343
256	chr2R	2092181	2092777	chr2R	6204676	6205272	gypsy	462	7372	26	596	22-4	71.15	57	0.448276	exon	CG30431
257	chr2R	2092787	2093036	chr2R	6205282	6205531	gypsy	374	7446	30	249	21-9	68.84	19	1.5	intergenic	CG30431
258	chr2R	2112376	2112580	chr2R	6224871	6225075	gypsy	19	7440	19	204	10-9	70.88	8	2.11111	intron	bin3
259	chr2R	2286529	2286634	chr2R	6399024	6399129	gtwin	104	3	8	105	7-1	73.83	47	0.166667	intergenic	not near genes
260	chr2R	2310143	2310237	chr2R	6422638	6422732	invader6	4585	4679	8	94	3-5	71.17	16	0.470588	intergenic	not near genes
261	chr2R	2325794	2325873	chr2R	6438289	6438368	Stalker4	388	7264	7	79	2-5	72.76	0	7	intergenic	not near genes
262	chr2R	2601297	2601481	chr2R	6713792	6713976	springer	11	7482	8	184	4-4	63.83	2	2.66667	intergenic	ZIP1
263	chr2R	2633592	2633826	chr2R	6746087	6746321	diver	5890	230	19	234	10-9	77.47	4	3.8	3` UTR	phtf
264	chr2R	2667226	2667423	chr2R	6779721	6779918	17.6	460	5	39	197	14-25	68.89	0	39	intron	Epac
265	chr2R	2705424	2705645	chr2R	6817919	6818140	blood	2	367	26	221	16-10	72	0	26	3` UTR	koi
266	chr2R	2720432	2720656	chr2R	6832927	6833151	1360	2	5	28	224	13-15	72	0	28	exon	CG15236
267	chr2R	2736882	2737075	chr2R	6849377	6849570	blood	7376	26	36	193	18-18	66.02	0	36	intergenic	not near genes
268	chr2R	2779872	2780102	chr2R	6892367	6892597	HMS-Beagle2	305	6881	27	230	11-16	72.42	0	27	intron	CG30158
269	chr2R	2902570	2902780	chr2R	7015065	7015275	gypsy	438	6986	10	210	6-4	66.27	1	5	intron	Tsp42Ee
270	chr2R	2976829	2976983	chr2R	7089324	7089478	springer	7467	25	9	154	4-5	64.96	7	1.125	intergenic	not near genes
271	chr2R	3055467	3055687	chr2R	7167962	7168182	gypsy	9	7444	13	220	7-6	67.54	16	0.764706	intergenic	not near genes
272	chr2R	3143224	3143454	chr2R	7255719	7255949	Bari1	3	1704	26	230	9-17	71.21	2	8.66667	intergenic	not near genes
273	chr2R	3749618	3749751	chr2R	7862113	7862246	hopper	1318	1413	9	133	4-5	72.44	0	9	intron	Dgk
274	chr2R	3815027	3815238	chr2R	7927522	7927733	gypsy	6997	451	40	211	29-11	69.18	0	40	intron	CG8791
275	chr2R	4087532	4087763	chr2R	8200027	8200258	gypsy	5	464	32	231	20-12	68.44	0	32	intron	LRP1
276	chr2R	4169391	4169606	chr2R	8281886	8282101	roo	9066	8676	20	215	5-15	72.23	0	20	intergenic	not near genes
277	chr2R	4191654	4191881	chr2R	8304149	8304376	ZAM	7964	8412	24	227	10-14	74.58	1	12	intergenic	not near genes
278	chr2R	4415541	4415757	chr2R	8528036	8528252	gypsy	7003	7448	18	216	7-11	70.3	28	0.62069	intron	mtt
279	chr2R	4949560	4949670	chr2R	9062055	9062165	jockey	116	5	15	110	13-2	73.91	0	15	intergenic	CG13743
280	chr2R	4973766	4973958	chr2R	9086261	9086453	Juan	22	4203	17	192	12-5	68.94	0	17	exon	CG13742
281	chr2R	5038736	5038838	chr2R	9151231	9151333	HMS-Beagle	6795	102	31	102	17-14	72.58	0	31	intron	CG30345
282	chr2R	5045296	5045371	chr2R	9157791	9157866	HMS-Beagle	6951	7030	12	75	6-6	67.67	0	12	intergenic	CG8008
283	chr2R	5125364	5125573	chr2R	9237859	9238068	copia	4873	238	23	209	17-6	66.9	0	23	intron	hig
284	chr2R	5295605	5295828	chr2R	9408100	9408323	FB	2	2	23	223	16-7	70	1	11.5	intron	wun
285	chr2R	5532319	5532556	chr2R	9644814	9645051	gypsy	6988	7447	30	237	18-12	67.29	3	7.5	intron	Mmp2
286	chr2R	5586192	5586387	chr2R	9698687	9698882	I-element	1	5342	22	195	13-9	62.03	0	22	intergenic	not near genes
287	chr2R	5758445	5758579	chr2R	9870940	9871074	roo	9055	8745	15	134	9-6	72.71	0	15	intergenic	cbx
288	chr2R	5947025	5947253	chr2R	10059520	10059748	gypsy	6987	7446	45	228	27-18	68.55	1	22.5	intron	magu
289	chr2R	6078558	6078665	chr2R	10191053	10191160	Stalker4	7061	6954	10	107	8-2	72.6	1	5	intergenic	not near genes
290	chr2R	6421881	6422101	chr2R	10534376	10534596	pogo	2099	16	11	220	4-7	64.79	0	11	intron	lola
291	chr2R	6509783	6509885	chr2R	10622278	10622380	gypsy	6985	7086	16	102	9-7	75.25	1	8	intron	CG11883
292	chr2R	6757004	6757147	chr2R	10869499	10869642	copia	184	4886	7	143	2-5	70.95	0	7	intron	CG30015
293	chr2R	6933160	6933345	chr2R	11045655	11045840	gypsy	7403	6987	19	185	2-17	68.42	1	9.5	intron	luna
294	chr2R	7539744	7539848	chr2R	11652239	11652343	Doc	9	113	5	104	1-4	81.73	0	5	exon	CG34228
295	chr2R	7850678	7850908	chr2R	11963173	11963403	Bari1	1	1702	12	230	3-9	73.05	11	1	intron	CG13188
296	chr2R	7889516	7889599	chr2R	12002011	12002094	jockey	4905	4988	14	83	6-8	58.19	0	14	3` UTR	otk
297	chr2R	8417260	8417479	chr2R	12529755	12529974	roo	2	398	32	219	24-8	71.54	0	32	exon	fra
298	chr2R	8585247	8585355	chr2R	12697742	12697850	1360	3284	3388	6	108	2-4	74.56	0	6	intergenic	wuc
299	chr2R	8704554	8704742	chr2R	12817049	12817237	297	4	355	13	188	5-8	66.05	0	13	intergenic	not near genes
300	chr2R	8782820	8783046	chr2R	12895315	12895541	rover	7293	4	28	226	7-21	71.91	2	9.33333	intron	vg
301	chr2R	9170832	9171051	chr2R	13283327	13283546	roo	402	8670	24	219	12-12	72.61	0	24	intron	Dh31-R1
302	chr2R	9240951	9241162	chr2R	13353446	13353657	roo	9054	3	35	211	14-21	71.89	2	11.6667	intron	CG44206
303	chr2R	9254717	9254921	chr2R	13367212	13367416	BS	3	5083	31	204	21-10	67.63	0	31	intergenic	not near genes
304	chr2R	9428588	9428807	chr2R	13541083	13541302	S-element	7	1707	16	219	6-10	70.96	0	16	intron	CG6145
305	chr2R	9502831	9503043	chr2R	13615326	13615538	gtwin	476	23	30	212	12-18	69.27	0	30	intergenic	not near genes
306	chr2R	9548810	9549029	chr2R	13661305	13661524	3S18	343	16	30	219	20-10	67.22	0	30	intron	fas
307	chr2R	9586952	9587058	chr2R	13699447	13699553	jockey	113	6	13	106	9-4	72.41	4	2.6	intron	fas
308	chr2R	9626414	9626636	chr2R	13738909	13739131	mdg3	5498	5263	10	222	7-3	74.2	1	5	intron	fas
309	chr2R	9865347	9865572	chr2R	13977842	13978067	gypsy	7445	5	40	225	21-19	69.65	1	20	exon	CG6701
310	chr2R	10193178	10193403	chr2R	14305673	14305898	roo	5	407	33	225	19-14	72.99	0	33	intergenic	Shroom
311	chr2R	10255111	10255207	chr2R	14367606	14367702	Doc	101	5	16	96	6-10	66.58	0	16	exon	CG34442
312	chr2R	10374038	10374264	chr2R	14486533	14486759	gypsy	461	6993	26	226	11-15	70.61	0	26	intron	L
313	chr2R	10435247	10435344	chr2R	14547742	14547839	blood	367	7281	26	97	10-16	68.1	0	26	intron	ttv
314	chr2R	10559961	10560138	chr2R	14672456	14672633	gypsy	411	6993	17	177	8-9	68.39	0	17	intron	mspo
315	chr2R	10767594	10767812	chr2R	14880089	14880307	Stalker2	7643	7254	25	218	4-21	70.03	0	25	exon	Cyp6a9
316	chr2R	10829581	10829686	chr2R	14942076	14942181	jockey	4864	4759	14	105	8-6	70.71	0	14	intergenic	Lap1
317	chr2R	10844724	10844821	chr2R	14957219	14957316	FB	57	75	12	97	7-5	73.5	0	12	intron	aPKC
318	chr2R	10882919	10883148	chr2R	14995414	14995643	1360	3385	7	23	229	12-11	67.02	0	23	intergenic	CG10265
319	chr2R	10995183	10995415	chr2R	15107678	15107910	1360	3385	3	14	232	7-7	64.43	0	14	intergenic	not near genes
320	chr2R	11062219	11062447	chr2R	15174714	15174942	mdg1	421	7041	30	228	18-12	68.18	0	30	intron	igl
321	chr2R	11262243	11262404	chr2R	15374738	15374899	1360	51	429	4	161	1-3	47.34	0	4	intergenic	dup
322	chr2R	11311542	11311764	chr2R	15424037	15424259	Transpac	4929	308	19	222	9-10	74.28	2	6.33333	intron	CG43729
323	chr2R	11415981	11416210	chr2R	15528476	15528705	gypsy	459	1	37	229	9-28	72.74	1	18.5	intron	Khc-73
324	chr2R	11581309	11581484	chr2R	15693804	15693979	Ivk	9	5355	16	175	12-4	61.42	0	16	intergenic	CG30090
325	chr2R	11632781	11633012	chr2R	15745276	15745507	gypsy	6991	463	29	231	16-13	68.34	0	29	intron	CG30089
326	chr2R	11720186	11720378	chr2R	15832681	15832873	Transpac	32	310	19	192	8-11	68.98	0	19	intron	Poxn
327	chr2R	11802860	11803062	chr2R	15915355	15915557	copia	4874	232	16	202	10-6	69.96	0	16	intron	sli
328	chr2R	11838388	11838612	chr2R	15950883	15951107	HMS-Beagle	6802	7039	51	224	25-26	69.05	0	51	intron	Strn-Mlck
329	chr2R	11845121	11845343	chr2R	15957616	15957838	gypsy	6989	7439	30	222	16-14	71.89	5	5	intron	Strn-Mlck
330	chr2R	11921841	11921945	chr2R	16034336	16034440	blood	7009	7119	15	104	10-5	67.2	0	15	intron	SP2353
331	chr2R	12198870	12198962	chr2R	16311365	16311457	gypsy	6989	7083	4	92	1-3	75.5	0	4	intron	Nox
332	chr2R	12612860	12613079	chr2R	16725355	16725574	gypsy	461	7001	39	219	17-22	68.77	0	39	intron	CG30463
333	chr2R	12620793	12621001	chr2R	16733288	16733496	springer	376	17	5	208	1-4	65.87	34	0.142857	intergenic	CG30463
334	chr2R	13264312	13264403	chr2R	17376807	17376898	flea	4845	4754	25	91	17-8	69.23	0	25	3` UTR	mbl
335	chr2R	13446253	13446480	chr2R	17558748	17558975	copia	256	5	24	227	11-13	72.67	2	8	intron	Klp54D
336	chr2R	13559981	13560200	chr2R	17672476	17672695	P-element	2883	2879	33	219	14-19	51.94	0	33	exon	P32
337	chr2R	14582203	14582266	chr2R	18694698	18694761	roo	405	9003	9	63	5-4	63.19	0	9	intron	Sik3
338	chr2R	14582298	14582394	chr2R	18694793	18694889	BS	4988	5085	9	96	5-4	73.33	0	9	intron	Sik3
339	chr2R	14804598	14804804	chr2R	18917093	18917299	Transpac	298	5	30	206	12-18	73.09	0	30	intron	sano
340	chr2R	14805310	14805521	chr2R	18917805	18918016	roo	410	6	14	211	3-11	70.28	0	14	intron	sano
341	chr2R	14943383	14943608	chr2R	19055878	19056103	roo	8665	403	27	225	13-14	71.88	0	27	exon	CG15116
342	chr2R	15045951	15046144	chr2R	19158446	19158639	297	371	16	14	193	10-4	68.24	0	14	intron	ena
343	chr2R	15068552	15068768	chr2R	19181047	19181263	gypsy	459	15	17	216	11-6	69.22	0	17	intron	hppy
344	chr2R	15108848	15109013	chr2R	19221343	19221508	I-element	5324	26	8	165	4-4	76.08	0	8	intron	hppy
345	chr2R	15506984	15507163	chr2R	19619479	19619658	FB	47	2	20	179	9-11	70.23	0	20	intron	sm
346	chr2R	15512230	15512452	chr2R	19624725	19624947	gypsy	7445	8	16	222	7-9	69.04	11	1.33333	intron	sm
347	chr2R	15535502	15535723	chr2R	19647997	19648218	roo	8670	402	34	221	20-14	71	0	34	intergenic	CG15905
348	chr2R	16295535	16295599	chr2R	20408030	20408094	F-element	44	108	9	64	6-3	62.89	0	9	intergenic	not near genes
349	chr2R	16300516	16300741	chr2R	20413011	20413236	diver	5893	222	27	225	11-16	63.9	0	27	intergenic	not near genes
350	chr2R	16324144	16324362	chr2R	20436639	20436857	17.6	7412	7	27	218	16-11	67.46	0	27	intron	CG12484
351	chr2R	16328469	16328694	chr2R	20440964	20441189	Tabor	485	6846	27	225	10-17	75.33	0	27	intron	CG12484
352	chr2R	16344410	16344630	chr2R	20456905	20457125	gypsy	7433	6985	16	220	6-10	66.83	1	8	intron	CG12484
353	chr2R	16361585	16361801	chr2R	20474080	20474296	copia	242	4871	14	216	3-11	66.57	0	14	intron	CG12484
354	chr2R	16701383	16701486	chr2R	20813878	20813981	F-element	116	12	15	103	4-11	65.82	0	15	intergenic	not near genes
355	chr2R	16729012	16729214	chr2R	20841507	20841709	gypsy	443	12	18	202	8-10	70.67	2	6	intergenic	not near genes
356	chr2R	16924981	16925132	chr2R	21037476	21037627	gypsy	7003	400	14	151	7-7	69.19	0	14	intergenic	not near genes
357	chr2R	17069711	17069903	chr2R	21182206	21182398	gypsy	16	7423	13	192	6-7	68.72	3	3.25	3` UTR	Pu
358	chr2R	17091138	17091344	chr2R	21203633	21203839	flea	235	4764	16	206	6-10	68.5	0	16	intron	Glycogenin
359	chr2R	17359503	17359732	chr2R	21471998	21472227	gypsy	5	462	13	229	8-5	73.9	4	2.6	intron	Sdc
360	chr2R	17436881	17437114	chr2R	21549376	21549609	gypsy	6987	462	23	233	15-8	71.19	7	2.875	intron	Egfr
361	chr2R	17620203	17620413	chr2R	21732698	21732908	I-element	10	5349	20	210	15-5	66.5	0	20	intergenic	not near genes
362	chr2R	17642860	17643076	chr2R	21755355	21755571	copia	247	4876	27	216	12-15	67.56	0	27	intergenic	Grx-1
363	chr2R	17819278	17819489	chr2R	21931773	21931984	Transpac	4940	5227	30	211	13-17	68.07	2	10	intron	Fili
364	chr2R	18067681	18067923	chr2R	22180176	22180418	gypsy	462	6988	43	242	21-22	72.73	0	43	intron	CG11170
365	chr2R	18548646	18548878	chr2R	22661141	22661373	Transpac	306	2	27	232	9-18	72.82	0	27	exon	CG42565
366	chr2R	18722453	18722651	chr2R	22834930	22835128	pogo	10	2074	14	198	12-2	68.67	7	1.75	intron	CG12490
367	chr2R	19241529	19241767	chr2R	23354006	23354244	gypsy	461	6986	24	238	8-16	73.19	0	24	intergenic	CG34210
368	chr2R	19320763	19320991	chr2R	23433240	23433468	roo	8664	404	37	228	22-15	71.13	2	12.3333	intergenic	not near genes
369	chr2R	20240890	20240979	chr2R	24353367	24353456	412	475	386	18	89	10-8	67	0	18	intron	bs
370	chr2R	20249313	20249395	chr2R	24361790	24361872	412	100	20	16	82	8-8	65.08	0	16	intron	bs
371	chr2R	20435977	20436157	chr2R	24548454	24548634	gypsy	2	7414	10	180	7-3	61.67	5	1.66667	intron	CG4622
372	chr2R	20739050	20739285	chr2R	24851527	24851762	opus	7113	498	31	235	20-11	69.38	2	10.3333	intergenic	CG3650
373	chr2R	20790221	20790429	chr2R	24902698	24902906	gypsy	443	6994	14	208	7-7	69.57	8	1.55556	intron	NaCP60E
374	chr3L	316849	317014	chr3L	316849	317014	FB	60	4	6	165	4-2	66.56	6	0.857143	intron	fwd
375	chr3L	319566	319783	chr3L	319566	319783	gypsy	15	7447	12	217	5-7	69.67	13	0.857143	intron	fwd
376	chr3L	485462	485699	chr3L	485462	485699	roo	412	8663	12	237	5-7	76.33	1	6	intron	klar
377	chr3L	641545	641759	chr3L	641545	641759	gypsy	7435	6	28	214	9-19	69.88	18	1.47368	5` UTR	CR43334
378	chr3L	726347	726521	chr3L	726347	726521	Bari1	1682	38	4	174	3-1	61.34	10	0.363636	intergenic	not near genes
379	chr3L	1023164	1023371	chr3L	1023164	1023371	roo	9	393	14	207	5-9	68.91	0	14	intron	trio
380	chr3L	1056691	1056791	chr3L	1056691	1056791	F-element	13	114	10	100	3-7	69.13	0	10	intron	bab1
381	chr3L	1083419	1083631	chr3L	1083419	1083631	gypsy	6995	441	12	212	3-9	67.78	0	12	intron	bab1
382	chr3L	1091167	1091399	chr3L	1091167	1091399	gypsy	461	1	25	232	9-16	71.76	23	1.04167	intron	bab1
383	chr3L	1094736	1094943	chr3L	1094736	1094943	copia	252	11	9	207	4-5	68.81	0	9	intron	bab1
384	chr3L	1120967	1121149	chr3L	1120967	1121149	gypsy	6988	7399	36	182	25-11	74.07	11	3	intergenic	not near genes
385	chr3L	1135318	1135510	chr3L	1135318	1135510	gypsy	448	7015	14	192	5-9	69.29	0	14	intergenic	not near genes
386	chr3L	1145859	1146076	chr3L	1145859	1146076	gypsy	6991	449	9	217	5-4	69.93	0	9	intron	bab2
387	chr3L	1397063	1397149	chr3L	1397063	1397149	Juan	4122	4208	7	86	4-3	65.43	0	7	intron	Ptp61F
388	chr3L	1440269	1440484	chr3L	1440269	1440484	gypsy	15	7446	20	215	12-8	71.93	1	10	intron	Ptp61F
389	chr3L	1546913	1547114	chr3L	1546913	1547114	blood	17	7375	22	201	14-8	64.58	4	4.4	intron	Cct1
390	chr3L	1882356	1882593	chr3L	1882356	1882593	gypsy	7006	7431	9	237	2-7	60.52	0	9	5` UTR	CG13937
391	chr3L	1916265	1916325	chr3L	1916265	1916325	roo	387	326	4	60	2-2	57.67	0	4	intergenic	not near genes
392	chr3L	1976094	1976321	chr3L	1976094	1976321	roo	409	6	6	227	2-4	71.78	8	0.666667	intergenic	CG1139
393	chr3L	2023122	2023349	chr3L	2023122	2023349	gypsy	458	6989	26	227	9-17	71.72	1	13	exon	CG42356
394	chr3L	2035209	2035338	chr3L	2035209	2035338	Juan	4178	56	5	129	1-4	71.73	2	1.66667	intergenic	CG42355
395	chr3L	2186063	2186290	chr3L	2186063	2186290	gypsy	4	7448	22	227	8-14	69.73	0	22	intron	CG13810
396	chr3L	2216518	2216660	chr3L	2216518	2216660	jockey	4925	24	13	142	3-10	65.95	0	13	intergenic	not near genes
397	chr3L	2225166	2225390	chr3L	2225166	2225390	roo	410	8672	19	224	9-10	71.51	1	9.5	intergenic	not near genes
398	chr3L	2248594	2248656	chr3L	2248594	2248656	opus	60	7115	9	62	2-7	69.26	0	9	3` UTR	CG32301
399	chr3L	2426585	2426810	chr3L	2426585	2426810	pogo	2098	3	5	225	3-2	74.8	0	5	intergenic	CG42669
400	chr3L	2474025	2474229	chr3L	2474025	2474229	roo	12	9055	13	204	10-3	73.08	0	13	intergenic	CG16762
401	chr3L	2485936	2486024	chr3L	2485936	2486024	jockey	110	21	9	88	6-3	71.7	1	4.5	intron	CG33232
402	chr3L	2488300	2488509	chr3L	2488300	2488509	gypsy	7430	6993	13	209	9-4	63.64	11	1.08333	intron	CG33232
403	chr3L	2675213	2675428	chr3L	2675213	2675428	mdg3	247	5270	14	215	10-4	73.1	4	2.8	intron	CG43955
404	chr3L	2844607	2844815	chr3L	2844607	2844815	hobo	14	2931	22	208	12-10	70.24	15	1.375	intron	CG43444
405	chr3L	3240444	3240665	chr3L	3240444	3240665	diver	217	5891	28	221	14-14	67.72	0	28	intergenic	CG17746
406	chr3L	3248026	3248249	chr3L	3248026	3248249	gypsy	7446	6994	15	223	6-9	72.71	6	2.14286	5` UTR	CG43389
407	chr3L	3353033	3353237	chr3L	3353033	3353237	roo	9049	8668	7	204	2-5	72.48	8	0.777778	intron	kst
408	chr3L	3393621	3393822	chr3L	3393621	3393822	gypsy	1	7419	16	201	8-8	73.37	10	1.45455	intergenic	not near genes
409	chr3L	3671429	3671667	chr3L	3671429	3671667	roo	4	407	6	238	1-5	54.11	0	6	intergenic	not near genes
410	chr3L	3738998	3739229	chr3L	3738998	3739229	297	1	395	16	231	9-7	72.46	3	4	intron	CG32264
411	chr3L	3798534	3798659	chr3L	3798534	3798659	1360	3356	73	4	125	3-1	61.17	0	4	intergenic	not near genes
412	chr3L	3963726	3963937	chr3L	3963726	3963937	gypsy	7429	6992	15	211	6-9	72.49	1	7.5	intron	CG12605
413	chr3L	4109683	4109911	chr3L	4109683	4109911	gypsy	6987	456	18	228	13-5	80.93	15	1.125	intron	Ack
414	chr3L	4127415	4127611	chr3L	4127415	4127611	jockey	4978	4760	17	196	11-6	63.8	2	5.66667	intron	ens
415	chr3L	4154181	4154382	chr3L	4154181	4154382	opus	10	475	15	201	10-5	66.18	0	15	exon	nab
416	chr3L	4374010	4374233	chr3L	4374010	4374233	roo	9062	8664	7	223	3-4	78.1	3	1.75	intron	DopEcR
417	chr3L	4380533	4380633	chr3L	4380533	4380633	jockey	4726	4825	7	100	4-3	75.05	2	2.33333	intergenic	DopEcR
418	chr3L	4464611	4464829	chr3L	4464611	4464829	opus	7112	478	12	218	6-6	71.61	4	2.4	intergenic	CG15024
419	chr3L	4545144	4545361	chr3L	4545144	4545361	gypsy	6989	7435	5	217	2-3	72.53	14	0.333333	intron	CG11357
420	chr3L	4616087	4616164	chr3L	4616087	4616164	flea	164	4826	11	77	3-8	80.3	0	11	intron	Src64B
421	chr3L	4730614	4730774	chr3L	4730614	4730774	hobo	38	2909	23	160	13-10	70.35	5	3.83333	intron	Gef64C
422	chr3L	4846331	4846513	chr3L	4846331	4846513	roo	396	8680	15	182	5-10	65.2	2	5	intergenic	not near genes
423	chr3L	4958135	4958334	chr3L	4958135	4958334	gypsy	7002	7430	15	199	8-7	68.84	12	1.15385	intron	Con
424	chr3L	4958999	4959225	chr3L	4958999	4959225	gypsy	458	6991	26	226	13-13	71.31	5	4.33333	intron	Con
425	chr3L	4987265	4987396	chr3L	4987265	4987396	I-element	5324	59	8	131	3-5	71.25	0	8	intron	Con
426	chr3L	5009518	5009712	chr3L	5009518	5009712	297	6967	32	13	194	8-5	67.54	5	2.16667	intron	Con
427	chr3L	5043513	5043743	chr3L	5043513	5043743	roo	8670	413	12	230	5-7	72.72	4	2.4	intron	Con
428	chr3L	5063685	5063835	chr3L	5063685	5063835	mdg3	5427	5262	13	150	6-7	67.85	5	2.16667	intron	Con
429	chr3L	5174144	5174316	chr3L	5181044	5181216	roo	395	8713	13	172	5-8	70.26	0	13	intron	shep
430	chr3L	5190546	5190702	chr3L	5197446	5197602	mdg3	5303	236	4	156	2-2	67.67	0	4	intron	shep
431	chr3L	5216161	5216304	chr3L	5223061	5223204	copia	167	4869	6	143	3-3	76.22	0	6	intron	shep
432	chr3L	5341999	5342184	chr3L	5348899	5349084	gypsy	6989	7402	15	185	9-6	68.04	8	1.66667	intron	lama
433	chr3L	5389905	5390122	chr3L	5396805	5397022	gypsy	6994	454	17	217	11-6	70.43	11	1.41667	intergenic	not near genes
434	chr3L	5431773	5431985	chr3L	5438673	5438885	hopper	1408	1403	10	212	7-3	74.06	6	1.42857	intron	CG34391
435	chr3L	5482924	5483031	chr3L	5489824	5489931	jockey	117	10	6	107	3-3	71.89	0	6	intergenic	not near genes
436	chr3L	5507185	5507353	chr3L	5514085	5514253	I-element	25	5329	9	168	7-2	64	3	2.25	intron	Lkr
437	chr3L	5755792	5756009	chr3L	5762692	5762909	Tabor	6846	7315	16	217	9-7	71.08	0	16	exon	CG10576
438	chr3L	5880358	5880547	chr3L	5887258	5887447	flea	11	4992	12	189	10-2	71.78	1	6	intergenic	not near genes
439	chr3L	6196901	6197119	chr3L	6203801	6204019	opus	7487	2	9	218	3-6	66.82	0	9	intergenic	CG8219
440	chr3L	6396285	6396503	chr3L	6403185	6403403	3S18	339	5774	13	218	7-6	63.69	9	1.3	intron	CG42747
441	chr3L	6623598	6623701	chr3L	6630498	6630601	jockey	4654	4550	13	103	9-4	76.36	4	2.6	intron	Glu-RI
442	chr3L	7009438	7009660	chr3L	7016338	7016560	roo	402	8668	11	222	4-7	72	0	11	intron	mp
443	chr3L	7069768	7069990	chr3L	7076668	7076890	roo	409	8675	12	222	2-10	68.61	8	1.33333	intron	CG8641
444	chr3L	7181404	7181618	chr3L	7188304	7188518	hobo	2938	15	8	214	6-2	76.67	1	4	intron	Dscam2
445	chr3L	7312754	7312975	chr3L	7319654	7319875	297	6586	386	8	221	2-6	71	4	1.6	intergenic	CG8607
446	chr3L	7399636	7399853	chr3L	7406536	7406753	pogo	16	2100	9	217	5-4	66.37	12	0.692308	5` UTR	pncr015:3L
447	chr3L	7430893	7431083	chr3L	7437793	7437983	gypsy	7419	6995	14	190	5-9	66.43	5	2.33333	intron	CG42458
448	chr3L	7514964	7515155	chr3L	7521864	7522055	hopper	1402	27	7	191	5-2	64.1	11	0.583333	intron	ltl
449	chr3L	7567365	7567553	chr3L	7574265	7574453	297	6606	6961	8	188	2-6	67.42	0	8	intergenic	not near genes
450	chr3L	7588545	7588751	chr3L	7595445	7595651	gypsy	6991	439	18	206	12-6	69.59	3	4.5	intron	CG33275
451	chr3L	7626350	7626580	chr3L	7633250	7633480	gypsy	4	462	18	230	13-5	68.26	0	18	intron	CG33275
452	chr3L	7641181	7641293	chr3L	7648081	7648193	1360	24	3296	9	112	3-6	75.18	0	9	intergenic	CG32373
453	chr3L	7852272	7852479	chr3L	7859172	7859379	gypsy	8	7430	26	207	15-11	71.38	16	1.52941	intergenic	not near genes
454	chr3L	7991703	7991869	chr3L	7998603	7998769	FB	29	33	6	166	3-3	68	2	2	intron	nmo
455	chr3L	8295526	8295747	chr3L	8302426	8302647	gypsy	3	7440	25	221	20-5	72.19	7	3.125	3` UTR	CG7194
456	chr3L	8440074	8440279	chr3L	8446974	8447179	gypsy	23	7444	11	205	7-4	66.97	0	11	intron	CG6983
457	chr3L	8548383	8548508	chr3L	8555283	8555408	gypsy	396	7030	8	125	3-5	64.17	3	2	intron	rhea
458	chr3L	8649438	8649667	chr3L	8656338	8656567	gypsy	6985	7444	17	229	15-2	71.77	2	5.66667	intergenic	not near genes
459	chr3L	8670040	8670144	chr3L	8676940	8677044	copia	95	225	5	104	1-4	66.66	3	1.25	intron	h
460	chr3L	8682042	8682262	chr3L	8688942	8689162	gypsy	7433	1	15	220	6-9	66.27	4	3	intergenic	not near genes
461	chr3L	8836634	8836805	chr3L	8843534	8843705	opus	163	485	19	171	8-11	71.93	10	1.72727	intron	dally
462	chr3L	9035860	9036080	chr3L	9042760	9042980	Burdock	6377	6135	11	220	3-8	71.45	6	1.57143	intron	Doc1
463	chr3L	9053858	9054072	chr3L	9060758	9060972	gypsy	8	456	16	214	10-6	68.33	0	16	intron	Argk
464	chr3L	9226960	9227170	chr3L	9233860	9234070	Stalker2	383	7248	14	210	5-9	66.86	7	1.75	intergenic	CG4483
465	chr3L	9414105	9414328	chr3L	9421005	9421228	copia	12	259	13	223	6-7	69.79	1	6.5	intron	CG3967
466	chr3L	9414454	9414674	chr3L	9421354	9421574	S-element	2	1707	6	220	4-2	74.22	16	0.352941	intron	CG3967
467	chr3L	9679414	9679531	chr3L	9686314	9686431	Quasimodo	74	7364	5	117	3-2	68.8	0	5	intron	CG6767
468	chr3L	9682538	9682762	chr3L	9689438	9689662	mdg3	249	5262	15	224	7-8	70.89	17	0.833333	exon	CG6767
469	chr3L	9803605	9803790	chr3L	9810505	9810690	roo	9026	8666	9	185	3-6	71.11	1	4.5	intergenic	CG32052
470	chr3L	9823006	9823201	chr3L	9829906	9830101	gypsy	7009	7432	19	195	11-8	64.56	5	3.16667	intron	CG43897
471	chr3L	9851283	9851501	chr3L	9858183	9858401	pogo	7	2090	7	218	5-2	74.76	12	0.538462	intron	CG10809
472	chr3L	9957407	9957615	chr3L	9964307	9964515	flea	241	4767	11	208	3-8	68.42	0	11	intron	CG34356
473	chr3L	10028666	10028747	chr3L	10035566	10035647	jockey	25	110	5	81	1-4	72.93	0	5	intron	dpr6
474	chr3L	10217517	10217746	chr3L	10224417	10224646	pogo	2096	2	14	229	3-11	66.19	0	14	intron	scramb1
475	chr3L	10384081	10384232	chr3L	10390981	10391132	roo	9060	8733	14	151	9-5	68.48	1	7	intergenic	not near genes
476	chr3L	10391385	10391609	chr3L	10398285	10398509	flea	5007	4757	20	224	9-11	71.9	1	10	intergenic	not near genes
477	chr3L	10446661	10446763	chr3L	10453561	10453663	roo	9025	82	8	102	2-6	77.67	0	8	intergenic	not near genes
478	chr3L	10523165	10523307	chr3L	10530065	10530207	gypsy	7362	6992	15	142	7-8	74.71	7	1.875	intron	A2bp1
479	chr3L	10752488	10752925	chr3L	10759388	10759825	gypsy	7443	7393	13	437	1-12	70.31	14	0.866667	intergenic	not near genes
480	chr3L	10823732	10823872	chr3L	10830632	10830772	copia	4870	164	5	140	3-2	73.33	0	5	intergenic	not near genes
481	chr3L	10886952	10887173	chr3L	10893852	10894073	412	12	494	15	221	4-11	69.56	11	1.25	intergenic	Cpr67Fa2
482	chr3L	10907632	10907834	chr3L	10914532	10914734	412	7082	491	16	202	5-11	67.25	8	1.77778	intergenic	not near genes
483	chr3L	10908050	10908267	chr3L	10914950	10915167	gypsy	6985	451	15	217	10-5	65.91	13	1.07143	intergenic	not near genes
484	chr3L	11151583	11151801	chr3L	11158483	11158701	Stalker2	7255	7643	14	218	6-8	66.48	1	7	intron	CG32082
485	chr3L	11180871	11181036	chr3L	11187771	11187936	jockey	35	4934	8	165	3-5	72.58	2	2.66667	intron	GlcAT-P
486	chr3L	11208746	11208964	chr3L	11215646	11215864	P-element	25	2883	15	218	5-10	46.58	3	3.75	intron	CG42671
487	chr3L	11341592	11341663	chr3L	11348492	11348563	I-element	27	93	5	71	3-2	65.2	0	5	intergenic	not near genes
488	chr3L	11446578	11446753	chr3L	11453478	11453653	297	6603	6954	10	175	2-8	62.73	0	10	intergenic	not near genes
489	chr3L	11513873	11514066	chr3L	11520773	11520966	roo	8661	9036	14	193	6-8	69.43	0	14	5` UTR	Fuca
490	chr3L	11514339	11514538	chr3L	11521239	11521438	17.6	478	6942	17	199	4-13	70.86	0	17	3` UTR	CG11714
491	chr3L	11526047	11526259	chr3L	11532947	11533159	gypsy	6996	453	9	212	8-1	71.33	0	9	intron	Mob2
492	chr3L	11528016	11528100	chr3L	11534916	11535000	jockey	106	22	6	84	4-2	67.67	0	6	intron	Mob2
493	chr3L	11529941	11530093	chr3L	11536841	11536993	hobo	2865	4	15	152	8-7	75.16	2	5	intron	Mob2
494	chr3L	11535944	11536173	chr3L	11542844	11543073	gypsy	461	7	16	229	9-7	69.92	1	8	intron	Mob2
495	chr3L	11582236	11582459	chr3L	11589136	11589359	Transpac	310	10	19	223	11-8	71.05	0	19	intergenic	rt
496	chr3L	11587839	11588045	chr3L	11594739	11594945	mdg3	5489	17	7	206	5-2	72.48	1	3.5	intergenic	CG7368
497	chr3L	11830773	11831072	chr3L	11837673	11837972	G5A	2744	2673	8	299	4-4	67.58	15	0.5	intergenic	CG43064
498	chr3L	11870844	11871062	chr3L	11877744	11877962	3S18	342	14	13	218	4-9	67.28	6	1.85714	intergenic	CG14128
499	chr3L	11978938	11979155	chr3L	11985838	11986055	Tabor	7321	13	21	217	8-13	68.6	12	1.61538	intron	CG6938
500	chr3L	12010374	12010596	chr3L	12017274	12017496	gypsy	1	7443	17	222	8-9	71.45	0	17	intron	rols
501	chr3L	12068690	12068902	chr3L	12075590	12075802	pogo	7	2087	10	212	4-6	66.06	0	10	intron	Sema-5c
502	chr3L	12072275	12072479	chr3L	12079175	12079379	mdg1	401	7048	10	204	8-2	65	2	3.33333	intron	Sema-5c
503	chr3L	12158252	12158477	chr3L	12165152	12165377	micropia	451	4	13	225	7-6	69.03	3	3.25	3` UTR	Rh7
504	chr3L	12180390	12180579	chr3L	12187290	12187479	rover	6968	7271	4	189	1-3	68.33	2	1.33333	3` UTR	CG6910
505	chr3L	12224209	12224424	chr3L	12231109	12231324	roo	4	9059	15	215	8-7	70.98	18	0.789474	intron	app
506	chr3L	12293157	12293319	chr3L	12300057	12300219	1360	13	2	13	162	11-2	60.92	0	13	intergenic	not near genes
507	chr3L	12352631	12352705	chr3L	12359531	12359605	jockey	4760	4687	11	74	3-8	62.79	0	11	intergenic	not near genes
508	chr3L	12642077	12642293	chr3L	12648977	12649193	roo	13	405	9	216	4-5	67.19	13	0.642857	intergenic	CG32111
509	chr3L	12694969	12695168	chr3L	12701869	12702068	gypsy	6991	7419	23	199	13-10	70.99	10	2.09091	intron	mirr
510	chr3L	12718143	12718364	chr3L	12725043	12725264	gypsy	6985	448	17	221	11-6	70.27	0	17	intergenic	not near genes
511	chr3L	12793771	12793880	chr3L	12800671	12800780	copia	15	149	5	109	4-1	69.07	0	5	intron	Atg1
512	chr3L	12856725	12856938	chr3L	12863625	12863838	Transpac	10	5222	16	213	7-9	67.58	12	1.23077	intergenic	CG32107
513	chr3L	12940062	12940241	chr3L	12946962	12947141	297	6936	15	10	179	5-5	67.13	12	0.769231	intergenic	not near genes
514	chr3L	12958468	12958650	chr3L	12965368	12965550	hobo	2917	26	15	182	6-9	67.78	6	2.14286	intron	Or69a
515	chr3L	13015246	13015474	chr3L	13022146	13022374	gtwin	473	6919	16	228	7-9	70.04	13	1.14286	intron	CG11255
516	chr3L	13137464	13137665	chr3L	13144364	13144565	flea	10	233	9	201	8-1	72.81	0	9	intergenic	not near genes
517	chr3L	13173722	13173841	chr3L	13180622	13180741	mdg1	7148	417	9	119	3-6	71.26	0	9	intergenic	not near genes
518	chr3L	13286953	13287027	chr3L	13293853	13293927	mdg3	5428	247	8	74	4-4	65.67	0	8	intergenic	CR43912
519	chr3L	13314578	13314803	chr3L	13321478	13321703	gypsy	6995	462	19	225	12-7	70.18	8	2.11111	intergenic	not near genes
520	chr3L	13332742	13332809	chr3L	13339642	13339709	copia	250	5052	4	67	1-3	65	0	4	intergenic	not near genes
521	chr3L	13335907	13336047	chr3L	13342807	13342947	I-element	5285	16	6	140	4-2	67.78	6	0.857143	intergenic	not near genes
522	chr3L	13358105	13358294	chr3L	13365005	13365194	Juan	4182	10	4	189	2-2	70.67	4	0.8	intergenic	not near genes
523	chr3L	13452445	13452545	chr3L	13459345	13459445	Doc	8	108	7	100	3-4	74.47	0	7	intron	CG10738
524	chr3L	13574901	13575112	chr3L	13581801	13582012	hobo	7	2929	21	211	15-6	68.95	0	21	intron	bru-3
525	chr3L	13609936	13610148	chr3L	13616836	13617048	hobo	2931	9	22	212	11-11	67.12	5	3.66667	intron	bru-3
526	chr3L	13647229	13647436	chr3L	13654129	13654336	hobo	3	2921	20	207	12-8	71.4	9	2	intron	bru-3
527	chr3L	13681782	13681911	chr3L	13688682	13688811	Stalker4	6982	333	4	129	1-3	73.33	3	1	intron	bru-3
528	chr3L	13681786	13681921	chr3L	13688686	13688821	Stalker	30	342	8	135	3-5	68.58	3	2	intron	bru-3
529	chr3L	13724383	13724607	chr3L	13731283	13731507	Burdock	6145	6390	21	224	11-10	74.41	11	1.75	intron	bru-3
530	chr3L	13750795	13750948	chr3L	13757695	13757848	roo	22	351	13	153	7-6	70.05	1	6.5	intron	bru-3
531	chr3L	14232507	14232751	chr3L	14239407	14239651	mdg1	7457	7042	9	244	4-5	67.11	4	1.8	intergenic	CG7906
532	chr3L	14292498	14292573	chr3L	14299398	14299473	F-element	114	38	9	75	3-6	64.3	0	9	intron	fz
533	chr3L	14313930	14314020	chr3L	14320830	14320920	Doc	105	15	7	90	2-5	71.14	0	7	intron	fz
534	chr3L	14331811	14332010	chr3L	14338711	14338910	gypsy	7001	441	13	199	6-7	68.97	11	1.08333	intron	fz
535	chr3L	14355989	14356195	chr3L	14362889	14363095	gypsy	9	443	19	206	10-9	70	3	4.75	intron	fz
536	chr3L	14511448	14511618	chr3L	14518348	14518518	roo	397	50	7	170	2-5	74.76	0	7	intron	bbg
537	chr3L	14634109	14634282	chr3L	14641009	14641182	roo	9049	33	9	173	2-7	64.67	4	1.8	intron	dlp
538	chr3L	14717648	14717850	chr3L	14724548	14724750	mdg3	5498	29	18	202	11-7	74.93	0	18	intron	ome
539	chr3L	14752791	14753002	chr3L	14759691	14759902	gypsy	457	17	15	211	7-8	71.38	0	15	intergenic	CG42507
540	chr3L	14812525	14812698	chr3L	14819425	14819598	pogo	27	2078	10	173	9-1	65.2	0	10	intron	CG17839
541	chr3L	14875802	14876015	chr3L	14882702	14882915	hobo	2937	19	18	213	4-14	70.59	0	18	intergenic	CG17839
542	chr3L	14894104	14894284	chr3L	14901004	14901184	roo	14	9035	7	180	4-3	71.24	4	1.4	intergenic	DCX-EMAP
543	chr3L	14963143	14963232	chr3L	14970043	14970132	297	6860	6948	7	89	3-4	71.91	2	2.33333	3` UTR	Tom
544	chr3L	15219521	15219718	chr3L	15226421	15226618	Transpac	5223	28	8	197	5-3	65.41	1	4	intergenic	not near genes
545	chr3L	15263138	15263269	chr3L	15270038	15270169	gypsy	417	7045	8	131	4-4	65.25	1	4	intergenic	not near genes
546	chr3L	15321335	15321521	chr3L	15328235	15328421	HMS-Beagle2	274	6892	15	186	6-9	68.76	6	2.14286	intergenic	not near genes
547	chr3L	15372747	15372969	chr3L	15379647	15379869	pogo	2091	3	5	222	4-1	76.93	3	1.25	intergenic	not near genes
548	chr3L	15441638	15441787	chr3L	15448538	15448687	I-element	5334	50	7	149	2-5	71.62	4	1.4	intergenic	not near genes
549	chr3L	15494845	15495007	chr3L	15501745	15501907	1360	3358	27	9	162	6-3	59.19	0	9	intron	CG7272
550	chr3L	15635228	15635300	chr3L	15642128	15642200	jockey	4980	4909	8	72	6-2	67.83	0	8	intron	comm3
551	chr3L	16005349	16005564	chr3L	16012249	16012464	HMS-Beagle	237	6804	15	215	9-6	73.07	7	1.875	intergenic	mib1
552	chr3L	16130337	16130477	chr3L	16137237	16137377	Juan	4033	4148	6	140	3-3	73.22	7	0.75	5` UTR	CG5157
553	chr3L	16238783	16238951	chr3L	16245683	16245851	roo	9028	20	4	168	2-2	70.83	0	4	intergenic	not near genes
554	chr3L	16255833	16256045	chr3L	16262733	16262945	Transpac	4923	292	16	212	8-8	72.46	12	1.23077	intergenic	CG34247
555	chr3L	16386303	16386393	chr3L	16393203	16393293	3S18	252	341	6	90	2-4	75.22	0	6	intergenic	RAF2
556	chr3L	16428708	16428905	chr3L	16435608	16435805	gypsy	7024	463	12	197	6-6	75.67	13	0.857143	intron	CG33158
557	chr3L	16456174	16456360	chr3L	16463074	16463260	roo	8	9034	7	186	4-3	64.28	0	7	intron	CG33158
558	chr3L	16477057	16477209	chr3L	16483957	16484109	Juan	4156	4033	10	152	3-7	72.73	0	10	intron	CG33158
559	chr3L	16554494	16554704	chr3L	16561394	16561604	roo	8662	386	15	210	7-8	69.64	1	7.5	intergenic	Mipp1
560	chr3L	16637982	16638184	chr3L	16644882	16645084	roo	6	9049	12	202	8-4	75.61	0	12	intron	Abl
561	chr3L	16649918	16650087	chr3L	16656818	16656987	gypsy	65	462	10	169	6-4	70.2	0	10	intron	Baldspot
562	chr3L	16655526	16655625	chr3L	16662426	16662525	jockey	4869	4770	5	99	2-3	73.47	0	5	intergenic	Baldspot
563	chr3L	16692236	16692470	chr3L	16699136	16699370	gypsy	1	463	18	234	12-6	72.37	7	2.25	intron	Lasp
564	chr3L	16718561	16718747	chr3L	16725461	16725647	opus	28	7482	14	186	9-5	70.43	0	14	intergenic	Dab
565	chr3L	16809118	16809347	chr3L	16816018	16816247	gypsy	6985	7446	17	229	13-4	65.22	0	17	intron	nudC
566	chr3L	16816465	16816683	chr3L	16823365	16823583	roo	14	411	14	218	8-6	65.05	3	3.5	intron	CG13024
567	chr3L	16867046	16867266	chr3L	16873946	16874166	gypsy	458	9	16	220	10-6	75.13	18	0.842105	intron	Lmpt
568	chr3L	16880061	16880251	chr3L	16886961	16887151	roo	9047	14	6	190	2-4	69.55	0	6	intron	Lmpt
569	chr3L	16912782	16913003	chr3L	16919682	16919903	R1A1-element	4880	5332	20	221	9-11	72.2	10	1.81818	intron	Lmpt
570	chr3L	17046796	17046975	chr3L	17053696	17053875	pogo	53	2098	12	179	4-8	68.56	0	12	intron	rogdi
571	chr3L	17094826	17094918	chr3L	17101726	17101818	X-element	9	101	9	92	3-6	67.04	1	4.5	intron	Rbp6
572	chr3L	17106389	17106600	chr3L	17113289	17113500	pogo	6	2082	12	211	4-8	65.17	2	4	intron	Rbp6
573	chr3L	17132109	17132334	chr3L	17139009	17139234	roo	8665	403	12	225	6-6	71.5	3	3	intron	Rbp6
574	chr3L	17165755	17165979	chr3L	17172655	17172879	roo	411	12	12	224	6-6	75.39	0	12	intron	Rbp6
575	chr3L	17171290	17171499	chr3L	17178190	17178399	3S18	5784	6101	8	209	3-5	74.58	3	2	intron	Rbp6
576	chr3L	17290707	17290875	chr3L	17297607	17297775	roo	400	54	9	168	6-3	70.3	13	0.642857	intergenic	not near genes
577	chr3L	17345420	17345624	chr3L	17352320	17352524	412	488	7074	10	204	4-6	68.73	1	5	intergenic	Mip
578	chr3L	17437050	17437251	chr3L	17443950	17444151	opus	484	17	16	201	4-12	72.08	3	4	intron	CG18265
579	chr3L	17495561	17495777	chr3L	17502461	17502677	gypsy	15	461	25	216	17-8	71.71	8	2.77778	intron	Oatp74D
580	chr3L	17735484	17735669	chr3L	17742384	17742569	mdg1	18	388	4	185	2-2	59.17	0	4	intron	Ccn
581	chr3L	17757502	17757632	chr3L	17764402	17764532	gypsy	7072	443	4	130	2-2	77.17	0	4	intergenic	Adgf-A
582	chr3L	17761156	17761375	chr3L	17768056	17768275	Quasimodo	3	7356	11	219	8-3	72.06	1	5.5	intergenic	not near genes
583	chr3L	17871186	17871412	chr3L	17878086	17878312	roo	407	8669	9	226	5-4	70.52	10	0.818182	intergenic	CG7408
584	chr3L	17916857	17917042	chr3L	17923757	17923942	I-element	18	5333	11	185	3-8	72.73	11	0.916667	intergenic	not near genes
585	chr3L	18182451	18182657	chr3L	18189351	18189557	gypsy	7446	7009	18	206	8-10	66.3	0	18	intergenic	not near genes
586	chr3L	18184475	18184660	chr3L	18191375	18191560	gypsy	7407	6	9	185	2-7	70.74	0	9	intergenic	not near genes
587	chr3L	18189025	18189225	chr3L	18195925	18196125	gypsy	19	7440	19	200	7-12	67.75	14	1.26667	intergenic	not near genes
588	chr3L	18456450	18456549	chr3L	18463350	18463449	gypsy5	414	316	5	99	1-4	68.13	1	2.5	intergenic	CG32196
589	chr3L	18498821	18498920	chr3L	18505721	18505820	jockey	108	9	4	99	2-2	74.67	2	1.33333	intergenic	not near genes
590	chr3L	18503460	18503676	chr3L	18510360	18510576	roo	393	1	18	216	5-13	69.19	13	1.28571	intergenic	not near genes
591	chr3L	18548960	18549186	chr3L	18555860	18556086	opus	2	494	7	226	2-5	82.1	3	1.75	intergenic	not near genes
592	chr3L	18625617	18625685	chr3L	18632517	18632585	FB	20	87	4	68	1-3	68	0	4	intron	MYPT-75D
593	chr3L	18636958	18637098	chr3L	18643858	18643998	FB	41	47	6	140	4-2	58	0	6	intron	MYPT-75D
594	chr3L	18717060	18717263	chr3L	18723960	18724163	297	6964	20	8	203	6-2	68.83	5	1.33333	5` UTR	CR43985
595	chr3L	18729897	18730017	chr3L	18736797	18736917	roo	24	8984	12	120	10-2	64.11	3	3	intergenic	not near genes
596	chr3L	18734982	18735117	chr3L	18741882	18742017	Ivk	5317	26	7	135	2-5	62.95	0	7	intergenic	CG6885
597	chr3L	18839189	18839338	chr3L	18846089	18846238	17.6	6953	7361	8	149	6-2	67.33	0	8	5` UTR	Indy
598	chr3L	18988175	18988365	chr3L	18995075	18995265	S-element	1700	1687	9	190	5-4	69.7	5	1.5	intron	CG18135
599	chr3L	19105876	19106102	chr3L	19112776	19113002	blood	7010	378	29	226	15-14	67.45	17	1.61111	intron	CG14082
600	chr3L	19156427	19156626	chr3L	19163327	19163526	gypsy	22	7436	17	199	9-8	65.1	13	1.21429	intron	fz2
601	chr3L	19174376	19174547	chr3L	19181276	19181447	I-element	18	5324	5	171	2-3	70	0	5	intron	fz2
602	chr3L	19185275	19185412	chr3L	19192175	19192312	gypsy	7434	82	19	137	10-9	70.35	4	3.8	intron	fz2
603	chr3L	19191882	19192108	chr3L	19198782	19199008	gypsy	451	8	21	226	7-14	61.36	10	1.90909	intron	fz2
[truncated: 593 more rows]

## Sheet: OSC_E_TE_Inserts
Table S4. De novo TE insertions in Drosophila gonadal cell cultures. Tab: OSC_E_TE_Inserts
[truncated: 1,145 more rows]
