# Supplementary material for: Transposable element dynamics and PIWI regulation impacts lncRNA and gene expression diversity in Drosophila ovarian cell cultures
Source: HighWire-hosted journal article supplement (doi:10.1101/gr.178129.114), 2014-09-29
Supplement: Supplemental_Tables_S1_S6.zip [file TableS5_OSS_OSC_lncRNAs_0924.xlsx]

## Sheet: OSS_C_TE-linked_lncRNAs
Table S5. TE-associated LncRNAs in Drosophila gonadal cell cultures. Tab: OSS_C_TE-linked lncRNAs
lncRNA#	lncRNA locus descriptor	# TEs	First TE	Last TE	Length	Release 5 Genome Coordinates	Release 6 Genome Coordinates	Strand	PIWI CLIP-Seq tags (RPMs, avg)	siGFP Nascent RNA (RPMs)	siPiwi Nascent RNA (RPMs)
1	chr2L_Cda5 -	1	ZAM	ZAM	42172	chr2L:24163-66335	chr2L:24,163-66,335	+	30.546	396.535	478.724
2	chr2L_CG4297 -	2	copia	ZAM	6420	chr2L:465266-471686	chr2L:465,266-471,686	+	9.137	48.94	40.073
3	chr2L_ds -	5	412	ZAM	29999	chr2L:607025-637024	chr2L:607,025-637,024	-	2.8065	52.919	250.843
4	chr2L_not near genes_723	2	ZAM	ZAM	13972	chr2L:722349-736321	chr2L:722,349-736,321	+	6.85624	65.3229	59.683
5	chr2L_GABA-B-R3 +	1	ZAM	ZAM	3426	chr2L:755454-758880	chr2L:755,454-758,880	-	17.5677	18.107	9.369
6	chr2L_not near genes_986	1	ZAM	ZAM	4713	chr2L:985805-990518	chr2L:985,805-990,518	+	1.77425	13.101	8.675
7	chr2L_haf +	1	gypsy	gypsy	45327	chr2L:1563329-1608656	chr2L:1,563,329-1,608,656	+	1.6245	513.708	300.458
8	chr2L_not near genes_164	1	mdg1	mdg1	24701	chr2L:1619814-1644515	chr2L:1,619,814-1,644,515	-	5.3965	186.281	108.27
9	chr2L_chinmo +	1	accord	accord	6252	chr2L:1691670-1697922	chr2L:1,691,670-1,697,922	-	1.15725	8.668	12.839
10	chr2L_not near genes_321	1	mdg3	412	24582	chr2L:3209278-3233860	chr2L:3,209,278-3,233,860	-	14.4695	279.995	368.965
11	chr2L_CG34175 +	3	ZAM	gypsy6	6181	chr2L:3389031-3395212	chr2L:3,389,031-3,395,212	-	14.667	66.67	56.207
12	chr2L_drm +	1	ZAM	ZAM	17726	chr2L:3536113-3553839	chr2L:3,536,113-3,553,839	-	8.179	32.399	15.268
13	chr2L_CG3921 +	1	ZAM	ZAM	12599	chr2L:3774540-3787139	chr2L:3,774,540-3,787,139	-	10.0945	18.106	20.587
14	chr2L_fred -	1	ZAM	ZAM	72294	chr2L:3888270-3960564	chr2L:3,888,270-3,960,564	+	10.9215	151.463	169.52
15	chr2L_CG16857 +	1	ZAM	ZAM	15606	chr2L:4312284-4327890	chr2L:4,312,284-4,327,890	-	2.36275	18.528	24.839
16	chr2L_CG31646 -	1	ZAM	ZAM	5954	chr2L:5656715-5662669	chr2L:5,656,715-5,662,669	+	6.153	47.012	35.739
17	chr2L_Acp26Aa -	1	springer	ZAM	8798	chr2L:5891483-5900281	chr2L:5,891,483-5,900,281	+	30.6812	82.084	56.209
18	chr2L_Proct -	1	ZAM	ZAM	16283	chr2L:7871048-7887331	chr2L:7,871,048-7,887,331	+	6.233	24.918	13.412
19	chr2L_poe -	1	Quasimodo	Quasimodo	11385	chr2L:8071715-8083100	chr2L:8,071,715-8,083,100	+	5.2165	24.272	70.261
20	chr2L_Sema-1a +	2	springer	ZAM	2218	chr2L:8528572-8530790	chr2L:8,528,572-8,530,790	-	0.66475	11.174	10.757
21	chr2L_not near genes_931	1	ZAM	ZAM	5495	chr2L:9305127-9310622	chr2L:9,305,127-9,310,622	-	4.415	12.712	5.899
22	chr2L_CG4382 -	1	ZAM	ZAM	11210	chr2L:9597312-9608522	chr2L:9,597,312-9,608,522	+	35.205	60.497	49.443
23	chr2L_CR44150 -	1	ZAM	ZAM	11309	chr2L:9666759-9678068	chr2L:9,666,759-9,678,068	+	8.8265	18.512	13.62
24	chr2L_CG44153 -	2	ZAM	ZAM	3112	chr2L:10071958-10075070	chr2L:10,071,958-10,075,070	+	6.00475	30.062	21.164
25	chr2L_Trim9 +	4	ZAM	ZAM	47522	chr2L:10569728-10617250	chr2L:10,569,728-10,617,250	-	78.3602	485.251	303.501
26	chr2L_not near genes_116	1	ZAM	ZAM	5083	chr2L:11689761-11694844	chr2L:11,689,761-11,694,844	+	10.6907	38.532	23.94
27	chr2L_not near genes_117	1	ZAM	ZAM	8855	chr2L:11692860-11701715	chr2L:11,692,860-11,701,715	-	15.756	85.263	75.203
28	chr2L_aret +	2	mdg3	springer	21431	chr2L:12226034-12247465	chr2L:12,226,034-12,247,465	-	5.17725	60.8309	54.733
29	chr2L_not near genes_127	2	Quasimodo	Burdock	27602	chr2L:12754205-12781807	chr2L:12,754,205-12,781,807	+	1.21575	26.066	341.776
30	chr2L_CR43818 -	2	ZAM	ZAM	27617	chr2L:12794820-12822437	chr2L:12,794,820-12,822,437	+	1.373	20.515	84.098
31	chr2L_not near genes_128	1	ZAM	ZAM	29165	chr2L:12881350-12910515	chr2L:12,881,350-12,910,515	+	0.26575	5.915	49.551
32	chr2L_not near genes_130	2	ZAM	ZAM	44999	chr2L:13068205-13113204	chr2L:13,068,205-13,113,204	-	12.0092	493.875	297.109
33	chr2L_CG31851 +	1	Juan	Juan	7156	chr2L:13255260-13262416	chr2L:13,255,260-13,262,416	-	4.799	15.489	28.453
34	chr2L_not near genes_144	2	opus	opus	25690	chr2L:14462772-14488462	chr2L:14,462,772-14,488,462	+	2.1105	37.396	30.367
35	chr2L_not near genes_145	2	ZAM	copia	67499	chr2L:14496127-14563626	chr2L:14,496,127-14,563,626	+	12.8627	122.286	114.084
36	chr2L_not near genes_148	1	297	297	12195	chr2L:14851818-14864013	chr2L:14,851,818-14,864,013	-	0.3825	52.801	86.765
37	chr2L_not near genes_153	4	ZAM	ZAM	3070	chr2L:15391189-15394259	chr2L:15,391,189-15,394,259	+	7.5705	25.915	19.084
38	chr2L_beat-Ia +	2	roo	ZAM	18719	chr2L:16051030-16069749	chr2L:16,051,030-16,069,749	-	36.253	180.74	116.586
39	chr2L_not near genes_170	1	mdg1	mdg1	13188	chr2L:17053533-17066721	chr2L:17,053,533-17,066,721	-	3.2175	57.408	37.881
40	chr2L_not near genes_172	2	ZAM	ZAM	10682	chr2L:17262800-17273482	chr2L:17,262,800-17,273,482	-	9.98375	65.892	62.62
41	chr2L_Dhc36C +	1	springer	springer	14340	chr2L:17501595-17515935	chr2L:17,501,595-17,515,935	-	29.4732	299.465	320.922
42	chr2L_CadN -	2	jockey	jockey	15008	chr2L:17636962-17651970	chr2L:17,636,962-17,651,970	+	11.9415	91.3281	61.833
43	chr2L_CadN2 -	1	ZAM	ZAM	45457	chr2L:17834695-17880152	chr2L:17,834,695-17,880,152	+	11.2513	95.7831	79.086
44	chr2L_Fas3 +	2	springer	springer	26775	chr2L:18349874-18376649	chr2L:18,349,874-18,376,649	+	0	196.263	258.482
45	chr2L_kon -	1	ZAM	ZAM	17513	chr2L:18486838-18504351	chr2L:18,486,838-18,504,351	+	0.71525	15.293	30.173
46	chr2L_CG10178 +	1	ZAM	ZAM	4608	chr2L:18508630-18513238	chr2L:18,508,630-18,513,238	-	8.52875	23.116	12.145
47	chr2L_Lar +	1	springer	springer	22499	chr2L:19620176-19642675	chr2L:19,620,176-19,642,675	-	6.06925	60.114	37.515
48	chr2L_CG9316 -	1	mdg1	mdg1	12503	chr2L:20721566-20734069	chr2L:20,721,566-20,734,069	+	15.874	132.507	117.358
49	chr2L_CG42238 -	3	Tirant	springer	26820	chr2L:20981197-21008017	chr2L:20,981,197-21,008,017	+	8.17474	93.4481	76.486
50	chr2L_not near genes_216	1	mdg3	mdg3	7079	chr2L:21604496-21611575	chr2L:21,604,496-21,611,575	-	1.2445	82.77	76.854
51	chr2L_not near genes_218	2	ZAM	ZAM	7938	chr2L:21863231-21871169	chr2L:21,863,231-21,871,169	+	6.0555	67.727	71.037
52	chr2R_CG17883 +	1	Quasimodo	Quasimodo	3528	chr2R:557629-561157	chr2R:4,670,124-4,673,652	-	0.73275	5.007	67.307
53	chr2R_not near genes_742	1	copia	copia	14803	chr2R:733461-748264	chr2R:4,845,956-4,860,759	+	5.51625	65.443	71.378
54	chr2R_CG30438 +	1	1360	1360	22499	chr2R:1402546-1425045	chr2R:5,515,041-5,537,540	-	7.38375	153.36	137.067
55	chr2R_dpr12 +	2	mdg3	ZAM	25087	chr2R:1676954-1702041	chr2R:5,789,449-5,814,536	-	3.39025	41.984	47.538
56	chr2R_Ars2 -	3	opus	297	12449	chr2R:1974641-1987090	chr2R:6,087,136-6,099,585	+	4.5495	21.957	61.251
57	chr2R_Pld +	1	roo	roo	30734	chr2R:2118834-2149568	chr2R:6,231,329-6,262,063	-	31.194	382.402	278.229
58	chr2R_not near genes_273	1	ZAM	ZAM	15582	chr2R:2732471-2748053	chr2R:6,844,966-6,860,548	+	7.017	40.067	37.474
59	chr2R_Tsp42Ea +	1	springer	springer	6465	chr2R:2873599-2880064	chr2R:6,986,094-6,992,559	-	2.90175	25.625	21.166
60	chr2R_esn +	2	ZAM	flea	12184	chr2R:2964384-2976568	chr2R:7,076,879-7,089,063	-	8.32875	21.189	17.003
61	chr2R_not near genes_420	2	ZAM	HMS-Beagle	3165	chr2R:4204250-4207415	chr2R:8,316,745-8,319,910	+	1.12525	8.476	11.451
62	chr2R_CG42326 -	1	ZAM	ZAM	11371	chr2R:4466256-4477627	chr2R:8,578,751-8,590,122	+	0.602	20.156	26.545
63	chr2R_not near genes_453	2	Doc2-element	Doc2-element	10328	chr2R:4520110-4530438	chr2R:8,632,605-8,642,933	-	16.7385	110.873	96.453
64	chr2R_brp +	1	ZAM	ZAM	52644	chr2R:5376468-5429112	chr2R:9,488,963-9,541,607	-	21.0307	449.778	360.412
65	chr2R_CG30002 +	1	ZAM	ZAM	5252	chr2R:5588167-5593419	chr2R:9,700,662-9,705,914	+	21.4217	110.999	95.063
66	chr2R_dap +	1	springer	springer	16686	chr2R:5582362-5599048	chr2R:9,694,857-9,711,543	-	23.4187	140.647	110.337
67	chr2R_lola -	3	copia	copia	22140	chr2R:6403928-6426068	chr2R:10,516,423-10,538,563	+	0.36375	17.742	34.125
68	chr2R_not near genes_655	1	ZAM	ZAM	13295	chr2R:6553570-6566865	chr2R:10,666,065-10,679,360	+	9.835	142.399	136.175
69	chr2R_luna -	4	ZAM	ZAM	27061	chr2R:6861591-6888652	chr2R:10,974,086-11,001,147	+	5.63275	20.899	32.272
70	chr2R_CG30049 +	2	ZAM	17.6	10106	chr2R:8232201-8242307	chr2R:12,344,696-12,354,802	-	26.8165	220.067	215.45
71	chr2R_CG8501 +	1	ZAM	ZAM	4997	chr2R:8268224-8273221	chr2R:12,380,719-12,385,716	-	0.11625	1.54	18.39
72	chr2R_not near genes_899	1	mdg1	mdg1	20213	chr2R:8996375-9016588	chr2R:13,108,870-13,129,083	+	9.571	260.849	199.31
73	chr2R_CG6280 +	2	ZAM	ZAM	6011	chr2R:9641146-9647157	chr2R:13,753,641-13,759,652	+	4.34275	36.991	30.188
74	chr2R_CG43729 +	3	mdg3	ZAM	17488	chr2R:11283827-11301315	chr2R:15,396,322-15,413,810	-	38.9465	265.152	181.118
75	chr2R_CG42524 +	1	springer	springer	43293	chr2R:11461901-11505194	chr2R:15,574,396-15,617,689	-	3.52125	106.719	165.041
76	chr2R_sli -	1	ZAM	ZAM	29999	chr2R:11757728-11787727	chr2R:15,870,223-15,900,222	+	3.676	22.847	24.116
77	chr2R_not near genes_119	1	ZAM	ZAM	7748	chr2R:11952757-11960505	chr2R:16,065,252-16,073,000	-	10.7322	14.637	12.492
78	chr2R_Jhe +	1	mdg1	mdg1	2149	chr2R:12010266-12012415	chr2R:16,122,761-16,124,910	+	1.434	188.865	161.317
79	chr2R_spin +	1	springer	springer	31066	chr2R:11999765-12030831	chr2R:16,112,260-16,143,326	-	34.5345	74.485	85.013
80	chr2R_CG4409 +	1	ZAM	ZAM	23886	chr2R:12306156-12330042	chr2R:16,418,651-16,442,537	-	9.57875	58.953	57.15
81	chr2R_not near genes_123	1	ZAM	ZAM	20024	chr2R:12341248-12361272	chr2R:16,453,743-16,473,767	+	22.8077	82.9921	66.649
82	chr2R_Syn2 +	1	ZAM	ZAM	6682	chr2R:12432268-12438950	chr2R:16,544,763-16,551,445	-	15.9217	26.198	14.921
83	chr2R_Alk -	1	ZAM	ZAM	6066	chr2R:12521016-12527082	chr2R:16,633,511-16,639,577	+	14.2995	22.761	17.697
84	chr2R_mbl +	1	I-element	I-element	11421	chr2R:13132844-13144265	chr2R:17,245,339-17,256,760	-	5.188	31.588	22.208
85	chr2R_CG10936 -	2	ZAM	ZAM	20806	chr2R:13509292-13530098	chr2R:17,621,787-17,642,593	+	1.40625	9.703	49.426
86	chr2R_CG30108 +	1	ZAM	ZAM	4273	chr2R:13552941-13557214	chr2R:17,665,436-17,669,709	-	1.44775	14.64	16.655
87	chr2R_olf186-F +	2	mdg3	springer	62808	chr2R:13676504-13739312	chr2R:17,788,999-17,851,807	-	17.795	195.803	151.347
88	chr2R_dpr13 -	2	ZAM	ZAM	5814	chr2R:13872912-13878726	chr2R:17,985,407-17,991,221	+	10.7497	34.595	24.15
89	chr2R_not near genes_139	1	ZAM	ZAM	33341	chr2R:13896276-13929617	chr2R:18,008,771-18,042,112	-	77.7463	497.547	343.953
90	chr2R_CG30114 +	2	ZAM	ZAM	8578	chr2R:14084848-14093426	chr2R:18,197,343-18,205,921	-	15.1115	28.94	12.184
91	chr2R_not near genes_141	2	ZAM	ZAM	52891	chr2R:14103901-14156792	chr2R:18,216,396-18,269,287	+	35.498	166.449	96.75
92	chr2R_GEFmeso -	1	mdg1	mdg1	20332	chr2R:14441853-14462185	chr2R:18,554,348-18,574,680	+	3.98	62.4749	44.587
93	chr2R_CG10737 +	1	ZAM	ZAM	29999	chr2R:15032714-15062713	chr2R:19,145,209-19,175,208	-	5.67025	18.553	22.554
94	chr2R_Or56a -	1	ZAM	ZAM	6398	chr2R:15657094-15663492	chr2R:19,769,589-19,775,987	+	13.2012	33.911	33.322
95	chr2R_not near genes_158	3	ZAM	ZAM	17109	chr2R:15816005-15833114	chr2R:19,928,500-19,945,609	+	21.2327	57.4099	36.782
96	chr2R_CG10822 +	1	ZAM	ZAM	4286	chr2R:15834290-15838576	chr2R:19,946,785-19,951,071	-	12.5687	23.889	11.104
97	chr2R_not near genes_159	6	ZAM	ZAM	98425	chr2R:15899242-15997667	chr2R:20,011,737-20,110,162	+	32.0277	540.146	311.675
98	chr2R_not near genes_160	4	ZAM	springer	29999	chr2R:16038616-16068615	chr2R:20,151,111-20,181,110	+	25.6285	56.6369	33.312
99	chr2R_CG16894 -	1	ZAM	ZAM	9999	chr2R:16095221-16105220	chr2R:20,207,716-20,217,715	+	12.125	22.142	14.787
100	chr2R_not near genes_162	1	mdg3	mdg3	44999	chr2R:16265183-16310182	chr2R:20,377,678-20,422,677	+	0.874	27.344	30.883
101	chr2R_CG43667 -	1	springer	springer	2962	chr2R:16677579-16680541	chr2R:20,790,074-20,793,036	+	4.52775	17.724	17.072
102	chr2R_CG30222 +	1	mdg1	mdg1	4132	chr2R:17473708-17477840	chr2R:21,586,203-21,590,335	+	4.791	10.016	9.485
103	chr2R_CG30271 +	1	ZAM	ZAM	8009	chr2R:18695966-18703975	chr2R:22,808,461-22,816,470	-	14.6467	32.747	31.573
104	chr2R_RpL37b -	2	springer	ZAM	11019	chr2R:18987432-18998451	chr2R:23,099,909-23,110,928	+	18.436	78.998	75.016
105	chr2R_CG9850 -	1	ZAM	ZAM	14999	chr2R:19654383-19669382	chr2R:23,766,860-23,781,859	+	0.82925	19.387	56.21
106	chr2R_nvy +	2	ZAM	ZAM	5663	chr2R:20158052-20163715	chr2R:24,270,529-24,276,192	-	1.2555	3.511	15.962
107	chr2R_CG13579 +	1	mdg1	mdg1	45799	chr2R:20320705-20366504	chr2R:24,433,182-24,478,981	-	28.1062	829.823	358.989
108	chr2R_CG34038 +	1	ZAM	ZAM	5987	chr2R:21047036-21053023	chr2R:25,159,513-25,165,500	-	1.09275	10.016	27.066
109	chr3L_Pdk1 +	4	ZAM	copia	14289	chr3L:125486-139775	chr3L:125,486-139,775	-	5.62575	48.664	32.278
110	chr3L_CG3386 -	1	gypsy	gypsy	14455	chr3L:681751-696206	chr3L:681,751-696,206	+	3.64475	36.216	38.169
111	chr3L_not near genes_762	1	HMS-Beagle	HMS-Beagle	47559	chr3L:756000-803559	chr3L:756,000-803,559	-	3.80575	19.856	44.739
112	chr3L_bab1 -	4	copia	springer	191455	chr3L:995483-1186938	chr3L:995,483-1,186,938	+	45.0255	448.62	468.811
113	chr3L_zormin -	2	Juan	springer	334621	chr3L:1938576-2273197	chr3L:1,938,576-2,273,197	+	7.81125	197.953	257.513
114	chr3L_CG43444 -	4	copia	ZAM	46279	chr3L:2837630-2883909	chr3L:2,837,630-2,883,909	+	7.92425	151.85	157.526
115	chr3L_not near genes_339	3	ZAM	springer	8152	chr3L:3390836-3398988	chr3L:3,390,836-3,398,988	+	9.7465	38.726	58.289
116	chr3L_CG43915 +	1	ZAM	ZAM	6761	chr3L:3965291-3972052	chr3L:3,965,291-3,972,052	-	6.67525	24.465	17.088
117	chr3L_DOR +	1	ZAM	ZAM	4984	chr3L:4406907-4411891	chr3L:4,406,907-4,411,891	-	1.9895	11.576	14.225
118	chr3L_CG32237 -	2	jockey	ZAM	6083	chr3L:4854895-4860978	chr3L:4,854,895-4,860,978	+	31.005	84.779	46.493
119	chr3L_shep -	3	412	ZAM	69580	chr3L:5248696-5318276	chr3L:5,255,596-5,325,176	+	4.11025	61.438	112.24
120	chr3L_not near genes_531	2	Juan	ZAM	45710	chr3L:5271171-5316881	chr3L:5,278,071-5,323,781	-	53.7657	404.268	216.938
121	chr3L_Ir64a -	2	ZAM	roo	44999	chr3L:5370808-5415807	chr3L:5,377,708-5,422,707	+	7.03175	91.7011	80.685
122	chr3L_CG18586 +	1	ZAM	ZAM	48379	chr3L:5839200-5887579	chr3L:5,846,100-5,894,479	-	63.9497	487.368	465.476
123	chr3L_CG14820 +	3	roo	ZAM	8966	chr3L:6924176-6933142	chr3L:6,931,076-6,940,042	+	11.4645	29.959	24.896
124	chr3L_unc-13-4A -	1	roo	roo	66540	chr3L:7246125-7312665	chr3L:7,253,025-7,319,565	+	23.6985	150.829	155.127
125	chr3L_CG33275 +	1	gypsy	gypsy	120071	chr3L:7499874-7619945	chr3L:7,506,774-7,626,845	-	3.0095	25.124	91.424
126	chr3L_not near genes_865	2	ZAM	ZAM	11279	chr3L:8647011-8658290	chr3L:8,653,911-8,665,190	-	5.6405	8.123	12.192
127	chr3L_not near genes_869	1	ZAM	ZAM	8183	chr3L:8691416-8699599	chr3L:8,698,316-8,706,499	+	3.2405	17.721	12.492
128	chr3L_dally +	2	ZAM	springer	59449	chr3L:8800750-8860199	chr3L:8,807,650-8,867,099	-	10.6902	48.84	70.092
129	chr3L_PGRP-LA +	4	ZAM	ZAM	21516	chr3L:9297300-9318816	chr3L:9,304,200-9,325,716	-	11.6158	124.268	129.532
130	chr3L_CG4080 -	1	S-element	S-element	21990	chr3L:9374072-9396062	chr3L:9,380,972-9,402,962	+	5.00225	125.381	171.535
131	chr3L_not near genes_103	3	ZAM	Juan	37820	chr3L:10325610-10363430	chr3L:10,332,510-10,370,330	+	22.3575	118.696	70.922
132	chr3L_klu -	3	ZAM	ZAM	5988	chr3L:10972647-10978635	chr3L:10,979,547-10,985,535	+	14.1055	29.282	23.249
133	chr3L_CG32082 +	1	Stalker2	Stalker2	5340	chr3L:11151696-11157036	chr3L:11,158,596-11,163,936	+	0.124	21.188	121.429
134	chr3L_CG6149 -	1	springer	springer	8262	chr3L:11426760-11435022	chr3L:11,433,660-11,441,922	+	3.77925	35.879	18.449
135	chr3L_not near genes_131	1	ZAM	ZAM	9336	chr3L:13158321-13167657	chr3L:13,165,221-13,174,557	+	3.51675	15.095	10.063
136	chr3L_Fbp1 -	1	297	297	86375	chr3L:14087441-14173816	chr3L:14,094,341-14,180,716	+	0.72825	7.245	110.665
137	chr3L_CG3868 -	1	ZAM	ZAM	5814	chr3L:14394902-14400716	chr3L:14,401,802-14,407,616	-	0.18775	54.721	41.981
138	chr3L_not near genes_152	1	springer	springer	25341	chr3L:15202757-15228098	chr3L:15,209,657-15,234,998	+	3.9045	26.655	31.924
139	chr3L_not near genes_153	1	ZAM	ZAM	8634	chr3L:15391034-15399668	chr3L:15,397,934-15,406,568	+	4.1905	32.945	26.025
140	chr3L_CG33259 +	1	ZAM	ZAM	10853	chr3L:15361661-15398293	chr3L:15,368,561-15,405,193	-	13.8577	81.546	52.358
141	chr3L_CG7804 -	1	ZAM	ZAM	20097	chr3L:15468818-15488915	chr3L:15,475,718-15,495,815	+	11.693	61.2779	27.512
142	chr3L_CG13024 -	1	ZAM	ZAM	21849	chr3L:16812813-16834662	chr3L:16,819,713-16,841,562	+	2.40975	63.2109	45.109
143	chr3L_Lmpt +	3	springer	copia	56943	chr3L:16858800-16915743	chr3L:16,865,700-16,922,643	-	1.80275	73.957	102.667
144	chr3L_Rbp6 -	3	ZAM	ZAM	44999	chr3L:17144478-17189477	chr3L:17,151,378-17,196,377	+	12.53	241.615	166.656
145	chr3L_not near genes_172	2	ZAM	ZAM	6777	chr3L:17279837-17286614	chr3L:17,286,737-17,293,514	-	4.73525	14.444	8.501
146	chr3L_Pep -	1	springer	springer	15568	chr3L:17631395-17646963	chr3L:17,638,295-17,653,863	+	2.77475	27.604	25.388
147	chr3L_Ccn +	2	ZAM	ZAM	62293	chr3L:17675513-17737806	chr3L:17,682,413-17,744,706	-	16.08	135.204	87.444
148	chr3L_Adgf-A -	2	Quasimodo	pogo	24384	chr3L:17761190-17785574	chr3L:17,768,090-17,792,474	+	2.6205	82.554	291.544
149	chr3L_not near genes_182	1	ZAM	ZAM	18247	chr3L:18259411-18277658	chr3L:18,266,311-18,284,558	-	7.61775	24.268	19.573
150	chr3L_CR43892 -	1	copia	copia	7638	chr3L:19236827-19244465	chr3L:19,243,727-19,251,365	+	0.79725	35.836	34.698
151	chr3L_CG32206 -	1	ZAM	ZAM	18318	chr3L:19372881-19391199	chr3L:19,379,781-19,398,099	+	4.728	18.488	14.081
152	chr3L_not near genes_194	1	springer	springer	20758	chr3L:19418627-19439385	chr3L:19,425,527-19,446,285	+	55.2315	206.75	101.667
153	chr3L_CG14095 -	1	ZAM	ZAM	9337	chr3L:19456007-19465344	chr3L:19,462,907-19,472,244	+	2.99975	10.213	7.552
154	chr3L_kug +	1	roo	roo	23246	chr3L:19994452-20017698	chr3L:20,001,352-20,024,598	-	0.62775	20.867	42.16
155	chr3L_CG13814 +	5	Burdock	gypsy6	13612	chr3L:20235264-20248876	chr3L:20,242,164-20,255,776	-	2.04375	70.893	131.849
156	chr3L_not near genes_217	1	ZAM	ZAM	8586	chr3L:21707621-21716207	chr3L:21,714,521-21,723,107	+	17.9877	41.613	35.797
157	chr3L_not near genes_224	1	ZAM	ZAM	22346	chr3L:22469090-22491436	chr3L:22,475,990-22,498,336	+	0.927	26.189	19.866
158	chr3L_CG14459 -	1	mdg1	mdg1	57583	chr3L:22578949-22636532	chr3L:22,585,849-22,643,432	+	21.8832	486.299	366.352
159	chr3R_CG2022 -	2	mdg3	ZAM	15498	chr3R:812125-827623	chr3R:4,986,403-5,001,901	+	2.41675	34.287	35.531
160	chr3R_not near genes_880	1	ZAM	ZAM	2168	chr3R:878644-880812	chr3R:5,052,922-5,055,090	-	45.9473	85.569	89.853
161	chr3R_CG14669 +	1	ZAM	ZAM	15924	chr3R:1236295-1252219	chr3R:5,410,573-5,426,497	-	8.07174	115.348	75.499
162	chr3R_not near genes_154	1	ZAM	ZAM	9999	chr3R:1547861-1557860	chr3R:5,722,139-5,732,138	+	18.4467	76.694	75.635
163	chr3R_not near genes_189	3	mdg3	ZAM	102310	chr3R:1826965-1929275	chr3R:6,001,243-6,103,553	+	14.4877	502.136	358.939
164	chr3R_Vha14-2 +	1	ZAM	ZAM	7353	chr3R:1938219-1945572	chr3R:6,112,497-6,119,850	-	42.7192	101.1	82.576
165	chr3R_CG31559 -	2	copia	copia	9020	chr3R:1964021-1973041	chr3R:6,138,299-6,147,319	-	1.22625	28.897	23.318
166	chr3R_CG31559 -	1	ZAM	ZAM	10625	chr3R:1973730-1984355	chr3R:6,148,008-6,158,633	+	43.2262	99.0741	62.513
167	chr3R_not near genes_234	2	springer	mdg3	22227	chr3R:2331044-2353271	chr3R:6,505,322-6,527,549	+	4.212	79.4791	80.102
168	chr3R_dpr11 -	1	copia	copia	39312	chr3R:2386654-2425966	chr3R:6,560,932-6,600,244	-	5.774	187.087	147.185
169	chr3R_Antp -	1	ZAM	ZAM	14999	chr3R:2776823-2791822	chr3R:6,951,101-6,966,100	+	8.5395	43.153	28.8
170	chr3R_not near genes_347	1	Quasimodo	Quasimodo	45710	chr3R:3430417-3476127	chr3R:7,604,695-7,650,405	-	0.2665	17.327	101.611
171	chr3R_Nlg1 +	1	copia	copia	29999	chr3R:3490020-3520019	chr3R:7,664,298-7,694,297	-	8.10075	47.847	16.407
172	chr3R_CG2781 -	1	ZAM	ZAM	9999	chr3R:3812240-3822239	chr3R:7,986,518-7,996,517	-	0	21.575	31.23
173	chr3R_ps +	1	ZAM	ZAM	38317	chr3R:5236563-5274880	chr3R:9,410,841-9,449,158	-	0.244	11.246	54.477
174	chr3R_mura -	1	copia	copia	3863	chr3R:5369909-5373772	chr3R:9,544,187-9,548,050	+	0.518	23.894	15.037
175	chr3R_CG9492 -	1	ZAM	ZAM	7686	chr3R:5486124-5493810	chr3R:9,660,402-9,668,088	+	13.887	24.268	12.318
176	chr3R_Teh1 -	1	mdg3	mdg3	31098	chr3R:5666096-5697194	chr3R:9,840,374-9,871,472	+	15.073	366.803	288.934
177	chr3R_not near genes_624	1	ZAM	ZAM	6461	chr3R:6241791-6248252	chr3R:10,416,069-10,422,530	-	13.3435	36.414	30.448
178	chr3R_not near genes_673	1	412	412	29999	chr3R:6739187-6769186	chr3R:10,913,465-10,943,464	+	4.832	95.858	100.517
179	chr3R_not near genes_730	2	jockey	ZAM	10142	chr3R:7305340-7315482	chr3R:11,479,618-11,489,760	+	6.658	11.556	15.788
180	chr3R_CG12594 +	2	ZAM	flea	3981	chr3R:7538978-7542959	chr3R:11,713,256-11,717,237	-	2.20225	13.488	10.063
181	chr3R_CG31358 -	1	ZAM	ZAM	9999	chr3R:7856731-7866730	chr3R:12,031,009-12,041,008	+	5.02125	29.086	18.391
182	chr3R_GstD2 +	1	springer	springer	6540	chr3R:8190942-8197482	chr3R:12,365,220-12,371,760	-	1.12375	280.59	128.369
183	chr3R_not near genes_855	1	ZAM	ZAM	9999	chr3R:8559321-8569320	chr3R:12,733,599-12,743,598	+	6.95725	34.289	17.002
184	chr3R_not near genes_932	1	ZAM	ZAM	9999	chr3R:9320686-9330685	chr3R:13,494,964-13,504,963	+	4.89775	12.71	11.104
185	chr3R_not near genes_942	1	mdg1	mdg1	29999	chr3R:9428120-9458119	chr3R:13,602,398-13,632,397	+	16.865	334.143	182.846
186	chr3R_Pde6 -	1	mdg1	mdg1	19052	chr3R:10339751-10358803	chr3R:14,514,029-14,533,081	-	8.82625	531.875	470.787
187	chr3R_kibra -	1	springer	springer	8926	chr3R:10548884-10557810	chr3R:14,723,162-14,732,088	+	2.79425	19.089	19.431
188	chr3R_btsz -	1	ZAM	ZAM	12180	chr3R:10640085-10652265	chr3R:14,814,363-14,826,543	+	17.253	38.528	31.227
189	chr3R_Cad89D -	1	ZAM	ZAM	6825	chr3R:12321176-12328001	chr3R:16,495,454-16,502,279	+	29.3675	65.125	41.375
190	chr3R_Dscam3 -	1	copia	copia	9999	chr3R:13320412-13330411	chr3R:17,494,690-17,504,689	+	0.2875	15.023	18.39
191	chr3R_osa -	2	ZAM	springer	30213	chr3R:13514859-13545072	chr3R:17,689,137-17,719,350	+	1.34775	18.098	36.467
192	chr3R_cpo +	1	jockey	jockey	2228	chr3R:13759339-13761567	chr3R:17,933,617-17,935,845	-	1.46575	14.258	14.225
193	chr3R_CG7675 -	1	ZAM	ZAM	17322	chr3R:14202091-14219413	chr3R:18,376,369-18,393,691	+	4.202	31.971	28.974
194	chr3R_fru -	1	ZAM	ZAM	6257	chr3R:14367248-14373505	chr3R:18,541,526-18,547,783	+	2.3825	17.077	8.646
195	chr3R_CG43194 -	1	ZAM	ZAM	6140	chr3R:14392417-14398557	chr3R:18,566,695-18,572,835	+	11.96	31.79	27.7
196	chr3R_CG18208 -	2	opus	Rt1a	84323	chr3R:14585371-14669694	chr3R:18,759,649-18,843,972	+	27.5495	308.351	320.458
197	chr3R_CG31226 -	1	17.6	17.6	84323	chr3R:14585371-14669694	chr3R:18,759,649-18,843,972	+	27.5495	308.351	320.458
198	chr3R_Dl -	1	ZAM	ZAM	6106	chr3R:15139027-15145133	chr3R:19,313,305-19,319,411	+	1.192	21.186	20.819
199	chr3R_not near genes_160	1	ZAM	ZAM	4625	chr3R:16015199-16019824	chr3R:20,189,477-20,194,102	-	4.75825	21.386	12.145
200	chr3R_Atpalpha +	1	mdg3	mdg3	4564	chr3R:16790030-16794594	chr3R:20,964,308-20,968,872	-	0.07575	11.174	30.187
201	chr3R_CR43453 +	1	ZAM	ZAM	9033	chr3R:17286010-17295043	chr3R:21,460,288-21,469,321	-	1.2945	8.472	22.727
202	chr3R_how +	2	ZAM	springer	38004	chr3R:17867404-17905408	chr3R:22,041,682-22,079,686	-	10.213	150.346	120.1
203	chr3R_CG7084 +	1	ZAM	ZAM	23823	chr3R:18104220-18128043	chr3R:22,278,498-22,302,321	-	24.2122	169.084	118.792
204	chr3R_not near genes_207	1	ZAM	ZAM	4490	chr3R:20797522-20802012	chr3R:24,971,800-24,976,290	+	16.3467	43.932	35.043
205	chr3R_CR42745 +	1	springer	springer	12897	chr3R:22048020-22060917	chr3R:26,222,298-26,235,195	-	0.525	10.012	12.709
206	chr3R_scrib +	1	mdg1	mdg1	9501	chr3R:22363900-22373401	chr3R:26,538,178-26,547,679	-	1.44375	17.723	7.807
207	chr3R_T48 +	2	297	ZAM	18243	chr3R:22706169-22724412	chr3R:26,880,447-26,898,690	-	7.89225	71.411	53.32
208	chr3R_Ser -	1	ZAM	ZAM	6440	chr3R:22996721-23003161	chr3R:27,170,999-27,177,439	+	4.7285	9.627	10.41
209	chr3R_not near genes_230	1	ZAM	ZAM	10183	chr3R:23024469-23034652	chr3R:27,198,747-27,208,930	-	5.07825	14.635	10.088
210	chr3R_side -	1	ZAM	ZAM	8808	chr3R:23240855-23249663	chr3R:27,415,133-27,423,941	+	11.4035	32.942	22.034
211	chr3R_CG5639 -	1	ZAM	ZAM	11923	chr3R:23417424-23429347	chr3R:27,591,702-27,603,625	+	9.6265	39.301	23.943
212	chr3R_tau -	1	copia	copia	6736	chr3R:23466692-23473428	chr3R:27,640,970-27,647,706	+	2.26	12.65	10.93
213	chr3R_CG34353 -	4	ZAM	ZAM	15102	chr3R:23602499-23617601	chr3R:27,776,777-27,791,879	+	23.7997	424.041	245.186
214	chr3R_CG43125 -	1	ZAM	ZAM	7327	chr3R:24088823-24096150	chr3R:28,263,101-28,270,428	+	0.65175	6.548	18.738
215	chr3R_not near genes_240	1	ZAM	ZAM	9006	chr3R:24088904-24097910	chr3R:28,263,182-28,272,188	-	1.60825	19.264	16.309
216	chr3R_not near genes_242	1	mdg1	mdg1	20084	chr3R:24207494-24227578	chr3R:28,381,772-28,401,856	+	13.1975	404.13	244.87
217	chr3R_CR31044 +	1	copia	copia	5569	chr3R:25038801-25044370	chr3R:29,213,079-29,218,648	-	0.372	11.556	11.104
218	chr3R_not near genes_251	6	ZAM	ZAM	23422	chr3R:25092831-25116253	chr3R:29,267,109-29,290,531	+	29.102	85.188	47.588
219	chr3R_Ptp99A +	1	ZAM	ZAM	24185	chr3R:25281189-25305374	chr3R:29,455,467-29,479,652	-	1.64025	39.296	36.33
220	chr3R_CG2014 +	1	springer	springer	9915	chr3R:25342188-25352103	chr3R:29,516,466-29,526,381	-	9.0715	50.666	36.433
221	chr3R_CR43613 +	1	ZAM	ZAM	3695	chr3R:25361037-25364732	chr3R:29,535,315-29,539,010	-	22.9687	63.592	48.295
222	chr3R_Cad99C +	1	ZAM	ZAM	9596	chr3R:25660949-25670545	chr3R:29,835,227-29,844,823	-	21.84	89.017	64.536
223	chr3R_CG31028 -	1	ZAM	ZAM	6630	chr3R:25996898-26003528	chr3R:30,171,176-30,177,806	+	8.82175	50.867	45.456
224	chr3R_not near genes_262	1	ZAM	ZAM	10813	chr3R:26234099-26244912	chr3R:30,408,377-30,419,190	+	18.9152	52.014	45.456
225	chr3R_tmod +	2	opus	ZAM	27226	chr3R:26360741-26387967	chr3R:30,535,019-30,562,245	+	0	46.557	60.446
226	chr3R_CG2267 -	2	ZAM	roo	23523	chr3R:26452152-26475675	chr3R:30,626,430-30,649,953	+	6.91525	42.146	26.82
227	chr3R_not near genes_264	2	ZAM	ZAM	22092	chr3R:26452284-26474376	chr3R:30,626,562-30,648,654	+	6.91525	39.064	25.432
228	chr3R_not near genes_265	1	ZAM	ZAM	6421	chr3R:26541050-26547471	chr3R:30,715,328-30,721,749	+	9.67325	35.835	31.921
229	chr3R_nyo +	2	ZAM	412	9999	chr3R:27369508-27379507	chr3R:31,543,786-31,553,785	-	7.24175	39.296	28.454
230	chr3R_kek6 +	1	ZAM	ZAM	19427	chr3R:27448808-27468235	chr3R:31,623,086-31,642,513	-	26.1618	35.056	32.617
231	chr3R_CR44091 -	1	ZAM	ZAM	9158	chr3R:27508145-27517303	chr3R:31,682,423-31,691,581	+	19.11	73.984	80.148
232	chr3R_RhoGAP100F +	4	roo	ZAM	20538	chr3R:27643063-27663601	chr3R:31,817,341-31,837,879	-	55.727	285.95	174.443
233	chr3R_heph -	2	ZAM	mdg3	6987	chr3R:27762604-27769591	chr3R:31,936,882-31,943,869	+	0.6585	5.201	26.369
234	chrX_CG32816 -	1	ZAM	ZAM	9999	chrX:334912-344911	chrX:440,879-450,878	+	14.3557	73.648	65.231
235	chrX_CG3655 -	2	ZAM	mdg3	8493	chrX:983126-991619	chrX:1,089,093-1,097,586	-	0	99.44	94.025
236	chrX_Atf3 -	3	ZAM	mdg3	19551	chrX:1134320-1153871	chrX:1,240,287-1,259,838	+	1.47925	54.3149	75.338
237	chrX_DAAM -	1	ZAM	ZAM	12692	chrX:1202031-1214723	chrX:1,307,998-1,320,690	+	3.37325	13.864	23.596
238	chrX_not near genes_165	1	ZAM	ZAM	4885	chrX:1649664-1654549	chrX:1,755,631-1,760,516	-	8.0655	22.348	13.88
239	chrX_ptr -	1	springer	springer	13738	chrX:2247372-2261110	chrX:2,353,339-2,367,077	+	2.3965	49.119	47.19
240	chrX_kirre +	4	ZAM	springer	16078	chrX:2976042-2992120	chrX:3,082,009-3,098,087	+	0	67.814	41.727
241	chrX_CG12535 -	3	ZAM	hobo	17805	chrX:3293117-3310922	chrX:3,399,084-3,416,889	+	11.47	57.069	47.602
242	chrX_Gas8 -	1	roo	roo	46105	chrX:3396270-3442375	chrX:3,502,237-3,548,342	+	23.6455	62.8349	51.983
243	chrX_AlstR +	3	ZAM	297	8521	chrX:3514564-3523085	chrX:3,620,531-3,629,052	-	2.3975	9.243	18.13
244	chrX_ec +	2	hobo	ZAM	2923	chrX:3737322-3740245	chrX:3,843,289-3,846,212	-	3.8585	7.705	11.45
245	chrX_CG2930 +	1	ZAM	ZAM	17442	chrX:3757591-3775033	chrX:3,863,558-3,881,000	-	7.91825	54.126	66.807
246	chrX_not near genes_395	1	ZAM	ZAM	44999	chrX:3908000-3952999	chrX:4,013,967-4,058,966	-	41.904	74.735	60.001
247	chrX_CG12691 +	2	ZAM	mdg1	10706	chrX:4146976-4157682	chrX:4,252,943-4,263,649	-	25.63	161.156	135.29
248	chrX_CG32773 -	1	ZAM	ZAM	5263	chrX:4286106-4291369	chrX:4,392,073-4,397,336	+	4.36175	14.257	18.563
249	chrX_CG15472 -	1	ZAM	ZAM	13897	chrX:4658533-4672430	chrX:4,764,500-4,778,397	+	15.7627	138.796	147.456
250	chrX_CG42594 +	3	ZAM	ZAM	67429	chrX:4726521-4793950	chrX:4,832,488-4,899,917	-	35.3903	234.347	355.869
251	chrX_ovo +	3	ZAM	ZAM	113565	chrX:4845837-4959402	chrX:4,951,804-5,065,369	-	14.3372	189.749	307.186
252	chrX_CG33080 -	3	hobo	pogo	9477	chrX:5611828-5621305	chrX:5,717,795-5,727,272	+	2.41125	22.34	45.629
253	chrX_CG43136 +	1	ZAM	ZAM	8535	chrX:5737962-5746497	chrX:5,843,929-5,852,464	-	15.8175	37.376	31.228
254	chrX_CG16721 +	1	springer	springer	8430	chrX:5773750-5782180	chrX:5,879,717-5,888,147	-	9.37525	119.177	119.93
255	chrX_Act5C +	1	springer	springer	5873	chrX:5787072-5792945	chrX:5,893,039-5,898,912	-	6.18	31.609	45.108
256	chrX_RpL17 -	1	ZAM	ZAM	1733	chrX:6634672-6636405	chrX:6,740,639-6,742,372	+	2.40025	12.331	17.349
257	chrX_pod1 +	1	ZAM	ZAM	4089	chrX:6702350-6706439	chrX:6,808,317-6,812,406	-	0.70575	5.778	10.41
258	chrX_not near genes_675	1	springer	springer	2363	chrX:6755450-6757813	chrX:6,861,417-6,863,780	+	2.969	35.844	33.307
259	chrX_CG1958 +	1	ZAM	ZAM	2907	chrX:7163079-7165986	chrX:7,269,046-7,271,953	-	5.46975	14.45	4.164
260	chrX_CG1677 -	1	springer	springer	6570	chrX:7211330-7217900	chrX:7,317,297-7,323,867	+	2.524	18.492	15.962
261	chrX_not near genes_745	1	ZAM	ZAM	11156	chrX:7454963-7466119	chrX:7,560,930-7,572,086	+	10.219	38.526	28.8
262	chrX_not near genes_825	2	pogo	springer	26967	chrX:8226090-8253057	chrX:8,332,057-8,359,024	-	15.06	117.14	117.231
263	chrX_l(1)G0232 -	2	roo	springer	10009	chrX:9534495-9544504	chrX:9,640,462-9,650,471	+	0.25825	10.978	17.001
264	chrX_Cht6 +	1	springer	springer	17016	chrX:9922641-9939657	chrX:10,028,608-10,045,624	-	8.72799	78.214	197.414
265	chrX_CG43902 +	2	ZAM	ZAM	70272	chrX:9991323-10061595	chrX:10,097,290-10,167,562	-	87.6564	360.204	254.907
266	chrX_X11Lbeta +	2	ZAM	mdg3	11132	chrX:10563051-10574183	chrX:10,669,018-10,680,150	-	4.24875	51.89	51.91
267	chrX_bif +	2	Stalker2	Stalker2	2765	chrX:11583660-11586425	chrX:11,689,627-11,692,392	-	0.08375	4.24	11.45
268	chrX_Smr -	1	springer	springer	12337	chrX:12616355-12628692	chrX:12,722,322-12,734,659	+	2.9015	27.934	46.303
269	chrX_Pde9 -	4	springer	ZAM	11463	chrX:12785567-12797030	chrX:12,891,534-12,902,997	+	7.04075	26.196	29.494
270	chrX_CG15753 +	1	springer	springer	31481	chrX:13384399-13415880	chrX:13,490,366-13,521,847	-	2.15525	52.18	57.081
271	chrX_dpr8 +	2	Juan	ZAM	33718	chrX:14314914-14348632	chrX:14,420,881-14,454,599	-	16.4182	96.4981	60.195
272	chrX_cngl -	1	jockey	jockey	22058	chrX:15290254-15312312	chrX:15,396,221-15,418,279	+	13.9642	76.269	77.776
273	chrX_mmd -	2	ZAM	roo	10623	chrX:15855134-15865757	chrX:15,961,101-15,971,724	+	17.7845	107.52	74.945
274	chrX_not near genes_160	1	ZAM	ZAM	23041	chrX:16043739-16066780	chrX:16,149,706-16,172,747	-	28.5562	222.35	194.303
275	chrX_CG4928 +	1	springer	springer	2796	chrX:16800717-16803513	chrX:16,906,684-16,909,480	-	2.06	18.112	14.92
276	chrX_Frq2 +	1	ZAM	ZAM	4002	chrX:18090921-18094923	chrX:18,196,888-18,200,890	-	0.491	8.091	14.296
277	chrX_CG6123 -	2	ZAM	springer	7445	chrX:18239755-18247200	chrX:18,345,722-18,353,167	+	6.44075	20.028	15.384
278	chrX_RhoGAP18B -	2	copia	copia	12715	chrX:19039697-19052412	chrX:19,145,664-19,158,379	+	3.7795	16.369	28.453
279	chrX_CG8051 -	1	ZAM	ZAM	6145	chrX:19195593-19201738	chrX:19,301,560-19,307,705	+	13.8207	55.107	40.595
280	chrX_vfl -	1	springer	mdg3	8367	chrX:19681796-19690163	chrX:19,787,763-19,796,130	+	6.001	68.406	53.254
281	chrX_not near genes_198	2	ZAM	mdg3	4643	chrX:19863546-19868189	chrX:19,969,513-19,974,156	-	5.57875	29.868	24.983
282	chrX_not near genes_199	3	hopper	ZAM	137837	chrX:19875466-20013303	chrX:19,981,433-20,119,270	+	52.747	1781.55	2547.75
283	chrX_not near genes_202	3	Doc	ZAM	10512	chrX:20222451-20232963	chrX:20,351,424-20,361,936	+	3.28925	75.592	94.39
284	chrX_RunxA -	3	ZAM	ZAM	40494	chrX:20465698-20506192	chrX:20,594,671-20,635,165	+	78.9187	449.096	348.053
285	chrX_shakB -	3	ZAM	roo	59401	chrX:20645275-20704676	chrX:20,774,248-20,833,649	+	50.4153	571.609	499.478
286	chrX_r-cup -	4	BS	ZAM	45142	chrX:20859315-20904457	chrX:20,988,288-21,033,430	-	10.0123	117.977	122.14
287	chrX_not near genes_214	5	ZAM	ZAM	10116	chrX:21423766-21433882	chrX:21,552,739-21,562,855	+	26.0697	106.487	110.728
288	chrX_not near genes_215	2	mdg1	gypsy2	3589	chrX:21526530-21530119	chrX:21,655,503-21,659,092	+	59.9273	473.675	323.355
289	chrX_not near genes_216	2	Max-element	G6	29081	chrX:21650344-21679425	chrX:21,779,317-21,878,785	+	86.5845	327.767	273.265

## Sheet: OSC_C_TE-linked_lncRNAs
Table S5. TE-associated LncRNAs in Drosophila gonadal cell cultures. Tab: OSC_C_TE-linked lncRNAs
lncRNA#	lncRNA locus descriptor	# TEs	First TE	Last TE	Length	Release 5 Genome Coordinates	Release 6 Genome Coordinates	Strand	siGFP GRO-Seq RNA (RPMs)	siPiwi GRO-Seq RNA (RPMs)
1	chr2L_CG34172 -	1	mdg3	mdg3	6458	chr2L:2195053-2201511	chr2L:2,195,053-2,201,511	+	49.237	25.729
2	chr2L_lilli +	1	297	297	9058	chr2L:2909698-2918756	chr2L:2,909,698-2,918,756	-	2.129	19.872
3	chr2L_CG3347 +	2	springer	springer	8857	chr2L:3259131-3267988	chr2L:3,259,131-3,267,988	-	85.66	78.141
4	chr2L_E23 -	1	springer	springer	20657	chr2L:3345029-3365686	chr2L:3,345,029-3,365,686	+	20.658	40.478
5	chr2L_fred -	1	springer	springer	21954	chr2L:3906486-3928440	chr2L:3,906,486-3,928,440	+	77.875	92.1158
6	chr2L_ed +	1	springer	springer	22499	chr2L:4071491-4093990	chr2L:4,071,491-4,093,990	-	30.737	47.921
7	chr2L_Traf4 +	2	copia	springer	31139	chr2L:4344601-4375740	chr2L:4,344,601-4,375,740	-	28.175	89.2579
8	chr2L_tkv -	2	springer	I-element	5305	chr2L:5246725-5252030	chr2L:5,246,725-5,252,030	+	21.106	4.885
9	chr2L_not near genes_547	1	springer	springer	6126	chr2L:5476006-5482132	chr2L:5,476,006-5,482,132	+	65.875	54.205
10	chr2L_not near genes_548	1	mdg3	mdg3	20680	chr2L:5480640-5501320	chr2L:5,480,640-5,501,320	+	46.207	72.1079
11	chr2L_CG8965 -	1	gypsy	gypsy	14186	chr2L:5874431-5888617	chr2L:5,874,431-5,888,617	+	3.708	33.474
12	chr2L_CG16947 -	1	297	297	3719	chr2L:6464801-6468520	chr2L:6,464,801-6,468,520	+	12.468	33.707
13	chr2L_CG9531 -	1	blood	blood	4129	chr2L:6464903-6469032	chr2L:6,464,903-6,469,032	+	12.468	34.267
14	chr2L_pes -	1	springer	springer	5668	chr2L:7993066-7998734	chr2L:7,993,066-7,998,734	+	23.2	38.594
15	chr2L_CG5853 -	1	springer	springer	7143	chr2L:9947512-9954655	chr2L:9,947,512-9,954,655	+	53.611	42.519
16	chr2L_Samuel -	2	springer	412	6987	chr2L:11057957-11064944	chr2L:11,057,957-11,064,944	-	68.608	134.555
17	chr2L_Ca-beta -	1	gypsy	gypsy	6784	chr2L:11190690-11197474	chr2L:11,190,690-11,197,474	+	0.017	17.831
18	chr2L_CG15841 -	1	412	412	4655	chr2L:11587008-11591663	chr2L:11,587,008-11,591,663	-	0.755	22.371
19	chr2L_Pde1c -	1	412	412	7211	chr2L:11819780-11826991	chr2L:11,819,780-11,826,991	+	1.237	40.338
20	chr2L_bru-2 +	1	gypsy	gypsy	8634	chr2L:12363136-12371770	chr2L:12,363,136-12,371,770	-	5.099	18.59
21	chr2L_not near genes_133	1	297	297	5502	chr2L:13338279-13343781	chr2L:13,338,279-13,343,781	+	0.292	11.519
22	chr2L_kuz +	1	mdg1	mdg1	19604	chr2L:13569818-13589422	chr2L:13,569,818-13,589,422	-	2.042	29.853
23	chr2L_nimA +	1	gypsy	gypsy	14979	chr2L:13942624-13957603	chr2L:13,942,624-13,957,603	-	1.322	24.099
24	chr2L_CG15283 -	4	springer	springer	20115	chr2L:14443197-14463312	chr2L:14,443,197-14,463,312	+	98.761	103.301
25	chr2L_CG4168 -	2	Stalker2	springer	2875	chr2L:15168798-15171673	chr2L:15,168,798-15,171,673	+	0.599	22.146
26	chr2L_not near genes_154	1	springer	springer	14999	chr2L:15454069-15469068	chr2L:15,454,069-15,469,068	-	55.847	66.782
27	chr2L_not near genes_155	1	mdg1	mdg1	11635	chr2L:15527423-15539058	chr2L:15,527,423-15,539,058	-	1.836	165.71
28	chr2L_not near genes_158	1	gypsy	gypsy	7892	chr2L:15819580-15827472	chr2L:15,819,580-15,827,472	+	1.383	51.085
29	chr2L_Mhc +	1	springer	springer	11345	chr2L:16765145-16776490	chr2L:16,765,145-16,776,490	-	73.532	55.543
30	chr2L_CR43802 -	1	412	412	4494	chr2L:17042629-17047123	chr2L:17,042,629-17,047,123	+	1.355	18.936
31	chr2L_mir-124 +	1	blood	blood	9263	chr2L:17559956-17569219	chr2L:17,559,956-17,569,219	-	0.616	32.796
32	chr2L_CadN -	1	412	412	2843	chr2L:17685536-17688379	chr2L:17,685,536-17,688,379	+	1.957	52.092
33	chr2L_CG10283 -	1	gypsy	gypsy	6117	chr2L:18479394-18485511	chr2L:18,479,394-18,485,511	+	1.889	14.384
34	chr2L_Lim3 -	1	Stalker2	Stalker2	5885	chr2L:19089986-19095871	chr2L:19,089,986-19,095,871	+	2.09	86.5509
35	chr2L_CR43839 -	1	springer	springer	3212	chr2L:19472221-19475433	chr2L:19,472,221-19,475,433	-	37.829	10.495
36	chr2L_sick +	1	gypsy	gypsy	17708	chr2L:19842039-19859747	chr2L:19,842,039-19,859,747	-	2.353	33.037
37	chr2L_spir +	1	gypsy	gypsy	11947	chr2L:20311360-20323307	chr2L:20,311,360-20,323,307	-	0.824	32.361
38	chr2L_not near genes_206	1	412	412	4819	chr2L:20629357-20634176	chr2L:20,629,357-20,634,176	+	0.291	25.702
39	chr2L_not near genes_215	1	mdg1	mdg1	3603	chr2L:21557157-21560760	chr2L:21,557,157-21,560,760	+	6.528	106.67
40	chr2R_CG7882 +	1	mdg1	mdg1	11462	chr2R:1831927-1843389	chr2R:5,944,422-5,955,884	-	0.88	268.46
41	chr2R_not near genes_273	1	blood	blood	6185	chr2R:2731056-2737241	chr2R:6,843,551-6,849,736	-	1.595	31.056
42	chr2R_ana +	1	copia	copia	9926	chr2R:4962739-4972665	chr2R:9,075,234-9,085,160	-	85.056	83.983
43	chr2R_KCNQ -	1	gypsy	gypsy	7697	chr2R:6056760-6064457	chr2R:10,169,255-10,176,952	+	0.858	10.179
44	chr2R_CG33144 -	2	springer	I-element	5181	chr2R:6654727-6659908	chr2R:10,767,222-10,772,403	+	83.866	68.306
45	chr2R_luna -	2	springer	gypsy6	8075	chr2R:6932173-6940248	chr2R:11,044,668-11,052,743	+	20.247	14.881
46	chr2R_ths +	1	springer	springer	14559	chr2R:7678030-7692589	chr2R:11,790,525-11,805,084	-	17.037	68.531
47	chr2R_not near genes_870	1	297	297	2761	chr2R:8704486-8707247	chr2R:12,816,981-12,819,742	+	3.417	18.535
48	chr2R_Prosap -	1	springer	springer	9189	chr2R:10015127-10024316	chr2R:14,127,622-14,136,811	+	12.915	69.629
49	chr2R_igl +	1	mdg1	mdg1	9698	chr2R:11052687-11062385	chr2R:15,165,182-15,174,880	-	1.08	211.293
50	chr2R_sli -	1	copia	copia	3955	chr2R:11802880-11806835	chr2R:15,915,375-15,919,330	+	1.733	10.057
51	chr2R_CG5065 +	1	gypsy	gypsy	7365	chr2R:12492502-12499867	chr2R:16,604,997-16,612,362	-	0.222	50.867
52	chr2R_CG30456 +	1	springer	springer	6830	chr2R:12985041-12991871	chr2R:17,097,536-17,104,366	-	44.255	52.898
53	chr2R_Klp54D +	1	copia	copia	1411	chr2R:13445044-13446455	chr2R:17,557,539-17,558,950	-	22.805	33.99
54	chr2R_sbb -	1	springer	springer	3501	chr2R:14238272-14241773	chr2R:18,350,767-18,354,268	+	0.549	12.492
55	chr2R_ena +	1	297	297	2220	chr2R:15043848-15046068	chr2R:19,156,343-19,158,563	-	2.969	19.562
56	chr2R_not near genes_163	1	diver	diver	23006	chr2R:16278531-16301537	chr2R:20,391,026-20,414,032	-	22.207	30.187
57	chr2R_CG12484 +	2	17.6	Tabor	4892	chr2R:16323751-16328643	chr2R:20,436,246-20,441,138	-	2.402	28.003
58	chr2R_not near genes_167	1	F-element	F-element	4205	chr2R:16701214-16705419	chr2R:20,813,709-20,817,914	+	7.074	18.909
59	chr2R_not near genes_169	1	springer	springer	2020	chr2R:16924810-16926830	chr2R:21,037,305-21,039,325	+	15.679	10.001
60	chr2R_twi +	1	flea	flea	2376	chr2R:18940624-18943000	chr2R:23,053,101-23,055,477	+	8.484	16.855
61	chr2R_not near genes_191	1	gypsy	gypsy	14298	chr2R:19099378-19113676	chr2R:23,211,855-23,226,153	-	0.326	45.412
62	chr2R_CG17664 -	1	mdg1	mdg1	4688	chr2R:19497202-19501890	chr2R:23,609,679-23,614,367	+	0.429	23.891
63	chr2R_nord +	2	mdg3	gypsy	14428	chr2R:20128001-20142429	chr2R:24,240,478-24,254,906	-	0.6	42.415
64	chr3L_not near genes_780	1	springer	springer	5060	chr3L:779956-785016	chr3L:779,956-785,016	+	33.913	36.85
65	chr3L_bab1 -	2	gypsy	springer	4105	chr3L:1094988-1099093	chr3L:1,094,988-1,099,093	+	11.178	10.708
66	chr3L_CG43444 -	1	springer	springer	11581	chr3L:2875316-2886897	chr3L:2,875,316-2,886,897	+	11.678	24.504
67	chr3L_CG17746 -	1	diver	diver	1091	chr3L:3239593-3240684	chr3L:3,239,593-3,240,684	-	39.651	9.379
68	chr3L_CG32264 -	1	297	297	7939	chr3L:3739067-3747006	chr3L:3,739,067-3,747,006	+	2.299	59.592
69	chr3L_shep -	2	gypsy	mdg3	17452	chr3L:5174029-5191481	chr3L:5,180,929-5,198,381	+	1.546	57.9639
70	chr3L_blanks -	1	gypsy	gypsy	13731	chr3L:5491680-5505411	chr3L:5,498,580-5,512,311	+	0.051	16.177
71	chr3L_nmo +	1	springer	springer	9375	chr3L:7992688-8002063	chr3L:7,999,588-8,008,963	-	1.545	11.266
72	chr3L_dally +	1	springer	springer	10614	chr3L:8860662-8871276	chr3L:8,867,562-8,878,176	-	9.176	35.48
73	chr3L_not near genes_109	1	412	412	10396	chr3L:10907495-10917891	chr3L:10,914,395-10,924,791	+	0.583	29.147
74	chr3L_CG6938 +	2	springer	Tabor	1809	chr3L:11977418-11979227	chr3L:11,984,318-11,986,127	-	0.274	15.854
75	chr3L_not near genes_126	2	springer	springer	6190	chr3L:12646456-12652646	chr3L:12,653,356-12,659,546	-	24.347	28.564
76	chr3L_CG32115 -	1	gypsy	gypsy	6536	chr3L:12906346-12912882	chr3L:12,913,246-12,919,782	+	4.088	22.81
77	chr3L_not near genes_129	1	297	297	6074	chr3L:12934177-12940251	chr3L:12,941,077-12,947,151	-	0.412	11.085
78	chr3L_not near genes_133	1	copia	copia	27227	chr3L:13315182-13342409	chr3L:13,322,082-13,349,309	+	25.861	37.08
79	chr3L_CG10741 +	1	gypsy	gypsy	11675	chr3L:13479696-13491371	chr3L:13,486,596-13,498,271	-	10.555	21.052
80	chr3L_bru-3 -	1	Stalker4	Stalker4	5984	chr3L:13681123-13687107	chr3L:13,688,023-13,694,007	+	1.646	20.869
81	chr3L_fz +	2	F-element	springer	23033	chr3L:14282256-14305289	chr3L:14,289,156-14,312,189	-	19.283	69.8649
82	chr3L_not near genes_151	1	springer	springer	13341	chr3L:15175112-15188453	chr3L:15,182,012-15,195,353	+	24.835	34.32
83	chr3L_Rbp6 -	1	gypsy	gypsy	12583	chr3L:17211443-17224026	chr3L:17,218,343-17,230,926	+	1.271	59.4989
84	chr3L_Adgf-A -	3	gypsy	Quasimodo	3734	chr3L:17757623-17761357	chr3L:17,764,523-17,768,257	-	0.789	59.938
85	chr3L_not near genes_179	1	gypsy	gypsy	22522	chr3L:17919021-17941543	chr3L:17,925,921-17,948,443	+	2.436	93.0418
86	chr3L_W -	1	gypsy	gypsy	20402	chr3L:18165567-18185969	chr3L:18,172,467-18,192,869	+	1.413	51.5639
87	chr3L_not near genes_181	1	gypsy	gypsy	5601	chr3L:18188880-18194481	chr3L:18,195,780-18,201,381	+	1.477	21.929
88	chr3L_CG14073 -	2	gypsy	gypsy	5771	chr3L:18806592-18812363	chr3L:18,813,492-18,819,263	+	1.683	18.252
89	chr3L_CG14082 -	1	blood	blood	27311	chr3L:19105896-19133207	chr3L:19,112,796-19,140,107	+	7.49	20.035
90	chr3L_fz2 -	1	springer	springer	4431	chr3L:19212134-19216565	chr3L:19,219,034-19,223,465	+	11.116	12.938
91	chr3L_Shal -	2	gypsy	gypsy	8839	chr3L:19568368-19577207	chr3L:19,575,268-19,584,107	+	4.568	41.896
92	chr3L_Oat -	2	springer	297	11959	chr3L:19641930-19653889	chr3L:19,648,830-19,660,789	+	54.202	57.287
93	chr3L_CG32425 +	1	springer	springer	11043	chr3L:20490032-20501075	chr3L:20,496,932-20,507,975	-	40.53	51.435
94	chr3L_CR43930 -	1	gypsy	gypsy	22499	chr3L:20905222-20927721	chr3L:20,912,122-20,934,621	+	11.042	36.388
95	chr3L_not near genes_213	1	springer	springer	6067	chr3L:21358463-21364530	chr3L:21,365,363-21,371,430	+	42.296	17.554
96	chr3L_not near genes_219	1	springer	springer	20048	chr3L:21999160-22019208	chr3L:22,006,060-22,026,108	+	127.333	181.481
97	chr3L_jim -	1	springer	springer	9911	chr3L:22815012-22824923	chr3L:22,821,912-22,831,823	+	6.165	31.646
98	chr3L_CG11226 +	1	copia	copia	22499	chr3L:22394430-22416929	chr3L:22,401,330-22,423,829	+	9.631	26.541
99	chr3L_nAcRalpha-80B +	1	S-element	S-element	6710	chr3L:23272243-23278953	chr3L:23,279,143-23,285,853	+	43.431	25.426
100	chr3R_not near genes_426	1	gypsy	gypsy	8821	chr3R:417766-426587	chr3R:4,592,044-4,600,865	-	75.835	69.789
101	chr3R_5-HT2 +	1	springer	springer	8738	chr3R:435403-444141	chr3R:4,609,681-4,618,419	-	43.966	35.127
102	chr3R_not near genes_843	1	gypsy	gypsy	6880	chr3R:837216-844096	chr3R:5,011,494-5,018,374	-	1.15	22.983
103	chr3R_cno -	2	I-element	springer	10789	chr3R:1012211-1023000	chr3R:5,186,489-5,197,278	+	5.051	22.02
104	chr3R_CG12163 -	1	gypsy	gypsy	11211	chr3R:1067540-1078751	chr3R:5,241,818-5,253,029	+	10.232	27.898
105	chr3R_CG11459 -	4	springer	springer	109915	chr3R:1838136-1948051	chr3R:6,012,414-6,122,329	+	332.583	380.156
106	chr3R_alpha-Est9 -	1	gypsy	gypsy	31403	chr3R:3324929-3356332	chr3R:7,499,207-7,530,610	+	3.504	40.7699
107	chr3R_CG11286 -	1	gypsy	gypsy	16791	chr3R:3599384-3616175	chr3R:7,773,662-7,790,453	+	0.549	29.516
108	chr3R_CG7918 +	2	HMS-Beagle	297	18236	chr3R:3878432-3896668	chr3R:8,052,710-8,070,946	-	0.583	14.477
109	chr3R_CG9821 -	1	springer	springer	5376	chr3R:4639997-4645373	chr3R:8,814,275-8,819,651	+	21.725	21.899
110	chr3R_CG11966 -	1	springer	springer	21030	chr3R:4785497-4806527	chr3R:8,959,775-8,980,805	+	37.355	52.6279
111	chr3R_CG16779 -	1	mdg1	mdg1	16246	chr3R:5304130-5320376	chr3R:9,478,408-9,494,654	+	0.533	109.873
112	chr3R_Teh1 -	1	roo	roo	27614	chr3R:5655760-5683374	chr3R:9,830,038-9,857,652	+	11.082	96.1599
113	chr3R_cwo +	1	412	412	8206	chr3R:6213325-6221531	chr3R:10,387,603-10,395,809	-	9.35	86.839
114	chr3R_CG18577 +	2	blood	hobo	7895	chr3R:7005474-7013369	chr3R:11,179,752-11,187,647	-	0.565	15.073
115	chr3R_CG12594 +	1	mdg3	mdg3	37056	chr3R:7520332-7557388	chr3R:11,694,610-11,731,666	-	10.523	45.94
116	chr3R_Octbeta2R -	2	springer	jockey	89999	chr3R:8354676-8444675	chr3R:12,528,954-12,618,953	+	40.875	111.485
117	chr3R_not near genes_942	1	mdg1	mdg1	11510	chr3R:9429858-9441368	chr3R:13,604,136-13,615,646	+	0.36	37.556
118	chr3R_NK7.1 -	1	springer	springer	8912	chr3R:10194611-10203523	chr3R:14,368,889-14,377,801	+	16.692	6.379
119	chr3R_soti -	2	blood	copia	11368	chr3R:10207361-10218729	chr3R:14,381,639-14,393,007	+	4.876	18.218
120	chr3R_jvl +	1	springer	springer	31972	chr3R:10598599-10630571	chr3R:14,772,877-14,804,849	-	9.923	52.555
121	chr3R_not near genes_108	1	gypsy	gypsy	11676	chr3R:10792843-10804519	chr3R:14,967,121-14,978,797	-	0.48	26.847
122	chr3R_CG42788 -	1	springer	springer	8502	chr3R:10953824-10962326	chr3R:15,128,102-15,136,604	+	11.297	9.036
123	chr3R_Tm1 +	1	copia	copia	10765	chr3R:11107860-11118625	chr3R:15,282,138-15,292,903	-	12.57	7.841
124	chr3R_alpha-Man-IIb +	1	FB	FB	30887	chr3R:11618487-11649374	chr3R:15,792,765-15,823,652	-	59.208	30.454
125	chr3R_CG42342 +	1	gypsy	gypsy	44999	chr3R:12337302-12382301	chr3R:16,511,580-16,556,579	-	7.44	30.723
126	chr3R_Dscam3 -	2	Bari1	gypsy	15421	chr3R:13314469-13329890	chr3R:17,488,747-17,504,168	+	16.589	7.715
127	chr3R_cpo +	1	gypsy	gypsy	48170	chr3R:13742964-13791134	chr3R:17,917,242-17,965,412	-	5.651	75.9319
128	chr3R_fru -	2	roo	gypsy	17169	chr3R:14303832-14321001	chr3R:18,478,110-18,495,279	+	8.242	46.9949
129	chr3R_cdi -	3	gypsy	blood	35808	chr3R:14884810-14920618	chr3R:19,059,088-19,094,896	+	60.24	228.247
130	chr3R_Naam +	2	springer	gypsy6	16080	chr3R:15497180-15513260	chr3R:19,671,458-19,687,538	-	120.828	95.011
131	chr3R_cic +	2	gypsy	gypsy	37945	chr3R:16073948-16111893	chr3R:20,248,226-20,286,171	-	6.817	50.526
132	chr3R_KaiRIA -	1	gypsy	gypsy	14999	chr3R:16477799-16492798	chr3R:20,652,077-20,667,076	+	0.481	23.51
133	chr3R_InR -	1	springer	springer	27235	chr3R:17444433-17471668	chr3R:21,618,711-21,645,946	+	30.945	28.285
134	chr3R_klg +	2	hobo	mdg1	22549	chr3R:18713074-18735623	chr3R:22,887,352-22,909,901	-	0.403	53.703
135	chr3R_CG4374 -	1	gypsy	gypsy	63984	chr3R:19242746-19306730	chr3R:23,417,024-23,481,008	+	2.13	43.5959
136	chr3R_Pli -	2	copia	springer	34372	chr3R:19694685-19729057	chr3R:23,868,963-23,903,335	+	27.589	58.3349
137	chr3R_nAcRalpha-96Aa -	1	gypsy	gypsy	15502	chr3R:20279573-20295075	chr3R:24,453,851-24,469,353	+	4.371	42.9339
138	chr3R_msi +	1	gypsy	gypsy	27570	chr3R:21352342-21379912	chr3R:25,526,620-25,554,190	-	2.576	12.626
139	chr3R_CR42745 +	2	springer	springer	5771	chr3R:22057514-22063285	chr3R:26,231,792-26,237,563	-	12.001	2.394
140	chr3R_TwdlB -	1	412	412	7815	chr3R:22447816-22455631	chr3R:26,622,094-26,629,909	+	0.051	20.106
141	chr3R_beat-VII -	2	gypsy	mdg3	24346	chr3R:22471818-22496164	chr3R:26,646,096-26,670,442	+	0.703	20.853
142	chr3R_not near genes_239	2	blood	Transpac	6469	chr3R:23957984-23964453	chr3R:28,132,262-28,138,731	-	1.442	28.455
143	chr3R_larp -	1	springer	springer	15829	chr3R:24156692-24172521	chr3R:28,330,970-28,346,799	+	37.298	58.9439
144	chr3R_beat-VI +	1	mdg1	mdg1	19100	chr3R:24241710-24260810	chr3R:28,415,988-28,435,088	-	1.649	98.338
145	chr3R_Doa +	1	springer	springer	8270	chr3R:24729289-24737559	chr3R:28,903,567-28,911,837	-	8.879	12.946
146	chr3R_CR31044 +	1	springer	springer	19857	chr3R:25020848-25040705	chr3R:29,195,126-29,214,983	-	147.145	198.631
147	chr3R_not near genes_251	3	I-element	mdg1	25702	chr3R:25088331-25114033	chr3R:29,262,609-29,288,311	-	21.071	21.258
148	chr3R_Ptp99A +	2	springer	gypsy	56418	chr3R:25210989-25267407	chr3R:29,385,267-29,441,685	-	0.894	17.436
149	chr3R_kay +	1	gypsy	gypsy	4873	chr3R:25587059-25591932	chr3R:29,761,337-29,766,210	-	0.799	23.876
150	chr3R_CG18404 +	1	springer	springer	20355	chr3R:26081706-26102061	chr3R:30,255,984-30,276,339	+	145.974	129.303
151	chr3R_hdc +	1	springer	springer	19999	chr3R:26149746-26169745	chr3R:30,324,024-30,344,023	-	55.285	36.894
152	chr3R_not near genes_264	1	springer	springer	43933	chr3R:26495452-26539385	chr3R:30,669,730-30,713,663	+	68.4559	121.074
153	chr3R_5-HT7 -	1	412	412	45782	chr3R:26787962-26833744	chr3R:30,962,240-31,008,022	-	39.544	56.767
154	chr3R_not near genes_275	1	gypsy	gypsy	10497	chr3R:27528230-27538727	chr3R:31,702,508-31,713,005	+	1.596	38.59
155	chr3R_heph -	1	roo	roo	19411	chr3R:27685181-27704592	chr3R:31,859,459-31,878,870	+	11.298	0.837
156	chr4_CORL -	1	1360	1360	29999	chr4:976504-1006503	chr4:955,878-985,877	+	42.023	68.2868
157	chrX_CG32816 -	1	gypsy	gypsy	9999	chrX:272233-282232	chrX:378,200-388,199	+	3.228	24.725
158	chrX_kirre +	1	flea	flea	41374	chrX:2975756-3017130	chrX:3,081,723-3,123,097	-	2.438	185.731
159	chrX_dnc +	1	gypsy	gypsy	9999	chrX:3143630-3153629	chrX:3,249,597-3,259,596	-	1.133	28.057
160	chrX_not near genes_325	2	flea	springer	79265	chrX:3180121-3259386	chrX:3,286,088-3,365,353	-	69.636	102.936
161	chrX_CG12535 -	1	gypsy	gypsy	11966	chrX:3314972-3326938	chrX:3,420,939-3,432,905	-	10.371	51.273
162	chrX_Fas2 -	2	blood	springer	53744	chrX:4052581-4106325	chrX:4,158,548-4,212,292	+	41.929	154.958
163	chrX_not near genes_492	1	gypsy	gypsy	34940	chrX:4894024-4928964	chrX:4,999,991-5,034,931	-	6.816	63.6689
164	chrX_SK +	1	springer	springer	31066	chrX:5223405-5254471	chrX:5,329,372-5,360,438	-	59.459	89.6349
165	chrX_SPR +	1	roo	roo	24857	chrX:5315006-5339863	chrX:5,420,973-5,445,830	-	49.343	27.729
166	chrX_CG32762 -	1	412	412	9999	chrX:5392925-5402924	chrX:5,498,892-5,508,891	+	0.359	14.414
167	chrX_CG42240 +	1	springer	springer	18767	chrX:6210262-6229029	chrX:6,316,229-6,334,996	-	92.613	115.155
168	chrX_CG43736 +	1	springer	springer	7037	chrX:6750991-6758028	chrX:6,856,958-6,863,995	-	13.583	2.673
169	chrX_CG14431 +	1	gypsy	gypsy	42618	chrX:6767282-6809900	chrX:6,873,249-6,915,867	-	4.818	54.607
170	chrX_Tbh +	2	springer	297	38921	chrX:7883542-7922463	chrX:7,989,509-8,028,430	-	100.841	209.13
171	chrX_fs(1)h -	2	297	gypsy	9748	chrX:7926220-7935968	chrX:8,032,187-8,041,935	+	10.425	9.213
172	chrX_sdt +	2	springer	springer	22867	chrX:8106249-8129116	chrX:8,212,216-8,235,083	-	42.181	18.27
173	chrX_CG1632 +	2	springer	gypsy	7393	chrX:8146159-8153552	chrX:8,252,126-8,259,519	-	68.808	43.666
174	chrX_fend -	1	gypsy	gypsy	10759	chrX:9025167-9035926	chrX:9,131,134-9,141,893	+	5.984	40.714
175	chrX_spri -	1	gypsy	gypsy	62203	chrX:10419057-10481260	chrX:10,525,024-10,587,227	+	12.885	43.4789
176	chrX_Ant2 -	1	springer	springer	23175	chrX:10679619-10702794	chrX:10,785,586-10,808,761	+	12.988	40.218
177	chrX_sbr -	1	gypsy	gypsy	4408	chrX:10736909-10741317	chrX:10,842,876-10,847,284	+	3.469	16.29
178	chrX_Pkcdelta +	3	blood	mdg3	9999	chrX:12311720-12321719	chrX:12,417,687-12,427,686	-	0.377	36.562
179	chrX_Pde9 -	1	1360	1360	14763	chrX:12785921-12800684	chrX:12,891,888-12,906,651	+	10.837	4.326
180	chrX_Neto +	2	Juan	gypsy	23601	chrX:13313400-13337001	chrX:13,419,367-13,442,968	-	1.198	25.037
181	chrX_mud +	1	roo	roo	15877	chrX:14137415-14153292	chrX:14,243,382-14,259,259	-	5.666	13.435
182	chrX_CG9411 -	2	springer	springer	49807	chrX:14,371,777-14412187	chrX:14,477,771-14,518,877	+	161.389	137.957
183	chrX_not near genes_145	1	springer	springer	14431	chrX:14548255-14562686	chrX:14,654,222-14,668,653	-	57.545	54.318
184	chrX_sd +	1	gypsy	gypsy	10545	chrX:15696953-15707498	chrX:15,802,920-15,813,465	-	17.755	29.246
185	chrX_if -	2	gypsy	springer	16659	chrX:16653657-16670316	chrX:16,759,624-16,776,283	+	5.187	47.4679
186	chrX_CG5004 +	1	springer	springer	4391	chrX:17001532-17005923	chrX:17,107,499-17,111,890	-	12.826	1.618
187	chrX_Fim -	1	copia	copia	3569	chrX:17191269-17194838	chrX:17,297,236-17,300,805	+	11.472	1.431
188	chrX_CG43658 -	1	springer	springer	44999	chrX:17359911-17404910	chrX:17,465,878-17,510,877	+	25.057	33.07
189	chrX_CG32547 -	1	412	412	24360	chrX:18369654-18394014	chrX:18,475,621-18,499,981	+	4.378	67.7019
190	chrX_Pk17E +	2	gypsy	springer	16279	chrX:18682309-18698588	chrX:18,788,276-18,804,555	-	24.989	41.354
191	chrX_out -	4	springer	flea	62204	chrX:19183872-19246076	chrX:19,289,839-19,352,043	+	62.508	156.876
192	chrX_vfl -	1	gypsy	gypsy	13530	chrX:19678106-19691636	chrX:19,784,073-19,797,603	+	3.64	50.644
193	chrX_vfl -	1	springer	springer	4254	chrX:19677631-19681885	chrX:19,783,598-19,787,852	-	45.833	28.782
194	chrX_Hers +	1	hopper	hopper	19621	chrX:19759700-19779321	chrX:19,865,667-19,885,288	-	26.44	42.228
195	chrX_not near genes_198	1	412	412	9999	chrX:19872746-19882745	chrX:19,978,713-19,988,712	-	1.116	26.474
196	chrX_CG9572 +	1	springer	springer	17701	chrX:20025523-20043224	chrX:20,131,490-20,149,191	-	3.022	16.492
197	chrX_shakB -	2	springer	flea	72654	chrX:20723766-20796420	chrX:20,852,739-20,925,393	+	94.698	119.099
198	chrX_not near genes_208	2	mdg1	BS	13527	chrX:20862220-20875747	chrX:20,991,193-21,004,720	+	1.048	162.024
199	chrX_bves +	1	springer	springer	10498	chrX:20938645-20949143	chrX:21,067,618-21,078,116	-	6.28	74.456
200	chrX_not near genes_209	1	mdg3	mdg3	19147	chrX:20942160-20961307	chrX:21,071,133-21,090,280	+	41.379	47.0379
201	chrX_CG14579 +	1	Quasimodo	Quasimodo	29146	chrX:21047049-21076195	chrX:21,176,022-21,205,168	-	26.478	295.141
202	chrX_not near genes_213	1	springer	springer	43832	chrX:21336197-21380029	chrX:21,465,170-21,509,002	+	90.567	109.278
203	chrX_not near genes_214	1	Transpac	Transpac	9597	chrX:21456977-21466574	chrX:21,585,950-21,595,547	-	31.239	81.539
204	chrX_not near genes_216	1	gypsy11	gypsy11	43934	chrX:21643506-21687440	chrX:21,841,943-21,885,877	+	77.31	33.868

## Sheet: Common_lncRNAs
Table S5. TE-associated LncRNAs in Drosophila gonadal cell cultures. Tab: Common lncRNAs
Common lncRNA	OSS lncRNA #	Release 5 coordinates			Release 6 coordinates			Length	OSC lncRNA #	Release 5 coordinates			Release 6 coordinates			Length	Overlap
		OSS Chr	OSS Start	OSS End	OSS Chr	OSS Start	OSS End			OSC Chr	OSC Start	OSC End	OSC Chr	OSC Start	OSC End
1	14	chr2L	3888270	3960564	chr2L	3888270	3960564	72294	5	chr2L	3906486	3928440	chr2L	3906486	3928440	21954	21954
2	58	chr2R	2732471	2748053	chr2R	6844966	6860548	15582	41	chr2R	2731056	2737241	chr2R	6843551	6849736	6185	4770
3	93	chr2R	15032714	15062713	chr2R	19145209	19175208	29999	55	chr2R	15043848	15046068	chr2R	19156343	19158563	2220	2220
4	100	chr2R	16265183	16310182	chr2R	20377678	20422677	44999	56	chr2R	16278531	16301537	chr2R	20391026	20414032	23006	23006
5	111	chr3L	756000	803559	chr3L	756000	803559	47559	64	chr3L	779956	785016	chr3L	779956	785016	5060	5060
6	112	chr3L	995483	1186938	chr3L	995483	1186938	191455	65	chr3L	1094988	1099093	chr3L	1094988	1099093	4105	4105
7	114	chr3L	2837630	2883909	chr3L	2837630	2883909	46279	66	chr3L	2875316	2886897	chr3L	2875316	2886897	11581	8593
8	163	chr3R	1826965	1929275	chr3R	6001243	6103553	102310	105	chr3R	1838136	1948051	chr3R	6012414	6122329	109915	91139
9	164	chr3R	1938219	1945572	chr3R	6112497	6119850	7353	105	chr3R	1838136	1948051	chr3R	6012414	6122329	109915	7353
10	176	chr3R	5666096	5697194	chr3R	9840374	9871472	31098	112	chr3R	5655760	5683374	chr3R	9830038	9857652	27614	17278
11	180	chr3R	7538978	7542959	chr3R	11713256	11717237	3981	115	chr3R	7520332	7557388	chr3R	11694610	11731666	37056	3981
12	185	chr3R	9428120	9458119	chr3R	13602398	13632397	29999	117	chr3R	9429858	9441368	chr3R	13604136	13615646	11510	11510
13	190	chr3R	13320412	13330411	chr3R	17494690	17504689	9999	126	chr3R	13314469	13329890	chr3R	17488747	17504168	15421	9478
14	192	chr3R	13759339	13761567	chr3R	17933617	17935845	2228	127	chr3R	13742964	13791134	chr3R	17917242	17965412	48170	2228
15	205	chr3R	22048020	22060917	chr3R	26222298	26235195	12897	139	chr3R	22057514	22063285	chr3R	26231792	26237563	5771	3403
16	217	chr3R	25038801	25044370	chr3R	29213079	29218648	5569	146	chr3R	25020848	25040705	chr3R	29195126	29214983	19857	1904
17	218	chr3R	25092831	25116253	chr3R	29267109	29290531	23422	147	chr3R	25088331	25114033	chr3R	29262609	29288311	25702	21202
18	240	chrX	2976042	2992120	chrX	3082009	3098087	16078	158	chrX	2975756	3017130	chrX	3081723	3123097	41374	16078
19	251	chrX	4845837	4959402	chrX	4951804	5065369	113565	163	chrX	4894024	4928964	chrX	4999991	5034931	34940	34940
20	258	chrX	6755450	6757813	chrX	6861417	6863780	2363	168	chrX	6750991	6758028	chrX	6856958	6863995	7037	2363
21	269	chrX	12785567	12797030	chrX	12891534	12902997	11463	179	chrX	12785921	12800684	chrX	12891888	12906651	14763	11109
22	279	chrX	19195593	19201738	chrX	19301560	19307705	6145	191	chrX	19183872	19246076	chrX	19289839	19352043	62204	6145
23	280	chrX	19681796	19690163	chrX	19787763	19796130	8367	192	chrX	19678106	19691636	chrX	19784073	19797603	13530	8367
24	282	chrX	19875466	20013303	chrX	19981433	20119270	137837	193	chrX	19872746	19882745	chrX	19978713	19988712	9999	7279
25	286	chrX	20859315	20904457	chrX	20988288	21033430	45142	198	chrX	20862220	20875747	chrX	20991193	21004720	13527	13527
26	289	chrX	21650344	21679425	chrX	21779317	21878785	29081	204	chrX	21643506	21687440	chrX	21772479	22263448	43934	29081
